# Supplementary material for: IncRNA‐ZFAS1, an Emerging Gate‐Keeper in DNA Damage‐Dependent Transcriptional Regulation
Source: Adv Sci (Weinh). 2025 May 24;12(31):e12385. doi: 10.1002/advs.202412385 (PMC12376587; doi:10.1002/advs.202412385)
Supplement: Supplementary file 4 — Supplemental Table S3 [file ADVS-12-e12385-s012.xlsx]

## Sheet: mRNA_UV_cluster 1
transcript_id	gene_id	gene_name	C_0	UV_3	UV_6	UV_9	UV_12	UV_24	UV_48	UV_24	UV_96
ENST00000645576	ENSG00000075624	ACTB	385.999	14.6331	18.1556	42.5787	12.6025	7.17627	10.6869	7.17627	54.7268
ENST00000546990	ENSG00000089157	RPLP0	260.115	0	0	27.3129	12.6585	0	0	0	0
ENST00000578186	ENSG00000270882	HIST2H4A	171.008	0.128578	17.7303	11.9198	19.3965	0.120387	3.99102	0.120387	0.142398
ENST00000649973	ENSG00000104738	MCM4	143.298	0	0	0	0	0	0	0	0
ENST00000451301	ENSG00000123562	MORF4L2	69.9816	2.53528	4.47771	2.4054	6.92417	3.24726	5.96218	3.24726	7.62924
ENST00000550566	ENSG00000089009	RPL6	64.2958	2.2689	2.12334	2.35042	1.7255	1.51906	1.79592	1.51906	1.23982
ENST00000592683	ENSG00000176014	TUBB6	48.9126	0	0	3.36943	0	0	0.058479	0	0.040941
ENST00000553474	ENSG00000182199	SHMT2	46.1351	0.029485	0	0.000398	0	0.008447	0.011044	0.008447	0
ENST00000549164	ENSG00000135390	ATP5MC2	28.222	0	0	0	0	0	0	0	0
ENST00000375094	ENSG00000204308	RNF5	28.0764	0.007097	3.4e-05	0.014884	0.014955	0.009038	0.011894	0.009038	0.015561
ENST00000433834	ENSG00000077549	CAPZB	24.0311	0.406128	0.277801	0.134986	0.09293	0.218517	0.392821	0.218517	0.587755
ENST00000362031	ENSG00000129515	SNX6	23.0968	0.272766	0.29752	0.151174	0.351265	0.210408	0.30934	0.210408	0.43591
ENST00000621318	ENSG00000166508	MCM7	22.7896	0.040189	0.282172	0.242454	0.249442	0.064244	0.18255	0.064244	1.07416
ENST00000540149	ENSG00000159720	ATP6V0D1	19.35	0.074529	0.002349	0.068928	0	0.055186	0.205172	0.055186	5.4074
ENST00000550238	ENSG00000089009	RPL6	17.9558	0	0	2.89186	0.686842	0.00373	0.002403	0.00373	0
ENST00000573600	ENSG00000175826	CTDNEP1	17.5274	0.815974	4.24931	1.26048	3.30669	0.046245	0.278381	0.046245	1.11222
ENST00000587718	ENSG00000126247	CAPNS1	17.3284	0.013832	0.019209	0.004337	6.05485	0.005138	0.060262	0.005138	0.006889
ENST00000544615	ENSG00000175567	UCP2	16.7313	0.112556	0.329767	0.128447	0.574753	0.446776	0.138897	0.446776	0.29057
ENST00000512041	ENSG00000167085	PHB	16.7183	0.05726	6.10995	0.233189	0	0.12211	0.01071	0.12211	0.015206
ENST00000422748	ENSG00000122786	CALD1	16.3417	0.84785	0.862609	0.424377	0.359686	0.492478	0.835425	0.492478	0.498757
ENST00000466814	ENSG00000196428	TSC22D2	15.9997	0.445679	0.828868	0.580397	0.931142	1.43849	0.685861	1.43849	0.788432
ENST00000393614	ENSG00000168710	AHCYL1	15.3099	0.055968	0.065475	0	0	0.025156	0.00236	0.025156	0.002572
ENST00000448933	ENSG00000164402	2021-09-08	14.5603	0.002099	0	0	0	0.002535	7.68742	0.002535	0.000293
ENST00000355476	ENSG00000168214	RBPJ	14.3478	0.181861	0.150938	0.132233	5.89918	0.277232	0.357263	0.277232	0.294548
ENST00000423105	ENSG00000155438	NIFK	13.4867	0.10445	0.077808	0.106508	0.041318	0.047866	0.076081	0.047866	0.024417
ENST00000381570	ENSG00000127870	RNF6	12.8024	0.755703	0.644101	0.196286	0.345183	0.306514	0.132558	0.306514	0.186022
ENST00000206380	ENSG00000091947	TMEM101	12.7793	0.578753	0.3297	0.237915	0.17079	0.139098	1.99897	0.139098	0.132722
ENST00000529029	ENSG00000137693	YAP1	11.6534	0	0	2.20713	0	0	4.03301	0	0
ENST00000395580	ENSG00000134283	PPHLN1	11.549	0.228424	0.144374	0.128651	0.174645	0.245543	0.184352	0.245543	0.903005
ENST00000309519	ENSG00000117411	B4GALT2	11.3928	0.055385	0.0371	0.072586	0.1113	0.034086	0.079053	0.034086	0.062566
ENST00000394593	ENSG00000171492	LRRC8D	11.1922	0	0.002241	0.004287	4.04404	0.114946	0.003469	0.114946	0
ENST00000432931	ENSG00000134453	RBM17	10.9146	0	0	0	4.81664	0	0	0	0
ENST00000422602	ENSG00000039523	RIPOR1	10.5913	0	2.30827	0	2.7036	0.170318	0	0.170318	0
ENST00000405409	ENSG00000100320	RBFOX2	9.46232	0.416311	0.374903	0.790712	1.54809	0.370157	0.457642	0.370157	0.379187
ENST00000645775	ENSG00000151491	EPS8	9.31229	0	0.006108	0.000936	1.29084	2.92136	0.006271	2.92136	0.004296
ENST00000439210	ENSG00000135506	OS9	9.26944	0.303154	0.341178	0	0.279163	0.351881	0.30942	0.351881	0.263273
ENST00000541231	ENSG00000150779	TIMM8B	8.5953	2.3e-05	0	0.018982	8e-06	1e-06	9e-05	1e-06	3e-06
ENST00000537663	ENSG00000180537	RNF182	8.28136	0	2.35387	0	0	0.354181	0	0.354181	0
ENST00000544816	ENSG00000187109	NAP1L1	8.17174	0	0	0	1.74777	0.373478	0.907114	0.373478	0
ENST00000453394	ENSG00000113522	RAD50	8.08578	0.20414	0	0	0	0	0	0	0
ENST00000613205	ENSG00000137497	NUMA1	7.82634	1.73215	0	0	0	0	0	0	0
ENST00000236925	ENSG00000118200	CAMSAP2	7.39663	0	0.000284	0.0051	0	2.48154	0.000144	2.48154	0
ENST00000381441	ENSG00000109184	DCUN1D4	7.37993	0.246826	0.011752	0.10971	0.010562	0.005366	0.034517	0.005366	1.87641
ENST00000557722	ENSG00000140105	WARS	7.34404	0.058823	0.029238	0.001283	0.000117	0.023806	0.06182	0.023806	0.001126
ENST00000424842	ENSG00000151208	DLG5	6.96332	0	0	0	0	0	0	0	0
ENST00000335272	ENSG00000180957	PITPNB	6.93698	0.016043	0	0.0827	0.120278	0.045524	0.052198	0.045524	1.63663
ENST00000645114	ENSG00000197102	DYNC1H1	6.93356	0.136357	0.078642	0.036938	0.07934	0.041006	0.050941	0.041006	0.048359
ENST00000651544	ENSG00000134900	TPP2	6.8769	0	0	0	0	0	0	0	0
ENST00000447208	ENSG00000183597	TANGO2	6.78501	0	0.165563	0	0	0.218198	0	0.218198	0.125804
ENST00000409314	ENSG00000137478	FCHSD2	6.43172	0	0.864723	0.000709	0	0.089641	0	0.089641	0
ENST00000458537	ENSG00000136603	SKIL	5.84001	0.043598	0.057903	0.119944	0.380546	0.362956	0.050417	0.362956	0.118729
ENST00000539137	ENSG00000167881	SRP68	5.7623	0	0	0.599743	0	0	0	0	0
ENST00000368809	ENSG00000197747	S100A10	5.6659	0.329027	0.402673	0.235563	0.373096	0.207514	0.43514	0.207514	0.665354
ENST00000502949	ENSG00000091490	SEL1L3	5.66464	0	0.505954	0	0	0	0	0	0
ENST00000504366	ENSG00000170445	HARS	5.53677	1.27005	1.47314	0.002414	0.232467	0.328915	0.045821	0.328915	0.021585
ENST00000650546	ENSG00000079739	PGM1	5.52606	0	0	0	0	0.01365	0.003514	0.01365	0
ENST00000408954	ENSG00000196730	DAPK1	5.4457	1.77547	0.19665	0.06839	0.101046	0.094659	0.351969	0.094659	0.182076
ENST00000578558	ENSG00000177731	FLII	5.41525	0	0	0.007958	0	0.028878	0	0.028878	0.016468
ENST00000616923	ENSG00000001084	GCLC	5.35374	0	0	0	0	0	0	0	0
ENST00000356147	ENSG00000132670	PTPRA	5.33176	0	0	0	0	0	0	0	0
ENST00000409840	ENSG00000135919	SERPINE2	5.24239	0	0.018119	0	0.000766	0.008358	0.002602	0.008358	1.03996
ENST00000513281	ENSG00000143420	ENSA	5.22712	0.284362	0.276614	0.172782	0.262175	0.180836	0.523334	0.180836	0.530413
ENST00000645028	ENSG00000135905	DOCK10	5.17822	0	0	0	0	0	0	0	0
ENST00000265375	ENSG00000108100	CCNY	4.89009	0	0	0	0	0.000668	0.010359	0.000668	0
ENST00000341698	ENSG00000124208	TMEM189-UBE2V1	4.80361	0	0	0	0	2.61986	0	2.61986	0
ENST00000540113	ENSG00000182919	C11orf54	4.77212	0	0.041504	0.077004	0.038321	0.04885	0.057075	0.04885	0.050907
ENST00000523739	ENSG00000164930	FZD6	4.6271	0.085263	0.176286	0.194613	0.100528	0.245436	0.798534	0.245436	1.27227
ENST00000321919	ENSG00000140632	GLYR1	4.5931	0.08424	0.09256	0.200719	0.401534	0.148327	0.363903	0.148327	0.101855
ENST00000455781	ENSG00000050748	MAPK9	4.56581	0.619713	0.036276	0	0.013456	0	0.021484	0	0
ENST00000611067	ENSG00000012171	SEMA3B	4.50062	0.399062	0.288631	0	0	0	0	0	0.378612
ENST00000315183	ENSG00000090905	TNRC6A	4.49123	0	0.342967	0.209915	0.188752	0.518176	0.501016	0.518176	0.209368
ENST00000380961	ENSG00000101849	TBL1X	4.47909	0.061822	0.134425	0.03381	0.023193	0.007327	0.013643	0.007327	0.007076
ENST00000527411	ENSG00000079819	EPB41L2	4.44083	0	0	0	0	0	0	0	0
ENST00000439220	ENSG00000103653	CSK	4.42946	0.098557	0.107266	0.076698	0.06391	0.167815	0.085464	0.167815	0.075787
ENST00000392464	ENSG00000170633	RNF34	4.41957	0.230098	0.326455	0.553794	0.601239	0.218848	0.30997	0.218848	0.066288
ENST00000343004	ENSG00000156504	FAM122B	4.37025	0.538655	0.18836	0.056125	0.093243	0.15574	0.31832	0.15574	0.441946
ENST00000406548	ENSG00000182944	EWSR1	4.3586	0.665257	0.671882	0.154056	0.200669	0.336046	0.278998	0.336046	0.260832
ENST00000396595	ENSG00000064042	LIMCH1	4.30747	0	0	0	0	2.02878	0	2.02878	0
ENST00000432483	ENSG00000138777	PPA2	4.29725	2.36438	0	0	0	0	0	0	0
ENST00000650260	ENSG00000158966	CACHD1	4.27794	0.001634	0	0	0.000486	0.00155	0	0.00155	0.000451
ENST00000370477	ENSG00000102081	FMR1	4.15851	0.073497	0.122959	0.092964	0.093556	0.11607	0.063467	0.11607	0.0617
ENST00000486347	ENSG00000156504	FAM122B	4.15527	0.047848	0.060982	0.111404	0.172339	0.944251	0.603198	0.944251	0.054509
ENST00000652449	ENSG00000163932	PRKCD	4.12249	0.497862	0	0.020533	0.57722	0.459771	0.259645	0.459771	0.502666
ENST00000355499	ENSG00000163374	YY1AP1	4.10491	0.097171	0.12965	0.150633	0.254597	0.042061	0.127637	0.042061	0.273336
ENST00000513970	ENSG00000158402	CDC25C	4.10097	0.000453	0.000549	8.5e-05	0	0.00203	0.004929	0.00203	0.004104
ENST00000620786	ENSG00000130779	CLIP1	4.07395	0.002623	0.004234	0	0	1.73407	0.014422	1.73407	0.001368
ENST00000218200	ENSG00000102081	FMR1	4.0685	0.026626	0.106834	0.069411	0.166385	0.254587	0.011307	0.254587	0.097884
ENST00000521522	ENSG00000183137	CEP57L1	4.01393	0	0.007756	0.209814	0.013514	0.034884	0.032452	0.034884	0.017668
ENST00000369969	ENSG00000121940	CLCC1	3.91142	0.243669	0	0	0.170957	0	0	0	0
ENST00000636962	ENSG00000136854	STXBP1	3.90777	0.191624	0.262961	0.016547	0.037796	0.299204	0.266721	0.299204	0.178436
ENST00000315127	ENSG00000179151	EDC3	3.80763	0.081826	0.047034	0.053005	0.156543	0.142027	0.162396	0.142027	0.169553
ENST00000373988	ENSG00000147130	ZMYM3	3.69118	0.340868	0	0.002335	0	0	1.29451	0	0
ENST00000395198	ENSG00000148634	HERC4	3.65139	0.041699	0.125132	0	0.051953	0.013796	0.030625	0.013796	0.016009
ENST00000506581	ENSG00000163682	RPL9	3.62854	0	0	1.02452	0	0	0	0	0
ENST00000491773	ENSG00000126088	UROD	3.61708	0.172794	0.093252	0.082228	0.096378	0.120317	0.26454	0.120317	0.156802
ENST00000480861	ENSG00000106348	IMPDH1	3.49378	0	0	0.264255	0	0.190112	0	0.190112	0
ENST00000512884	ENSG00000138772	ANXA3	3.4279	2.20223	0	0	0	0	0	0	0
ENST00000439526	ENSG00000102081	FMR1	3.3595	0	0	0.01656	0	0.434178	0.097418	0.434178	0.091262
ENST00000376514	ENSG00000167615	LENG8	3.35178	0.049208	0.142473	0.026911	0.147155	0.19375	1.15275	0.19375	0.179222
ENST00000520179	ENSG00000168575	SLC20A2	3.33702	0.000533	0	0	9.8e-05	0.000265	0	0.000265	1.16821
ENST00000332231	ENSG00000183020	AP2A2	3.31787	0.237712	0.304266	0.059566	0.102008	0.099467	0.203126	0.099467	0.184273
ENST00000587210	ENSG00000123159	GIPC1	3.19291	0.007607	0.007131	0.005433	0.016565	0.006507	0.021938	0.006507	0.008703
ENST00000644289	ENSG00000111642	CHD4	3.17443	0.308324	0.322833	0.000395	0.124118	0	0.294394	0	0.44734
ENST00000568651	ENSG00000051108	HERPUD1	3.12894	0	0	0	0	0.067689	0	0.067689	0
ENST00000336199	ENSG00000117020	AKT3	3.06086	0	0	0	0	0	0	0	0
ENST00000311117	ENSG00000005483	KMT2E	2.96554	0.306562	0.05178	0	0.02696	0.496994	0.437488	0.496994	0.283309
ENST00000588952	ENSG00000130816	DNMT1	2.90926	0.020325	0.008098	0.024997	0	0	0.563429	0	0.127665
ENST00000343765	ENSG00000151445	VIPAS39	2.80239	0	0	0	0	0	0	0	0
ENST00000322313	ENSG00000136709	WDR33	2.79713	0.213502	0.027536	0.044589	0.347037	0.118965	0.165327	0.118965	0.177212
ENST00000443006	ENSG00000146701	MDH2	2.72112	0.328703	0	0	0.027839	0.306213	0.408953	0.306213	0.379816
ENST00000521089	ENSG00000113645	WWC1	2.68917	0.112726	0.21789	0.021439	0.074794	0.177084	0.180927	0.177084	0.165836
ENST00000407325	ENSG00000183671	GPR1	2.67308	1.44369	5e-06	0	8.4e-05	0	0.000142	0	0.089833
ENST00000542169	ENSG00000180998	GPR137C	2.67237	1.31184	0	0	0	0	0.330239	0	0
ENST00000438058	ENSG00000100242	SUN2	2.64328	0.981744	0	0	0	0	0	0	8.9e-05
ENST00000409830	ENSG00000144366	GULP1	2.59442	0.061441	0.138073	0.079158	0.006041	0.083058	0.205079	0.083058	0.137291
ENST00000594395	ENSG00000197782	ZNF780A	2.59112	0.051029	0.075687	0.048938	0.089378	0.055916	0.062225	0.055916	0.049038
ENST00000382203	ENSG00000080503	SMARCA2	2.58412	0.021604	0.00021	0.002858	0	1.10925	0.02155	1.10925	0.001565
ENST00000627286	ENSG00000015171	ZMYND11	2.49234	0	0	0.530569	0	0	1.01204	0	0
ENST00000373773	ENSG00000101079	NDRG3	2.45571	0.253668	0.00016	0.006598	0.247746	0.174446	0.000102	0.174446	0.202037
ENST00000360091	ENSG00000182944	EWSR1	2.4066	0.070359	0.057614	0.056766	0.173764	0.071505	0.03415	0.071505	0.250644
ENST00000377080	ENSG00000102226	USP11	2.37345	0.012628	0	0.166351	0.006817	0	0.118637	0	0
ENST00000509503	ENSG00000184349	EFNA5	2.3547	0.083432	0.037758	0	0.073038	0.062852	0.094651	0.062852	0.225851
ENST00000273582	ENSG00000145016	RUBCN	2.3387	0	0	0.001941	0	0.017459	0.000202	0.017459	0.000981
ENST00000409712	ENSG00000116030	SUMO1	2.33243	0.171816	0.091094	0.076909	0.43251	0.121602	0.368246	0.121602	0.088914
ENST00000377967	ENSG00000147050	KDM6A	2.23712	0.049737	0.017755	0.052019	0.071702	0.151936	0.113537	0.151936	0.111702
ENST00000555219	ENSG00000092020	PPP2R3C	2.1529	7e-05	0.006657	0	0.02027	0	0	0	0.002586
ENST00000370715	ENSG00000117114	ADGRL2	2.11262	0.010003	0.130721	0.011236	0	0.000733	0.000296	0.000733	0.010506
ENST00000585024	ENSG00000161960	EIF4A1	2.09419	0	1.18024	0	0	0	0	0	0
ENST00000341511	ENSG00000107331	ABCA2	2.09024	0	0	0	0	0	0.003575	0	0
ENST00000512194	ENSG00000138641	HERC3	2.08641	0.074155	0.186543	0	0	0.122634	0	0.122634	0.044644
ENST00000612484	ENSG00000086758	HUWE1	2.07559	0.18543	0.294772	0.027344	0.192551	0.021957	0.035637	0.021957	0.033376
ENST00000550527	ENSG00000120868	APAF1	2.07123	0.398326	0	0	0	0.170659	0	0.170659	0.617885
ENST00000539737	ENSG00000103005	USB1	2.03763	0	0.034187	0.196675	0.075209	0.266391	0	0.266391	0
ENST00000375031	ENSG00000189410	SH2D5	1.99783	0	0	0	1.08362	0	0	0	0
ENST00000392376	ENSG00000141552	ANAPC11	1.98396	0	0.000174	0.062104	0	0.067807	6.2e-05	0.067807	0
ENST00000517990	ENSG00000070756	PABPC1	1.94196	0	0.473727	0	0.471947	0	0.139904	0	0
ENST00000537460	ENSG00000127314	RAP1B	1.92538	0.106203	0.159116	0.108612	0.144865	0.153926	0.281954	0.153926	0.033542
ENST00000642510	ENSG00000184154	LRTOMT	1.91388	0.166677	0.084276	0.155484	0.393469	0	0.13279	0	0.067439
ENST00000558554	ENSG00000166411	IDH3A	1.90794	0	0	0	0	0.28878	0	0.28878	0.11326
ENST00000380485	ENSG00000102048	ASB9	1.88707	0.155313	0.000284	0.020382	0.148214	0.158516	0.180803	0.158516	0.20668
ENST00000252085	ENSG00000253159	PCDHGA12	1.87426	0	0	0.223525	0.000693	0	0	0	0
ENST00000360768	ENSG00000196715	VKORC1L1	1.87008	0.008455	0.017826	0.065647	0.025673	0.039789	0.052493	0.039789	0.026498
ENST00000457688	ENSG00000155111	CDK19	1.86517	0	0	0.253531	0	0	0.005943	0	0
ENST00000537215	ENSG00000166888	STAT6	1.83072	0.120358	0	0	0.068053	0.150267	0.272591	0.150267	0.261692
ENST00000595565	ENSG00000104980	TIMM44	1.80843	0	0	0	0	0	0	0	0
ENST00000544855	ENSG00000109390	NDUFC1	1.79487	0.649403	0.00827	0.029195	0.008777	0.203547	0.01471	0.203547	0
ENST00000290244	ENSG00000205758	CRYZL1	1.76255	0	0.063827	0	0	0.119854	0.648739	0.119854	0
ENST00000450136	ENSG00000119401	TRIM32	1.75908	0.702233	0.011278	0.03648	0.05195	0.130804	0.017839	0.130804	0.00684
ENST00000266564	ENSG00000139197	PEX5	1.73372	0	0	0.177909	0.093361	0.064038	0.075882	0.064038	0.537348
ENST00000355957	ENSG00000124222	STX16	1.73113	0	0.047208	0.000497	0.043151	0.004263	0.0002	0.004263	0.025885
ENST00000432109	ENSG00000064012	CASP8	1.70282	0	0	0	0	0	0	0	1.13324
ENST00000210227	ENSG00000119314	PTBP3	1.67607	0.395357	0.064258	0.018689	0	0.035878	0.05334	0.035878	0.048539
ENST00000644176	ENSG00000067798	NAV3	1.654	0.050991	0.050951	0.187646	0.002021	0.137258	0.103676	0.137258	0.250831
ENST00000622045	ENSG00000275066	SYNRG	1.60976	0.006621	0.012851	0.00034	0.024751	0.020223	0.109957	0.020223	0.005149
ENST00000583356	ENSG00000170921	TANC2	1.59373	0	0.170213	0	0	0	0	0	0.487985
ENST00000416691	ENSG00000133103	COG6	1.58051	0.007373	2.3e-05	0.001362	0.001755	0.020261	0	0.020261	0.144855
ENST00000379448	ENSG00000151612	ZNF827	1.57981	0	0.35879	0	0	0.075385	0.003614	0.075385	0
ENST00000635383	ENSG00000114331	ACAP2	1.54499	0.007563	0	0.003642	0.000696	0	0.000398	0	0.188228
ENST00000374271	ENSG00000175087	PDIK1L	1.54164	0.066394	0.037858	0.003303	0.112194	0.064058	0.080406	0.064058	0.085152
ENST00000648187	ENSG00000196715	VKORC1L1	1.49575	0.021771	0.02606	0.11223	0.075871	0.19431	0.24347	0.19431	0.084853
ENST00000615507	ENSG00000166295	ANAPC16	1.48678	0.195147	0.179526	0.422313	0	0	0	0	0
ENST00000383329	ENSG00000204525	HLA-C	1.4527	0	0	0	0	0	0	0	0
ENST00000266022	ENSG00000004534	RBM6	1.44056	0.08315	0.036494	0.03467	0.462015	0.010416	0.050766	0.010416	0.067508
ENST00000424834	ENSG00000182957	SPATA13	1.43167	0	0	0	0	0	0	0	0.003583
ENST00000259708	ENSG00000137171	KLC4	1.41997	0.096499	0.286507	0.00255	0	0.056665	0	0.056665	0
ENST00000503407	ENSG00000151726	ACSL1	1.40173	0	0	0.488421	0	0	0	0	0
ENST00000374990	ENSG00000106799	TGFBR1	1.37694	0.011465	0.027121	0.022231	0.136962	0.125852	0.210398	0.125852	0.045495
ENST00000402042	ENSG00000196588	MRTFA	1.37163	0.126269	0	0	0	0.053604	0.125253	0.053604	0.142362
ENST00000265586	ENSG00000114770	ABCC5	1.37155	0	0	0	0.211008	0.583562	0	0.583562	0.001458
ENST00000446501	ENSG00000185024	BRF1	1.36533	0.001958	0.002406	0.001416	0.005817	0.007845	0.004965	0.007845	0.003629
ENST00000305414	ENSG00000129682	FGF13	1.34638	0	0	0	0	4.8e-05	0.001951	4.8e-05	0.003212
ENST00000475977	ENSG00000196998	WDR45	1.29692	3.9e-05	0	0.001274	0.000176	6.2e-05	0.001687	6.2e-05	2.4e-05
ENST00000424999	ENSG00000143398	PIP5K1A	1.28399	0	0	0	0	0	0	0	0
ENST00000543693	ENSG00000147862	NFIB	1.28223	1.7e-05	0.006756	0	0.006502	0.003076	0.48416	0.003076	2.6e-05
ENST00000317829	ENSG00000166025	AMOTL1	1.26406	0.745873	0.027903	0.007299	0.002369	0.000354	0.000416	0.000354	0.004707
ENST00000613760	ENSG00000136918	WDR38	1.23831	0.014153	0.005241	0.016404	0.016103	0.01842	0	0.01842	0
ENST00000409487	ENSG00000169554	ZEB2	1.2023	0.028629	0.012986	0.051628	0.044969	0.050897	0.056348	0.050897	0.05452
ENST00000648884	ENSG00000112541	PDE10A	1.19955	0.001075	0	0.000141	0.064431	0.002788	0.249904	0.002788	0.27352
ENST00000358835	ENSG00000009413	REV3L	1.17838	0.068898	0.040617	0.045962	0.039935	0.031975	0.043623	0.031975	0.089497
ENST00000432020	ENSG00000146701	MDH2	1.17686	0	0	0	0	0	0	0	0
ENST00000646535	ENSG00000185532	PRKG1	1.1367	0.177655	0.079325	0.033231	0.132212	0.082512	0.030929	0.082512	0.008818
ENST00000264546	ENSG00000151474	FRMD4A	1.13197	0	0.002154	0.006674	0.032274	0.003458	0.008744	0.003458	0.000325
ENST00000535035	ENSG00000116133	DHCR24	1.12403	0.001657	0.000656	0	0.000524	0.000715	0.000887	0.000715	0
ENST00000552819	ENSG00000197111	PCBP2	1.12257	0.004686	0.001141	0.003786	0.001327	0.130507	0.026757	0.130507	0.001579
ENST00000369239	ENSG00000132424	PNISR	1.11457	0.053439	0.086325	0.038526	0.06111	0.095115	0.18518	0.095115	0.01895
ENST00000399233	ENSG00000197535	MYO5A	1.10957	0.157154	0.138983	0	0	0.19937	0.000653	0.19937	0.012767
ENST00000296210	ENSG00000163870	TPRA1	1.08708	0	0	0	0	0	0	0	0
ENST00000586370	ENSG00000065000	AP3D1	1.07835	0	0	0	0	0	0	0	0
ENST00000550104	ENSG00000204842	ATXN2	1.06652	0	0	0	0.017921	0.083899	0.124961	0.083899	0.375551
ENST00000647169	ENSG00000163161	ERCC3	1.06282	0	0	0	0	0.136444	0.001013	0.136444	0
ENST00000409663	ENSG00000121210	TMEM131L	1.05682	0.020112	0.2627	0.106559	0.029529	0.039945	0.084301	0.039945	0.036236
ENST00000324677	ENSG00000141298	SSH2	1.05074	0.093162	0.00997	0	0.089166	0.059764	0.02114	0.059764	0.00633
ENST00000652727	ENSG00000140694	PARN	1.04067	0	0	0	0	0	0	0	0
ENST00000583536	ENSG00000161526	SAP30BP	1.02872	0	0	0.058167	0	0.179401	0	0.179401	0.106994
ENST00000423517	ENSG00000186472	PCLO	1.01232	0	0	0	0	0	0	0	0
ENST00000393010	ENSG00000155893	PXYLP1	1.00289	0.029574	0.062543	0	0.044837	0.016041	0.030114	0.016041	0.00593
ENST00000651854	ENSG00000173599	PC	0.995401	0.140003	0.003598	0.005574	0.087292	0.009053	0.009649	0.009053	0.004918
ENST00000524750	ENSG00000085117	CD82	0.982017	0.030901	0	0	0	0.079804	0.164669	0.079804	0.05365
ENST00000585101	ENSG00000171953	ATPAF2	0.981639	0.051119	0	0.13595	0.063196	5.1e-05	0	5.1e-05	0.057402
ENST00000378915	ENSG00000143889	HNRNPLL	0.972514	0	0	0	0	0	0	0	0
ENST00000368797	ENSG00000188690	UROS	0.970109	0	0	0	0	0.056242	0	0.056242	0
ENST00000648078	ENSG00000154059	IMPACT	0.964949	0.042504	0.029799	0.040851	0.069459	0.038347	0.044406	0.038347	0.322625
ENST00000646098	ENSG00000127990	SGCE	0.930624	0	0	0	0	0	0	0	0
ENST00000565905	ENSG00000198826	ARHGAP11A	0.92874	0	0	0	0	0	0	0	0
ENST00000629706	ENSG00000148737	TCF7L2	0.925761	0	0	0	0.228147	0.083224	0	0.083224	0.101181
ENST00000539018	ENSG00000108423	TUBD1	0.910828	0.307991	0	0	0	0	0	0	0
ENST00000440863	ENSG00000140474	ULK3	0.899661	0.000679	0	0.057599	0	0.000446	0	0.000446	0
ENST00000637953	ENSG00000136854	STXBP1	0.892943	0.000634	0	0	0	0	0.000637	0	0
ENST00000327628	ENSG00000182606	TRAK1	0.892113	0	0	0	0.001193	0.019288	0	0.019288	0.002004
ENST00000377065	ENSG00000147124	ZNF41	0.883446	0.019416	0.01836	0.020621	0.183576	0.163837	0	0.163837	0.006854
ENST00000650590	ENSG00000093217	XYLB	0.871298	0.130263	0.032506	0.0126	0.009465	0.019374	0.137243	0.019374	0.016133
ENST00000327268	ENSG00000108932	SLC16A6	0.852887	0	0.004887	0	0.155989	0	0.235782	0	0
ENST00000415906	ENSG00000145012	LPP	0.850875	0.077206	0	0.134184	0	0	0	0	0.067552
ENST00000560626	ENSG00000173517	PEAK1	0.850355	0.005989	0.122207	0.062269	0.007781	0.026766	0.008936	0.026766	0.005036
ENST00000535702	ENSG00000119139	TJP2	0.844514	0	0	0	0.002022	0	0	0	0
ENST00000425278	ENSG00000145332	KLHL8	0.840856	0	0	0	0	0	0	0	0
ENST00000531670	ENSG00000104529	EEF1D	0.837303	0	0.020719	0	0.005781	0	0.028865	0	0.002564
ENST00000530393	ENSG00000166261	ZNF202	0.835601	0.065307	0.071447	0.075956	0.101845	0.009654	0.085639	0.009654	0
ENST00000455213	ENSG00000154328	NEIL2	0.835434	0.017854	0.014552	0.003783	0.009531	0.007259	0.017395	0.007259	0.016193
ENST00000535813	ENSG00000172663	TMEM134	0.814384	0.130611	0	0.04013	0.215758	0.048929	0	0.048929	0
ENST00000548573	ENSG00000066117	SMARCD1	0.811727	0.001843	0.002775	0.103743	0.004652	0.002232	0.008426	0.002232	0.030604
ENST00000589048	ENSG00000187867	PALM3	0.808483	0.088609	0	0	0.077099	0.120608	0.016181	0.120608	0
ENST00000359365	ENSG00000068028	RASSF1	0.797149	0	0	0	0.360991	0	0.161169	0	0
ENST00000422361	ENSG00000079102	RUNX1T1	0.787142	0.045732	0.109362	0.000868	0.042592	0.036915	0.056827	0.036915	0.037893
ENST00000547211	ENSG00000089157	RPLP0	0.786655	0.017312	0	0.010459	0.054963	0.040147	0.027725	0.040147	0
ENST00000504148	ENSG00000150779	TIMM8B	0.783841	1e-06	1.1e-05	0.002844	0	2e-06	1.2e-05	2e-06	1e-06
ENST00000377848	ENSG00000076555	ACACB	0.779255	0	0	0	0	0	0	0	0
ENST00000641820	ENSG00000177000	MTHFR	0.769512	0.002807	0.070392	0.076733	0.004196	0.101843	0.07202	0.101843	0.021741
ENST00000590954	ENSG00000091164	TXNL1	0.764323	0	0.001973	0	0	0	0	0	0
ENST00000338010	ENSG00000161642	ZNF385A	0.759751	0	0	0	0	0	0	0	0
ENST00000611645	ENSG00000151276	MAGI1	0.757247	0.000187	0	1.1e-05	0	0	0.021324	0	0
ENST00000358100	ENSG00000127914	AKAP9	0.739968	0	0	0.111936	0.199076	0	0	0	0
ENST00000417167	ENSG00000136146	MED4	0.736905	0.05683	0.080771	0.003457	0.055836	0.1126	0.040164	0.1126	0.04753
ENST00000397661	ENSG00000008441	NFIX	0.736275	0.051982	0	0	0.05066	0.322872	0	0.322872	0
ENST00000452314	ENSG00000197343	ZNF655	0.728501	2e-05	7.5e-05	0.022512	9e-06	0	2.8e-05	0	2.1e-05
ENST00000396175	ENSG00000182606	TRAK1	0.718251	0	0	0	0	0	0.052214	0	0.025579
ENST00000521891	ENSG00000091656	ZFHX4	0.712319	0.012964	0.013131	0.148801	0.003967	0.007301	0.071771	0.007301	0.016156
ENST00000395292	ENSG00000149187	CELF1	0.70584	0.000639	0.000703	0.008557	0	0.167094	0.038279	0.167094	0
ENST00000570450	ENSG00000141127	PRPSAP2	0.705191	0	0	0	0	0	0	0	0
ENST00000397394	ENSG00000133424	LARGE1	0.700026	0.146057	0.028644	0	0	0	0.167044	0	0
ENST00000483083	ENSG00000080603	SRCAP	0.697756	0.025579	0.026045	0.042897	0.050691	0.074276	0.057073	0.074276	0.010342
ENST00000651014	ENSG00000183735	TBK1	0.691428	0	0	0	0	0.239158	0.04015	0.239158	0.054347
ENST00000378735	ENSG00000131437	KIF3A	0.690013	0	0	0	0	0	0	0	0
ENST00000469640	ENSG00000196730	DAPK1	0.684899	0	0	0	0	0	0	0	0
ENST00000549772	ENSG00000110880	CORO1C	0.683813	0.001582	0	0.004888	0.005774	0.166213	0.006347	0.166213	0
ENST00000651436	ENSG00000160305	DIP2A	0.683775	0.000188	0.120592	0.000262	0.024682	0.000513	0.027637	0.000513	0.036921
ENST00000375415	ENSG00000074964	ARHGEF10L	0.680724	0	0	0	0	0	0	0	0
ENST00000394091	ENSG00000138468	SENP7	0.673983	0	0.25717	0	0	0	0	0	0
ENST00000394092	ENSG00000170365	SMAD1	0.666775	0	0	0	0	0	0	0	0
ENST00000451834	ENSG00000080802	CNOT4	0.66613	0.001232	0	0.016981	0.018733	0.067681	0.134264	0.067681	0.086727
ENST00000382806	ENSG00000012817	KDM5D	0.663657	0	0	0	0	0	0	0	0
ENST00000409173	ENSG00000170417	TMEM182	0.661095	0.084253	0.052145	0	0.031845	0	0.058875	0	0
ENST00000370620	ENSG00000129675	ARHGEF6	0.658843	0.004385	0.008029	0.001482	0.004234	0.001705	0.001814	0.001705	0.004607
ENST00000409242	ENSG00000081177	EXD2	0.656947	0.047134	2.3e-05	0	0.124739	0.000117	0.121845	0.000117	0.096379
ENST00000478836	ENSG00000105948	TTC26	0.643243	0	0	0	0	0	0.116442	0	0.111471
ENST00000503520	ENSG00000061918	GUCY1B1	0.63964	0	0	0	0	0	0	0	0
ENST00000442371	ENSG00000187210	GCNT1	0.629756	0	0.004148	0	0.087436	0.131259	0.070941	0.131259	0
ENST00000574563	ENSG00000141258	SGSM2	0.629611	0	0	0	0	0	0	0	0
ENST00000409853	ENSG00000137478	FCHSD2	0.629288	0.014256	0.045061	0.030223	0	0.020628	0.021883	0.020628	0.019861
ENST00000376138	ENSG00000136754	ABI1	0.624761	0.002952	0.006752	0.01917	0	0.042032	0.002434	0.042032	0.002006
ENST00000511313	ENSG00000285437	POLR2J3	0.609047	0.019874	0.004813	0.005511	0.14072	0.045007	0.082513	0.045007	0.046633
ENST00000442099	ENSG00000071462	BUD23	0.606281	0	0	0	0	0	0	0	0
ENST00000429018	ENSG00000144674	GOLGA4	0.596462	0	0	0	0	0	0	0	0
ENST00000568563	ENSG00000196123	KIAA0895L	0.594394	0	0	0	0	0.213214	0.043018	0.213214	0
ENST00000525531	ENSG00000149591	TAGLN	0.593195	0.031852	0.013303	0.062225	0.031428	0	0.116727	0	0.00238
ENST00000651541	ENSG00000113522	RAD50	0.592108	0	0	0	0	0.007486	0	0.007486	0.008211
ENST00000595548	ENSG00000088247	KHSRP	0.590222	0	0	0	0	0	0	0	0
ENST00000282249	ENSG00000152402	GUCY1A2	0.587887	0	0	0	0	0.006273	0.005089	0.006273	0
ENST00000538164	ENSG00000155974	GRIP1	0.583751	0.099613	0	0	0	0.001088	0	0.001088	0
ENST00000278200	ENSG00000148950	IMMP1L	0.58307	0	0	0	0	0	0	0	0
ENST00000348066	ENSG00000108509	CAMTA2	0.572099	0.01631	0.057851	0.016243	0.025274	0	0.142443	0	0.041876
ENST00000590680	ENSG00000130158	DOCK6	0.569351	0	0.000364	0	0	0.005927	0.002112	0.005927	0.017001
ENST00000491893	ENSG00000196730	DAPK1	0.562229	0	0	0	0	0	0	0	0
ENST00000559209	ENSG00000157450	RNF111	0.543053	0.067363	0.044137	0.04216	0.017583	0.010303	0.015063	0.010303	0.054564
ENST00000437307	ENSG00000129103	SUMF2	0.537525	0	0	0	0	0	0	0	0
ENST00000651634	ENSG00000140694	PARN	0.53524	0	0	0	0	0.216634	0	0.216634	0
ENST00000637657	ENSG00000175198	PCCA	0.533025	0	0	0	0	0	0	0	0
ENST00000303824	ENSG00000104313	EYA1	0.530707	0.001741	0	0	0.016995	0.0168	0	0.0168	0
ENST00000650084	ENSG00000119139	TJP2	0.527728	0	0	0	0	0	0	0	0
ENST00000506044	ENSG00000137177	KIF13A	0.527033	0.091102	0	0	0	0.143097	0	0.143097	0
ENST00000383703	ENSG00000144749	LRIG1	0.526323	0.020074	0.027779	0.011915	0.021239	0.028314	0.035001	0.028314	0.030007
ENST00000648792	ENSG00000120071	KANSL1	0.517002	0	0	0	0	0	0	0	0
ENST00000356010	ENSG00000138834	MAPK8IP3	0.511653	0	0	0	0	0	0	0	0
ENST00000377534	ENSG00000136153	LMO7	0.498114	0	0	0.008332	0	0	0	0	0
ENST00000276141	ENSG00000102362	SYTL4	0.495253	0.002069	0	0	0.001419	0.003083	0	0.003083	0.003955
ENST00000418323	ENSG00000074047	GLI2	0.493621	0	0	0	0.051286	0.051239	0.089962	0.051239	0.005682
ENST00000400228	ENSG00000088387	DOCK9	0.488207	0.136462	0	0	0	0.001572	0.000459	0.001572	0.03293
ENST00000345617	ENSG00000068024	HDAC4	0.484581	0.045967	0.004702	0	0.003458	0.029107	0.143356	0.029107	0.012891
ENST00000545257	ENSG00000148737	TCF7L2	0.483088	0	0	0	0	0	0	0	0.137012
ENST00000273962	ENSG00000145331	TRMT10A	0.480269	0.002966	0.242415	0.003799	9.2e-05	0.002999	0.005238	0.002999	0.004401
ENST00000360089	ENSG00000183853	KIRREL1	0.480201	0.002625	0.075842	0	0.022483	0.099368	0.016889	0.099368	0.015216
ENST00000431054	ENSG00000072682	P4HA2	0.479457	0	0.024203	0	0	0	0	0	0
ENST00000382004	ENSG00000080298	RFX3	0.475937	0.085075	0.070327	0.027439	0.038117	0	0	0	0
ENST00000302008	ENSG00000114026	OGG1	0.47529	0.077872	0.034073	0	0	0.010261	0.098876	0.010261	0.007523
ENST00000437353	ENSG00000114648	KLHL18	0.475092	6.6e-05	6.4e-05	5.2e-05	6.3e-05	4.9e-05	6.1e-05	4.9e-05	5.3e-05
ENST00000393300	ENSG00000116774	OLFML3	0.471395	0.023578	0.193586	0.023814	0.026839	0	0	0	0
ENST00000579632	ENSG00000108465	CDK5RAP3	0.466271	0	0	0	0	0	0	0	0
ENST00000378680	ENSG00000198947	DMD	0.45411	0	0	0	0	0	0	0	0
ENST00000617047	ENSG00000162775	RBM15	0.453157	0.001053	0.014443	0.004765	0.010048	0.006757	0.008053	0.006757	0.031664
ENST00000567336	ENSG00000138621	PPCDC	0.447832	0.12162	0	0	0	0	0	0	0
ENST00000640413	ENSG00000177879	AP3S1	0.44674	0	0	0	0	0	0	0	0
ENST00000418791	ENSG00000144445	KANSL1L	0.445627	0	0	0	0	0	0	0	0
ENST00000465261	ENSG00000136153	LMO7	0.443102	0.024614	0	0.000719	0.006669	0.092537	0.009723	0.092537	0.079732
ENST00000636714	ENSG00000239900	ADSL	0.436295	0	0	0	0	0.149887	0	0.149887	0
ENST00000356206	ENSG00000197217	ENTPD4	0.427668	0.272957	0	0	0	0	0	0	0
ENST00000436026	ENSG00000204371	EHMT2	0.422861	0	0	0	0	0	0.078905	0	0.130965
ENST00000450957	ENSG00000136715	SAP130	0.419565	0.031005	0	0.00389	0.071153	0	0.045058	0	0.00132
ENST00000518614	ENSG00000096872	IFT74	0.419258	0	0	0	0.009785	0.005886	0	0.005886	0
ENST00000566753	ENSG00000104164	BLOC1S6	0.417928	0.083344	0.02879	0	3e-06	0	0.007549	0	0
ENST00000440077	ENSG00000012817	KDM5D	0.415198	0	0	0	0	0	0	0	0.070466
ENST00000591674	ENSG00000130165	ELOF1	0.411942	0.007208	0.000864	0.137964	0.00405	0.026564	0.00318	0.026564	0.005495
ENST00000458508	ENSG00000090924	PLEKHG2	0.410189	0.150513	0.009795	0	0	0.015259	0	0.015259	0.003914
ENST00000367571	ENSG00000118495	PLAGL1	0.408974	0.026707	0.002142	0.01458	0.002725	0.002118	0.00358	0.002118	0.002749
ENST00000402934	ENSG00000049323	LTBP1	0.408671	0.064756	0	0	0	0	0	0	0
ENST00000430736	ENSG00000015568	RGPD5	0.407345	0.099665	0	0.027645	0.032378	0	0.044219	0	0
ENST00000507173	ENSG00000143322	ABL2	0.40712	0	0	0.022302	0.033242	0.030513	0.042191	0.030513	0.029183
ENST00000643665	ENSG00000127124	HIVEP3	0.400393	0.005746	0	0.001781	0.003797	0.041601	0.006704	0.041601	0.006324
ENST00000536344	ENSG00000110171	TRIM3	0.39541	0	0.010321	0.009265	0.0188	0.046915	0.029554	0.046915	0.01858
ENST00000339998	ENSG00000141644	MBD1	0.395056	0	0	0	0	0	0.066599	0	0
ENST00000352178	ENSG00000160200	CBS	0.39106	0	0	0	0	0.186169	0	0.186169	0
ENST00000406686	ENSG00000137266	SLC22A23	0.387115	0	0.065466	0	0	0.042822	0	0.042822	0
ENST00000346623	ENSG00000184254	ALDH1A3	0.386981	0	0	0	0.11109	0	0	0	0
ENST00000462866	ENSG00000143224	PPOX	0.386682	0.038173	0	0	0.073019	0	0	0	0.038233
ENST00000369066	ENSG00000112297	CRYBG1	0.375305	0	0	0	0	0	0	0	0
ENST00000267978	ENSG00000140400	MAN2C1	0.372079	0.009118	0.002019	0.024278	0.007706	0.002715	0.001464	0.002715	0.094421
ENST00000503258	ENSG00000113448	PDE4D	0.371128	0	0.006462	0	0.006408	0.002593	0.005405	0.002593	0.007524
ENST00000639879	ENSG00000243335	KCTD7	0.36533	0.011657	0.002703	0.008675	0.007769	0.04421	0.007715	0.04421	0.067777
ENST00000278302	ENSG00000121236	TRIM6	0.364245	0	0	0	0.056981	0.043245	0	0.043245	0.134115
ENST00000412423	ENSG00000283154	IQCJ-SCHIP1	0.363994	0	0	0	0	0	0	0	0
ENST00000612482	ENSG00000198911	SREBF2	0.359066	0.007179	0.010565	0.005786	0.010374	0.005573	0.066916	0.005573	0.013903
ENST00000316364	ENSG00000137872	SEMA6D	0.356731	0	0.040747	0	0	0	0	0	0
ENST00000416436	ENSG00000145979	TBC1D7	0.351784	0	0	0	0	0.030479	0.049886	0.030479	0.030175
ENST00000616533	ENSG00000086666	ZFAND6	0.349491	0.015356	0	0	0	0.062206	0	0.062206	0.068112
ENST00000561603	ENSG00000103932	RPAP1	0.346218	0	0	0	0	0.084638	0	0.084638	0
ENST00000649134	ENSG00000119139	TJP2	0.334068	0	0	0	0	0	0	0	0
ENST00000372163	ENSG00000172426	RSPH9	0.333812	0	0	0	0	0	0.007251	0	0
ENST00000524380	ENSG00000135362	PRR5L	0.332629	0	0	0	0	0	0	0	0
ENST00000537989	ENSG00000112182	BACH2	0.330957	0	0	0	0	0.00568	0	0.00568	0.108614
ENST00000430193	ENSG00000104835	SARS2	0.327492	0.203717	0	0	0	0	0	0	0
ENST00000581698	ENSG00000171953	ATPAF2	0.324588	0	0.192527	0	0	0	0	0	0
ENST00000381867	ENSG00000101298	SNPH	0.323212	0.002032	0	0.029891	0	0.001635	3e-06	0.001635	0
ENST00000344646	ENSG00000172671	ZFAND4	0.320028	0.026801	0	0	0	0.024425	0.048522	0.024425	0
ENST00000650099	ENSG00000134371	CDC73	0.318844	0.049873	0.011672	0.00268	0.005567	0.002157	0.019537	0.002157	0.012801
ENST00000371241	ENSG00000095637	SORBS1	0.318176	0.209456	0	0	0	0	0	0	0
ENST00000373710	ENSG00000168528	SERINC2	0.317577	0	0	0	0	0	0	0	0
ENST00000490843	ENSG00000158796	DEDD	0.317484	0	0.036981	0	0	0.032065	0.063472	0.032065	0
ENST00000517361	ENSG00000169946	ZFPM2	0.317464	0	0.003532	0	0	0.002164	0	0.002164	0
ENST00000550358	ENSG00000127329	PTPRB	0.317183	0	0	0	0.003904	0	0	0	0
ENST00000643043	ENSG00000147044	CASK	0.316909	8.7e-05	1.1e-05	0.00143	0.000209	0.00053	0.146923	0.00053	0.000447
ENST00000536708	ENSG00000108465	CDK5RAP3	0.316806	0.079499	0	0.117568	0	0	0	0	0
ENST00000567887	ENSG00000127603	MACF1	0.314553	0	0	0	0	0	0	0	0
ENST00000428046	ENSG00000168803	ADAL	0.313916	0	0.006064	0	0.061204	0.032523	0	0.032523	0.043627
ENST00000361923	ENSG00000049246	PER3	0.313255	0	0.001274	0.001188	0.012934	0.022445	0	0.022445	0
ENST00000503291	ENSG00000158985	CDC42SE2	0.312128	0.019835	0.006325	0.014862	0	0.06286	0.042711	0.06286	0.014464
ENST00000552432	ENSG00000118596	SLC16A7	0.311337	0	0	0	0	0	0	0	0
ENST00000588371	ENSG00000188283	ZNF383	0.310557	0.018083	0	0	0.027385	0.025103	0.012062	0.025103	0
ENST00000576263	ENSG00000124813	RUNX2	0.309965	0	0	0	0	0	0	0	0
ENST00000394439	ENSG00000138735	PDE5A	0.30781	9.2e-05	0.118374	0	0.068933	0.000298	0.006409	0.000298	5.9e-05
ENST00000392482	ENSG00000111907	TPD52L1	0.305818	0	0	0	0	0	0.190402	0	0
ENST00000380249	ENSG00000188352	FOCAD	0.30471	0	0.077365	0.000644	0	4.1e-05	0	4.1e-05	0.000451
ENST00000589113	ENSG00000189050	RNFT1	0.302347	0	0	0	0	0	0	0	0
ENST00000359540	ENSG00000186716	BCR	0.297458	0	0	0	0	0	0	0	0
ENST00000553892	ENSG00000174373	RALGAPA1	0.28868	0	0	0	0	0	0	0	0
ENST00000431456	ENSG00000150773	PIH1D2	0.288404	0	0.01047	0	0	0	0.05128	0	0
ENST00000356764	ENSG00000077157	PPP1R12B	0.282593	0	0	0	0	0	0	0	0
ENST00000588787	ENSG00000197256	KANK2	0.279351	0	0	0	0	0	0	0	0
ENST00000318100	ENSG00000258366	RTEL1	0.277565	0	0	0	0	0.106773	0	0.106773	0
ENST00000375169	ENSG00000196632	WNK3	0.272953	0.072625	0.011044	0	0.003778	0.003595	0.048832	0.003595	0.008726
ENST00000443462	ENSG00000138674	SEC31A	0.272791	0	0	0.070434	0	0	0.008617	0	0.050872
ENST00000448492	ENSG00000159873	CCDC117	0.272177	0	9e-06	0.049673	0	0.011228	0.038413	0.011228	0.03625
ENST00000418808	ENSG00000144580	CNOT9	0.271849	0	0	0	0	0	0	0	0
ENST00000417728	ENSG00000119383	PTPA	0.269186	0	0	0	0	0	0	0	0.120955
ENST00000487553	ENSG00000163539	CLASP2	0.265144	0	0	0	0	0	0.173663	0	0
ENST00000329463	ENSG00000174953	DHX36	0.264495	0	0	0.127871	0	0	0	0	0
ENST00000401917	ENSG00000169760	NLGN1	0.264357	0	0	0	0.007522	0	0	0	0.128561
ENST00000534903	ENSG00000169246	NPIPB3	0.263449	0	0	0	0	0	0	0	0
ENST00000274542	ENSG00000145860	RNF145	0.262503	0	0	0	0.001074	0.017894	0	0.017894	0
ENST00000446731	ENSG00000174099	MSRB3	0.259778	0.009097	0.003105	0.045414	0	0	0	0	0.030114
ENST00000639958	ENSG00000139174	PRICKLE1	0.258716	0	0	0	0.045073	0	0.044053	0	0.01999
ENST00000496383	ENSG00000134313	KIDINS220	0.256223	0	0	0	0	0	0	0	0
ENST00000612742	ENSG00000123600	METTL8	0.25524	0.001056	0.000969	0.004605	0.004805	0.028813	0.004526	0.028813	0.024619
ENST00000642955	ENSG00000188517	COL25A1	0.254277	1.9e-05	0.025178	8.4e-05	0.042566	0.034405	0.022184	0.034405	0.006271
ENST00000411826	ENSG00000249853	HS3ST5	0.251312	0.010202	0.022732	0	0	0.027877	0.00246	0.027877	0.022009
ENST00000312957	ENSG00000154721	JAM2	0.251123	0	0	0	0	0	0	0	0
ENST00000370668	ENSG00000203943	SAMD13	0.249907	0	0	0	0	0	0.000891	0	0.00012
ENST00000366644	ENSG00000010072	SPRTN	0.248946	0.009352	0.004175	0.002629	0.002089	0.00983	0.014263	0.00983	0.016018
ENST00000358577	ENSG00000135596	MICAL1	0.244845	0	0.057275	0	0	0.039042	0.058915	0.039042	0
ENST00000534400	ENSG00000096070	BRPF3	0.244449	0	0	0.031695	0.039076	0.075607	0	0.075607	0
ENST00000438307	ENSG00000170445	HARS	0.24415	0	0	0	0.000656	0.00125	0	0.00125	0
ENST00000591083	ENSG00000074657	ZNF532	0.242602	0	0	0	0	0	0	0	0
ENST00000439209	ENSG00000284922	AP000812.5	0.24177	0	0.046153	0	0	0	0	0	0
ENST00000543878	ENSG00000153157	SYCP2L	0.238677	0	0	0.077451	0	0	0.032567	0	0
ENST00000616902	ENSG00000153208	MERTK	0.238573	0.000708	0.000594	0.000571	0	0.014609	0.018435	0.014609	0.012031
ENST00000519637	ENSG00000171320	ESCO2	0.235452	0.017235	0.038539	0.024354	0.015981	0.01144	0	0.01144	0
ENST00000423738	ENSG00000196440	ARMCX4	0.234187	0.037078	0.04727	0.011493	0	0	0	0	0
ENST00000515783	ENSG00000163913	IFT122	0.23219	0	0	0.084593	0	0	0	0	0
ENST00000349460	ENSG00000159023	EPB41	0.230116	0	0.00712	0	0	0	0	0	0.068293
ENST00000542447	ENSG00000182985	CADM1	0.229965	0.001959	0.001587	0.00168	0.003147	0	0.005675	0	0.002983
ENST00000256186	ENSG00000133816	MICAL2	0.227982	0.009716	0	0	0	0	0	0	0
ENST00000471058	ENSG00000214021	TTLL3	0.224731	0	0	0	0.090369	0	0	0	0
ENST00000530500	ENSG00000175224	ATG13	0.223677	0.061491	0	0	0	0.041037	0	0.041037	0
ENST00000440209	ENSG00000001631	KRIT1	0.223396	0	0	0	0	0.072616	0	0.072616	0
ENST00000507295	ENSG00000151726	ACSL1	0.221524	0	0	0	0	0	0	0	0
ENST00000366658	ENSG00000173409	ARV1	0.221008	0	0	0	0	0	0	0	0.061508
ENST00000565683	ENSG00000140400	MAN2C1	0.21908	0.045127	0.031022	0	0	0	0	0	0
ENST00000273395	ENSG00000144857	BOC	0.218901	0.004422	0	0.007165	0.067445	0	0	0	0
ENST00000406205	ENSG00000112137	PHACTR1	0.218507	0.04666	0.001039	0	0	0.001931	0.009008	0.001931	0.018589
ENST00000467801	ENSG00000204564	C6orf136	0.217205	0	0	0	0	0	0	0	0
ENST00000627717	ENSG00000081189	MEF2C	0.216489	0	0	0	0	0	0	0	0
ENST00000563584	ENSG00000103855	CD276	0.2137	0.012049	0.000305	0	0.012823	0	0.010881	0	0.002949
ENST00000397997	ENSG00000166225	FRS2	0.213546	0.000242	0	0.100152	0	0	0	0	6.9e-05
ENST00000361234	ENSG00000170633	RNF34	0.213099	0.003301	0.022009	0.002407	0.018926	0	0.002307	0	1e-06
ENST00000454754	ENSG00000099991	CABIN1	0.210915	0	0	0.003027	0	0.006567	0	0.006567	0.00355
ENST00000538149	ENSG00000099968	BCL2L13	0.208863	0	0	0	0	0	0.019072	0	0.109324
ENST00000436898	ENSG00000180881	CAPS2	0.207732	0	0	0	0	0	0	0	0.04727
ENST00000373941	ENSG00000088367	EPB41L1	0.202224	0	0	0.001439	0	0	0	0	0
ENST00000578221	ENSG00000154059	IMPACT	0.201341	0	0	0	0	0	0	0	0
ENST00000549500	ENSG00000179715	PCED1B	0.196107	0	0	0	0	0	0.010283	0	0
ENST00000378323	ENSG00000149131	SERPING1	0.196098	0	0	0	0	0.024807	0	0.024807	0.028637
ENST00000588637	ENSG00000153885	KCTD15	0.187975	0	0.077478	0	0	0	0	0	0
ENST00000527311	ENSG00000131238	PPT1	0.186153	0	0	0	0	0	0	0	0.031876
ENST00000400309	ENSG00000183570	PCBP3	0.186113	0	0	0	0	0	0	0	0
ENST00000507779	ENSG00000170469	SPATA24	0.185999	0	0	0	0	0	0	0	0
ENST00000318266	ENSG00000132670	PTPRA	0.1842	0.005177	0.000983	0	0	0.004947	0.002018	0.004947	0.000712
ENST00000535697	ENSG00000187391	MAGI2	0.184076	0	0	0	0	0	0	0	0
ENST00000579284	ENSG00000166484	MAPK7	0.183667	0	0	0	0	0	0	0	0
ENST00000265654	ENSG00000110427	KIAA1549L	0.182852	0.002077	0.006544	0.00834	0.00151	0	0	0	0.024963
ENST00000325942	ENSG00000138759	FRAS1	0.182145	0	0	0.000227	0.001292	0	0	0	0.001005
ENST00000421593	ENSG00000205754	SLCO1B7	0.180539	0	0	0	0	0	0	0	0
ENST00000396199	ENSG00000132122	SPATA6	0.180006	0.060752	0	0.020996	0	0	0	0	0.037269
ENST00000398016	ENSG00000155974	GRIP1	0.179858	0	0	0	0.003322	0.00976	0	0.00976	0.002783
ENST00000428742	ENSG00000038532	CLEC16A	0.179853	0	0	0	0	0	0	0	0.031336
ENST00000251127	ENSG00000102452	NALCN	0.179414	0	0	0	0	0	0	0	0
ENST00000360366	ENSG00000146426	TIAM2	0.177891	0	0	0	0.010016	0.027313	0	0.027313	0.000205
ENST00000428629	ENSG00000099917	MED15	0.177342	0	0	0	0.030238	0.043449	0	0.043449	0
ENST00000505342	ENSG00000145362	ANK2	0.173968	0	0	0	0	0.01935	0	0.01935	0.005076
ENST00000426649	ENSG00000074582	BCS1L	0.172341	0	0	0.000226	0	0.093492	0.000104	0.093492	0
ENST00000561212	ENSG00000148516	ZEB1	0.171354	0	0	0	0	0	0	0	0
ENST00000528498	ENSG00000137710	RDX	0.168364	0	0	0	0	0	0	0	0
ENST00000576019	ENSG00000141252	VPS53	0.168301	0.003501	0	0	0	0.002541	0	0.002541	0
ENST00000409083	ENSG00000181350	LRRC75A	0.163907	0.002345	0	0	0	0.013716	0.023961	0.013716	0
ENST00000287771	ENSG00000157110	RBPMS	0.162735	0.001171	0.019649	0.001413	0.002513	0.010155	0.001969	0.010155	0.005262
ENST00000612372	ENSG00000277149	TYW1B	0.162452	0	0	0	0	0	0.004552	0	0
ENST00000392599	ENSG00000123600	METTL8	0.162057	0	0	0	0	0	0	0	0
ENST00000521755	ENSG00000006837	CDKL3	0.161472	0.096371	0	0	0	0	0	0	0
ENST00000373389	ENSG00000156639	ZFAND3	0.161331	0	0	0	0.036689	0.033851	0	0.033851	0
ENST00000270364	ENSG00000142330	CAPN10	0.160925	0	0.004245	0.007834	0.005815	0.005644	0.013253	0.005644	0
ENST00000552371	ENSG00000166986	MARS	0.160345	0	0	0.053647	0	0	0	0	0
ENST00000396563	ENSG00000185404	SP140L	0.159759	0.017976	0	0	0	0	0	0	0
ENST00000438563	ENSG00000144445	KANSL1L	0.159513	0.00233	0.037992	0.000607	0.000579	0.006447	0.001469	0.006447	0.00277
ENST00000315764	ENSG00000161996	WDR90	0.159379	0	0	0	0	0	0	0	0
ENST00000368399	ENSG00000179085	DPM3	0.157447	0.001897	0.005652	0.001892	0.001738	0.0021	0.009205	0.0021	0.004585
ENST00000601719	ENSG00000186812	ZNF397	0.157007	0	0	0	0	0	0	0	0
ENST00000532589	ENSG00000165490	DDIAS	0.156981	0	0	0	0	0	0	0	0
ENST00000648752	ENSG00000149260	CAPN5	0.15523	0	0	0	0	0	0	0	0
ENST00000638187	ENSG00000084093	REST	0.15489	0.005148	0.00324	0	0.003146	0.001327	0.00206	0.001327	0.046686
ENST00000634706	ENSG00000080503	SMARCA2	0.153533	0	0	0	0	0	0	0	0
ENST00000275358	ENSG00000146530	VWDE	0.153416	0	0	0	0	0	0.003872	0	0
ENST00000445105	ENSG00000114279	FGF12	0.152349	0.001916	0	0.0016	0	0	0	0	0.000195
ENST00000382862	ENSG00000102854	MSLN	0.149779	0	0.002778	0	0	0.013672	0	0.013672	0
ENST00000560721	ENSG00000148516	ZEB1	0.149485	0	0	0	0	0	0	0	0
ENST00000433112	ENSG00000163449	TMEM169	0.149268	0	0	0	0	0.025714	0.010167	0.025714	0.037334
ENST00000542074	ENSG00000167985	SDHAF2	0.149239	0	0.004	0.005725	0.008689	0.002846	0.032459	0.002846	1e-05
ENST00000650713	ENSG00000126088	UROD	0.14902	0	0	0	0	0	0	0	0
ENST00000405808	ENSG00000138081	FBXO11	0.148315	0.002702	0.022238	0.002436	0.002917	0	0	0	0
ENST00000477535	ENSG00000128604	IRF5	0.147301	0	0	0	0	0	0	0	0
ENST00000513355	ENSG00000183354	KIAA2026	0.147096	0	0	0	0	0	0	0	0
ENST00000442944	ENSG00000256269	HMBS	0.146038	0	0	0	0	0	0	0	0.076242
ENST00000502796	ENSG00000145526	CDH18	0.144954	0	0	0	0	0	0	0	0
ENST00000393243	ENSG00000131149	GSE1	0.144458	0	0.021245	0	0.059475	0	0	0	0
ENST00000573085	ENSG00000121057	AKAP1	0.144157	0.092516	0	0	0	0	0	0	0
ENST00000509277	ENSG00000064042	LIMCH1	0.144141	0	0	0	0	0.015353	0	0.015353	0
ENST00000647500	ENSG00000073910	FRY	0.143113	0.000546	0	0.013915	0	0	0.029329	0	0.049849
ENST00000322475	ENSG00000150510	FAM124A	0.142995	0.023408	0.003882	0	0.005275	0.017137	0.014718	0.017137	0.007517
ENST00000648564	ENSG00000150995	ITPR1	0.139936	0	0	0	0	0	0	0	0
ENST00000602296	ENSG00000251503	CENPS-CORT	0.139165	0	0	0	0	0.058906	0	0.058906	0
ENST00000603808	ENSG00000206561	COLQ	0.138765	0	0	0	0	0	0	0	0
ENST00000402064	ENSG00000184381	PLA2G6	0.138395	0	0.010701	0	0	0	0	0	0.016834
ENST00000355385	ENSG00000144857	BOC	0.136544	0	0.001683	0	0	0	0	0	0.035775
ENST00000506515	ENSG00000148634	HERC4	0.136524	0	0	0	0	0	0	0	0
ENST00000409908	ENSG00000014641	MDH1	0.135403	0	0	0	0	0	0	0	0
ENST00000352451	ENSG00000168530	MYL1	0.135153	0.008485	0	0.003184	0	0.000401	0.061978	0.000401	0.004714
ENST00000543854	ENSG00000157837	SPPL3	0.133284	0	0	0	0	0	0	0	0
ENST00000651358	ENSG00000164970	FAM219A	0.131717	0.000918	0.000909	0.000787	0.00161	0.005295	0.013332	0.005295	0.00099
ENST00000635957	ENSG00000049618	ARID1B	0.125865	0	0	0	0	0.008067	0	0.008067	0
ENST00000482020	ENSG00000162599	NFIA	0.125752	0.032082	0	0	0	0	0	0	0.010478
ENST00000647859	ENSG00000147099	HDAC8	0.125494	0	0	0	0.031878	0	0.007492	0	0.018122
ENST00000478844	ENSG00000107249	GLIS3	0.125372	0	0	0	0	0	0	0	0.025749
ENST00000335712	ENSG00000119866	BCL11A	0.123039	0	0	0	0.040594	0	0	0	0
ENST00000534127	ENSG00000166444	ST5	0.122522	0	0.000664	0	0	0.003133	0.000694	0.003133	0.000254
ENST00000284648	ENSG00000170909	OSCAR	0.122082	0	0.003913	0	0	0.000243	0	0.000243	0
ENST00000647594	ENSG00000147099	HDAC8	0.122051	0.001235	0	0.020176	0	0	0	0	0
ENST00000513091	ENSG00000164292	RHOBTB3	0.121722	0	0.011626	0	0	0.041745	0	0.041745	0
ENST00000554230	ENSG00000100522	GNPNAT1	0.118935	0	0	0	0	0	0	0	0
ENST00000422491	ENSG00000166348	USP54	0.117241	0	0	0	0	0	0.062378	0	0
ENST00000639578	ENSG00000007866	TEAD3	0.117084	0	0.008715	0	0	0	0	0	0
ENST00000394973	ENSG00000171126	KCNG3	0.117007	0	0	0	0	0.038016	0	0.038016	0
ENST00000331302	ENSG00000181031	RPH3AL	0.115492	0	0.000123	0.005147	0.009421	0	0.03546	0	0
ENST00000565264	ENSG00000169375	SIN3A	0.114832	0	0	0	0.011119	0.022417	0	0.022417	0
ENST00000427410	ENSG00000066136	NFYC	0.114625	0	0	0	0	0	0	0	0
ENST00000309608	ENSG00000145002	FAM86B2	0.113208	0.001122	0	0	0	0.05974	0	0.05974	0
ENST00000379089	ENSG00000164970	FAM219A	0.112207	0.000334	0.002267	0.000795	0.000381	0.001166	0.007449	0.001166	0.026178
ENST00000349051	ENSG00000166321	NUDT13	0.110711	0.058106	0	0	0	0	0	0	0
ENST00000382285	ENSG00000125841	NRSN2	0.109397	0	0.020359	0.008217	0.00062	0	0	0	1e-06
ENST00000528193	ENSG00000111907	TPD52L1	0.108521	0	0	0	0	0	0	0	0
ENST00000565970	ENSG00000140386	SCAPER	0.108439	0	0	0	0.006163	0.00171	0.01413	0.00171	0
ENST00000416823	ENSG00000185340	GAS2L1	0.107618	0	0	0	0	0.026781	0	0.026781	0.017234
ENST00000618415	ENSG00000143248	RGS5	0.107542	0	0	0	0	0	0	0	0
ENST00000454623	ENSG00000105976	MET	0.106988	0	0	0	0	0	0	0	0
ENST00000636934	ENSG00000182372	CLN8	0.106699	0	0	0	0.00785	0	0.026977	0	0.004267
ENST00000513134	ENSG00000198498	TMA16	0.106446	0	0	0	0	0	0	0	0
ENST00000554192	ENSG00000142208	AKT1	0.106059	0.055637	0	0	0	0	0	0	0
ENST00000629359	ENSG00000187391	MAGI2	0.105484	0	0	0	0	0	0	0	0
ENST00000543172	ENSG00000155974	GRIP1	0.103196	0	0	0	0	0	0	0	0
ENST00000370320	ENSG00000166136	NDUFB8	0.102718	0	0	0	0.042967	0	0	0	0
ENST00000550847	ENSG00000127328	RAB3IP	0.102556	0	0	0	0	0	0	0	0
ENST00000651689	ENSG00000169255	B3GALNT1	0.100624	0	0	0	0	0	0	0	0
ENST00000642439	ENSG00000119866	BCL11A	0.100613	0	0	0	0.015776	0	0	0	0
ENST00000422536	ENSG00000101079	NDRG3	0.100196	0	0.054616	0	0	0	0.009835	0	0
ENST00000581639	ENSG00000141337	ARSG	0.098559	0.008392	0.001766	0.007267	0.009678	0.005634	0.005156	0.005634	0.010038
ENST00000581348	ENSG00000108262	GIT1	0.097766	0	0	0	0	0	0	0	0
ENST00000571457	ENSG00000176108	CHMP6	0.097301	0	0	0	0	0	0.049354	0	0
ENST00000636432	ENSG00000147862	NFIB	0.096814	0	0	0	0	0	0.042571	0	0
ENST00000373387	ENSG00000136895	GARNL3	0.096469	0	0	0	0	0	0.06117	0	0.001832
ENST00000376354	ENSG00000125246	CLYBL	0.096344	0	0	0	0	0	0	0	0
ENST00000552706	ENSG00000111271	ACAD10	0.096021	0	0	0	0.024744	0	0	0	0
ENST00000567285	ENSG00000125107	CNOT1	0.095961	0	0	0	0	0	0	0	0.033899
ENST00000451827	ENSG00000112419	PHACTR2	0.095456	0	0	0	0	0	0	0	0
ENST00000597801	ENSG00000142552	RCN3	0.095403	0	0	0	0	0	0.055685	0	0
ENST00000546411	ENSG00000257923	CUX1	0.09499	0	0	0	0	0	0	0	0
ENST00000504641	ENSG00000164331	ANKRA2	0.094817	0	0	0	0	0	0	0	0
ENST00000371820	ENSG00000130635	COL5A1	0.093239	0.003478	9.2e-05	0.001592	3.7e-05	0.015816	0.001973	0.015816	0.001572
ENST00000296333	ENSG00000163964	PIGX	0.093065	0.009394	0.0079	0.007685	0.007491	0.003498	0	0.003498	0
ENST00000644512	ENSG00000115355	CCDC88A	0.092836	0	0.024129	0	0.012768	0	0.019646	0	0
ENST00000439356	ENSG00000047849	MAP4	0.092643	0	0	0	0	0	0	0	0
ENST00000530885	ENSG00000166313	APBB1	0.092418	0	0	0	0	0	0	0	0
ENST00000639486	ENSG00000156113	KCNMA1	0.092339	0	0	0	0	0.013615	0	0.013615	0
ENST00000525591	ENSG00000130270	ATP8B3	0.092065	0.003552	0.0215	0.004237	0.020129	0	0	0	0
ENST00000307671	ENSG00000166377	ATP9B	0.090875	0	0	0.02544	0	0.02504	0.004942	0.02504	0
ENST00000639695	ENSG00000035928	RFC1	0.090358	0.011402	0.010752	0.005846	0.005564	0.004589	0	0.004589	0.011155
ENST00000549221	ENSG00000062485	CS	0.089899	0	0	0	0	0	0.004625	0	0.029724
ENST00000480676	ENSG00000162923	WDR26	0.08949	0	0	0	0	0	0	0	0
ENST00000590503	ENSG00000188283	ZNF383	0.089314	0	0	0	0	0	0	0	0
ENST00000646240	ENSG00000101310	SEC23B	0.088803	0	0	0	0	0	0	0	0
ENST00000522270	ENSG00000132561	MATN2	0.088288	0	0.005064	0	0	0.019954	0.007403	0.019954	0.020155
ENST00000646107	ENSG00000215301	DDX3X	0.088193	0	0.010972	0	0	0	0.016208	0	0.003136
ENST00000319176	ENSG00000135119	RNFT2	0.087075	0.005438	0.001163	0.000773	0.001781	0.002565	0.003405	0.002565	0.014795
ENST00000580550	ENSG00000072210	ALDH3A2	0.086589	0	0	0.025823	0	0	0	0	0
ENST00000608950	ENSG00000130518	IQCN	0.086454	0	0	0	0	0	0	0	0
ENST00000377854	ENSG00000076555	ACACB	0.086435	0	0	0	0.000387	0.000334	0	0.000334	0
ENST00000406961	ENSG00000084676	NCOA1	0.086411	0	0	0	2.7e-05	0	0	0	0.013289
ENST00000642563	ENSG00000115355	CCDC88A	0.086096	0	0.012566	0	0	0	0.016468	0	0.023386
ENST00000548673	ENSG00000135127	BICDL1	0.085242	0	0	0.000426	0	0.005852	0.001034	0.005852	0.000498
ENST00000507367	ENSG00000170365	SMAD1	0.084089	0.003399	0	0	0	0	0	0	0
ENST00000395098	ENSG00000122958	VPS26A	0.083217	0	0	1.1e-05	1.2e-05	1e-05	0	1e-05	0
ENST00000610595	ENSG00000128271	ADORA2A	0.08306	0	0	0	0	0	0	0	0
ENST00000652737	ENSG00000134250	NOTCH2	0.083059	0	0.025035	0	0	0	0.025992	0	0
ENST00000409572	ENSG00000153234	NR4A2	0.082913	0	0	0	0.040997	0	0	0	0
ENST00000480589	ENSG00000196428	TSC22D2	0.082861	0	0	0	0	0	0	0	0
ENST00000417865	ENSG00000115998	C2orf42	0.082835	1.3e-05	0	0	0	0	0	0	0
ENST00000512813	ENSG00000109572	CLCN3	0.082656	0	0	0	0	0	0	0	0.049518
ENST00000399182	ENSG00000171962	DRC3	0.082027	0	0	0	0	0	0	0	0
ENST00000637557	ENSG00000131089	ARHGEF9	0.081614	0	0.000567	0	0	5.7e-05	0.00108	5.7e-05	0.000191
ENST00000420794	ENSG00000176697	BDNF	0.081248	0	0	0	0	0.030216	0	0.030216	0
ENST00000455443	ENSG00000106624	AEBP1	0.081104	0	0	0	0	0	0	0	0
ENST00000295706	ENSG00000143847	PPFIA4	0.080317	0	0	0	0.004363	0.000552	0	0.000552	0.007063
ENST00000547650	ENSG00000076108	BAZ2A	0.080027	0	0	0	0	0	0	0	0
ENST00000583990	ENSG00000171634	BPTF	0.079625	0	0	0	0	0	0	0	0
ENST00000513531	ENSG00000138741	TRPC3	0.079438	0	0	0	0	0	0	0	0
ENST00000542223	ENSG00000186642	PDE2A	0.079361	0	0	0	0	0	0	0	0.002643
ENST00000556871	ENSG00000012963	UBR7	0.079236	0	0	0	0	0	0	0	0
ENST00000587065	ENSG00000126249	PDCD2L	0.079022	0	0	0	0	0	0	0	0
ENST00000583527	ENSG00000176390	CRLF3	0.078819	0	0	0	0	0	0	0	0
ENST00000409425	ENSG00000151164	RAD9B	0.077944	0.00366	0.009248	0	0	0	0	0	0.018257
ENST00000488699	ENSG00000139737	SLAIN1	0.077805	0	0	0	0	0	0	0	0
ENST00000372714	ENSG00000156650	KAT6B	0.077478	0	0	0	0	0.003275	0	0.003275	0
ENST00000525776	ENSG00000142082	SIRT3	0.076821	0.020972	0.003562	0.000192	0.001886	0.01499	0.000177	0.01499	6.9e-05
ENST00000560861	ENSG00000028528	SNX1	0.076791	0.047761	0	0	0	0	0	0	0
ENST00000645186	ENSG00000103197	TSC2	0.075758	0	0	0	0	0	0	0	0
ENST00000458034	ENSG00000080298	RFX3	0.075079	0.006526	0	0	0	0.002034	0.00665	0.002034	0.002369
ENST00000371438	ENSG00000124813	RUNX2	0.074773	0	0	0	0	0	0	0	0
ENST00000530507	ENSG00000143248	RGS5	0.074681	0	0	0	0	0	0	0	0.035732
ENST00000397748	ENSG00000160282	FTCD	0.074471	0	0	0	0.026351	0	0	0	0
ENST00000417841	ENSG00000164054	SHISA5	0.07444	0	0.011002	0	0	7.1e-05	0.000292	7.1e-05	0.003514
ENST00000617418	ENSG00000101040	ZMYND8	0.074313	0	0	0	0	0	0	0	0
ENST00000566269	ENSG00000102854	MSLN	0.074104	0	0	0	0	0	0	0	0
ENST00000442262	ENSG00000089820	ARHGAP4	0.073955	0.010172	0	0	0	0	0	0	0
ENST00000503921	ENSG00000164307	ERAP1	0.073871	0	0	0	0	0	0	0	0
ENST00000554642	ENSG00000131966	ACTR10	0.073859	0	0	0	0	0	0	0	0
ENST00000512761	ENSG00000170469	SPATA24	0.07331	0	0	0	0	0	0	0	0
ENST00000301420	ENSG00000167748	KLK1	0.073284	0	0	0	0	0	0.025178	0	0
ENST00000446430	ENSG00000182585	EPGN	0.073268	0	0	0	0	0	0.015314	0	0
ENST00000490973	ENSG00000196456	ZNF775	0.073008	0	0	0	0	0	0.00324	0	0.038625
ENST00000552633	ENSG00000110881	ASIC1	0.072945	0	0	0	0	0	0	0	0
ENST00000414082	ENSG00000078804	TP53INP2	0.072122	0	0.022609	0	0	0	0	0	0.009887
ENST00000508297	ENSG00000017260	ATP2C1	0.071732	0	0	0	0	0.00833	0.013227	0.00833	0
ENST00000512348	ENSG00000157107	FCHO2	0.071711	0	0	0	0	0	0	0	0
ENST00000530938	ENSG00000166444	ST5	0.071537	0	0	0	0	0	0	0	0
ENST00000444469	ENSG00000233493	TMEM238	0.070956	0	0	0	0	0	0	0	0
ENST00000418321	ENSG00000184708	EIF4ENIF1	0.070862	0	0	0	0	0	0	0	0
ENST00000426968	ENSG00000054392	HHAT	0.07072	0	0	0	0.001676	0	0.011606	0	0
ENST00000519457	ENSG00000164941	INTS8	0.070467	3.4e-05	0	0	0	0	0	0	0
ENST00000574045	ENSG00000186260	MRTFB	0.07007	0	0	0.0015	0	0	0	0	0
ENST00000636767	ENSG00000102805	CLN5	0.069649	0	0	0	0	0	0	0	0
ENST00000382892	ENSG00000109685	NSD2	0.069585	0	0	0	0	0	0	0	0
ENST00000437553	ENSG00000100814	CCNB1IP1	0.069351	0	0	0	0	0	0.000741	0	0
ENST00000508196	ENSG00000114670	NEK11	0.069184	0	0	0	0	0	0	0	0
ENST00000472886	ENSG00000143469	SYT14	0.068668	0	0	0	0	0.006895	0.006372	0.006895	0
ENST00000545590	ENSG00000100221	JOSD1	0.068667	0	0	0	0	0	0	0	0
ENST00000566051	ENSG00000132604	TERF2	0.068563	0	0	0	0	0.020038	0	0.020038	0
ENST00000534549	ENSG00000166086	JAM3	0.06852	0	0	0	0	0	0	0	0
ENST00000556419	ENSG00000100802	C14orf93	0.068476	0	0	0	0	0	0	0	0
ENST00000511641	ENSG00000131711	MAP1B	0.067882	0	0	0	0.001525	0.000854	0	0.000854	0.000961
ENST00000644630	ENSG00000115355	CCDC88A	0.067804	0	0	0	0	0	0	0	0
ENST00000368870	ENSG00000143390	RFX5	0.06769	0	0	0	0	0	0	0	0
ENST00000421992	ENSG00000151240	DIP2C	0.067581	0	0	0	0	0.000724	0	0.000724	0.001904
ENST00000537093	ENSG00000166037	CEP57	0.067453	0	0	0	0	0	0	0	0
ENST00000552619	ENSG00000111785	RIC8B	0.067224	0	0	0	0	0	0.003226	0	0.003073
ENST00000315660	ENSG00000157514	TSC22D3	0.067092	0	0	0	9e-06	0	0	0	2.3e-05
ENST00000529546	ENSG00000198431	TXNRD1	0.067059	0	0	0	0.013178	0	0	0	0.011476
ENST00000552689	ENSG00000123411	IKZF4	0.066939	0.023797	0	0	0	0	0	0	0
ENST00000392563	ENSG00000177885	GRB2	0.066934	0	0	0	0	0	0	0	0
ENST00000261454	ENSG00000117707	PROX1	0.06638	0	0.01882	0	0	0	0	0	0
ENST00000505810	ENSG00000183111	ARHGEF37	0.066083	0	0	0.021753	0.005434	0	0	0	0
ENST00000445545	ENSG00000058453	CROCC	0.065503	0	0	0	0	0	0	0	0
ENST00000439591	ENSG00000128271	ADORA2A	0.065499	0	0	0	0	0	0	0	0
ENST00000493838	ENSG00000154928	EPHB1	0.065407	0	0.024487	0	0	0.006418	0	0.006418	0
ENST00000533141	ENSG00000185201	IFITM2	0.065378	0	0	0	0	0	0	0	0
ENST00000611394	ENSG00000186654	PRR5	0.065224	0	0	0	0	0.002963	0	0.002963	0
ENST00000429355	ENSG00000179912	R3HDM2	0.064365	0	0.025781	0	0.005003	0	0	0	0
ENST00000376760	ENSG00000132879	FBXO44	0.064245	0	0	0	0	0	0	0	0
ENST00000474121	ENSG00000101901	ALG13	0.063976	4.3e-05	2e-05	0.00222	4e-06	0.016959	0.003022	0.016959	3e-06
ENST00000446658	ENSG00000184792	OSBP2	0.06391	0	0	0	0	0	0	0	0
ENST00000394850	ENSG00000068724	TTC7A	0.0637	0.007928	0.00075	0	0.000514	0	0.001045	0	0.000318
ENST00000372274	ENSG00000133678	TMEM254	0.063642	0	0.004209	0	0	0.001466	0.007076	0.001466	0.002978
ENST00000396263	ENSG00000204536	CCHCR1	0.062942	0	0	0	0	0	0	0	0
ENST00000652299	ENSG00000052850	ALX4	0.062686	0	0	0	0	0	0	0	0
ENST00000580647	ENSG00000082397	EPB41L3	0.062282	0	0	0	0	0	0.02434	0	0
ENST00000388882	ENSG00000145779	TNFAIP8	0.061304	0.01587	0	0	0	0.013804	0	0.013804	0
ENST00000445153	ENSG00000138375	SMARCAL1	0.061203	0	0	0	0	0	0	0	0.005657
ENST00000547167	ENSG00000123411	IKZF4	0.061097	0	0	0.004923	0	0	0	0	0
ENST00000644753	ENSG00000102974	CTCF	0.06106	0	0.00168	0.005274	0.00227	0.008249	0.00516	0.008249	0.00916
ENST00000487695	ENSG00000115896	PLCL1	0.060948	0	0	0	0	0.000281	0	0.000281	0
ENST00000397860	ENSG00000197971	MBP	0.060871	0.009619	0	0.01007	0.00518	0	0	0	0
ENST00000389602	ENSG00000124920	MYRF	0.060533	0	0	0	0	0	0	0	0
ENST00000652615	ENSG00000181666	HKR1	0.060411	0	0	0	0.002951	0.00286	0.000413	0.00286	0
ENST00000449234	ENSG00000080298	RFX3	0.060273	0	0	0	0	0	0	0	0
ENST00000409451	ENSG00000204120	GIGYF2	0.058881	0	0	0	0.005502	0.014542	0.012206	0.014542	0
ENST00000586174	ENSG00000091947	TMEM101	0.05888	0	0	0	0	0	0	0	0
ENST00000593074	ENSG00000105270	CLIP3	0.058815	0	0	0	0	0.005938	0	0.005938	0
ENST00000542061	ENSG00000112787	FBRSL1	0.057844	0	0	0	0	0	0	0	0
ENST00000428724	ENSG00000167377	ZNF23	0.057769	0	0	0	0	0	0.000735	0	0.00434
ENST00000604420	ENSG00000136811	ODF2	0.057643	0	0	0	0	0	0	0	0
ENST00000560422	ENSG00000185787	MORF4L1	0.05695	0.003844	0.001457	0	0.000323	0.003086	0.004875	0.003086	0.00839
ENST00000405335	ENSG00000105982	RNF32	0.056912	0.004341	0.000481	0	0	0.006541	0.005914	0.006541	0
ENST00000409805	ENSG00000144366	GULP1	0.056696	0	0	0	0	0	0	0	0
ENST00000381775	ENSG00000130592	LSP1	0.056283	0	0	0	0	0	0	0	0.001271
ENST00000639143	ENSG00000163964	PIGX	0.056116	0.008207	0.007096	0.005395	0.006154	0.002375	0	0.002375	0
ENST00000423422	ENSG00000116584	ARHGEF2	0.056023	0	0	0	0	0	0.008375	0	0
ENST00000544696	ENSG00000149485	FADS1	0.055508	0.002212	0	0	0	0.019664	0.008372	0.019664	0
ENST00000525839	ENSG00000136002	ARHGEF4	0.054641	0.009102	0.004504	0	0	0.010705	0.001936	0.010705	0.000895
ENST00000441725	ENSG00000143776	CDC42BPA	0.054422	0.00882	0	0.001778	0.007449	0	0	0	0
ENST00000396328	ENSG00000166415	WDR72	0.054385	0	0	0.01287	0.013492	0.003773	0	0.003773	0
ENST00000571854	ENSG00000186532	SMYD4	0.054244	0.002846	0	0	0	0	0	0	0
ENST00000641511	ENSG00000108439	PNPO	0.053911	0	0	0.004296	0	0	0	0	0
ENST00000566741	ENSG00000203727	SAMD5	0.053867	0	0	0	0	0	0	0	0
ENST00000428462	ENSG00000100206	DMC1	0.053794	0.015411	0	0	0	0	0	0	0
ENST00000531316	ENSG00000109944	JHY	0.053763	0	0	0	0.033177	0	0	0	0
ENST00000457313	ENSG00000135912	TTLL4	0.053756	0	0.003021	0	0.004297	0	0.005715	0	0
ENST00000492959	ENSG00000153767	GTF2E1	0.053592	0	0	0	0.008719	0	0	0	0
ENST00000354903	ENSG00000179094	AC129492.1	0.05359	0	0.019106	0	0	0	9.2e-05	0	0
ENST00000598352	ENSG00000188493	C19orf54	0.053578	0	0	0	0	0	0	0	0
ENST00000444487	ENSG00000069399	BCL3	0.052903	0	0	0	0	0	0.021298	0	0
ENST00000514111	ENSG00000170571	EMB	0.052856	0	0	0	0.002856	0	0	0	0.001889
ENST00000489835	ENSG00000224940	PRRT4	0.052552	0	0	0	0.011951	0	0	0	0
ENST00000494580	ENSG00000183230	CTNNA3	0.052403	0	0	0	0	0	0	0	0
ENST00000486135	ENSG00000124370	MCEE	0.052211	0	0	0	0	0	0	0	0
ENST00000430260	ENSG00000169398	PTK2	0.051947	0	0.003215	0	0	0	0.004325	0	0.005813
ENST00000436754	ENSG00000120913	PDLIM2	0.051865	0	0	0	0	0.009141	0	0.009141	0
ENST00000553669	ENSG00000100626	GALNT16	0.051848	0.027873	0	0	0	0	0	0	0
ENST00000438486	ENSG00000137965	IFI44	0.051683	0.026313	1.9e-05	0	1.3e-05	9e-06	5.2e-05	9e-06	1.1e-05
ENST00000464546	ENSG00000144857	BOC	0.051579	0	0	0	0	0	0	0	0
ENST00000347401	ENSG00000163359	COL6A3	0.051425	0	0.011639	0	0	0	0	0	0
ENST00000526816	ENSG00000028277	POU2F2	0.051232	0	0.004522	0	0	0	0	0	0.014643
ENST00000443318	ENSG00000144504	ANKMY1	0.051163	0	0	0	0	0	0	0	0.001848
ENST00000419488	ENSG00000187391	MAGI2	0.050994	0.000958	0	0	0	0	0	0	0
ENST00000531378	ENSG00000150776	NKAPD1	0.050984	0	0	0	0	0	0	0	0
ENST00000506529	ENSG00000173320	STOX2	0.050737	0	0.017148	0	0	0	0.011164	0	0.002091
ENST00000433147	ENSG00000100150	DEPDC5	0.050435	0	0	0	0	0	0	0	0
ENST00000560006	ENSG00000137872	SEMA6D	0.05015	0	0	0	0	0	0	0	0.024299
ENST00000633646	ENSG00000023171	GRAMD1B	0.049846	0	0.026162	0	0	0	0	0	0
ENST00000633794	ENSG00000146122	DAAM2	0.049729	0.016616	0.001319	0	0	0	0	0	0
ENST00000452151	ENSG00000131389	SLC6A6	0.049582	0	0	0.023774	0	0	0	0	0
ENST00000625061	ENSG00000067646	ZFY	0.049465	0	0	0	0	0	0	0	0
ENST00000450993	ENSG00000115556	PLCD4	0.049417	0	0.026182	0	0	0	0.004951	0	0
ENST00000646282	ENSG00000122257	RBBP6	0.049363	0.001541	0.000572	0.00102	0.000657	0.001299	0.011286	0.001299	0.001234
ENST00000521353	ENSG00000177873	ZNF619	0.049231	0.00207	0.006129	0	0.000532	0.000585	0	0.000585	0
ENST00000583413	ENSG00000108262	GIT1	0.049217	0	0	0	0	0	0	0	0
ENST00000534705	ENSG00000090686	USP48	0.049097	0.004616	0.012688	0	0	0	0	0	0.008063
ENST00000536350	ENSG00000111644	ACRBP	0.049083	0.022144	0	0	0	0	0	0	0
ENST00000447048	ENSG00000145016	RUBCN	0.048812	0	0	0	0	0	0	0	0
ENST00000592199	ENSG00000008441	NFIX	0.048506	0	0	0	0	0	0	0	0
ENST00000619346	ENSG00000179304	AC234031.1	0.048441	0	0	0	0	0	0	0	0
ENST00000487447	ENSG00000106665	CLIP2	0.048273	0	0	0	0	0	0	0	0
ENST00000505846	ENSG00000145293	ENOPH1	0.048051	0.005868	0.000567	0.001184	0.000328	0.00011	0.001771	0.00011	0.002638
ENST00000367257	ENSG00000131018	SYNE1	0.048002	0.015383	0.005308	0	0	0	0	0	0.007522
ENST00000594374	ENSG00000268361	L34079.1	0.04777	0	0	0	0	0	0	0	0
ENST00000396952	ENSG00000180785	OR51E1	0.047758	0.006112	0	0.00307	0.003024	0	0.013324	0	0
ENST00000565454	ENSG00000140682	TGFB1I1	0.047468	0.003118	0	0	0	0	0	0	0
ENST00000508576	ENSG00000152413	HOMER1	0.047361	0	0	0	0	0	0	0	0
ENST00000464191	ENSG00000176597	B3GNT5	0.046498	0.01003	0.003468	0.006748	0.000903	0	0	0	0.00876
ENST00000454124	ENSG00000115504	EHBP1	0.04629	0	0	0	0	0	0	0	0
ENST00000629020	ENSG00000146416	AIG1	0.045879	0.002663	0.002391	0	0.001727	0.008906	0	0.008906	0.001884
ENST00000509013	ENSG00000145687	SSBP2	0.045869	0.004008	0	0	0	0	0	0	0.00443
ENST00000513317	ENSG00000151726	ACSL1	0.045827	0	0.010862	0	0	0.001784	0	0.001784	0
ENST00000469444	ENSG00000144355	DLX1	0.045656	0	0	0	0	0	0	0	0
ENST00000543697	ENSG00000127314	RAP1B	0.045644	0	0	0	0	0	0	0	0
ENST00000537309	ENSG00000256762	STH	0.045269	0	0	0	0	0.002167	0	0.002167	0
ENST00000379308	ENSG00000161040	FBXL13	0.04516	0	0	0	0	0	0.011999	0	0.015494
ENST00000265382	ENSG00000107242	PIP5K1B	0.044402	0	0	0	0.010365	0	0	0	0
ENST00000460468	ENSG00000151150	ANK3	0.044339	0	0.008088	0	0	0	0	0	0.016115
ENST00000468888	ENSG00000163539	CLASP2	0.043785	0	0	0	0	0	0	0	0.005535
ENST00000228916	ENSG00000111319	SCNN1A	0.04376	0	0	0.001728	0	0	0	0	0
ENST00000413026	ENSG00000122882	ECD	0.043577	0.004047	0	0.004275	0.007144	0.002963	0.001912	0.002963	0.003279
ENST00000422234	ENSG00000127603	MACF1	0.043453	0.001251	0	0	0	0	0	0	0
ENST00000497522	ENSG00000143224	PPOX	0.043245	0.017651	0	0.004534	0	0	0.001471	0	0.001097
ENST00000624874	ENSG00000112852	PCDHB2	0.042825	0	0	0	0	0	0	0	0
ENST00000618761	ENSG00000158747	NBL1	0.042688	0	0	0.000919	0	0.000432	0.002567	0.000432	0
ENST00000437756	ENSG00000100065	CARD10	0.04265	0	0	0	0	0	0	0	0
ENST00000558462	ENSG00000022976	ZNF839	0.042641	0	0	0.008587	0	0	0	0	0
ENST00000419399	ENSG00000197444	OGDHL	0.04171	0	0	0	0	0	0	0	0
ENST00000445205	ENSG00000100034	PPM1F	0.041276	0	0	0.00859	0	0	0.002547	0	0
ENST00000542954	ENSG00000110906	KCTD10	0.041236	0.000124	0.014124	0	6.3e-05	0	0	0	0.000101
ENST00000455784	ENSG00000184702	2021-09-05	0.041165	0	0	0	0	0	0	0	0
ENST00000371848	ENSG00000131725	WDR44	0.040779	0	0	0.000722	0.000808	0.002119	0.000894	0.002119	0.000464
ENST00000512597	ENSG00000164142	FAM160A1	0.040667	0	0	0	0	0	0	0	0
ENST00000583510	ENSG00000176809	LRRC37A3	0.040181	0	0	0	0	0	0	0	0
ENST00000523148	ENSG00000055950	MRPL43	0.039669	0	0	0.017715	0	0	0	0	0
ENST00000473045	ENSG00000114796	KLHL24	0.039378	0	0	0	0	0	0	0	0
ENST00000519019	ENSG00000133943	DGLUCY	0.039299	0	1e-06	0	0	0.002416	0	0.002416	0
ENST00000635466	ENSG00000021645	NRXN3	0.039147	0.007956	0	0	0	0.002822	0	0.002822	0
ENST00000643516	ENSG00000166340	TPP1	0.039143	0.011864	0	0	0	0	0	0	0
ENST00000295868	ENSG00000206530	CFAP44	0.038985	0	0	0	0	0	0	0	0.01163
ENST00000423362	ENSG00000171161	ZNF672	0.038668	0	0	0	0	0	0	0	0
ENST00000514453	ENSG00000127419	TMEM175	0.0386	0	0	0	0	0	0	0	0
ENST00000510855	ENSG00000008294	SPAG9	0.038336	0	0	0	0	0	0	0	0.022477
ENST00000434242	ENSG00000181481	RNF135	0.0383	0	0	0	0	0	0	0	0
ENST00000396573	ENSG00000183454	GRIN2A	0.038295	0	0.000629	0	0.001053	0	0.002254	0	0.003424
ENST00000388942	ENSG00000169758	TMEM266	0.038059	0	0	0	0	0	0	0	0
ENST00000612407	ENSG00000213588	ZBTB9	0.038023	0	0	0	0	0	0	0	0
ENST00000589616	ENSG00000072071	ADGRL1	0.0379	0	0	0	0	0	0	0	0.018257
ENST00000561552	ENSG00000140961	OSGIN1	0.037882	0	0	0	0	0	0	0	0
ENST00000624887	ENSG00000197479	PCDHB11	0.037776	0	0	0	0	0	0	0	0
ENST00000435036	ENSG00000182979	MTA1	0.037685	0	0	0	0	0	0	0	0.01419
ENST00000454032	ENSG00000170820	FSHR	0.037562	0	0	0	0	0	0	0	0
ENST00000553341	ENSG00000119686	FLVCR2	0.037497	0	0	0	0	0	0	0	0
ENST00000401921	ENSG00000048052	HDAC9	0.037285	0	0	0	0	0	0	0	0
ENST00000444434	ENSG00000153790	C7orf31	0.037198	0	0	0	0	0	0	0	0
ENST00000587258	ENSG00000132478	UNK	0.037097	0	0	0	0	0	0.021321	0	0
ENST00000483129	ENSG00000154175	ABI3BP	0.036887	0	0	0	0	0	0	0	0
ENST00000367007	ENSG00000143473	KCNH1	0.036708	0	0	0	0	0	0	0	0
ENST00000494742	ENSG00000114054	PCCB	0.036535	0	0.002252	0	0	0	0	0	0.008174
ENST00000478315	ENSG00000107249	GLIS3	0.036449	0	0	0	0	0.005316	0	0.005316	0
ENST00000370373	ENSG00000203910	C1orf146	0.036185	0	0	0	0	0	0	0	0
ENST00000642689	ENSG00000101266	CSNK2A1	0.035489	0	0	0	0	0	0	0	0.023549
ENST00000548645	ENSG00000151322	NPAS3	0.035269	0	0	0	0	0	0	0	0
ENST00000621960	ENSG00000278540	ACACA	0.035126	0	0	0	0	0	0	0	0
ENST00000278460	ENSG00000149179	C11orf49	0.035095	0.000766	0.000742	0.000187	0.001049	0.010743	0.000603	0.010743	0.000489
ENST00000429199	ENSG00000161395	PGAP3	0.034824	0	0	0	0	0	0	0	0
ENST00000412658	ENSG00000100031	GGT1	0.034415	0	0	0	0	0	0	0	0
ENST00000442714	ENSG00000115677	HDLBP	0.034383	0	0.004439	0	0	0.002371	0.013751	0.002371	0
ENST00000375916	ENSG00000204444	APOM	0.034322	0	0.004698	0.007674	0.005166	0	0	0	0
ENST00000436734	ENSG00000065320	NTN1	0.034006	0.013271	0	0	0	0	0	0	0
ENST00000425400	ENSG00000158747	NBL1	0.033985	0	0	0	0	0	0	0	0
ENST00000218004	ENSG00000101888	NXT2	0.033814	0	0	0	0	0	0	0	0
ENST00000441021	ENSG00000144792	ZNF660	0.033753	0	0	0.004721	0.015975	0	0	0	0
ENST00000240095	ENSG00000104635	SLC39A14	0.03375	0	0.002507	0.003261	0	0	0	0	0
ENST00000490534	ENSG00000185008	ROBO2	0.033538	0	0	0	0	0.015817	0	0.015817	0
ENST00000531963	ENSG00000203705	TATDN3	0.033423	0	0	0	0	0	0	0	0
ENST00000575848	ENSG00000217930	PAM16	0.033059	0.002282	0	0.003239	0	0.00358	0.004683	0.00358	0.000927
ENST00000528379	ENSG00000137502	RAB30	0.033015	0	0	0	0	0	0	0	0
ENST00000450761	ENSG00000134986	NREP	0.032944	0	0	0	0	0	0	0	0
ENST00000646630	ENSG00000197283	SYNGAP1	0.032904	0	0.000389	0.010319	0	0.0021	0	0.0021	0
ENST00000330947	ENSG00000197147	LRRC8B	0.032512	0	0	0	0	0	0	0	0.016733
ENST00000421802	ENSG00000159128	IFNGR2	0.032457	0	0	0	0	0	0	0	0.019821
ENST00000334850	ENSG00000186765	FSCN2	0.03224	0	0	0	0	0	0	0	0.00204
ENST00000537325	ENSG00000157870	PRXL2B	0.032056	0	0	0	0	0	0	0	0
ENST00000351960	ENSG00000137497	NUMA1	0.031491	0.000133	0	0	0	0	0	0	0
ENST00000523449	ENSG00000169045	HNRNPH1	0.031393	0	0	0	0	0.013173	0	0.013173	0
ENST00000420027	ENSG00000244687	UBE2V1	0.031308	0.001609	0.001593	0.000667	0	0.002484	0.005469	0.002484	0.001515
ENST00000525902	ENSG00000198561	CTNND1	0.031195	0	0	0	0	0	0	0	0
ENST00000474522	ENSG00000156639	ZFAND3	0.031113	0	0	0	0	0	0	0	0
ENST00000616444	ENSG00000151150	ANK3	0.030659	0	0	0.002728	0	0	0	0	0
ENST00000550841	ENSG00000136098	NEK3	0.030539	0	0.002565	0.012831	0.0018	0	0	0	0
ENST00000418519	ENSG00000073605	GSDMB	0.030508	0.002401	0.00733	0.00359	0.003207	0	0	0	0
ENST00000559885	ENSG00000171766	GATM	0.03046	0	0	0	0	0	0	0	0.01674
ENST00000602679	ENSG00000161249	DMKN	0.030452	0	0	0	0	0	0	0	0
ENST00000506654	ENSG00000127022	CANX	0.030269	0	0	0	0	0	0	0	0
ENST00000545294	ENSG00000152332	UHMK1	0.029968	0	0	0	0	0	0	0	0
ENST00000368297	ENSG00000160789	LMNA	0.029821	0	0	0	0	0	0	0	0
ENST00000575994	ENSG00000184009	ACTG1	0.029717	0.005814	0.005398	0	0	0	0	0	0.000533
ENST00000530539	ENSG00000154175	ABI3BP	0.029466	0	0	0	0	0	0	0	0
ENST00000428908	ENSG00000153064	BANK1	0.029147	0.015075	0	0	0	0	0	0	0
ENST00000442437	ENSG00000224659	GAGE12J	0.029129	0	0	0	0	0	0	0	0
ENST00000550194	ENSG00000111596	CNOT2	0.028934	0	0	0	0	0	0	0	0
ENST00000375771	ENSG00000162458	FBLIM1	0.028802	0.000594	0	0	0	0	0	0	0.00022
ENST00000624953	ENSG00000008086	CDKL5	0.028786	0	0	0	0	0	0.011433	0	0
ENST00000349451	ENSG00000125510	OPRL1	0.028749	0	0	0	0	0	0	0	0
ENST00000433917	ENSG00000188706	ZDHHC9	0.028743	0	0	0	0	0	0	0	0
ENST00000552874	ENSG00000151322	NPAS3	0.028693	0.00731	0	0	0	0	0	0	0
ENST00000531048	ENSG00000138303	ASCC1	0.028393	0	0	0	0	0	0	0	0
ENST00000461828	ENSG00000158525	CPA5	0.028353	0	0	0	0	0	0	0	0
ENST00000358321	ENSG00000099994	SUSD2	0.028195	0	0.003065	0.003385	0	0	0.004828	0	0.003619
ENST00000488576	ENSG00000065809	FAM107B	0.028136	0	0	0.005099	0	0	0	0	0
ENST00000440067	ENSG00000161040	FBXL13	0.028105	0	0	0	0	0	0	0	0
ENST00000530380	ENSG00000173338	KCNK7	0.027867	0	0	0	0	0	0	0	0.016189
ENST00000495739	ENSG00000151789	ZNF385D	0.027793	0	0	0	0	0	0	0	0
ENST00000640419	ENSG00000153094	BCL2L11	0.027466	0	0	0	0	0	0	0	0
ENST00000541083	ENSG00000177990	DPY19L2	0.027243	0.005158	0	0	0	0.008088	0	0.008088	0.000597
ENST00000482155	ENSG00000213533	STIMATE	0.027233	0	0	0	0	0	0	0	0
ENST00000415750	ENSG00000135205	CCDC146	0.027131	0.008825	0	0	0	0	0	0	0.002679
ENST00000616289	ENSG00000120913	PDLIM2	0.026954	0	0	0	0	0	0	0	0
ENST00000401034	ENSG00000162618	ADGRL4	0.026724	0	0	0	0	0	1e-06	0	0
ENST00000546087	ENSG00000285441	SOD2	0.026585	0	0	0	0	0	0	0	0
ENST00000564328	ENSG00000173517	PEAK1	0.026546	0	0	0	0	0	0	0	0
ENST00000397287	ENSG00000128284	APOL3	0.026381	0.003387	4.2e-05	0.011818	0	0	0	0	0
ENST00000552127	ENSG00000185024	BRF1	0.026366	0	0	0	0	0	0	0	0
ENST00000420921	ENSG00000170153	RNF150	0.02613	0	0	0.003078	0	0.000488	0	0.000488	0.003902
ENST00000403492	ENSG00000167077	MEI1	0.025659	0	0	0	0	0	0	0	0
ENST00000412641	ENSG00000186448	ZNF197	0.025582	0	0	0	0	0	0	0	0
ENST00000449116	ENSG00000162105	SHANK2	0.025434	0	0	0	0	0	0	0	0
ENST00000514618	ENSG00000145416	2021-03-01	0.025136	0	0	0	0	0	0	0	0.001035
ENST00000511253	ENSG00000164037	SLC9B1	0.025054	0	0	0	0	0	0	0	0
ENST00000343737	ENSG00000075290	WNT8B	0.024925	0	0	0	0	0	0	0	0
ENST00000544856	ENSG00000173838	2021-03-10	0.024352	0	0	0.003052	0.002764	0	0.00643	0	0
ENST00000522340	ENSG00000158856	DMTN	0.023873	0	0	0	0	0	0	0	0
ENST00000566119	ENSG00000179151	EDC3	0.023809	0	0	0	9e-06	0	0	0	0
ENST00000216155	ENSG00000100321	SYNGR1	0.023648	0.002595	0	0	0	0	0.012179	0	0
ENST00000340612	ENSG00000186409	CCDC30	0.023315	0	0	0	0	0	0	0	0
ENST00000418143	ENSG00000144535	DIS3L2	0.023306	0	0	0	0	0	0	0	0
ENST00000396617	ENSG00000196588	MRTFA	0.023052	0	0	0	0	0	0	0	0
ENST00000394715	ENSG00000089775	ZBTB25	0.023011	0	0	0	0	0	0	0	0
ENST00000409375	ENSG00000152056	AP1S3	0.022992	0	0.00712	0	0	0	0	0	0
ENST00000502394	ENSG00000280987	MATR3	0.022991	0.001047	0.003286	0.000807	0.000729	0.001676	0.002289	0.001676	0
ENST00000574668	ENSG00000167874	TMEM88	0.022927	0	0	0	0	0	0	0	0
ENST00000340339	ENSG00000159618	ADGRG5	0.022904	0.011418	0	0	0	0	0	0	0
ENST00000480696	ENSG00000188687	SLC4A5	0.022851	0	0	0	0	0	0	0	0
ENST00000554740	ENSG00000151320	AKAP6	0.022803	0	0	0	0.00337	0	0	0	0
ENST00000377532	ENSG00000049246	PER3	0.022613	0	0	0	0	0	0	0	0
ENST00000648658	ENSG00000132535	DLG4	0.022599	0	0	0	0	0	0	0	0
ENST00000618601	ENSG00000268350	FAM156A	0.022518	0	0	0	0	0	0	0	0
ENST00000257632	ENSG00000243566	UPK3B	0.022384	0	0.000281	5.9e-05	0	0.001297	0.002828	0.001297	0
ENST00000582335	ENSG00000124422	USP22	0.022301	0	0	0	0	0	0	0	0
ENST00000573652	ENSG00000189375	TBC1D28	0.022197	0	0	0	0	0.000949	0	0.000949	0
ENST00000437473	ENSG00000081189	MEF2C	0.022045	0	0	0	0	0.005792	0.00346	0.005792	0.000856
ENST00000557555	ENSG00000135424	ITGA7	0.021961	0	0.004631	0	0	0	0	0	0
ENST00000315915	ENSG00000176281	OR4K5	0.021928	0	0	0	0	0.010802	0	0.010802	0
ENST00000452499	ENSG00000157992	KRTCAP3	0.0218	0	0	0	0	0	0	0	0
ENST00000589681	ENSG00000132026	RTBDN	0.021762	0	0	0	0	0	0	0	0
ENST00000628832	ENSG00000119720	NRDE2	0.0215	0	0	0	0	0	0	0	0
ENST00000528306	ENSG00000166261	ZNF202	0.021476	0.006646	0	0	0	0.005158	0	0.005158	0
ENST00000586186	ENSG00000185379	RAD51D	0.021337	0	0	0	0	0	0	0	0
ENST00000442421	ENSG00000204977	TRIM13	0.021307	0	0	0	0	0	0.012016	0	0
ENST00000507176	ENSG00000138814	PPP3CA	0.02129	0	0.009331	0	0	0	0	0	0.001573
ENST00000419490	ENSG00000127483	HP1BP3	0.02112	0	0	0	0	0	0	0	0
ENST00000542471	ENSG00000176473	WDR25	0.021088	0.001537	0.002385	0.00059	0.001165	0.004394	0.000849	0.004394	0
ENST00000409147	ENSG00000180398	MCFD2	0.021002	0	0	0	0.000427	0	0.004708	0	0
ENST00000431550	ENSG00000136110	CNMD	0.020754	0.011006	0	0	0	0	0	0	0
ENST00000366698	ENSG00000162931	TRIM17	0.020258	0	0	0	0	0.002021	0	0.002021	0.003497
ENST00000569089	ENSG00000263155	MYZAP	0.020108	0	0	0	0	0	0	0	0
ENST00000545380	ENSG00000182985	CADM1	0.019954	0	0	0	0	0	0	0	0
ENST00000409011	ENSG00000152147	GEMIN6	0.019924	1e-06	0	0	0	0	0	0	0
ENST00000433852	ENSG00000138031	ADCY3	0.019419	0	0	0	0	0	0	0	0
ENST00000431282	ENSG00000184730	APOBR	0.019418	0	0	0	0	0	0	0	0
ENST00000447669	ENSG00000092871	RFFL	0.019407	0	0	0.000212	0.000454	0	0	0	0.002147
ENST00000447747	ENSG00000139579	NABP2	0.019351	0	0	0	0	0	0	0	0
ENST00000557508	ENSG00000100567	PSMA3	0.019312	0.001161	0	0	0	0	0	0	0
ENST00000393721	ENSG00000089820	ARHGAP4	0.018702	0	0	0	0	0	0.002351	0	0
ENST00000006750	ENSG00000007312	CD79B	0.018627	0.007353	0	0	0	0	0	0	0
ENST00000428494	ENSG00000167925	GHDC	0.018583	8.1e-05	0.000775	0	0	0	0	0	0
ENST00000483017	ENSG00000182809	CRIP2	0.018376	0	0	0	0	0	0	0	0
ENST00000557268	ENSG00000078304	PPP2R5C	0.018239	0	0	0	0.000722	0	0	0	0
ENST00000639856	ENSG00000110171	TRIM3	0.018023	0.004356	0.00448	0	0	0.001296	0.001355	0.001296	0
ENST00000431887	ENSG00000006468	ETV1	0.017771	0	0	0	0	0	0	0	0
ENST00000344297	ENSG00000123191	ATP7B	0.017699	0.005283	0	0	0	0	0	0	0
ENST00000300575	ENSG00000167194	C16orf92	0.017607	0	0	0	0	0	0	0	0
ENST00000423377	ENSG00000074582	BCS1L	0.017209	0	0	0	0	0	0	0	0
ENST00000622494	ENSG00000101413	RPRD1B	0.016994	0.001522	0	0.000849	0.001031	0.003766	0.000951	0.003766	0.001457
ENST00000492542	ENSG00000095637	SORBS1	0.016968	0	0	0	0	0	0	0	0
ENST00000420858	ENSG00000115526	CHST10	0.016882	0	0	0	0	0.006041	0	0.006041	0
ENST00000641737	ENSG00000109339	MAPK10	0.016779	0	0.001117	0	0	0	0	0	7.6e-05
ENST00000504449	ENSG00000248485	PCP4L1	0.016756	0	0	0	0	0	0	0	0
ENST00000413806	ENSG00000127616	SMARCA4	0.016729	0	0	0.000285	0.000694	0	0	0	0
ENST00000613271	ENSG00000167992	VWCE	0.016675	0	5.9e-05	0	0	0	0	0	0
ENST00000378844	ENSG00000101311	FERMT1	0.016672	0	0	0	0	0.006423	0	0.006423	0
ENST00000512698	ENSG00000198948	MFAP3L	0.01658	0	0	0	0.007421	0	0	0	0
ENST00000354197	ENSG00000105136	ZNF419	0.016504	0	0	0	0	0	0	0	1e-05
ENST00000375775	ENSG00000153487	ING1	0.01618	0	0	0	0	0	0	0	0
ENST00000376180	ENSG00000198542	ITGBL1	0.016173	0	0	0	0.003787	0	0	0	0
ENST00000509175	ENSG00000162779	AXDND1	0.016035	0	0	0	0	0	0	0	0
ENST00000544064	ENSG00000151491	EPS8	0.016032	0	0	0	0	0	0	0	0
ENST00000409780	ENSG00000153208	MERTK	0.01592	0	0	0	0	0	0	0	0
ENST00000267525	ENSG00000140009	ESR2	0.015912	0	0	0	0	0	0	0	0
ENST00000444317	ENSG00000151690	MFSD6	0.015686	0	0	0	0	0	0	0	0
ENST00000506886	ENSG00000196104	SPOCK3	0.015674	0	0	0	0	0	0.007383	0	0
ENST00000558106	ENSG00000137843	PAK6	0.01566	0	0.00665	0	0	0	0	0	0
ENST00000456331	ENSG00000158528	PPP1R9A	0.015484	0	0	0	0	0	0	0	0
ENST00000398475	ENSG00000086730	LAT2	0.015468	0.003804	0	0	0	0.003024	0	0.003024	0
ENST00000295896	ENSG00000163632	C3orf49	0.015307	0	0	0	0	0	0	0	0
ENST00000545309	ENSG00000183230	CTNNA3	0.015289	0.008131	0	0	0	0	0	0	0
ENST00000526311	ENSG00000110080	ST3GAL4	0.015005	0	0	0	0	0.005715	0	0.005715	0
ENST00000446868	ENSG00000108669	CYTH1	0.014914	0	0	0	0	0	0	0	0
ENST00000477346	ENSG00000102048	ASB9	0.014859	0	0	0	0	0	0	0	0
ENST00000435302	ENSG00000240038	AMY2B	0.014823	0	0.005799	0	0	0	0	0	0
ENST00000649552	ENSG00000110079	MS4A4A	0.014675	0	0	0	0	0.000874	0	0.000874	0.007201
ENST00000611638	ENSG00000166707	ZCCHC18	0.014667	0.002158	0.000653	0.000329	0.000409	0.000219	0.000144	0.000219	2.3e-05
ENST00000540521	ENSG00000132185	FCRLA	0.014529	0	0	0	0	0	0	0	0
ENST00000432863	ENSG00000164080	RAD54L2	0.014482	0	0	0	0	0	0	0	0
ENST00000462838	ENSG00000178075	GRAMD1C	0.014409	0	0	0	0	0	0.002506	0	0.007244
ENST00000432645	ENSG00000048052	HDAC9	0.014372	0	0	0	0	0	0	0	0
ENST00000555059	ENSG00000273171	AC002094.3	0.01437	0	0	0	0	0	0.005485	0	0
ENST00000589469	ENSG00000131467	PSME3	0.01431	0	0	0	0	0	0	0	0
ENST00000436862	ENSG00000164418	GRIK2	0.014213	0	0	0	0	0	0	0	0
ENST00000492345	ENSG00000078699	CBFA2T2	0.014163	0	0	0	0	0.000797	0	0.000797	0
ENST00000542609	ENSG00000113494	PRLR	0.0141	0	0	0	0.00706	0	0	0	0
ENST00000409773	ENSG00000077380	DYNC1I2	0.01381	0.000789	0.0008	0.00045	0.000678	0.001258	0.001142	0.001258	0.000747
ENST00000451297	ENSG00000161249	DMKN	0.013809	0	0	0	0	0	0	0	0
ENST00000440447	ENSG00000251692	PTX4	0.013699	0	0	0	0	0	0	0	0
ENST00000511961	ENSG00000013561	RNF14	0.013629	0	0	0	0	0	0	0	0
ENST00000515835	ENSG00000113448	PDE4D	0.013507	0	0	0	0	0	0	0	0
ENST00000357330	ENSG00000197487	GALP	0.013462	0	0	0	0	0	0	0	0
ENST00000567005	ENSG00000140398	NEIL1	0.013388	0	0	0	0	0	0	0	0
ENST00000395942	ENSG00000183625	CCR3	0.013384	0	0	0	0	0	0.003902	0	0
ENST00000221399	ENSG00000104804	TULP2	0.013358	0	0	0	0	0	0	0	0
ENST00000407032	ENSG00000104805	NUCB1	0.013259	0	0	0	0	0	0	0	0
ENST00000356589	ENSG00000160323	ADAMTS13	0.013251	0	0	0	0	0	0	0	0
ENST00000645410	ENSG00000124733	MEA1	0.013247	0.000413	0	0	0	0.004002	0	0.004002	0.001117
ENST00000460109	ENSG00000158467	AHCYL2	0.013154	0	0	0	0	0.00355	0	0.00355	0
ENST00000480514	ENSG00000185055	EFCAB10	0.013134	0	0	0	0	0	0	0	0
ENST00000463103	ENSG00000151276	MAGI1	0.01304	0	0.001472	0	0	0.000649	0.004089	0.000649	0
ENST00000649657	ENSG00000156650	KAT6B	0.013021	0	0	0	0	0	0	0	0
ENST00000229471	ENSG00000010810	FYN	0.012983	0	0	0.001378	0.005302	0	0	0	0.0011
ENST00000638452	ENSG00000283782	AC116366.3	0.012952	0	0	0	5e-06	0	3e-06	0	2e-06
ENST00000532429	ENSG00000111907	TPD52L1	0.012781	0	0	0	0	0	0	0	0
ENST00000442275	ENSG00000136167	LCP1	0.012766	0	0.001432	0	0.003226	0	0	0	0.001212
ENST00000617889	ENSG00000150045	KLRF1	0.012719	0	0	0	0	0	0	0	0
ENST00000452382	ENSG00000064933	PMS1	0.012677	0	0	0	0	0.002891	0	0.002891	0.004063
ENST00000599111	ENSG00000105499	PLA2G4C	0.012676	0	0	0	0	0	0	0	0
ENST00000372782	ENSG00000166432	ZMAT1	0.012622	0	0	0	0	0	0	0	0
ENST00000639621	ENSG00000156096	UGT2B4	0.012618	0	0	0	0	0	0	0	0
ENST00000532858	ENSG00000173432	SAA1	0.012497	0	0	0	0	0	0	0	0
ENST00000443095	ENSG00000172331	BPGM	0.012408	0	0	0	0	0	0	0	0
ENST00000524612	ENSG00000166483	WEE1	0.012371	0	0	0	0	0	0	0	0
ENST00000376358	ENSG00000196998	WDR45	0.012327	0	0	0	0	0	0	0	0
ENST00000486806	ENSG00000126217	MCF2L	0.012223	0	0	0	0	0	0	0	0
ENST00000609438	ENSG00000185477	GPRIN3	0.01222	0	0.004616	0	0	0	0	0	0.000438
ENST00000267584	ENSG00000140057	AK7	0.012	0.001965	0	0	0	0	0.004943	0	0
ENST00000298552	ENSG00000165699	TSC1	0.011986	2.5e-05	2.7e-05	3e-05	0.000127	4.3e-05	5.8e-05	4.3e-05	6.5e-05
ENST00000360289	ENSG00000156515	HK1	0.011976	0	0	0	0	0	0	0	0
ENST00000618207	ENSG00000179583	CIITA	0.011955	0	0	0	0	0	0	0	0
ENST00000382477	ENSG00000099625	CBARP	0.011951	0	0.001847	0	0	0	0	0	0.001706
ENST00000522909	ENSG00000178125	PPP1R42	0.011924	0	0	0	0	0	0	0	0
ENST00000465901	ENSG00000116661	FBXO2	0.011884	0	0	0	0	0	0	0	0.00415
ENST00000559629	ENSG00000250021	ARPIN-AP3S2	0.011779	0	0	0	0	0	0	0	0
ENST00000403559	ENSG00000128573	FOXP2	0.011742	0	0	0	0	0	0	0	0
ENST00000453479	ENSG00000128242	GAL3ST1	0.011634	0	0	0	0	0	0	0	0.001205
ENST00000638619	ENSG00000204271	SPIN3	0.011494	0	0	0	0	0	0	0	0
ENST00000624495	ENSG00000164404	GDF9	0.011459	0	0	0	0	0	0	0	0
ENST00000456902	ENSG00000172530	BANP	0.01136	0	0	0	0	0	0	0	0
ENST00000635898	ENSG00000081189	MEF2C	0.011346	0	0	0	0	0	0	0	0.005188
ENST00000532019	ENSG00000254986	DPP3	0.011178	0	0	0	0	0	0	0	0
ENST00000334962	ENSG00000176809	LRRC37A3	0.01117	0	0	0	0	0.002795	0	0.002795	0.002484
ENST00000556155	ENSG00000166888	STAT6	0.011141	0.001428	0.000295	0	0.001837	0.001097	0	0.001097	0.001292
ENST00000595750	ENSG00000188368	PRR19	0.011113	0	0	0	0	0	0	0	0
ENST00000560087	ENSG00000157470	FAM81A	0.011095	0	0	0	0	0	0	0	0
ENST00000617719	ENSG00000066427	ATXN3	0.011056	0	0	0	0	0	0	0	0
ENST00000222033	ENSG00000105428	ZNRF4	0.011051	0	0	0	0	0.005201	0	0.005201	0
ENST00000555124	ENSG00000123384	LRP1	0.011026	0	0	0	0	0	0	0	0.000699
ENST00000652335	ENSG00000130656	HBZ	0.011008	0	0	0	0	0	0	0	0
ENST00000594526	ENSG00000142230	SAE1	0.010967	0	0	0	0	0	0	0	0
ENST00000393906	ENSG00000099992	TBC1D10A	0.010954	0	0	0	0	0	0	0	0
ENST00000360096	ENSG00000196503	ARL9	0.010947	0	0	0	0	0	0	0	0
ENST00000416859	ENSG00000066136	NFYC	0.010937	0	0	0	0	0	0	0	0
ENST00000548348	ENSG00000179715	PCED1B	0.010884	0	0	0	0	0	0	0	0
ENST00000399054	ENSG00000125863	MKKS	0.010874	0	0.004512	0	0	0	0	0	0
ENST00000382186	ENSG00000080503	SMARCA2	0.010814	0	0	0	0	0	0	0	0
ENST00000636667	ENSG00000114062	UBE3A	0.010803	0	0	0	0	0	0	0	0
ENST00000572205	ENSG00000070366	SMG6	0.010801	0	0	0	0	0	0	0	0
ENST00000445214	ENSG00000112561	TFEB	0.010797	0	0	0	0	0	0	0	0
ENST00000507993	ENSG00000155158	TTC39B	0.010721	0.000954	0	0	0	0.001065	0.001378	0.001065	1.9e-05
ENST00000375855	ENSG00000130045	NXNL2	0.010582	0	0	0	0	0	0.006411	0	0
ENST00000411874	ENSG00000214694	ARHGEF33	0.010564	0	0	0	0	0	0	0	0
ENST00000370398	ENSG00000185760	KCNQ5	0.010535	0	0	0	0	0	0.002186	0	0
ENST00000401402	ENSG00000166979	EVA1C	0.010534	0	0	0	0	0	0	0	0.000192
ENST00000395461	ENSG00000213658	LAT	0.010521	0	0	0	0	0	0	0	0
ENST00000435861	ENSG00000091073	DTX2	0.010501	0	0.001774	0	0	0	0	0	0.003896
ENST00000647930	ENSG00000141576	RNF157	0.010498	0	0	0	0	0	0	0	0
ENST00000317306	ENSG00000248099	INSL3	0.010492	0	0	0	0	0	0	0	0
ENST00000491174	ENSG00000197024	ZNF398	0.010418	0.000599	0.000483	0	0.003032	0.001484	0	0.001484	0
ENST00000381761	ENSG00000166762	CATSPER2	0.010378	0	0	0	0	0	0	0	0
ENST00000567225	ENSG00000157429	ZNF19	0.010334	0.001357	0	0	0	0.002613	0	0.002613	0
ENST00000549415	ENSG00000135655	USP15	0.010259	0	0	0	0	0	0	0	0.006871
ENST00000217999	ENSG00000101883	RHOXF1	0.010246	0	0	0	0	0	0	0	0
ENST00000514833	ENSG00000113758	DBN1	0.010244	0	0	0	0	0	0	0	0
ENST00000620391	ENSG00000115221	ITGB6	0.010229	0	0	0	0	0	0	0	0
ENST00000480282	ENSG00000114529	C3orf52	0.010224	0	0	0	0	0.000328	0	0.000328	0
ENST00000536290	ENSG00000214530	STARD10	0.01013	0	0	0	0	0	0	0	0
ENST00000540999	ENSG00000196628	TCF4	0.010084	0	0	0	0	0	0	0	0
ENST00000370532	ENSG00000184258	CDR1	0.009953	0	0	0	0	0	0	0	0
ENST00000449321	ENSG00000110002	VWA5A	0.009951	0	0	0	0	0	0	0	0
ENST00000492399	ENSG00000134864	GGACT	0.009949	0	0	0	0	0	0	0	0.006462
ENST00000414235	ENSG00000122678	POLM	0.009889	0	0	0	0	0	0	0	0.00176
ENST00000420128	ENSG00000226124	FTCDNL1	0.009827	0.00457	0	0	0	0	0	0	0
ENST00000524090	ENSG00000170873	MTSS1	0.00981	0	0	0	0	0	0	0	0
ENST00000542187	ENSG00000110841	PPFIBP1	0.009805	0.000744	0	0	0	0	0	0	0
ENST00000429842	ENSG00000151779	NBAS	0.009768	0	0	0	0	0	0.004358	0	0
ENST00000583140	ENSG00000266714	MYO15B	0.009749	0	0	0	0	0	0.003059	0	0
ENST00000519748	ENSG00000187391	MAGI2	0.009742	0	0	0	0	0	0	0	0
ENST00000510323	ENSG00000172765	TMCC1	0.009741	0	0	0	0	0.000238	0	0.000238	0
ENST00000523685	ENSG00000044115	CTNNA1	0.009715	0	0	0	0	0	0	0	0
ENST00000502945	ENSG00000113231	PDE8B	0.009671	0	0	0	0	0	0	0	0
ENST00000639525	ENSG00000204271	SPIN3	0.009668	0	0	0	0	0	0	0	0
ENST00000637100	ENSG00000188603	CLN3	0.009583	0	0	0	0	0.003092	0	0.003092	0
ENST00000521356	ENSG00000197181	PIWIL2	0.009569	0	0	0	0	0	0	0	0
ENST00000381903	ENSG00000205810	KLRC3	0.009559	0	0	0	0	0	0	0	0
ENST00000399142	ENSG00000255552	LY6G6E	0.009547	0	0	0	0	0	0	0	0
ENST00000504391	ENSG00000164128	NPY1R	0.009455	0	0	0	0	0	0	0	0
ENST00000645888	ENSG00000130856	ZNF236	0.009371	0	0	0	0	0	0	0	0
ENST00000290953	ENSG00000159723	AGRP	0.009303	0	0	0	0	0	0	0	0
ENST00000343575	ENSG00000107562	CXCL12	0.009201	0	0	0	0	0	0.005047	0	0
ENST00000373083	ENSG00000096264	NCR2	0.009199	0	0	0	0	0	0	0	0
ENST00000308243	ENSG00000130545	CRB3	0.009132	0	0	0	0	0	0	0	0
ENST00000577628	ENSG00000101670	LIPG	0.009056	0.002963	0	0	0	0	0	0	0
ENST00000624862	ENSG00000186654	PRR5	0.009056	0	0	0	0	0	0	0	0
ENST00000554996	ENSG00000205476	CCDC85C	0.009	0	0	0	0	0	0	0	0
ENST00000519960	ENSG00000104635	SLC39A14	0.008999	0	0	0	0	0	0	0	0.002726
ENST00000541421	ENSG00000256162	SMLR1	0.008954	0	0	0	0	0	0	0	0
ENST00000573275	ENSG00000169180	XPO6	0.00884	0	0	0	0	0	0	0	0
ENST00000634898	ENSG00000149212	SESN3	0.008832	0	0.001232	0	0	0	0	0	0
ENST00000440314	ENSG00000130038	CRACR2A	0.008765	0	0	0	0	0	0	0	0
ENST00000512014	ENSG00000087266	SH3BP2	0.008718	0	0	0	0	0	0	0	0
ENST00000549465	ENSG00000118596	SLC16A7	0.008447	0	0	0	0	0	0	0	0
ENST00000502384	ENSG00000169288	MRPL1	0.008406	0	0	0	0	0	0	0	0.000845
ENST00000638225	ENSG00000109339	MAPK10	0.008378	0	0	0	0	0	0	0	0
ENST00000396600	ENSG00000183044	ABAT	0.008348	0.001654	0.002481	0.000255	0	0	0	0	0.000149
ENST00000379869	ENSG00000173698	ADGRG2	0.008344	0	0	0	0	0	0	0	0
ENST00000566361	ENSG00000157368	IL34	0.008308	0	0	0	0	0	0	0	0
ENST00000440111	ENSG00000165699	TSC1	0.0083	0.000532	0.000426	0.001295	0.001861	0.000625	6.8e-05	0.000625	0.000141
ENST00000462014	ENSG00000145103	ILDR1	0.00828	0	0	0	0	0	0	0	0.002524
ENST00000361824	ENSG00000143452	HORMAD1	0.008263	0	0	0	0	0	0	0	0
ENST00000544854	ENSG00000161513	FDXR	0.008244	0	0	0	0.002485	0	0	0	0
ENST00000562724	ENSG00000103067	ESRP2	0.008242	0	0	0	0	0	0	0	0
ENST00000532525	ENSG00000137486	ARRB1	0.008188	0	0	0	0	0	0	0	0
ENST00000641098	ENSG00000105443	CYTH2	0.008176	0	0	0	0	0	0.003279	0	0.002158
ENST00000562810	ENSG00000140506	LMAN1L	0.008153	0	0	0	0	0	0	0	0
ENST00000275815	ENSG00000146904	EPHA1	0.008103	0	0.001701	0	0	0	0.002974	0	0
ENST00000623241	ENSG00000160781	PAQR6	0.008089	0	0	0	0	0	0	0	0
ENST00000638942	ENSG00000230257	NFE4	0.008077	0	0	0	0	0	0	0	0
ENST00000582602	ENSG00000126858	RHOT1	0.008048	0	0	0	6.6e-05	0	0	0	0
ENST00000296733	ENSG00000164287	CDC20B	0.008024	0	0	0	0.002475	0	0	0	0
ENST00000442496	ENSG00000100060	MFNG	0.008021	0	0	0	0	0	0	0	0
ENST00000513010	ENSG00000171643	S100Z	0.00799	0	0	0	0	0	0	0	0
ENST00000533147	ENSG00000116299	KIAA1324	0.00791	0	0	0	0	0	0	0	0
ENST00000515366	ENSG00000109458	GAB1	0.007887	0	0	0.003592	0	0	0	0	0
ENST00000405557	ENSG00000100142	POLR2F	0.007874	0	0	0	0	0	0	0	0
ENST00000622721	ENSG00000172350	ABCG4	0.007871	0	0	1.9e-05	0	0	0	0	0
ENST00000370989	ENSG00000182793	GSTA5	0.007864	0	0	0	0	0	0	0	0
ENST00000559482	ENSG00000182054	IDH2	0.007799	0	0	0	0	0	0	0	0
ENST00000279028	ENSG00000149635	OCSTAMP	0.007636	0	0	0.00375	0	0	0	0	0
ENST00000314830	ENSG00000095370	SH2D3C	0.007607	0	0	0.001173	0	0	0	0	0
ENST00000379873	ENSG00000173698	ADGRG2	0.007592	0	0	0	0	0	0	0	0
ENST00000488612	ENSG00000182185	RAD51B	0.007591	0	4.1e-05	0.002309	0	0	0	0	0
ENST00000585166	ENSG00000175155	YPEL2	0.007589	0	0	0	0.000419	0	0	0	0
ENST00000587021	ENSG00000131097	HIGD1B	0.007575	0	0	0	0	0	0	0	0
ENST00000492353	ENSG00000169255	B3GALNT1	0.007554	0	0	0	0	0	0	0	0
ENST00000565820	ENSG00000173517	PEAK1	0.007493	0	0	0	0	0	0	0	0
ENST00000321691	ENSG00000181013	C17orf47	0.007423	0	0	0.000337	0	0	0	0	0
ENST00000650886	ENSG00000143549	TPM3	0.007396	0.000682	0	0	0	0	0	0	0
ENST00000525115	ENSG00000177614	PGBD5	0.007382	0	0	0	0	0	0	0	0
ENST00000508315	ENSG00000039560	RAI14	0.007359	0	0	0	0	0	0	0	0
ENST00000534327	ENSG00000204532	ZSCAN5C	0.007288	0	0	0	0	0	0	0	0
ENST00000313070	ENSG00000081803	CADPS2	0.007271	0	0	0	0	0	0	0	0
ENST00000356858	ENSG00000154493	C10orf90	0.007246	0	0	0	0	0	0	0	0
ENST00000525452	ENSG00000231738	TSPAN19	0.007231	0	0	0	0	0	0	0	0
ENST00000431967	ENSG00000109472	CPE	0.007229	0	0	0	0	0	0	0	0
ENST00000328737	ENSG00000065413	ANKRD44	0.007219	0	0	0	0	0	0	0	0.003909
ENST00000525447	ENSG00000188997	KCTD21	0.007164	0	0	0	0	0	0	0	0
ENST00000580170	ENSG00000173482	PTPRM	0.007066	0	0	0	0	0	0	0	0
ENST00000381728	ENSG00000120158	RCL1	0.007064	0	0	0	0	0	0	0	0
ENST00000382722	ENSG00000151062	CACNA2D4	0.007023	0.000259	0	0.00014	0	0	0	0	0
ENST00000368820	ENSG00000213171	LINGO4	0.006996	0	0	0	0	0	0	0	0
ENST00000638317	ENSG00000109911	ELP4	0.006938	0	0	0.001273	0	0	0	0	0.002242
ENST00000424508	ENSG00000100364	KIAA0930	0.006922	0	0	0	0	0	0	0	0
ENST00000431965	ENSG00000134042	MRO	0.006911	0.00367	0	0	0	0	0	0	0
ENST00000222728	ENSG00000106006	HOXA6	0.006908	0	0	0	0	0	0	0	0
ENST00000401985	ENSG00000213316	LTC4S	0.006828	0	0	0	0	0	0	0	0
ENST00000467211	ENSG00000273047	AL121845.2	0.006648	0	0	0	0	0	0	0	0
ENST00000548919	ENSG00000079337	RAPGEF3	0.006643	0	0	0	0	0	0	0	0.003087
ENST00000421113	ENSG00000002822	MAD1L1	0.006613	0	0	0	0	0	0	0	0
ENST00000343366	ENSG00000187492	CDHR4	0.006588	0	0	0	0	0	0	0	0
ENST00000373615	ENSG00000106689	LHX2	0.006566	0	0	0	0	0	0	0	0
ENST00000564654	ENSG00000070729	CNGB1	0.006544	0	0	0	0	0	0	0	0
ENST00000426933	ENSG00000120451	SNX19	0.006522	0	0	0	0	0.002339	0	0.002339	0
ENST00000303324	ENSG00000168131	OR2B2	0.006501	0	0	0	0	0	0	0	0
ENST00000417187	ENSG00000169255	B3GALNT1	0.006491	0	0	0	0	0.001213	0.002399	0.001213	0
ENST00000261592	ENSG00000101746	NOL4	0.006465	0	0	0	0	0	0	0	0.002731
ENST00000643252	ENSG00000126091	ST3GAL3	0.006417	0	0	0	0	0	0	0	0
ENST00000647022	ENSG00000163632	C3orf49	0.00641	0	0	0	0	0	0	0	0
ENST00000297354	ENSG00000164764	SBSPON	0.006392	0	0	0	0	0	0	0	0
ENST00000621387	ENSG00000164078	MST1R	0.006381	0	0	0	0	0	0	0	0
ENST00000431505	ENSG00000141314	RHBDL3	0.006378	0	0	0	0	0	0	0	0
ENST00000612068	ENSG00000181786	ACTL9	0.006377	0	0	0	0	0	0	0	0
ENST00000559515	ENSG00000134152	KATNBL1	0.006353	0.000378	0	0	0.000747	1.3e-05	0.001436	1.3e-05	0
ENST00000446876	ENSG00000068024	HDAC4	0.006335	0	0	0	0	0.001651	0	0.001651	0
ENST00000637228	ENSG00000185271	KLHL33	0.00626	0	0	0	0	0	0	0	0
ENST00000270590	ENSG00000142511	GPR32	0.006209	0	0	0	0	0	0	0	0
ENST00000643607	ENSG00000125337	KIF25	0.006201	0	0	0	0	0	0	0	0
ENST00000482954	ENSG00000090266	NDUFB2	0.006146	0	0	0	0.001521	9e-05	0.000619	9e-05	0
ENST00000406420	ENSG00000205639	MFSD2B	0.006131	0	0	0	0	0	0	0	0
ENST00000421545	ENSG00000173809	AC008736.1	0.006121	0	0	0	0	0	0	0	0
ENST00000534725	ENSG00000185803	SLC52A2	0.006032	1e-06	2e-06	2.5e-05	3.8e-05	0.000148	5.3e-05	0.000148	7.1e-05
ENST00000299709	ENSG00000166558	SLC38A8	0.006024	0	0	0	0	0	0	0	0
ENST00000592586	ENSG00000164125	GASK1B	0.005999	0	0	0	0	0	0	0	0
ENST00000592023	ENSG00000012061	ERCC1	0.005948	0.002826	0	0	0	0	0.000519	0	0
ENST00000380956	ENSG00000137265	IRF4	0.005926	0	0	0	0	0.001396	0	0.001396	0
ENST00000543085	ENSG00000021300	PLEKHB1	0.0059	0	0	0	0	0	0	0	0
ENST00000413409	ENSG00000081237	PTPRC	0.005889	0	0	0	0	0	0	0	0
ENST00000401461	ENSG00000159496	RGL4	0.005887	0	0	0	0.003812	0	0	0	0
ENST00000409808	ENSG00000072163	LIMS2	0.005765	0	0	0	0	0	0	0	0
ENST00000614798	ENSG00000173198	CYSLTR1	0.00576	0	0	0	0	0	0	0	0.001781
ENST00000514857	ENSG00000249437	NAIP	0.005634	0	0	0	0	0	0	0	0.000913
ENST00000562373	ENSG00000123358	NR4A1	0.005596	0	0	0	0	0.000684	0.002179	0.000684	0
ENST00000428797	ENSG00000022355	GABRA1	0.005535	0	0	0	0	0	0	0	0
ENST00000382179	ENSG00000174672	BRSK2	0.005482	0	0	0	0	0	0	0	0
ENST00000556147	ENSG00000165795	NDRG2	0.005472	0	0	0	0	0	0	0	0.001766
ENST00000318227	ENSG00000179148	ALOXE3	0.005464	0	0	0	0	0	0	0	0.00236
ENST00000444844	ENSG00000132274	TRIM22	0.005443	0	0	0	0	0	0	0	0
ENST00000521732	ENSG00000112769	LAMA4	0.005407	0	0	0	0	0	0	0	0
ENST00000442986	ENSG00000183621	ZNF438	0.005386	0	0	0	0	0	0	0	0
ENST00000610405	ENSG00000179304	AC234031.1	0.005374	0	0	0	0	0	0	0	0
ENST00000357780	ENSG00000110244	APOA4	0.005356	0	0	0	0	0	0	0	0
ENST00000615307	ENSG00000136367	ZFHX2	0.00535	0	0	0	0	0	0	0	0
ENST00000257552	ENSG00000135097	MSI1	0.005317	0	0	0	0	0	0	0	0
ENST00000641486	ENSG00000226288	OR52I2	0.0053	0	0	0	0	0	0	0	0
ENST00000552066	ENSG00000123329	ARHGAP9	0.00524	0	0	0	0	0.000607	0	0.000607	0
ENST00000494733	ENSG00000171914	TLN2	0.005226	0	0	0	0.000197	0	0	0	0.001064
ENST00000260264	ENSG00000137709	POU2F3	0.005186	0	0	0	0	0	0	0	0
ENST00000415886	ENSG00000164932	CTHRC1	0.005179	0	0	4.2e-05	0	0	0	0	4.2e-05
ENST00000530356	ENSG00000120451	SNX19	0.005178	0	0	0	0	0	0	0	0
ENST00000581954	ENSG00000141574	SECTM1	0.005138	0	0	0	0	0	0	0	0
ENST00000471196	ENSG00000163848	ZNF148	0.005114	0.001374	0	0	0	0	0	0	0
ENST00000638825	ENSG00000129159	KCNC1	0.00508	0	0	0	0	0	0	0	0
ENST00000567794	ENSG00000166192	SENP8	0.005042	0	0	0	0	0	0	0	0
ENST00000588110	ENSG00000108984	MAP2K6	0.005029	0	0	0	0	0	0	0	0
ENST00000545837	ENSG00000090376	IRAK3	0.00499	0	0	0	0	0	0	0	0
ENST00000352508	ENSG00000165917	RAPSN	0.004969	0	0	0	0	0	0	0	0
ENST00000283025	ENSG00000153060	TEKT5	0.004888	0	0	0	0	0	0	0	0
ENST00000320516	ENSG00000139537	CCDC65	0.004844	0	0	0	0	0	0	0	0
ENST00000502620	ENSG00000174796	THAP6	0.004829	0	0	0	0	0	0	0	0
ENST00000531774	ENSG00000187098	MITF	0.004801	0	0	0	0	0	0	0	0
ENST00000508623	ENSG00000151552	QDPR	0.004778	0	0	0	0.001602	0	0	0	0
ENST00000464963	ENSG00000214946	TBC1D26	0.004709	0	0	0	0	0	0	0	0
ENST00000472139	ENSG00000143801	PSEN2	0.004705	0	0	0	0	0	0	0	0
ENST00000314744	ENSG00000181965	NEUROG1	0.004682	0	0	0	0	0	0	0	0
ENST00000524115	ENSG00000165066	NKX6-3	0.004682	0	0	0	0	0	0	0	0
ENST00000641275	ENSG00000176231	OR10H4	0.004652	0	0	0	0	0	0	0	0
ENST00000636182	ENSG00000266094	RASSF5	0.004631	0	0	0	0.002368	0	0	0	0
ENST00000617084	ENSG00000183662	FAM19A1	0.004625	0	0	0	0	0	0	0	0
ENST00000298375	ENSG00000165568	AKR1E2	0.004624	0	0	0	0	0	0	0	0
ENST00000611959	ENSG00000026297	RNASET2	0.004585	0	0	0	0	0	0	0	0
ENST00000374415	ENSG00000114948	ADAM23	0.004568	0	0.001495	0	0	0	0	0	0.00128
ENST00000592014	ENSG00000214140	PRCD	0.004564	0	0	0	0	0	0	0	0
ENST00000494905	ENSG00000166278	C2	0.004508	0	0	0	0	0	0	0	0
ENST00000613740	ENSG00000145242	EPHA5	0.004506	0	0	0	0	0	0	0	0
ENST00000412911	ENSG00000124222	STX16	0.004497	0	0	0	0	0	0	0	0
ENST00000525897	ENSG00000185090	MANEAL	0.004425	0	0.001902	0	0	0	0	0	0
ENST00000407614	ENSG00000183569	SERHL2	0.004385	0	0	0.002214	0	0	0	0	0
ENST00000574081	ENSG00000161929	SCIMP	0.004372	0	0	0	0	0	0	0	0
ENST00000283547	ENSG00000153495	TEX29	0.00432	0	0	0	0	0	0	0	0
ENST00000360374	ENSG00000198283	OR5B21	0.004232	0	0	0	0	0	0	0	0
ENST00000299443	ENSG00000166351	POTED	0.004229	0	0	0	0	0	0	0	0
ENST00000642449	ENSG00000101425	BPI	0.004224	0	0	0	0	0	0	0	0
ENST00000358066	ENSG00000137872	SEMA6D	0.004186	0	0	0	0	0	0	0	0
ENST00000546203	ENSG00000136811	ODF2	0.004185	0	0	0	0	0	0	0	0
ENST00000241356	ENSG00000282608	ADORA3	0.004182	0	0.002452	0	0	0	0	0	0
ENST00000549540	ENSG00000072041	SLC6A15	0.00417	0	0	0	0	0	0	0	0
ENST00000630991	ENSG00000187391	MAGI2	0.004168	0	0	0	0	0	0	0	0.001662
ENST00000560804	ENSG00000028277	POU2F2	0.004125	0	0	0	0	0	0	0	0.00234
ENST00000368808	ENSG00000154485	MMP21	0.004106	0	0	0	0	0	0	0	0
ENST00000640523	ENSG00000156113	KCNMA1	0.004101	0	0	0	0	0	0	0	0
ENST00000579687	ENSG00000108622	ICAM2	0.004091	0	0	0	0	0	0	0	0
ENST00000341594	ENSG00000131018	SYNE1	0.004079	0	0.000189	5.2e-05	0	0.000378	0	0.000378	0
ENST00000522257	ENSG00000066827	ZFAT	0.00407	0	0	0	0	0	0	0	0
ENST00000590559	ENSG00000105270	CLIP3	0.004068	0	0	0	0	0	0	0	0
ENST00000399137	ENSG00000159261	CLDN14	0.004044	0	0	0	0	0	0	0	0
ENST00000478951	ENSG00000144834	TAGLN3	0.003964	0	0	0	0	0	0	0	0
ENST00000470044	ENSG00000162039	MEIOB	0.003953	0	0	0	0	0	0	0	0
ENST00000456986	ENSG00000049759	NEDD4L	0.003941	0	0	0	0	0	0	0	0
ENST00000639435	ENSG00000270181	BIVM-ERCC5	0.003902	0	0	0	0	0	0	0	0
ENST00000367935	ENSG00000171722	SPATA46	0.003895	0	0	0	0	0	0	0	0
ENST00000651232	ENSG00000173898	SPTBN2	0.003888	0	0	0	0	0	0	0	0
ENST00000341130	ENSG00000188051	TMEM221	0.00388	0	0	0	0	0	0	0	0
ENST00000239174	ENSG00000120094	HOXB1	0.003874	0	0	0	0	0	0	0	0
ENST00000423771	ENSG00000196872	KIAA1211L	0.003874	0	0	0	0	0	0	0	0
ENST00000645445	ENSG00000127990	SGCE	0.003832	0	0	0	0	0	0	0	0
ENST00000326621	ENSG00000019102	VSIG2	0.003821	0.001149	0	0	0	0	0	0	0
ENST00000392569	ENSG00000186815	TPCN1	0.003821	0	0	0	0	0	0	0	0
ENST00000649911	ENSG00000095637	SORBS1	0.003819	0	0	0	0	0	0	0	0
ENST00000454778	ENSG00000128294	TPST2	0.003791	0	0	0	0	0	0	0	0
ENST00000441088	ENSG00000101849	TBL1X	0.003763	0	0	0	0	0	4e-06	0	0.00061
ENST00000333279	ENSG00000183831	ANKRD45	0.003692	0	0	0	0	0	0	0	0
ENST00000447607	ENSG00000198125	MB	0.003519	0	0	0	0	0	0	0	0
ENST00000464668	ENSG00000158234	FAIM	0.003515	0	0	0	0	0	0	0	0
ENST00000591529	ENSG00000065717	TLE2	0.003514	0	0	0	0	0	0	0	0
ENST00000512336	ENSG00000204580	DDR1	0.003497	0	0	0	0	0	0	0	0
ENST00000374970	ENSG00000188452	CERKL	0.003491	0	0	0	0	0	0	0	0
ENST00000567483	ENSG00000177548	RABEP2	0.003476	0	0	0	0	0	0	0	0
ENST00000306324	ENSG00000170166	HOXD4	0.003468	0	0	0	0	0	0	0	0
ENST00000616056	ENSG00000100336	APOL4	0.003453	0	0	0	0	0	0	0	0
ENST00000264343	ENSG00000138639	ARHGAP24	0.003447	0	0	0	0	0.001622	0.000225	0.001622	2.2e-05
ENST00000652225	ENSG00000134899	ERCC5	0.003444	0	0	0	0	0	0	0	0
ENST00000274576	ENSG00000145888	GLRA1	0.003429	0	0	0	0	0	0	0	0
ENST00000591787	ENSG00000168259	DNAJC7	0.003422	0	0	0	0	0	0	0	0.002291
ENST00000407144	ENSG00000180891	CUEDC1	0.003409	0	0	0	0	0.000339	0.00117	0.000339	0
ENST00000399947	ENSG00000156265	MAP3K7CL	0.003386	0	0	0	0	0	0	0	0
ENST00000456349	ENSG00000108381	ASPA	0.003379	0	0	0	0	0	0	0	0
ENST00000513628	ENSG00000133835	HSD17B4	0.003379	0	0	0	0	0	0	0	0
ENST00000368419	ENSG00000163357	DCST1	0.003345	0	0	0	0	0	0	0	0
ENST00000449198	ENSG00000139910	NOVA1	0.003344	0	0	0	0	0	0	0	0
ENST00000429976	ENSG00000168016	TRANK1	0.003329	0	0	0	0	0	0	0	0
ENST00000494177	ENSG00000148297	MED22	0.003267	0	0	0	0	0	0	0	0
ENST00000462215	ENSG00000185499	MUC1	0.003266	0	0	0	0	0	0	0	0
ENST00000520050	ENSG00000254087	LYN	0.003247	0	0	0	0	0	0	0	0
ENST00000644798	ENSG00000149970	CNKSR2	0.003244	0	0	0	0	0	0	0	0
ENST00000304411	ENSG00000170837	GPR27	0.00322	0	0	0	0	0	0	0	0
ENST00000642108	ENSG00000279000	OR10A6	0.003219	0.000117	0.000151	0	0	0	0	0	0
ENST00000537233	ENSG00000262246	CORO7	0.003213	0	0	0	0.000206	0	5e-06	0	0
ENST00000456379	ENSG00000185615	PDIA2	0.003208	0	0	0	0	0	0	0	0
ENST00000645603	ENSG00000090534	THPO	0.003182	0	0	0	0	0	0	0	0
ENST00000381535	ENSG00000100321	SYNGR1	0.003164	0	0	0	0	0	0	0	0
ENST00000533447	ENSG00000023697	DERA	0.003111	0	0	0	0	0	0	0	0
ENST00000524847	ENSG00000149269	PAK1	0.003106	0	0	0	0	0	0	0	0
ENST00000266066	ENSG00000120057	SFRP5	0.003097	0	0	0	0	0	0	0	0
ENST00000612786	ENSG00000082556	OPRK1	0.003033	0	0	0	0	0	0	0	0
ENST00000378123	ENSG00000204962	PCDHA8	0.003012	0	0	0	0.000882	0	0	0	0
ENST00000375692	ENSG00000186510	CLCNKA	0.002992	0	0	0	0	0	0	0	0
ENST00000345005	ENSG00000179335	CLK3	0.002976	0	0	0	0	0	0	0	0.001382
ENST00000291759	ENSG00000239961	LILRA4	0.002946	0	0	0	0	0	0	0	0
ENST00000339673	ENSG00000152592	DMP1	0.002938	0	0	0	0	0	0	0	0
ENST00000600209	ENSG00000130475	FCHO1	0.002918	0	0	0	0	0	0	0	0
ENST00000371180	ENSG00000162604	TM2D1	0.002916	0	0	0	0	9e-06	6e-06	9e-06	0.000852
ENST00000284311	ENSG00000154165	GPR15	0.002914	0	0	0	0	0	0	0	0
ENST00000652669	ENSG00000169255	B3GALNT1	0.002904	0	4.7e-05	0	1.2e-05	0	0	0	0
ENST00000576985	ENSG00000130182	ZSCAN10	0.002901	0	0	0	0	0	0	0	0
ENST00000473854	ENSG00000284862	CCDC39	0.002879	0	0	0	0	0	0	0	0
ENST00000261731	ENSG00000089116	LHX5	0.002877	0	0	0	0	0	0	0	0
ENST00000520475	ENSG00000169398	PTK2	0.002857	0	0	0	0	0	0	0	0
ENST00000644644	ENSG00000068615	REEP1	0.00284	0	0	0	0	0	0	0	0
ENST00000371129	ENSG00000132855	ANGPTL3	0.002809	0	0	0	0	0	0	0	0
ENST00000389019	ENSG00000205359	SLCO6A1	0.002807	0	0	0	0	0	0	0	0
ENST00000309279	ENSG00000124177	CHD6	0.002804	0	0	0	0	0.000681	0.000244	0.000681	0
ENST00000379984	ENSG00000102104	RS1	0.002804	0	0	0	0	0	0	0	0
ENST00000436817	ENSG00000156515	HK1	0.002801	0	0	0	3.4e-05	4.9e-05	0	4.9e-05	0
ENST00000517434	ENSG00000253731	PCDHGA6	0.0028	0	0	0.00018	0	0	0	0	0
ENST00000402550	ENSG00000138028	CGREF1	0.00278	0	0	0	0	0	0	0	0
ENST00000563291	ENSG00000167522	ANKRD11	0.002771	0	0	0	0	0	0	0	0
ENST00000645500	ENSG00000149231	CCDC82	0.002733	0	0	0	0	0	0	0	0
ENST00000608263	ENSG00000124092	CTCFL	0.002724	0	0	0	0	0	0	0	0
ENST00000312988	ENSG00000152086	TUBA3E	0.002723	0	0	0	0	0	0	0	0
ENST00000432298	ENSG00000004866	ST7	0.002693	0	0	0	0	0	0	0	0.001694
ENST00000592773	ENSG00000198597	ZNF536	0.00267	0	0	0	0	0	0	0	0
ENST00000309060	ENSG00000174306	ZHX3	0.002589	0	0	0	4.3e-05	0	0	0	0
ENST00000273283	ENSG00000055957	ITIH1	0.002587	0	0	0	0	0	0	0	0
ENST00000282701	ENSG00000152785	BMP3	0.002587	0	0	0	0	0.001218	0	0.001218	0
ENST00000355300	ENSG00000169783	LINGO1	0.002579	0	0	0	0	0	0	0	0
ENST00000508208	ENSG00000164168	TMEM184C	0.002578	0	0	0	0	0	0	0	0
ENST00000338647	ENSG00000189420	ZFP92	0.002564	0	0	0	0	0	0	0	0.001172
ENST00000510219	ENSG00000005882	PDK2	0.002553	0	0	0	0	0	0	0	0
ENST00000272224	ENSG00000143869	GDF7	0.002551	0	0	0	0	0	0	0	0
ENST00000540587	ENSG00000214530	STARD10	0.002542	0	0	0	0	0	0	0	0
ENST00000216733	ENSG00000100842	EFS	0.002541	0	0	0	0	0	0	0	0
ENST00000273352	ENSG00000144820	ADGRG7	0.002519	0	0	0	0	0	0	0	0.000644
ENST00000277531	ENSG00000130653	PNPLA7	0.002507	0	0	0	0	0	0.000775	0	0
ENST00000542644	ENSG00000155026	RSPH10B	0.002504	0	0	0	0	0	0	0	0
ENST00000358864	ENSG00000149488	TMC2	0.002486	0	0	0	0	0	0	0	0
ENST00000563755	ENSG00000175267	VWA3A	0.002468	0	0	0	0	0	0	0	0
ENST00000297267	ENSG00000164694	FNDC1	0.002407	0	0	0	0	0	0	0	0
ENST00000621518	ENSG00000149294	NCAM1	0.002401	0	0	0	0	0	0	0	0
ENST00000260723	ENSG00000138152	BTBD16	0.002351	0	0	0	0	0	0	0	0
ENST00000562729	ENSG00000166664	CHRFAM7A	0.002292	0	0	0	0	0	0	0	0.000958
ENST00000373760	ENSG00000114923	SLC4A3	0.002286	0	0	0	0	0	0	0	0
ENST00000342754	ENSG00000162614	NEXN	0.002284	0.000181	0.000489	1e-06	0	0.000112	0.000105	0.000112	0
ENST00000378122	ENSG00000204961	PCDHA9	0.002284	0	0	0	0	0	0.001358	0	0
ENST00000506111	ENSG00000174123	TLR10	0.002276	0	0	0	0	0	0	0	0
ENST00000619650	ENSG00000121988	ZRANB3	0.002271	0	0	0	0	0	0	0	0
ENST00000633306	ENSG00000185040	SPDYE16	0.002258	0	0	0	0	0	0	0	0
ENST00000382255	ENSG00000173253	DMRT2	0.002239	0	0	0	0	0	0	0	0
ENST00000528453	ENSG00000070985	TRPM5	0.002232	0	0	0	0	0	0	0	0
ENST00000645284	ENSG00000187017	ESPN	0.002224	0	0	0	0	0	0	0	0
ENST00000637838	ENSG00000152208	GRID2	0.00215	0	0	0	0	0	0	0	0
ENST00000301295	ENSG00000160505	NLRP4	0.002147	0	0	0	0	0	0	0	0
ENST00000403305	ENSG00000128346	C22orf23	0.00214	3.5e-05	0	2.9e-05	0	0	0	0	0
ENST00000517362	ENSG00000133943	DGLUCY	0.002138	0	0	0	0	0	0	0	0
ENST00000583658	ENSG00000073350	LLGL2	0.002135	0	0	0	0	0	0	0	0
ENST00000536633	ENSG00000147689	FAM83A	0.002129	0	0	0	0	0	0	0	0
ENST00000481065	ENSG00000181847	TIGIT	0.002124	0	0	0	0	0	0	0	0
ENST00000492341	ENSG00000161249	DMKN	0.002106	0	0	0	0	0	0	0	0
ENST00000549797	ENSG00000185046	ANKS1B	0.002105	0	0	0	0	0	0	0	0
ENST00000625927	ENSG00000060971	ACAA1	0.002057	0	0	0	0	0	0	0	0
ENST00000241453	ENSG00000122025	FLT3	0.002051	0	0	0	0	0	0	0	0
ENST00000368912	ENSG00000143434	SEMA6C	0.002049	0	0	0	0	0	0	0	0
ENST00000619142	ENSG00000174428	GTF2IRD2B	0.002039	0	0.000537	0	0	0	0	0	0
ENST00000643689	ENSG00000196628	TCF4	0.002035	0	0	0	0	0	0	0	0
ENST00000539778	ENSG00000153815	CMIP	0.002032	0	0	0	0	0	0	0	0
ENST00000611073	ENSG00000197181	PIWIL2	0.002028	0	0	0	0	0	0	0	0
ENST00000547477	ENSG00000139209	SLC38A4	0.002027	0	0	0	0	0	0	0	0
ENST00000641278	ENSG00000172742	OR4D9	0.002002	0	0	0	0	0	0	0	0
ENST00000652274	ENSG00000162374	ELAVL4	0.00197	0	0	0	0	0	0	0	0
ENST00000393842	ENSG00000067842	ATP2B3	0.001939	0	0	0	0	0	0	0	0
ENST00000606498	ENSG00000162604	TM2D1	0.001929	0	0	0	0	0	0	0	1e-06
ENST00000274979	ENSG00000146205	ANO7	0.001909	0	0	0	0	0	0	0	0
ENST00000436341	ENSG00000100060	MFNG	0.001876	0	0	0	0	0	0	0	0
ENST00000382812	ENSG00000165475	CRYL1	0.001874	0	0	0	0	0	0	0	0
ENST00000506151	ENSG00000250745	USP17L20	0.001855	0	0	0	0	0	0	0	0.000437
ENST00000567648	ENSG00000103043	VAC14	0.001836	0	0	0	0	0	0	0	0
ENST00000229771	ENSG00000112041	TULP1	0.001822	0	0	0	0	0	0	0	0
ENST00000359562	ENSG00000164107	HAND2	0.001821	0	0	0	0	0	0	0	0
ENST00000405767	ENSG00000170340	B3GNT2	0.001811	0	0	0	0	0.000995	0	0.000995	0
ENST00000419482	ENSG00000115593	SMYD1	0.001797	0	0	0	0	0	0	0	0
ENST00000262593	ENSG00000101134	DOK5	0.001796	0	0	0	0	0	0	0	0
ENST00000583874	ENSG00000265190	ANXA8	0.001793	0	0	0	0	0	0	0	0
ENST00000518937	ENSG00000076554	TPD52	0.001759	0	0	0	0	0	0	0	0
ENST00000335762	ENSG00000151067	CACNA1C	0.00173	0	0	0	0	0	0	0	0
ENST00000301365	ENSG00000167723	TRPV3	0.00173	0	0	0	0	0	0	0	0
ENST00000620997	ENSG00000120500	ARR3	0.001705	0	0	0	0	0	0	0	0
ENST00000281772	ENSG00000144445	KANSL1L	0.001695	0	0	0	0	0	0	0	0
ENST00000509434	ENSG00000145414	NAF1	0.001664	0	0	0	0	0.000945	0	0.000945	0
ENST00000634658	ENSG00000164588	HCN1	0.001657	0	0	0	0	0	0	0	0
ENST00000427506	ENSG00000063660	GPC1	0.00165	0	0	0	0	0.000302	0	0.000302	0
ENST00000588928	ENSG00000131477	RAMP2	0.001639	0	0	0	0	0	0	0	0
ENST00000543233	ENSG00000179242	CDH4	0.001633	0	0	0	0	0	0	0	0
ENST00000642009	ENSG00000109339	MAPK10	0.001628	0	0	0	0	0	0	0	0
ENST00000347776	ENSG00000102547	CAB39L	0.001604	0	0	0	0	0	0	0	0
ENST00000446946	ENSG00000165092	ALDH1A1	0.001599	0	0	0	0	0	0	0	0
ENST00000642627	ENSG00000165699	TSC1	0.001598	0	0	0	0.000506	0.000402	0	0.000402	0
ENST00000367957	ENSG00000132185	FCRLA	0.001577	0	0	0	0	0	0	0	0
ENST00000402174	ENSG00000183579	ZNRF3	0.001576	0	0	0	0	0	0	0	0
ENST00000568214	ENSG00000167191	GPRC5B	0.001572	0	0	0	0	0	0	0	0
ENST00000460056	ENSG00000171509	RXFP1	0.001563	0	0	0	0	0	0	0	0
ENST00000413473	ENSG00000085831	TTC39A	0.001542	0	0	0	0	0	0	0	0
ENST00000397827	ENSG00000166664	CHRFAM7A	0.001539	0	0	0	0	0	0	0	0
ENST00000411532	ENSG00000100325	ASCC2	0.001539	0	0	0	0	0	0	0	0
ENST00000467177	ENSG00000137266	SLC22A23	0.001527	0	0	0	0	0	0	0	0
ENST00000369210	ENSG00000165863	C10orf82	0.001498	0	0	0	0	0	0	0	0
ENST00000456769	ENSG00000146826	C7orf43	0.001463	0	0	0	0	0	0	0	0
ENST00000546243	ENSG00000126351	THRA	0.001445	0	0	0	0	0	0	0	0
ENST00000366898	ENSG00000185345	PRKN	0.001427	0.000927	0	0	0	0	0	0	0
ENST00000417669	ENSG00000186732	MPPED1	0.001413	0	0	0	0	0	0	0	0
ENST00000543500	ENSG00000256222	MTRNR2L3	0.001399	0	0	0	0	0	0	0	0
ENST00000344384	ENSG00000165192	ASB11	0.001394	0	0	0	0	0	0	0	0
ENST00000381054	ENSG00000174718	RESF1	0.00139	0	0	0	0	0	0	0	0.000711
ENST00000425217	ENSG00000171435	KSR2	0.00139	0	0	2.8e-05	0	0	5e-05	0	0
ENST00000647417	ENSG00000145949	MYLK4	0.001385	0.00014	0	0	0	0	0	0	0
ENST00000627604	ENSG00000186184	POLR1D	0.00138	0	0	0	0	0	0	0	0
ENST00000457474	ENSG00000139436	GIT2	0.001372	6.2e-05	0	0	3.5e-05	0.000341	8.2e-05	0.000341	9.4e-05
ENST00000622654	ENSG00000218819	TDRD15	0.001357	0	0	0	0	0.000609	0	0.000609	0
ENST00000587848	ENSG00000181626	ANKRD62	0.00135	0	0	0	0	0	0	0	0
ENST00000416500	ENSG00000136167	LCP1	0.001347	0	0	0	0	0	0	0	0
ENST00000055682	ENSG00000050030	NEXMIF	0.001345	0	0	0	0	0	0	0	0
ENST00000611815	ENSG00000136169	SETDB2	0.001344	7.3e-05	0	0	0	0	0	0	0
ENST00000291592	ENSG00000160233	LRRC3	0.001344	0	0	0	0	0	0	0	0
ENST00000528535	ENSG00000146426	TIAM2	0.001333	0	0	0	0	0	0	0	0
ENST00000641868	ENSG00000171180	OR2M4	0.001328	0	0	0	0	0	0	0	0
ENST00000536215	ENSG00000155974	GRIP1	0.001311	0	0	0	0	0	0	0	0
ENST00000586448	ENSG00000132874	SLC14A2	0.001309	0	0	0	0	0	0	0	0
ENST00000414914	ENSG00000106415	GLCCI1	0.00129	0	0	0	0	0	0	0	0
ENST00000467908	ENSG00000160209	PDXK	0.001289	0	0	0	0	0.000286	0	0.000286	0
ENST00000615603	ENSG00000114861	FOXP1	0.001263	0	0	0	0	0	0	0	0
ENST00000502320	ENSG00000189157	FAM47E	0.001261	2.6e-05	0	0	0	0	0	0	0
ENST00000503143	ENSG00000251380	DCANP1	0.001257	0	0	0	0	0	0	0	0
ENST00000401533	ENSG00000157833	GAREM2	0.00124	0	0	0	0	0	0	0	0
ENST00000339861	ENSG00000187764	SEMA4D	0.001228	0	0	0	0	0	0	0	0
ENST00000342266	ENSG00000118507	AKAP7	0.001217	0	0	0	0	0	0	0	0
ENST00000439697	ENSG00000148308	GTF3C5	0.001211	0	0	0	0	0	0	0	0
ENST00000373103	ENSG00000119535	CSF3R	0.001126	0	0	0	0	0	0	0	0
ENST00000615867	ENSG00000159618	ADGRG5	0.001111	0	0	0	0	0	0	0	0
ENST00000360348	ENSG00000079102	RUNX1T1	0.001105	0	0	0	0	0	0	0	0
ENST00000321322	ENSG00000177103	DSCAML1	0.001094	0	0	0	0	0	0	0	0
ENST00000291539	ENSG00000160191	PDE9A	0.001087	0	0	0	0	0	0	0	0
ENST00000555516	ENSG00000100815	TRIP11	0.00108	0	0	0	0	0	0	0	0
ENST00000359237	ENSG00000170965	PLAC1	0.001056	0	0	0	0	0	0	0	0
ENST00000310193	ENSG00000172817	CYP7B1	0.001056	0	0	0	0	0	0	0	0
ENST00000646453	ENSG00000132849	PATJ	0.001039	0	0	0	0	0	0	0	0
ENST00000280330	ENSG00000150756	ATPSCKMT	0.00103	0.000307	0	0	0	0	0	0	0
ENST00000396365	ENSG00000244482	LILRA6	0.001028	0	0	0	0	0	0	0	0
ENST00000443232	ENSG00000163026	WDCP	0.001028	0	0	0	0	0.000352	0	0.000352	0
ENST00000370490	ENSG00000185985	SLITRK2	0.001024	0	0	0	0	0	0	0	0
ENST00000264868	ENSG00000091490	SEL1L3	0.001009	0	0	0	0	0	0	0	0
ENST00000377572	ENSG00000197891	SLC22A12	0.001002	0	0	0	0	0	0	0	0
ENST00000457059	ENSG00000158560	DYNC1I1	0.000999	0	0	0	0	0	0	0	0
ENST00000512430	ENSG00000196455	PIK3R4	0.000998	0	0	0	0	0	0	0	0
ENST00000261897	ENSG00000110844	PRPF40B	0.000968	0	0	0	0	0	0	0	0
ENST00000437268	ENSG00000184792	OSBP2	0.000948	0	0	0	0	0	0	0	0
ENST00000252087	ENSG00000240764	PCDHGC5	0.000941	0	0	0	0	0	0	0	0
ENST00000585509	ENSG00000108669	CYTH1	0.000937	0	0	0	0.000436	0	0	0	0
ENST00000641754	ENSG00000213471	TTLL13P	0.000934	0	0	0	0	0	0	0	0
ENST00000263334	ENSG00000125618	PAX8	0.000923	0	0	0.000367	0	0	0	0	0
ENST00000403222	ENSG00000184792	OSBP2	0.000883	0	0	0	0	0	0	0	0
ENST00000503466	ENSG00000164114	MAP9	0.000879	0	0	0	0	0	0	0	0
ENST00000641288	ENSG00000188000	OR7D2	0.000873	0	0	0	0	0	0	0	0
ENST00000397180	ENSG00000130988	RGN	0.00086	0	0	0	0	0	0	0	0
ENST00000535268	ENSG00000184792	OSBP2	0.000857	0	0	0	0	0	0	0	0
ENST00000415806	ENSG00000145779	TNFAIP8	0.000845	0	0	0	0	0	0	0	0
ENST00000409199	ENSG00000143951	WDPCP	0.000841	0	0	0	0	0.000411	0	0.000411	0
ENST00000556154	ENSG00000140092	FBLN5	0.00084	0	0	0	0	0	0	0	0
ENST00000275246	ENSG00000146426	TIAM2	0.000812	0	0	0	0	0	0	0	0
ENST00000620424	ENSG00000275066	SYNRG	0.000811	0	0.00024	0	5.2e-05	0	0	0	0
ENST00000542990	ENSG00000053702	NRIP2	0.0008	0	0	0	0	0	0	0	0
ENST00000539306	ENSG00000101892	ATP1B4	0.000797	0	0	0	0	0	0	0	0
ENST00000472863	ENSG00000120093	HOXB3	0.000762	0	0	0	0	0	0	0	0
ENST00000372735	ENSG00000198908	BHLHB9	0.000729	0	0	0.000265	0	0	0	0	0
ENST00000613886	ENSG00000079102	RUNX1T1	0.000719	0	0	0	0	0	0	0	0
ENST00000443478	ENSG00000117013	KCNQ4	0.00071	0	0	0	0	0	0	0	0
ENST00000504228	ENSG00000109265	KIAA1211	0.00071	0	0	0	0	0	0	0	0
ENST00000419673	ENSG00000088756	ARHGAP28	0.000691	0	0	0	0	0	0	0	7.4e-05
ENST00000531445	ENSG00000181215	C4orf50	0.000647	0	0	0	0	0	0	0	0
ENST00000545917	ENSG00000139200	PIANP	0.000642	0	0	0	0	0	0	0	0
ENST00000620149	ENSG00000196542	SPTSSB	0.000597	0	0	0	0	0	0	0	0
ENST00000446636	ENSG00000077063	CTTNBP2	0.000592	0	0	0	0	0	0	0	0.00036
ENST00000651147	ENSG00000169255	B3GALNT1	0.000542	0	0	0	1.2e-05	0	0	0	0
ENST00000622037	ENSG00000198838	RYR3	0.000517	0	0	0	0	0	0	0	0
ENST00000453868	ENSG00000119403	PHF19	0.000488	0	0	0.000106	0	0	0	0	0.000196
ENST00000455020	ENSG00000173678	SPDYE2B	0.000452	0	0	0	0	0	0	0	0
ENST00000295612	ENSG00000163412	EIF4E3	0.000437	0	0	0	0	0	0	0	0
ENST00000351659	ENSG00000136717	BIN1	0.000415	0	0	0	0	0	0	0	0
ENST00000289734	ENSG00000029534	ANK1	0.000409	0	0	0	0	0	0	0	0
ENST00000446274	ENSG00000136811	ODF2	0.000404	0	0	0	0	0	0	0	0
ENST00000615889	ENSG00000267795	SMIM22	0.000401	0	0	0	0	0	0	0	0
ENST00000261187	ENSG00000118596	SLC16A7	0.000392	0	0	0	0	0	9.5e-05	0	0
ENST00000321639	ENSG00000181291	TMEM132E	0.000387	0	0	0	0	0	0	0	0
ENST00000440261	ENSG00000164048	ZNF589	0.000379	0	0	0	0	0	0	0	0
ENST00000447293	ENSG00000076864	RAP1GAP	0.000378	0	0	0	0	0	0	0	0
ENST00000542867	ENSG00000111641	NOP2	0.000374	0	0	0.000165	0	0	7e-06	0	0
ENST00000280200	ENSG00000150637	CD226	0.000372	0	0	0	0	0	0	0	0
ENST00000409530	ENSG00000162105	SHANK2	0.000366	0	0	0	0	0	0	0	0
ENST00000510706	ENSG00000164089	ETNPPL	0.000346	0	0	0	0	0	0	0	0
ENST00000569847	ENSG00000167191	GPRC5B	0.000344	0	0	0	0	0	0	0	0
ENST00000415483	ENSG00000100206	DMC1	0.000338	0	0	0	0	0	0	0	0
ENST00000528775	ENSG00000150773	PIH1D2	0.00032	0	0	0	0	0	0	0	0
ENST00000523679	ENSG00000169398	PTK2	0.000307	0	0	0	0	0	0.000144	0	0
ENST00000637660	ENSG00000186197	EDARADD	0.000306	0	0	0	0	0	0	0	0
ENST00000616016	ENSG00000187634	SAMD11	0.000294	0	0	0	0	0	0	0	0
ENST00000334889	ENSG00000134438	RAX	0.000263	0	0	0	0	0	0	0	0
ENST00000636048	ENSG00000131089	ARHGEF9	0.000249	0	0	0	0	0	0	0	0
ENST00000357898	ENSG00000171621	SPSB1	0.000237	0	0	0	0	0	0	0	0
ENST00000479848	ENSG00000158234	FAIM	0.000231	0	0	0	0	0	0	0	0
ENST00000361310	ENSG00000183621	ZNF438	0.00023	0	0	0	0	0	0	0	0
ENST00000485079	ENSG00000258465	AL139011.2	0.000209	0	0	0	0	0	0	0	0
ENST00000351747	ENSG00000174844	DNAH12	0.000203	0	0	0	0	0	0	0	0
ENST00000506101	ENSG00000170153	RNF150	0.000188	0	0	0	0	0	0	0	0
ENST00000379376	ENSG00000101265	RASSF2	0.000155	0	0	0	0	0	0	0	0
ENST00000614754	ENSG00000196588	MRTFA	0.000134	0	0	0	0	0	0	0	0
ENST00000652282	ENSG00000198105	ZNF248	0.000129	0	0	0	0	0	0	0	0
ENST00000621016	ENSG00000039068	CDH1	0.000127	0	0	0	0	0	0	0	0
ENST00000568053	ENSG00000198064	NPIPB13	0.000122	0	0	0	0	0	0	0	0
ENST00000648086	ENSG00000285733	AL031315.1	0.000121	0	0	0	0	0	0	0	0
ENST00000649006	ENSG00000156650	KAT6B	0.000118	0	0	0	0	0	0	0	0
ENST00000560474	ENSG00000157470	FAM81A	0.000118	0	0	0	0	0	0	0	0
ENST00000460170	ENSG00000060656	PTPRU	0.000115	0	0	0	0	0	0	0	2.7e-05
ENST00000512636	ENSG00000152953	STK32B	0.000108	0	0	0	0	0	0	0	0
ENST00000421587	ENSG00000147044	CASK	0.000108	0	0	0	0	0	0	0	0
ENST00000647343	ENSG00000100150	DEPDC5	0.000107	0	0	0	0	0	0	0	0
ENST00000607266	ENSG00000112514	CUTA	0.000103	4e-06	4e-06	2e-06	4e-06	5e-06	1.1e-05	5e-06	8e-06
ENST00000329623	ENSG00000157617	C2CD2	9.9e-05	0	0	0	0	0	0	0	0
ENST00000537981	ENSG00000133318	RTN3	9.3e-05	3.1e-05	0	0	0	0	0	0	0
ENST00000526568	ENSG00000137752	CASP1	6.5e-05	0	0	0	0	0	0	0	0
ENST00000512725	ENSG00000204580	DDR1	5.6e-05	0	0	0	0	0	0	0	0
ENST00000503131	ENSG00000167100	SAMD14	5.4e-05	0	0	0	0	0	0	0	0
ENST00000531901	ENSG00000112319	EYA4	5.2e-05	0	0	0	0	0	0	0	3e-06
ENST00000437412	ENSG00000118495	PLAGL1	5.2e-05	0	0	0	0	0	0	0	0
ENST00000553824	ENSG00000129473	BCL2L2	5.1e-05	0	0	0	0	0	0	0	0
ENST00000599802	ENSG00000083828	ZNF586	4.9e-05	0	0	0	0	0	0	0	0
ENST00000535253	ENSG00000256269	HMBS	4.3e-05	0	0	0	0	0	0	0	0
ENST00000554922	ENSG00000165521	AL121768.1	4.1e-05	0	0	0	0	0	0	0	0
ENST00000449833	ENSG00000162105	SHANK2	2.9e-05	0	0	0	0	0	0	0	0
ENST00000560139	ENSG00000100938	GMPR2	2.9e-05	0	0	0	0	1e-06	0	1e-06	1.7e-05
ENST00000539396	ENSG00000090372	STRN4	2.6e-05	0	0	0	0	0	0	0	0
ENST00000378685	ENSG00000128596	CCDC136	2.4e-05	0	0	0	0	0	0	0	0
ENST00000648263	ENSG00000132535	DLG4	1.6e-05	0	0	0	0	0	0	0	0
ENST00000319010	ENSG00000164855	TMEM184A	1e-05	0	0	0	0	0	0	0	0
ENST00000542192	ENSG00000160325	CACFD1	9e-06	0	0	0	0	0	0	0	1e-06
ENST00000560558	ENSG00000028277	POU2F2	3e-06	0	0	0	0	0	0	0	0
ENST00000529987	ENSG00000110172	CHORDC1	1e-06	0	0	0	0	0	0	0	0
ENST00000624815	ENSG00000076053	RBM7	1e-06	0	0	0	0	0	0	0	0

## Sheet: mRNA_UV_cluster 2
transcript_id	gene_id	gene_name	C_0	UV_3	UV_6	UV_9	UV_12	UV_24	UV_48	UV_24	UV_96
ENST00000524245	ENSG00000164919	COX6C	0	42.0517	0	0.004605	0	0.141923	0.04637	0.141923	0
ENST00000421376	ENSG00000140859	KIFC3	0.0349	19.6295	0.073334	0.041364	0.022509	0.089698	0.045588	0.089698	0.007752
ENST00000404530	ENSG00000162959	MEMO1	0.007056	11.6966	0.018622	0.082373	0.022556	0.052955	0.03983	0.052955	0.018023
ENST00000468777	ENSG00000114054	PCCB	0.252965	11.5081	0.617109	0.699251	0.614567	0	0.707812	0	0.05785
ENST00000518995	ENSG00000147677	EIF3H	0.197492	10.1106	0	0.014901	0	0	1.26868	0	0.098251
ENST00000296805	ENSG00000164347	GFM2	0.189357	10.078	0.159537	0.535993	0.826257	0.165917	0.1963	0.165917	0.159501
ENST00000425265	ENSG00000155366	RHOC	0	9.72399	0.701261	0	0.028649	0	0	0	0.557127
ENST00000451764	ENSG00000196141	SPATS2L	0.108038	9.27414	0.05084	0.13314	0.009437	0.170933	0.659851	0.170933	0.043282
ENST00000415083	ENSG00000141380	SS18	0.259574	9.19707	0.05255	0.625318	0.060185	0.06494	0.1007	0.06494	0.103188
ENST00000359783	ENSG00000196704	AMZ2	2.2809	9.09931	0.94104	0	0.348104	0	0	0	0
ENST00000641074	ENSG00000092621	PHGDH	0	7.68464	0	3.15794	0	0	0	0	0
ENST00000295920	ENSG00000163655	GMPS	0.306551	7.43519	0.152892	0.217313	0.057025	0.769452	0.695514	0.769452	0.186354
ENST00000369556	ENSG00000164414	SLC35A1	0.623448	6.72914	0.023325	0.077307	0	0.383884	0.534259	0.383884	0.885077
ENST00000389834	ENSG00000103978	TMEM87A	0	5.81409	0	0	4e-06	0	0	0	0
ENST00000409338	ENSG00000257529	RPL36A-HNRNPH2	0	5.78319	0.550315	0.293275	0.412839	0.653184	0	0.653184	0.119802
ENST00000503016	ENSG00000109180	OCIAD1	0	5.74764	0	0	0	0	0	0	1.64752
ENST00000409368	ENSG00000116030	SUMO1	0.061973	5.62795	0.018806	0.015816	0.004964	0.009365	0.027792	0.009365	0.052343
ENST00000541050	ENSG00000110880	CORO1C	0.009142	5.48206	0.024517	0.016218	0.01875	0.04554	0	0.04554	0
ENST00000652501	ENSG00000140694	PARN	0.015048	4.92476	0	0	0	0.006946	0	0.006946	0.090836
ENST00000610773	ENSG00000141127	PRPSAP2	0.377011	4.59913	0.0474	0.111911	0	0.319302	0.151786	0.319302	0
ENST00000492406	ENSG00000138459	SLC35A5	0.03002	3.84772	0.002129	0.113966	0.07066	0.315483	0.039635	0.315483	0.001221
ENST00000602382	ENSG00000102977	ACD	0	3.79442	0	1.66982	0	0	0.006149	0	0.040624
ENST00000553423	ENSG00000197102	DYNC1H1	0.008496	3.6831	0.052384	0.001456	0.058144	0.09113	0.02427	0.09113	0.012725
ENST00000456667	ENSG00000100938	GMPR2	0.053699	3.44816	0	0.077865	0.088513	0	0	0	0.291292
ENST00000424646	ENSG00000113580	NR3C1	0	3.31978	0	0	0	0	0	0	0
ENST00000383589	ENSG00000101557	USP14	0	3.28417	0	0	0	0	0	0	0
ENST00000524931	ENSG00000150787	PTS	0.00755	3.23711	0.005532	0.0024	0.018242	0.003055	0.028295	0.003055	0.012736
ENST00000503431	ENSG00000154277	UCHL1	0	3.16161	0.024134	0	0	0.011474	0	0.011474	0.707354
ENST00000576955	ENSG00000040633	PHF23	0	3.08042	0	0.018334	0	0.014173	0	0.014173	0
ENST00000353546	ENSG00000101199	ARFGAP1	5e-06	3.00815	0	0	0	0	0	0	0
ENST00000593054	ENSG00000130811	EIF3G	0	2.74071	0	0	0	0	0	0	0
ENST00000638607	ENSG00000171763	SPATA5L1	0.001437	2.73436	0.024416	0.054782	0.197887	0.157609	0.042871	0.157609	0.016232
ENST00000394104	ENSG00000165219	GAPVD1	0.019496	2.50789	0.001757	0.036884	0.032839	0.088204	0.028623	0.088204	0.002956
ENST00000367055	ENSG00000112096	SOD2	0.035839	2.48476	0.223405	0.03943	0.087278	0.001245	0.039798	0.001245	0.002651
ENST00000424085	ENSG00000134644	PUM1	0	2.30424	0	0.089158	0	0	0	0	0
ENST00000400952	ENSG00000185842	DNAH14	0.001313	2.26485	0.074541	0.020748	0.00141	0.027509	6e-06	0.027509	0.212978
ENST00000266095	ENSG00000241878	PISD	0.367652	2.21099	0	0.366527	0	0	0	0	0
ENST00000561958	ENSG00000141002	TCF25	0	2.11881	0	0	0	0	0	0	0
ENST00000358502	ENSG00000128335	APOL2	0.002382	2.03811	0.002828	0.001399	0.004289	0.005063	0.003932	0.005063	0.0052
ENST00000368302	ENSG00000116586	LAMTOR2	0.134547	2.03237	0.164188	0.102279	0.14751	0.026268	0.050955	0.026268	0.028236
ENST00000396335	ENSG00000069966	GNB5	0	2.0036	0	0	0	0	0	0	0
ENST00000423817	ENSG00000089327	FXYD5	0	1.99628	0	0	0	0	0	0	0
ENST00000451119	ENSG00000165804	ZNF219	0.013095	1.83554	0.008768	0.01663	0.02828	0.037351	0.16347	0.037351	0.006774
ENST00000600428	ENSG00000125733	TRIP10	0	1.77135	0.127811	0.20656	0.117174	0.192907	0	0.192907	0
ENST00000646960	ENSG00000136104	RNASEH2B	0	1.69699	0.006461	0	0	0	0	0	0
ENST00000599000	ENSG00000105700	KXD1	0.144526	1.64854	0.068013	0.050069	0.064049	0.083838	0.065286	0.083838	0.121825
ENST00000436759	ENSG00000178209	PLEC	0.294938	1.63925	0.001208	0.114067	0.0026	0.003438	0.001829	0.003438	0.001103
ENST00000541961	ENSG00000254986	DPP3	0	1.50108	0	0	0	0	0	0	0
ENST00000506397	ENSG00000109475	RPL34	0	1.47854	0	0	0	0	0.079906	0	0.01726
ENST00000462990	ENSG00000105568	PPP2R1A	0.023416	1.43444	0.026137	0.011699	0.223061	0.01663	0.014861	0.01663	0.017228
ENST00000353414	ENSG00000060718	COL11A1	0	1.3954	0	0	0.336128	0	0	0	0
ENST00000393054	ENSG00000105929	ATP6V0A4	0	1.34108	0.002981	0	0	0	0.001517	0	0.402746
ENST00000396986	ENSG00000148985	PGAP2	0.053197	1.30289	0.040699	0	0.037645	2.4e-05	0.052323	2.4e-05	0.06692
ENST00000375071	ENSG00000158825	CDA	0	1.21993	0	0	0	0	0	0	0
ENST00000557342	ENSG00000119705	SLIRP	0.002454	1.16656	0.000486	0.000895	0.001072	0.00029	0.001867	0.00029	0.000262
ENST00000569636	ENSG00000079616	KIF22	0.004158	1.08401	0	0	0	0.001716	0.008125	0.001716	0.010188
ENST00000371160	ENSG00000101972	STAG2	2.1e-05	1.03921	0.000227	0	0.000409	0	0	0	0
ENST00000217800	ENSG00000101751	POLI	0	1.01629	0	0	0	0	0	0	0
ENST00000484177	ENSG00000169599	NFU1	0.019919	1.0055	0.205666	0.011619	0.012031	0.003671	0.006234	0.003671	0.005855
ENST00000437606	ENSG00000088280	ASAP3	0.055527	0.938808	0	0	0	0.001802	0.002	0.001802	0
ENST00000588202	ENSG00000257949	TEN1	0	0.937067	0	0	0.19835	0	0	0	0
ENST00000615791	ENSG00000144161	ZC3H8	0	0.907569	0	0.001922	0.010181	0.02787	0.024438	0.02787	0.021905
ENST00000418089	ENSG00000116701	NCF2	0	0.895825	0	0	0	0	0	0	0
ENST00000648994	ENSG00000261609	GAN	0.004175	0.885297	0.005979	0.004691	0.008287	0.00548	0.006797	0.00548	0.003128
ENST00000361293	ENSG00000131778	CHD1L	0	0.866986	0	0	0	0	0	0	0
ENST00000380938	ENSG00000112851	ERBIN	0	0.861994	0	0	0	0	0	0	0
ENST00000404744	ENSG00000205643	CDPF1	0.003525	0.850268	0	0	0	0.006239	0.00538	0.006239	0
ENST00000396629	ENSG00000092108	SCFD1	0	0.849068	0	0	0	0	0	0	0
ENST00000645492	ENSG00000107485	GATA3	1.2e-05	0.842608	5e-06	1.5e-05	4e-06	1.7e-05	4e-05	1.7e-05	1.2e-05
ENST00000304527	ENSG00000109686	SH3D19	0.01178	0.737111	0	0.149085	0	0.017581	0	0.017581	0
ENST00000370976	ENSG00000116729	WLS	0	0.694493	0	0	0	0	0	0	0
ENST00000563579	ENSG00000134419	RPS15A	0.014721	0.690382	0	0	0.031532	0.012904	0.087147	0.012904	0
ENST00000539345	ENSG00000141556	TBCD	0.000208	0.682836	0.000111	0	0.000114	1.3e-05	0.000187	1.3e-05	0.000116
ENST00000646533	ENSG00000186073	C15orf41	0	0.609645	0	0	0	0	0	0	0
ENST00000441946	ENSG00000131467	PSME3	0.037193	0.606986	0.008068	0.003032	0	0.039244	0	0.039244	0.047489
ENST00000398061	ENSG00000160216	AGPAT3	0.004208	0.5948	0	0	0	0.000622	0.163194	0.000622	0.000677
ENST00000380310	ENSG00000099364	FBXL19	0.007689	0.594295	0.005202	0.008322	0.020041	0.021115	0.009933	0.021115	0.009217
ENST00000641178	ENSG00000164073	MFSD8	0.049239	0.545026	0.021557	0	0	0.029284	0.010525	0.029284	0.000637
ENST00000555424	ENSG00000089775	ZBTB25	0.040955	0.544695	0	0	0	0.095742	0.013388	0.095742	0
ENST00000449224	ENSG00000170275	CRTAP	0	0.534668	0	0	0	0	0	0	0
ENST00000437288	ENSG00000213722	DDAH2	0.04096	0.498759	0	0	0	0	0	0	0
ENST00000407973	ENSG00000138867	GUCD1	0	0.485112	0	0	0	0	0	0	0
ENST00000585923	ENSG00000197563	PIGN	0	0.471485	0.002716	0	0	0	0	0	0
ENST00000409078	ENSG00000074054	CLASP1	0	0.455454	0	0	0	0	0.073525	0	0
ENST00000623927	ENSG00000223802	CERS1	0.00107	0.437789	0.001385	0.014161	0.000342	8.1e-05	0.002547	8.1e-05	0
ENST00000612959	ENSG00000126653	NSRP1	0	0.419208	0.050972	0	0.0294	0	0.018682	0	0
ENST00000552033	ENSG00000169372	CRADD	0	0.409972	0	0	0	0	0	0	0
ENST00000570778	ENSG00000176845	METRNL	0.004649	0.405787	0.009655	0.017088	0.020469	0.020663	0.017903	0.020663	0.009979
ENST00000012134	ENSG00000010818	HIVEP2	0.010014	0.400129	0.001528	0.006141	0.003646	0.004872	0.063213	0.004872	0.006588
ENST00000567072	ENSG00000088682	COQ9	0	0.399743	0	0	0	0	0	0	0
ENST00000469299	ENSG00000165644	COMTD1	0	0.397378	0	0	0	0	0	0	0
ENST00000489081	ENSG00000184220	CMSS1	0	0.397092	0	0	0	0	0	0	0.000546
ENST00000612624	ENSG00000273590	SMIM11B	0	0.385485	0.000121	0	0	0	0	0	0
ENST00000351137	ENSG00000217555	CKLF	0.002949	0.379929	0.017575	0.010483	0.010124	0.013092	0.025368	0.013092	0.007647
ENST00000457800	ENSG00000198231	DDX42	0.027558	0.377786	0.001165	0.006923	0.002019	0.011131	0.00885	0.011131	0.005692
ENST00000512529	ENSG00000286169	AHRR	0.031964	0.376401	0.031947	0.024813	0.036239	0	0	0	0
ENST00000402641	ENSG00000059145	UNKL	0.015415	0.370099	0.004056	1e-05	0.067457	0.015984	0.016721	0.015984	0.005081
ENST00000525321	ENSG00000119707	RBM25	0.00091	0.359972	0.004924	0.002616	0	0.001714	0.002528	0.001714	0.004089
ENST00000595033	ENSG00000130475	FCHO1	0	0.359961	0	0	0	0	0	0	0.04615
ENST00000557374	ENSG00000087301	TXNDC16	0	0.358272	0	0	0	0	0	0	0
ENST00000394935	ENSG00000198242	RPL23A	0	0.354406	0	0	0	0	0	0	0
ENST00000584347	ENSG00000169689	CENPX	0.006229	0.343421	0.006024	0.008557	0.0153	0.003667	0.029403	0.003667	0.007008
ENST00000582161	ENSG00000109016	DHRS7B	0	0.339217	0	0	0	0	0	0	0
ENST00000396682	ENSG00000106399	RPA3	0	0.328262	0	0	0	0	0	0	0
ENST00000336509	ENSG00000092931	MFSD11	0	0.326225	0	0	0	0	0	0	0
ENST00000623978	ENSG00000239900	ADSL	0.029515	0.324486	0	0	0	0.079714	0	0.079714	0
ENST00000586016	ENSG00000013306	SLC25A39	0	0.304372	0	0	0	0	0	0	0
ENST00000571382	ENSG00000184939	ZFP90	0	0.28571	0	0.041606	0	0	0	0	0.013356
ENST00000454076	ENSG00000067829	IDH3G	0	0.284655	0	0.096955	0	0	0	0	0
ENST00000518329	ENSG00000183137	CEP57L1	3e-05	0.281166	0	0.052038	0.033406	0.008878	0.000216	0.008878	0.000882
ENST00000376634	ENSG00000197969	VPS13A	0.002163	0.28051	0.010922	0.005443	0.009815	0.006756	0.002259	0.006756	0.003324
ENST00000228606	ENSG00000111012	CYP27B1	0	0.279944	0	0	0	0	0	0	0
ENST00000434359	ENSG00000123297	TSFM	0	0.278607	0	0	0	0	0	0	0.007547
ENST00000639100	ENSG00000175193	PARL	0	0.274612	0	0	0	0	0	0	0
ENST00000520627	ENSG00000008988	RPS20	0	0.27202	0	0	0	0	0	0	0
ENST00000369968	ENSG00000121940	CLCC1	0	0.269992	0	0	0	0	0	0	0
ENST00000515869	ENSG00000225830	ERCC6	0.00109	0.26895	0.007382	0.00442	0.008189	0.003697	0.011117	0.003697	0.00463
ENST00000287859	ENSG00000157181	ODR4	0	0.262911	0	0	0	0	0	0	0
ENST00000621176	ENSG00000121236	TRIM6	0	0.256775	0	0	0	0	0	0	0
ENST00000461133	ENSG00000163539	CLASP2	0	0.250837	0	0	0	0	0	0	0.000157
ENST00000359831	ENSG00000056972	TRAF3IP2	0	0.249919	0	0	0	0	0	0	0.09162
ENST00000466559	ENSG00000214022	REPIN1	0.016223	0.244819	0.002804	0.005798	0.005878	0.030025	0.012232	0.030025	0.00843
ENST00000443677	ENSG00000181481	RNF135	0.004445	0.243393	0.001434	0.012415	0.020067	0.006037	0.003119	0.006037	0.001217
ENST00000606253	ENSG00000167604	AD000864.1	0	0.238155	0	0	0	0	0	0	0
ENST00000652027	ENSG00000123297	TSFM	0.000515	0.234975	0.007024	0.002194	0.023983	0.000465	0.0007	0.000465	0.000391
ENST00000535191	ENSG00000114904	NEK4	0	0.232149	0	0	0	0	0	0	0
ENST00000535906	ENSG00000184056	VPS33B	0	0.229291	0	0	0	0	0	0	0
ENST00000550603	ENSG00000177425	PAWR	0.002021	0.228958	0.001078	0.00085	0.001449	0.002225	0.001181	0.002225	0.001578
ENST00000444589	ENSG00000088727	KIF9	0	0.225688	0	0	0	0	0	0	0
ENST00000435847	ENSG00000055163	CYFIP2	0	0.223442	0	0	0	0	0	0	0
ENST00000316356	ENSG00000137501	SYTL2	0.003377	0.222228	0.00184	0.000828	0.000531	0.001874	0.000431	0.001874	0.003297
ENST00000536723	ENSG00000135093	USP30	0.007538	0.221995	0.015354	0	0	0.006016	0.014136	0.006016	0.015344
ENST00000644011	ENSG00000088836	SLC4A11	0.045452	0.22159	0	0	0	0.023608	0	0.023608	0
ENST00000572525	ENSG00000176108	CHMP6	0	0.218699	0.000808	0	0.029442	0.023789	0	0.023789	0.005478
ENST00000549011	ENSG00000139324	TMTC3	0	0.215669	0	0	0	0	0	0	0
ENST00000448551	ENSG00000106692	FKTN	0	0.214811	0	0	0	0	0.004599	0	0
ENST00000354498	ENSG00000137764	MAP2K5	0.006867	0.212709	0.005262	0.006422	0.01216	0.013762	0.003013	0.013762	0.004413
ENST00000181796	ENSG00000065809	FAM107B	0	0.209751	0	0	0	0	0	0	0
ENST00000611176	ENSG00000269335	IKBKG	0	0.205597	0	0	0	0	0	0	0
ENST00000471336	ENSG00000078487	ZCWPW1	0.013043	0.204398	0	0	0.026366	0	0	0	0.009724
ENST00000574679	ENSG00000060237	WNK1	0.005038	0.20117	0.000521	0.001775	0.01637	0.004746	0.012392	0.004746	0.003579
ENST00000652444	ENSG00000273136	NBPF26	0.001371	0.188792	0.000226	0.006461	0.000126	0.00016	0.009035	0.00016	0.020841
ENST00000431636	ENSG00000196345	ZKSCAN7	0	0.186753	0	0	0	0	0	0	0
ENST00000614286	ENSG00000233757	AC092835.1	0	0.186343	0	0	0	0	0	0	0
ENST00000504725	ENSG00000034533	ASTE1	0	0.178321	0	0	0	0	0	0	0
ENST00000545045	ENSG00000111674	ENO2	0	0.174947	0	0	0	0.000191	0	0.000191	0.000705
ENST00000511900	ENSG00000204628	RACK1	0	0.174294	0	0	0	0	0	0	0
ENST00000369128	ENSG00000136631	VPS45	0	0.174169	0	0	0	0	0	0	0
ENST00000568454	ENSG00000103197	TSC2	0	0.170618	0	0.001581	0.007987	0.001198	0.001154	0.001198	0.008616
ENST00000531266	ENSG00000168522	FNTA	0	0.165998	0	0	0	0	0	0	0
ENST00000507602	ENSG00000015532	XYLT2	0.046835	0.164701	0.003604	0.000238	0	0	0.001394	0	0.001425
ENST00000436269	ENSG00000115464	USP34	0	0.164493	0	0	0	0	0	0	0
ENST00000591245	ENSG00000123159	GIPC1	0	0.160436	0	0	0	0	0	0	0
ENST00000461689	ENSG00000114904	NEK4	0	0.159814	0	0	0	0	0	0	0
ENST00000452104	ENSG00000115825	PRKD3	0	0.15912	0	0	0	0	0	0	0
TCONS_00342299	XLOC_136999	XLOC_136999	0	0.158696	0.026841	0	0	0	0	0	0
ENST00000472125	ENSG00000175792	RUVBL1	0	0.158494	0	0	0	0	0	0	0
ENST00000599211	ENSG00000079435	LIPE	0	0.157468	0	0	0	0.026821	0	0.026821	0
ENST00000459820	ENSG00000121578	B4GALT4	0	0.155423	0	0	0	0	0	0	0
ENST00000652125	ENSG00000173599	PC	0	0.153556	0	0.001339	0	0	0	0	0.000548
ENST00000445472	ENSG00000144320	LNPK	0	0.152387	0	0	0.056401	0	0	0	0
ENST00000293970	ENSG00000162065	TBC1D24	1e-06	0.150154	0	0	0	0	0	0	0
ENST00000262585	ENSG00000105339	DENND3	0.003511	0.147187	0	0	0	0	0	0	0.001428
ENST00000452674	ENSG00000243477	NAA80	0.054142	0.143837	0	0	0	0	0	0	0
ENST00000643402	ENSG00000177189	RPS6KA3	0	0.142151	0	0	0	0.055902	0	0.055902	0
ENST00000542230	ENSG00000142188	TMEM50B	0.003937	0.140861	0.004269	0.00465	0.014695	0.002564	0.004567	0.002564	0.002208
ENST00000532484	ENSG00000177542	SLC25A22	0	0.136489	0	0	0	0	0	0	0
ENST00000341211	ENSG00000063761	ADCK1	0	0.135644	0	0	0	0	0	0	0
ENST00000374819	ENSG00000155827	RNF20	0.01425	0.133736	0.001232	2.7e-05	0.003529	0.002895	0.00206	0.002895	0.001406
ENST00000637417	ENSG00000131089	ARHGEF9	0.001933	0.13301	0.007611	0.000844	0.001839	0	0.002172	0	0.004456
ENST00000556461	ENSG00000100568	VTI1B	0.017561	0.130526	0	0	0	0	0.008789	0	0.021957
ENST00000644810	ENSG00000166340	TPP1	0	0.129871	0	0	0	0	0	0	0
ENST00000549987	ENSG00000125954	CHURC1-FNTB	0	0.128685	0	0	0	0	0	0	0
ENST00000371189	ENSG00000162599	NFIA	0	0.127627	0	0	0	0	0	0	0.002406
TCONS_00342292	XLOC_136999	XLOC_136999	0	0.123775	0	0	0	0.00016	0	0.00016	0
ENST00000237172	ENSG00000118407	FILIP1	0	0.123595	0	0	0	0	0	0	0
ENST00000532669	ENSG00000149554	CHEK1	0	0.122802	0	0	0	0	0	0	0
ENST00000428034	ENSG00000163815	CLEC3B	0	0.120997	0.00086	0	0	0	0	0	0
ENST00000445241	ENSG00000119383	PTPA	0.00029	0.120881	3.5e-05	8.8e-05	0.015251	0.016138	0.00889	0.016138	0.006017
ENST00000536194	ENSG00000067182	TNFRSF1A	0	0.120625	0	0	0	0	0	0	0
ENST00000360047	ENSG00000113448	PDE4D	0.007894	0.11827	0.004415	0	0	0	0.00605	0	0
ENST00000620260	ENSG00000108352	RAPGEFL1	0.003863	0.117837	0	0	0	0.01175	0	0.01175	0
ENST00000647261	ENSG00000156313	RPGR	0	0.115253	0	0	0.000743	0	0	0	0.004393
ENST00000309481	ENSG00000073605	GSDMB	0.002783	0.112771	0.004317	0	0	0	0	0	0
ENST00000440407	ENSG00000107872	FBXL15	0	0.112198	0	0	0	0	0	0	0
ENST00000642992	ENSG00000168036	CTNNB1	0	0.110555	0.003817	0.024093	0	0	0	0	0
ENST00000536272	ENSG00000165185	KIAA1958	0	0.109915	0	0	0.02493	0	0	0	0
ENST00000424754	ENSG00000162736	NCSTN	0	0.109677	0	0	0	0	0	0	0
ENST00000556599	ENSG00000129473	BCL2L2	0	0.109296	0	0	0	0	0	0	0
ENST00000615216	ENSG00000177200	CHD9	0	0.107553	0	0	0	0	0	0	0
ENST00000421643	ENSG00000101353	MROH8	0	0.107012	0.011889	0	0	0	0	0	0
ENST00000410043	ENSG00000102547	CAB39L	0	0.102671	0	0	0	0.035371	0	0.035371	0
ENST00000565924	ENSG00000156873	PHKG2	0	0.102341	0	0	0	0	0	0	0
ENST00000434854	ENSG00000089682	RBM41	0	0.10228	0	0	0	0	0	0	0
ENST00000557591	ENSG00000092036	HAUS4	0	0.101002	0	0	0	0	0	0	0
ENST00000562707	ENSG00000140931	CMTM3	0	0.100226	0	0	0	0	0	0	0
ENST00000642836	ENSG00000168036	CTNNB1	0	0.100085	0	0.03183	0	0	0	0	0
ENST00000530857	ENSG00000167861	HID1	0	0.099979	0	0	0	0	0	0	0
ENST00000602063	ENSG00000197619	ZNF615	0	0.09996	0	0	0	0	0.000636	0	0.000688
ENST00000356463	ENSG00000196998	WDR45	0	0.099464	0	0	0	0	0.03558	0	0
ENST00000502113	ENSG00000246922	UBAP1L	0.007908	0.097163	0.000891	0	0	0.000693	0	0.000693	0.001003
ENST00000611261	ENSG00000170909	OSCAR	0.004141	0.096303	0.022011	0.003063	0.003395	0.00283	0.001292	0.00283	0.001278
ENST00000651972	ENSG00000169255	B3GALNT1	0	0.095877	0	0	0	0.001969	0	0.001969	0
ENST00000321392	ENSG00000179580	RNF151	0	0.094814	0	0	0	0	0	0	0
ENST00000521960	ENSG00000104205	SGK3	0	0.094458	0	0	0	0.000202	0.026558	0.000202	0.001612
ENST00000602782	ENSG00000138744	NAAA	0	0.092799	0	0	0	0	0	0	0
ENST00000332912	ENSG00000185523	SPATA45	0	0.091466	0	0	0	0	0	0	0
ENST00000437963	ENSG00000187634	SAMD11	0	0.091287	0	0	0.003178	0	0	0	0
ENST00000555462	ENSG00000100796	PPP4R3A	0	0.090698	0	0	0	0	0	0	0
ENST00000369253	ENSG00000099204	ABLIM1	0.000843	0.08839	0	0	0	0	0.00271	0	0.004326
ENST00000650467	ENSG00000183287	CCBE1	0	0.086669	0	0	0	0	0	0	0
ENST00000569444	ENSG00000140694	PARN	0	0.086269	0	0	0	0	0	0	0
ENST00000640601	ENSG00000243335	KCTD7	0	0.08569	0	0	0	0	0	0	0
ENST00000522905	ENSG00000147316	MCPH1	0	0.085459	0	0	0	0	0	0	0
ENST00000649611	ENSG00000158169	FANCC	0	0.082527	0	0	0.005398	0	0	0	0
ENST00000223336	ENSG00000106603	COA1	0.009462	0.082146	0.00363	0.010871	0.000128	0.000227	0.005618	0.000227	1.9e-05
ENST00000546166	ENSG00000110203	FOLR3	0.000744	0.082116	0.00048	0.000399	0.000583	0.00031	0.000477	0.00031	0.032569
ENST00000413325	ENSG00000158528	PPP1R9A	0	0.08051	0	0	0	0	0	0	0
ENST00000297615	ENSG00000155158	TTC39B	0	0.079957	0	0	0	0	0	0	0
ENST00000610710	ENSG00000243710	CFAP57	0	0.077893	0.009723	0	0	0	0	0	0
ENST00000377332	ENSG00000115525	ST3GAL5	0.023923	0.077865	0	0	0	0	0	0	0
ENST00000433172	ENSG00000134198	TSPAN2	0	0.076596	0	0	0	0	0	0	0
ENST00000530164	ENSG00000149273	RPS3	0.000365	0.076564	0.000503	0.000847	2.1e-05	1.1e-05	5e-06	1.1e-05	3e-06
ENST00000532764	ENSG00000165490	DDIAS	0	0.076173	0	0	0	0	0	0	0
ENST00000396207	ENSG00000008394	MGST1	0	0.074885	0.005474	0	0.001725	0.000245	0	0.000245	0.007572
ENST00000409653	ENSG00000188732	FAM221A	0	0.07425	0	0	0	0.009828	0	0.009828	0.00557
ENST00000493135	ENSG00000188833	ENTPD8	0	0.073694	0	0	0	0	0	0	0
ENST00000354566	ENSG00000137501	SYTL2	0.000578	0.073476	0.000622	0.007008	0.000142	0.000296	8.1e-05	0.000296	0.000306
ENST00000583024	ENSG00000133193	FAM104A	0	0.072955	0	0	0	0	0	0	0
ENST00000432909	ENSG00000103197	TSC2	0	0.072913	0	0	0	0	0	0	0
ENST00000442759	ENSG00000139737	SLAIN1	0.009311	0.072746	0.000671	0.001094	0.000692	0.000809	0.003975	0.000809	0.000888
ENST00000354868	ENSG00000152942	RAD17	0	0.072696	0.003851	0	0	0	0	0	0
ENST00000601545	ENSG00000077312	SNRPA	0	0.072577	0	0	0	0	0	0	0
ENST00000508606	ENSG00000198589	LRBA	0	0.070859	0	0	0	0	0	0	0
ENST00000634509	ENSG00000101000	PROCR	0	0.069917	0	0	0	0	0	0	0
ENST00000561224	ENSG00000166821	PEX11A	0	0.069619	0	0	0	0	0	0	0
ENST00000526687	ENSG00000143195	ILDR2	0.00862	0.069274	0	0	0	0	0	0	0
ENST00000652084	ENSG00000134897	BIVM	0	0.068579	0	0	0	0	0	0	0
ENST00000612340	ENSG00000143493	INTS7	0	0.068119	0	0	0	0	0	0	0
ENST00000558788	ENSG00000100938	GMPR2	0	0.067719	0	0	0	0	0	0	0
ENST00000396251	ENSG00000168334	XIRP1	0	0.067514	0	0.029515	0	0	0	0	0
ENST00000415769	ENSG00000115685	PPP1R7	0	0.066739	0	0	0	0	0	0	0
ENST00000574425	ENSG00000153406	NMRAL1	0	0.06595	0	0	0	0	0	0	0
ENST00000565548	ENSG00000137822	TUBGCP4	0	0.065281	0	0	0	0.020988	0	0.020988	0
ENST00000393282	ENSG00000086991	NOX4	0	0.065151	0	0	0.016308	0	0	0	0
ENST00000585045	ENSG00000168646	AXIN2	0	0.064595	0	0	0.022801	0.001509	0	0.001509	0
ENST00000485491	ENSG00000151651	ADAM8	0.009052	0.06272	0	0	0.016665	0	0	0	0
ENST00000408937	ENSG00000128573	FOXP2	0	0.062328	0	0	0	0.001225	0	0.001225	0
ENST00000538663	ENSG00000105676	ARMC6	0	0.061905	0	0	0.014968	0	0.006033	0	0
ENST00000598411	ENSG00000109610	SOD3	0	0.061607	0	0	0	0	0	0	0
ENST00000428002	ENSG00000184277	TM2D3	0	0.060471	0	0	0	0	0	0	0
ENST00000421001	ENSG00000106484	MEST	0	0.060441	0	0	0	0	0	0	0
ENST00000404867	ENSG00000184347	SLIT3	0	0.06028	0	0.006413	0	0.000373	0.000713	0.000373	0
ENST00000278385	ENSG00000026508	CD44	0	0.060237	0	0	0	0	0	0	0.019022
ENST00000382183	ENSG00000080503	SMARCA2	0	0.059967	0	0	0	0	0	0	0
ENST00000559066	ENSG00000092445	TYRO3	0	0.059963	0	0	0	0	0	0	0
ENST00000585614	ENSG00000186566	GPATCH8	0	0.059486	0	0	0	0	0	0	0
ENST00000564445	ENSG00000063854	HAGH	0	0.058988	0	0	0	0	0	0	0
ENST00000455064	ENSG00000144908	ALDH1L1	0	0.058911	0	0	0	0	0.014047	0	0.010364
ENST00000584837	ENSG00000196704	AMZ2	0	0.056518	0	0	0.000644	0	0.000629	0	0.000557
ENST00000348328	ENSG00000123612	ACVR1C	0	0.056119	0	0	0	0	0	0	0
ENST00000436218	ENSG00000184381	PLA2G6	0.018337	0.055963	0	0	0	0	0	0	0
ENST00000468727	ENSG00000163947	ARHGEF3	0	0.055351	0	0	0	0	0	0	0
ENST00000390652	ENSG00000141376	BCAS3	0	0.054646	0	4.5e-05	0	0	0.000612	0	0
ENST00000510741	ENSG00000196104	SPOCK3	0	0.054342	0	0	0	0	0	0	0
ENST00000289004	ENSG00000158104	HPD	0	0.054166	0	0	0.002697	0	0	0	0.00072
ENST00000597985	ENSG00000105373	NOP53	0	0.0539	0	0.014282	0	0	0	0	0
ENST00000591652	ENSG00000188321	ZNF559	0	0.053895	0	0	0	0	0	0	0
ENST00000538227	ENSG00000021300	PLEKHB1	1.5e-05	0.053882	0	0	0	0	0	0	0
ENST00000356757	ENSG00000172738	TMEM217	0	0.053732	0	0	0	0.000403	0	0.000403	0
ENST00000348264	ENSG00000121940	CLCC1	0	0.053626	0	0	0	0	0	0	0
ENST00000467634	ENSG00000114126	TFDP2	0.0069	0.052677	0	0	0	0	0	0	0
ENST00000629272	ENSG00000119787	ATL2	0.0029	0.052649	0	0	0.001139	7.2e-05	0.006351	7.2e-05	0
ENST00000495241	ENSG00000080845	DLGAP4	0	0.05249	0	0	0	0	0	0	0
ENST00000340313	ENSG00000173338	KCNK7	0	0.052015	0	0	0	0	0	0	0
ENST00000515022	ENSG00000121236	TRIM6	0	0.051688	0	0	0	0	0	0	0
ENST00000579557	ENSG00000125450	NUP85	0	0.051491	0	0	0	0	0	0	0
ENST00000439369	ENSG00000151466	SCLT1	0	0.05132	0	0	0	0	0	0	0
ENST00000490721	ENSG00000078487	ZCWPW1	0	0.051103	0	0	0	0	0	0	0.001399
ENST00000555270	ENSG00000165804	ZNF219	0	0.050644	0	0	0	0	0	0	0
ENST00000541518	ENSG00000165621	OXGR1	0.000458	0.050588	0	0	0	0	0	0	0
ENST00000366589	ENSG00000086619	ERO1B	0	0.050392	0	0	0	0	0.002943	0	0
ENST00000495955	ENSG00000165219	GAPVD1	0	0.050011	0	0	0	0.010963	0	0.010963	0
ENST00000565715	ENSG00000103051	COG4	0	0.049822	0	0	0	0	0	0	0
ENST00000511974	ENSG00000108848	LUC7L3	0.000422	0.04961	0	0.011973	0.000833	0	0	0	0
ENST00000580654	ENSG00000073584	SMARCE1	0	0.049553	0	0	0	0	0	0	0
ENST00000571269	ENSG00000149926	FAM57B	0	0.049076	0	0	0	0	0	0	0
ENST00000577612	ENSG00000101751	POLI	0	0.049032	0	0	0	0	0	0	0
ENST00000492826	ENSG00000005436	GCFC2	0	0.048575	0	0	0	0	0	0	0
ENST00000301452	ENSG00000167769	ACER1	0	0.048431	0.004882	0	0	0.009081	0	0.009081	0
ENST00000599029	ENSG00000063176	SPHK2	0	0.048356	0	0	0	0	0	0	0
ENST00000472507	ENSG00000124508	BTN2A2	0	0.048138	0	0	0	0	0.016681	0	0
ENST00000337604	ENSG00000185499	MUC1	0	0.047696	0	0	0	0	0	0	0
ENST00000622702	ENSG00000120913	PDLIM2	0	0.047381	0	0	0	0	0	0	0
ENST00000507984	ENSG00000081189	MEF2C	0	0.04709	0	0	0.008583	0	0	0	0.007926
ENST00000409082	ENSG00000102547	CAB39L	0	0.047014	0	0	0	0.009357	0	0.009357	0
ENST00000562578	ENSG00000140995	DEF8	0	0.046931	0	0	0	0	0	0	0
ENST00000295966	ENSG00000163689	C3orf67	0.001604	0.046555	0	0	0	0	0	0	0
ENST00000443572	ENSG00000108443	RPS6KB1	0	0.046423	0	0	0	0	0	0	0
ENST00000588002	ENSG00000167645	YIF1B	0	0.043074	0	0	0	0	0	0	0
ENST00000427334	ENSG00000026950	BTN3A1	0	0.042935	0	0	0	0	0	0	0
ENST00000415928	ENSG00000197375	SLC22A5	0	0.042639	0	0	0	0.001465	0	0.001465	0.013131
ENST00000610288	ENSG00000188517	COL25A1	0	0.04232	0	0	0	0	0	0	5.9e-05
ENST00000484127	ENSG00000169255	B3GALNT1	0	0.042104	0	0	0.015042	0	0	0	0
ENST00000432753	ENSG00000127948	POR	0.006002	0.04198	0	0.002226	0	0.003408	0	0.003408	0.00137
ENST00000630268	ENSG00000196628	TCF4	0	0.041483	0	0	0	0	0	0	0
ENST00000591474	ENSG00000154832	CXXC1	0	0.041048	0	0	0	0	0	0	0
ENST00000544249	ENSG00000147789	ZNF7	0	0.040944	0	0	0	0	0	0	0
ENST00000542080	ENSG00000047621	C12orf4	0	0.040417	0	0	0	0	0	0	0
ENST00000575235	ENSG00000161958	FGF11	0	0.039234	0	0.00355	0	0	0.002439	0	0.009502
ENST00000579155	ENSG00000169738	DCXR	0	0.039095	0	0	0	0	0	0	0
ENST00000528473	ENSG00000175274	TP53I11	0	0.038634	0	0	0	0	0	0	0
ENST00000639423	ENSG00000112425	EPM2A	0	0.03815	0	0	0	0	0	0	0
ENST00000577721	ENSG00000073584	SMARCE1	0	0.037888	0	0	0	0	0	0	0
ENST00000421199	ENSG00000118263	KLF7	0	0.03757	0	0	0	0	0.004146	0	0
ENST00000527809	ENSG00000117152	RGS4	0	0.0375	0	0	0	0	0	0	0
ENST00000554468	ENSG00000140092	FBLN5	0	0.037101	0.007589	0	0	0	0.000944	0	0
ENST00000581484	ENSG00000169696	ASPSCR1	0	0.036994	0	0.008683	0	0	0	0	0
ENST00000426136	ENSG00000117501	MROH9	0.003737	0.036552	0	0	0	0	0	0	0
ENST00000397143	ENSG00000126870	WDR60	0.00827	0.036297	0.003421	0	0	0	0	0	0
ENST00000339142	ENSG00000173918	C1QTNF1	0	0.035819	0	0	0	0	0	0	0.007136
ENST00000444450	ENSG00000067829	IDH3G	0	0.035796	0	0	0	0	0	0	0
ENST00000505581	ENSG00000121067	SPOP	0.000667	0.035488	2.9e-05	0	0.000612	0.00074	0.000104	0.00074	0.000111
ENST00000567512	ENSG00000196502	SULT1A1	0	0.034992	0	0	0	0	0	0	0
ENST00000572044	ENSG00000262246	CORO7	0	0.034781	0	0	0	0	0	0	0
ENST00000407096	ENSG00000187554	TLR5	0	0.034764	0	0	0	0	0	0	0
ENST00000341840	ENSG00000196345	ZKSCAN7	0	0.033817	0	0	0	0	0	0	0
ENST00000505262	ENSG00000109255	NMU	0	0.033739	0	0	0	0	0	0	0
ENST00000518414	ENSG00000172748	ZNF596	0	0.033052	6.4e-05	0.002075	0	0.004715	0.000943	0.004715	2.1e-05
ENST00000580560	ENSG00000178927	CYBC1	0	0.032821	0	0	0	0	0	0	0
ENST00000341633	ENSG00000103351	CLUAP1	0	0.032519	0	0	0	0	0	0	0
ENST00000513222	ENSG00000204536	CCHCR1	0	0.03214	0	0	0	0	0	0	0
ENST00000426700	ENSG00000137434	C6orf52	0	0.032117	0	0	0	0	0	0	0
ENST00000471218	ENSG00000132334	PTPRE	0	0.032108	0	0	0	0	0	0	0
ENST00000446957	ENSG00000244754	N4BP2L2	0	0.0319	0	0	0	0	0	0	0
ENST00000511408	ENSG00000173376	NDNF	0	0.031555	0	0.006061	0	0	0	0	0
ENST00000368850	ENSG00000112394	SLC16A10	0	0.031054	0	0	0	0	0	0	0
ENST00000326431	ENSG00000181585	TMIE	0	0.030694	0	0	0	0	0	0	0
ENST00000586089	ENSG00000108799	EZH1	0	0.030547	0	0	0	0	0	0	0
ENST00000493485	ENSG00000198556	ZNF789	0	0.030111	0.003636	0	0	0.001253	0	0.001253	0
ENST00000253054	ENSG00000130755	GMFG	0	0.030109	0	0	0.007388	0	0	0	0
ENST00000449956	ENSG00000162267	ITIH3	0	0.030032	0	0	0	0	0	0	0
ENST00000250831	ENSG00000226941	RBMY1J	0	0.029199	0	0	0	0	0	0	0
ENST00000587531	ENSG00000183401	CCDC159	0	0.029099	0	0	0	0	0.010744	0	0
ENST00000345635	ENSG00000139410	SDSL	0.00109	0.028825	0	0	0.000396	0	0	0	0
ENST00000368948	ENSG00000155085	AK9	0	0.028358	0	0	0	0	0	0	0
ENST00000319584	ENSG00000049618	ARID1B	0.000383	0.028158	0	0	0	0.005166	0.000126	0.005166	0.000135
ENST00000525906	ENSG00000085831	TTC39A	0	0.028069	0	0	0	0	0	0	0
ENST00000431787	ENSG00000138380	CARF	0	0.027934	0	0	0	0	0	0	0
ENST00000550596	ENSG00000178498	DTX3	0	0.027293	0	0	0	0	0	0	0
ENST00000454326	ENSG00000163596	ICA1L	0	0.026929	0	0	0.003656	0	0	0	0
ENST00000428738	ENSG00000122068	FYTTD1	0	0.026493	0	0	0	0	0	0	0
ENST00000455401	ENSG00000144834	TAGLN3	0	0.026445	0	0	0	0	0	0	0
ENST00000563186	ENSG00000089486	CDIP1	0	0.025993	0	0	0	0	0	0	0
ENST00000373984	ENSG00000147130	ZMYM3	0	0.025666	0.00122	0	0	0	0	0	0
ENST00000624426	ENSG00000205090	TMEM240	0	0.025562	0	0	0	0	0	0	0.001565
ENST00000587909	ENSG00000062370	ZNF112	0	0.025153	0	0	0	0	0	0	0
ENST00000434103	ENSG00000149968	MMP3	0	0.025035	0	0	0	0	0	0	0
ENST00000336642	ENSG00000106633	GCK	0	0.025025	0	0	0	0	0	0	0
ENST00000614476	ENSG00000122085	MTERF4	0	0.024067	0	0	0	0	0.005101	0	0
ENST00000556775	ENSG00000188488	SERPINA5	0	0.023684	0	0	0	0	0	0	0.002995
ENST00000531053	ENSG00000137496	IL18BP	0	0.023001	0	0	0	0	0	0	0
ENST00000571459	ENSG00000189067	LITAF	0	0.022841	0	0	0	0	0	0	0
ENST00000320267	ENSG00000118307	CASC1	0	0.022419	0	0	0	0	0	0	0.002234
ENST00000497864	ENSG00000248487	ABHD14A	0	0.022354	0	0	0	0	0	0	0
ENST00000562206	ENSG00000159713	TPPP3	0	0.022249	0	0	0	0	0	0	0
ENST00000474690	ENSG00000181322	NME9	0	0.021929	0	0	0	0	0	0	0
ENST00000549468	ENSG00000177426	TGIF1	0	0.021836	0	0	0	0	0	0	0
ENST00000640980	ENSG00000112425	EPM2A	0	0.021645	0	0	0	0	0	0	0
ENST00000592743	ENSG00000108799	EZH1	9e-06	0.021477	4e-06	0	0	4.3e-05	1.1e-05	4.3e-05	4e-06
ENST00000561195	ENSG00000101544	ADNP2	0	0.02145	0	0	0	0	0	0	0
ENST00000448599	ENSG00000233041	PHGR1	0	0.021401	0	0	0	0	0	0	0
ENST00000343267	ENSG00000189058	APOD	0	0.021361	0	0	0	0	0	0	0
ENST00000613597	ENSG00000278558	TMEM191B	0	0.02132	0	0	0	0	0	0	0
ENST00000573608	ENSG00000140993	TIGD7	0	0.020821	0	0	0.006473	0	0	0	0
ENST00000461183	ENSG00000168237	GLYCTK	0	0.020566	0	0	0	0	0	0	0
ENST00000426158	ENSG00000157214	STEAP2	0	0.020566	0	0	0	0	0	0	0
ENST00000377819	ENSG00000133318	RTN3	1.5e-05	0.020312	0	0	0	0	0	0	0
ENST00000449330	ENSG00000168758	SEMA4C	0	0.020027	0	0	0	0	0	0	0
ENST00000292596	ENSG00000213316	LTC4S	0	0.01988	0	0	0	0	0.006625	0	0
ENST00000632573	ENSG00000147251	DOCK11	0.003209	0.019682	0	0	0	0	0	0	0
ENST00000562256	ENSG00000141002	TCF25	0	0.019117	0	0	0	0	0	0	0
ENST00000595676	ENSG00000268465	AC008403.2	0	0.019044	0	0	0	0	0	0	0
ENST00000526968	ENSG00000149269	PAK1	0.00226	0.018526	0	0.003898	0	0	0	0	0
ENST00000420772	ENSG00000047849	MAP4	0	0.018523	0	0.000973	0	0	0	0	0
ENST00000546745	ENSG00000011465	DCN	0	0.018189	0	0	0	0.007229	0	0.007229	0
ENST00000334134	ENSG00000186895	FGF3	0	0.018177	0	0	0	0	0	0	0
ENST00000515118	ENSG00000169026	SLC49A3	0	0.01808	0	0	0	0	0	0	0
ENST00000404295	ENSG00000153406	NMRAL1	0	0.018062	0	0	0	0	0	0	0
ENST00000588666	ENSG00000130158	DOCK6	1e-06	0.018058	1e-06	0	0	0	0	0	0.001774
ENST00000348817	ENSG00000105204	DYRK1B	0	0.017977	0	0	0	0.001222	0	0.001222	0
ENST00000647351	ENSG00000127990	SGCE	0	0.017884	0	0.000888	0	0	0	0	0
ENST00000327407	ENSG00000136696	IL36B	0	0.01774	0	0	0	0	0	0	0
ENST00000601553	ENSG00000197360	ZNF98	0	0.017689	0	0	0	0	0	0	0
ENST00000332814	ENSG00000183644	C11orf88	0	0.01763	0	0	0	0	0	0	0
ENST00000591417	ENSG00000181666	HKR1	0	0.017559	0.005384	0	0	0	0	0	0
ENST00000366089	ENSG00000138468	SENP7	0	0.017447	0	0	0	0	0	0	0
ENST00000594685	ENSG00000269404	SPIB	0	0.017288	0	0.001648	0	0	0.004951	0	0
ENST00000347529	ENSG00000159023	EPB41	0	0.01728	0	0	0	0	0	0	0
ENST00000543446	ENSG00000133704	IPO8	0	0.017153	0	0	0	0	0	0	0
ENST00000534713	ENSG00000116729	WLS	0	0.017139	0	0	0	0	0	0	0
ENST00000393703	ENSG00000137496	IL18BP	0	0.017076	0	0	0	0	0	0	0
ENST00000558812	ENSG00000068305	MEF2A	0	0.017037	0	0	0.001288	0	0	0	0
ENST00000506959	ENSG00000164292	RHOBTB3	0	0.016847	0	0	0	0	0	0	0
ENST00000448741	ENSG00000051620	HEBP2	0	0.016812	0	0	0	0	0	0	0
ENST00000382073	ENSG00000205846	CLEC6A	0	0.016643	0	0	0	0	0	0	0
ENST00000527942	ENSG00000075239	ACAT1	0	0.01653	0	0	0	0	0	0	0
ENST00000640968	ENSG00000111846	GCNT2	0	0.016321	0	0	0	0	0	0	0
ENST00000546417	ENSG00000185024	BRF1	0	0.016257	0	0	0	0	0	0	0
ENST00000564828	ENSG00000089486	CDIP1	0	0.015436	0	0	0	0	0	0	0
ENST00000565224	ENSG00000157106	SMG1	0	0.015349	0	0	0	0	0	0	0
ENST00000538211	ENSG00000155974	GRIP1	0	0.015315	0	0	0	0	0	0	0
ENST00000420643	ENSG00000119487	MAPKAP1	0	0.015266	0	0	0	0	0	0	0
ENST00000651790	ENSG00000151914	DST	0	0.015138	0	0	0.003026	0	0	0	0
ENST00000372056	ENSG00000122367	LDB3	0	0.014929	0	0	0	0	0	0	0
ENST00000420176	ENSG00000198885	ITPRIPL1	0	0.014913	0	0	0	0	0	0	0
ENST00000442195	ENSG00000136147	PHF11	0	0.014815	0	0	0	0	0	0	0
ENST00000550607	ENSG00000172602	RND1	0	0.014536	0	0	0	0	0	0	0
ENST00000571566	ENSG00000132361	CLUH	0	0.014429	0	0	0	0	0	0	0
ENST00000413380	ENSG00000048052	HDAC9	0	0.014307	0	0	0	0	0	0	0
ENST00000393423	ENSG00000205517	RGL3	0	0.014205	0	0	0	0	0.002182	0	0
ENST00000562319	ENSG00000099364	FBXL19	0	0.014089	0	0	0	0	0	0	0
ENST00000538700	ENSG00000171792	RHNO1	0	0.014066	0	0	0	0	0.005042	0	0
ENST00000533174	ENSG00000131781	FMO5	0	0.013927	0	0	0	0	0	0	0
ENST00000435339	ENSG00000147145	LPAR4	0	0.013904	0	0	0	0	0	0	0
ENST00000334482	ENSG00000167815	PRDX2	0.000216	0.013873	0	0.000105	0	0	0	0	0.00079
ENST00000414785	ENSG00000106397	PLOD3	0	0.013824	0	0	0	0	0	0	0
ENST00000287820	ENSG00000132170	PPARG	0	0.01379	0	0	0	0	0	0	0
ENST00000557596	ENSG00000182256	GABRG3	0	0.013642	0	0	0	0	0	0	0
ENST00000369788	ENSG00000138172	CALHM2	0	0.013513	0	0	0	0.000282	0	0.000282	0
ENST00000367497	ENSG00000116679	IVNS1ABP	0	0.013479	0	0	0	0	0	0	0
ENST00000458722	ENSG00000059377	TBXAS1	0	0.013442	0	0	0	0	0	0	0
ENST00000329563	ENSG00000100300	TSPO	0	0.013391	0	0	0	0.00286	0	0.00286	0
ENST00000601770	ENSG00000167772	ANGPTL4	0	0.013182	0	0	0	0	0	0	0
ENST00000382821	ENSG00000169314	C22orf15	0	0.013078	0	0	0	0	0	0	0
ENST00000590287	ENSG00000074657	ZNF532	0	0.013054	0	0	0	0	0	0	0
ENST00000460769	ENSG00000118515	SGK1	0	0.012989	0	0	0	0	0	0	0
ENST00000486728	ENSG00000186891	TNFRSF18	0	0.012835	0	0	0	0	0	0	0
ENST00000613352	ENSG00000278646	AC008162.2	0	0.012805	0	0	0	0	0	0	0
ENST00000595950	ENSG00000076944	STXBP2	0	0.012613	0	0	0	0	0	0	0
ENST00000420670	ENSG00000187764	SEMA4D	0.000485	0.012499	0	0	0	0	0	0	0
ENST00000324172	ENSG00000164483	SAMD3	0	0.012494	0	0	0	0	0	0	0.003309
ENST00000597718	ENSG00000130475	FCHO1	0	0.012486	0	0	0	0	0	0	0
ENST00000487572	ENSG00000121542	SEC22A	2.6e-05	0.012082	0	0.000299	0	6.1e-05	5.3e-05	6.1e-05	9e-05
ENST00000628562	ENSG00000227877	MRLN	0	0.012049	0	0	0	0	0	0	0
ENST00000630530	ENSG00000102178	UBL4A	0	0.011996	0	0	0	0	0	0	0
ENST00000588693	ENSG00000184988	TMEM106A	0	0.011823	0	0	0	0	0	0	0
ENST00000344575	ENSG00000188763	FZD9	0	0.011813	0	0	0	0	0	0	0
ENST00000523054	ENSG00000006837	CDKL3	0	0.011627	0	0	0	0	0	0	0
ENST00000621082	ENSG00000234965	SHISA8	0	0.011543	0	0	0	0	0	0	0
ENST00000299001	ENSG00000134627	PIWIL4	0.000443	0.011523	0	0	0	0	0	0	0
ENST00000478774	ENSG00000082482	KCNK2	0	0.011501	0	0	0	0	0	0	0
ENST00000512509	ENSG00000150625	GPM6A	0	0.011433	0	0	0	0	0	0	0
ENST00000457093	ENSG00000234965	SHISA8	0	0.011266	0	0	0	0	0	0	0
ENST00000602731	ENSG00000133640	LRRIQ1	0.004735	0.011215	0	0	0	0	0	0	0
ENST00000551118	ENSG00000138346	DNA2	0	0.011134	0	0	0	0	0	0	0
ENST00000414568	ENSG00000188191	PRKAR1B	0	0.010986	0	0	0	0	0	0	0
ENST00000228463	ENSG00000110876	SELPLG	0	0.010902	0	0.000658	0	0	0	0	0
ENST00000645434	ENSG00000187554	TLR5	0	0.010873	0	0	0	0	0	0	0
ENST00000643074	ENSG00000166682	TMPRSS5	0	0.010751	0	0	0	0	0.000271	0	0
ENST00000444735	ENSG00000085978	ATG16L1	0	0.010657	0	0	0	0	0	0	0
ENST00000547759	ENSG00000064763	FAR2	0	0.010436	0	0	0	0	0	0	0
ENST00000372384	ENSG00000157514	TSC22D3	0	0.01043	0	0	0.000163	0	0	0	0
ENST00000618348	ENSG00000197978	GOLGA6L9	0	0.010391	0	0	0	0.001931	0	0.001931	0
ENST00000400069	ENSG00000250305	TRMT9B	0	0.010287	0	0	0	0	0	0	0
ENST00000320048	ENSG00000176567	OR4X1	0	0.010165	0	0	0	0	0	0	0
ENST00000369582	ENSG00000135346	CGA	0	0.010133	0	0	0	0	0	0	0
ENST00000431961	ENSG00000170873	MTSS1	0	0.009995	0	0	0	0	0	0	0
ENST00000449622	ENSG00000160221	GATD3A	0	0.00999	0	0	0	0	0	0	0.001286
ENST00000620044	ENSG00000007047	MARK4	0	0.009879	0	0	0.000167	0	0	0	0
ENST00000536306	ENSG00000033030	ZCCHC8	0	0.009771	0	0	0	0	0	0	0
ENST00000566189	ENSG00000196502	SULT1A1	0	0.009737	0	0.003108	0	0	0	0	0
ENST00000600080	ENSG00000123815	COQ8B	0	0.009732	0	0	0	0.004136	0	0.004136	0
ENST00000532596	ENSG00000104529	EEF1D	0	0.009473	0	0	0	0	0	0	0
ENST00000355512	ENSG00000182732	RGS6	0	0.009307	0	0	0	0	0	0	0
ENST00000513245	ENSG00000129116	PALLD	0	0.009248	0	0	0	0	0	0	0
ENST00000577457	ENSG00000068489	PRR11	0	0.009194	6.2e-05	0.000671	1e-06	0	2e-06	0	1e-06
ENST00000333972	ENSG00000240771	ARHGEF25	0	0.009032	0	0	0	0	0	0	0.002568
ENST00000413632	ENSG00000152936	LMNTD1	0	0.009011	0	0	0	0	0	0	0.000211
ENST00000542846	ENSG00000184154	LRTOMT	0	0.008984	0	0	0	0	0	0	0
ENST00000533426	ENSG00000132259	CNGA4	0	0.008906	0	0	0	0	0	0	0
ENST00000330500	ENSG00000184022	OR2T10	0	0.008895	0	0	0	0	0	0	0
ENST00000243967	ENSG00000124143	ARHGAP40	0	0.00886	0	0	0	0	0	0	0
ENST00000370196	ENSG00000107807	TLX1	0	0.00884	0	0	0	0	0	0	0
ENST00000621150	ENSG00000118503	TNFAIP3	0.000137	0.008838	0.000818	0.000142	0.000771	0.000434	0.000308	0.000434	0.000234
ENST00000636092	ENSG00000198689	SLC9A6	0	0.008766	0	0	0	0	0	0	0
ENST00000389050	ENSG00000183977	PP2D1	0	0.008676	0	0	0	0	0	0	0
ENST00000332955	ENSG00000182264	IZUMO1	0	0.008634	0	0	0	0	0	0	0
ENST00000461079	ENSG00000106336	FBXO24	0	0.008609	0	0	0	0	0	0	0
ENST00000236914	ENSG00000116833	NR5A2	0	0.008563	0	0.000153	0	0	0	0	0
ENST00000488580	ENSG00000174500	GCSAM	0	0.008523	0	0	0	0	0	0	0
ENST00000580592	ENSG00000008283	CYB561	0	0.008471	0	0	0	0	0	0	0
ENST00000378043	ENSG00000167995	BEST1	0	0.008174	0	0	0	0	0.001476	0	0
ENST00000399135	ENSG00000159261	CLDN14	0	0.008072	0	0	0	0	0	0	0
ENST00000395052	ENSG00000164082	GRM2	0	0.007908	0	0	0	0	0	0	0
ENST00000593489	ENSG00000127220	ABHD8	0	0.007846	0	0	0	0	0	0	0
ENST00000374461	ENSG00000165124	SVEP1	0	0.007798	0	0	0	0	0.002878	0	0
ENST00000220876	ENSG00000104435	STMN2	0	0.007646	0	0	0	0	0	0	0
ENST00000338901	ENSG00000158813	EDA	0	0.007568	0	0	0	0	0	0	0
ENST00000361664	ENSG00000198723	TEX45	0	0.007537	0	0	0	0.003218	0	0.003218	0
ENST00000264784	ENSG00000109667	SLC2A9	0	0.007509	0	0	0	0	0	0	0
ENST00000343694	ENSG00000124232	RBPJL	0	0.007459	0	0	0	0	0	0	0
ENST00000565051	ENSG00000140398	NEIL1	0	0.007451	0	0	0	0	0	0	1.4e-05
ENST00000617266	ENSG00000196152	ZNF79	0	0.007418	0	0	0	0	0	0	0
ENST00000377167	ENSG00000204700	OR2J2	0	0.007336	0	0	0	0	0	0	0
ENST00000506578	ENSG00000161904	LEMD2	0	0.007257	0	2.9e-05	0	2.9e-05	0	2.9e-05	0.000312
ENST00000356719	ENSG00000162929	KIAA1841	0	0.007255	0	0	0	0	0	0	0
ENST00000588871	ENSG00000119559	C19orf25	0	0.007238	0	0	0	0	0	0	0
ENST00000503423	ENSG00000145362	ANK2	0	0.00712	0	0	0	0	0	0	0
ENST00000612142	ENSG00000197253	TPSB2	0	0.006902	0	0	0	0	0	0	0
ENST00000529854	ENSG00000104518	GSDMD	0	0.006799	0	0	0	0	0	0	0
ENST00000565559	ENSG00000092529	CAPN3	0	0.006648	0	0	0	0	0	0	0
ENST00000558567	ENSG00000140153	WDR20	0	0.006635	0	0	0	0	0	0	0
ENST00000436351	ENSG00000166394	CYB5R2	0	0.006607	0	0	0	0	0	0	0
ENST00000536146	ENSG00000125409	TEKT3	0	0.00658	0	0	0	0	0	0	0.001854
ENST00000312457	ENSG00000175514	GPR152	0	0.00653	0	0	0	0	0	0	0
ENST00000530004	ENSG00000085831	TTC39A	0	0.006475	0	0	0	0	0	0	0
ENST00000439340	ENSG00000144331	ZNF385B	0	0.006432	0	0	0	0	0	0	0
ENST00000521967	ENSG00000186335	SLC36A2	0	0.006301	0	0	0	0	0	0	0
ENST00000591265	ENSG00000172006	ZNF554	0	0.006239	0	0	0	0	0	0	0
ENST00000379538	ENSG00000064692	SNCAIP	0	0.006227	0	0	0	0	0	0	0
ENST00000444911	ENSG00000161381	PLXDC1	0	0.00619	0	0	0	0	0	0	0
ENST00000323830	ENSG00000178772	CPN2	0.002579	0.006149	0	0	0	0	0	0	0
ENST00000592320	ENSG00000131095	GFAP	0	0.006083	0	0	0	0	0	0	0
ENST00000299340	ENSG00000166265	CYYR1	0	0.006075	0	0	0	0.002398	0	0.002398	0
ENST00000246896	ENSG00000126550	HTN1	0	0.006073	0	0	0	0	0	0	0
ENST00000419131	ENSG00000104313	EYA1	0	0.005971	0	0	0.000448	0	0	0	0
ENST00000285928	ENSG00000155530	LRGUK	0	0.005816	0	0	0	0	0.001372	0	0.000964
ENST00000422425	ENSG00000163803	PLB1	0	0.005815	0	0	0	0	0	0	0
ENST00000612583	ENSG00000214946	TBC1D26	0	0.005792	0	0	0	0	0	0	0
ENST00000439435	ENSG00000196468	FGF16	0	0.005636	0	0	0	0	0	0	0
ENST00000374314	ENSG00000204175	GPRIN2	0	0.005502	0	0	0	0	0	0	0
ENST00000440446	ENSG00000178075	GRAMD1C	0	0.0055	0	0	0	0	0	0	0
ENST00000541674	ENSG00000185864	NPIPB4	0	0.005489	0	0.000647	0	0	0	0	0
ENST00000520567	ENSG00000079841	RIMS1	0	0.005484	0	0	0	0	0	0	0.002152
ENST00000590751	ENSG00000180479	ZNF571	0	0.005471	0	0	0	0	0	0	0
ENST00000588764	ENSG00000132000	PODNL1	0	0.005376	0	0	0	0	0	0	0
ENST00000592685	ENSG00000065989	AC011529.1	0.000114	0.005273	0	0	0	0	0	0	8.4e-05
ENST00000231420	ENSG00000113492	AGXT2	0	0.0052	0	0	0	0	0	0	0
ENST00000595549	ENSG00000130475	FCHO1	0	0.005175	0	0	0	0	0	0	0
ENST00000648106	ENSG00000157193	LRP8	0	0.00512	0	0	0	0	0	0	0
ENST00000272425	ENSG00000144035	NAT8	0	0.005116	0	0	0	0	0	0	0
ENST00000411819	ENSG00000116062	MSH6	0	0.005091	0	0	0	0	0	0	0
ENST00000403915	ENSG00000170745	KCNS3	0	0.005038	0	0	0	0	0	0	0
ENST00000367357	ENSG00000116833	NR5A2	0	0.004944	0	0	0	0	0	0	0
ENST00000640702	ENSG00000268902	CSAG2	0	0.004943	0	0	0	0	0	0	0
ENST00000641141	ENSG00000159961	OR3A3	0	0.004911	0	0	0	0	0	0	0
ENST00000514416	ENSG00000145681	HAPLN1	0	0.004896	0	0	0	0	0	0	0
ENST00000648878	ENSG00000198589	LRBA	0	0.004799	0	0	0	0	0	0	0
ENST00000491063	ENSG00000121749	TBC1D15	0.001967	0.004788	0	0	0	0	0	0	0
ENST00000400163	ENSG00000134871	COL4A2	0	0.004727	0	0	0	0	0	0	0
ENST00000251296	ENSG00000117154	IGSF21	0	0.004718	0	0	0.000975	0	0	0	0
ENST00000505545	ENSG00000034533	ASTE1	0	0.004678	0	0	0	0	0	0	0
ENST00000274721	ENSG00000146013	GFRA3	0	0.004648	0	0	0	0	0	0	0
ENST00000449047	ENSG00000109339	MAPK10	0	0.004633	0	0	0	0	0	0	0.001322
ENST00000159060	ENSG00000074771	NOX3	0	0.00457	0	0	0	0	0	0	0
ENST00000309881	ENSG00000135218	CD36	0	0.004522	0	0	0	0	0	0	0
ENST00000379288	ENSG00000162571	TTLL10	0	0.004414	0	0	0	0	0	0	0
ENST00000531410	ENSG00000079819	EPB41L2	0	0.00435	0	0	0	0	0	0	0
ENST00000369389	ENSG00000148737	TCF7L2	0	0.004334	0	0	0	0	0	0	0
ENST00000432514	ENSG00000188958	UTS2B	0	0.004315	0	0	0	0	0	0	0.001744
ENST00000244576	ENSG00000124613	ZNF391	0	0.004315	0.001038	0	0	0	0	0	0
ENST00000617334	ENSG00000132554	RGS22	0	0.004284	0	0	0	0	0	0	0.000529
ENST00000433387	ENSG00000138892	TTLL8	0	0.004251	0	0	0	0	0	0	0
ENST00000252318	ENSG00000130035	GALNT8	0	0.004209	0	0	0	0	0	0	0
ENST00000408955	ENSG00000221910	OR2F2	0	0.004188	0	0	0	0	0	0	0
ENST00000324333	ENSG00000107249	GLIS3	0	0.004048	0	0	0	0	0	0	0
ENST00000639807	ENSG00000117620	SLC35A3	0.000679	0.00398	0	0	0	0	0	0	0.000383
ENST00000455147	ENSG00000139197	PEX5	0	0.003961	0	0	0.000607	0.000199	0	0.000199	0
ENST00000383374	ENSG00000183323	CCDC125	0	0.003868	0	0	0	0	0	0	0
ENST00000439569	ENSG00000171790	SLFNL1	0	0.003815	0	0	0	0	0	0	0
ENST00000524983	ENSG00000109851	DBX1	0	0.003785	0	0	0	0	0	0	0
ENST00000574902	ENSG00000085644	ZNF213	0	0.003734	0	0	0	0	0	0	0
ENST00000253262	ENSG00000130950	NUTM2F	0	0.003716	0	0	0	0	0	0	0
ENST00000328801	ENSG00000182938	OTOP3	0	0.003709	0	0	0	0	0	0	0
ENST00000470110	ENSG00000197162	ZNF785	0	0.003589	0	0	0	0	0	0	0
ENST00000311485	ENSG00000175097	RAG2	0	0.003562	0	0	0	0	0	0	0
ENST00000644196	ENSG00000148288	GBGT1	0	0.003519	0	0	0	0	0	0	0
ENST00000330675	ENSG00000133069	TMCC2	0	0.003516	0	0	0	0	0	0	0
ENST00000542601	ENSG00000105664	COMP	0	0.003447	0	0	0	0	0	0	0
ENST00000358658	ENSG00000168060	NAALADL1	0	0.003446	0	0	0	0	0	0	0
ENST00000379453	ENSG00000171873	ADRA1D	0	0.00342	0	0	0	0	0	0	0
ENST00000568908	ENSG00000205336	ADGRG1	0	0.003419	0	0	0	0	0	0	0
ENST00000396300	ENSG00000146592	CREB5	0	0.003369	0	0	0	0	0	0	0.000766
ENST00000335658	ENSG00000121570	DPPA4	0	0.003312	0	0	0	0	0	0	0
ENST00000616727	ENSG00000173702	MUC13	0	0.003241	0	0	0	0	0	0	0
ENST00000329697	ENSG00000066813	ACSM2B	0	0.003179	0	0	0	0	0	0	0
ENST00000611340	ENSG00000112425	EPM2A	0	0.003167	0	0	0	0	0	0	0
ENST00000366942	ENSG00000042781	USH2A	0	0.00312	0	0	0	0	0	0	0
ENST00000360144	ENSG00000066468	FGFR2	0	0.003109	0	0	0	0	0	0	0
ENST00000366878	ENSG00000143502	SUSD4	0	0.003096	0	0	0	0	0	0	0
ENST00000371748	ENSG00000107187	LHX3	0	0.003	0	0	0	0	0	0	0
ENST00000638147	ENSG00000283208	AC001226.2	0	0.002983	0	0	0	0	0	0	0
ENST00000649416	ENSG00000285982	AC012213.5	0	0.002982	0	0	0	0	0	0	0
ENST00000250066	ENSG00000129204	USP6	0	0.002977	0	0	0	0	0	0	0
ENST00000395105	ENSG00000137868	STRA6	0	0.002975	0	0	0	0	0	0	0
ENST00000568665	ENSG00000261793	AL929554.1	0	0.002975	0	0	0	0	0	0	0
ENST00000319595	ENSG00000179097	HTR1F	0	0.002972	0	0	0	0	0	0	0
ENST00000642171	ENSG00000110436	SLC1A2	0	0.002933	0	0	0	0	0	0	0
ENST00000601005	ENSG00000171954	CYP4F22	0	0.002924	0	0	0	0	0	0	0
ENST00000564326	ENSG00000083799	CYLD	0	0.002908	0	0	0	0	0	0	0
ENST00000305141	ENSG00000171596	NMUR1	0	0.002897	0	0	0	0	0	0	0
ENST00000270570	ENSG00000142494	SLC47A1	0	0.002845	0	0	0	0	0	0	0
ENST00000526712	ENSG00000166391	MOGAT2	0	0.002835	0	0	0	0	0	0	0
ENST00000222002	ENSG00000105398	SULT2A1	0	0.002809	0	0	0	0	0	0	0
ENST00000299162	ENSG00000139445	FOXN4	0	0.002732	0	0	0	0	0	0	0
ENST00000591651	ENSG00000176170	SPHK1	0	0.002728	0	0	0	0	0	0	0
ENST00000375561	ENSG00000106809	OGN	0	0.002656	0	0	0	0	0	0	0
ENST00000504933	ENSG00000125388	GRK4	0	0.002648	0	0	0	0	0	0	0
ENST00000402921	ENSG00000010932	FMO1	0	0.002629	0	0	0	0	0	0	0
ENST00000613128	ENSG00000125813	PAX1	0	0.002565	0	0	0	0	0	0	0
ENST00000639793	ENSG00000132466	ANKRD17	1.2e-05	0.002556	0	0	0	0.000691	0	0.000691	0
ENST00000441391	ENSG00000141540	TTYH2	0	0.002549	0	0	0	0	0	0	0
ENST00000321489	ENSG00000157423	HYDIN	0	0.002547	0	0	0	0	0	0	0
ENST00000615958	ENSG00000151023	ENKUR	0	0.002502	0	0	0	0	0.000933	0	0
ENST00000642058	ENSG00000167822	OR8J3	0	0.002452	0	0	0	0	0	0	0
ENST00000372129	ENSG00000133124	IRS4	0	0.002376	0	0	0	0	0	0	0
ENST00000551529	ENSG00000133636	NTS	0	0.002369	0	0	0	0	0	0	0
ENST00000445327	ENSG00000141738	GRB7	0	0.002355	0	0	0	0	0	0	0
ENST00000398470	ENSG00000240542	KRTAP9-1	0	0.002354	0	0	0	0	0	0	0
ENST00000563672	ENSG00000140931	CMTM3	0	0.002351	0	0	0	0	0	0	0
ENST00000535931	ENSG00000171631	P2RY6	0	0.002333	0	0	0	0	0	0	0
ENST00000420558	ENSG00000163596	ICA1L	0	0.002311	0	0	0	0	0	0	0
ENST00000492807	ENSG00000152822	GRM1	0	0.002299	0	0	0	0	0	0	0
ENST00000464832	ENSG00000128596	CCDC136	0	0.002298	0	0	0	0	0	0	0
ENST00000409464	ENSG00000180336	MEIOC	0	0.002294	0	0	0	0	0	0	0
ENST00000485352	ENSG00000018408	WWTR1	0	0.002278	0	0	0	0	0	0	0
ENST00000360284	ENSG00000123358	NR4A1	0	0.002234	0	0	0	0	0	0	0
ENST00000234701	ENSG00000016490	CLCA1	0	0.002232	0	0	0	0	0	0	0
ENST00000265012	ENSG00000111846	GCNT2	0	0.002214	0	0	0	0	0	0	0
ENST00000619213	ENSG00000277322	GOLGA6L6	0	0.002209	0	0	0	0	0	0	0
ENST00000316073	ENSG00000215853	RPTN	0	0.002113	0	0	0	0	0	0	0
ENST00000537702	ENSG00000172915	NBEA	0	0.002089	0	0	0	0	0	0	0.000523
ENST00000370899	ENSG00000259030	FPGT-TNNI3K	0	0.002068	0	0	0	0	0	0	0
ENST00000540581	ENSG00000160325	CACFD1	6e-05	0.002057	0	0	1e-06	0	0	0	2e-06
ENST00000296946	ENSG00000164458	TBXT	0	0.001972	0	0	0	0	0	0	0
ENST00000375613	ENSG00000204382	XAGE1B	0	0.001918	0	0	0	0	0	0	0
ENST00000358929	ENSG00000049540	ELN	0	0.001904	0	0	0	0	0	0	0
ENST00000374552	ENSG00000158813	EDA	0	0.001782	0	0	0	0	0	0	0
ENST00000393067	ENSG00000110777	POU2AF1	0	0.001779	0	0	0	0	0	0	0
ENST00000542967	ENSG00000171681	ATF7IP	0	0.001765	0	0	0	0	0	0	0
ENST00000423245	ENSG00000108469	RECQL5	0	0.001744	0	0	0	0	0.000727	0	0
ENST00000440022	ENSG00000163576	EFHB	0	0.001727	0	0	0	0	0	0	0
ENST00000594691	ENSG00000236383	CCDC200	0	0.001725	0	0	0	0	0	0	0
ENST00000650733	ENSG00000169255	B3GALNT1	0	0.001709	0	0	0	0	0	0	0
ENST00000621651	ENSG00000171487	NLRP5	0	0.001691	0	0	0	0	0	0	0
ENST00000542051	ENSG00000148702	HABP2	0	0.001682	0	0	0	0	0	0	0
ENST00000633214	ENSG00000105261	OVOL3	0	0.001658	0	0.000172	0	0.000287	0	0.000287	0
ENST00000432456	ENSG00000138376	BARD1	7e-06	0.001652	3e-06	3e-06	1e-05	0	0	0	0
ENST00000355504	ENSG00000196268	ZNF493	0	0.001541	0	0	0	0	0	0	0
ENST00000641398	ENSG00000094661	OR1I1	0	0.001539	0	0	0	0	0	0	0
ENST00000622132	ENSG00000085563	ABCB1	0	0.001487	0	0	0	0	0	0	0
ENST00000461077	ENSG00000135423	GLS2	0	0.001428	0	0	0	0	0	0	0
ENST00000562196	ENSG00000260691	ANKRD20A1	0	0.001381	0	0	0	0	0	0	0
ENST00000557010	ENSG00000211448	DIO2	0	0.001322	0	0	0	0	0	0	0
ENST00000456367	ENSG00000184226	PCDH9	0	0.00129	0	0	0	0	0	0	0
ENST00000591635	ENSG00000134775	FHOD3	0	0.001284	0	0	0	0	0	0	0
ENST00000527087	ENSG00000166435	XRRA1	0	0.001265	0	0	0	0	0	0	0.000164
ENST00000649704	ENSG00000151611	MMAA	0	0.001254	0	0	0	0	0	0	0
ENST00000421127	ENSG00000159588	CCDC17	0	0.001245	0	0	0	0	0	0	0
ENST00000603302	ENSG00000138796	HADH	0	0.001244	0	0	0	0	0	0	0
ENST00000557284	ENSG00000259030	FPGT-TNNI3K	0.000425	0.001217	0	0	0	0	0	0	0
ENST00000462247	ENSG00000225830	ERCC6	0	0.001217	0	0	0	0	0	0	0
ENST00000642316	ENSG00000105357	MYH14	0	0.001185	0	0	0	0	0	0	0
ENST00000651332	ENSG00000197134	ZNF257	0	0.001118	0	0	0	0	0	0	0
ENST00000376473	ENSG00000204564	C6orf136	0	0.001088	0	0	0	0	0	0	0
ENST00000270722	ENSG00000142611	PRDM16	0	0.001073	0	0	0	0	0	0	0.000124
ENST00000532993	ENSG00000196914	ARHGEF12	0	0.001066	0	0	0	0	0	0	0
ENST00000439118	ENSG00000198885	ITPRIPL1	0	0.001055	0	0	0	0	0	0	0
ENST00000641341	ENSG00000109339	MAPK10	0	0.001054	0	0	0	0	0	0	0
ENST00000541762	ENSG00000135083	CCNJL	8e-05	0.001039	0	0	0.000159	0	0	0	0
ENST00000586683	ENSG00000130165	ELOF1	0	0.001012	0	0	0	0	0	0	0
ENST00000455903	ENSG00000155636	RBM45	0	0.00097	0	0	0	0	0	0	0
ENST00000485419	ENSG00000283154	IQCJ-SCHIP1	0	0.000941	0	0	0	0	0	0	0
ENST00000324000	ENSG00000177511	ST8SIA3	0	0.000925	0	0	0	0	0	0	0
ENST00000621645	ENSG00000269713	NBPF9	0	0.000913	0	0	0	0	0	0	0
ENST00000509865	ENSG00000150625	GPM6A	0	0.000903	0	0	0	0	0	0	0
ENST00000561286	ENSG00000100889	PCK2	0	0.000884	0	0	0	0	0	0	0
ENST00000381946	ENSG00000075673	ATP12A	0	0.000867	0	0	0	0	0	0	0
ENST00000256509	ENSG00000134121	CHL1	0	0.000819	0	0	0	0	0	0	0
ENST00000641051	ENSG00000109339	MAPK10	0	0.000801	0	0	0	0	0	0	0.000166
ENST00000381879	ENSG00000168781	PPIP5K1	0	0.000774	0	0	0	0	0	0	0
ENST00000371497	ENSG00000182463	TSHZ2	0	0.000763	0	0	0	0	0	0	0
ENST00000240499	ENSG00000131127	ZNF141	0	0.000741	0	0	0	0	0	0	0
ENST00000539504	ENSG00000131018	SYNE1	0	0.000636	0	0	0	0	0	0	0
ENST00000634739	ENSG00000058272	PPP1R12A	0	0.000621	0	0	0	0	0	0	0
ENST00000522655	ENSG00000165156	ZHX1	0	0.000593	0	4.3e-05	0	0	0	0	8.6e-05
ENST00000442466	ENSG00000162006	MSLNL	0	0.000578	0	0	0	0	0	0	0
ENST00000316399	ENSG00000110693	SOX6	0	0.000543	0	0	0	0	0	0	0
ENST00000379936	ENSG00000132259	CNGA4	0	0.000534	0	0	0	0	0	0	0
ENST00000306151	ENSG00000169876	MUC17	0	0.000502	0	0	0	0	0	0	0
ENST00000538456	ENSG00000127616	SMARCA4	0	0.000498	0	0	0	0	0	0	0
ENST00000613764	ENSG00000132849	PATJ	0	0.000424	0	0	0	0	0	0	0
ENST00000557821	ENSG00000137841	PLCB2	0	0.000408	0	0	0	0	0	0	0
ENST00000538924	ENSG00000068615	REEP1	2e-06	0.000395	0	0	0	0	0	0	0
ENST00000420489	ENSG00000198515	CNGA1	0	0.000385	0	0	0	0	0	0	0
ENST00000569266	ENSG00000172775	FAM192A	0	0.000364	0	0	0	1e-06	0	1e-06	0
ENST00000651791	ENSG00000169255	B3GALNT1	0	0.000313	0	0	0	0	0	0	0
ENST00000642040	ENSG00000073910	FRY	0	0.0003	0	0	0	0	0	0	0
ENST00000521810	ENSG00000104497	SNX16	0	0.000271	0	0	0	0	0	0	0
ENST00000568065	ENSG00000169180	XPO6	0	0.000212	0	0	0	0	0	0	0
ENST00000525745	ENSG00000093144	ECHDC1	0	0.000198	0	0	0	0	0	0	0
ENST00000426488	ENSG00000167394	ZNF668	0	0.000181	0	0	0	0	0	0	0
ENST00000521826	ENSG00000164609	SLU7	2.2e-05	0.000181	0	0	0	0	0	0	0
ENST00000394629	ENSG00000157214	STEAP2	0	0.000179	0	0	0	0	0	0	0
ENST00000394162	ENSG00000064225	ST3GAL6	0	0.000165	0	0	0	0	0	0	0
ENST00000613264	ENSG00000064225	ST3GAL6	0	0.000144	0	0	0	0	0	0	0
ENST00000547204	ENSG00000101199	ARFGAP1	0	0.000131	0	0	0	0	0	0	0
ENST00000433372	ENSG00000163738	MTHFD2L	0	0.000129	0	0	0	0	0	0	0
ENST00000448243	ENSG00000122483	CCDC18	0	0.000114	0	0	0	1e-06	0	1e-06	1e-06
ENST00000587323	ENSG00000099622	CIRBP	0	0.000114	0	0	0	0	0	0	0
ENST00000397601	ENSG00000139793	MBNL2	2.1e-05	7.3e-05	0	0	0	0	0	0	0
ENST00000406453	ENSG00000164638	SLC29A4	0	5.7e-05	0	0	0	0	0	0	0
ENST00000645303	ENSG00000110436	SLC1A2	0	5.5e-05	0	0	0	0	0	0	0
ENST00000548438	ENSG00000111245	MYL2	0	4.7e-05	0	0	0	0	0	0	0
ENST00000628980	ENSG00000187391	MAGI2	0	3.3e-05	0	0	0	0	0	0	0
ENST00000404858	ENSG00000163803	PLB1	0	3e-05	0	0	0	0	0	0	0
ENST00000344799	ENSG00000189108	IL1RAPL2	0	3e-05	0	0	0	0	0	0	0
ENST00000538554	ENSG00000149716	LTO1	0	2.9e-05	0	0	0	0	0	0	0
ENST00000526560	ENSG00000111011	RSRC2	0	2.2e-05	0	0	0	0	0	0	0
ENST00000379812	ENSG00000137074	APTX	0	1.4e-05	0	0	0	0	0	0	0
ENST00000548315	ENSG00000151239	TWF1	0	6e-06	0	0	0	0	0	0	0
ENST00000450494	ENSG00000139514	SLC7A1	0	6e-06	0	0	0	0	0	0	0
ENST00000572820	ENSG00000167371	PRRT2	0	2e-06	0	0	0	0	0	0	0
ENST00000506745	ENSG00000163138	PACRGL	0	1e-06	0	0	0	0	0	0	0

## Sheet: mRNA_UV_cluster 3
transcript_id	gene_id	gene_name	C_0	UV_3	UV_6	UV_9	UV_12	UV_24	UV_48	UV_24	UV_96
ENST00000590665	ENSG00000152234	ATP5F1A	0	0	256.633	0	0	0	0	0	0
ENST00000432588	ENSG00000075624	ACTB	72.3912	0	198.374	0	0	0.004266	0.000988	0.004266	0
ENST00000394202	ENSG00000117519	CNN3	5.48554	10.2352	78.1589	6.33188	12.4686	9.24309	39.5951	9.24309	13.2848
ENST00000330072	ENSG00000053371	AKR7A2	2.4817	1.79901	39.4461	0	5.56209	2.53031	26.7981	2.53031	0.875195
ENST00000618164	ENSG00000149196	HIKESHI	0.028224	0.008207	35.2996	0.012921	0.006526	0.007648	0.032333	0.007648	0.007183
ENST00000515792	ENSG00000145425	RPS3A	1.36214	0	29.1039	0.588809	0	0	0	0	0.782913
ENST00000311351	ENSG00000175324	LSM1	8.93578	0.168583	21.7903	0.046223	0.03941	0.766267	0.129657	0.766267	1.05431
ENST00000378634	ENSG00000172301	COPRS	0.665274	1.01469	20.6208	1.21873	1.60047	1.24556	0.739658	1.24556	1.00385
ENST00000376918	ENSG00000161671	EMC10	0.481917	2.59851	20.2382	2.78914	3.20083	1.38403	0.84415	1.38403	0.659052
ENST00000354497	ENSG00000133318	RTN3	0.066553	0.263263	19.2382	0.709176	1.04903	0	0.38409	0	0
ENST00000544379	ENSG00000175768	TOMM5	0.15431	0.107143	18.5579	0.139119	0.228543	0.051604	0.114964	0.051604	0.034825
ENST00000393562	ENSG00000160211	G6PD	0.335723	2.92299	15.6042	0.009161	10.5421	1.72351	0.144864	1.72351	0.061968
ENST00000646932	ENSG00000136143	SUCLA2	0.005336	0.020854	14.5011	0.036436	0.125889	0.065718	0.00284	0.065718	4.48743
ENST00000366647	ENSG00000116906	GNPAT	2.5217	2.107	14.3836	1.38551	1.50916	1.43758	1.73574	1.43758	1.50667
ENST00000621467	ENSG00000155755	TMEM237	2.46262	1.07474	14.2155	0.827756	0.00074	0.476339	0.759487	0.476339	1.56479
ENST00000552540	ENSG00000196531	NACA	0.121269	0	13.1075	0	0.060376	0	0.019586	0	1.67425
ENST00000299626	ENSG00000159063	ALG8	0.686589	1.19562	12.6099	0.670089	0.510978	0.574408	1.83851	0.574408	0.503019
ENST00000588695	ENSG00000127445	PIN1	2.41872	0.6058	11.7847	0.4707	0.884894	0.509891	0.339787	0.509891	0.399477
ENST00000589575	ENSG00000011304	PTBP1	0	0	11.5244	0	0	0	0	0	4.28043
ENST00000646735	ENSG00000100983	GSS	0.151334	0	11.3872	0.85201	0.031878	0.176998	0.097259	0.176998	0
ENST00000359032	ENSG00000196961	AP2A1	3.43572	0	10.5309	0	0.000124	1.79723	0.001448	1.79723	0.000672
ENST00000314852	ENSG00000177971	IMP3	0	0	10.3968	0	0.000177	0.000316	0	0.000316	0
ENST00000469360	ENSG00000065150	IPO5	0	0.790008	9.10754	0	0.001531	0.333198	0.271984	0.333198	0.000926
ENST00000645753	ENSG00000027697	IFNGR1	0	1.88537	9.03553	3.47746	0	0.225303	0	0.225303	0.720257
ENST00000408941	ENSG00000116171	SCP2	0.356682	0.472377	8.42179	0.361624	0.401721	0.383202	0.464059	0.383202	0.345608
ENST00000373498	ENSG00000119487	MAPKAP1	0.042956	0.034825	8.13193	1.01576	0.044097	1.76618	0.302576	1.76618	0.10195
ENST00000538171	ENSG00000126602	TRAP1	0	0	8.12292	0	1.33468	0	0	0	2.18132
ENST00000458695	ENSG00000162521	RBBP4	0.035548	0.542783	6.66483	0.848707	0.487541	1.52465	0	1.52465	0.063
ENST00000527759	ENSG00000029363	BCLAF1	0.0018	0.121965	6.35716	0.001766	0.000255	0.00249	0.001768	0.00249	0.000959
ENST00000613923	ENSG00000062822	POLD1	1.01213	0.225443	6.24392	0.18226	0.028385	0.021466	0.058298	0.021466	0.661997
ENST00000402003	ENSG00000119801	YPEL5	0.207334	0.440806	6.15411	0.128772	0.886921	0.163749	0.236159	0.163749	0.673163
ENST00000401675	ENSG00000250479	CHCHD10	0	0.507142	5.80582	0.453073	0	0.326767	0.34959	0.326767	0
ENST00000451521	ENSG00000204536	CCHCR1	0	0	5.60652	0	0	0	0	0	0
ENST00000612035	ENSG00000006125	AP2B1	0.001387	0.262764	5.51735	0.087878	0.069402	0.955312	0.01408	0.955312	0.707002
ENST00000451652	ENSG00000119333	WDR34	0.053504	0.293229	5.12285	0.378593	0.306644	0.200785	0.482906	0.200785	0.327022
ENST00000637872	ENSG00000104763	ASAH1	0.409883	0.184605	5.04783	0	0	0	0.082342	0	0.113639
ENST00000367440	ENSG00000023572	GLRX2	0.047839	0	5.00378	0	0.197533	0.054756	0	0.054756	0.043143
ENST00000458659	ENSG00000102804	TSC22D1	1.23224	0.546107	4.99871	0.575863	0.493772	0.700945	0.655495	0.700945	0.614513
ENST00000405333	ENSG00000115758	ODC1	1.72864	0.410859	4.79756	0.259097	0.330066	0.237265	0.155945	0.237265	0.111136
ENST00000546544	ENSG00000135469	COQ10A	0.177462	0.172237	4.7401	0.139987	0.197542	0.119415	0.123904	0.119415	0.141658
ENST00000550345	ENSG00000152556	PFKM	0.799108	0	4.71004	0	0	0	0.002282	0	0
ENST00000353689	ENSG00000100814	CCNB1IP1	0	0.547056	4.60536	0.172961	0.519391	0.25777	0	0.25777	0.15436
ENST00000428358	ENSG00000243207	PPAN-P2RY11	0.972608	0.29862	4.58999	0.808378	0.241964	0.04682	0.258045	0.04682	0.455748
ENST00000377661	ENSG00000164574	GALNT10	1.04722	0	4.52208	1.65561	0	0	0	0	0
ENST00000539476	ENSG00000174238	PITPNA	0.304504	0.762978	4.51826	0.065381	0.070917	4.38215	0	4.38215	0
ENST00000415920	ENSG00000214078	CPNE1	0.624146	0.193751	4.49305	0.161064	0.626976	0.185349	0.158169	0.185349	0.278371
ENST00000423894	ENSG00000187118	CMC1	0.305582	0.005477	4.48535	0.007061	0.006028	0.003623	0.004645	0.003623	0.006572
ENST00000271877	ENSG00000143569	UBAP2L	0.589575	0.102546	4.43288	0.0953	0.116413	0	0.089679	0	0.12665
ENST00000622786	ENSG00000089737	DDX24	1.1e-05	3.3e-05	4.41439	1.6e-05	5e-05	7.1e-05	5.9e-05	7.1e-05	3.2e-05
ENST00000519582	ENSG00000132561	MATN2	0.044666	0.012085	4.38178	0.002237	0.949977	2.21417	0.040718	2.21417	0.034241
ENST00000259818	ENSG00000137285	TUBB2B	0.002203	0.002427	4.15663	0.226575	0	2.12	0.082865	2.12	0.006166
ENST00000536860	ENSG00000165304	MELK	0.966553	0.161985	4.12319	0.523022	0.366867	0.190346	1.17063	0.190346	0.172531
ENST00000453396	ENSG00000235453	SMIM27	0	0	4.11058	0	0	0	0	0	0.926298
ENST00000025008	ENSG00000023287	RB1CC1	0.518768	0.293897	4.0633	0.148524	0.249518	0.494713	0.307189	0.494713	0.28611
ENST00000396467	ENSG00000147604	RPL7	0.155459	0.098845	4.01245	0.129585	0.138218	0.19253	0.587928	0.19253	2.79087
ENST00000415136	ENSG00000244038	DDOST	0.299903	0.126346	3.98189	0.192141	0.10856	2.99966	0.132399	2.99966	0.194911
ENST00000646305	ENSG00000101266	CSNK2A1	0.001767	0.083677	3.87046	0.014875	0.0055	0.004381	0.002992	0.004381	0.001906
ENST00000507751	ENSG00000204536	CCHCR1	0	0.20704	3.57582	0.344627	0	0	0	0	0
ENST00000593105	ENSG00000187607	ZNF286A	0.478151	0.002199	3.5445	0.06713	0.083747	0	0	0	0
ENST00000520417	ENSG00000113558	SKP1	0.288951	0.365319	3.50096	0.1855	0.256359	0.413614	0.433543	0.413614	0.234809
ENST00000407298	ENSG00000179750	APOBEC3B	0	0	3.48889	0	0	0	0	0	2.12173
ENST00000529631	ENSG00000167996	FTH1	0	0	3.48179	0	0	0	0	0	1.99408
ENST00000359574	ENSG00000106003	LFNG	1.80036	0.07845	3.4311	0.034121	0.042169	0.033951	0.042605	0.033951	0.634395
ENST00000589971	ENSG00000130733	YIPF2	0	0	3.3622	0	2.776	0	0	0	0
ENST00000407610	ENSG00000131732	ZCCHC9	0.084306	1.11695	3.15204	0.006351	1.36077	0.005462	0	0.005462	0
ENST00000351288	ENSG00000136699	SMPD4	0.006536	0.004321	3.15192	0.125274	0.005878	0.146454	0.048095	0.146454	0.010364
ENST00000616279	ENSG00000134318	ROCK2	0.329079	0	3.08821	0.139602	0.049016	0.0598	0	0.0598	0.873728
ENST00000578168	ENSG00000169727	GPS1	0.379625	0	3.04598	0	0	0.178653	0.312008	0.178653	0.466991
ENST00000373600	ENSG00000119408	NEK6	0.627712	0.144755	2.92678	0.075789	0.001928	0.274067	0.581284	0.274067	0.224707
ENST00000618940	ENSG00000006125	AP2B1	0.011863	0.227316	2.91897	0.65686	0.926098	0.002048	0.747723	0.002048	0.004532
ENST00000370570	ENSG00000168216	LMBRD1	0	0	2.91543	0	0	0	0	0	0
ENST00000357650	ENSG00000162695	SLC30A7	0.392293	0.272894	2.89506	0.01539	0.033448	0.243892	0.172053	0.243892	0.001803
ENST00000543225	ENSG00000060339	CCAR1	0	0	2.87872	0	0	0	0	0	0.025411
ENST00000355947	ENSG00000146833	TRIM4	0.470642	0.68122	2.85715	0.336942	0.357182	0.213901	0.278399	0.213901	0.081371
ENST00000541600	ENSG00000116106	EPHA4	0.036394	0.005866	2.85548	0.008278	0.095718	0.048885	0.100237	0.048885	0.099974
ENST00000442805	ENSG00000125970	RALY	0.246362	0.566119	2.82817	0.557523	0.456904	0.295693	0.305255	0.295693	1.06052
ENST00000449570	ENSG00000114026	OGG1	0.473566	0.153103	2.76865	0	0.105609	0	0.116536	0	0.050908
ENST00000371399	ENSG00000058799	YIPF1	0	0	2.72261	0	0	0	0	0	0
ENST00000556504	ENSG00000140105	WARS	0.184526	0.250655	2.70349	0.213046	0.109651	0.298464	0.285009	0.298464	0.315401
ENST00000357710	ENSG00000080815	PSEN1	0.297781	0.217197	2.68457	0.259368	0.358894	0.284902	0.352416	0.284902	0.059614
ENST00000566074	ENSG00000074696	HACD3	0.091279	0.027416	2.54889	0.014218	0.009048	0.007678	0.017791	0.007678	0.009767
ENST00000393021	ENSG00000108443	RPS6KB1	0	0.150024	2.51268	0.745713	0	0.01225	0	0.01225	0
ENST00000558986	ENSG00000182718	ANXA2	0.048419	0	2.45006	1.3047	0	0	0	0	0.002424
ENST00000352634	ENSG00000171307	ZDHHC16	0.455611	0.461163	2.40398	0.254873	0.390142	0.225853	0.355721	0.225853	0.263256
ENST00000342456	ENSG00000006534	ALDH3B1	0.091298	0.024882	2.32999	0.002299	0.07086	0.064038	0.083894	0.064038	0.011157
ENST00000448981	ENSG00000110429	FBXO3	0.236622	0.285064	2.29611	0.154992	1.31156	0.207434	0.278033	0.207434	0.269913
ENST00000366669	ENSG00000135775	COG2	0.041951	0.357604	2.13633	0.164536	0.356529	0.401349	0.325215	0.401349	0.380078
ENST00000272559	ENSG00000144152	FBLN7	0.025338	0.002853	2.13299	0.004932	0.001986	0	0.169382	0	0.010258
ENST00000470503	ENSG00000005436	GCFC2	9.9e-05	0.008968	2.13024	0.001902	0.010656	0.000249	0.000606	0.000249	0.003038
ENST00000553117	ENSG00000164904	ALDH7A1	0	0	2.11245	0	0.237061	0.643077	0	0.643077	0
ENST00000373496	ENSG00000119487	MAPKAP1	0.229521	0.351889	2.04365	0.204302	0.234629	0.14721	0.144871	0.14721	0.260554
ENST00000394998	ENSG00000103496	STX4	0	0	2.03486	0.058588	0	0	0.103505	0	0.025962
ENST00000445771	ENSG00000075790	BCAP29	0.142084	0.192699	1.9922	0.914508	0.040806	0.120679	0.108359	0.120679	0.004151
ENST00000379188	ENSG00000005889	ZFX	0.16889	0.112103	1.98739	0.16114	0.193237	0.194391	0.160131	0.194391	0.13827
ENST00000417981	ENSG00000130159	ECSIT	0	0.02335	1.9562	0	1.37089	0.028241	0	0.028241	0
ENST00000465373	ENSG00000175110	MRPS22	0.040396	0.005106	1.9162	0.016213	0.018421	0.040052	0.013989	0.040052	0
ENST00000565255	ENSG00000140525	FANCI	0.094428	0.006349	1.89458	0.001318	0.006717	0.015009	0	0.015009	0.010723
ENST00000268124	ENSG00000140521	POLG	0.253958	0.18716	1.87654	0.003418	0.005972	0.022783	0.000804	0.022783	0.00131
ENST00000532544	ENSG00000085117	CD82	0.062125	0.260959	1.8712	0.170865	0.05757	0.155068	0.057795	0.155068	0.013408
ENST00000449045	ENSG00000131238	PPT1	0	0	1.86531	0	0	0.582028	0	0.582028	0
ENST00000234091	ENSG00000115738	ID2	0.077157	0.532843	1.78004	0.296257	0.23777	0.002624	0.08573	0.002624	0.038295
ENST00000645187	ENSG00000101266	CSNK2A1	1.26238	0.167416	1.77959	0.160279	0.039556	0.045945	0	0.045945	0
ENST00000554882	ENSG00000092148	HECTD1	0.124761	0.429959	1.72577	0.00461	0.015634	0.039773	0.002693	0.039773	0.007227
ENST00000470768	ENSG00000132780	NASP	0.178529	0.219436	1.71604	0.138571	0.46367	0.181287	0.149882	0.181287	0.60082
ENST00000429089	ENSG00000104368	PLAT	0.060985	0	1.69528	0	0.065585	0.14248	0.304209	0.14248	0.09072
ENST00000524300	ENSG00000040341	STAU2	0.229525	0.161718	1.68497	0.088934	0.090945	0.191932	0.109316	0.191932	0.103918
ENST00000399697	ENSG00000186184	POLR1D	0	0.433855	1.64387	0	0	1.5864	0	1.5864	0.000945
ENST00000621607	ENSG00000165806	CASP7	0.021746	0.294422	1.64381	0.374919	0.019613	0.011538	0.357934	0.011538	0.319277
ENST00000307658	ENSG00000186272	ZNF17	0.033248	0.002666	1.63962	0.002484	0.001602	0.001851	0.002726	0.001851	0.002283
ENST00000591864	ENSG00000092931	MFSD11	0.026688	0	1.62546	0	0.030454	0	0.090815	0	0.027163
ENST00000361733	ENSG00000198909	MAP3K3	0.39537	0.283285	1.61864	0.1571	0.225784	0.261576	0.25263	0.261576	0.209697
ENST00000403000	ENSG00000187954	CYHR1	0.002778	0.039528	1.60523	0.051957	0.662088	0.034703	0.127346	0.034703	0.160553
ENST00000342043	ENSG00000106785	TRIM14	0	0	1.55253	0	0	0	0	0	0.318184
ENST00000635751	ENSG00000182372	CLN8	0.003829	0.000556	1.51677	0	5.5e-05	0.004163	1e-06	0.004163	0
ENST00000446204	ENSG00000156931	VPS8	0	0	1.51217	0	0	0	0	0	0.835046
ENST00000566946	ENSG00000168488	ATXN2L	0.041885	0.031008	1.49514	0.027097	0.034034	0.032558	0	0.032558	0.744784
ENST00000619735	ENSG00000100109	TFIP11	0.024521	0.00183	1.35904	0.068657	0.14399	0.05911	0.003531	0.05911	0.038792
ENST00000584197	ENSG00000141552	ANAPC11	0	0	1.34322	0	0	0	1.00969	0	0
ENST00000424149	ENSG00000187954	CYHR1	0.01893	0.240222	1.33877	0.19422	0.446042	0.090479	0.175368	0.090479	0.234866
ENST00000412947	ENSG00000166526	ZNF3	0.123658	0.201684	1.22864	0.651355	0	0.041624	0.04859	0.041624	0
ENST00000526000	ENSG00000026508	CD44	0.02658	0	1.22828	0	0	0	0.051867	0	0
ENST00000367835	ENSG00000143147	GPR161	0	0	1.22116	0	0	0.314069	0	0.314069	0
ENST00000527155	ENSG00000066855	MTFR1	0	0	1.17783	0	0	0.076471	0	0.076471	0
ENST00000407755	ENSG00000128191	DGCR8	0	0	1.17297	0	0	0	0	0	0
ENST00000448607	ENSG00000149485	FADS1	0.014502	0.018824	1.16429	0.036099	0.071774	0.045084	0.05523	0.045084	0.049707
ENST00000317538	ENSG00000163867	ZMYM6	0.200316	0.093125	1.15	0.07	0.087857	0.083798	0.052549	0.083798	0.128463
ENST00000393313	ENSG00000048405	ZNF800	0	0	1.12596	0	0	0	0	0	0
ENST00000509127	ENSG00000171617	ENC1	0.030149	0.029663	1.12403	0.003421	0.007123	0.011375	0.007564	0.011375	0.005691
ENST00000543251	ENSG00000164338	UTP15	0	0.005862	1.09715	0.022487	0	0	0	0	0
ENST00000279147	ENSG00000149716	LTO1	0.063097	0.177517	1.08635	0.195849	0.018235	0.107014	0.061856	0.107014	0.061661
ENST00000557338	ENSG00000033170	FUT8	0.007528	0	1.06436	0	0	0.004346	0	0.004346	0
ENST00000535451	ENSG00000134333	LDHA	0.135079	0.133225	1.0482	0.074677	0.081053	0.19355	0	0.19355	0.37272
ENST00000529721	ENSG00000158555	GDPD5	0.037985	0.053236	1.02321	0.017735	0.314295	0.026482	0.033214	0.026482	0.038111
ENST00000591578	ENSG00000173581	CCDC106	0.138947	0.121247	1.02288	0.103917	0.143774	0.039811	0.122735	0.039811	0.095156
ENST00000367186	ENSG00000213079	SCAF8	0.004498	0.011726	1.01467	0.000926	0.002756	0.511198	0.000467	0.511198	0.004004
ENST00000356638	ENSG00000089597	GANAB	0	0	0.975368	0	0	0	0	0	0
ENST00000440166	ENSG00000136279	DBNL	0	0	0.96226	0	0.049746	0	0	0	0
ENST00000443449	ENSG00000239789	MRPS17	0	0	0.960369	0.008302	0.011907	0.03275	0.042146	0.03275	0.018184
ENST00000642454	ENSG00000136104	RNASEH2B	0.212723	0.097863	0.959419	0.086689	0.101877	0.10266	0.140607	0.10266	0.174268
ENST00000591601	ENSG00000099875	MKNK2	0.00184	0.009383	0.955406	0.006535	0.005668	0.005129	0.349865	0.005129	0.004758
ENST00000539419	ENSG00000149485	FADS1	0	0	0.932024	0.044587	0.098122	0.172127	0.109447	0.172127	0.050423
ENST00000619046	ENSG00000071553	ATP6AP1	0	0	0.92506	0	0	0.017254	0	0.017254	0
ENST00000378183	ENSG00000204977	TRIM13	0.024981	0.043258	0.921168	0.040136	0.112877	0	0	0	0.006453
ENST00000643072	ENSG00000165699	TSC1	0.132582	0.118221	0.907437	0	0	0	0	0	0
ENST00000512485	ENSG00000138767	CNOT6L	0.046413	0.040701	0.897446	0.025996	0.03855	0.068771	0.186551	0.068771	0.09488
ENST00000375066	ENSG00000095383	TBC1D2	0	0	0.874068	0	0	0	0	0	0
ENST00000265992	ENSG00000107443	CCNJ	0.283919	0.121118	0.872427	0	0.00055	0.01451	0	0.01451	0.00047
ENST00000461363	ENSG00000136270	TBRG4	0	0.085354	0.868235	0.083333	0	0.109332	0.130614	0.109332	0.11374
ENST00000360332	ENSG00000107643	MAPK8	0	0	0.861312	0	0	0	0	0	0
ENST00000394215	ENSG00000119522	DENND1A	0.05502	0.040731	0.850509	0.043239	0.076249	0.058961	0.064268	0.058961	0.050452
ENST00000260569	ENSG00000011523	CEP68	0	0	0.824045	0.403845	0	0	0	0	0
ENST00000434713	ENSG00000118007	STAG1	0.194898	0	0.812127	0.067995	0.011678	0.078854	0.084571	0.078854	0.185629
ENST00000512894	ENSG00000182923	CEP63	0.039024	0.146577	0.797064	0.038151	0.026187	0.011212	0.024649	0.011212	0.047674
ENST00000396761	ENSG00000198925	ATG9A	0.104038	0.090961	0.782691	0.046868	0.122368	0.215774	0.143015	0.215774	0.121278
ENST00000574708	ENSG00000134824	FADS2	0	0	0.766385	0	0	0.387474	0	0.387474	0.213394
ENST00000513206	ENSG00000038382	TRIO	0.001478	0.001167	0.747596	0.000895	0	0	0	0	0.000901
ENST00000415021	ENSG00000151090	THRB	0.023139	0.033363	0.724735	0.219848	0.034996	0.020981	0.021342	0.020981	0.019041
ENST00000519980	ENSG00000123908	AGO2	0	0	0.713095	0	0	0	0	0	0
ENST00000485682	ENSG00000184281	TSSC4	0	0.158659	0.705666	0.182516	0	0.108766	0	0.108766	0
ENST00000409633	ENSG00000184182	UBE2F	0.047036	0.068763	0.673039	0.031726	0	0.067305	0.018693	0.067305	0.079487
ENST00000540306	ENSG00000067596	DHX8	0.000717	0.076433	0.669411	0.022117	0.018435	0.025048	0.015085	0.025048	0.148888
ENST00000339497	ENSG00000108100	CCNY	0.139064	0	0.667056	0	0.05274	0.015535	0	0.015535	0.184111
ENST00000398119	ENSG00000102786	INTS6	0.000179	0.011642	0.663189	0.032778	0.012152	0.016818	0	0.016818	0.034798
ENST00000409993	ENSG00000172269	DPAGT1	0	0.022375	0.650641	0.02378	0.015615	9.1e-05	0	9.1e-05	0.006462
ENST00000522212	ENSG00000259024	TVP23C-CDRT4	0	0	0.638731	0	0	0	0	0	0
ENST00000517532	ENSG00000156831	NSMCE2	0.11996	0.019563	0.637921	0.018936	0.003735	0.076168	0.006488	0.076168	0.007408
ENST00000354312	ENSG00000152942	RAD17	1e-06	0.025933	0.637434	0	1e-06	0	0	0	0.004962
ENST00000438383	ENSG00000221838	AP4M1	0	0	0.631456	0	0.189638	0	0.143582	0	0
ENST00000393262	ENSG00000179941	BBS10	0.002683	0.002005	0.630739	0.001413	0.001566	0.002401	0.003014	0.002401	0.001189
ENST00000446165	ENSG00000173875	ZNF791	0	0	0.62716	0	0	0	0	0	0
ENST00000522864	ENSG00000153140	CETN3	0	0	0.626738	0	0	0	0	0	0
ENST00000367883	ENSG00000143198	MGST3	0.011349	1e-06	0.626595	0.001992	0.000392	0.019719	0.120819	0.019719	0.00344
ENST00000360274	ENSG00000188191	PRKAR1B	0	0	0.623125	0	0	0.001823	0	0.001823	0
ENST00000413368	ENSG00000164850	GPER1	0.15243	0.074468	0.623021	0.149921	0.122718	0	0.016428	0	0
ENST00000373696	ENSG00000147174	GCNA	0	0.02851	0.616299	0	0.426221	0	0.167644	0	0
ENST00000614778	ENSG00000249915	PDCD6	0	0	0.605896	0	0	0	0	0	0
ENST00000463937	ENSG00000114786	ABHD14A-ACY1	0.202538	0	0.598914	0	0	0	0	0	0
ENST00000580716	ENSG00000169727	GPS1	0.05682	0.064081	0.597695	0.055008	0.157946	0.149407	0.136539	0.149407	0.045368
ENST00000373603	ENSG00000119408	NEK6	0.013852	0.002431	0.589712	0.170828	0.079975	0	0	0	0.07974
ENST00000621345	ENSG00000165806	CASP7	0.034078	0.094628	0.564082	0.12662	0.037374	0.01077	0.134061	0.01077	0.072882
ENST00000396026	ENSG00000125846	ZNF133	0.056792	0.061096	0.55177	0.039302	0.039318	0.099343	0.069761	0.099343	0.074738
ENST00000455267	ENSG00000122483	CCDC18	0.113964	0.090964	0.551506	0	0.090306	0.066535	0.10653	0.066535	0
ENST00000578237	ENSG00000221926	TRIM16	0	0	0.549328	0.137446	0	0.102943	0	0.102943	0
ENST00000562470	ENSG00000103275	UBE2I	0.033806	0.033836	0.548857	0.029694	0.033414	0.028109	0.035045	0.028109	0.052717
ENST00000651391	ENSG00000152611	CAPSL	0	0	0.539373	0	0	0	0	0	0
ENST00000396268	ENSG00000204536	CCHCR1	0	0	0.527804	0	0	0	0	0	0
ENST00000526314	ENSG00000140521	POLG	0	0	0.527314	0	0.125706	0	0	0	0
ENST00000429774	ENSG00000066427	ATXN3	0	0	0.526521	0.091754	0	0	0	0	0
ENST00000357440	ENSG00000174669	SLC29A2	0.000344	0.000195	0.518746	0.01035	0.00021	0.000418	0.000287	0.000418	0.000243
ENST00000356577	ENSG00000159140	SON	0.001379	0.003343	0.51552	0.007698	0.037932	0.034305	0.001589	0.034305	0
ENST00000370730	ENSG00000117114	ADGRL2	0	0	0.511147	0	0	0	0	0	0
ENST00000475361	ENSG00000156500	FAM122C	0	0.033114	0.510261	0.022333	0.030275	0.126752	0.013366	0.126752	0.013151
ENST00000650436	ENSG00000166734	CASC4	0.17129	0.016476	0.509515	0	0	0	0	0	0.025788
ENST00000647779	ENSG00000285815	WRB-SH3BGR	0	0	0.498983	0.127648	0.004795	0	0.02801	0	0.10209
ENST00000589772	ENSG00000173786	CNP	0.073675	0.013822	0.494962	0.04471	0.037413	0.04106	0.090816	0.04106	0.008564
ENST00000650450	ENSG00000118655	DCLRE1B	0.148576	0.000123	0.49486	0.020653	0.000354	0.001644	0.006711	0.001644	0.001349
ENST00000264501	ENSG00000138688	KIAA1109	0	0	0.494605	0.030353	0.181895	0	0	0	0
ENST00000409667	ENSG00000144152	FBLN7	0	0	0.49341	0	0	0	0	0	0
ENST00000649442	ENSG00000156650	KAT6B	0.027496	0.001112	0.48924	0.020593	0.014839	0.062087	0.045345	0.062087	0.030827
ENST00000360019	ENSG00000188603	CLN3	0	0	0.483316	0.005582	0	0	0	0	0
ENST00000510993	ENSG00000145425	RPS3A	0.074503	0	0.4821	0.057924	0.181333	0.161459	0	0.161459	0
ENST00000505596	ENSG00000114019	AMOTL2	0	0.063007	0.478443	0	0.039437	0.063987	0.058323	0.063987	0.052452
ENST00000588571	ENSG00000197563	PIGN	0	0	0.475775	0.070951	0.058019	0	0	0	0.090736
ENST00000393034	ENSG00000158234	FAIM	0	0.03248	0.473957	0	0.115855	0	0	0	0
ENST00000552871	ENSG00000110880	CORO1C	0	0	0.459976	0.201039	0	0	0	0	0
ENST00000413976	ENSG00000135926	TMBIM1	0	0.034495	0.458233	0.011542	0.217761	0.015757	0	0.015757	0
ENST00000361242	ENSG00000198925	ATG9A	0.008257	0.00776	0.454123	0.005938	0.012506	0.002124	0.004219	0.002124	0.00503
ENST00000612294	ENSG00000196704	AMZ2	0	0	0.449332	0	0	0.276763	0.083114	0.276763	0.034559
ENST00000336625	ENSG00000010704	HFE	0	0	0.446972	0	0	0	0	0	0
ENST00000552688	ENSG00000062485	CS	0	0	0.446945	0	0	0	0	0	0
ENST00000560496	ENSG00000131876	SNRPA1	0	0	0.445274	0.084062	0.034938	0	0	0	0
ENST00000646892	ENSG00000180488	MIGA1	0.158633	0.004509	0.440308	0.007556	0.090743	0.222785	0.009481	0.222785	0.01063
ENST00000393446	ENSG00000004866	ST7	0	0	0.434048	0	0	0	0	0	0
ENST00000394697	ENSG00000121281	ADCY7	0.005206	0.0003	0.430902	0	0.013544	0.05358	0.036779	0.05358	0.00026
ENST00000577538	ENSG00000215421	ZNF407	0.098585	0.054622	0.417038	0.024439	0.150194	0.046407	0.06485	0.046407	0.022386
ENST00000565497	ENSG00000102879	CORO1A	0	0	0.413138	0	0	0	0	0	0
ENST00000347300	ENSG00000163913	IFT122	0.029784	0.073203	0.403523	0.043654	0.055852	0.08224	0.040041	0.08224	0.066384
ENST00000467579	ENSG00000213366	GSTM2	0	0	0.384169	0	0	0	0	0	0
ENST00000620123	ENSG00000204267	TAP2	0.011718	0.049702	0.374754	0.054834	0.00421	0.002954	0.002479	0.002954	0.009365
ENST00000262963	ENSG00000105426	PTPRS	0	0.000452	0.370977	0.0054	0.000143	0.000868	0.018024	0.000868	0.043307
ENST00000416681	ENSG00000183696	UPP1	0.143063	0	0.366512	0	0	0	0	0	0.10198
ENST00000346806	ENSG00000116761	CTH	0	0	0.353331	0	0	0	0.22527	0	0
ENST00000640533	ENSG00000109911	ELP4	0.058617	0.000895	0.351836	0.000266	0.063576	0.000164	0.134779	0.000164	0.029951
ENST00000454190	ENSG00000163701	IL17RE	0.015838	0.021586	0.345296	0.023806	0	0	0.013807	0	0.156557
ENST00000377885	ENSG00000137075	RNF38	0	0	0.343825	0	0	0	0	0	0.045028
ENST00000555634	ENSG00000182199	SHMT2	0	0	0.338134	0	0	0	0	0	0.056289
ENST00000619023	ENSG00000127914	AKAP9	0.061384	0.056081	0.330281	0.055653	0.028954	0.014508	0.030951	0.014508	0.107795
ENST00000259119	ENSG00000136603	SKIL	0	0.023864	0.325867	0.015305	0.003876	0.103465	0.005454	0.103465	0.156916
ENST00000601645	ENSG00000099783	HNRNPM	0.069416	0.004481	0.32363	0.010555	0.027126	0	0	0	0
ENST00000457056	ENSG00000198908	BHLHB9	0	0	0.322065	3.5e-05	0.005984	0	0	0	0
ENST00000638353	ENSG00000124155	PIGT	0.08752	0.088938	0.321394	0	0	0.051922	0	0.051922	0
ENST00000615993	ENSG00000114354	TFG	0	0	0.317436	0	0	0.131105	0.159291	0.131105	0
ENST00000618486	ENSG00000090006	LTBP4	0.05911	0.015668	0.314267	0.029519	0.024823	0.045092	0.020766	0.045092	0
ENST00000618425	ENSG00000140987	ZSCAN32	0.001046	0.126178	0.31417	0.001218	0.02457	0.05181	0.002322	0.05181	0.000951
ENST00000537427	ENSG00000006757	PNPLA4	0	0	0.312861	0	0	0	0	0	0
ENST00000311565	ENSG00000112033	PPARD	0	0	0.312641	0	0	0	0	0	0
ENST00000565637	ENSG00000157429	ZNF19	0	0	0.311207	0	0	0.094954	0	0.094954	0
ENST00000366987	ENSG00000162772	ATF3	0	0	0.310601	0	0	0.103956	0.022769	0.103956	0
ENST00000464364	ENSG00000244038	DDOST	0	0	0.309218	0	0	0.263808	0	0.263808	0
ENST00000593397	ENSG00000269858	EGLN2	0	0	0.307858	0	0	0	0	0	0
ENST00000433803	ENSG00000110047	EHD1	0	0	0.306432	0	0	0	0	0	0
ENST00000442379	ENSG00000241878	PISD	0.114205	0.009602	0.304985	0.017318	0.061734	0.009435	0.040313	0.009435	0.00688
ENST00000508453	ENSG00000155016	CYP2U1	0.030526	0	0.302883	0.017633	0.002273	0.043018	0.001882	0.043018	0.002811
ENST00000359139	ENSG00000100239	PPP6R2	0.022013	0	0.294984	0.045504	0	0	0.011659	0	0.030209
ENST00000438886	ENSG00000100823	APEX1	0.06686	0	0.289805	0	0	0	0.070061	0	0
ENST00000431679	ENSG00000244219	TMEM225B	0	0	0.287465	0	0	0	0	0	0.077581
ENST00000382754	ENSG00000150456	EEF1AKMT1	0.062258	0.054079	0.287368	0.046226	0.00509	0.013425	0	0.013425	0.019067
ENST00000537321	ENSG00000137094	DNAJB5	0.055008	0.05095	0.285376	0.088883	0	0.018983	0.021605	0.018983	0
ENST00000553585	ENSG00000080824	HSP90AA1	0	0	0.28363	0	0	0	0	0	0
ENST00000560905	ENSG00000137824	RMDN3	0.041488	0.002796	0.273325	1e-06	0.004001	0.005028	0.002438	0.005028	1e-06
ENST00000417752	ENSG00000116750	UCHL5	0	0	0.270735	0	0	0	0.108215	0	0
ENST00000358825	ENSG00000170325	PRDM10	0.000579	0.000256	0.268029	0.000238	0.000302	0	4.1e-05	0	0.000185
ENST00000397299	ENSG00000243789	JMJD7	0.056967	0.042112	0.264761	0.014107	0.017482	0.027512	0.020628	0.027512	0.001482
ENST00000524631	ENSG00000185946	RNPC3	0.012707	0.039176	0.263281	0.01732	0.000573	0.017763	0.039218	0.017763	0.033885
ENST00000344937	ENSG00000114859	CLCN2	0	0	0.262805	0	0.053705	0	0	0	0
ENST00000482824	ENSG00000169814	BTD	0	0	0.261828	0	0	0	0	0	0
ENST00000517858	ENSG00000205133	TRIQK	0.000454	0.000515	0.261494	0.004033	0.001326	0.001564	0.000861	0.001564	0.000757
ENST00000618334	ENSG00000141428	C18orf21	0	0	0.260882	0	0	0	0	0	0
ENST00000593678	ENSG00000125651	GTF2F1	0	0	0.258992	0	0	0	0	0	0.143664
ENST00000625377	ENSG00000196275	GTF2IRD2	0	0	0.257484	0	0	0	0	0	0
ENST00000396127	ENSG00000122507	BBS9	0	0	0.257275	0	0	0	0	0	0
ENST00000434015	ENSG00000135926	TMBIM1	0	0	0.257011	0.139953	0	0	0	0	0
ENST00000639913	ENSG00000156113	KCNMA1	0.000532	0.018296	0.252532	0	0	0.001278	0.006324	0.001278	0.007414
ENST00000641272	ENSG00000092621	PHGDH	0	0	0.251485	0.059321	0	0	0	0	0
ENST00000382824	ENSG00000147364	FBXO25	0.006267	0.052172	0.248584	0.000279	0.00051	0.000216	0.001026	0.000216	0.001185
ENST00000357977	ENSG00000162599	NFIA	0.036898	0.021908	0.247901	0	0	0.067322	0.034551	0.067322	0.030277
ENST00000438268	ENSG00000131732	ZCCHC9	0.000931	0.029678	0.24551	0.020315	0.065381	0.018591	0.026537	0.018591	0.014919
ENST00000594155	ENSG00000105402	NAPA	0.14717	0	0.245014	0	0	0	0	0	0
ENST00000455532	ENSG00000089123	TASP1	0	0	0.239607	0	0	0	0	0	0
ENST00000613139	ENSG00000167182	SP2	0.02328	0	0.235851	0.002575	0.025011	0.00867	0	0.00867	0
ENST00000484087	ENSG00000012048	BRCA1	0.085757	0.026963	0.233931	0.016508	0.043694	0.036744	0.037152	0.036744	0.025126
ENST00000475412	ENSG00000255154	HTD2	0	0	0.232944	0	0.037576	0.080431	0	0.080431	0
ENST00000592342	ENSG00000130816	DNMT1	0.009785	0.075303	0.231381	0.025191	0	0	0	0	0.053915
ENST00000587072	ENSG00000105607	GCDH	0	0	0.229078	0	0	0.135934	0	0.135934	0
ENST00000395936	ENSG00000109099	PMP22	0.006367	0.035399	0.225217	0	0.000942	0.013823	0.04365	0.013823	0
ENST00000526085	ENSG00000149809	TM7SF2	0	0	0.223948	0	0.043727	0	0	0	0.084616
ENST00000539068	ENSG00000096060	FKBP5	0.003444	0.002187	0.223216	0.005938	0.001351	0.007476	0.00229	0.007476	0.007914
ENST00000563649	ENSG00000103544	VPS35L	0	0	0.221874	0.068081	0	0	0	0	0.012541
ENST00000401470	ENSG00000196422	PPP1R26	0.000286	0.007136	0.217916	0.092599	1e-05	0.007125	0.002313	0.007125	0.000302
ENST00000645725	ENSG00000127990	SGCE	0.026057	0	0.215472	0	0	0.031592	0.06161	0.031592	0.024791
ENST00000378240	ENSG00000197889	MEIG1	0	0.01931	0.212779	0.014712	0.001374	0.010905	0.05699	0.010905	0.028412
ENST00000565925	ENSG00000103121	CMC2	0.059346	0.021475	0.212575	0.01024	0.01986	0.100726	0	0.100726	0.013857
ENST00000588119	ENSG00000186812	ZNF397	0	0	0.210523	0	0.069772	0	0.062106	0	0.097551
ENST00000650821	ENSG00000118777	ABCG2	0.00036	0	0.209528	0	0	0.000359	0.001935	0.000359	0
ENST00000558196	ENSG00000140612	SEC11A	0.018288	0	0.207015	0.000619	0	0.052909	0.015045	0.052909	0
ENST00000652273	ENSG00000160953	PWWP3A	0	0.061093	0.206435	0.025926	0.001596	0	0	0	0
ENST00000552882	ENSG00000185664	PMEL	0	0	0.206262	0	0	0	0	0	0.003978
ENST00000394159	ENSG00000164136	IL15	0.000472	1.5e-05	0.203823	4e-06	1.8e-05	0.014467	0.038919	0.014467	0.028707
ENST00000506889	ENSG00000131446	MGAT1	0.000761	0.001175	0.200691	0.097484	0.000125	0.000216	0.000478	0.000216	0.000218
ENST00000585567	ENSG00000161888	SPC24	0	0	0.199067	0	0	0	0	0	0
ENST00000576145	ENSG00000102967	DHODH	0.006504	0.033207	0.198426	0.054059	0.066142	0	0	0	0.008547
ENST00000505154	ENSG00000061918	GUCY1B1	0	0	0.195888	0	0	0	0	0	0
ENST00000448430	ENSG00000256061	DNAAF4	0	0	0.194896	0.025515	0.12663	0	0	0	0
ENST00000360442	ENSG00000130669	PAK4	0.003135	0	0.193401	0	0	0	0.009658	0	0
ENST00000392095	ENSG00000130023	ERMARD	0	0	0.192069	0	0	0	0	0	0
ENST00000547306	ENSG00000181929	PRKAG1	0	0.031779	0.190896	0.002378	0.055429	0	0.041332	0	0.019192
ENST00000409447	ENSG00000213999	MEF2B	0.02382	0.025879	0.187953	0	0.034441	0.0794	0.051449	0.0794	8.9e-05
ENST00000478640	ENSG00000163468	CCT3	0.061231	0	0.187615	0	0	0.035549	0	0.035549	0.033797
ENST00000507959	ENSG00000089335	ZNF302	0.001815	0	0.186424	0	0.007918	0.040181	0	0.040181	0.000464
ENST00000454369	ENSG00000213658	LAT	0	0	0.185974	0	0	0	0	0	0.075948
ENST00000549123	ENSG00000204852	TCTN1	0.039723	0.035494	0.185893	0.068323	0	0	0	0	0
ENST00000553918	ENSG00000100600	LGMN	0	0.029707	0.183847	0.017031	0	0.076592	0.021303	0.076592	0.029095
ENST00000586548	ENSG00000099622	CIRBP	0	0	0.180944	0	0	0	0.009956	0	0.001887
ENST00000447788	ENSG00000126970	ZC4H2	0.002356	0.005979	0.180829	0	0.000678	0.003766	0.004637	0.003766	0
ENST00000442713	ENSG00000141627	DYM	0.101182	0	0.180784	0	0	0	0	0	0
ENST00000649271	ENSG00000005302	MSL3	0	0	0.177502	0	0	0	0	0	0
ENST00000420626	ENSG00000185252	ZNF74	0	0	0.173358	0	0.104577	0	0	0	0
ENST00000564567	ENSG00000103196	CRISPLD2	0.00065	0.00869	0.172946	0.043019	0.029435	0.002687	0.00293	0.002687	0.000407
ENST00000487763	ENSG00000095794	CREM	0.009116	0.00313	0.171708	0.052682	0.003301	0.002285	0.025342	0.002285	0.015359
ENST00000418178	ENSG00000112139	MDGA1	0.059436	0.039732	0.170862	0	0	0	0.031364	0	0
ENST00000559577	ENSG00000140471	LINS1	0	0	0.170603	0	0	0.000821	0.008922	0.000821	0
ENST00000369636	ENSG00000155366	RHOC	0	0	0.170335	0	0	0	0	0	0
ENST00000410101	ENSG00000144354	CDCA7	0	0	0.1686	0	0.036254	0	0	0	0
ENST00000564153	ENSG00000092531	SNAP23	0	0	0.1646	0	0	0	0	0	0
ENST00000627305	ENSG00000155368	DBI	0.030033	0	0.164562	0	0.057713	0	0	0	0
ENST00000590439	ENSG00000105705	AC004475.1	0	0	0.164487	0.071067	0	0	0	0	0
ENST00000644285	ENSG00000167522	ANKRD11	0.081595	0	0.164032	0	0	0	0	0	0
ENST00000506761	ENSG00000109466	KLHL2	0.00307	0.007425	0.163716	0.00194	0.000652	0.005942	0.000216	0.005942	0
ENST00000361534	ENSG00000205758	CRYZL1	0.034878	0	0.163561	7e-06	0.027483	0	0.002123	0	0.042268
ENST00000545896	ENSG00000149781	FERMT3	0	0	0.161804	0	0	0	0	0	0
ENST00000636176	ENSG00000196421	C20orf204	0.048051	0	0.161277	0	0	0	0.009851	0	0.01712
ENST00000368838	ENSG00000143376	SNX27	0	0	0.159797	0	0	0.162671	0	0.162671	0
ENST00000549875	ENSG00000089022	MAPKAPK5	0.102446	0	0.157298	0	0	0	0	0	0.076303
ENST00000393824	ENSG00000257923	CUX1	0	0	0.156698	0	0	0	0	0	0
ENST00000548894	ENSG00000139644	TMBIM6	0.020546	0	0.154959	0	0	0	0.028823	0	0.048123
ENST00000529734	ENSG00000135365	PHF21A	0	0	0.154477	0	0	0	0	0	0.053532
ENST00000576010	ENSG00000174238	PITPNA	0	0.039348	0.153067	0	0.050948	0	0.00936	0	0
ENST00000556565	ENSG00000258947	TUBB3	0	0	0.152133	0	0	0	0	0	0
ENST00000580235	ENSG00000169660	HEXD	0	0	0.152025	0.02323	0	0.116147	0	0.116147	0
ENST00000401647	ENSG00000175600	SUGCT	0.082683	0	0.150099	0	0	0.017285	0	0.017285	0
ENST00000325589	ENSG00000152061	RABGAP1L	0	0	0.149691	0	0	0	0	0	0
ENST00000585941	ENSG00000005156	LIG3	0	0	0.148876	0	0	0	0	0	0
ENST00000582575	ENSG00000242220	TCP10L	0	0	0.148616	0.004277	0	0	0	0	0
ENST00000531214	ENSG00000177542	SLC25A22	0	0	0.147623	0	0	0.081865	0	0.081865	0.052335
ENST00000566739	ENSG00000169018	FEM1B	0.009011	0.0152	0.146454	0.00661	0.006465	0.101518	0.010123	0.101518	0.004268
ENST00000503324	ENSG00000170365	SMAD1	0.003332	0	0.14507	0	0.070681	0	0	0	0
ENST00000419569	ENSG00000244005	NFS1	0	0	0.144563	0	0	0	0	0	0.055189
TCONS_00342298	XLOC_136999	XLOC_136999	0	0	0.144472	0	0	0	0	0	0
ENST00000645034	ENSG00000126091	ST3GAL3	0	0	0.142978	0.011063	0.009381	0.064781	0.017251	0.064781	0
ENST00000359875	ENSG00000197568	HHLA3	0.012323	0.037005	0.139866	0.026154	0.008391	0.009003	0.000496	0.009003	0.049908
ENST00000615392	ENSG00000164117	FBXO8	0	0	0.139552	0	0.014826	0	0	0	0
ENST00000294947	ENSG00000239605	STPG4	0	0	0.139371	0	0	0.006709	0	0.006709	0
ENST00000416292	ENSG00000184182	UBE2F	0	2e-06	0.138691	0.000138	0	3.6e-05	0.000151	3.6e-05	9.3e-05
ENST00000645935	ENSG00000099949	LZTR1	0	0	0.138231	0	0	0	0	0	0
ENST00000626657	ENSG00000280670	CCDC163	0.026399	0.032456	0.138016	0	0	0	0.045954	0	0
ENST00000358704	ENSG00000179456	ZBTB18	0.01053	1.6e-05	0.135974	0.002488	0.009317	0.096653	0.001685	0.096653	0.002065
ENST00000562072	ENSG00000140265	ZSCAN29	0.071404	0	0.134165	0	0	0	0	0	0
ENST00000588993	ENSG00000254004	ZNF260	0.001919	0.001637	0.133522	0.002712	0.021304	0.002321	0.000344	0.002321	0.015021
ENST00000396052	ENSG00000102897	LYRM1	0.032366	0.005638	0.133339	0.001766	0.002262	0.001282	0.014383	0.001282	0.017025
ENST00000614862	ENSG00000205683	DPF3	0.006715	0.003135	0.131225	0.021508	0	0.023306	0.000335	0.023306	0.001221
ENST00000645695	ENSG00000181392	SYNE4	0	0	0.130665	0	0	0	0	0	0
ENST00000438224	ENSG00000122557	HERPUD2	0.001975	0.001035	0.129445	0.021093	0.000481	0.090851	0.001162	0.090851	0.001038
ENST00000435004	ENSG00000115966	ATF2	0.032309	0	0.129285	0	0.022853	0.083478	0	0.083478	0
ENST00000368019	ENSG00000158773	USF1	0	0	0.12893	0	0	0	0	0	0
ENST00000176195	ENSG00000070031	SCT	0	0	0.127076	0.018508	0.035075	0	0	0	0
ENST00000395248	ENSG00000285043	AC093512.2	0.005053	0.004967	0.127006	0.0016	0	0.129545	0	0.129545	0.001618
ENST00000421706	ENSG00000131503	ANKHD1	0.011661	0.01174	0.126823	0.000468	0.072629	0.001174	0.011322	0.001174	0.002585
ENST00000361243	ENSG00000170776	AKAP13	0	0.000244	0.12659	0	0	0.006288	0	0.006288	0
ENST00000464320	ENSG00000120756	PLS1	0	9e-05	0.125775	0	0.016893	0.027751	0.080597	0.027751	0.000192
ENST00000393930	ENSG00000173801	JUP	0	0.00165	0.124235	0.020524	0.075583	0	0	0	0
ENST00000413728	ENSG00000163947	ARHGEF3	0	0	0.124171	0	0	0	0	0	0.000292
ENST00000574405	ENSG00000149927	DOC2A	0	0.024445	0.123093	0.011283	0.002801	0	0.009591	0	0.031182
ENST00000593447	ENSG00000011422	PLAUR	0.011629	0.01181	0.122428	0.018516	0.018422	0.011015	0.017835	0.011015	0.015451
ENST00000511831	ENSG00000137207	YIPF3	0	0	0.122132	0.019222	0	0	0.02587	0	0
ENST00000521144	ENSG00000164951	PDP1	0.026059	0.011	0.121609	0.006221	0.006098	0.010585	0	0.010585	0.013614
ENST00000562880	ENSG00000128881	TTBK2	0.005451	0.035768	0.121357	0.007139	0	0.010242	0	0.010242	0.012262
ENST00000370447	ENSG00000162664	ZNF326	0	0	0.120707	0	0	0	0	0	0
ENST00000579733	ENSG00000109046	WSB1	6e-06	0	0.118088	2.6e-05	0.000939	0.000219	0.004611	0.000219	0
ENST00000420362	ENSG00000022267	FHL1	0	0	0.117621	0	0	0.023621	0	0.023621	0.035747
ENST00000530638	ENSG00000167792	NDUFV1	0.042523	0	0.116819	0	0	0	0	0	0
ENST00000651801	ENSG00000169255	B3GALNT1	0	0	0.116546	0	0	0.001705	0.014042	0.001705	0
ENST00000553059	ENSG00000074527	NTN4	0.049626	0	0.116027	0	0	0	0	0	0
ENST00000475893	ENSG00000136270	TBRG4	0	0	0.114722	0	0	0	0	0	0
ENST00000369054	ENSG00000143374	TARS2	0.057217	0	0.114489	0	0	0	0	0	0
ENST00000534044	ENSG00000118513	MYB	0	0	0.11354	0	0	0	0	0	0
ENST00000616825	ENSG00000204842	ATXN2	0	0	0.112116	0	0	0	0.016437	0	0
ENST00000575322	ENSG00000121057	AKAP1	0	0	0.110645	0	0.026736	0.010426	0	0.010426	0
ENST00000368002	ENSG00000143258	USP21	0	0	0.110177	0	0	0	0	0	0
ENST00000565335	ENSG00000138629	UBL7	0	0	0.109016	0	0	0	0	0	0
ENST00000426047	ENSG00000127586	CHTF18	0	0	0.106774	0	0	0	0	0	0
ENST00000307301	ENSG00000154719	MRPL39	0	0	0.10626	0	0	0	0	0	0.019472
ENST00000559099	ENSG00000140382	HMG20A	0	0.012303	0.105438	0.023386	0.013867	0.012077	0.022693	0.012077	0.021653
ENST00000467909	ENSG00000143036	SLC44A3	0	0	0.104305	0	0	0	0	0	0
ENST00000473663	ENSG00000198736	MSRB1	0	0	0.10376	0	0	0.004869	0	0.004869	0
ENST00000626660	ENSG00000161011	SQSTM1	0	0	0.103308	0	0	0.007031	0	0.007031	0.014269
ENST00000357505	ENSG00000244754	N4BP2L2	0	0	0.102661	0	0	0.030562	0.02864	0.030562	0.020637
ENST00000554890	ENSG00000126777	KTN1	0	0.023371	0.102261	0	0	0.043369	0.031801	0.043369	0
ENST00000583599	ENSG00000108439	PNPO	0.001386	0	0.102056	0.002541	0	0	0	0	0.071442
ENST00000296877	ENSG00000164406	LEAP2	0	0	0.101385	0.021487	0	0.026251	0	0.026251	0
ENST00000491846	ENSG00000117407	ARTN	0.003904	0.00131	0.101094	0.000969	0.023064	0	0.055635	0	0.000626
ENST00000569714	ENSG00000179580	RNF151	0	0	0.100231	0.008569	0	0	0	0	0
ENST00000355973	ENSG00000204681	GABBR1	0.01254	0.015834	0.099144	0	0.053232	0	0	0	0
ENST00000581264	ENSG00000171962	DRC3	0	0	0.097869	0	0	0.054433	0	0.054433	0
ENST00000522402	ENSG00000157168	NRG1	0.004912	0.006645	0.096291	0.004508	0.000684	0.002845	0.013916	0.002845	0.012332
ENST00000429683	ENSG00000241878	PISD	0.011294	0	0.095783	0.003496	0.013427	0.012797	0.02101	0.012797	0.005876
ENST00000430331	ENSG00000112983	BRD8	0.021952	0.005496	0.094977	0	0	0.014078	0.030745	0.014078	0.011082
ENST00000553975	ENSG00000011114	BTBD7	0	0	0.094758	0	0	0	0.064425	0	0
ENST00000261789	ENSG00000100926	TM9SF1	0.019366	0.007946	0.094014	0.002538	0.006061	0.002734	0.010399	0.002734	0.003047
ENST00000447157	ENSG00000163516	ANKZF1	0.01767	0	0.093051	0	0	0	0	0	0.02476
ENST00000495645	ENSG00000033100	CHPF2	0	0	0.092785	0	0	0	0	0	0.001279
ENST00000521641	ENSG00000188343	FAM92A	0	0	0.091749	0	0	0	0	0	0
ENST00000460283	ENSG00000137171	KLC4	0	0	0.091389	0	0	0	0	0	0
ENST00000587334	ENSG00000167642	SPINT2	0	0	0.091257	0	0	0	0	0	0
ENST00000437390	ENSG00000198203	SULT1C2	0	0	0.090348	0	0	0	0	0	0.015989
ENST00000617926	ENSG00000070371	CLTCL1	0	0	0.090202	0	0	0.092774	0	0.092774	0
ENST00000409214	ENSG00000121964	GTDC1	0	0	0.090179	0	0	0.022388	0.002435	0.022388	0.002542
ENST00000458535	ENSG00000170293	CMTM8	0.051789	0	0.089209	0	0	0.002801	0	0.002801	0.038362
ENST00000454035	ENSG00000014641	MDH1	0	0	0.088848	0.009984	0	0	0	0	0
ENST00000409263	ENSG00000137478	FCHSD2	0	0	0.088802	0	0	0	0	0	0
ENST00000402849	ENSG00000100028	SNRPD3	0	0	0.088277	0	0	0	0	0	0
ENST00000454859	ENSG00000093144	ECHDC1	0	0.018729	0.087664	0.007361	0.000194	0.018519	0.000733	0.018519	0.030568
ENST00000344086	ENSG00000160712	IL6R	0.00027	0	0.086949	0	0	0	0	0	0
ENST00000496897	ENSG00000058056	USP13	0	0.002494	0.086949	0.000504	0.000649	0.001803	0.001092	0.001803	0
ENST00000494393	ENSG00000111801	BTN3A3	0.001097	9.6e-05	0.08679	0	0	4.1e-05	0.032757	4.1e-05	0.043394
ENST00000433559	ENSG00000177303	CASKIN2	0.00556	0.002227	0.086744	0.000984	0.009496	0.001437	0	0.001437	0
ENST00000648237	ENSG00000242802	AP5Z1	0	0	0.085135	0	0	0.019263	0	0.019263	0
ENST00000392551	ENSG00000163328	GPR155	0.007632	0.009866	0.084881	0.004289	0.000723	0.000411	0.000345	0.000411	0.000332
ENST00000543663	ENSG00000130640	TUBGCP2	0.002549	0	0.083941	0	0.002958	0.0022	0.001022	0.0022	0
ENST00000400305	ENSG00000183570	PCBP3	0	0	0.083445	0	0	0	0.031383	0	0
ENST00000458046	ENSG00000054654	SYNE2	0.025063	0	0.08336	0	0	0	0	0	0.071903
ENST00000330891	ENSG00000127325	BEST3	0.012907	0	0.082935	0	0	0	0	0	0
ENST00000373559	ENSG00000147099	HDAC8	0.035944	0	0.082826	0	0	0.033744	0	0.033744	0
ENST00000548830	ENSG00000116539	ASH1L	0.004215	0	0.082605	0	0.005618	0.007041	0	0.007041	0.007408
ENST00000522603	ENSG00000198363	ASPH	0	0	0.082599	0	0	0	0	0	0
ENST00000263545	ENSG00000146963	LUC7L2	0	0	0.081712	0	0	0	0	0	0
ENST00000406652	ENSG00000057935	MTA3	0	0	0.081377	0	0	0	0.002484	0	0
ENST00000574107	ENSG00000185298	CCDC137	0	0	0.081299	0	0	0	0	0	0
ENST00000540056	ENSG00000008394	MGST1	0.024462	0	0.080737	0	0	0	0	0	0
ENST00000527559	ENSG00000166833	NAV2	0.024099	0.002514	0.079516	0.005361	0.001494	0.011694	0.008137	0.011694	0.014607
ENST00000474619	ENSG00000101310	SEC23B	0	0	0.07947	0	1e-05	0	0	0	1e-06
ENST00000473008	ENSG00000144857	BOC	0	0	0.079004	0	0	0.012325	0	0.012325	0
ENST00000592815	ENSG00000099622	CIRBP	0	0.010579	0.07835	0	0.035466	0	0	0	0
ENST00000291232	ENSG00000159958	TNFRSF13C	0	0	0.07794	0	0	0	0	0	0
ENST00000421968	ENSG00000070010	UFD1	0	0.034933	0.077338	0	0	0	0	0	0
ENST00000508077	ENSG00000164308	ERAP2	0	0	0.077273	0	0	0	0	0	0
ENST00000524990	ENSG00000110455	ACCS	0.035363	0	0.077011	0	0	0.005777	6e-05	0.005777	0
ENST00000479114	ENSG00000165209	STRBP	0.011049	0.016204	0.076739	0.004302	0.016479	0.008814	0.005135	0.008814	0.017509
ENST00000639583	ENSG00000204271	SPIN3	0	0	0.076173	0	0	0	0.018456	0	0
ENST00000547579	ENSG00000110911	SLC11A2	0	0	0.076018	0	0.040311	0	0.023475	0	0
ENST00000428880	ENSG00000074582	BCS1L	0	0	0.075907	0	0	0	0	0	0
ENST00000416504	ENSG00000125246	CLYBL	0.029462	0	0.075883	0	0.038143	0.010383	0	0.010383	0.005375
ENST00000619596	ENSG00000007264	MATK	0	0	0.075254	0	0	0.001203	0	0.001203	0
ENST00000636489	ENSG00000096093	EFHC1	0.00119	0	0.075152	0.000904	0	0	0.001884	0	0.011859
ENST00000581672	ENSG00000105655	ISYNA1	0.003755	0.006295	0.074955	0.0187	0.007013	0.030039	0	0.030039	0
ENST00000545132	ENSG00000162378	ZYG11B	0.005428	0.00664	0.074701	0	0.000127	0.018535	0.004354	0.018535	0.010956
ENST00000546342	ENSG00000104687	GSR	0	0	0.074425	0	0	0	0	0	0
ENST00000589663	ENSG00000126581	BECN1	0	0	0.07416	0	0	0.008148	0	0.008148	0
ENST00000568830	ENSG00000130731	METTL26	0	0	0.073577	0	0	0	0	0	0
ENST00000526970	ENSG00000181135	ZNF707	0	0	0.073499	0	0.002767	0	0	0	0
ENST00000589808	ENSG00000132026	RTBDN	0.013018	0	0.073438	0	0	0	0.018107	0	0
ENST00000618787	ENSG00000167637	ZNF283	0	0	0.073421	0	0.018454	0	0	0	0
ENST00000638489	ENSG00000124155	PIGT	0	0	0.07286	0	0	0	0	0	0
ENST00000606929	ENSG00000146243	IRAK1BP1	0	0	0.072771	0	0	0	0	0	0
ENST00000357797	ENSG00000198408	OGA	0.013223	0	0.072513	0	0.015651	0.032992	0	0.032992	0
ENST00000412985	ENSG00000185133	INPP5J	0	0.014146	0.072416	0	0	0	0.013012	0	5.7e-05
ENST00000546231	ENSG00000082805	ERC1	0	0.003324	0.072193	0	0	0.010938	0	0.010938	0.000985
ENST00000636645	ENSG00000196998	WDR45	0	0	0.072006	0	0	0	0	0	0
ENST00000374369	ENSG00000125965	GDF5	0	0	0.071986	0	0	0	0	0	0
ENST00000389272	ENSG00000168610	STAT3	0	0	0.070541	0	0	0	0	0	0
ENST00000601956	ENSG00000178078	STAP2	0.028363	0	0.070506	0	0	0	0	0	0
ENST00000419636	ENSG00000103148	NPRL3	0.036922	0	0.070416	0	0	0	0	0	0
ENST00000511160	ENSG00000163138	PACRGL	0	0.01173	0.069403	0	0	0	0.0325	0	0
ENST00000577499	ENSG00000174448	STARD6	0	0.013208	0.069326	0	0	0	0	0	0.03467
ENST00000574266	ENSG00000159842	ABR	0.004839	0.013307	0.069225	0	0	0.010289	0.007705	0.010289	0.003741
ENST00000396039	ENSG00000124171	PARD6B	0	0.012398	0.068317	0	0	0	0.018284	0	0
ENST00000525762	ENSG00000107614	TRDMT1	0	0	0.068188	0	0.012847	0	0	0	0
ENST00000620015	ENSG00000280071	GATD3B	0.004189	0.004881	0.068004	0.010354	0.007278	0.009163	0.00118	0.009163	0.006951
ENST00000614158	ENSG00000275489	C17orf98	0	0	0.067514	0	0	0	0.023483	0	0
ENST00000591363	ENSG00000172009	THOP1	0	0	0.067474	0	0	0	0	0	0.046295
ENST00000434439	ENSG00000138395	CDK15	0.01935	0.004166	0.067202	0	0	0	0.012552	0	0.030696
ENST00000481584	ENSG00000170260	ZNF212	0	0.02337	0.066962	0	0	0	0	0	0
ENST00000634582	ENSG00000165195	PIGA	0	0	0.066497	0	0	0	0	0	0
ENST00000257861	ENSG00000135407	AVIL	0	0	0.066111	0	0	0	0	0	0
ENST00000589774	ENSG00000006125	AP2B1	0.013004	0.014139	0.065837	0.005081	0	0	0	0	0
ENST00000369515	ENSG00000134198	TSPAN2	0	0	0.065749	0	0	0	0	0	0.047078
ENST00000421334	ENSG00000163596	ICA1L	0	0	0.065512	0	0	0	0.002919	0	0
ENST00000465530	ENSG00000185267	CDNF	0	0	0.065146	0	0	0	0	0	0.015534
ENST00000541236	ENSG00000134287	ARF3	0	0	0.065107	0	0	0	0	0	0
ENST00000395550	ENSG00000225697	SLC26A6	0.011218	0.000646	0.064017	0.000536	0.004186	0.007925	0.001352	0.007925	0.008696
ENST00000503785	ENSG00000077684	JADE1	0	0	0.06384	0	0	0	0	0	0
ENST00000611040	ENSG00000015475	BID	0	0	0.063729	0	0	0	0	0	0.017089
ENST00000588911	ENSG00000189164	ZNF527	0	0	0.063642	0	0	0	0	0	0
ENST00000430617	ENSG00000168397	ATG4B	0.000424	0	0.06319	0	0.003802	0.002174	0	0.002174	0
ENST00000396472	ENSG00000151327	FAM177A1	0	0.001437	0.063098	0.003535	0.004302	0	0	0	0.001481
ENST00000523832	ENSG00000006837	CDKL3	0	0	0.062813	0.013419	0	0	0	0	0
ENST00000433506	ENSG00000158683	PKD1L1	0	0	0.062672	0	0	0	0	0	0
ENST00000369718	ENSG00000143110	C1orf162	0	0	0.062624	0	0	0.041714	0	0.041714	0
ENST00000579741	ENSG00000172301	COPRS	0	0	0.062091	0	0	0	0	0	0
ENST00000590319	ENSG00000081665	ZNF506	0	0	0.061329	0	0	0	0.03838	0	0
ENST00000630942	ENSG00000158560	DYNC1I1	0	0	0.060977	0	0.032894	0	0.0037	0	0
ENST00000444776	ENSG00000032389	EIPR1	0.010757	0	0.060926	0	0	0	0.014582	0	0
ENST00000648614	ENSG00000005302	MSL3	0	0	0.0608	0	0	0	0	0	0
ENST00000635133	ENSG00000080503	SMARCA2	0.005544	0	0.059928	0	0.020141	0.005737	0	0.005737	0.001122
ENST00000566177	ENSG00000213658	LAT	0	0	0.059822	0	0	0	0	0	0
ENST00000635238	ENSG00000102100	SLC35A2	0	0	0.059799	0	0	0	0	0	0
ENST00000593981	ENSG00000062822	POLD1	0	0	0.059525	0	0	0	0	0	0
ENST00000419493	ENSG00000064601	CTSA	0	0	0.059425	0	0	0	0	0	0
ENST00000381116	ENSG00000122033	MTIF3	0	0	0.059228	0	0.03948	0	0	0	0
ENST00000512565	ENSG00000013561	RNF14	0	0	0.059192	0	0	0	0	0	0.043654
ENST00000639847	ENSG00000258839	MC1R	0	0	0.057922	0	0	0	0	0	0.019967
ENST00000531727	ENSG00000071894	CPSF1	0	0.007336	0.057406	0	0	0	0.001961	0	0
ENST00000640625	ENSG00000143473	KCNH1	0	0	0.057281	0	0	0	0	0	0
ENST00000428355	ENSG00000131374	TBC1D5	0	0	0.057088	0	0.013125	0	0	0	0
ENST00000622188	ENSG00000124785	NRN1	0	0	0.056354	0.001921	0	0	0	0	0
ENST00000597140	ENSG00000261857	MIA	0	0	0.056238	0	0	0	0	0	0
ENST00000403732	ENSG00000117676	RPS6KA1	0	0	0.056188	0	0.033086	0	0	0	0
ENST00000634721	ENSG00000169519	METTL15	0	0	0.055585	0	0	0	0	0	0
ENST00000641816	ENSG00000284638	AC005551.1	0	0.012135	0.055345	0	0	0	0	0	0
ENST00000583559	ENSG00000179094	AC129492.1	0	0	0.054751	0	0	0	0	0	0
ENST00000521517	ENSG00000164953	TMEM67	0.030256	0	0.054398	0	0	0.00037	0	0.00037	0
ENST00000455677	ENSG00000113522	RAD50	0	0	0.054132	0	0	0	0	0	0
ENST00000406337	ENSG00000083168	KAT6A	0	0	0.054049	0	0	0	0	0	0
ENST00000447885	ENSG00000127837	AAMP	0	0	0.054013	0	0	0	0	0	0
ENST00000554875	ENSG00000186469	GNG2	0	0	0.05377	0	0	0	0	0	0
ENST00000566681	ENSG00000172775	FAM192A	0	0	0.053733	0	0	0	0	0	0
ENST00000502598	ENSG00000198055	GRK6	0	0	0.053327	0	0.004702	0.013506	0	0.013506	0
ENST00000457623	ENSG00000116299	KIAA1324	0	0	0.05329	0	0	0	0	0	0
ENST00000420434	ENSG00000079263	SP140	0	0	0.052837	0.025596	0	0	0	0	0
ENST00000337990	ENSG00000126970	ZC4H2	0.000822	0.000539	0.052805	0.00394	0	0	0	0	0
ENST00000376083	ENSG00000135049	AGTPBP1	0.00095	0.001173	0.052738	0.001019	0.000996	0.000505	0.000567	0.000505	0.000625
ENST00000421304	ENSG00000071462	BUD23	0.000349	0.011536	0.05232	0	0.00046	0	0.031398	0	0
ENST00000600714	ENSG00000167766	ZNF83	0.002729	0	0.052114	3.4e-05	0.003344	0.016815	0.010825	0.016815	0
ENST00000471243	ENSG00000116729	WLS	0	0	0.052051	0	0	0	0	0	0
ENST00000402931	ENSG00000112983	BRD8	0.002942	9e-05	0.052051	0.000257	0.004095	0.003309	0.007651	0.003309	0.002406
ENST00000538037	ENSG00000177192	PUS1	0	0	0.051419	0	0.004347	0	0	0	0
ENST00000331762	ENSG00000184903	IMMP2L	0	0	0.05134	0	0	0	0	0	0
ENST00000533380	ENSG00000137522	RNF121	0	0	0.051315	0	0	0	0	0	0
ENST00000432533	ENSG00000124508	BTN2A2	0.004706	0	0.050624	0	0	0	0	0	0.008126
ENST00000646433	ENSG00000171453	POLR1C	0	0	0.050348	0	0	0	0	0	0
ENST00000415980	ENSG00000112367	FIG4	0.00601	0	0.049826	0	0.006864	0	0.009575	0	0.008043
ENST00000397280	ENSG00000196408	NOXO1	0.00424	0	0.04923	0	0	0	0	0	0
ENST00000396969	ENSG00000132002	DNAJB1	0	0	0.048652	0	0	0	0	0	0
ENST00000559905	ENSG00000166262	FAM227B	0	0	0.048556	0	0.042589	0	0	0	0
ENST00000639738	ENSG00000138760	SCARB2	0	0	0.048377	0	0	0	0	0	0
ENST00000340694	ENSG00000158528	PPP1R9A	0	0	0.048355	0	0	0.013372	0	0.013372	0.024076
ENST00000558453	ENSG00000140395	WDR61	0	0.005534	0.047866	0	0.002517	0.009646	0	0.009646	0.003693
ENST00000456846	ENSG00000137413	TAF8	0	0	0.047177	0	0.000472	0	0	0	0.00096
ENST00000431381	ENSG00000125931	CITED1	0	0.009722	0.046822	0.00041	0.00053	0	0	0	0
ENST00000558724	ENSG00000086666	ZFAND6	0.000688	0	0.046818	0.006621	0.001286	0.001237	0.035663	0.001237	0
ENST00000526057	ENSG00000166444	ST5	0	0	0.046524	0	0	0	0	0	0.005953
ENST00000636188	ENSG00000145020	AMT	0.016826	0	0.046458	0	0	0	0.002803	0	0
ENST00000358984	ENSG00000180777	ANKRD30B	0	0.015537	0.046292	0.004629	0	0	0	0	0.003987
ENST00000508229	ENSG00000162779	AXDND1	0	0	0.046096	0	0.009776	0	0	0	0
ENST00000476688	ENSG00000116337	AMPD2	0	0	0.045744	0	0	0	0	0	0
ENST00000420116	ENSG00000182473	EXOC7	0	0	0.045578	0	0	0	0	0	0
ENST00000431993	ENSG00000283697	HSFX3	0	0	0.044867	0	0	0.017604	0	0.017604	0.01958
ENST00000423345	ENSG00000133246	PRAM1	0.003374	0.007291	0.044749	0.004892	0.00388	0.002262	0.006108	0.002262	0.006565
ENST00000561508	ENSG00000103490	PYCARD	0	0	0.0447	0.012591	0	0	0	0	0.006337
ENST00000613853	ENSG00000185728	YTHDF3	0	0	0.044217	0	0	0	0.013577	0	0.000389
ENST00000431960	ENSG00000173402	DAG1	0	0.002435	0.043775	0	0	0	0.00238	0	0.025666
ENST00000292327	ENSG00000160808	MYL3	0	0	0.04374	0	0	0	0	0	0
ENST00000327259	ENSG00000179292	TMEM151A	0.006128	0	0.043655	0	0.003635	0.002922	0.003693	0.002922	0
ENST00000411752	ENSG00000173068	BNC2	0.00212	0	0.043452	0	0	0	0	0	0
ENST00000532250	ENSG00000133805	AMPD3	0	0	0.043359	0	0	0	0	0	0
ENST00000615250	ENSG00000274523	RCC1L	0	0	0.043094	0.000943	0	0.005658	0.006035	0.005658	0.011197
ENST00000378284	ENSG00000123179	EBPL	0	0	0.042411	0	0	0	0	0	0
ENST00000512918	ENSG00000138764	CCNG2	0	0	0.042341	0	0	0	0	0	0
ENST00000450787	ENSG00000198089	SFI1	0	0	0.042211	0	0	0	0	0	0
ENST00000409826	ENSG00000171227	TMEM37	0	0	0.042053	0	0	0	0	0	0
ENST00000397677	ENSG00000147457	CHMP7	0	0	0.041441	0	0.003637	0	0	0	0
ENST00000514229	ENSG00000138639	ARHGAP24	0.00038	0	0.041256	0	0	0	0	0	0
ENST00000602229	ENSG00000125730	C3	0.000218	0.003125	0.041231	0	0.00054	0.000281	0.000772	0.000281	0.000724
ENST00000423344	ENSG00000188649	CC2D2B	0	0	0.041005	0	0	0	0	0	0
ENST00000441637	ENSG00000055955	ITIH4	0	0	0.040852	0	0	0	0	0	0
ENST00000454227	ENSG00000154978	VOPP1	0.003315	0	0.040558	0	0	0	0	0	0
ENST00000529528	ENSG00000134339	SAA2	0	0	0.040257	0	0	0	0	0	0.007868
ENST00000406915	ENSG00000217442	SYCE3	0	0	0.040003	0	0	0	0	0	0.015127
ENST00000396435	ENSG00000124313	IQSEC2	0	0	0.039793	0	0	0	0	0	0
ENST00000413931	ENSG00000175600	SUGCT	0.004873	0	0.039771	0	0.003158	0	0	0	0
ENST00000524294	ENSG00000108852	MPP2	0	0	0.039717	0	0	0.00309	0	0.00309	0.00288
ENST00000441844	ENSG00000120158	RCL1	0	0	0.039553	0	0	0	0	0	0
ENST00000481299	ENSG00000198722	UNC13B	0	0	0.03954	0	0	0	0	0	0
ENST00000377431	ENSG00000161558	TMEM143	0.001663	0	0.039517	0	0	0	0	0	0
ENST00000599657	ENSG00000130669	PAK4	0.003787	0	0.039504	0	0	0	0	0	0.033908
ENST00000588248	ENSG00000004777	ARHGAP33	0	0.006417	0.03931	0	0	0.009838	0	0.009838	0
ENST00000509562	ENSG00000039319	ZFYVE16	0.009829	0	0.039131	0.000349	0.006949	0.009331	0	0.009331	0.002317
ENST00000421664	ENSG00000115380	EFEMP1	0.00069	0	0.038924	0	0.00072	0.019322	0.001434	0.019322	0
ENST00000507825	ENSG00000198625	MDM4	0	0	0.038906	0	0	0	0	0	0
ENST00000569086	ENSG00000179588	ZFPM1	0	0.006041	0.0386	0	0	0	0	0	0
ENST00000580638	ENSG00000134504	KCTD1	0	3e-06	0.038197	0	0.003281	0	0	0	0
ENST00000460865	ENSG00000154917	RAB6B	0	0	0.038067	0	0	0	0	0	0
ENST00000558176	ENSG00000140382	HMG20A	0	0	0.037706	0	0.002632	0.015155	0	0.015155	0.018264
ENST00000601824	ENSG00000167657	DAPK3	0.001096	0.00263	0.037691	0	0	0.00128	0	0.00128	0
ENST00000640952	ENSG00000213020	ZNF611	0.000525	0.000987	0.037609	6.9e-05	0.001124	0.003717	0.000147	0.003717	0.000591
ENST00000641089	ENSG00000127463	EMC1	0.000852	0.000957	0.037317	0	0	0.003085	0.001055	0.003085	0.000699
ENST00000634996	ENSG00000187391	MAGI2	0	0	0.037189	0	0	0	0	0	0.016051
ENST00000321844	ENSG00000179240	GVQW3	0	0	0.036908	0	0	0.008473	0	0.008473	0
ENST00000505299	ENSG00000164122	ASB5	0	0	0.036755	0	0	0	0	0	0
ENST00000498634	ENSG00000120068	HOXB8	0	0	0.036665	0	0	0	0	0	0
ENST00000444335	ENSG00000231068	KRTAP21-3	0	0	0.036525	0	0	0	0	0	0.00057
ENST00000593809	ENSG00000187994	RINL	0	0	0.036474	0	0	0	0	0	0
ENST00000452550	ENSG00000185437	SH3BGR	0	0	0.036392	0	0	0	0	0	0
ENST00000503336	ENSG00000155850	SLC26A2	0	0	0.036297	0	0	0	0.022182	0	0
ENST00000441933	ENSG00000164855	TMEM184A	0	0	0.036293	0.002684	0.027577	0.005486	0	0.005486	0
ENST00000617140	ENSG00000170909	OSCAR	0	0	0.035592	0	0.001072	0	0	0	0
ENST00000445580	ENSG00000068383	INPP5A	0	0	0.035443	0	0	0	0	0	0
ENST00000548710	ENSG00000123352	SPATS2	0	0	0.035357	0	0	0	0	0	0
ENST00000316027	ENSG00000183785	TUBA8	0	0	0.035063	0	0	0	0.013999	0	0
ENST00000512143	ENSG00000134853	PDGFRA	0	0	0.034789	0.00366	0	0	0.020902	0	0
ENST00000641359	ENSG00000284629	SCYGR1	0	0	0.03461	0	0	0.008797	0	0.008797	0
ENST00000336174	ENSG00000266173	STRADA	0.000181	0.000915	0.034503	0.000731	0.008278	0.000408	0.000588	0.000408	0.001137
ENST00000462226	ENSG00000134278	SPIRE1	0	0	0.034352	0	0	0	0.008864	0	0
ENST00000573826	ENSG00000040633	PHF23	0	0	0.034269	0.009576	0	0	0	0	0
ENST00000518107	ENSG00000164951	PDP1	0.00023	0.00374	0.03322	0.00237	0.000354	0.000308	0.000313	0.000308	0
ENST00000534360	ENSG00000137691	CFAP300	0.00168	0.004654	0.032599	0.004083	0	0.000651	0	0.000651	0.002156
ENST00000614631	ENSG00000205307	SAP25	0.000857	0	0.032251	0	0.008545	0.000256	0.004002	0.000256	0
ENST00000431009	ENSG00000152642	GPD1L	0	0.002845	0.031628	0	0.014332	0	0	0	0.006326
ENST00000430541	ENSG00000184343	SRPK3	0.018041	0	0.031559	0	0	0	0	0	0
ENST00000555249	ENSG00000119682	AREL1	0	0	0.031493	0	0	0	0	0	0
ENST00000307300	ENSG00000130414	NDUFA10	0.004293	0	0.031459	0.005559	0	0.000866	0	0.000866	0.004079
ENST00000591586	ENSG00000132016	C19orf57	0	0	0.031205	0	0	0	0	0	0
ENST00000567670	ENSG00000173638	SLC19A1	0	0	0.031128	0	0	0	0.009753	0	0
ENST00000462155	ENSG00000006652	IFRD1	0	0	0.030688	0	0	0.012295	0.011379	0.012295	0
ENST00000635851	ENSG00000164904	ALDH7A1	0.009787	0	0.030429	0	0	0.003325	0.01106	0.003325	0
ENST00000557907	ENSG00000140332	TLE3	0.005061	0.001779	0.030225	0	0.01491	0	0.002886	0	0.001358
ENST00000625755	ENSG00000148814	LRRC27	0	0	0.0301	0	0	0	0	0	0
ENST00000652588	ENSG00000157168	NRG1	0.003739	0.001841	0.030082	0.005247	0.006656	0.00343	0.001022	0.00343	0.003588
ENST00000438413	ENSG00000185499	MUC1	0	0	0.029982	0	0	0	0	0	0
ENST00000562918	ENSG00000140678	ITGAX	0	0	0.029754	0	0	0	0	0	0
ENST00000442536	ENSG00000136205	TNS3	0	0	0.02966	0.002635	0	0	0	0	0
ENST00000452073	ENSG00000186020	ZNF529	0.000332	0	0.029598	0	0	0	0	0	0.009569
ENST00000403610	ENSG00000189292	ALKAL2	0.00952	0	0.029434	0	0	0.006264	0	0.006264	0
ENST00000574070	ENSG00000181885	CLDN7	0	0	0.029317	0	0	0	0	0	0
ENST00000571028	ENSG00000141519	CCDC40	0	0	0.029019	0	0	0	0	0	0
ENST00000402604	ENSG00000157985	AGAP1	0.012362	0	0.028793	0	0	0.0018	0	0.0018	0
ENST00000406697	ENSG00000182326	C1S	0	0	0.02865	0	0	0	0	0	0
ENST00000532862	ENSG00000204839	MROH6	3.9e-05	0	0.028442	1.6e-05	0.000658	0.026182	0.002975	0.026182	0
ENST00000643001	ENSG00000107485	GATA3	0	0	0.028403	0	0	0	0	0	0
ENST00000596260	ENSG00000160013	PTGIR	0	0	0.028402	0	0	0	0	0	0
ENST00000380237	ENSG00000213931	HBE1	0	0	0.028101	0	0	0	0.002386	0	0
ENST00000453327	ENSG00000110881	ASIC1	0	0	0.02799	0	0	0	0.000666	0	0
ENST00000566216	ENSG00000157349	DDX19B	0	0	0.027817	0	0	0	0	0	0
ENST00000562346	ENSG00000103174	NAGPA	0	0	0.027566	0	0	0	0	0	0
ENST00000457723	ENSG00000130821	SLC6A8	0	0	0.027533	0	0	0	0	0	0
ENST00000424629	ENSG00000171469	ZNF561	0	0	0.027343	0	0	0	0	0	0
ENST00000598071	ENSG00000197619	ZNF615	0.000529	0.005025	0.026793	0.000448	0.000199	0.004098	3e-06	0.004098	0
ENST00000472477	ENSG00000102804	TSC22D1	0	0	0.026578	0	0.000348	0.004541	0.006586	0.004541	0
ENST00000490025	ENSG00000124508	BTN2A2	0	0	0.026405	0	0	0	0	0	0
ENST00000643715	ENSG00000284922	AP000812.5	0.004069	0	0.026271	0	0	0	0	0	0
ENST00000373525	ENSG00000085978	ATG16L1	0	0	0.02606	0	0	0	0	0	0
ENST00000576499	ENSG00000166596	CFAP52	0	0	0.025994	0	0	0	0	0	0
ENST00000621096	ENSG00000110047	EHD1	0	0	0.025985	0	0	0	0	0	0
ENST00000639034	ENSG00000007372	PAX6	0	0	0.025921	0	0.005155	0	0.002158	0	3e-06
ENST00000261861	ENSG00000103647	CORO2B	0.00734	0	0.025712	0	0.0171	0	0	0	0
ENST00000536877	ENSG00000256223	ZNF10	0.005676	0.002899	0.02564	0	0	0.005343	0	0.005343	0.002595
ENST00000570235	ENSG00000087258	GNAO1	0.002404	0	0.025597	0	0	0	0	0	0.003383
ENST00000637917	ENSG00000169057	MECP2	0	0	0.025411	0	0	0	0	0	0
ENST00000620139	ENSG00000118242	MREG	0	0	0.025389	0	0	0	0	0	0
ENST00000369272	ENSG00000131781	FMO5	0	0	0.025369	0	0	0.005806	0	0.005806	0
ENST00000439482	ENSG00000085831	TTC39A	0	0	0.025169	0	0	0	0.008895	0	0
ENST00000581676	ENSG00000167861	HID1	0	0	0.025009	0.000258	0	0	0	0	0
ENST00000560112	ENSG00000022976	ZNF839	0	0	0.024902	0	0	0	0	0	0
ENST00000539316	ENSG00000125409	TEKT3	0	0	0.024831	0	0	0	0	0	0
ENST00000560418	ENSG00000140575	IQGAP1	0.004626	0.001781	0.024288	0	0	0	0	0	0.00275
ENST00000597960	ENSG00000105701	FKBP8	0.003905	0.000941	0.024196	0.005909	0	0	0.000735	0	4.5e-05
ENST00000643191	ENSG00000159788	RGS12	0	0	0.023991	0.008403	0	0	0	0	0
ENST00000573449	ENSG00000140750	ARHGAP17	0.002204	0.001887	0.02386	0	0	0	0	0	0
ENST00000545990	ENSG00000111254	AKAP3	0	0	0.023836	0	0	0	0	0	0
ENST00000514546	ENSG00000127419	TMEM175	0	0	0.023716	0	0	0	0	0	0.011624
ENST00000532055	ENSG00000023191	RNH1	0	0	0.023291	0.012167	0	0	0	0	0
ENST00000434435	ENSG00000138375	SMARCAL1	0	0	0.023272	0.00307	0	0	0.005111	0	0
ENST00000641169	ENSG00000188124	OR2AG2	0	0	0.023147	0	0	0	0	0	0
ENST00000374030	ENSG00000174950	CD164L2	0	0	0.023081	0	0	0	0	0	0
ENST00000596019	ENSG00000197124	ZNF682	0	0	0.022993	0	0	0	0	0	0
ENST00000541458	ENSG00000181896	ZNF101	0	0	0.022959	0	0	0.004298	0	0.004298	0
ENST00000640634	ENSG00000138760	SCARB2	0	0	0.022889	0	0	0	0	0	0
ENST00000515609	ENSG00000143549	TPM3	0	0	0.022739	0	0	0	0	0	0
ENST00000470124	ENSG00000101940	WDR13	0	0	0.022507	0	0	0	0	0	0
ENST00000335271	ENSG00000047849	MAP4	0	0	0.022341	0.004841	0	0	0	0	0
ENST00000370231	ENSG00000183479	TREX2	0	0	0.022303	0	0	0	0	0	0
ENST00000497473	ENSG00000134330	IAH1	0	0	0.022203	0	0.017367	0	0	0	0
ENST00000525729	ENSG00000166323	C11orf65	0	0	0.021952	0	0	0	0	0	0
ENST00000651916	ENSG00000169255	B3GALNT1	0	0	0.021949	0	0	0	0	0	0
ENST00000528883	ENSG00000166387	PPFIBP2	0	0	0.021902	0	0	0	0	0	0
ENST00000429794	ENSG00000125931	CITED1	0	0.000229	0.02177	0	0	0	0	0	0
ENST00000572984	ENSG00000141556	TBCD	0.002234	0	0.021753	0.006015	0	0.003658	0	0.003658	0
ENST00000509733	ENSG00000164241	C5orf63	0	0	0.021638	0	0	0.000715	0	0.000715	0
ENST00000559671	ENSG00000137841	PLCB2	0	0	0.021507	0	0	0	0	0	0
ENST00000367315	ENSG00000118194	TNNT2	0	0	0.021421	0	0	0	0	0	0
ENST00000544460	ENSG00000180113	TDRD6	0	0	0.021421	0	0	0	0	0	0
ENST00000158009	ENSG00000073598	FNDC8	0	0	0.021357	0	0	0	0	0	0.005329
ENST00000640011	ENSG00000027075	PRKCH	0.001966	0.000336	0.021335	0	0.001076	1e-06	0	1e-06	0
ENST00000612042	ENSG00000234465	PINLYP	0.010052	0.001348	0.021217	0	0.000394	7e-06	0	7e-06	0
ENST00000606784	ENSG00000112837	TBX18	0	0.007958	0.021133	0	0	0	0	0	0
ENST00000409186	ENSG00000197991	AL592490.1	0	0	0.020789	0.00745	0	0.006866	0	0.006866	0
ENST00000435679	ENSG00000163898	LIPH	0	0	0.020717	0	0	0	0	0	0
ENST00000448220	ENSG00000173531	MST1	0.009768	0	0.020574	0	0	0	0	0	0
ENST00000551339	ENSG00000152556	PFKM	0.004618	0	0.020573	0.001402	0	0	0	0	0
ENST00000549417	ENSG00000111052	LIN7A	0	0	0.020422	0	0	0	0.010321	0	0
ENST00000505956	ENSG00000172771	EFCAB12	0	0	0.019994	0	0.00621	0	0	0	0
ENST00000436787	ENSG00000136709	WDR33	0	0	0.019746	6e-06	0	0	0	0	0
ENST00000564628	ENSG00000103024	NME3	0	0	0.019573	0	0	0	0	0	0.011088
ENST00000548698	ENSG00000139631	CSAD	0	0	0.019541	0	0	0.001741	0	0.001741	0
ENST00000455425	ENSG00000100399	CHADL	0	0	0.019413	0	0	0	0	0	0
ENST00000600258	ENSG00000171049	FPR2	0	0	0.019354	0	0	0	0	0	0
ENST00000521077	ENSG00000133943	DGLUCY	0	0	0.019082	0	0	0.010976	0	0.010976	0
ENST00000639821	ENSG00000164199	ADGRV1	0	0	0.019013	0	0	0	0	0	0.004949
ENST00000643910	ENSG00000101266	CSNK2A1	0	0	0.019011	0	0	0.010587	0	0.010587	0.006466
ENST00000302490	ENSG00000169282	KCNAB1	0	0	0.018998	0	0	0	0	0	0
ENST00000518247	ENSG00000113719	ERGIC1	0	0	0.01887	0	0	0	0	0	0.001369
ENST00000617677	ENSG00000158417	EIF5B	0.004541	0.003331	0.018689	0.002164	0.000227	0.000844	0.0001	0.000844	0.00012
ENST00000356385	ENSG00000142046	TMEM91	0	0	0.018617	0	0.009676	0	0.010339	0	0
ENST00000311822	ENSG00000105982	RNF32	0	0	0.018598	0	0	0	0	0	0.01292
ENST00000593606	ENSG00000268651	CTAG1A	0	0	0.018519	0	0	0	0	0	0
ENST00000627151	ENSG00000117114	ADGRL2	0	0	0.018433	0	0	0	0	0	0
ENST00000617789	ENSG00000183878	UTY	0	0	0.018388	0.006037	0	0	0	0	0
ENST00000590230	ENSG00000197561	ELANE	0	0	0.017978	0	0	0	0	0	0.004836
ENST00000535759	ENSG00000178928	TPRX1	0	0	0.017952	0.008691	0	0	0	0	0
ENST00000415854	ENSG00000115556	PLCD4	0	0	0.017908	0	0	0	0	0	0
ENST00000598389	ENSG00000152767	FARP1	0	0	0.017845	0	0	0	0	0	0
ENST00000527716	ENSG00000168062	BATF2	0	0	0.017744	0	0	0	0	0	0
ENST00000368555	ENSG00000130643	CALY	0	0	0.017703	0	0	0	0	0	0
ENST00000640461	ENSG00000129159	KCNC1	0.007239	0	0.017208	0	0	0	0	0	0
ENST00000520368	ENSG00000156787	TBC1D31	0	0	0.017037	0	0	0	0	0	0
ENST00000521564	ENSG00000147614	ATP6V0D2	0	0	0.017023	0	0	0	0	0	0
ENST00000376073	ENSG00000204475	NCR3	0.007183	0	0.016847	0	0	0	0	0	0.007553
ENST00000586638	ENSG00000130208	APOC1	0	0	0.016789	0	0	0	0	0	0.000122
ENST00000335223	ENSG00000187024	PTRH1	0	0	0.016665	0	0	0.00517	0	0.00517	0
ENST00000549022	ENSG00000152556	PFKM	0	0	0.016656	0.004299	0	0	0.006414	0	0.003768
ENST00000264231	ENSG00000121577	POPDC2	0	0	0.016511	0	0	0	0	0	0
ENST00000412249	ENSG00000164081	TEX264	0.001611	0.001486	0.016425	0.001256	0.001843	0.00066	0	0.00066	0.000576
ENST00000540292	ENSG00000166833	NAV2	1e-06	0	0.016374	0	0	0	3.2e-05	0	1.1e-05
ENST00000406354	ENSG00000145391	SETD7	0.002354	0	0.016369	0	0.002074	0	0	0	0.002546
ENST00000638075	ENSG00000096093	EFHC1	0	0	0.016334	0	0	0	0	0	0
ENST00000414594	ENSG00000164402	2021-09-08	0	0	0.01628	0	0	0	0	0	0
ENST00000560245	ENSG00000105419	MEIS3	0.006801	0.000804	0.016211	0.000582	0.000661	0.000336	0.003767	0.000336	0.001049
ENST00000395590	ENSG00000079974	RABL2B	0	0	0.016145	0	0	0	0	0	0
ENST00000616409	ENSG00000104177	MYEF2	0	0.002657	0.015911	0.000192	0	7.6e-05	0.003492	7.6e-05	0
ENST00000334035	ENSG00000113742	CPEB4	0	0	0.015909	0	0	0	0	0	0
ENST00000445628	ENSG00000100151	PICK1	0	0	0.015889	0	0	0	0	0	0
ENST00000377924	ENSG00000204913	LRRC3C	0	0	0.015787	0	0	0	0	0	0.007324
ENST00000595992	ENSG00000132002	DNAJB1	0	0	0.015675	0	0	0	0	0	0
ENST00000472047	ENSG00000169764	UGP2	0.003059	0	0.015547	0	0	0	0	0	0.004
ENST00000453071	ENSG00000164744	SUN3	0	0	0.015536	0	0	0	0	0	0
ENST00000450022	ENSG00000128294	TPST2	0	0	0.015385	0	0	0	0	0	0
ENST00000642146	ENSG00000125304	TM9SF2	0	0	0.015269	0	0	0	0	0	0
ENST00000392112	ENSG00000130396	AFDN	0	0	0.015182	0	0	0	0	0	0
ENST00000434115	ENSG00000069020	MAST4	0	0	0.015149	0.00709	0	0	0	0	0
ENST00000495225	ENSG00000175110	MRPS22	0	0	0.015104	0	0	0	0	0	0
ENST00000513751	ENSG00000172497	ACOT12	0	0	0.014999	0	0	0	0	0	0
ENST00000442892	ENSG00000211584	SLC48A1	0	0	0.014961	0	0	0	0.000793	0	0
ENST00000510582	ENSG00000168944	CEP120	0	0	0.014826	0	0	0.010871	0	0.010871	0.002089
ENST00000450067	ENSG00000168096	ANKS3	0	0	0.014702	0.003086	0.004266	0.00025	0	0.00025	0
ENST00000646303	ENSG00000197912	SPG7	0	0.001373	0.014604	0	0	0	0.007306	0	0
ENST00000474834	ENSG00000141371	C17orf64	0	0	0.01447	0.002664	0.008355	0	0	0	0
ENST00000419333	ENSG00000161217	PCYT1A	0.007652	0	0.01428	0	0	0	0	0	0
ENST00000380327	ENSG00000135451	TROAP	1e-06	1e-06	0.014244	1e-06	2e-06	0	0	0	0.001228
ENST00000634811	ENSG00000169118	CSNK1G1	0	0	0.014174	0	0	0.00096	0.000398	0.00096	0.000841
ENST00000517895	ENSG00000128694	OSGEPL1	0.000588	0.001597	0.014038	0.000666	0.000785	0.000817	2.2e-05	0.000817	1e-05
ENST00000622875	ENSG00000164330	EBF1	0	0	0.014018	0	0	0	0	0	0
ENST00000371311	ENSG00000236446	CT47B1	0	0	0.013917	0	0	0	0.007057	0	0
ENST00000439131	ENSG00000197734	C14orf178	0	0	0.013815	0	0	0	0	0	0
ENST00000543963	ENSG00000162006	MSLNL	0	0	0.013784	0	0.001917	0	0	0	0.00409
ENST00000316528	ENSG00000118513	MYB	0	0	0.013756	0	0	0	0.00202	0	0
ENST00000368444	ENSG00000164434	FABP7	0	0	0.013746	0	0	0	0	0	0
ENST00000550080	ENSG00000136040	PLXNC1	0	0	0.013507	0	0	0	0	0	0
ENST00000576996	ENSG00000141556	TBCD	0.002789	0	0.013409	0	0	0	0	0	0.001859
ENST00000647078	ENSG00000165699	TSC1	0	0	0.013396	0	0	0	0	0	0
ENST00000317118	ENSG00000113448	PDE4D	0	0	0.013379	0.002474	0	0	0.003005	0	0.000545
ENST00000646189	ENSG00000159023	EPB41	0	0	0.013296	0	0	0	0	0	0.002487
ENST00000333496	ENSG00000188603	CLN3	0	0	0.013204	0.006097	0	0	0	0	0
ENST00000403657	ENSG00000035115	SH3YL1	0	0.005572	0.012933	0	0	0.000615	0	0.000615	0.000353
ENST00000649119	ENSG00000156650	KAT6B	0.000199	0	0.012926	0	0	0	0	0	0.009621
ENST00000520270	ENSG00000134014	ELP3	0	0	0.012781	0	0	0	0	0	0
ENST00000638587	ENSG00000204217	BMPR2	0.004466	0.001677	0.012672	0	9e-06	0.001715	0	0.001715	0.004567
ENST00000582592	ENSG00000082397	EPB41L3	0	0	0.012629	0	0	0	0	0	0
ENST00000509047	ENSG00000130844	ZNF331	0.000315	0	0.012626	0	0	0	0	0	0
ENST00000382614	ENSG00000206013	IFITM5	0	0	0.012555	0	0	0	0	0	0
ENST00000503385	ENSG00000164023	SGMS2	0	0	0.012412	0	0	0	0	0	0
ENST00000410107	ENSG00000111846	GCNT2	0.002257	0	0.012395	0	0	0	0.003242	0	0
ENST00000611931	ENSG00000271383	NBPF19	0	0	0.012394	0	0.002627	0	0	0	0
ENST00000643471	ENSG00000187848	P2RX2	0	0	0.012382	0	0	0	0	0	0
ENST00000617423	ENSG00000117601	SERPINC1	0	0	0.012365	0	0	0	0	0	0
ENST00000467132	ENSG00000196136	SERPINA3	0	0	0.012317	0	0	0	0	0	0
ENST00000553605	ENSG00000185246	PRPF39	0	0	0.01214	0	0	0	0	0	0
ENST00000626438	ENSG00000182149	IST1	0	0	0.012073	0	0	0	0	0	0
ENST00000254227	ENSG00000131910	NR0B2	0	0	0.011898	0	0	0	0	0	0
ENST00000437152	ENSG00000125731	SH2D3A	0	0	0.011867	0	0.004567	0	0	0	0
ENST00000395435	ENSG00000129103	SUMF2	0	0	0.011834	0	0	0.006838	0	0.006838	0.004398
ENST00000409480	ENSG00000204120	GIGYF2	0	0	0.011827	0	0	0	0	0	0.003865
ENST00000298943	ENSG00000165985	C1QL3	0.001483	0	0.01172	0	0	0.003027	0.003945	0.003027	0.003032
ENST00000378330	ENSG00000167522	ANKRD11	0	0	0.011636	0.001897	0.000177	0	0.001427	0	0.000277
ENST00000562385	ENSG00000048462	TNFRSF17	0	0	0.011601	0	0	0	0	0	0
ENST00000367992	ENSG00000158869	FCER1G	0	0.002202	0.011521	0	0.003348	0	0	0	0
ENST00000427603	ENSG00000071054	MAP4K4	0	0	0.011512	0	0	0	0	0	0
ENST00000536856	ENSG00000166682	TMPRSS5	0.005099	0	0.011437	0	0	0	0	0	0
ENST00000368732	ENSG00000143546	S100A8	0	0	0.011431	0	0	0	0	0	0
ENST00000395783	ENSG00000133027	PEMT	0.004557	0	0.011336	0	0	0.001374	0	0.001374	0
ENST00000417999	ENSG00000100399	CHADL	0	0	0.011161	0	0	0	0	0	0
ENST00000416783	ENSG00000185013	NT5C1B	0	0	0.011159	0	0	0	0	0	0
ENST00000414982	ENSG00000032444	PNPLA6	0	0	0.011151	0	0	0	0	0	0
ENST00000419693	ENSG00000106266	SNX8	0	0	0.011134	0	0	0	0	0	0
ENST00000376414	ENSG00000169508	GPR183	0	0	0.010968	0	0	0	0	0	0
ENST00000431415	ENSG00000104081	BMF	0	0	0.010955	0	0	0	0	0	0
ENST00000494103	ENSG00000243989	ACY1	0	0	0.010866	0	0	0	0	0	0
ENST00000454145	ENSG00000184792	OSBP2	0	0	0.010737	0	0	0	0	0	0
ENST00000531096	ENSG00000166394	CYB5R2	0.001124	0.000566	0.010566	0	0.000792	0.001498	0.001208	0.001498	0
ENST00000560071	ENSG00000092098	RNF31	0	0.002244	0.010542	0	0	0	0	0	0.001589
ENST00000555542	ENSG00000027075	PRKCH	0	0	0.010524	0	0	1.6e-05	0	1.6e-05	0
ENST00000502942	ENSG00000171234	UGT2B7	0	0	0.010331	0	0	0	0	0	0
ENST00000555243	ENSG00000070778	AL162171.1	0	0	0.010201	0	0	0	0.001885	0	0.005649
ENST00000456946	ENSG00000162931	TRIM17	0	0.000898	0.010047	0	0	0	0	0	0
ENST00000340650	ENSG00000187566	NHLRC1	0.003505	0	0.010044	0	0	0.006599	0	0.006599	0
ENST00000470827	ENSG00000125037	EMC3	5.1e-05	0	0.010014	0	0	0	0	0	0
ENST00000615497	ENSG00000065882	TBC1D1	0	0	0.010011	0	0	0	0.005175	0	0
ENST00000434998	ENSG00000138380	CARF	0	1e-06	0.009932	0	0	0	5.6e-05	0	0
ENST00000373691	ENSG00000186810	CXCR3	0	0	0.009931	0.003846	0	0	0	0	0
ENST00000489517	ENSG00000224940	PRRT4	0	0	0.009794	0	0	0	0	0	0
ENST00000323061	ENSG00000177432	NAP1L5	0	0	0.009651	0	0	0	0	0	0
ENST00000601773	ENSG00000160321	ZNF208	0	0	0.009614	0	0	0	0	0	0
ENST00000508675	ENSG00000197826	CFAP299	0	0	0.009557	0	0	0	0	0	0
ENST00000423582	ENSG00000161298	ZNF382	0	0	0.00945	0	0	0	0	0	0
ENST00000610521	ENSG00000147873	IFNA5	0	0	0.009363	0	0	0	0	0	0
ENST00000642069	ENSG00000284730	AC068987.5	0	0	0.009363	0	0.009253	0	0	0	0
ENST00000416114	ENSG00000066248	NGEF	0	0	0.009329	0	0	0	0	0	0
ENST00000491233	ENSG00000163359	COL6A3	0	0	0.009262	0	0	0	0	0	0
ENST00000395126	ENSG00000068028	RASSF1	0	0	0.009223	0	0	0	0	0	0
ENST00000548311	ENSG00000135451	TROAP	3.9e-05	0.000187	0.009183	7.7e-05	0.000326	9.9e-05	4.8e-05	9.9e-05	0.007347
ENST00000614075	ENSG00000168096	ANKS3	0.003903	0.000166	0.00916	0.001972	0.000211	0.000119	0.000264	0.000119	0.001162
ENST00000329454	ENSG00000183888	SRARP	0	0.00307	0.009122	0.002355	0	0	0	0	0
ENST00000371776	ENSG00000122136	OBP2A	0	0	0.009031	0	0	0	0	0	0
ENST00000479867	ENSG00000065371	ROPN1	0	0	0.009019	0	0	0	0	0	0.003504
ENST00000624868	ENSG00000172208	OR4X2	0	0	0.009015	0	0	0	0	0	0
ENST00000410058	ENSG00000188064	WNT7B	0	0	0.008982	0	0	0	0	0	0
ENST00000407838	ENSG00000170419	VSTM2A	0	0	0.008908	0	0	0	0	0	0
ENST00000246801	ENSG00000126467	TSKS	0	0	0.008874	0	0	0.005652	0	0.005652	0
ENST00000371248	ENSG00000139722	VPS37B	0	0	0.008851	0	0	0.002308	0.003394	0.002308	0
ENST00000347785	ENSG00000110448	CD5	0.00252	0	0.008846	0	0	0	0	0	0
ENST00000427777	ENSG00000100376	FAM118A	0.004923	0.002925	0.008821	0	0	0	0	0	0
ENST00000577195	ENSG00000072134	EPN2	0	0	0.008754	0	0	0	0	0	0
ENST00000370346	ENSG00000125533	BHLHE23	0	0	0.008742	0	0	0	0	0	0
ENST00000381470	ENSG00000158856	DMTN	0	0	0.0087	0	0	0.00106	0	0.00106	0
ENST00000449920	ENSG00000127948	POR	0	0	0.008599	0	0	0.004892	0	0.004892	0
ENST00000600247	ENSG00000011243	AKAP8L	0.001567	0	0.008387	0	0	0.00127	0	0.00127	0
ENST00000568305	ENSG00000101440	ASIP	0	0	0.008304	0	0	0	0	0	0
ENST00000588233	ENSG00000064547	LPAR2	0	0	0.008289	0	0	0	0	0	0
ENST00000371126	ENSG00000198889	DCAF12L1	0	0	0.008288	0	0	0	0.005604	0	0
ENST00000589132	ENSG00000082805	ERC1	0	0	0.008287	0	0	0	0	0	0
ENST00000440718	ENSG00000152683	SLC30A6	0	0	0.008251	0	0	0.000105	0	0.000105	0
ENST00000623441	ENSG00000279408	AC135068.3	0	0	0.008214	0	0	0.006395	0	0.006395	0
ENST00000415863	ENSG00000157578	LCA5L	0	0	0.008205	0	0	0	0	0	0
ENST00000423932	ENSG00000196184	OR10J1	0	0	0.008167	0	0	0	0	0	0
ENST00000410007	ENSG00000163939	PBRM1	0.00064	0.000849	0.008136	0.000498	0.000674	0.000462	0.000523	0.000462	0.0031
ENST00000529629	ENSG00000149260	CAPN5	0.002414	0	0.00801	0.001126	0	0	0.000978	0	0.001833
ENST00000538666	ENSG00000127318	IL22	0	0	0.007932	0	0	0	0	0	0
ENST00000443874	ENSG00000226690	AC013470.2	0	0	0.007902	0	0	0	0	0	0
ENST00000427930	ENSG00000077044	DGKD	0	0	0.007891	0	0	0	0	0	0
ENST00000530637	ENSG00000187954	CYHR1	0.000569	0.00104	0.007764	0.000298	0.001815	0.002451	0.0013	0.002451	0.00086
ENST00000620189	ENSG00000162946	DISC1	0	0	0.007706	0.000234	0	1e-06	0.000385	1e-06	0
ENST00000651246	ENSG00000128656	CHN1	0	0	0.007612	0	0	0.000427	0	0.000427	0
ENST00000597118	ENSG00000105402	NAPA	0	0	0.007495	0	0	0	0	0	0
ENST00000262113	ENSG00000036448	MYOM2	0.004248	0	0.007417	0	0.00132	0	0	0	7e-06
ENST00000543654	ENSG00000185864	NPIPB4	0	0	0.007382	0	0	0	0	0	0
ENST00000466478	ENSG00000082996	RNF13	0	0	0.00738	0	0.001847	0	0	0	0
ENST00000504995	ENSG00000186318	BACE1	0	0	0.007374	0	0.001812	0	0	0	0
ENST00000591562	ENSG00000131471	AOC3	0	0	0.007362	0	0	0	0	0	0
ENST00000564671	ENSG00000166848	TERF2IP	0	0	0.007299	0	0	0.005859	0	0.005859	0
ENST00000381293	ENSG00000134352	IL6ST	0	0	0.007267	0	0	0	0	0	0
ENST00000354177	ENSG00000162430	SELENON	0	0	0.007209	0	0	0	0	0	0
ENST00000508249	ENSG00000109332	UBE2D3	0	0	0.007136	0	0.00203	0	0	0	0.001232
ENST00000421578	ENSG00000110880	CORO1C	0.000203	0.001488	0.00713	0.000644	0	0.000771	0.000241	0.000771	0.001594
ENST00000265132	ENSG00000106927	AMBP	0	0	0.007127	0	0	0	0	0	0
ENST00000300119	ENSG00000166866	MYO1A	0	0	0.007109	0	0	0	0	0	0
ENST00000367364	ENSG00000081237	PTPRC	0.002854	0	0.007108	0	0	0	0.001236	0	0
ENST00000636406	ENSG00000183454	GRIN2A	0	0	0.007085	0	0	0	0	0	0
ENST00000507165	ENSG00000169026	SLC49A3	0	0	0.007032	0	0	0	0	0	0
ENST00000511964	ENSG00000167100	SAMD14	0	0	0.006973	0	0	0	0	0	0
ENST00000528746	ENSG00000170325	PRDM10	0.000324	0	0.00697	0	0.003127	0.000233	0	0.000233	0.000229
ENST00000636057	ENSG00000147862	NFIB	0.001646	0.00015	0.006878	0	0	0.001962	0	0.001962	0
ENST00000476743	ENSG00000005302	MSL3	0	0	0.006849	0	0	0	0	0	0
ENST00000639566	ENSG00000139174	PRICKLE1	0	0	0.006848	0	0	0	0	0	0
ENST00000494479	ENSG00000095794	CREM	0	0	0.006759	0.000763	0	0	0	0	0
ENST00000351546	ENSG00000139737	SLAIN1	0	0	0.006705	0	0	0	0.000758	0	3e-06
ENST00000399759	ENSG00000196689	TRPV1	0.004559	0.000509	0.006701	0	0	0	0.001342	0	0.001509
ENST00000570836	ENSG00000161905	ALOX15	0	0	0.006639	0	0.003313	0	0	0	0
ENST00000367070	ENSG00000123838	C4BPA	0	0	0.006597	0	0	0	0	0	0
ENST00000627388	ENSG00000140332	TLE3	0	0	0.006591	0	0	0.005216	0	0.005216	0
ENST00000518887	ENSG00000081059	TCF7	5.2e-05	0	0.00655	0	0	2.6e-05	6e-06	2.6e-05	0.000228
ENST00000612235	ENSG00000182985	CADM1	0	0.001768	0.006545	0	0	0	0	0	0
ENST00000507085	ENSG00000082269	FAM135A	0	0	0.006427	0	0	0	0.002824	0	0
ENST00000475466	ENSG00000089101	CFAP61	0	0	0.006424	0	0.000207	0	0	0	0
ENST00000550139	ENSG00000184613	NELL2	0.00299	0	0.006409	0	0	0	0.003858	0	0
ENST00000637969	ENSG00000140718	FTO	0.002727	0	0.006397	0	0	0	0	0	0
ENST00000237275	ENSG00000118491	ZC2HC1B	0	0	0.006385	0	0	0	0	0	0
ENST00000370940	ENSG00000197568	HHLA3	3.5e-05	0.000165	0.006371	4e-06	2.1e-05	0.000282	0	0.000282	0.004666
ENST00000347667	ENSG00000182240	BACE2	0.002688	0.001001	0.006312	0	0.001053	0.003452	0	0.003452	0
ENST00000360132	ENSG00000003400	CASP10	0	0	0.006297	0	0.000346	0.00139	0	0.00139	0
ENST00000246081	ENSG00000125879	OTOR	0	0	0.006256	0	0	0	0	0	0
ENST00000564022	ENSG00000140386	SCAPER	0	0	0.006205	0	0	0	0	0	0.001757
ENST00000411683	ENSG00000110047	EHD1	0	0	0.006201	0	0	0	0	0	0
ENST00000340363	ENSG00000187997	C17orf99	0	0	0.006198	0	0	0	0	0	0
ENST00000333999	ENSG00000187003	ACTL7A	0	0	0.006185	0	0	0	0	0	0
ENST00000295297	ENSG00000163145	C1QTNF7	0	0	0.006139	0	0	0	0	0	0
ENST00000515290	ENSG00000112200	ZNF451	0	0	0.006136	0	0	0	0	0	0
ENST00000554347	ENSG00000118307	CASC1	0	0	0.006129	0	0	0	0	0	0
ENST00000450393	ENSG00000100997	ABHD12	0	0	0.006077	0	0	0.003176	0	0.003176	0
ENST00000638023	ENSG00000122641	INHBA	0	0	0.006072	0	0	0	0	0	0
ENST00000291890	ENSG00000189430	NCR1	0	0	0.006041	0	0	0	0	0	0
ENST00000457470	ENSG00000175003	SLC22A1	0	0.001465	0.006011	0	0	0	0	0	0
ENST00000645270	ENSG00000177189	RPS6KA3	0	0	0.005997	0	0	0	0	0	0
ENST00000462107	ENSG00000106327	TFR2	0.001445	0	0.005903	0	0	0	0	0	0
ENST00000524279	ENSG00000163705	FANCD2OS	0	0	0.005875	0	0	0	0	0	0
ENST00000403880	ENSG00000128294	TPST2	0.002312	0	0.005835	0	0	0	0.00184	0	0
ENST00000547015	ENSG00000065357	DGKA	0	0	0.005814	0.000626	0	0.003457	0	0.003457	0
ENST00000376708	ENSG00000204612	FOXB2	0	0	0.00581	0	0	0	0	0	0
ENST00000264834	ENSG00000105610	KLF1	0	0	0.005736	0	0	0	0	0	0
ENST00000514860	ENSG00000109466	KLHL2	0	0	0.005726	0	0	0	0	0	0
ENST00000533225	ENSG00000166444	ST5	0	0	0.005706	0	0	0.005922	0	0.005922	0
ENST00000514778	ENSG00000170365	SMAD1	0	0	0.00566	0	0	0	0	0	0
ENST00000287585	ENSG00000156959	LHFPL4	0	0	0.005658	0	0	0	0	0	0
ENST00000469863	ENSG00000243989	ACY1	0	0	0.005625	0	0	0	0	0	0
ENST00000648853	ENSG00000184500	PROS1	0	0.00079	0.005614	0	0	0	0	0	0
ENST00000512870	ENSG00000173597	SULT1B1	0	0	0.005542	0	0	0	0	0	0
ENST00000544969	ENSG00000211455	STK38L	0.001997	0	0.005534	0	0	0	0	0	0
ENST00000296091	ENSG00000196653	ZNF502	0	0	0.005482	0	0	0.002268	0	0.002268	0
ENST00000599900	ENSG00000131355	ADGRE3	0	0	0.005478	0	0	0	0	0	0
ENST00000371220	ENSG00000153294	ADGRF4	0	0	0.00539	0	0	0	0	0	0
ENST00000518797	ENSG00000019582	CD74	0	0	0.005351	0	0	0	0	0	0
ENST00000395216	ENSG00000197162	ZNF785	0	0	0.005269	0	0	0.005023	0	0.005023	0
ENST00000521315	ENSG00000168484	SFTPC	0.002853	0	0.005212	0	0	0	0	0	0
ENST00000621092	ENSG00000115297	TLX2	0	0	0.00512	0	0	0	0	0	0
ENST00000409726	ENSG00000132329	RAMP1	0	0	0.00512	0	0	0	0	0	0
ENST00000627982	ENSG00000089335	ZNF302	0	0	0.005119	0	0	0	0	0	0
ENST00000642047	ENSG00000170683	OR10A3	0	0	0.005108	0.001879	0	0	0	0	0.001106
ENST00000250003	ENSG00000129152	MYOD1	0	0	0.005091	0	0	0	0	0	0
ENST00000471459	ENSG00000120093	HOXB3	0	0	0.00507	0	0.001252	0	0	0	0
ENST00000503056	ENSG00000165671	NSD1	0	0	0.005065	0	0	0	0	0	0
ENST00000480740	ENSG00000198843	SELENOT	0	0	0.005065	0	0	0	0.003647	0	0
ENST00000255266	ENSG00000132915	PDE6A	0	0	0.005064	0	0.001571	0	0.001679	0	0
ENST00000492775	ENSG00000178460	MCMDC2	0	7.9e-05	0.005047	0	0	0	0	0	0
ENST00000542176	ENSG00000149212	SESN3	0.001569	0	0.005024	0	0.000557	0	0	0	0
ENST00000425530	ENSG00000117602	RCAN3	0.001185	0	0.00502	0	0	0	0	0	0
ENST00000594209	ENSG00000171747	LGALS4	0	0	0.00498	0	0	0	0	0	0
ENST00000399143	ENSG00000214866	DCDC2C	0	0	0.004925	0	0	0	0	0	0
ENST00000647590	ENSG00000112541	PDE10A	0	0	0.004924	0	0	0	0	0	0
ENST00000309017	ENSG00000143851	PTPN7	0	0	0.00486	0	0	0.00197	0.002489	0.00197	0
ENST00000614927	ENSG00000254206	NPIPB11	0	0	0.004813	0	0	0	0	0	0
ENST00000446120	ENSG00000143036	SLC44A3	0	0	0.004796	0	0.001224	0	0	0	0
ENST00000374329	ENSG00000117643	MAN1C1	0	0	0.00479	0	0	0	0	0	0
ENST00000602222	ENSG00000105771	SMG9	0	0	0.004781	0.000701	0.000537	0	0	0	0
ENST00000360221	ENSG00000108825	PTGES3L-AARSD1	0	0	0.004742	0	0	0	0	0	0
ENST00000423548	ENSG00000171509	RXFP1	0	0	0.004624	0	0	0	0	0	0
ENST00000405844	ENSG00000173452	TMEM196	0	0	0.004559	0	0	0	0	0	0
ENST00000326771	ENSG00000112214	FHL5	0	0	0.00455	0	0	0	0	0	0
ENST00000329773	ENSG00000183695	MRGPRX2	0	0	0.004539	0	0	0	0	0	0
ENST00000297988	ENSG00000165269	AQP7	0	0	0.004484	0	0	0	0	0	0
ENST00000523136	ENSG00000169045	HNRNPH1	0	0	0.004451	0	0	0	0	0	0
ENST00000522821	ENSG00000143643	TTC13	0	0	0.004424	0	0	0	0	0	0
ENST00000376873	ENSG00000134873	CLDN10	0	0	0.004312	0	0	0	0	0	0
ENST00000433934	ENSG00000078814	MYH7B	0	0	0.004312	0	0	0	0	0	0
ENST00000447398	ENSG00000105953	OGDH	0	0	0.004289	0.001084	0.000536	0.00032	0	0.00032	0
ENST00000609853	ENSG00000148429	USP6NL	0	0	0.004288	0	0	0	0	0	0.002902
ENST00000414489	ENSG00000179820	MYADM	0	0	0.004267	0	0	0	0	0	0
ENST00000588898	ENSG00000170832	USP32	0	0	0.004263	0	0	0	0	0	0
ENST00000521857	ENSG00000003987	MTMR7	0	0	0.004254	0	0	0	0	0	0
ENST00000544406	ENSG00000187510	C12orf74	0	0	0.004231	0	0	0	0	0	0
ENST00000426154	ENSG00000136193	SCRN1	0.000949	0.000174	0.004219	0.000101	0.000744	0.001719	0.000281	0.001719	0.000374
ENST00000215727	ENSG00000099937	SERPIND1	0	0	0.004181	0	0	0	0	0	0
ENST00000311303	ENSG00000140798	ABCC12	0	0	0.004166	0	0	0	0	0	0.001816
ENST00000281441	ENSG00000151715	TMEM45B	0	0	0.004136	0	0	0	0	0	0
ENST00000647992	ENSG00000187242	KRT12	0	0	0.004124	0	0	0	0	0	0
ENST00000463929	ENSG00000136141	LRCH1	0	0	0.00409	0	0	0	0	0	0
ENST00000642874	ENSG00000120049	KCNIP2	0	0	0.004	0	0	0	0	0	0
ENST00000338352	ENSG00000189401	OTUD6A	0	0	0.003994	0	0	0	0	0	0
ENST00000505618	ENSG00000168421	RHOH	0	0	0.003988	0	0	0	0	0	0
ENST00000305570	ENSG00000197020	ZNF100	0	0	0.003973	0	0	0	0	0	0
ENST00000368482	ENSG00000163239	TDRD10	0	0	0.003964	0	0	0	0	0	0
ENST00000410011	ENSG00000072163	LIMS2	0	0	0.003958	0	0	0	0	0	0
ENST00000344373	ENSG00000131355	ADGRE3	0	0	0.003954	0	0.002756	0	0	0	0
ENST00000399506	ENSG00000132535	DLG4	0.000179	0	0.003901	0	0	0.001561	0	0.001561	0
ENST00000637504	ENSG00000162341	TPCN2	0	0	0.003894	0	0	0	0	0	0
ENST00000451259	ENSG00000145819	ARHGAP26	0	0	0.003858	0	0	0	0	0	0
ENST00000557771	ENSG00000092200	RPGRIP1	0	0	0.003845	0	0	0	0	0	0.00128
ENST00000267845	ENSG00000140287	HDC	0	0	0.003842	0	0.003695	0	0	0	0
ENST00000506563	ENSG00000134058	CDK7	0	0	0.003811	0.00014	0.000287	0.000992	0.001274	0.000992	0.000151
ENST00000370336	ENSG00000080007	DDX43	0	0	0.003803	0	0	0.003052	0	0.003052	0
ENST00000473745	ENSG00000128604	IRF5	0	0	0.003782	0	0	0	0.000301	0	0.001968
ENST00000610743	ENSG00000005206	SPPL2B	0.0003	0.000257	0.003774	0.000184	0.000525	0.00074	0.000566	0.00074	0.000171
ENST00000392781	ENSG00000169255	B3GALNT1	0	0	0.003716	0	0	0	0	0	0
ENST00000405974	ENSG00000176771	NCKAP5	0	0	0.00371	0	0	0	0	0	0
ENST00000409511	ENSG00000153563	CD8A	0	0	0.003658	0	0	0	0	0	0.002364
ENST00000545180	ENSG00000176170	SPHK1	0	0	0.003652	0	0	0	0	0	0
ENST00000432128	ENSG00000158856	DMTN	0	0	0.003589	0	0	0	0	0	0
ENST00000436483	ENSG00000073737	DHRS9	0	0	0.003563	0	0	0	0	0	0
ENST00000392585	ENSG00000183484	GPR132	0	0	0.003529	0	0	0	0	0	0
ENST00000261336	ENSG00000126838	PZP	0	0	0.003476	0	0	0	0	0	0
ENST00000298050	ENSG00000165325	DEUP1	0	0	0.003469	0	0	0	0	0	0
ENST00000264651	ENSG00000167916	KRT24	0	0	0.003364	0	0	0	0	0	0
ENST00000426426	ENSG00000224982	TMEM233	0	0	0.00333	0	0	0	0	0	0
ENST00000370684	ENSG00000142875	PRKACB	0	0	0.003298	0	0	0	0	0	0
ENST00000624995	ENSG00000143554	SLC27A3	0.000406	0.001019	0.003291	0.000289	0.000684	0	0	0	0
ENST00000637645	ENSG00000283267	FAM237B	0	0	0.003268	0	0	0	0	0	0
ENST00000361886	ENSG00000184599	FAM19A3	0	0	0.003265	0	0	0	0	0	0
ENST00000399516	ENSG00000053747	LAMA3	0	0	0.003255	0	0	0	0	0	0
ENST00000372711	ENSG00000156650	KAT6B	0	0	0.003233	0	0	0	0	0	0
ENST00000645407	ENSG00000100150	DEPDC5	0	0	0.00319	0	0	0	0	0	0.001363
ENST00000403750	ENSG00000155846	PPARGC1B	0	0	0.003189	0	0	0	0	0	0
ENST00000551451	ENSG00000064763	FAR2	0	0	0.003187	0	0	0	0	0	0
ENST00000409027	ENSG00000151689	INPP1	0	0	0.003173	0	0	0	0	0	0
ENST00000436038	ENSG00000197448	GSTK1	0	0	0.003133	0	0	0	0	0	0
ENST00000357525	ENSG00000198523	PLN	0	0	0.003071	0	0	0	0	0	0
ENST00000335110	ENSG00000196159	FAT4	0.000577	0	0.003033	0	0	0	0.000674	0	1.5e-05
ENST00000529167	ENSG00000183644	C11orf88	0	0	0.002982	0	0	0	0	0	0.001679
ENST00000358763	ENSG00000185666	SYN3	0	0.000139	0.002956	0	0	0	0	0	0
ENST00000641430	ENSG00000109339	MAPK10	0	0	0.002923	0	0	0	0	0	0
ENST00000454909	ENSG00000182568	SATB1	0	0	0.002922	0	0	0	0	0	0
ENST00000475289	ENSG00000170989	S1PR1	0	0	0.002874	0	0	0	0	0	0
ENST00000330523	ENSG00000182931	WFDC10B	0	0	0.002836	0	0	0	0	0	0
ENST00000531145	ENSG00000205177	C11orf91	0	0	0.002752	0	0	0	0	0	0
ENST00000240361	ENSG00000121101	TEX14	0	0	0.002748	0	0	0	0	0	0.00083
ENST00000422769	ENSG00000154001	PPP2R5E	0	0	0.002737	0	0	0	0	0	0
ENST00000354959	ENSG00000198521	ZNF43	0	0	0.002716	0	0	0	0	0	0
ENST00000439363	ENSG00000070785	EIF2B3	8e-06	0.000117	0.002715	0.000187	0	1.6e-05	0.000165	1.6e-05	6.6e-05
ENST00000502653	ENSG00000018189	RUFY3	0.001203	0	0.002712	0	0.000741	7.4e-05	0.00072	7.4e-05	0
ENST00000252050	ENSG00000112659	CUL9	0	0	0.002631	0	0	0.002807	0	0.002807	0
ENST00000225512	ENSG00000108379	WNT3	0	0	0.002624	0	0	0	0	0	0
ENST00000439108	ENSG00000234414	RBMY1A1	0	0	0.00261	0	0	0	0	0	0
ENST00000298545	ENSG00000165695	AK8	0	0	0.002596	0	0	0	0	0	0
ENST00000283635	ENSG00000153563	CD8A	0	0	0.002552	0	0	0	0	0	0
ENST00000389609	ENSG00000181982	CCDC149	0	0	0.002531	0	0	0	0	0	0
ENST00000431380	ENSG00000159674	SPON2	0	0	0.002507	0	0	0	0	0	0
ENST00000429565	ENSG00000223614	ZNF735	0	0	0.002492	0	0	0	0	0	0
ENST00000406174	ENSG00000198517	MAFK	0	0	0.002479	0	0	0	0	0	0
ENST00000502575	ENSG00000113448	PDE4D	0	0	0.002472	0	0	0	0	0	0
ENST00000308611	ENSG00000163606	CD200R1	0	0	0.002454	0	0	0.00197	0	0.00197	0
ENST00000332312	ENSG00000183798	EMILIN3	0	0	0.002438	0	0	0	0.000994	0	0
ENST00000442598	ENSG00000085999	RAD54L	0	0	0.00242	0	0	0	0	0	0
ENST00000301656	ENSG00000171446	KRT27	0	0	0.002408	0	0	0	0	0	0
ENST00000521389	ENSG00000113269	RNF130	0	0	0.002381	0	0	0	0	0	0
ENST00000638759	ENSG00000156113	KCNMA1	0	0	0.002341	0	0	0	0	0	0
ENST00000416121	ENSG00000186094	AGBL4	0	0	0.002315	0	0	0	0	0	0
ENST00000539850	ENSG00000122136	OBP2A	0	0	0.002291	0	0	0	0	0	0
ENST00000378700	ENSG00000172201	ID4	0	0	0.002273	0	0	0	0	0	0
ENST00000409568	ENSG00000183476	SH2D7	0	0	0.002269	0	0	0	0	0	0
ENST00000333850	ENSG00000139287	TPH2	0	0	0.002253	0	0	0	0	0	0
ENST00000450102	ENSG00000183873	SCN5A	0	0.000264	0.002245	0	0	0	0	0	0
ENST00000199280	ENSG00000167580	AQP2	0	0	0.002214	0	0	0	0	0	0
ENST00000394855	ENSG00000140403	DNAJA4	0	0	0.00214	0	0	0	0	0	0
ENST00000454744	ENSG00000185988	PLK5	0	0	0.002123	0	0	0	0	0	0
ENST00000327956	ENSG00000183873	SCN5A	0	0	0.002115	0	0	0	0	0	0
ENST00000403906	ENSG00000167554	ZNF610	0	0	0.002088	0	0	0	0	0	0
ENST00000428870	ENSG00000107077	KDM4C	0	0	0.002021	0	0	0	0.000308	0	0
ENST00000314070	ENSG00000139737	SLAIN1	0	0	0.001994	0	0	0	0	0	0
ENST00000540678	ENSG00000102755	FLT1	0	0	0.001982	0	0	0	0	0	0
ENST00000246784	ENSG00000126453	BCL2L12	0	0.00021	0.001935	0.000256	0.000168	0	0.000699	0	0
ENST00000508116	ENSG00000109452	INPP4B	0	0	0.001919	0	0.001127	0	0	0	0
ENST00000252029	ENSG00000025708	TYMP	0	0	0.001909	0	0	0	0	0	0
ENST00000602917	ENSG00000196312	MFSD14C	0	0	0.001833	0	0	0	0	0	0
ENST00000635776	ENSG00000144285	SCN1A	0	0	0.001829	0	0	0	0	0	0
ENST00000407322	ENSG00000182732	RGS6	0	0	0.001827	0.000191	0	0	0	0	0
ENST00000377899	ENSG00000125851	PCSK2	0	0	0.001807	0	0	0	0	0	0
ENST00000536684	ENSG00000255823	MTRNR2L8	0	0	0.001773	0	0	0	0	0	0
ENST00000524874	ENSG00000165046	LETM2	0	0	0.001768	0	0	0	0.000206	0	0
ENST00000531584	ENSG00000126883	NUP214	0	0	0.001712	0	0	0	0	0	0
ENST00000420470	ENSG00000236699	ARHGEF38	0	0	0.001693	0	0	0.001359	0	0.001359	0
ENST00000327987	ENSG00000174498	IGDCC3	0	0	0.001685	0	0	0	0	0	0
ENST00000488747	ENSG00000213625	LEPROT	0	0	0.001677	0	0	0	0	0	0
ENST00000446947	ENSG00000132405	TBC1D14	7.8e-05	0.00021	0.001672	0.000255	0	0.000486	0.000519	0.000486	0
ENST00000486483	ENSG00000163659	TIPARP	0	0	0.001657	0	0	0	0	0	0
ENST00000398437	ENSG00000160179	ABCG1	0	0	0.001592	0	0	0	0	0	0
ENST00000630638	ENSG00000157036	EXOG	0	0.0001	0.001572	7e-06	0	8.1e-05	8e-06	8.1e-05	0
ENST00000360870	ENSG00000155657	TTN	0	0	0.001522	0	0	0	0	0	0
ENST00000396776	ENSG00000175857	GAPT	0	0	0.001378	0	0	0	0	0	0
ENST00000519851	ENSG00000156011	PSD3	0	0	0.001361	0	0	0	0	0	0
ENST00000401624	ENSG00000100346	CACNA1I	0	0	0.001339	0	0	0	0	0	0
ENST00000639823	ENSG00000156113	KCNMA1	0	0	0.001301	0	0	0	0	0	0
ENST00000256178	ENSG00000133800	LYVE1	0	0	0.001299	0	0	0	0.001193	0	0
ENST00000424654	ENSG00000158528	PPP1R9A	0	0	0.001289	0	0	0	0	0	0
ENST00000413956	ENSG00000197632	SERPINB2	0	0.000205	0.00127	0.000261	0.000445	0	0.000297	0	0.000126
ENST00000429017	ENSG00000175879	HOXD8	0	0	0.001264	0	0	2.5e-05	0	2.5e-05	0
ENST00000402114	ENSG00000068781	STON1-GTF2A1L	0	9e-06	0.001219	0	0	0	0	0	0
ENST00000423258	ENSG00000184465	WDR27	0	0	0.001201	0	0	0	0	0	0
ENST00000641320	ENSG00000181785	OR5AS1	0	0	0.001176	0	0	0	0	0	0
ENST00000514080	ENSG00000205838	TTC23L	0	0	0.001166	0	0	0	0	0	0
ENST00000355522	ENSG00000198535	C2CD4A	0	0	0.001134	0	0	0	0	0	0
ENST00000622892	ENSG00000131467	PSME3	0	0	0.001123	0	9e-06	5e-06	0	5e-06	0
ENST00000379221	ENSG00000120675	DNAJC15	0	0	0.00112	0	0	0	0	0	0
ENST00000393955	ENSG00000173599	PC	0	0	0.00111	0.000238	0	0	3.9e-05	0	0
ENST00000615806	ENSG00000146555	SDK1	0	0	0.00109	0	0	0	0	0	0
ENST00000360524	ENSG00000170160	CCDC144A	0.000108	0	0.001058	0	0	0	0	0	0
ENST00000553489	ENSG00000185482	STAC3	0	0	0.001057	0	0	0	0	0	0
ENST00000397944	ENSG00000118492	ADGB	0	0	0.001029	0	1.4e-05	0	0	0	0
ENST00000445943	ENSG00000128512	DOCK4	0	0	0.000996	0	0	0	0	0	0.00014
ENST00000641673	ENSG00000172324	OR5A2	0	0	0.000978	0	0	0	0	0	0
ENST00000518844	ENSG00000079102	RUNX1T1	0	0	0.000973	0.000336	0	0	0	0	0
ENST00000541662	ENSG00000170667	RASA4B	8e-06	0	0.000941	0	0	0	0	0	0
ENST00000607574	ENSG00000271824	SMIM32	0	0	0.000905	0	0	0	0	0	0
ENST00000371265	ENSG00000162399	BSND	0	0	0.00088	0	0	0	0	0	0
ENST00000534928	ENSG00000147905	ZCCHC7	0	0	0.000877	0	0	0	0	0	0
ENST00000264318	ENSG00000109158	GABRA4	0	0	0.000829	0	0	0	0	0	0
ENST00000409869	ENSG00000075884	ARHGAP15	0	0	0.00082	0	0	0	0	0	0
ENST00000566807	ENSG00000186073	C15orf41	0	0	0.000819	0	0	0	0	0	0
ENST00000305447	ENSG00000168959	GRM5	0	0	0.000784	0	0	0	0	0	0
ENST00000414080	ENSG00000166619	BLCAP	0	0	0.000762	0	0	0	2.4e-05	0	5e-05
ENST00000643940	ENSG00000060709	RIMBP2	0	0	0.000669	0	0	0	0	0	0
ENST00000588123	ENSG00000116044	NFE2L2	0	0	0.000647	0	0	0	0	0	0
ENST00000493736	ENSG00000134243	SORT1	0	0	0.000634	0	0	0	0	0	0
ENST00000619333	ENSG00000099866	MADCAM1	0	0	0.000634	0	0	0	0	0	0
ENST00000506554	ENSG00000081189	MEF2C	0	0	0.000634	0	0	0	0	0	0
ENST00000414083	ENSG00000204209	DAXX	0	0	0.000628	0	0	0	0	0	0
ENST00000649360	ENSG00000122390	NAA60	0	0	0.000609	0	0.000498	0	0	0	0
ENST00000488137	ENSG00000116922	C1orf109	0	0	0.000563	0	0	0	0	0	0
ENST00000440579	ENSG00000142687	KIAA0319L	0	0	0.000497	0	0	0	0	0	0
ENST00000641902	ENSG00000109339	MAPK10	0	0	0.000483	0	0	0	0	0	0
ENST00000496807	ENSG00000188817	SNTN	0	0	0.000483	0	0	0.000462	0	0.000462	0
ENST00000431164	ENSG00000147010	SH3KBP1	0	0	0.000476	0	0	0	0	0	0
ENST00000395258	ENSG00000140488	CELF6	0	0	0.00046	0	0	0	0	0	0
ENST00000343796	ENSG00000113580	NR3C1	0.000139	0	0.000457	2.5e-05	0	6.7e-05	0	6.7e-05	0
ENST00000568791	ENSG00000205336	ADGRG1	0	0	0.000455	0	0	0	0	0	0
ENST00000344191	ENSG00000130396	AFDN	0	0	0.000423	0	0	0	0	0	0
ENST00000587194	ENSG00000134440	NARS	0	0	0.000384	0	0	0	0	0	0
ENST00000433959	ENSG00000154978	VOPP1	0	0	0.000329	0	0	0	0	0	0
ENST00000626700	ENSG00000164815	ORC5	0	0	0.000329	0	0	0	0	0	0
ENST00000616266	ENSG00000269313	MAGIX	0	0	0.000299	0	0	0	0	0	0
ENST00000300797	ENSG00000167371	PRRT2	5.4e-05	9.7e-05	0.000279	2.8e-05	0	2.3e-05	0	2.3e-05	0
ENST00000520871	ENSG00000134013	LOXL2	0	0	0.000276	0	0	0	0	0	0
ENST00000357491	ENSG00000198521	ZNF43	0	0	0.00027	0	0	0	0	0	0
ENST00000620571	ENSG00000257335	MGAM	0	0	0.000242	0	0	0	0	0	0
ENST00000435035	ENSG00000242173	ARHGDIG	0	0	0.000237	0	0	0	0	0	0
ENST00000582463	ENSG00000130255	RPL36	0	0	0.000221	0	0	0	0	0	0
ENST00000569250	ENSG00000125170	DOK4	0	0	0.000208	0	0	0	0	0	0
ENST00000534206	ENSG00000078124	ACER3	6.9e-05	8e-06	0.00019	3e-06	9e-06	5e-06	8.9e-05	5e-06	2.5e-05
ENST00000338791	ENSG00000106348	IMPDH1	0	0	0.000182	0	0	0	0	0	0
ENST00000520755	ENSG00000175324	LSM1	0.000108	0	0.000178	0	0	2e-06	5.5e-05	2e-06	2e-06
ENST00000638575	ENSG00000156113	KCNMA1	0	0	0.000172	0	0	0	0	0	0
ENST00000622668	ENSG00000048052	HDAC9	0	0	0.000139	0	0	0	0	0	0
ENST00000538371	ENSG00000132000	PODNL1	0	0	0.000133	0	0	0	0	0	0
ENST00000533703	ENSG00000166801	FAM111A	0	1e-06	0.000127	0	1.1e-05	0	2e-06	0	6.1e-05
ENST00000614697	ENSG00000198081	ZBTB14	0	0	0.00012	0	0	0	0	0	0
ENST00000359161	ENSG00000087903	RFX2	0	0	0.00012	0	0	0	0	0	0
ENST00000428307	ENSG00000048052	HDAC9	0	0	9.8e-05	0	0	0	0	0	0
ENST00000287913	ENSG00000139908	TSSK4	0	0	7.8e-05	0	0	0	0	0	0
ENST00000616641	ENSG00000164093	PITX2	0	0	7.1e-05	0	0	0	0	0	0
ENST00000496972	ENSG00000138101	DTNB	0	0	6.5e-05	0	0	0	0	0	0
ENST00000546141	ENSG00000111087	GLI1	0	0	6.3e-05	0	0	0	0	0	0
ENST00000612750	ENSG00000164934	DCAF13	0	4e-06	5.9e-05	1e-06	1e-06	3e-06	0	3e-06	0
ENST00000626210	ENSG00000113407	TARS	0	0	4.8e-05	0	0	0	2.6e-05	0	0
ENST00000614329	ENSG00000270629	NBPF14	0	0	4.7e-05	0	0	0	0	0	0
ENST00000341290	ENSG00000187642	PERM1	0	0	1.8e-05	0	0	0	0	0	0
ENST00000569154	ENSG00000205336	ADGRG1	0	0	1.6e-05	0	0	9e-06	0	9e-06	0
ENST00000592298	ENSG00000188321	ZNF559	1e-06	0	9e-06	0	3e-06	0	0	0	0
ENST00000273588	ENSG00000145020	AMT	0	0	8e-06	0	0	0	0	0	0
ENST00000585377	ENSG00000188321	ZNF559	1e-06	0	8e-06	0	1e-06	0	4e-06	0	0
ENST00000643774	ENSG00000136104	RNASEH2B	0	0	6e-06	0	0	0	0	0	0
ENST00000611702	ENSG00000273136	NBPF26	0	0	5e-06	0	3e-06	0	0	0	0
ENST00000598774	ENSG00000134769	DTNA	0	0	4e-06	0	0	0	0	0	0
ENST00000505990	ENSG00000145349	CAMK2D	0	0	2e-06	0	0	0	0	0	0
ENST00000306145	ENSG00000187954	CYHR1	0	0	1e-06	0	0	0	0	0	0

## Sheet: mRNA_UV_cluster 4
transcript_id	gene_id	gene_name	C_0	UV_3	UV_6	UV_9	UV_12	UV_24	UV_48	UV_24	UV_96
ENST00000456586	ENSG00000197756	RPL37A	0	0	0	0	0	55.2142	0	55.2142	0
ENST00000537526	ENSG00000124422	USP22	0	0.000717	0.003245	0.001169	0.004672	51.0964	0	51.0964	0.001677
ENST00000552370	ENSG00000139644	TMBIM6	0.169038	0.007042	0.012176	6.32036	0.011124	44.786	0.006527	44.786	0.005994
ENST00000566397	ENSG00000205937	RNPS1	0.085373	0.024	0.054972	0.041096	0.05009	36.7313	0.026323	36.7313	0.071986
ENST00000358598	ENSG00000108946	PRKAR1A	5.82399	1.24403	1.56617	1.82259	1.46844	32.3116	1.22701	32.3116	0.568982
ENST00000266027	ENSG00000114353	GNAI2	0	0	0	0	0	29.2132	0	29.2132	0
ENST00000617962	ENSG00000116717	GADD45A	0	0	0	0	0	25.2566	0	25.2566	4.26526
ENST00000650309	ENSG00000131174	COX7B	0.029458	0.025633	0.02393	0.000464	0.025802	22.6922	0.024778	22.6922	0.050143
ENST00000548160	ENSG00000135404	CD63	0.521283	0.851983	1.35192	0.851434	0.848917	22.6693	1.26986	22.6693	1.11069
ENST00000649435	ENSG00000180398	MCFD2	0	0	0	0	0	18.3663	0	18.3663	0
ENST00000432458	ENSG00000144635	DYNC1LI1	0.427906	0.228648	5.27293	0.257759	0.421956	14.5126	0	14.5126	0
ENST00000361690	ENSG00000096063	SRPK1	0.003127	0	2.66336	0	0.15056	12.6928	0	12.6928	0
ENST00000646036	ENSG00000027697	IFNGR1	0	0.001546	0	0	1.06183	12.2312	0	12.2312	0
ENST00000584860	ENSG00000161960	EIF4A1	0.143327	0.717232	0.657026	0.384213	1.05476	10.9494	0.460625	10.9494	0.216084
ENST00000622530	ENSG00000124228	DDX27	0.030858	0.001103	0.062191	0.03511	0.000839	9.92184	0.015402	9.92184	1.15669
ENST00000456325	ENSG00000143569	UBAP2L	0.36055	0.03759	0.416284	0.534527	1.15884	9.75518	0.40629	9.75518	0.21774
ENST00000265637	ENSG00000110075	PPP6R3	0.18742	0.119661	0.065213	0.153098	0.289137	9.70806	0.204975	9.70806	0.159268
ENST00000375695	ENSG00000179222	MAGED1	0.011296	0.070683	0.647182	0.101196	0.001123	8.7323	0.028275	8.7323	1.01995
ENST00000389054	ENSG00000131504	DIAPH1	2e-06	0	1.83215	0	0	8.2077	0	8.2077	1.5905
ENST00000308664	ENSG00000174437	ATP2A2	0.108365	0.10502	0.033517	0.096371	0.02995	6.73987	0.068736	6.73987	1.5675
ENST00000333234	ENSG00000141428	C18orf21	0.267588	0.247764	0.263262	0.207497	0.160446	6.2598	1.14455	6.2598	0.170263
ENST00000434835	ENSG00000174579	MSL2	0.010072	0.020432	0.013617	0.006227	0.009802	5.86326	0.008397	5.86326	0.39803
ENST00000380764	ENSG00000124535	WRNIP1	4e-06	1.94128	2e-06	1e-06	2e-06	5.80669	0	5.80669	1e-06
ENST00000510664	ENSG00000113328	CCNG1	0	0	0	0	0	5.65654	0	5.65654	0
ENST00000635846	ENSG00000134371	CDC73	0	0	0	0	0	5.45181	0	5.45181	0.313746
ENST00000406768	ENSG00000080815	PSEN1	0.016897	0	0	0	0.002784	5.41018	0.003453	5.41018	0.014501
ENST00000312280	ENSG00000109099	PMP22	0	0	0	0	0	5.19463	0	5.19463	0
ENST00000412850	ENSG00000068745	IP6K2	0.177849	0.082394	0.118518	0.135817	0.360702	4.97043	0.23472	4.97043	0.028679
ENST00000426039	ENSG00000139998	RAB15	0	0	0	0	0	4.85323	0	4.85323	0
ENST00000642746	ENSG00000010278	CD9	0	0	0	0	0.180462	4.82546	0	4.82546	0
ENST00000600706	ENSG00000142230	SAE1	0.101922	0.070475	0.230913	0.047644	0.064838	4.33662	0.012595	4.33662	0.070502
ENST00000518125	ENSG00000156795	WDYHV1	0	0	0	0.131816	0	4.16856	0	4.16856	0
ENST00000216350	ENSG00000100462	PRMT5	0	0	0	0.252711	0	3.87667	0.210761	3.87667	0.19781
ENST00000380172	ENSG00000099810	MTAP	0.063685	0.050883	0.018144	0.000763	0.005962	3.78224	0.067457	3.78224	0.042503
ENST00000642714	ENSG00000130703	OSBPL2	0	0	0.000427	0.005578	0	3.56862	0	3.56862	0.013631
ENST00000518041	ENSG00000168802	CHTF8	0	0	0	1.48742	0	3.55687	0	3.55687	0
ENST00000409267	ENSG00000134222	PSRC1	0	0.543998	0.023929	0.008748	0.090975	3.49146	0.134986	3.49146	0.108905
ENST00000397226	ENSG00000218739	CEBPZOS	0.007202	0.009119	0.138497	0.004994	0.007761	3.46342	0.134134	3.46342	0.326506
ENST00000618970	ENSG00000249915	PDCD6	0	0	0	0.873032	0	3.13626	0	3.13626	0
ENST00000591241	ENSG00000173581	CCDC106	0.119102	0.06347	0	0.085013	0.114725	2.82636	0.099859	2.82636	0.037136
ENST00000616406	ENSG00000108219	TSPAN14	0	0	0.058029	0.061711	0.085672	2.81715	0.031038	2.81715	0.046849
ENST00000306481	ENSG00000168944	CEP120	0.001546	0	0	0	0.206914	2.77261	0.151064	2.77261	0.242878
ENST00000533553	ENSG00000122203	KIAA1191	0.000768	0.001341	0.000669	1.15186	0.001643	2.73671	0.000709	2.73671	0.000926
ENST00000648476	ENSG00000127955	GNAI1	0.000425	0	0	0	0	2.68106	0	2.68106	0
ENST00000452935	ENSG00000119787	ATL2	0.025158	0.014329	0.014886	0.030606	0.013717	2.62589	0.021823	2.62589	0.010766
ENST00000371708	ENSG00000112759	SLC29A1	0.080626	0.042907	0.066603	0.046138	0.072204	2.55988	0.07716	2.55988	0.054535
ENST00000539170	ENSG00000139112	GABARAPL1	0	0	0	0	0	2.54361	0	2.54361	0
ENST00000429587	ENSG00000130921	C12orf65	0.195075	0.153096	0.041452	0.020497	0.026249	2.48913	0.164195	2.48913	0.091278
ENST00000592996	ENSG00000173581	CCDC106	0	0	0	0	0	2.43452	0	2.43452	0
ENST00000518483	ENSG00000174371	EXO1	0	0	0	0.981524	0	2.41309	0	2.41309	0
ENST00000557795	ENSG00000090487	SPG21	0.098575	0.147888	0.100154	0	0.0317	2.40847	0.175277	2.40847	0.171776
ENST00000539697	ENSG00000162819	BROX	0.046264	0.033981	0	0.041965	0	2.28491	0.036762	2.28491	0.039743
ENST00000344749	ENSG00000071564	TCF3	0.090968	0.00275	0	0.038243	0.012616	2.12102	0.036296	2.12102	0.006898
ENST00000534140	ENSG00000019144	PHLDB1	0.411793	0.007978	0.028827	0	0.027017	2.09744	0.01156	2.09744	0.007266
ENST00000393001	ENSG00000144233	AMMECR1L	0.000918	0	0.787333	0	0	2.08379	0.000693	2.08379	0
ENST00000416541	ENSG00000188807	TMEM201	0	0	0	0	0	2.05416	0	2.05416	0.690855
ENST00000409136	ENSG00000138434	ITPRID2	0.003017	0.00104	0.003779	0.000823	0.00102	1.98836	0.003606	1.98836	0.00709
ENST00000390667	ENSG00000136122	BORA	0.00189	0.055083	0.002224	0.301263	0.06313	1.96565	7.4e-05	1.96565	0.023792
ENST00000585452	ENSG00000173786	CNP	0	0.249384	0.197232	0	0	1.90955	0	1.90955	0
ENST00000389879	ENSG00000090061	CCNK	0.212212	0.047378	0.02044	0.008522	0.253656	1.89365	0.062224	1.89365	0.031863
ENST00000576052	ENSG00000185624	P4HB	0.136614	0.104825	0.091437	0.057238	0.062317	1.88823	0.086902	1.88823	0.09475
ENST00000622645	ENSG00000141510	TP53	0	0.025089	0.048575	0	0	1.85972	0.003555	1.85972	0.032787
ENST00000645071	ENSG00000136869	TLR4	0.02616	0.045532	0.029904	0.025215	0.059709	1.84618	0.063269	1.84618	0.037337
ENST00000602291	ENSG00000170035	UBE2E3	0.091154	0.000685	0.00031	0.068597	0.001188	1.80894	0.047453	1.80894	0.00015
ENST00000263409	ENSG00000113594	LIFR	0.480462	0.000851	0	0.000539	0	1.74407	0	1.74407	0
ENST00000429746	ENSG00000117984	CTSD	0.05528	0	0.04423	0.022015	0.182481	1.72174	0.069281	1.72174	0.032392
ENST00000356654	ENSG00000111676	ATN1	0	0	0	0	0	1.61487	0	1.61487	0
ENST00000393104	ENSG00000150593	PDCD4	0.022438	0.021315	0.021764	0.009078	0.204969	1.58737	0.20019	1.58737	0.015018
ENST00000471181	ENSG00000012048	BRCA1	0	0.09042	0.00028	0.000417	0.002379	1.58587	0.025176	1.58587	0
ENST00000535795	ENSG00000105676	ARMC6	0.123523	0.077761	0.0266	0.094586	0.029147	1.57771	0.03235	1.57771	0.024161
ENST00000328236	ENSG00000168944	CEP120	0	0	0.117727	0	0	1.54916	0	1.54916	0.303004
ENST00000409402	ENSG00000134278	SPIRE1	0.014374	0.013168	0.009481	0.141529	0.000549	1.48994	0.009556	1.48994	0.004239
ENST00000554691	ENSG00000100731	PCNX1	0.071631	0	0.335837	0	0	1.48155	0.063789	1.48155	0.049587
ENST00000420246	ENSG00000141510	TP53	0	0.034733	0.072833	0	0	1.47291	0.004302	1.47291	0.056224
ENST00000548041	ENSG00000062485	CS	0	0.015639	0	0	0.017931	1.46424	0	1.46424	0
ENST00000447485	ENSG00000182220	ATP6AP2	0	0	0	0	0	1.45584	0	1.45584	0
ENST00000622898	ENSG00000047579	DTNBP1	0.312611	0	0	0.192602	0	1.40353	0	1.40353	0
ENST00000587703	ENSG00000175354	PTPN2	0	0	0	0	0	1.39626	0	1.39626	0
ENST00000430077	ENSG00000130821	SLC6A8	0	0	0	0	0.00172	1.38329	0.00779	1.38329	0.006127
ENST00000621093	ENSG00000285437	POLR2J3	0.112017	0	0	0	0.188843	1.34189	0.192588	1.34189	0.0237
ENST00000342104	ENSG00000142794	NBPF3	0.007912	0.04747	0	0.01029	0	1.32591	0.037404	1.32591	0.008242
ENST00000304267	ENSG00000065665	SEC61A2	0	0	0	0.010533	0.042796	1.32212	0.011358	1.32212	0
ENST00000643318	ENSG00000073584	SMARCE1	0	0	0	0	0.000113	1.29547	0	1.29547	0
ENST00000360843	ENSG00000198586	TLK1	0	0	0.000443	0	0.001748	1.29002	0	1.29002	0
ENST00000424608	ENSG00000104805	NUCB1	0	0	0	0	0	1.27743	0	1.27743	0
ENST00000314289	ENSG00000063978	RNF4	0	0	0	0.338353	0	1.26283	0	1.26283	0
ENST00000451692	ENSG00000147050	KDM6A	0.026645	6e-05	0.015329	0	0.1298	1.22635	0.000488	1.22635	0.001144
ENST00000636577	ENSG00000104763	ASAH1	0	0	0	0	0	1.17073	0	1.17073	0
ENST00000459747	ENSG00000152601	MBNL1	0	0	0	0	0	1.15267	0	1.15267	0
ENST00000576722	ENSG00000174238	PITPNA	0.122448	0.152748	0	0	0.019309	1.14002	0	1.14002	0
ENST00000275569	ENSG00000146707	POMZP3	0	0	0	0	0.440533	1.13894	0	1.13894	0
ENST00000453663	ENSG00000196141	SPATS2L	0	0	0	0	0	1.12342	0	1.12342	0
ENST00000375779	ENSG00000213719	CLIC1	0	0	0	0	0	1.10614	0	1.10614	0.000594
ENST00000376673	ENSG00000139793	MBNL2	0	0	0	0	0	1.10205	0	1.10205	0
ENST00000535915	ENSG00000130164	LDLR	0.160827	0.007925	0.127169	0	0	1.08685	0.002892	1.08685	0.016443
ENST00000535033	ENSG00000134548	SPX	0.017946	0.032564	0.0661	0.0543	0.01798	1.04835	0.035164	1.04835	0.013968
ENST00000547925	ENSG00000170473	PYM1	0	0.001371	0.001235	0	0.006699	1.04598	0.218599	1.04598	0.070903
ENST00000568682	ENSG00000065427	KARS	0.000137	0.106287	6.6e-05	0	0.041896	1.04573	0.00741	1.04573	0.046967
ENST00000615843	ENSG00000021574	SPAST	0.014553	0.000431	0.116085	0.000133	0.000535	1.04459	0	1.04459	0.00106
ENST00000367512	ENSG00000116406	EDEM3	0.000927	0.000274	0.000154	0	0.000203	1.01882	0	1.01882	0.000908
ENST00000572942	ENSG00000122390	NAA60	0	0	0	0	0.069326	0.991532	0	0.991532	0
ENST00000541297	ENSG00000104853	CLPTM1	0.009107	0.003594	0	0.014539	0.020179	0.985445	0.03707	0.985445	0
ENST00000602162	ENSG00000213020	ZNF611	0	0	0	0	0	0.953219	0	0.953219	0
ENST00000446818	ENSG00000131374	TBC1D5	0.045076	0.003049	0.013727	0	0	0.933205	0	0.933205	0.017478
ENST00000533873	ENSG00000078124	ACER3	0.062944	0	0.061162	0.08198	0	0.917514	0.046016	0.917514	0.017373
ENST00000599910	ENSG00000011451	WIZ	0.009922	0.015031	0.004875	0.009275	0.016505	0.907381	0.014462	0.907381	0.003261
ENST00000447932	ENSG00000157800	SLC37A3	0	0	0	0	0	0.904126	0	0.904126	0
ENST00000300843	ENSG00000007047	MARK4	0.000403	0	0.263407	0	0	0.900255	0.000651	0.900255	0.001163
ENST00000453973	ENSG00000042493	CAPG	0	0	0	0	0	0.885725	0	0.885725	0
ENST00000506585	ENSG00000165259	HDX	0	0	0	0	0	0.884629	0	0.884629	0
ENST00000443119	ENSG00000260537	AC012184.2	0	0	0	0	0	0.878334	0	0.878334	0
ENST00000561617	ENSG00000166140	ZFYVE19	0	0	0	0	0	0.866905	0	0.866905	0.010428
ENST00000514514	ENSG00000172239	PAIP1	0	0	0	0	0	0.839251	0	0.839251	0
ENST00000398389	ENSG00000161647	MPP3	0	0	0	0	0	0.794219	0	0.794219	0
ENST00000458726	ENSG00000182158	CREB3L2	0	0	0.005977	0	0.003942	0.792622	0	0.792622	0.004973
ENST00000471138	ENSG00000169379	ARL13B	0	0	0	0	0	0.769444	0	0.769444	0
ENST00000553586	ENSG00000100577	GSTZ1	0	0	0	0	0	0.755931	0	0.755931	0
ENST00000415447	ENSG00000100280	AP1B1	0	0	0	0	0	0.744112	0	0.744112	0
ENST00000618621	ENSG00000145012	LPP	0.293054	0	0	0	0	0.72756	0.006427	0.72756	0
ENST00000392465	ENSG00000170633	RNF34	0	0.001375	0.001606	0	0	0.696651	0	0.696651	0.008543
ENST00000297183	ENSG00000131503	ANKHD1	0.011178	0.198893	0.002746	0	0	0.69284	0.006874	0.69284	0.001028
ENST00000644513	ENSG00000215301	DDX3X	0	0.023398	0.015501	0.017222	0.025215	0.692657	0.018985	0.692657	0.056357
ENST00000598744	ENSG00000131845	ZNF304	0	0	0.105935	0.084006	0.013179	0.686828	0	0.686828	0
ENST00000593875	ENSG00000181027	FKRP	0	0	0	0	0	0.67154	0.038686	0.67154	0
ENST00000327397	ENSG00000103335	PIEZO1	0	0	0	0	0	0.652732	0	0.652732	0
ENST00000451251	ENSG00000171163	ZNF692	0	0	0	0.12394	0	0.644068	0	0.644068	0
ENST00000471804	ENSG00000204852	TCTN1	0	0	0.050031	0	0	0.64094	0.079388	0.64094	0.036651
ENST00000645515	ENSG00000105929	ATP6V0A4	0.081804	0	0.066058	0.000983	0	0.624712	0	0.624712	0.022282
ENST00000435316	ENSG00000144591	GMPPA	0	0	0	0	0	0.622007	0	0.622007	0
ENST00000462320	ENSG00000169599	NFU1	0.001412	0	0	0	0	0.61385	0	0.61385	0
ENST00000409938	ENSG00000116106	EPHA4	0	0	0	0	0	0.591841	0	0.591841	0
ENST00000393441	ENSG00000166167	BTRC	0	0	0	0	0.005475	0.580366	0.222322	0.580366	0
ENST00000542973	ENSG00000089094	KDM2B	0	0	0	0	0	0.577951	0	0.577951	0
ENST00000614878	ENSG00000198720	ANKRD13B	0	0	0	0.071105	0	0.555324	0	0.555324	0
ENST00000554018	ENSG00000182400	TRAPPC6B	0	0	0	0	0	0.537685	0	0.537685	0
ENST00000637156	ENSG00000182372	CLN8	0	0	0	0	8.9e-05	0.537055	4.2e-05	0.537055	0
ENST00000579434	ENSG00000101751	POLI	0	0.041386	0	0	0	0.514202	0	0.514202	0
ENST00000421516	ENSG00000172936	MYD88	0	0	0	0	0	0.507662	0	0.507662	0
ENST00000566785	ENSG00000140854	KATNB1	0.02121	0.004342	0.011287	0.006238	0.005762	0.490212	0.090107	0.490212	0.018729
ENST00000596536	ENSG00000130475	FCHO1	0	0	0	0.189984	0	0.473202	0	0.473202	0
ENST00000376713	ENSG00000106772	PRUNE2	0.006121	0	0	0.008973	0	0.470543	0	0.470543	0.011746
ENST00000367286	ENSG00000176393	RNPEP	1e-06	3e-06	0.000159	2e-06	1e-06	0.468512	0.000185	0.468512	0
ENST00000452085	ENSG00000111817	DSE	0.000183	0	0.002334	0.000264	0.002157	0.463917	4.2e-05	0.463917	0
ENST00000521916	ENSG00000102878	HSF4	0	0	0.026345	0	0.021258	0.460945	0	0.460945	0.029231
ENST00000369555	ENSG00000163349	HIPK1	0	0	0	0	0	0.450441	0	0.450441	0
ENST00000258148	ENSG00000135679	MDM2	0	0	0	0	0	0.443034	0	0.443034	0.16466
ENST00000409103	ENSG00000108825	PTGES3L-AARSD1	0	0	0	0	0	0.442084	0	0.442084	0
ENST00000380059	ENSG00000088836	SLC4A11	0.033453	0	0.02747	0.020917	0.031257	0.441035	0.035764	0.441035	0.016937
ENST00000370842	ENSG00000171307	ZDHHC16	0.012298	0.008785	0.004231	0.008079	0.001524	0.429677	0.012242	0.429677	0.028491
ENST00000421641	ENSG00000162613	FUBP1	0.000566	0.002467	0.001192	0.001749	0.001653	0.426289	0.013076	0.426289	0.017188
ENST00000271636	ENSG00000143375	CGN	0.029352	0	0	0.002345	0	0.414485	0	0.414485	0
ENST00000555530	ENSG00000100462	PRMT5	0	0.066434	0	0	0	0.41392	0	0.41392	0
ENST00000639531	ENSG00000120071	KANSL1	0.022631	0.017443	0	0	0.015215	0.40426	0.021667	0.40426	0.012449
ENST00000593337	ENSG00000126456	IRF3	0	0	0	0.117365	0	0.402771	0	0.402771	0
ENST00000613071	ENSG00000180190	TDRP	0	0	0	0	0	0.398292	0	0.398292	0
ENST00000546457	ENSG00000135404	CD63	0.114572	0	0	0	0	0.396947	0	0.396947	0
ENST00000482469	ENSG00000197093	GAL3ST4	0	0	0	0	0	0.391439	0.015206	0.391439	0
ENST00000644969	ENSG00000157764	BRAF	0	0	0	0	0	0.387868	0	0.387868	0
ENST00000532449	ENSG00000149554	CHEK1	0	0	0.101894	0	0	0.380654	0	0.380654	0
ENST00000450491	ENSG00000064012	CASP8	0	0	0	0	0	0.375277	0	0.375277	0
ENST00000547586	ENSG00000139531	SUOX	0	0	0	0	0	0.370834	0	0.370834	0
ENST00000570248	ENSG00000103034	NDRG4	0	0	0	0	0	0.370567	0	0.370567	0
ENST00000507564	ENSG00000163913	IFT122	0	0	0.021428	0	0	0.369314	0.00171	0.369314	0
ENST00000397668	ENSG00000095066	HOOK2	0.00266	0.067559	0.000813	0	0.000865	0.357936	0.000772	0.357936	0.017056
ENST00000356738	ENSG00000113108	APBB3	0	0	0	0	0	0.34855	0	0.34855	0
ENST00000375259	ENSG00000130958	SLC35D2	0	0	0	0	0	0.343385	0	0.343385	0
ENST00000535346	ENSG00000073670	ADAM11	0	0	0	0.003428	0.008854	0.34113	0.005282	0.34113	0.003367
ENST00000548750	ENSG00000087470	DNM1L	0	0.085677	0.062169	0	0	0.337512	0	0.337512	0
ENST00000292808	ENSG00000161204	ABCF3	0	0	0	0	0	0.329867	0	0.329867	0
ENST00000446699	ENSG00000086232	EIF2AK1	0.003942	0.004218	0.005667	0.003581	0.011172	0.327502	0.005827	0.327502	0.002512
ENST00000531253	ENSG00000196535	MYO18A	0	0.01685	0.023089	0	0	0.322643	0.055329	0.322643	0.016613
ENST00000366918	ENSG00000116141	MARK1	0.039244	0	0	0	0.102678	0.316495	0	0.316495	0
ENST00000456050	ENSG00000074582	BCS1L	0	0	0	0	0	0.315785	0	0.315785	0
ENST00000449811	ENSG00000149532	CPSF7	0	0	0	0	0	0.302216	0	0.302216	0
ENST00000600634	ENSG00000204514	ZNF814	0	0.003584	0.002303	0.00072	0.000183	0.298656	0.003016	0.298656	0.003848
ENST00000536370	ENSG00000111837	MAK	0.129426	0.000143	0	0	0	0.28795	0	0.28795	0
ENST00000449524	ENSG00000176393	RNPEP	0	0.070679	0	0	0	0.280728	0	0.280728	0
ENST00000564241	ENSG00000166454	ATMIN	0	0	0	0.116797	0	0.27696	0	0.27696	0
ENST00000530357	ENSG00000133794	ARNTL	0	0	0	0	0	0.27484	0	0.27484	0
ENST00000600434	ENSG00000130312	MRPL34	0	0	0	0	0	0.27134	0.002139	0.27134	0
ENST00000418688	ENSG00000057608	GDI2	0	0	0	0	0.076004	0.268554	0	0.268554	0
ENST00000647811	ENSG00000132424	PNISR	0	0.091227	0	0	0	0.25574	0	0.25574	0
ENST00000649084	ENSG00000185513	L3MBTL1	0	0	0	0	0	0.255366	0.062859	0.255366	0
ENST00000369653	ENSG00000102178	UBL4A	0	0	0	0	0	0.252369	0	0.252369	0
ENST00000373287	ENSG00000006607	FARP2	0	0.018377	0.01926	0	0	0.251013	0	0.251013	0
ENST00000471709	ENSG00000114098	ARMC8	0.027961	0.002651	0	0.003359	0	0.246823	0.035542	0.246823	0.004878
ENST00000392000	ENSG00000124831	LRRFIP1	0.096448	0	0	0	0	0.244404	0	0.244404	0
ENST00000547082	ENSG00000181929	PRKAG1	0	0	0	0	0	0.242735	0	0.242735	0
ENST00000586703	ENSG00000064547	LPAR2	0	0	0	0	0	0.242461	0	0.242461	0.000583
ENST00000585234	ENSG00000101745	ANKRD12	0	0.021551	0	0.028497	0	0.2399	0	0.2399	0.008726
ENST00000611392	ENSG00000283201	AC092329.3	0	0	0	0	0	0.239228	0	0.239228	0
ENST00000378721	ENSG00000164402	2021-09-08	0.004573	0	0	0	0.060485	0.237414	0	0.237414	0
ENST00000520267	ENSG00000197467	COL13A1	0	0	0	0	0.002905	0.236332	0	0.236332	0
ENST00000546600	ENSG00000061987	MON2	0.063865	0	0	0	0	0.231946	0	0.231946	0.021496
ENST00000396165	ENSG00000150527	MIA2	0	0	0	0.004662	0.048318	0.228277	0.002888	0.228277	0.004906
ENST00000394839	ENSG00000142875	PRKACB	0	0	0	0	0	0.22327	0	0.22327	0
ENST00000561267	ENSG00000092439	TRPM7	0	0	0	0	0	0.220764	0	0.220764	0
ENST00000610600	ENSG00000277149	TYW1B	0	0	0.097179	0	0	0.220115	0	0.220115	0
ENST00000626993	ENSG00000163349	HIPK1	0	0	0	0	0	0.217062	0	0.217062	0
ENST00000353868	ENSG00000106459	NRF1	0	0	0.000207	0.03769	0	0.215527	0.035585	0.215527	0.000874
ENST00000514748	ENSG00000181381	DDX60L	0	0	0	0	0	0.214329	0.010097	0.214329	0.007769
ENST00000394510	ENSG00000170776	AKAP13	0.008149	0.006801	0.016285	0	0	0.206965	0.007027	0.206965	0.003392
ENST00000355995	ENSG00000148737	TCF7L2	0	0	0.000145	0.011553	0.020561	0.206566	0	0.206566	0.005315
ENST00000519837	ENSG00000164754	RAD21	0	0	0	0	0	0.205568	0	0.205568	0
ENST00000560509	ENSG00000197299	BLM	0	0	0	0	0	0.203436	0	0.203436	0
ENST00000520733	ENSG00000147679	UTP23	0	0	0	0.061047	0	0.20178	0	0.20178	0
ENST00000409894	ENSG00000125630	POLR1B	0	0	0	0	0	0.201176	0	0.201176	0
ENST00000431234	ENSG00000156261	CCT8	0	0	0	0	0	0.197799	0	0.197799	0
ENST00000630961	ENSG00000164011	ZNF691	0	0	0	0	0	0.195994	0	0.195994	0
ENST00000470736	ENSG00000130939	UBE4B	0	0	0	0	0	0.195891	0	0.195891	0
ENST00000620463	ENSG00000164692	COL1A2	0	0	0	0	0	0.19401	0	0.19401	0
ENST00000413688	ENSG00000001631	KRIT1	0.005407	0	0.003253	0.00265	0.006039	0.19298	0.011328	0.19298	0.002835
ENST00000452543	ENSG00000100401	RANGAP1	0	0	0	0	0	0.184043	0	0.184043	0
ENST00000452226	ENSG00000120913	PDLIM2	0	0	0	0	0	0.182373	0	0.182373	0
ENST00000620239	ENSG00000135114	OASL	0	0	0	0	0	0.180683	0	0.180683	0
TCONS_00000618	XLOC_000449	XLOC_000449	0.049089	0	0	0	0.030039	0.180381	0	0.180381	0
ENST00000452111	ENSG00000040531	CTNS	0.004505	0.000282	0.000146	0.000363	0.00013	0.180332	0.00061	0.180332	0.001607
ENST00000551063	ENSG00000110844	PRPF40B	0	0	0.007224	0.00346	0.00582	0.179812	0	0.179812	0
ENST00000450023	ENSG00000119013	NDUFB3	0	0	0.006734	0.034007	0.032123	0.179609	0	0.179609	0
ENST00000612535	ENSG00000271605	MILR1	0	0	0	0	0	0.179583	0	0.179583	0
ENST00000454502	ENSG00000154743	TSEN2	0	0	0	0.039032	0	0.175157	0	0.175157	0
ENST00000264441	ENSG00000116005	PCYOX1	0	0	0	0	0	0.174997	0	0.174997	0
ENST00000354744	ENSG00000137872	SEMA6D	0	0	0	0	0	0.174225	0	0.174225	0
ENST00000552570	ENSG00000111077	TNS2	0	0	0	0	0	0.168931	0	0.168931	0
ENST00000514924	ENSG00000154277	UCHL1	0	0	0	0.009351	0	0.167246	0	0.167246	0.005923
ENST00000645458	ENSG00000060718	COL11A1	0	0	0.0541	0.014381	0	0.165569	0	0.165569	0
ENST00000510934	ENSG00000078140	UBE2K	0	0	0	0.002749	0.012817	0.162009	0	0.162009	0
ENST00000637881	ENSG00000008086	CDKL5	0.003341	0.008968	0.005905	0	0.009503	0.160702	0	0.160702	0.00784
ENST00000646544	ENSG00000198836	OPA1	0	0	0	0	0	0.158158	0	0.158158	0
ENST00000637782	ENSG00000164904	ALDH7A1	0	0	0	0	0	0.157174	0	0.157174	0
ENST00000645280	ENSG00000144659	SLC25A38	0	0	0.009038	0	0	0.15659	0	0.15659	0
ENST00000554919	ENSG00000100600	LGMN	0	0	0	0	0	0.156212	0	0.156212	0
ENST00000556061	ENSG00000100629	CEP128	0.002579	0	0.002147	0	0	0.150939	0.017331	0.150939	0
ENST00000646716	ENSG00000197912	SPG7	0	0	0	0	0	0.147097	0	0.147097	0
ENST00000646445	ENSG00000197912	SPG7	0	0	0	0	0	0.146806	0	0.146806	0
ENST00000446515	ENSG00000025800	KPNA6	0	0	0	0	0	0.145297	0	0.145297	0
ENST00000397095	ENSG00000164849	GPR146	0.000987	0	0	0	0.03732	0.144909	0	0.144909	0
ENST00000543993	ENSG00000173391	OLR1	0	0	0	0	0	0.144319	0.020334	0.144319	0.014325
ENST00000381869	ENSG00000129422	MTUS1	8.9e-05	0	0	0	0	0.142732	0	0.142732	0
ENST00000444148	ENSG00000109103	UNC119	0	0	0	0	0	0.141317	0	0.141317	0
ENST00000394860	ENSG00000188372	ZP3	0.002959	0.003043	0	0.001493	0	0.140845	0	0.140845	0.025095
ENST00000370935	ENSG00000165675	ENOX2	0.000338	0	0	0	0	0.140297	0	0.140297	0
ENST00000503809	ENSG00000177311	ZBTB38	0	0	0.040017	0	0	0.140254	0	0.140254	0
ENST00000541064	ENSG00000119655	NPC2	0	0	0	0	0	0.139909	0	0.139909	0
ENST00000579361	ENSG00000133030	MPRIP	0.000622	0	0	0.000986	0.000656	0.139051	0.003238	0.139051	0.004299
ENST00000370767	ENSG00000162613	FUBP1	0	0	0	0	0	0.138098	0	0.138098	0
ENST00000622744	ENSG00000284906	ARHGAP11B	0	0	0	0	0	0.136722	0	0.136722	0
ENST00000442880	ENSG00000104660	LEPROTL1	0.015005	0	0	0.005834	0	0.134319	0	0.134319	0
ENST00000404040	ENSG00000163517	HDAC11	0	0	0	0	0	0.133318	0	0.133318	0
ENST00000581196	ENSG00000178927	CYBC1	0	0	0	0	0	0.131355	0	0.131355	0
ENST00000612316	ENSG00000130518	IQCN	0	0	0	0	0	0.131352	0	0.131352	0.04723
ENST00000409499	ENSG00000115966	ATF2	0	0.04542	0	0	0	0.129891	0	0.129891	0
ENST00000589683	ENSG00000131477	RAMP2	0	0	0	0	0	0.129207	0	0.129207	0
ENST00000507382	ENSG00000167105	TMEM92	0	0	0.016757	0	0	0.126115	0	0.126115	0
ENST00000554080	ENSG00000100600	LGMN	0	0.001375	0	0	0.00317	0.12566	0	0.12566	0
ENST00000585096	ENSG00000136450	SRSF1	0	0	0	0	0	0.12506	0	0.12506	0
ENST00000591269	ENSG00000177150	FAM210A	0.006374	0.001877	0.006419	0.014567	0.003522	0.124947	0	0.124947	0.000899
ENST00000532489	ENSG00000126457	PRMT1	0	0	0	0	0	0.123511	0	0.123511	0
ENST00000537100	ENSG00000139372	TDG	0.053036	0	0	0	0	0.122788	0	0.122788	0
ENST00000407467	ENSG00000169884	WNT10B	0	0	0	0	0	0.121582	0	0.121582	0
ENST00000650810	ENSG00000119950	MXI1	0	0	0.05631	0	0	0.121225	0	0.121225	0.000992
ENST00000393249	ENSG00000091039	OSBPL8	0.000479	0	0.00173	0.000253	0	0.120932	0	0.120932	0
ENST00000437604	ENSG00000091140	DLD	0	0	0	0	0	0.120563	0.027946	0.120563	0
ENST00000589337	ENSG00000105576	TNPO2	0	0	0	0	0	0.118715	0	0.118715	0
ENST00000400294	ENSG00000185133	INPP5J	0	0.011775	0	0	0	0.118425	0	0.118425	0
ENST00000383715	ENSG00000168297	PXK	0.010609	0.001139	0.001133	0.014726	0	0.118415	0.002882	0.118415	0
ENST00000327307	ENSG00000085721	RRN3	0	0.00955	0.004302	0	0	0.118085	0	0.118085	0.000671
ENST00000324385	ENSG00000007516	BAIAP3	0	0	0	0	0	0.117978	0	0.117978	0
ENST00000320699	ENSG00000141994	DUS3L	0	0	0	0	0	0.117521	0	0.117521	0
ENST00000647032	ENSG00000197912	SPG7	0.025025	0	0	0	0.01185	0.117055	0	0.117055	0
ENST00000482842	ENSG00000124508	BTN2A2	0	0	0	0	0.051826	0.116724	0	0.116724	0
ENST00000517672	ENSG00000153310	FAM49B	0	0	0	0.050403	0	0.11454	0	0.11454	0
ENST00000418097	ENSG00000123191	ATP7B	0	0	0	0	0	0.114299	0	0.114299	0
ENST00000360342	ENSG00000088899	LZTS3	0.004178	0.00619	0	0	0	0.114089	0	0.114089	0
ENST00000488787	ENSG00000100226	GTPBP1	0	0	0	0.00369	0	0.114022	0	0.114022	0
ENST00000445474	ENSG00000082438	COBLL1	0	0	0	0	0	0.113488	0	0.113488	0
ENST00000506956	ENSG00000168214	RBPJ	0.003926	0.001489	0	0.000595	0.027656	0.113299	0.001452	0.113299	0.007475
ENST00000324301	ENSG00000133313	CNDP2	0	0	0	0	0	0.110721	0	0.110721	0
ENST00000618049	ENSG00000197619	ZNF615	0	0.003181	0	0	0	0.108911	0.023907	0.108911	0
ENST00000557592	ENSG00000100823	APEX1	0	0.029228	0	0	1e-06	0.108702	0	0.108702	0
ENST00000620134	ENSG00000103148	NPRL3	0	0	0	0.01895	0	0.10657	0	0.10657	0.000256
ENST00000370366	ENSG00000101191	DIDO1	0	0	0	0	0	0.10625	0	0.10625	0
ENST00000424591	ENSG00000163898	LIPH	0	0	0	0	0	0.106184	0	0.106184	0.037708
ENST00000558878	ENSG00000137843	PAK6	0	0	0	0	0	0.105526	0	0.105526	0.031738
ENST00000427721	ENSG00000250644	AC068580.4	0	0	0	0	0	0.105347	0	0.105347	0
ENST00000649563	ENSG00000183765	CHEK2	0	0	0	0	0	0.105299	0	0.105299	0
ENST00000646713	ENSG00000113163	COL4A3BP	0	0	0	0	0	0.105232	0	0.105232	0
ENST00000632538	ENSG00000273154	AL121845.3	0	0	0	0	0	0.105053	0	0.105053	0
ENST00000588261	ENSG00000108840	HDAC5	0	0	0	0	0	0.105026	0	0.105026	0
ENST00000392790	ENSG00000138161	CUZD1	0	0	0	0	0	0.104497	0	0.104497	0
ENST00000648877	ENSG00000127955	GNAI1	0	0	0	0	0	0.10442	0	0.10442	0
ENST00000478263	ENSG00000114541	FRMD4B	0	0.001839	0	0	0	0.103982	0	0.103982	0
ENST00000375044	ENSG00000117245	KIF17	0	0	0	0	0	0.10355	0	0.10355	0
ENST00000457599	ENSG00000117713	ARID1A	0	0	0	0	0	0.103198	0	0.103198	0
ENST00000487272	ENSG00000111801	BTN3A3	0	0	0	0	0	0.103082	0	0.103082	0
ENST00000539128	ENSG00000162144	CYB561A3	2.4e-05	4.1e-05	3e-06	2e-06	0	0.103058	5.8e-05	0.103058	1e-06
ENST00000619232	ENSG00000276644	DACH1	0	0.005749	0	0	0	0.102938	0	0.102938	0.002304
ENST00000565408	ENSG00000166971	AKTIP	0	0	0	0	0	0.102647	0	0.102647	0.006046
ENST00000533558	ENSG00000166394	CYB5R2	0	0	0	0	0	0.102607	0	0.102607	0.009388
ENST00000600777	ENSG00000179913	B3GNT3	0	0	0	0	0	0.101807	0	0.101807	0
ENST00000397573	ENSG00000104081	BMF	0	0	0	1.3e-05	0.000608	0.101177	0	0.101177	0
ENST00000531159	ENSG00000135372	NAT10	0	0	0	0	0	0.101089	0	0.101089	0
ENST00000553397	ENSG00000166888	STAT6	0.005421	0	0	0	0.004778	0.101075	0.009985	0.101075	0
ENST00000370973	ENSG00000116729	WLS	0	0	0	0	0	0.100949	0	0.100949	0
ENST00000311862	ENSG00000186652	PRG2	0.002559	0	0	0	0	0.10044	0.012572	0.10044	0.008175
ENST00000445006	ENSG00000128683	GAD1	0	0	0	0	0	0.100346	0	0.100346	0
ENST00000619799	ENSG00000186567	CEACAM19	0	0	0	0	0	0.097399	0	0.097399	0
ENST00000532277	ENSG00000165490	DDIAS	0	0	0	0.018355	0	0.09715	0	0.09715	0
ENST00000367380	ENSG00000120265	PCMT1	0	0	0	0	0	0.096973	0	0.096973	0
ENST00000444090	ENSG00000026751	SLAMF7	0	0	0	0	0	0.096552	0	0.096552	0.02199
ENST00000531105	ENSG00000132781	MUTYH	0	0	0	0	0.022694	0.096285	0	0.096285	0
ENST00000329134	ENSG00000183878	UTY	0.002666	0.002157	0	0.00331	0	0.096132	0.001083	0.096132	0.002718
ENST00000598689	ENSG00000171649	ZIK1	0	0	0	0	0	0.095672	0	0.095672	0
ENST00000357338	ENSG00000171462	DLK2	0	0	0.005486	0	0	0.095209	0.007569	0.095209	0
ENST00000507375	ENSG00000109576	AADAT	0	0	0	0	0.040521	0.092764	0	0.092764	0
ENST00000587487	ENSG00000104907	TRMT1	0	0	0	0	0	0.092418	0	0.092418	0
ENST00000433418	ENSG00000197142	ACSL5	0	0	0.003738	0	0	0.091241	0	0.091241	0
ENST00000527990	ENSG00000179532	DNHD1	0	0.002167	0	0	0	0.091196	0	0.091196	3.7e-05
ENST00000202028	ENSG00000088367	EPB41L1	0	0.001974	0	0.001141	0.004409	0.090568	0	0.090568	0.008948
ENST00000644893	ENSG00000177189	RPS6KA3	0	0	0	0	0	0.08953	0	0.08953	0
ENST00000589335	ENSG00000170832	USP32	0	0	0	0	5.2e-05	0.08951	0	0.08951	0.003892
ENST00000361705	ENSG00000010803	SCMH1	0.000209	0.000581	0.000367	0.011862	0.012455	0.089286	0.000944	0.089286	0
ENST00000589093	ENSG00000179873	NLRP11	0	0	0	0	0	0.088778	0	0.088778	0
ENST00000634665	ENSG00000102100	SLC35A2	0	0	0	0	0	0.088685	0	0.088685	0
ENST00000604948	ENSG00000100890	KIAA0391	0	0	0	0	0	0.088641	0	0.088641	0
ENST00000380347	ENSG00000125787	GNRH2	0	0.01261	0	0.021498	0	0.088293	0	0.088293	0
ENST00000367945	ENSG00000162746	FCRLB	0	0	0	0	0	0.087777	0	0.087777	0
ENST00000448616	ENSG00000130720	FIBCD1	0.008679	0.000989	0.001563	0.000852	0.000246	0.087144	0.000747	0.087144	0.00123
ENST00000381525	ENSG00000169016	E2F6	0	0	0	0	0	0.086815	0	0.086815	0
ENST00000530685	ENSG00000134470	IL15RA	0	0	0	0	0	0.086671	0	0.086671	0
ENST00000599567	ENSG00000213024	NUP62	0	0	0.020865	0	0	0.08665	0	0.08665	0
ENST00000547394	ENSG00000257923	CUX1	0	0	0	0	0	0.085743	0	0.085743	0
ENST00000537854	ENSG00000051825	MPHOSPH9	0	0	0.004308	0	0	0.08568	0	0.08568	0
ENST00000327087	ENSG00000047617	ANO2	0	0	0	0	0	0.085292	0	0.085292	0
ENST00000539661	ENSG00000197562	RAB40C	0	0.000819	0	0.003703	0	0.084543	0	0.084543	0.000571
ENST00000645462	ENSG00000088899	LZTS3	0.006342	0.005098	0	0	0	0.084497	0	0.084497	0
ENST00000559186	ENSG00000166411	IDH3A	0	0	0	0	0	0.083787	0.031121	0.083787	0
ENST00000491906	ENSG00000121578	B4GALT4	0	0	0	0	0	0.083517	0	0.083517	0
ENST00000510194	ENSG00000113552	GNPDA1	0	0	0	0	0.000836	0.083413	0	0.083413	0
ENST00000328767	ENSG00000125247	TMTC4	0	0	0	0	0	0.083396	0	0.083396	0
ENST00000455654	ENSG00000148468	FAM171A1	0	0	0	0	0	0.081998	0	0.081998	0
ENST00000592354	ENSG00000126247	CAPNS1	0	0	0	0	0	0.081971	0	0.081971	0
ENST00000521895	ENSG00000104231	ZFAND1	0	0	0	0	0	0.081913	0	0.081913	0
ENST00000361391	ENSG00000198561	CTNND1	0	0	0	0.008778	0	0.081799	0.016474	0.081799	0
ENST00000643390	ENSG00000180488	MIGA1	0	0.01712	0	0	0	0.081783	0.016957	0.081783	0
ENST00000487950	ENSG00000112130	RNF8	0	0	0	0	0	0.081525	0	0.081525	0
ENST00000542293	ENSG00000175575	PAAF1	0	0	0	0	0	0.081145	0	0.081145	0
ENST00000543522	ENSG00000198826	ARHGAP11A	0	0	0	0	0	0.079492	0	0.079492	0
ENST00000416505	ENSG00000104365	IKBKB	0	0	0.00667	0	0	0.079238	0	0.079238	0
ENST00000454375	ENSG00000077063	CTTNBP2	0	0	0	0	0	0.078031	0	0.078031	0
ENST00000530064	ENSG00000205531	NAP1L4	0	0	0	0	0	0.077343	0	0.077343	0
ENST00000451256	ENSG00000128335	APOL2	0	0	0.00734	0	0	0.076973	0	0.076973	0
ENST00000525587	ENSG00000134809	TIMM10	0	0	0	0	0	0.074519	0	0.074519	0
ENST00000551927	ENSG00000091039	OSBPL8	0	0	0	0	0	0.073944	0	0.073944	0
ENST00000311637	ENSG00000054793	ATP9A	0	0	0	0	0.002602	0.073925	0	0.073925	0.001286
ENST00000581438	ENSG00000175224	ATG13	0.001311	0	0	0	0	0.073867	0	0.073867	0
ENST00000288602	ENSG00000157764	BRAF	0	0	0.004685	0	0.003098	0.0737	0.002761	0.0737	0.005591
ENST00000477813	ENSG00000121579	NAA50	0	0	0	0	0	0.073272	0	0.073272	0
ENST00000527949	ENSG00000025434	NR1H3	0	0	0	0	0	0.072398	0	0.072398	0
ENST00000599300	ENSG00000105499	PLA2G4C	0	0	0	0	0	0.071426	0	0.071426	0
ENST00000462512	ENSG00000114541	FRMD4B	0	0	0	0	0	0.071054	0	0.071054	0
ENST00000343534	ENSG00000143110	C1orf162	0	0	0	0.01232	0.00247	0.070932	0	0.070932	0.003293
ENST00000580189	ENSG00000141526	SLC16A3	0	0	0	0	0	0.07081	0	0.07081	0
ENST00000304076	ENSG00000141968	VAV1	0	0	0	0	0	0.070802	0	0.070802	0
ENST00000534558	ENSG00000173039	RELA	0	0	0	0	0	0.070702	0	0.070702	0
ENST00000429346	ENSG00000102543	CDADC1	0	0	0	0	0	0.070648	0	0.070648	0
ENST00000455504	ENSG00000197647	ZNF433	0	0	0	0	0	0.070158	0	0.070158	0
ENST00000334095	ENSG00000160336	ZNF761	0	0	0	0.02071	0	0.070137	0	0.070137	0
ENST00000562637	ENSG00000167173	C15orf39	0	0	0	0	0	0.069697	0	0.069697	0
ENST00000510286	ENSG00000145214	DGKQ	0	0	0	0	0	0.069244	0	0.069244	0
ENST00000562008	ENSG00000125170	DOK4	0	0	0	0	0	0.0691	0	0.0691	0
ENST00000642809	ENSG00000113163	COL4A3BP	0	0	0	0	0	0.068768	0	0.068768	0
ENST00000412011	ENSG00000198399	ITSN2	0.001894	0	0	0.001966	0.002188	0.068753	0.004598	0.068753	0
ENST00000392668	ENSG00000134954	ETS1	0	0.000878	0.001726	0	0.001472	0.068308	0	0.068308	0
ENST00000560494	ENSG00000137776	SLTM	0	0	0	0	0.028102	0.066531	0	0.066531	0.000794
ENST00000453446	ENSG00000139631	CSAD	0	0.016971	0	0	0	0.066146	0	0.066146	0
ENST00000418005	ENSG00000196950	SLC39A10	0	0	0	0	0	0.065542	0	0.065542	0.00217
ENST00000594625	ENSG00000130479	MAP1S	0	0	0	0	0	0.065489	0	0.065489	0
ENST00000550647	ENSG00000127328	RAB3IP	0	0	0	0	0	0.064712	0	0.064712	0
ENST00000421184	ENSG00000015413	DPEP1	0	0	0	0	0	0.063464	0.02485	0.063464	0
ENST00000424168	ENSG00000198342	ZNF442	0	0	0	0.003787	0.002983	0.06313	0	0.06313	0
ENST00000415360	ENSG00000012817	KDM5D	0	0	0	0	0	0.062639	0	0.062639	0
ENST00000263100	ENSG00000121410	A1BG	0	0.002188	0	0	0	0.062504	0	0.062504	0
ENST00000581959	ENSG00000177885	GRB2	0	0	0.007134	0	0	0.062366	0	0.062366	0
ENST00000592780	ENSG00000256294	ZNF225	0.026568	0	0	0	0	0.061841	0	0.061841	0
ENST00000548887	ENSG00000166987	MBD6	0	0	0	0	0	0.061565	0	0.061565	0
ENST00000420370	ENSG00000173801	JUP	0	0	0	0	0	0.061331	0	0.061331	0
ENST00000425641	ENSG00000115841	RMDN2	0.006514	0	0	0.008387	0	0.061174	0	0.061174	0
ENST00000652218	ENSG00000172738	TMEM217	0	0	0	0	0	0.060742	0	0.060742	0
ENST00000534177	ENSG00000168062	BATF2	0	0	0.003869	0	0	0.060682	0.006961	0.060682	0
ENST00000572619	ENSG00000127564	PKMYT1	0	0	0	0	0	0.060004	0	0.060004	0
ENST00000554768	ENSG00000100714	MTHFD1	0	0	0	0	0	0.059652	0	0.059652	0
ENST00000547800	ENSG00000139624	CERS5	0	0	0	0	0	0.059609	0	0.059609	0
ENST00000596443	ENSG00000090924	PLEKHG2	0	0	0	0	0	0.059139	0	0.059139	0
ENST00000442114	ENSG00000181577	C6orf223	0	0	0	0	0	0.058954	0	0.058954	0
ENST00000396991	ENSG00000148985	PGAP2	0	0	0	4.8e-05	0	0.058579	0	0.058579	0.000411
ENST00000370183	ENSG00000166167	BTRC	0	0.001662	0.008511	0	0	0.05808	0	0.05808	0.00328
ENST00000339474	ENSG00000176809	LRRC37A3	0	0	0	0	0.002626	0.057502	0.001276	0.057502	0
ENST00000432508	ENSG00000148824	MTG1	0	0	0	0	0	0.057249	0	0.057249	0
ENST00000443752	ENSG00000114423	CBLB	0	0	0	0	0	0.057147	0	0.057147	0
ENST00000603881	ENSG00000112679	DUSP22	0	0	0.020365	0	0	0.057023	0	0.057023	0
ENST00000370241	ENSG00000055950	MRPL43	0	0	0	0	0	0.056405	0	0.056405	0
ENST00000639589	ENSG00000139174	PRICKLE1	0	0	0	0	0	0.056146	0	0.056146	0
ENST00000547453	ENSG00000076108	BAZ2A	0	0	0	0	0	0.055946	0	0.055946	0
ENST00000585642	ENSG00000141404	GNAL	0	0	0	0	0	0.055565	0	0.055565	0
ENST00000536626	ENSG00000125864	BFSP1	0	0.005456	0.007012	0.001299	0	0.05495	0	0.05495	0
ENST00000375723	ENSG00000102606	ARHGEF7	0	0	0	0	0	0.054812	0	0.054812	0
ENST00000398556	ENSG00000121753	ADGRB2	0.000296	0.0003	0	0	0.009648	0.054768	0	0.054768	0.00174
ENST00000643192	ENSG00000114423	CBLB	0	0	0	0.003759	0	0.054708	0	0.054708	0.004498
ENST00000575009	ENSG00000167978	SRRM2	0.008746	0.002373	0.001378	0.000692	0.001035	0.054693	0.000787	0.054693	0.002085
ENST00000427466	ENSG00000130775	THEMIS2	0	0	0	0	0	0.054517	0	0.054517	0
ENST00000309182	ENSG00000167716	WDR81	0	0	0	0	0	0.054231	0	0.054231	0
ENST00000599892	ENSG00000011422	PLAUR	0	0	0	0	0	0.053896	0	0.053896	0
ENST00000394432	ENSG00000068831	RASGRP2	0	0	0	0	0	0.053648	0	0.053648	0.010933
ENST00000622612	ENSG00000153094	BCL2L11	0	0	0	0	0	0.053272	0	0.053272	0
ENST00000320362	ENSG00000125454	SLC25A19	0	0	0	0	0	0.053214	0	0.053214	0
ENST00000418708	ENSG00000144504	ANKMY1	0	1e-06	0	0	0	0.052236	0	0.052236	0
ENST00000523993	ENSG00000153310	FAM49B	0	0	0	0	0	0.051718	0.012044	0.051718	0.002205
ENST00000369459	ENSG00000185515	BRCC3	0.001966	0.000116	0.000297	0.000231	0.000255	0.051314	0.000259	0.051314	0.000151
ENST00000382658	ENSG00000242389	RBMY1E	0	0	0	0	0	0.051065	0	0.051065	0
ENST00000598692	ENSG00000132002	DNAJB1	0	0	0	0	0	0.050971	0	0.050971	0
ENST00000514663	ENSG00000163138	PACRGL	0	0.007768	0	0	0	0.050894	0	0.050894	0.003252
ENST00000586836	ENSG00000198003	CCDC151	0.003068	0.002875	0.000544	0.003929	0.000741	0.050573	0.000452	0.050573	0.00217
ENST00000523228	ENSG00000173818	ENDOV	0	0	0.019403	0	0	0.050514	0	0.050514	0
ENST00000467977	ENSG00000082996	RNF13	0	0	0	0	0	0.050433	0	0.050433	0
ENST00000418026	ENSG00000234127	TRIM26	0	0	0	0	0	0.050129	0	0.050129	0
ENST00000414791	ENSG00000177409	SAMD9L	0	0	0	0	0	0.049941	0	0.049941	0
ENST00000421218	ENSG00000060971	ACAA1	0	0	0	0	0	0.049333	0	0.049333	0
ENST00000524604	ENSG00000172350	ABCG4	0	0	0	0	0	0.0493	0	0.0493	0
ENST00000538903	ENSG00000111737	RAB35	0	0	0	0	0	0.049176	0	0.049176	0
ENST00000541852	ENSG00000135916	ITM2C	0	0	0	0	0	0.048927	0	0.048927	0
ENST00000442620	ENSG00000243477	NAA80	0	0	0	2.2e-05	6e-06	0.048893	0	0.048893	0
ENST00000592745	ENSG00000130023	ERMARD	0	0	0	0	0	0.048876	0	0.048876	0
ENST00000599528	ENSG00000130518	IQCN	0.001028	0	0	0	0.019265	0.048642	0	0.048642	0
ENST00000648462	ENSG00000106348	IMPDH1	0.012485	0	0	0	0	0.047883	0	0.047883	0
ENST00000458057	ENSG00000183305	MAGEA2B	0	0.003621	0	0.003552	0	0.047882	0	0.047882	0
ENST00000361746	ENSG00000126091	ST3GAL3	0	0	0	0	0	0.047517	0.001231	0.047517	0.004898
ENST00000430860	ENSG00000205927	OLIG2	0	0.014686	0	0	0	0.047515	0	0.047515	0
ENST00000531138	ENSG00000123892	RAB38	0	0	0	0	0	0.047325	0	0.047325	0
ENST00000618490	ENSG00000117602	RCAN3	0	0	0	0	0	0.047109	0	0.047109	0
ENST00000502831	ENSG00000081189	MEF2C	0	0	0	0	0	0.046882	0	0.046882	0
ENST00000539449	ENSG00000130347	RTN4IP1	0	0	0	0	0	0.046793	0	0.046793	0
ENST00000529825	ENSG00000133794	ARNTL	0	0	0	0	0.004135	0.046627	0.004615	0.046627	0.003767
ENST00000549368	ENSG00000065357	DGKA	0	0.004473	0	0.002603	0	0.046352	0	0.046352	0
ENST00000373092	ENSG00000101049	SGK2	0	0	0	0	0	0.045816	0	0.045816	0
ENST00000594195	ENSG00000105559	PLEKHA4	0	0	0	0	0	0.044494	0	0.044494	0
ENST00000584061	ENSG00000108439	PNPO	0	0	0	0	0	0.043909	0	0.043909	0
ENST00000546183	ENSG00000205683	DPF3	0	0	0	0	0	0.043706	0	0.043706	0
ENST00000440961	ENSG00000183560	IZUMO1R	0	0	0	0	0	0.043498	0.00734	0.043498	0.004505
ENST00000515359	ENSG00000173402	DAG1	0	0	0	0	0	0.043358	0	0.043358	4.3e-05
ENST00000590906	ENSG00000153885	KCTD15	0.004843	0	0	0	2e-06	0.04246	0	0.04246	0
ENST00000533902	ENSG00000150687	PRSS23	0	0	0	0	0	0.04222	0	0.04222	0
ENST00000568283	ENSG00000102900	NUP93	0	0	0	0	0	0.042013	0	0.042013	0
ENST00000451085	ENSG00000173114	LRRN3	0	0	0.004962	0	0	0.041529	0.010056	0.041529	0
ENST00000453793	ENSG00000124256	ZBP1	0	0	0	0	0	0.041513	0	0.041513	0
ENST00000550181	ENSG00000167528	ZNF641	0	0	0	0	0	0.041343	0	0.041343	0
ENST00000402922	ENSG00000118004	COLEC11	0	0	0	0	0	0.041154	0.004961	0.041154	0
ENST00000436178	ENSG00000119912	IDE	0.002141	0	0	0	0	0.040789	0	0.040789	0.000498
ENST00000422249	ENSG00000160703	NLRX1	0	0	0	0	0	0.040754	0	0.040754	0
ENST00000466322	ENSG00000079337	RAPGEF3	0	0	0	0	0	0.040693	0	0.040693	0
ENST00000488892	ENSG00000161249	DMKN	0	0	0	0	0	0.039884	0	0.039884	0
ENST00000534359	ENSG00000129749	CHRNA10	0	0	0	0	0	0.039857	0	0.039857	0
ENST00000368134	ENSG00000164483	SAMD3	0	0	0	0	0	0.039791	0	0.039791	0
ENST00000435336	ENSG00000106266	SNX8	0	0	0	0	0	0.039659	0	0.039659	0
ENST00000414158	ENSG00000124143	ARHGAP40	0	0	0.01531	0	0	0.039478	0	0.039478	0
ENST00000548279	ENSG00000167535	CACNB3	0.000691	0	0.009561	0	0	0.039214	0	0.039214	0.000684
ENST00000567504	ENSG00000065054	SLC9A3R2	0	0	0	0	0	0.03912	0	0.03912	0
ENST00000569375	ENSG00000159625	DRC7	0	0	0	0	0	0.038969	0	0.038969	0
ENST00000425989	ENSG00000115677	HDLBP	0.003568	0	0	0	0	0.038872	0	0.038872	0.009117
ENST00000483411	ENSG00000090097	PCBP4	0	0	0	0	0	0.038666	0	0.038666	0
ENST00000540610	ENSG00000159403	C1R	0	0	0	0	0	0.038517	0	0.038517	0
ENST00000423436	ENSG00000160796	NBEAL2	0	0	0	0	0	0.038361	0	0.038361	0
ENST00000413546	ENSG00000067369	TP53BP1	0	0	0	0	0	0.038316	0	0.038316	0
ENST00000576916	ENSG00000122390	NAA60	0	0	0	0	0	0.038136	0	0.038136	0
ENST00000617470	ENSG00000073578	SDHA	0	0	0	0	0	0.038106	0	0.038106	0
ENST00000559632	ENSG00000157326	DHRS4	0	0	0	0	0	0.037809	0	0.037809	0
ENST00000646419	ENSG00000109099	PMP22	0	0	0	0	0	0.037699	0	0.037699	0
ENST00000490540	ENSG00000213199	ASIC3	0	0	0	0	0.002416	0.03764	0	0.03764	0
ENST00000524840	ENSG00000110723	EXPH5	0	0	0	0	0	0.037635	0	0.037635	0
ENST00000525809	ENSG00000174483	BBS1	0	0	0	0	0	0.037537	0	0.037537	0
ENST00000578944	ENSG00000168961	LGALS9	0	0	0	0	0	0.037133	0	0.037133	0
ENST00000503330	ENSG00000113494	PRLR	0	0	0	0	0	0.037012	0	0.037012	0.001691
ENST00000535407	ENSG00000172927	MYEOV	0.000568	0.000655	0	0	0	0.036949	0.001634	0.036949	0.002672
ENST00000524020	ENSG00000085382	HACE1	0.002979	0	0.003662	0.005174	0	0.03679	0	0.03679	0.001771
ENST00000334346	ENSG00000169688	MT1B	0	0	0	0	0	0.036362	0	0.036362	0
ENST00000559479	ENSG00000100938	GMPR2	0	0	0	0	0	0.036079	0	0.036079	0
ENST00000439267	ENSG00000171552	BCL2L1	0	0	0	0	0	0.035957	0	0.035957	0
ENST00000310991	ENSG00000178821	TMEM52	0.001147	0	0	0	0	0.03586	0	0.03586	0
ENST00000598984	ENSG00000104852	SNRNP70	0	0	0	0	0	0.035628	0	0.035628	0
ENST00000368787	ENSG00000163202	LCE3D	0	0	0	0	0	0.035602	0	0.035602	0
ENST00000557311	ENSG00000066427	ATXN3	0	0	0	0	0	0.03554	0	0.03554	0
ENST00000514497	ENSG00000064692	SNCAIP	0.003102	0.011767	0	0	0	0.035467	0	0.035467	0
ENST00000568042	ENSG00000066933	MYO9A	0.009728	0	0	0	0	0.034426	0	0.034426	0.002685
ENST00000432106	ENSG00000138074	SLC5A6	0	0	0	0	0	0.034165	0	0.034165	0
ENST00000418843	ENSG00000152457	DCLRE1C	0	0	0	0	0	0.033975	0	0.033975	0
ENST00000594287	ENSG00000090372	STRN4	0	0	0	0	0	0.033876	0	0.033876	0
ENST00000507523	ENSG00000168310	IRF2	0	0	0	0	0	0.03376	0.000118	0.03376	0
ENST00000449070	ENSG00000115392	FANCL	0	0	0	0	0	0.033236	0	0.033236	0
ENST00000641558	ENSG00000164073	MFSD8	0	0	0	0	0	0.03299	0	0.03299	0
ENST00000548664	ENSG00000111424	VDR	0	0	0	0	0	0.032844	0	0.032844	0
ENST00000440179	ENSG00000136824	SMC2	0	0	0	0	0	0.032709	0	0.032709	0
ENST00000231021	ENSG00000113100	CDH9	0	0	0	0	0	0.032473	0	0.032473	0
ENST00000542801	ENSG00000123106	CCDC91	0	0.005058	0	0	0	0.032102	0	0.032102	0
ENST00000567657	ENSG00000140398	NEIL1	0	0	0	0	0	0.032038	0	0.032038	0
ENST00000568828	ENSG00000178802	MPI	0	0	0	0	0	0.031773	0	0.031773	0
ENST00000376855	ENSG00000134873	CLDN10	0	0	0	0	0	0.031742	0	0.031742	0
ENST00000374877	ENSG00000141519	CCDC40	0	0	0.012231	0	0	0.031196	0	0.031196	0
ENST00000561001	ENSG00000100897	DCAF11	0	0	0	0	0	0.031133	0	0.031133	0
ENST00000539261	ENSG00000111341	MGP	0	0	0	0	0	0.031094	0	0.031094	0.009301
ENST00000394175	ENSG00000073605	GSDMB	0	0	0	0	0	0.03098	0	0.03098	0
ENST00000479771	ENSG00000047457	CP	0	0	0	0	0	0.030759	0	0.030759	0
ENST00000621039	ENSG00000144596	GRIP2	0	0	0	0	0	0.03069	0.000452	0.03069	0
ENST00000568424	ENSG00000103034	NDRG4	0	0	0	0	0	0.030562	0	0.030562	0
ENST00000538027	ENSG00000151062	CACNA2D4	0	0.000465	0.001007	0	0	0.030422	1e-06	0.030422	0.000182
ENST00000469385	ENSG00000144834	TAGLN3	0	0	0	0	0	0.030322	0	0.030322	0
ENST00000278927	ENSG00000149564	ESAM	0	0.005953	0	0	0.002889	0.02986	0	0.02986	0
ENST00000383572	ENSG00000197763	TXNRD3	0	0	0	0	0	0.02961	0	0.02961	0
ENST00000471770	ENSG00000128609	NDUFA5	0.000134	0.000242	0.001221	0.002259	0	0.029606	0.000667	0.029606	0.000394
ENST00000597756	ENSG00000074181	NOTCH3	0	0	0	0	0	0.029603	0	0.029603	0
ENST00000585966	ENSG00000186300	ZNF555	0	0	0	0	0	0.029539	0	0.029539	0
ENST00000570232	ENSG00000213658	LAT	0	0	0	0.002565	0	0.029242	0	0.029242	0
ENST00000349457	ENSG00000159618	ADGRG5	0	0	0	0	0.004444	0.029219	0	0.029219	0
ENST00000639382	ENSG00000124155	PIGT	0	0	0	0	0	0.029162	0	0.029162	0
ENST00000520241	ENSG00000108852	MPP2	0	0	0	0	0	0.028839	0	0.028839	0
ENST00000577051	ENSG00000141556	TBCD	0	0	0	0	0	0.028508	0	0.028508	0
ENST00000423196	ENSG00000106012	IQCE	0	0	0	0	0	0.028483	0	0.028483	0
ENST00000422867	ENSG00000001630	CYP51A1	0	0	0	0	0	0.028483	0	0.028483	0
ENST00000397959	ENSG00000015171	ZMYND11	0	0	0	0	0	0.028409	0	0.028409	0
ENST00000550876	ENSG00000186908	ZDHHC17	0.003747	0.002923	0	0	0	0.028276	0	0.028276	0
ENST00000509154	ENSG00000064692	SNCAIP	0.007142	0	0	0	0	0.02803	0	0.02803	0.003393
ENST00000557511	ENSG00000080815	PSEN1	0	0	0	0	0	0.027835	0	0.027835	0
ENST00000565237	ENSG00000166454	ATMIN	0	0	0	0.008695	0	0.027571	0	0.027571	0
ENST00000505853	ENSG00000146021	KLHL3	0	0	0	0	0	0.027115	0	0.027115	0
ENST00000479070	ENSG00000095794	CREM	0	0	0	0	0	0.026907	0	0.026907	0
ENST00000239117	ENSG00000120049	KCNIP2	0	0	0	0	0	0.026749	0	0.026749	0
ENST00000647774	ENSG00000285947	AC127029.3	0	0	0	0	0	0.026541	0	0.026541	0
ENST00000543444	ENSG00000189046	ALKBH2	0.0011	0.000454	3e-06	1.5e-05	0.000108	0.026139	0.000726	0.026139	2e-06
ENST00000525498	ENSG00000021762	OSBPL5	0	0	0	0	0	0.026079	0	0.026079	0
ENST00000588749	ENSG00000105298	CACTIN	0	0	0	0	0	0.025925	0	0.025925	0
ENST00000422706	ENSG00000100342	APOL1	6.8e-05	0	1.1e-05	0	0	0.02591	0.003473	0.02591	0.001101
ENST00000426053	ENSG00000100342	APOL1	0	0	0	0	0	0.025789	0	0.025789	0.005269
ENST00000360085	ENSG00000131096	PYY	0	0	0	0	0	0.025546	0	0.025546	0
ENST00000652601	ENSG00000142166	IFNAR1	0	0	0	0	0.01148	0.025368	0	0.025368	0
ENST00000432496	ENSG00000145348	TBCK	0	0	0	0	0	0.024969	0	0.024969	0.005944
ENST00000452521	ENSG00000082258	CCNT2	0	0	0	0	0	0.024704	0	0.024704	0
ENST00000567536	ENSG00000178188	SH2B1	0	0	0	0	0	0.024498	0	0.024498	0
ENST00000506072	ENSG00000151790	TDO2	0	0	0	0	0	0.024446	0	0.024446	0
ENST00000587636	ENSG00000088256	GNA11	0	0	0	0	0	0.024388	0	0.024388	0
ENST00000522227	ENSG00000044115	CTNNA1	0	0	0	0	0	0.024295	0	0.024295	0
ENST00000559533	ENSG00000092098	RNF31	0	0	0	0	0	0.02408	0	0.02408	0
ENST00000449025	ENSG00000204256	BRD2	0	0	0	0.0009	0	0.024011	0	0.024011	0
ENST00000535822	ENSG00000125846	ZNF133	0	0	0	0	0	0.023929	0	0.023929	0
ENST00000446656	ENSG00000124003	MOGAT1	0	0	0	0	0	0.023914	0	0.023914	0
ENST00000560443	ENSG00000092295	TGM1	0	0	0	0	0	0.023899	0	0.023899	0
ENST00000421162	ENSG00000138376	BARD1	0	0	0	0	0	0.023895	0	0.023895	0
ENST00000345434	ENSG00000022267	FHL1	0	4.9e-05	0	0	0	0.023881	0.000196	0.023881	0
ENST00000423427	ENSG00000169760	NLGN1	0	0	0	0	0	0.023713	0	0.023713	0
ENST00000369331	ENSG00000165806	CASP7	0	0	0	0	0	0.023356	0	0.023356	0
ENST00000558502	ENSG00000185787	MORF4L1	0	0	0	0	0	0.023302	0	0.023302	0
ENST00000441048	ENSG00000162552	WNT4	0	0	0	0	0	0.023247	0	0.023247	0
ENST00000437746	ENSG00000110076	NRXN2	0	0	0	0	0	0.02307	0	0.02307	0
ENST00000559044	ENSG00000139946	PELI2	0	0	0	0	0.002543	0.022999	0	0.022999	0.004007
ENST00000599371	ENSG00000243137	PSG4	0	0	0	0	0	0.022892	0	0.022892	0
ENST00000510340	ENSG00000109576	AADAT	0.004318	0	0	0	0	0.022642	0	0.022642	0
ENST00000416272	ENSG00000178821	TMEM52	0	0	0	0	0	0.022579	0	0.022579	0
ENST00000411604	ENSG00000130768	SMPDL3B	0	0	0	0	0	0.022412	0	0.022412	0
ENST00000597078	ENSG00000197013	ZNF429	0	0	0	0	0	0.021928	0	0.021928	0
ENST00000479011	ENSG00000105856	HBP1	0.00117	0.00354	0.00179	2.6e-05	0.000192	0.021768	0.001318	0.021768	0.000313
ENST00000330847	ENSG00000119508	NR4A3	0	0	0	0	0.000463	0.021762	0	0.021762	0
ENST00000427912	ENSG00000205903	ZNF316	0	0	0	0	0	0.021755	0	0.021755	0
ENST00000367015	ENSG00000143469	SYT14	0	0	0	0	0	0.021743	0	0.021743	0
ENST00000221735	ENSG00000105136	ZNF419	0	0	0	0	0	0.021486	0	0.021486	0
ENST00000379995	ENSG00000147894	C9orf72	0	0	0	0	0	0.021057	0	0.021057	0
ENST00000600799	ENSG00000268799	AC106774.4	0	0	0	0	0	0.021001	0	0.021001	0
ENST00000646627	ENSG00000215301	DDX3X	0	0	0	0	0	0.020956	0	0.020956	0
ENST00000576024	ENSG00000141510	TP53	0	0	0	0	0	0.02047	0	0.02047	0
ENST00000582486	ENSG00000125447	GGA3	0	0	0	0	0.00689	0.020413	0.000142	0.020413	0
ENST00000382487	ENSG00000155269	GPR78	0	0	0	0	0	0.020397	0	0.020397	0
ENST00000443047	ENSG00000072609	CHFR	0	0	0	0	0.003196	0.020373	0	0.020373	0
ENST00000547755	ENSG00000170374	AC073611.1	0	0	0	0	0.006098	0.020218	0	0.020218	0
ENST00000369949	ENSG00000179902	C1orf194	0	0	0	0	0	0.020056	0	0.020056	0
ENST00000419868	ENSG00000157551	KCNJ15	0	0	0	0	0	0.020018	0	0.020018	0
ENST00000618002	ENSG00000181031	RPH3AL	0.001274	0	0	0	0	0.019995	0	0.019995	0
ENST00000374968	ENSG00000234068	PAGE2	0	0	0	0	0	0.019788	0	0.019788	0
ENST00000475435	ENSG00000132879	FBXO44	0	0	0	0	0	0.019771	0	0.019771	0
ENST00000622520	ENSG00000147862	NFIB	0	0	0	0	0	0.019566	0	0.019566	0
ENST00000471386	ENSG00000114861	FOXP1	0	0	0	0	0	0.019555	0	0.019555	0
ENST00000537951	ENSG00000185864	NPIPB4	0	0	0	0	0	0.019449	0	0.019449	0
ENST00000428193	ENSG00000108107	RPL28	0.000643	0.000401	0.000615	0.001015	1e-06	0.01935	0.001038	0.01935	0.000633
ENST00000542532	ENSG00000135090	TAOK3	0.006556	0	0	0	0	0.018768	0	0.018768	0
ENST00000392653	ENSG00000241794	SPRR2A	0	0	0	0	0	0.018698	0	0.018698	0
ENST00000573771	ENSG00000085644	ZNF213	0	0	0	0	0	0.018677	0	0.018677	0
ENST00000478076	ENSG00000065809	FAM107B	0	0	0	0	0	0.018422	0	0.018422	0.002234
ENST00000586963	ENSG00000126247	CAPNS1	0	0	0	0	0	0.018164	0	0.018164	0
ENST00000439350	ENSG00000205464	ATP6AP1L	0	0	0	0	0	0.018108	0	0.018108	0
ENST00000509231	ENSG00000184788	SATL1	0	0	0	0	0	0.017909	0	0.017909	0
ENST00000395822	ENSG00000124256	ZBP1	0	0	0	0	0	0.017861	0	0.017861	0
ENST00000375067	ENSG00000204305	AGER	0	0	0	0	3.3e-05	0.017835	0	0.017835	0
ENST00000480679	ENSG00000169764	UGP2	0	0	0	0	0	0.01763	0	0.01763	0.002901
ENST00000461712	ENSG00000182866	LCK	0	0	0	0	0	0.017545	0	0.017545	0
ENST00000382145	ENSG00000205863	C1QTNF9B	0	0	0	0	0	0.017311	0.004145	0.017311	0
ENST00000399510	ENSG00000132535	DLG4	0	0	0	0	0	0.017168	0	0.017168	0
ENST00000318357	ENSG00000163126	ANKRD23	0	0	0	0	0	0.017161	0.001096	0.017161	0
ENST00000591353	ENSG00000132000	PODNL1	0	0	0	0	0	0.016998	0	0.016998	0
ENST00000475447	ENSG00000113924	HGD	0	0	0	0	0	0.016891	0	0.016891	0
ENST00000646004	ENSG00000156500	FAM122C	0	3.6e-05	0	0	0.00613	0.016865	0	0.016865	0
ENST00000540656	ENSG00000139200	PIANP	0	0	0	0	0.002486	0.016412	0	0.016412	0.001352
ENST00000646873	ENSG00000160221	GATD3A	0	0.00412	0	0	0	0.016373	0.002069	0.016373	0
ENST00000581441	ENSG00000082641	NFE2L1	0.00207	0	0	0	0	0.016285	0	0.016285	0
ENST00000434006	ENSG00000229453	SPINK8	0	0	0	0	0	0.01626	0	0.01626	0
ENST00000467053	ENSG00000102606	ARHGEF7	0	0	0	0	0.003693	0.016208	0	0.016208	0
ENST00000646283	ENSG00000073584	SMARCE1	0	0	0	0	0	0.016123	0	0.016123	0
ENST00000528386	ENSG00000255192	NANOGP8	0	0	0	0	0	0.016105	0	0.016105	0
ENST00000428847	ENSG00000156509	FBXO43	0	0	0	0	0	0.01587	0	0.01587	0
ENST00000638166	ENSG00000283873	SSU72P4	0	0	0	0	0	0.015848	0	0.015848	0
ENST00000625807	ENSG00000184203	PPP1R2	0	0	0	0	0.000989	0.015827	0	0.015827	0
ENST00000556051	ENSG00000185559	DLK1	0	0	0	0	0	0.015815	0	0.015815	0
ENST00000566147	ENSG00000179361	ARID3B	0	0	0	0	0	0.015694	0	0.015694	0
ENST00000567189	ENSG00000103855	CD276	0	0	0	0	0	0.015598	0	0.015598	0
ENST00000427971	ENSG00000186635	ARAP1	0	0	0	0	0	0.015252	0	0.015252	0
ENST00000382826	ENSG00000206104	KRTAP20-3	0	0	0	0	0	0.015215	0	0.015215	0
ENST00000371431	ENSG00000186471	AKAP14	0	0	0	0	0	0.015183	0	0.015183	0
ENST00000404162	ENSG00000170178	HOXD12	0	0	0	0	0	0.015147	0	0.015147	0
ENST00000536729	ENSG00000134532	SOX5	0	0	0	0	0	0.015088	0	0.015088	0.004423
ENST00000650349	ENSG00000185513	L3MBTL1	0	0	0	0	0	0.015066	0	0.015066	0
ENST00000368730	ENSG00000056972	TRAF3IP2	0	0	0	0.006464	0	0.014976	0	0.014976	0
ENST00000441358	ENSG00000132692	BCAN	0	0	0	0	0	0.014739	0	0.014739	0
ENST00000634353	ENSG00000283071	LBHD2	0	0	0	0	0	0.01473	0	0.01473	0
ENST00000426184	ENSG00000127948	POR	0	0	0	0	0	0.014727	0	0.014727	0
ENST00000529555	ENSG00000251247	ZNF345	0	0	0	0	0	0.014721	0.002657	0.014721	0.002036
ENST00000566371	ENSG00000197912	SPG7	0	0	0	0	0	0.014656	0	0.014656	0
ENST00000418738	ENSG00000167244	IGF2	0	0	0	0	0	0.014582	0	0.014582	0
ENST00000590851	ENSG00000129990	SYT5	0	0	0	0	0	0.014519	0	0.014519	0
ENST00000539962	ENSG00000128872	TMOD2	0	0	0.001684	0	0	0.014517	0	0.014517	0
ENST00000583696	ENSG00000141441	GAREM1	0	0	0	0	0	0.014512	0	0.014512	0
ENST00000378868	ENSG00000088766	CRLS1	0	0	0	0	0	0.014391	0	0.014391	0
ENST00000613899	ENSG00000219626	FAM228B	0.00031	1e-06	0	0	0.00177	0.014301	0	0.014301	5e-06
ENST00000646477	ENSG00000101266	CSNK2A1	0	0	0	0	0	0.014296	0	0.014296	0.001206
ENST00000244930	ENSG00000124939	SCGB2A1	0	0	0	0	0	0.014264	0	0.014264	0
ENST00000510776	ENSG00000109771	LRP2BP	0	0	0	0	0	0.014207	0.004502	0.014207	0
ENST00000553499	ENSG00000166888	STAT6	0	0	0	0	0.006068	0.014129	0	0.014129	0
ENST00000474994	ENSG00000173269	MMRN2	0	0	0.000559	0	0	0.014071	0	0.014071	0
ENST00000548043	ENSG00000135473	PAN2	0	0	0.002296	0	0	0.013883	0	0.013883	0
ENST00000434571	ENSG00000153029	MR1	0	0	0	0	0	0.013879	0	0.013879	0
ENST00000529302	ENSG00000010361	FUZ	0	0	0	0	0	0.013519	0	0.013519	0
ENST00000634842	ENSG00000282872	C1orf232	0	0	0	0	0	0.013419	0	0.013419	0
ENST00000276816	ENSG00000170631	ZNF16	0.002543	0	0	0	0	0.013398	0	0.013398	0.000295
ENST00000493325	ENSG00000243896	OR2A7	0	0	0	0	0	0.013292	0	0.013292	0
ENST00000650858	ENSG00000106617	PRKAG2	0	0	0	0	0.005799	0.013201	0	0.013201	0
ENST00000512320	ENSG00000164089	ETNPPL	0	0	0	0	0	0.013081	0	0.013081	0
ENST00000471895	ENSG00000132879	FBXO44	0	0	0	0	0	0.013065	0	0.013065	0
ENST00000650812	ENSG00000286105	AL353579.1	0	0	0	0	0	0.012917	0	0.012917	0
ENST00000526881	ENSG00000137699	TRIM29	0.001968	0	0	0	0	0.012822	0	0.012822	0
ENST00000333822	ENSG00000204880	KRTAP4-8	0	0.004581	0	0	0	0.012692	0	0.012692	0
ENST00000378789	ENSG00000101323	HAO1	0.004485	0	0	0	0	0.012664	0	0.012664	0
ENST00000374943	ENSG00000179344	HLA-DQB1	0	0	0	0	0	0.012636	0	0.012636	0.001044
ENST00000372873	ENSG00000166317	SYNPO2L	0	0	0	0	0	0.012359	0	0.012359	0
ENST00000616242	ENSG00000106633	GCK	0	0	0	0	0	0.011815	0	0.011815	0
ENST00000522294	ENSG00000171970	ZNF57	0	0	0	0	0	0.011783	0	0.011783	0.004626
ENST00000274793	ENSG00000146070	PLA2G7	0	0	0	0	0	0.011764	0	0.011764	0
ENST00000412517	ENSG00000167703	SLC43A2	0	0	0	0	0	0.011696	0	0.011696	0
ENST00000423490	ENSG00000068383	INPP5A	0	0	0	0	0	0.011654	0	0.011654	0
ENST00000649451	ENSG00000053438	NNAT	0	0	0	0	0	0.011569	0	0.011569	0
ENST00000284425	ENSG00000154262	ABCA6	0	0	0	0	0.001734	0.011554	0	0.011554	0
ENST00000454237	ENSG00000073803	MAP3K13	0	0	0	0	0	0.011517	0	0.011517	0.003196
ENST00000649256	ENSG00000267710	EDDM13	0	0	0	0	0	0.011411	0	0.011411	0
ENST00000432027	ENSG00000112559	MDFI	0	0	0	0	0	0.01129	0	0.01129	0
ENST00000560755	ENSG00000137821	LRRC49	0	0.002266	0	0	0	0.011281	0	0.011281	0
ENST00000370098	ENSG00000125531	FNDC11	0	0	0	0	0	0.011273	0	0.011273	0
ENST00000531524	ENSG00000168000	BSCL2	0	0	0	0.00463	0	0.011227	0	0.011227	0
ENST00000612149	ENSG00000162929	KIAA1841	0.00357	0.000425	0	0	0	0.011101	0	0.011101	4.6e-05
ENST00000373289	ENSG00000167094	TTC16	0	0	0	0	0	0.011062	0	0.011062	0
ENST00000522813	ENSG00000158806	NPM2	0	0	0	0	0	0.011058	0	0.011058	0
ENST00000478300	ENSG00000163630	SYNPR	0	0	0	0	0	0.011024	0	0.011024	0
ENST00000418018	ENSG00000157578	LCA5L	0	0	0	0	0	0.010997	0	0.010997	0
ENST00000586042	ENSG00000070388	FGF22	0	0	0	0	0	0.010989	0	0.010989	0
ENST00000525024	ENSG00000154359	LONRF1	1.7e-05	1.8e-05	5e-06	6e-06	7e-06	0.010981	9e-06	0.010981	1.1e-05
ENST00000494818	ENSG00000169255	B3GALNT1	0	0	0	0	0	0.010972	0	0.010972	0
ENST00000455341	ENSG00000184381	PLA2G6	0	0	0	0	0	0.010867	0	0.010867	0
ENST00000362089	ENSG00000198821	CD247	0	0	0	0	0	0.01082	0	0.01082	0
ENST00000270879	ENSG00000142748	FCN3	0	0	0	0	0	0.010802	0	0.010802	0
ENST00000406771	ENSG00000088367	EPB41L1	0	0	0	0	0	0.010765	0	0.010765	0
ENST00000648760	ENSG00000132535	DLG4	0	0	0	0	0	0.010742	0	0.010742	0
ENST00000518606	ENSG00000134824	FADS2	0	0	0	0	0	0.010683	0	0.010683	0
ENST00000419764	ENSG00000007384	RHBDF1	0	0	0	0	0	0.010615	0	0.010615	0
ENST00000374268	ENSG00000197245	FAM110D	0	0	0	0	0	0.0106	0	0.0106	0
ENST00000391587	ENSG00000212900	KRTAP3-2	0	0	0	0	0	0.010566	0	0.010566	0
ENST00000398547	ENSG00000121753	ADGRB2	0	0	0	0	0.0039	0.010531	0	0.010531	0
ENST00000382565	ENSG00000183765	CHEK2	0	0.003494	0	0	0	0.010496	0	0.010496	0
ENST00000568618	ENSG00000205336	ADGRG1	0	0	0	0	0	0.010393	0.00062	0.010393	0
ENST00000649487	ENSG00000127955	GNAI1	0	0	0	0	0	0.010386	0	0.010386	0
ENST00000469486	ENSG00000196482	ESRRG	0	0	0	0	0	0.010242	0	0.010242	0
ENST00000616975	ENSG00000084093	REST	0	0	0	0	0	0.010235	0	0.010235	0
ENST00000266395	ENSG00000139053	AC020613.1	0	0	0	0	0	0.010202	0	0.010202	0
ENST00000328404	ENSG00000219435	CATSPERZ	0	0	0	0	0	0.01018	0	0.01018	0
ENST00000431299	ENSG00000172159	FRMD3	0	0	0	0	0	0.010158	0	0.010158	0
ENST00000199708	ENSG00000086506	HBQ1	0	0	0	0	0	0.010069	0	0.010069	0
ENST00000381395	ENSG00000167244	IGF2	0.004116	0	0	0	0	0.010066	0.000531	0.010066	0
ENST00000426569	ENSG00000115194	SLC30A3	0	0	0	0	0	0.010057	0	0.010057	0
ENST00000391705	ENSG00000131845	ZNF304	0	0	0	0	0	0.009985	0	0.009985	0
ENST00000261207	ENSG00000058272	PPP1R12A	0.000517	0	0.000602	0.000993	0	0.009971	0.000333	0.009971	0.000293
ENST00000330807	ENSG00000158578	ALAS2	0	0	0	0	0	0.009928	0	0.009928	0
ENST00000299174	ENSG00000166143	PPP1R14D	0	0	0	0	0	0.009798	0	0.009798	0
ENST00000613244	ENSG00000204007	GLT6D1	0	0	0	0	0	0.009721	0	0.009721	0
ENST00000544059	ENSG00000130479	MAP1S	0	0	0	0	0	0.009688	0	0.009688	0
ENST00000374566	ENSG00000095203	EPB41L4B	0	0	0	0	0	0.009688	0	0.009688	0
ENST00000338325	ENSG00000121904	CSMD2	0	0	0	0	0	0.009608	0	0.009608	0
ENST00000618474	ENSG00000183878	UTY	0	0	0	0	0	0.009554	0	0.009554	0
ENST00000568898	ENSG00000140265	ZSCAN29	0	0	0	0	0	0.009532	0	0.009532	0
ENST00000456570	ENSG00000244255	AL645922.1	0	0	0	0	0	0.009506	0	0.009506	0
ENST00000642581	ENSG00000104413	ESRP1	0	0	0	0	0	0.009414	0	0.009414	0.00148
ENST00000514447	ENSG00000145826	LECT2	0	0	0	0	0	0.009401	0	0.009401	0
ENST00000613455	ENSG00000144550	CPNE9	0	0	0	0	0	0.009396	0	0.009396	0
ENST00000399496	ENSG00000154040	CABYR	0.003389	0	0	0	0	0.009383	0	0.009383	0
ENST00000644238	ENSG00000156313	RPGR	0	0	0	0.000197	0	0.009372	0	0.009372	0
ENST00000545663	ENSG00000139182	CLSTN3	0.002048	0	0	0	0	0.009356	0	0.009356	0
ENST00000459722	ENSG00000133142	TCEAL4	0	0	0	0	0	0.009353	0	0.009353	0
ENST00000589140	ENSG00000184640	2021-09-09	0	0	0	0	0	0.009295	0	0.009295	0.000696
ENST00000521157	ENSG00000158806	NPM2	0	0	0	0	0	0.009285	0	0.009285	0
ENST00000515701	ENSG00000164128	NPY1R	0	0	0	0	0	0.009283	0	0.009283	0
ENST00000366981	ENSG00000162772	ATF3	0	0	0.000217	0	0	0.009235	0.000112	0.009235	0
ENST00000379959	ENSG00000134460	IL2RA	0	0	0	0	0	0.009123	0	0.009123	0.002269
ENST00000339996	ENSG00000187616	MYMK	0	0	0	0	0	0.009067	0	0.009067	0
ENST00000343684	ENSG00000189134	NKAPL	0	0	0	0	0	0.009051	0	0.009051	0
ENST00000473520	ENSG00000230268	SSU72P8	0	0	0	0	0	0.009044	0	0.009044	0
ENST00000438270	ENSG00000100243	CYB5R3	0	0	0	0	0	0.009028	0	0.009028	0
ENST00000328782	ENSG00000183310	OR2T34	0	0	0	0	0	0.008938	0	0.008938	0
ENST00000530069	ENSG00000132746	ALDH3B2	0	0	0	0	0	0.008891	0	0.008891	0
ENST00000373003	ENSG00000124196	GTSF1L	0	0	0	0	0	0.008883	0	0.008883	0
ENST00000431365	ENSG00000171136	RLN3	0	0	0	0	0	0.008879	0	0.008879	0
ENST00000402054	ENSG00000119787	ATL2	0	0	0	0	0	0.008827	0	0.008827	0
ENST00000442999	ENSG00000184389	A3GALT2	0	0	0	0	0	0.008797	0	0.008797	0
ENST00000463663	ENSG00000107679	PLEKHA1	0	0	0	0	0	0.008794	0	0.008794	0
ENST00000348801	ENSG00000135679	MDM2	0	0	0	0	0	0.008718	0	0.008718	0
ENST00000414854	ENSG00000100364	KIAA0930	0	0	0	0	0	0.008703	0	0.008703	0
ENST00000559517	ENSG00000128918	ALDH1A2	0	0	0	0	0	0.00869	0	0.00869	0
ENST00000345847	ENSG00000198090	KRTAP4-6	0	0	0	0	0	0.008624	0	0.008624	0
ENST00000432728	ENSG00000188687	SLC4A5	0	0	0	0	0	0.008602	0	0.008602	0
ENST00000613603	ENSG00000103175	WFDC1	0	0	0	0	0	0.008601	0	0.008601	0
ENST00000415641	ENSG00000196427	NBPF4	0	0	0	0	0	0.008577	0	0.008577	0
ENST00000535348	ENSG00000103723	AP3B2	0	0	0	0	0	0.008528	0	0.008528	0
ENST00000522693	ENSG00000113249	HAVCR1	0	0	0	0	0	0.008505	0	0.008505	0
ENST00000640805	ENSG00000284306	SSU72P2	0	0	0	0	0	0.008452	0	0.008452	0
ENST00000602836	ENSG00000134899	ERCC5	0	0	0	0	0	0.008429	0	0.008429	0
ENST00000235739	ENSG00000117090	SLAMF1	0.000237	0	0	0	0	0.0084	0	0.0084	0
ENST00000546355	ENSG00000178882	RFLNA	0	0	0	0	0	0.008308	0	0.008308	0.003205
ENST00000373564	ENSG00000182866	LCK	0	0	0	0	0	0.008227	0	0.008227	0
ENST00000523300	ENSG00000158856	DMTN	0	0	0	0	0	0.008227	0	0.008227	0
ENST00000553493	ENSG00000131981	LGALS3	0	0	0	0	0	0.008179	0	0.008179	0
ENST00000414683	ENSG00000196189	SEMA4A	0	0	0	0	0	0.008046	0	0.008046	0
ENST00000610474	ENSG00000166313	APBB1	0.003429	1.3e-05	0	0	0	0.008041	1.7e-05	0.008041	0
ENST00000452832	ENSG00000154978	VOPP1	0	0	0	0	0	0.008034	0	0.008034	0
ENST00000546241	ENSG00000171860	C3AR1	0	0	0	0	0	0.008012	0	0.008012	0
ENST00000557598	ENSG00000188488	SERPINA5	0	0	0	0	0	0.007998	0	0.007998	0
ENST00000332378	ENSG00000182591	KRTAP11-1	0	0	0	0	0	0.007943	0	0.007943	0
ENST00000447219	ENSG00000042493	CAPG	0	0	0	0	0.003207	0.007874	0	0.007874	0
ENST00000428261	ENSG00000168314	MOBP	0	0	0	0	0	0.007865	0	0.007865	0
ENST00000337107	ENSG00000219073	CELA3B	0	0	0	0	0	0.007855	0	0.007855	0
ENST00000283225	ENSG00000153230	OR14K1	0	0	0	0	0	0.007849	0	0.007849	0
ENST00000592587	ENSG00000196605	ZNF846	0	0.000111	0	0	0	0.007815	0	0.007815	0
ENST00000471111	ENSG00000114204	SERPINI2	0	0	0	0	0	0.007758	0	0.007758	0
ENST00000553971	ENSG00000198208	RPS6KL1	0	0	0	0	0	0.007746	0	0.007746	0
ENST00000421126	ENSG00000100280	AP1B1	0.000234	0	0	0	0	0.00773	0	0.00773	0
ENST00000366473	ENSG00000196944	OR2T4	0	0	0	0	0	0.007728	0	0.007728	0
ENST00000304954	ENSG00000171209	CSN3	0	0	0	0	0	0.007724	0	0.007724	0
ENST00000380524	ENSG00000124570	SERPINB6	0	0	0	0	0	0.007696	0	0.007696	0
ENST00000484657	ENSG00000100226	GTPBP1	0	0	0	0	0	0.007639	0	0.007639	0
ENST00000255945	ENSG00000133574	GIMAP4	0	0	0	0	0	0.007627	0	0.007627	0
ENST00000543747	ENSG00000127334	DYRK2	0	0	0	0	0	0.007479	0	0.007479	0
ENST00000351270	ENSG00000148702	HABP2	0	0	0	0	0	0.007454	0	0.007454	0
ENST00000524542	ENSG00000284438	SSU72P7	0	0	0	0	0	0.007396	0	0.007396	0
ENST00000558331	ENSG00000090661	CERS4	0	0	0	0	0	0.007364	0	0.007364	0
ENST00000508273	ENSG00000196455	PIK3R4	0	0	0	0	0	0.007303	0	0.007303	0
ENST00000396009	ENSG00000101096	NFATC2	0	0	0.001114	0	0	0.007262	0	0.007262	0
ENST00000601011	ENSG00000074181	NOTCH3	0	0	0	0	0	0.007249	0	0.007249	0
ENST00000343318	ENSG00000240720	LRRD1	0	0	0	0	0	0.007239	0	0.007239	0
ENST00000295728	ENSG00000163499	CRYBA2	0	0	0	0	0	0.007221	0	0.007221	0
ENST00000395809	ENSG00000198915	RASGEF1A	0	0	0	0	0	0.007217	0	0.007217	0
ENST00000448952	ENSG00000134376	CRB1	0	0	0	0	0	0.007194	0	0.007194	0
ENST00000409230	ENSG00000182600	SNORC	0	0	0	0	0	0.007111	0	0.007111	0
ENST00000561831	ENSG00000196628	TCF4	0	0	0	0	0	0.007095	0	0.007095	0.000289
ENST00000570565	ENSG00000154975	CA10	0	0	0	0	0	0.007092	0	0.007092	0
ENST00000265922	ENSG00000078725	BRINP1	0	0	0	0	0	0.007001	0	0.007001	0
ENST00000472095	ENSG00000065809	FAM107B	0.002932	0	0	0	0	0.006873	0	0.006873	0
ENST00000642978	ENSG00000144659	SLC25A38	0	0	0	0	0	0.006863	0	0.006863	0
ENST00000397060	ENSG00000124564	SLC17A3	0	0	0	0	0	0.006843	0	0.006843	0
ENST00000575663	ENSG00000070366	SMG6	0	0	0	0.003076	0	0.006805	0	0.006805	0
ENST00000625203	ENSG00000279395	OR5L1	0	0	0	0	0	0.006682	0	0.006682	0
ENST00000638698	ENSG00000266173	STRADA	0	0	0	0	0	0.006643	0	0.006643	0
ENST00000414490	ENSG00000138380	CARF	0	0	0	0	0	0.006557	0	0.006557	0
ENST00000300098	ENSG00000166856	GPR182	0	0.002736	0	0	0	0.006449	0	0.006449	0
ENST00000307003	ENSG00000170279	C7orf33	0	0	0	0	0	0.006433	0	0.006433	0
ENST00000248076	ENSG00000127533	F2RL3	0	0	0	0	0	0.006407	0	0.006407	0
ENST00000376434	ENSG00000172159	FRMD3	0	0	0	0	0	0.006247	0	0.006247	0
ENST00000236693	ENSG00000118004	COLEC11	0	0	0	0	0	0.006192	0	0.006192	0
ENST00000596349	ENSG00000087076	HSD17B14	0	0	0	0	0	0.006181	0	0.006181	0
ENST00000648651	ENSG00000197879	MYO1C	0	0	0	0	0	0.006174	0	0.006174	0
ENST00000454947	ENSG00000130147	SH3BP4	0	0	0	0	0	0.006126	0	0.006126	0
ENST00000442488	ENSG00000128610	FEZF1	0	0	0	0	0	0.006092	0	0.006092	0
ENST00000392235	ENSG00000181036	FCRL6	0	0	0	0	0	0.006088	0	0.006088	0
ENST00000560947	ENSG00000128463	EMC4	0.00019	0	0	0	0	0.006015	0	0.006015	0
ENST00000536551	ENSG00000230873	STMND1	0	0	0	0	0	0.005962	0	0.005962	0
ENST00000377311	ENSG00000181778	TMEM252	0	0	0	0	0	0.005957	0	0.005957	0
ENST00000522796	ENSG00000176256	HMGB4	0	0	0	0	0	0.005922	0	0.005922	0
ENST00000294973	ENSG00000162882	HAAO	0	0	0	0	0	0.005905	0	0.005905	0
ENST00000398661	ENSG00000146151	HMGCLL1	0	0	0	0	0	0.005859	0	0.005859	0
ENST00000320185	ENSG00000107831	FGF8	0	0	0	0	0	0.005852	0	0.005852	0
ENST00000641627	ENSG00000170929	OR1M1	0	0	0	0	0	0.005852	0	0.005852	0
ENST00000234798	ENSG00000116176	TPSG1	0	0	0	0	0	0.005757	0	0.005757	0
ENST00000325812	ENSG00000176605	C14orf177	0	0	0	0	0	0.005754	0	0.005754	0
ENST00000628822	ENSG00000196535	MYO18A	0	0	0	0	0	0.005742	0	0.005742	0
ENST00000419583	ENSG00000196289	BECN2	0	0	0	0	0	0.005723	0	0.005723	0
ENST00000633844	ENSG00000214897	PNMA6E	0	0	0	0	0	0.005714	0	0.005714	0
ENST00000389983	ENSG00000188263	IL17REL	0	0	0	0	0.00099	0.005712	0.001278	0.005712	0
ENST00000423495	ENSG00000134324	LPIN1	0	0	0	0	0	0.005701	0	0.005701	0
ENST00000461609	ENSG00000144891	AGTR1	0	8e-06	0	0	0	0.005695	0	0.005695	0
ENST00000512564	ENSG00000109339	MAPK10	0	0	0	0	0	0.005681	0	0.005681	0
ENST00000506491	ENSG00000146021	KLHL3	0.000208	0	0	0.000266	0	0.005636	0.000105	0.005636	0
ENST00000552526	ENSG00000089127	OAS1	0	0	0	0	0	0.005617	0	0.005617	0
ENST00000401724	ENSG00000131668	BARX1	0	0	0	0	0	0.005606	0	0.005606	0
ENST00000354914	ENSG00000168079	SCARA5	0	0	0	0	0	0.005603	0	0.005603	0
ENST00000616054	ENSG00000275385	CCL18	0	0	0	0	0	0.005602	0	0.005602	0
ENST00000334888	ENSG00000187049	TMEM216	0	0	0	0	0	0.005594	0	0.005594	0
ENST00000392984	ENSG00000152076	CCDC74B	0	0	0	0	0	0.005589	0	0.005589	0
ENST00000574814	ENSG00000262874	C19orf84	0	0	0	0	0	0.005556	0	0.005556	0
ENST00000395542	ENSG00000106078	COBL	0	0	0	0	0	0.005548	0.001229	0.005548	0
ENST00000417956	ENSG00000048740	CELF2	0	0	0	0.000621	0	0.005529	0	0.005529	0
ENST00000650630	ENSG00000150672	DLG2	0	0	0	0	0	0.0055	0	0.0055	0
ENST00000642459	ENSG00000073584	SMARCE1	0	0	0	0	0	0.005497	0	0.005497	0
ENST00000489100	ENSG00000065809	FAM107B	0	0	0	0	0	0.005484	0	0.005484	0
ENST00000435873	ENSG00000285772	AC000120.2	0	0	0	0	0	0.005469	0	0.005469	0
ENST00000461727	ENSG00000187017	ESPN	0	0	0	0	0	0.005465	0	0.005465	0
ENST00000519905	ENSG00000123992	DNPEP	0	0	0	0	0	0.00544	0	0.00544	0
ENST00000369796	ENSG00000143093	STRIP1	0	0	0	0	0	0.00543	0	0.00543	0
ENST00000525263	ENSG00000186474	KLK12	0	0	0	0	0	0.005428	0	0.005428	0
ENST00000439628	ENSG00000235109	ZSCAN31	0	0	0	0	0	0.005371	0	0.005371	0
ENST00000568360	ENSG00000137817	PARP6	0	0	0	0	0	0.005353	0	0.005353	0
ENST00000435602	ENSG00000118263	KLF7	0	0	0	0	0	0.005349	0.000208	0.005349	0.001612
ENST00000479765	ENSG00000174776	WDR49	0	0	0	0	0	0.005278	0	0.005278	0
ENST00000381998	ENSG00000038945	MSR1	0	0	0	0	0	0.005249	0	0.005249	0
ENST00000377939	ENSG00000158286	RNF207	0	0	0	0	0	0.005191	0	0.005191	0
ENST00000379651	ENSG00000184368	MAP7D2	0.001657	0	0	0	0	0.00519	0	0.00519	0
ENST00000371402	ENSG00000203989	RHOXF2B	0	0	0	0	0	0.00518	0	0.00518	0
ENST00000393897	ENSG00000143954	REG3G	0	0	0	0	0	0.005114	0	0.005114	0
ENST00000336915	ENSG00000141293	SKAP1	0	0	0	0	0	0.005032	0	0.005032	0
ENST00000506520	ENSG00000006283	CACNA1G	0	0	0	0	0	0.005018	0	0.005018	0
ENST00000622030	ENSG00000277893	SRD5A2	0	0	0	0	0	0.004957	0	0.004957	0
ENST00000586133	ENSG00000214456	PLIN5	0	0	0	0	0	0.004887	0	0.004887	0
ENST00000645590	ENSG00000285010	OOSP4A	0	0	0	0	0	0.004857	0	0.004857	0
ENST00000573580	ENSG00000122390	NAA60	0	0	0	0	0	0.004847	0	0.004847	0
ENST00000577200	ENSG00000073350	LLGL2	0	0	0	0.001351	0	0.004754	0	0.004754	0
ENST00000232892	ENSG00000114771	AADAC	0	0	0	0	0	0.004745	0	0.004745	0
ENST00000308182	ENSG00000176092	CRYBG2	0	0	0	0	0	0.004744	0	0.004744	0.001797
ENST00000374761	ENSG00000076864	RAP1GAP	0	0	0	0	0	0.004715	0	0.004715	0
ENST00000652756	ENSG00000128656	CHN1	0.000989	0	0	0	0	0.004697	0	0.004697	0
ENST00000486603	ENSG00000105880	DLX5	0	0	0	0	0	0.004696	0	0.004696	0
ENST00000587521	ENSG00000105220	GPI	0	0	0	0.000458	0	0.004588	0	0.004588	0
ENST00000535043	ENSG00000011677	GABRA3	0	0	0	0	0	0.004546	0	0.004546	0
ENST00000563383	ENSG00000006210	CX3CL1	0	0	0	0	0	0.004478	0	0.004478	0
ENST00000518632	ENSG00000174417	TRHR	0	0	0	0	0	0.004468	0	0.004468	0
ENST00000368806	ENSG00000182898	TCHHL1	0	0	0	0	0	0.004458	0	0.004458	0
ENST00000507330	ENSG00000196455	PIK3R4	0	0	0	0	0	0.004416	0	0.004416	0
ENST00000520835	ENSG00000104365	IKBKB	0	0	0	0	0	0.004414	0	0.004414	0
ENST00000537041	ENSG00000112531	QKI	0	0	0	0	0	0.00441	0	0.00441	0
ENST00000370456	ENSG00000183347	GBP6	0	0	0	0	0	0.004405	0	0.004405	0
ENST00000355727	ENSG00000186063	AIDA	0	0	0	0	0	0.004391	0	0.004391	0
ENST00000591230	ENSG00000074657	ZNF532	0	0	0	0	0	0.004387	0.0008	0.004387	0
ENST00000482018	ENSG00000121769	FABP3	0	0	0	0	0	0.004374	0	0.004374	0
ENST00000652534	ENSG00000172936	MYD88	0	0	0	0	0	0.004357	0	0.004357	0
ENST00000559792	ENSG00000185033	SEMA4B	0	0	0	0	0	0.004311	0	0.004311	0
ENST00000344129	ENSG00000169551	CT55	0	0	0	0	0	0.004292	0	0.004292	0
ENST00000450319	ENSG00000115594	IL1R1	0	0	0	0	0	0.004278	0	0.004278	0
ENST00000330436	ENSG00000197838	CYP2A13	0	0	0	0	0	0.004265	0	0.004265	0
ENST00000370418	ENSG00000120054	CPN1	0	0	0	0	0	0.004217	0	0.004217	0
ENST00000603276	ENSG00000062282	DGAT2	0	0	0	0	0	0.00417	0	0.00417	0
ENST00000543831	ENSG00000203859	HSD3B2	0	0	0	0	0	0.00416	0	0.00416	0
ENST00000644529	ENSG00000284873	OOSP1	0	0	0	0	0	0.00414	0	0.00414	0.000955
ENST00000356113	ENSG00000166035	LIPC	0	0	0	0	0	0.004114	0	0.004114	0
ENST00000470198	ENSG00000160781	PAQR6	0	0.000343	0	0	0	0.004075	0	0.004075	0
ENST00000579129	ENSG00000197971	MBP	0	0	0	0	0	0.004025	0	0.004025	0
ENST00000604604	ENSG00000133131	MORC4	0	0	0	0	0	0.004025	0	0.004025	0
ENST00000511747	ENSG00000087266	SH3BP2	0	0	0	0	0	0.00402	0	0.00402	0
ENST00000217740	ENSG00000101695	RNF125	0	0.001669	0	0	0	0.003993	0	0.003993	0
ENST00000409058	ENSG00000169507	SLC38A11	0	0	0	0	0	0.003979	0	0.003979	0
ENST00000391496	ENSG00000212807	OR2A42	0	0	0	0	0	0.003975	0	0.003975	0
ENST00000408951	ENSG00000221970	OR2A1	0	0	0	0	0	0.003975	0	0.003975	0
ENST00000359918	ENSG00000167311	ART5	0	0	0	0	0	0.003936	0	0.003936	0
ENST00000417547	ENSG00000131808	FSHB	0	0	0	0	0	0.003924	0	0.003924	0
ENST00000342995	ENSG00000187690	CXorf67	0	0	0	0	0	0.003912	0	0.003912	0
ENST00000486858	ENSG00000154917	RAB6B	0	0	0	0	0.000349	0.003877	0	0.003877	0
ENST00000611016	ENSG00000168477	TNXB	0	0	0	0	0	0.00387	0	0.00387	0.000968
ENST00000586445	ENSG00000128789	PSMG2	0	0	0	0	0	0.003853	0	0.003853	0
ENST00000513214	ENSG00000152942	RAD17	0	0.001709	0	0	0	0.003803	0	0.003803	0
ENST00000260228	ENSG00000137674	MMP20	0	0	0	0	0	0.003786	0	0.003786	0
ENST00000508916	ENSG00000189127	ANKRD34B	0	0	0	0	0	0.003736	0	0.003736	0
ENST00000249499	ENSG00000128709	HOXD9	0	0	0	0	0	0.003726	0	0.003726	0
ENST00000593867	ENSG00000012124	CD22	0	0	0	0	0	0.003719	0	0.003719	0
ENST00000249501	ENSG00000128710	HOXD10	0	0	0	0	0	0.003704	0	0.003704	0
ENST00000644458	ENSG00000197283	SYNGAP1	0	0	0	0	0	0.003703	0	0.003703	0
ENST00000366810	ENSG00000185155	MIXL1	0	0	0	0	0	0.003699	0	0.003699	0
ENST00000404377	ENSG00000120337	TNFSF18	0	0	0	0	0	0.003694	0	0.003694	0
ENST00000411688	ENSG00000135929	CYP27A1	0	0	0	0	0	0.00368	0	0.00368	0
ENST00000260404	ENSG00000137843	PAK6	0	0	0	0	0	0.00366	0	0.00366	0
ENST00000616088	ENSG00000118513	MYB	0.00099	0	0	0	0	0.003629	0	0.003629	0
ENST00000431480	ENSG00000136111	TBC1D4	0	0	0	0	0	0.003626	0	0.003626	0
ENST00000391795	ENSG00000197619	ZNF615	0	0	0	0.000697	0	0.003613	0	0.003613	0
ENST00000290585	ENSG00000159409	CELF3	0	0	0	0	0	0.003579	0	0.003579	0
ENST00000299338	ENSG00000166262	FAM227B	4e-05	0	0	0	0	0.003558	0	0.003558	0
ENST00000599174	ENSG00000267909	CCDC177	0	0	0	0	0	0.003524	0	0.003524	0
ENST00000517600	ENSG00000158856	DMTN	0	0	0	0	0	0.003505	0	0.003505	0
ENST00000539526	ENSG00000137726	FXYD6	0	0	0	0	0	0.003479	0	0.003479	0
ENST00000382376	ENSG00000186458	DEFB132	0	0	0	0	0	0.003477	0	0.003477	0
ENST00000388827	ENSG00000198865	CCDC152	0	0	0	0	0	0.003476	0	0.003476	0
ENST00000361669	ENSG00000198822	GRM3	0	0	0	0	0	0.003458	0	0.003458	0
ENST00000472026	ENSG00000178075	GRAMD1C	0	0	0	0	0	0.003456	0	0.003456	0
ENST00000298231	ENSG00000165462	PHOX2A	0	0	0	0	0	0.003448	0	0.003448	0
ENST00000479209	ENSG00000120742	SERP1	0	0	0	0	0	0.003437	0	0.003437	0
ENST00000398285	ENSG00000120088	CRHR1	0	0	0	0	0	0.003432	0	0.003432	0
ENST00000358394	ENSG00000079385	CEACAM1	0	0	0	0	0	0.003422	0	0.003422	0
ENST00000218032	ENSG00000101916	TLR8	0	0	0	0	0	0.003419	0	0.003419	0
ENST00000537147	ENSG00000213088	ACKR1	0	0	0	0	0	0.003331	0	0.003331	0
ENST00000380075	ENSG00000138100	TRIM54	0	0	0	0	0	0.003318	0	0.003318	0
ENST00000277905	ENSG00000148704	VAX1	0	0	0	0	0	0.003301	0	0.003301	0
ENST00000373359	ENSG00000186675	MAGEE2	0	0	0	0	0	0.003298	0	0.003298	0
ENST00000260191	ENSG00000149305	HTR3B	0	0	0	0	0	0.003279	0	0.003279	0
ENST00000335496	ENSG00000187144	SPATA21	0	0	0	0	0	0.003258	0	0.003258	0
ENST00000558415	ENSG00000090487	SPG21	0	0	0	0	0	0.003255	0	0.003255	0
ENST00000392621	ENSG00000178789	CD300LB	0	0	0	0	0	0.003232	0	0.003232	0
ENST00000204604	ENSG00000090539	CHRD	0	0	0	0	0	0.003229	0	0.003229	0
ENST00000445546	ENSG00000151690	MFSD6	0	0	0	0	0	0.003221	0	0.003221	0
ENST00000399583	ENSG00000157927	RADIL	0	0	0	0	0	0.00322	0	0.00322	0
ENST00000297894	ENSG00000165188	RNF183	0	0	0	0	0	0.003202	0	0.003202	0
ENST00000406958	ENSG00000144504	ANKMY1	0	0	0	0	0	0.003196	0	0.003196	0
ENST00000287907	ENSG00000157219	HTR5A	0	0	0	0	0	0.003181	0	0.003181	0
ENST00000301773	ENSG00000167994	RAB3IL1	0	0	0	0	0	0.003177	0	0.003177	0
ENST00000644939	ENSG00000158321	AUTS2	0	0	0	0	0	0.003176	0	0.003176	0
ENST00000597687	ENSG00000125731	SH2D3A	0	0	0	0	0	0.003166	0	0.003166	0
ENST00000343257	ENSG00000188037	CLCN1	0	0	0	0	0	0.003159	0	0.003159	0
ENST00000446737	ENSG00000077264	PAK3	0	0	0	0	0	0.003148	0	0.003148	0.001082
ENST00000459955	ENSG00000196482	ESRRG	0	0	0	0	0	0.003143	0	0.003143	0
ENST00000380637	ENSG00000185437	SH3BGR	0	0	0	0	0	0.003129	0	0.003129	0.000488
ENST00000458432	ENSG00000118194	TNNT2	0	0	0	0	0	0.003116	0	0.003116	0
ENST00000542434	ENSG00000012779	ALOX5	0	0	0	0	0	0.003103	0	0.003103	0
ENST00000445132	ENSG00000121807	CCR2	0	0	0	0	0	0.003098	0	0.003098	0
ENST00000298738	ENSG00000165837	ERICH6B	0	0.000591	0	0	0	0.003064	0	0.003064	0
ENST00000215368	ENSG00000099617	EFNA2	0	0	0	0	0	0.00306	0	0.00306	0
ENST00000630288	ENSG00000144559	TAMM41	0	0	0	0	0	0.003052	0	0.003052	0.000941
ENST00000645481	ENSG00000137273	FOXF2	0	0	0	0	0	0.003026	0	0.003026	0
ENST00000641244	ENSG00000174667	OR7D4	0	0	0	0	0	0.002986	0	0.002986	0
ENST00000190165	ENSG00000064218	DMRT3	0	0	0	0	0	0.002975	0	0.002975	0
ENST00000424747	ENSG00000132517	SLC52A1	0	0	0	0	0	0.002956	0	0.002956	0
ENST00000283871	ENSG00000113924	HGD	0	0	0	0	0	0.002954	0	0.002954	0
ENST00000340147	ENSG00000185056	C5orf47	0	0	0	0	0	0.002954	0	0.002954	0
ENST00000377934	ENSG00000147113	DIPK2B	0	0	0	0	0	0.002951	0	0.002951	0
ENST00000641417	ENSG00000204700	OR2J2	0	0	0	0	0	0.002935	0	0.002935	0
ENST00000648622	ENSG00000150672	DLG2	0	0	0	0	0	0.002914	0	0.002914	0
ENST00000217420	ENSG00000101438	SLC32A1	0	0	0	0	0	0.002889	0	0.002889	0
ENST00000308731	ENSG00000010671	BTK	0	0	0	0	0	0.002887	0	0.002887	0
ENST00000419716	ENSG00000137573	SULF1	0	0	0	0	0	0.002881	0	0.002881	0
ENST00000304236	ENSG00000172476	RAB40A	0	0	0	0	0	0.002838	0	0.002838	0
ENST00000533940	ENSG00000175274	TP53I11	0	0	0	0	0	0.002824	0	0.002824	0
ENST00000328278	ENSG00000185028	LRRC14B	0	0	0	0	0	0.002817	0	0.002817	0
ENST00000502483	ENSG00000159674	SPON2	0	0	0	0	0	0.002771	0	0.002771	0
ENST00000426584	ENSG00000107816	LZTS2	0	0	0	0	0	0.00276	0	0.00276	0
ENST00000569158	ENSG00000205336	ADGRG1	0	0	0	0	0	0.002742	0	0.002742	0
ENST00000627399	ENSG00000228486	C2orf92	0	0	0	0	0	0.002742	0	0.002742	0
ENST00000376302	ENSG00000095777	MYO3A	0	0	0	0	0	0.002724	0	0.002724	0
ENST00000357206	ENSG00000157077	ZFYVE9	2.8e-05	1e-05	0	0	0	0.002711	0	0.002711	0
ENST00000623907	ENSG00000279514	OR4C16	0	0	0	0	0	0.002703	0	0.002703	0
ENST00000567175	ENSG00000125170	DOK4	0	0	0	0	0.000692	0.002696	0	0.002696	0.000422
ENST00000576742	ENSG00000167723	TRPV3	0	0	0	0	0	0.002682	0	0.002682	0
ENST00000537657	ENSG00000112096	SOD2	0	0	0	0	0	0.002664	0	0.002664	0
ENST00000584670	ENSG00000082397	EPB41L3	0	0	0	0	0	0.00265	0	0.00265	0
ENST00000301305	ENSG00000147804	SLC39A4	0	0	0	0	0	0.002635	0.00056	0.002635	0
ENST00000526929	ENSG00000236125	USP17L4	0	0	0	0	0	0.002592	0	0.002592	0
ENST00000256404	ENSG00000134020	PEBP4	0	0	0	0	0	0.002585	0	0.002585	0
ENST00000229335	ENSG00000111732	AICDA	0	0	0	0	0	0.002584	0	0.002584	0
ENST00000416585	ENSG00000148158	SNX30	0	0	0	0	0	0.002573	0	0.002573	0
ENST00000379044	ENSG00000004848	ARX	0	0	0	0	0	0.002564	0	0.002564	0
ENST00000517781	ENSG00000147655	RSPO2	0	0	0	0	0	0.002546	0	0.002546	0
ENST00000548262	ENSG00000135678	CPM	0	0	0	0	0	0.002544	0	0.002544	0.000317
ENST00000381241	ENSG00000196433	ASMT	0	0	0	0	0	0.002543	0	0.002543	0
ENST00000530443	ENSG00000232268	OR52I1	0.000665	0	0	0	0	0.002505	0	0.002505	0
ENST00000613006	ENSG00000273749	CYFIP1	0	0	0	0	0	0.0025	0	0.0025	0
ENST00000216177	ENSG00000100341	PNPLA5	0	0	0	0	0	0.0025	0	0.0025	0
ENST00000354536	ENSG00000112562	SMOC2	0	0	0	0	0	0.002489	0	0.002489	0
ENST00000328656	ENSG00000157551	KCNJ15	0	0	0	0	0	0.00247	0	0.00247	0
ENST00000592953	ENSG00000179873	NLRP11	0	0	0	0	0	0.002457	0	0.002457	0
ENST00000373972	ENSG00000123992	DNPEP	0	0	0	0	0	0.002451	0	0.002451	0
ENST00000341761	ENSG00000148225	WDR31	0	0	0	0	0	0.00245	0	0.00245	0
ENST00000352418	ENSG00000187848	P2RX2	0	0	0	0	0	0.00237	0	0.00237	0
ENST00000318336	ENSG00000156413	FUT6	0	0	0	0	0	0.002364	0	0.002364	0
ENST00000326035	ENSG00000177453	NIM1K	0	0	0	0	0	0.002363	0	0.002363	0
ENST00000445281	ENSG00000188729	OSTN	0	0	0	0	0	0.002356	0	0.002356	0
ENST00000168712	ENSG00000075388	FGF4	0	0.000958	0	0	0	0.002343	0	0.002343	0
ENST00000530484	ENSG00000225327	USP17L3	0	0	0	0	0	0.002328	0	0.002328	0
ENST00000354957	ENSG00000198093	ZNF649	0	0	0	0	0	0.002324	0	0.002324	0
ENST00000503525	ENSG00000250366	TUNAR	0	0	0	0	0	0.00232	0	0.00232	0
ENST00000476257	ENSG00000114204	SERPINI2	0	0	0	0	0	0.002319	0	0.002319	0
ENST00000473779	ENSG00000163947	ARHGEF3	0	0	0	0	0	0.002254	0	0.002254	0
ENST00000376110	ENSG00000204482	LST1	0	0	0	0	0	0.002244	0	0.002244	0
ENST00000579794	ENSG00000141433	ADCYAP1	0	0	0	0	0	0.002217	0	0.002217	0
ENST00000620116	ENSG00000186446	ZNF501	0	0	0	0	0	0.002212	0	0.002212	0
ENST00000375579	ENSG00000188312	CENPP	0	0	0	0	0	0.002199	0	0.002199	0
ENST00000592594	ENSG00000141524	TMC6	0	0	0	0	0	0.002196	0	0.002196	0
ENST00000369470	ENSG00000134256	CD101	0	0	0	0	0	0.002188	0	0.002188	0
ENST00000336708	ENSG00000221926	TRIM16	0	0	0	0	0	0.002138	0	0.002138	0
ENST00000368755	ENSG00000196805	SPRR2B	0	0	0	0	0	0.002124	0	0.002124	0
ENST00000613858	ENSG00000197535	MYO5A	0	0	0	0	0	0.002123	0	0.002123	4.1e-05
ENST00000560164	ENSG00000140199	SLC12A6	0.000568	0	0	0	0	0.002117	0	0.002117	0
ENST00000427411	ENSG00000130234	ACE2	0	0	0	0	0	0.002115	0	0.002115	0
ENST00000312319	ENSG00000135374	ELF5	0	0	0	0	0	0.002111	0	0.002111	0
ENST00000340329	ENSG00000156042	CFAP70	0	0	0	0	0	0.002095	0	0.002095	0
ENST00000488800	ENSG00000155465	SLC7A7	0	0	0	0	0	0.002094	0	0.002094	0
ENST00000234816	ENSG00000116194	ANGPTL1	0	0	0	0	0	0.002093	0	0.002093	0
ENST00000262138	ENSG00000075461	CACNG4	0	0	0	0	0	0.00207	0	0.00207	0
ENST00000333813	ENSG00000184811	TRARG1	0	0	0	0	0	0.002067	0	0.002067	0
ENST00000475017	ENSG00000164867	NOS3	0	0	0	0	0	0.002033	0	0.002033	0
ENST00000637017	ENSG00000124203	ZNF831	0	0	0	0	0	0.002032	0	0.002032	0
ENST00000425629	ENSG00000105492	SIGLEC6	0	0	0	0	0	0.002013	0	0.002013	0
ENST00000329758	ENSG00000168930	TRIM49	0	0	0	0	0	0.002012	0	0.002012	0
ENST00000649282	ENSG00000143278	F13B	0	0	0	0.000277	0	0.002008	0	0.002008	0
ENST00000292301	ENSG00000121807	CCR2	0	0	0	0	0	0.002007	0	0.002007	0
ENST00000439485	ENSG00000146039	SLC17A4	0	0	0	0	0	0.002005	0	0.002005	0
ENST00000218006	ENSG00000101890	GUCY2F	0	0	0	0	0	0.001997	0	0.001997	0
ENST00000519067	ENSG00000022567	SLC45A4	0	0	0	0	0	0.001982	0	0.001982	0
ENST00000409868	ENSG00000204843	DCTN1	0	0	0	0	0	0.001977	0	0.001977	0
ENST00000442974	ENSG00000168702	LRP1B	0	0	0	0	0	0.001968	0	0.001968	0
ENST00000324938	ENSG00000072163	LIMS2	0	0	0	0.000531	0	0.001938	0	0.001938	0
ENST00000640815	ENSG00000164199	ADGRV1	0	0	0	0	0	0.001919	0	0.001919	0
ENST00000651863	ENSG00000106278	PTPRZ1	0	0	0	0	0	0.001913	0	0.001913	0
ENST00000462307	ENSG00000124104	SNX21	0	0	0	0	0	0.001907	0	0.001907	0
ENST00000432730	ENSG00000165238	WNK2	0	0	0	0	0	0.001907	0	0.001907	0.000191
ENST00000523120	ENSG00000091879	ANGPT2	0	0	0	0	0	0.001894	0	0.001894	0
ENST00000375780	ENSG00000213719	CLIC1	0	0	0	0	0	0.001886	0	0.001886	0
ENST00000599216	ENSG00000188897	AC099489.1	0	0	0	0	0	0.001861	0	0.001861	0
ENST00000358415	ENSG00000151655	ITIH2	0	0	0	0	0	0.001854	0	0.001854	0
ENST00000359594	ENSG00000196539	OR2T3	0	0	0	0	0	0.001847	0	0.001847	0
ENST00000409878	ENSG00000213901	SLC23A3	0	0	0	0	0	0.001842	0	0.001842	0
ENST00000642046	ENSG00000184698	OR51M1	0	0	0	0	0	0.001813	0	0.001813	0
ENST00000626868	ENSG00000135624	CCT7	0	0	0	0.000575	0	0.001799	0	0.001799	0
ENST00000618005	ENSG00000166313	APBB1	0	0	0	0	0	0.001797	0	0.001797	0
ENST00000615244	ENSG00000153822	KCNJ16	0	0	0	0	0	0.00177	0	0.00177	0
ENST00000530862	ENSG00000165325	DEUP1	0	0	0	0	0	0.001758	0	0.001758	0.000244
ENST00000621119	ENSG00000148541	FAM13C	0	0	0	0	0	0.001688	0	0.001688	0
ENST00000553484	ENSG00000133958	UNC79	0	0	0.000288	0	0	0.00163	0	0.00163	0
ENST00000511577	ENSG00000181381	DDX60L	0	0	8e-05	0	0.000125	0.001609	0.000367	0.001609	1.4e-05
ENST00000575051	ENSG00000103415	HMOX2	0	0	0	0	0	0.001591	0	0.001591	0
ENST00000640403	ENSG00000164199	ADGRV1	0	0	0	0	0	0.001569	0	0.001569	0
ENST00000432564	ENSG00000196917	HCAR1	0	0	0	0	0	0.001556	0	0.001556	0
ENST00000262961	ENSG00000105278	ZFR2	0	0	0	0	0	0.001556	0	0.001556	0
ENST00000263050	ENSG00000118507	AKAP7	0	0	0	0	0	0.001555	0	0.001555	0
ENST00000641492	ENSG00000182613	OR2V2	0	0	0	0	0	0.001553	0	0.001553	0
ENST00000406590	ENSG00000103415	HMOX2	0	0	0	0	0	0.001549	0	0.001549	0
ENST00000425755	ENSG00000163808	KIF15	0	0	0	0	0	0.001523	0.000199	0.001523	0
ENST00000647854	ENSG00000118298	CA14	0	0	0	0	0	0.001522	0	0.001522	0
ENST00000294339	ENSG00000162367	TAL1	0	0	0	0	0	0.001483	0	0.001483	0
ENST00000590008	ENSG00000196381	ZNF781	0	0	0	0	0	0.001479	0	0.001479	0
ENST00000367175	ENSG00000170382	LRRN2	0	0	0	0	0	0.001473	0	0.001473	0
ENST00000523428	ENSG00000171970	ZNF57	0	0	0	0	0	0.001449	0	0.001449	0
ENST00000634527	ENSG00000172053	QARS	0	0	0	0	0	0.001445	0	0.001445	0
ENST00000622768	ENSG00000125675	GRIA3	0	0	0	0	0	0.001434	0	0.001434	0
ENST00000585708	ENSG00000151062	CACNA2D4	0	0	0	0	0.000155	0.00142	0	0.00142	0
ENST00000427802	ENSG00000168843	FSTL5	0	0	0	0	0	0.001419	0	0.001419	0
ENST00000532038	ENSG00000159314	ARHGAP27	0	0	0	0	0	0.001412	0	0.001412	0
ENST00000371236	ENSG00000173406	DAB1	0	0	0	0	0	0.0014	0	0.0014	0
ENST00000618999	ENSG00000196220	SRGAP3	0	0	0	0	0	0.001399	0	0.001399	0
ENST00000566428	ENSG00000135709	KIAA0513	0.000161	0	0	0	0	0.00137	0	0.00137	0
ENST00000378781	ENSG00000102445	RUBCNL	0	0	0	0	0	0.001369	0	0.001369	0
ENST00000512055	ENSG00000196353	CPNE4	0	0	0	0.000501	0	0.001366	0	0.001366	0
ENST00000560070	ENSG00000140455	AC007950.1	0	0	0	0.000171	0.000183	0.001365	0.000166	0.001365	0
ENST00000285850	ENSG00000155465	SLC7A7	0	0	0	0	0	0.001355	0	0.001355	0.000446
ENST00000651430	ENSG00000169255	B3GALNT1	0	0	0.000337	0	0	0.001351	6.5e-05	0.001351	0
ENST00000534111	ENSG00000137648	TMPRSS4	0	0	0	0	0	0.001336	0	0.001336	0
ENST00000468741	ENSG00000114757	PEX5L	0	0	0	0	0	0.001323	0	0.001323	0
ENST00000592515	ENSG00000167671	UBXN6	0	0	0	0	0	0.001288	0	0.001288	0
ENST00000644543	ENSG00000019991	HGF	0	0	0	0	0	0.001271	0	0.001271	0
ENST00000425166	ENSG00000198814	GK	0	0	0	0	0	0.001266	0	0.001266	0
ENST00000588115	ENSG00000132016	C19orf57	0	0	0	0	0	0.00124	0	0.00124	0
ENST00000320057	ENSG00000144730	IL17RD	0	0	0	0	0.000296	0.001227	0	0.001227	0
ENST00000471418	ENSG00000181722	ZBTB20	0	0	0	0	0	0.001215	0	0.001215	0
ENST00000637698	ENSG00000104237	RP1	0	0	0	0	0	0.001201	0	0.001201	0
ENST00000515886	ENSG00000175920	DOK7	0	0	0	0	0	0.001183	0	0.001183	0
ENST00000644005	ENSG00000185811	IKZF1	0	0	0	0	0	0.001177	0	0.001177	0
ENST00000509258	ENSG00000063978	RNF4	0	0	0	0	0	0.001149	0	0.001149	0
ENST00000369303	ENSG00000135333	EPHA7	0	0	0	0	0	0.00112	0	0.00112	0
ENST00000433736	ENSG00000138448	ITGAV	0	0	0.000337	0	0	0.001098	0	0.001098	0
ENST00000552744	ENSG00000067715	SYT1	0	0	0	0	0	0.001092	0	0.001092	0
ENST00000371757	ENSG00000107147	KCNT1	0	0	0	0	0	0.001041	0	0.001041	0
ENST00000335012	ENSG00000187068	C3orf70	0	0	0	0	0	0.001036	0	0.001036	0
ENST00000539168	ENSG00000179776	CDH5	0	0	0	0	0	0.001035	0	0.001035	0
ENST00000523521	ENSG00000147471	PLPBP	0	0	0	0	0	0.001021	0	0.001021	0
ENST00000382080	ENSG00000185053	SGCZ	0	0	0	0	0	0.00101	0	0.00101	0
ENST00000586751	ENSG00000053747	LAMA3	0	0	0	0	0	0.001008	0	0.001008	0
ENST00000542309	ENSG00000155974	GRIP1	0	0	0	0	0	0.001002	0	0.001002	0
ENST00000355577	ENSG00000156042	CFAP70	0	0	0	0	0	0.000996	0	0.000996	0
ENST00000579583	ENSG00000133313	CNDP2	0	0	0	0	0	0.000989	0	0.000989	0
ENST00000395825	ENSG00000141040	ZNF287	0	0	0	0	0	0.000971	0	0.000971	0
ENST00000410014	ENSG00000188010	MORN2	0	0	0	0	0	0.000954	0	0.000954	0
ENST00000484350	ENSG00000114861	FOXP1	0	0	0	0	0	0.000917	0	0.000917	0
ENST00000409438	ENSG00000204843	DCTN1	0	0	0	0	0	0.000906	0	0.000906	0
ENST00000400122	ENSG00000073584	SMARCE1	0	0	0	0	0	0.000904	0	0.000904	0
ENST00000377073	ENSG00000147117	ZNF157	0	0	0	0	0	0.000896	0	0.000896	0
ENST00000510784	ENSG00000111913	RIPOR2	0	0	0	0	0	0.000879	0	0.000879	0
ENST00000414705	ENSG00000101096	NFATC2	0	0	0	0	0	0.000867	0	0.000867	0
ENST00000519895	ENSG00000101977	MCF2	0	0	0	0	0	0.000845	0	0.000845	0
ENST00000382713	ENSG00000206052	DOK6	0	0	0	0	0	0.000819	0	0.000819	0
ENST00000474850	ENSG00000118507	AKAP7	0	0	0	0	0	0.000812	0	0.000812	0
ENST00000431078	ENSG00000155052	CNTNAP5	0	0	0	0	0	0.000793	0	0.000793	0
ENST00000557629	ENSG00000155465	SLC7A7	0	0	0	0	0	0.000787	0	0.000787	0
ENST00000566290	ENSG00000197562	RAB40C	0	0	0	0	0	0.000764	0	0.000764	0
ENST00000368122	ENSG00000213088	ACKR1	0	0	0	0	0	0.000764	0	0.000764	0
ENST00000514101	ENSG00000120784	ZFP30	0	0	0	0	0	0.00076	0	0.00076	0
ENST00000642989	ENSG00000103723	AP3B2	0	0	0	0	0	0.00073	0	0.00073	0
ENST00000525955	ENSG00000186652	PRG2	0	0	0	0	0	0.000708	0	0.000708	0
ENST00000640220	ENSG00000003989	SLC7A2	0	0	0	0	0	0.000697	0	0.000697	0
ENST00000348719	ENSG00000100938	GMPR2	0	0	0	0	0	0.000683	0	0.000683	0
ENST00000447166	ENSG00000221843	C2orf16	0	0	0	0	0	0.000676	0	0.000676	0
ENST00000337777	ENSG00000120756	PLS1	0	0	0	0	0	0.000672	0	0.000672	0
ENST00000651132	ENSG00000197753	LHFPL5	0	0	0	0	0	0.000646	0	0.000646	0
ENST00000618057	ENSG00000198542	ITGBL1	0	0	0	0	0	0.000645	0	0.000645	0
ENST00000427674	ENSG00000184640	2021-09-09	0	0	0	0	0	0.000641	0.000214	0.000641	0
ENST00000627129	ENSG00000112742	TTK	0	0	0	0	0	0.000639	0.000227	0.000639	0
ENST00000394622	ENSG00000157214	STEAP2	0	0	0	0	0	0.000639	0	0.000639	0
ENST00000554877	ENSG00000205476	CCDC85C	0	0	0	0	0	0.000627	0	0.000627	0
ENST00000400913	ENSG00000171680	PLEKHG5	0	0	0	0	0	0.000626	0	0.000626	0
ENST00000441031	ENSG00000165188	RNF183	0	0	0	0	0	0.000583	0	0.000583	0
ENST00000248933	ENSG00000100095	SEZ6L	0	0	0	0	0	0.000582	0	0.000582	0
ENST00000646465	ENSG00000100150	DEPDC5	4e-06	0	0	1e-06	0	0.000568	0	0.000568	0
ENST00000636413	ENSG00000169554	ZEB2	0	0	0	0	0	0.000522	0	0.000522	0
ENST00000397325	ENSG00000182870	GALNT9	0	0	0	0	0	0.000472	0	0.000472	0
ENST00000590228	ENSG00000141404	GNAL	0	0	0	0	0	0.000451	0	0.000451	0
ENST00000374360	ENSG00000082458	DLG3	0	0	0	0	8e-06	0.000422	4.7e-05	0.000422	0
ENST00000380746	ENSG00000119772	DNMT3A	0	0	0	0	0	0.000413	0	0.000413	0
ENST00000641943	ENSG00000109339	MAPK10	0	0	0	0	0	0.000348	0	0.000348	0
ENST00000392614	ENSG00000172794	RAB37	0	0	0	0	0	0.000327	0	0.000327	0
ENST00000612452	ENSG00000169083	AR	0	0	0	0	0	0.000319	0	0.000319	0.00011
ENST00000371766	ENSG00000122133	PAEP	0	8e-05	0	0	0	0.000318	0	0.000318	0
ENST00000285046	ENSG00000154783	FGD5	0	0	0	0	0	0.000309	0	0.000309	0
ENST00000625585	ENSG00000081189	MEF2C	0	0	0	0	0	0.000289	0	0.000289	0
ENST00000519950	ENSG00000133943	DGLUCY	0	0	0	0	0	0.000282	0	0.000282	0
ENST00000205890	ENSG00000091536	MYO15A	0	0	0	0	0	0.00027	0	0.00027	6.8e-05
ENST00000373558	ENSG00000197122	SRC	0	0	0	0	0	0.000257	0	0.000257	0
ENST00000560579	ENSG00000170776	AKAP13	0	0	0	0	0	0.000255	0	0.000255	0
ENST00000413154	ENSG00000166278	C2	0	0	0	0	0	0.000222	0	0.000222	0
ENST00000440890	ENSG00000138696	BMPR1B	0	0	0	0	0	0.00017	0	0.00017	0
ENST00000404092	ENSG00000285762	AC253536.7	0	0	0	0	0	0.000162	0	0.000162	0
ENST00000589699	ENSG00000166974	MAPRE2	0	0	0	0	0	0.000143	0	0.000143	0
ENST00000379863	ENSG00000115216	NRBP1	0	0	1.4e-05	0	4.2e-05	0.000136	3e-06	0.000136	0
ENST00000638081	ENSG00000175344	CHRNA7	0	0	0	0	0	0.000133	0	0.000133	0
ENST00000358212	ENSG00000197535	MYO5A	0	0	0	0	0	0.000131	0	0.000131	3e-06
ENST00000514028	ENSG00000081189	MEF2C	0	0	0	0	0	8.7e-05	0	8.7e-05	0
ENST00000645250	ENSG00000197283	SYNGAP1	0	0	0	0	0	7.6e-05	0	7.6e-05	0
ENST00000560310	ENSG00000134152	KATNBL1	0	0	0	0	0	6.8e-05	0	6.8e-05	0
ENST00000449906	ENSG00000144362	PHOSPHO2	0	0	0	0	0	6.8e-05	0	6.8e-05	0
ENST00000596188	ENSG00000179542	SLITRK4	0	0	0	0	0	6.1e-05	0	6.1e-05	6e-06
ENST00000372006	ENSG00000117461	PIK3R3	0	0	0	0	0	5.9e-05	0	5.9e-05	0
ENST00000611080	ENSG00000147677	EIF3H	0	0	0	0	0	5.9e-05	0	5.9e-05	0
ENST00000412671	ENSG00000133943	DGLUCY	0	0	0	0	0	5.8e-05	0	5.8e-05	0
ENST00000492457	ENSG00000243709	LEFTY1	0	0	0	0	0	4.8e-05	0	4.8e-05	0
ENST00000621678	ENSG00000166313	APBB1	0	0	0	0	0	4.2e-05	0	4.2e-05	0
ENST00000377486	ENSG00000068831	RASGRP2	0	0	0	0	0	3e-05	0	3e-05	0
ENST00000628912	ENSG00000178950	GAK	0	0	7e-06	0	0	2.1e-05	0	2.1e-05	0
ENST00000565324	ENSG00000157106	SMG1	0	0	0	0	0	1.3e-05	0	1.3e-05	0
ENST00000475727	ENSG00000143355	LHX9	0	0	0	0	0	1e-05	0	1e-05	0
ENST00000581201	ENSG00000270629	NBPF14	0	0	0	0	0	6e-06	0	6e-06	0
ENST00000646814	ENSG00000101266	CSNK2A1	0	0	0	0	0	2e-06	0	2e-06	0
ENST00000368685	ENSG00000143553	SNAPIN	0	0	0	0	0	1e-06	0	1e-06	0
ENST00000528053	ENSG00000186318	BACE1	0	0	0	0	0	1e-06	0	1e-06	0
ENST00000549570	ENSG00000091039	OSBPL8	0	0	0	0	0	1e-06	0	1e-06	0
ENST00000400050	ENSG00000168502	MTCL1	0	0	0	0	0	1e-06	0	1e-06	0
ENST00000615563	ENSG00000196586	MYO6	0	0	0	0	0	1e-06	0	1e-06	0
ENST00000648098	ENSG00000127955	GNAI1	0	0	0	0	0	1e-06	0	1e-06	0

## Sheet: mRNA_UV_cluster 5
transcript_id	gene_id	gene_name	C_0	UV_3	UV_6	UV_9	UV_12	UV_24	UV_48	UV_24	UV_96
ENST00000541182	ENSG00000143761	ARF1	0.046041	2.78953	2.80262	0	1.23453	5.70281	101.361	5.70281	0
ENST00000643579	ENSG00000167460	TPM4	2.54565	5.59786	2.41006	0.321579	6.94914	0.013381	55.52	0.013381	5.35354
ENST00000520637	ENSG00000104738	MCM4	0.232856	0.147568	0.137529	0.086583	0.194955	0.20556	32.6622	0.20556	0.067758
ENST00000000412	ENSG00000003056	M6PR	0.000301	0.561823	0.028716	0.507321	0.01778	0.25859	28.7487	0.25859	5.01823
ENST00000618139	ENSG00000104529	EEF1D	0	0	1.34281	0	0.406151	0.085516	25.8532	0.085516	3.9889
ENST00000591382	ENSG00000108883	EFTUD2	0	2.97888	1.61127	0	2.74161	0	23.9099	0	0
ENST00000599898	ENSG00000105640	RPL18A	0	7.09746	0	0	0	0	20.4007	0	0
ENST00000426836	ENSG00000149636	DSN1	3.42991	0.008821	2.97436	0.011	0.014761	2.13941	20.3247	2.13941	0.005085
ENST00000444183	ENSG00000135926	TMBIM1	4.37635	0.807292	1.48984	0.874537	0.738154	0.184096	18.3036	0.184096	0.204322
ENST00000426713	ENSG00000175701	MTLN	0	0	0	0	0	0	16.6984	0	0
ENST00000428726	ENSG00000026508	CD44	0.763016	0.477475	0.134152	0.475767	0.562111	0.725169	15.7432	0.725169	0.734759
ENST00000567815	ENSG00000167526	RPL13	0	0	0	0	0	0	12.9369	0	0
ENST00000369817	ENSG00000147403	RPL10	0.003645	0	0.699279	0.027694	0	0	12.878	0	2.10891
ENST00000560829	ENSG00000028528	SNX1	0.076685	0.067941	0.265302	0.254773	0.094532	0.188318	11.4683	0.188318	0.210578
ENST00000616939	ENSG00000198522	GPN1	8.6e-05	0.024489	0.030925	0.000286	0.271655	0.000706	10.1705	0.000706	0.000416
ENST00000538315	ENSG00000061794	MRPS35	0.675525	0.655869	0.220683	0.301818	0.643604	0.445928	8.09553	0.445928	0.362166
ENST00000409764	ENSG00000172115	CYCS	0.063126	0.510873	0.432504	1.10584	0.166035	0.112376	7.75455	0.112376	0.043457
ENST00000503040	ENSG00000163682	RPL9	0	0	0	0	0	0	7.274	0	0
ENST00000517371	ENSG00000185728	YTHDF3	0.278672	2.07586	0.131994	0.192956	0	0.356638	6.60915	0.356638	0
ENST00000376692	ENSG00000116670	MAD2L2	0.032284	0.044511	0.037098	0.024771	0.023483	0.021589	6.56496	0.021589	0.050932
ENST00000282587	ENSG00000152683	SLC30A6	0.394847	0.855003	0.325043	0.178137	0.490918	0.063098	5.82519	0.063098	0.130881
ENST00000429220	ENSG00000109917	ZPR1	0.06943	0.003601	0.026332	0	0.217281	0.072856	5.48442	0.072856	0
ENST00000605140	ENSG00000271503	CCL5	0	0	0	0	0	0.016757	5.22306	0.016757	0
ENST00000428192	ENSG00000167770	OTUB1	0	0	0	0	0	0	5.19482	0	0
ENST00000618160	ENSG00000111358	GTF2H3	0.093079	0.135604	0.134029	0.107744	0.125601	0.63695	4.99007	0.63695	0.106375
ENST00000426335	ENSG00000149182	ARFGAP2	0.020996	0.254287	0.068878	0.161389	0.313338	0.061352	4.66624	0.061352	0.027831
ENST00000509777	ENSG00000109452	INPP4B	0.118827	0.158519	0.021229	0.006624	0.006322	0.183136	4.53653	0.183136	0.173935
ENST00000453744	ENSG00000109332	UBE2D3	0.000225	0.253133	0.000324	0.000323	0.000173	0.07921	4.53087	0.07921	0.000197
ENST00000514555	ENSG00000158402	CDC25C	0	0	0	1.92616	0	0.106586	4.51634	0.106586	0
ENST00000649011	ENSG00000168216	LMBRD1	0	0.019331	0	0	0	0	4.50666	0	0.004161
ENST00000359544	ENSG00000165006	UBAP1	0.000764	0	0	0	0.00057	0	4.44838	0	0
ENST00000651322	ENSG00000100209	HSCB	0.057188	0.058642	0.116985	0.013777	0.034159	0.789663	4.19492	0.789663	0.074738
ENST00000610967	ENSG00000178252	WDR6	0	0.010847	0.000287	0	0	0.014297	4.18606	0.014297	0.243858
ENST00000336916	ENSG00000115414	FN1	0.014363	0.013001	0.010623	0.008593	0.011849	0.005636	4.05168	0.005636	0.002848
ENST00000264274	ENSG00000064012	CASP8	2.5e-05	0	0.03874	0.039029	0.063147	5.9e-05	3.98213	5.9e-05	2.4e-05
ENST00000357586	ENSG00000100280	AP1B1	1.19499	0	0.145354	0	0.456761	0.001336	3.63259	0.001336	5.8e-05
ENST00000638410	ENSG00000082212	ME2	0	0	0.000498	0	0	0.000184	3.50291	0.000184	0
ENST00000373236	ENSG00000079332	SAR1A	0.095344	0.065449	0.146005	0.067644	0.107395	0.456666	3.49966	0.456666	0.18385
ENST00000421743	ENSG00000117152	RGS4	0	0	0	0	0	0	3.49354	0	0
ENST00000292433	ENSG00000160888	IER2	0.000558	0.000445	0.00067	0.000214	0.0004	0.000383	3.21839	0.000383	0.077241
ENST00000586277	ENSG00000131469	RPL27	0	0	0	0	0	0	3.08803	0	0
ENST00000551828	ENSG00000120805	ARL1	0	0	0.088068	0.001097	0	0.950258	2.9969	0.950258	0
ENST00000428900	ENSG00000082126	MPP4	0.005123	0.033198	0.005031	0	0	0	2.84077	0	0.00916
ENST00000361654	ENSG00000130779	CLIP1	0	0.00013	0	0	0.52785	0	2.81563	0	0.000155
ENST00000394223	ENSG00000109390	NDUFC1	0	0	0	0	0	0	2.79221	0	0.748266
ENST00000558170	ENSG00000169554	ZEB2	0.02479	0.04461	0.758171	0.02108	0.121051	0.046148	2.69806	0.046148	0.033091
ENST00000342016	ENSG00000138433	CIR1	0	0	0	1.06796	0	0	2.66239	0	0
ENST00000442241	ENSG00000073536	NLE1	0.078985	0.204039	0.041294	0.160817	0.206037	0.0946	2.63999	0.0946	0.100283
ENST00000615329	ENSG00000136643	RPS6KC1	0	0	0	0	0	0	2.60808	0	0
ENST00000436410	ENSG00000183486	MX2	0	0	0	0	0	0.474373	2.54164	0.474373	0.052879
ENST00000622514	ENSG00000196730	DAPK1	0.00052	0.000221	0	0.000678	0.803055	0.000463	2.53821	0.000463	0.00051
ENST00000438882	ENSG00000115762	PLEKHB2	0	0	0.226933	0	0	0	2.53307	0	0
ENST00000538026	ENSG00000113140	SPARC	0	0	0	0	0	0	2.49204	0	0
ENST00000411827	ENSG00000070831	CDC42	0.019134	0.056562	0.044431	0.037713	0.010008	0.031853	2.48423	0.031853	0.05905
ENST00000529444	ENSG00000134575	ACP2	0	0.170797	0	0	0	0	2.35144	0	0.169819
ENST00000561372	ENSG00000128463	EMC4	0.026964	0.082546	0.040123	0.032949	0.038726	0.07246	2.31201	0.07246	0.036617
ENST00000379300	ENSG00000145979	TBC1D7	0.069594	0.15601	0.068016	0.180349	0.025855	0.065895	1.98564	0.065895	0.030504
ENST00000485435	ENSG00000148248	SURF4	0	0	0	0	0	0.056332	1.93004	0.056332	0
ENST00000452865	ENSG00000128654	MTX2	0	0	0	0	0	0.617632	1.8326	0.617632	0
ENST00000504238	ENSG00000173210	ABLIM3	0	0	0	0	0	0	1.74893	0	0
ENST00000463369	ENSG00000144736	SHQ1	0.011726	0.006064	0.006803	0.005105	0.006935	0.414644	1.71555	0.414644	0.004609
ENST00000360214	ENSG00000157557	ETS2	0.037177	0	0	0	0.239973	0.093607	1.67037	0.093607	0.005334
ENST00000317350	ENSG00000170525	PFKFB3	0.005448	0	0	0	0	0	1.65321	0	0.010349
ENST00000441265	ENSG00000076242	MLH1	0.326438	0	0	0.000916	0.00223	0.023265	1.63262	0.023265	0.083701
ENST00000627920	ENSG00000149182	ARFGAP2	0.017153	0.016139	0	0.006338	0.129691	0.002517	1.49303	0.002517	0.001415
ENST00000357867	ENSG00000115414	FN1	0.05224	0.006739	0.012616	0.008007	0.013405	0.015423	1.46629	0.015423	0.018748
ENST00000526492	ENSG00000148926	ADM	0	0	0	0	0	0	1.44748	0	0.202649
ENST00000394333	ENSG00000125691	RPL23	0	0	0	0	0	0	1.41307	0	0
ENST00000405204	ENSG00000130349	C6orf203	0	0	0	0	0	0.308961	1.40492	0.308961	0
ENST00000358335	ENSG00000105221	AKT2	0.07239	0.037378	0.042149	0.033652	0.051119	0.112609	1.39862	0.112609	0.087317
ENST00000357720	ENSG00000104907	TRMT1	0.02775	0.027185	0.036353	0.041724	0.019912	0.010776	1.36332	0.010776	0.004292
ENST00000427708	ENSG00000115392	FANCL	0.035403	0.113811	0.029387	0.031112	0.079555	0.075644	1.30042	0.075644	0.094933
ENST00000536375	ENSG00000111358	GTF2H3	0.158119	0.125322	0	0	0.210921	0	1.27665	0	0.104309
ENST00000428953	ENSG00000165813	CCDC186	0	0	0	0	0	0	1.27133	0	0
ENST00000394496	ENSG00000113578	FGF1	0.017705	0.268908	0.013363	0.009012	0.007175	0.007519	1.2536	0.007519	0.004332
ENST00000532634	ENSG00000137216	TMEM63B	0.000446	0.284595	0.089455	0.005199	0.006444	0.010798	1.21632	0.010798	0.037791
ENST00000447810	ENSG00000105618	PRPF31	0.001968	0.066758	0.057957	0.026335	0.020908	0.05754	1.16878	0.05754	0.051835
ENST00000420015	ENSG00000140694	PARN	0	0	0	0.088055	0	0.163279	1.16566	0.163279	0.054049
ENST00000294724	ENSG00000162688	AGL	0.085927	0.031925	0.077418	0.006367	0.034888	0.091301	1.14751	0.091301	0.142708
ENST00000524009	ENSG00000104368	PLAT	0	0	0	0	0	0	1.11525	0	0
ENST00000572257	ENSG00000181523	SGSH	0.104309	0	0	0	0.084416	0.078543	1.07228	0.078543	0
ENST00000652342	ENSG00000162775	RBM15	0.000129	0.000506	0.001042	0.002457	0.000997	0.000195	1.04435	0.000195	0.001508
ENST00000624697	ENSG00000187608	ISG15	0.078447	0	0	0	0	0.003212	0.986884	0.003212	0.05405
ENST00000509236	ENSG00000087206	UIMC1	0	0	0	0.210937	0	0	0.984992	0	0
ENST00000648743	ENSG00000168216	LMBRD1	0	0	0	0.315379	0	0	0.958095	0	0
ENST00000520188	ENSG00000047249	ATP6V1H	0	0.004744	0	0.003627	0.001188	0.00311	0.931268	0.00311	0
ENST00000357811	ENSG00000197467	COL13A1	0	0	0	0	0	0	0.925459	0	0
ENST00000374593	ENSG00000119326	CTNNAL1	0.025097	0.003311	0.034522	0.02374	0	0.216552	0.895351	0.216552	0.023366
ENST00000611941	ENSG00000101040	ZMYND8	0	0.06402	0	0	0	0.120362	0.879371	0.120362	0.134999
ENST00000439637	ENSG00000137845	ADAM10	0.01217	0	0.022807	0	0.024142	0	0.868133	0	0
ENST00000414861	ENSG00000080345	RIF1	0	0	0	0	0.401123	0.039707	0.866981	0.039707	0
ENST00000354547	ENSG00000197467	COL13A1	0.002141	0	0	0	0.033121	0.136332	0.864284	0.136332	0
ENST00000506237	ENSG00000113387	SUB1	0	0	0	0	0	0	0.863405	0	0.106734
ENST00000528780	ENSG00000185885	IFITM1	0.020669	0.010391	0	0.008762	0	0	0.842716	0	0
ENST00000555970	ENSG00000165525	NEMF	0.044089	0	0	0.063119	0	0.10825	0.84052	0.10825	0.058556
ENST00000636879	ENSG00000164904	ALDH7A1	0	0	0	0	0	0	0.835337	0	0
ENST00000589346	ENSG00000177150	FAM210A	0.025853	0.010567	0.011683	0.010524	0.012596	0.011014	0.82533	0.011014	0.00957
ENST00000543504	ENSG00000120647	CCDC77	0.000372	0.000432	0.055997	0.000229	0.004024	0	0.8226	0	0.000572
ENST00000408918	ENSG00000221978	CCNL2	0.000295	0.010491	0.000151	0.00031	0.069185	0.002969	0.806184	0.002969	0.000811
ENST00000612905	ENSG00000234616	JRK	0.000771	0.177414	0.000167	0.000902	0.000596	0.000727	0.795264	0.000727	0.001147
ENST00000549206	ENSG00000120833	SOCS2	0	0.081617	0	0.005888	0	0.068356	0.731776	0.068356	0
ENST00000265601	ENSG00000112290	WASF1	0.014085	0.044425	0.070478	0.036033	0	0.029384	0.719331	0.029384	0
ENST00000487990	ENSG00000159200	RCAN1	0	0	0	0.002613	0	0.00485	0.71822	0.00485	0.005718
ENST00000628866	ENSG00000166986	MARS	0	0	0	0	0	0	0.703649	0	0
ENST00000483994	ENSG00000116459	ATP5PB	0	0	0	0	0	0	0.69458	0	0.054012
ENST00000423081	ENSG00000143379	SETDB1	0.034883	0.012434	0	0	0	0.032287	0.679114	0.032287	0
ENST00000462637	ENSG00000114054	PCCB	0.164455	0	0	0	0	0	0.678048	0	0
ENST00000310336	ENSG00000172915	NBEA	0.017501	0.026253	0.023027	0	0.007973	0.007386	0.647987	0.007386	0.008294
ENST00000578804	ENSG00000108654	DDX5	0	0	0.130864	0.001642	0.034577	0.040333	0.64298	0.040333	0.026133
ENST00000515463	ENSG00000153037	SRP19	0	0	0	0	0	0	0.634289	0	0
ENST00000541778	ENSG00000111641	NOP2	0.142735	0.000713	0.000266	0.097867	0.003482	0.02678	0.621331	0.02678	0.000246
ENST00000309439	ENSG00000164162	ANAPC10	0.000155	0.005287	7.7e-05	3.7e-05	0.0032	0.000194	0.617175	0.000194	0.01224
ENST00000625349	ENSG00000108848	LUC7L3	0.030086	0.001099	0.000455	0.000882	0.018862	0.027818	0.615211	0.027818	0.001997
ENST00000271002	ENSG00000142856	ITGB3BP	0.00104	0	0	0.00088	0.121177	0	0.606385	0	0
ENST00000396050	ENSG00000131080	EDA2R	0.005602	0	0	0	0.000597	0.006163	0.599361	0.006163	0.01072
ENST00000523892	ENSG00000104419	NDRG1	0.00367	0	0.011821	0	0.025594	0.007554	0.566599	0.007554	0.016916
ENST00000374530	ENSG00000157654	PALM2-AKAP2	0	0	0.009553	0.00068	0.00059	0	0.5613	0	0.02054
ENST00000650790	ENSG00000183735	TBK1	0.059234	0.012106	0.075909	0.020855	0.007713	0.014071	0.559609	0.014071	0.021796
ENST00000548915	ENSG00000123395	ATG101	0	0	0	0	0	0	0.55828	0	0
ENST00000622241	ENSG00000275342	PRAG1	0.003241	0.00025	0.000322	0.000458	0.001337	0.00084	0.548651	0.00084	0.00016
ENST00000452020	ENSG00000129810	SGO1	0.010479	0.052385	0.010751	0.051137	0.036564	0.027752	0.51251	0.027752	0.026172
ENST00000560369	ENSG00000137821	LRRC49	0.043539	0.044359	0.041903	0.007937	0.003123	0.005507	0.51101	0.005507	0.002181
ENST00000525849	ENSG00000112319	EYA4	0.00607	0.001953	0.00594	0	0	0.002586	0.509881	0.002586	0.003086
ENST00000578503	ENSG00000082397	EPB41L3	0.006917	0.009263	0.009532	0.009399	0.030245	0.047188	0.509624	0.047188	0.019573
ENST00000469028	ENSG00000100138	SNU13	0.001784	0.009911	0.087164	0.063792	0.008335	0.013616	0.503756	0.013616	0.002009
ENST00000448849	ENSG00000134897	BIVM	0	0	0	0	0	0.005757	0.503663	0.005757	0
ENST00000263991	ENSG00000115504	EHBP1	0.002891	0	0.001888	0.000979	0.007577	0.001839	0.503	0.001839	0.00175
ENST00000512816	ENSG00000171604	CXXC5	0	0.013909	0.002594	0.007269	0	0.010626	0.499821	0.010626	0.01637
ENST00000648068	ENSG00000006530	AGK	0	0	0.125804	0	0	0	0.494729	0	0
ENST00000434753	ENSG00000101966	XIAP	0	0	0	0	0	0	0.48797	0	0
ENST00000651122	ENSG00000271503	CCL5	0	0	0	0	0	0.000944	0.471817	0.000944	0.071003
ENST00000527271	ENSG00000150433	TMEM218	0	0.014276	0	0.030308	0	0.013214	0.47013	0.013214	0
ENST00000324219	ENSG00000071054	MAP4K4	0.001971	0.00141	0.010124	0.010311	0.000253	0.027901	0.464727	0.027901	0.005759
ENST00000502673	ENSG00000127022	CANX	0	0	0	0	0	0	0.463284	0	0
ENST00000506693	ENSG00000113761	ZNF346	0	0	0	0.038163	0	0	0.456671	0	0
ENST00000557317	ENSG00000100532	CGRRF1	0.107059	5e-06	1e-05	0	2e-06	1.4e-05	0.446907	1.4e-05	4e-06
ENST00000543877	ENSG00000105676	ARMC6	0	0	0	0.001425	0	0	0.446112	0	0
ENST00000517679	ENSG00000171530	TBCA	0.006795	0	0	0.012346	0	0.00059	0.442649	0.00059	0.013417
ENST00000546047	ENSG00000181045	SLC26A11	0	0	0	0	0	0	0.435792	0	0
ENST00000431857	ENSG00000136877	FPGS	0.005562	0.071617	0.007013	0.024621	0.028442	0.008584	0.427133	0.008584	0.004584
ENST00000646974	ENSG00000167460	TPM4	0	0.000796	0	0	4.8e-05	0	0.418963	0	0
ENST00000278935	ENSG00000110274	CEP164	0	0	0	0	0	0	0.410674	0	0.124532
ENST00000556744	ENSG00000075413	MARK3	0	0	0.012859	0	0	0	0.409339	0	0
ENST00000367027	ENSG00000117594	HSD11B1	0	0	0	0	0	0	0.408079	0	0.080366
ENST00000567119	ENSG00000205923	CEMP1	0.011899	0.015269	0.019765	0.000188	0.002142	0.000234	0.394215	0.000234	0.004001
ENST00000537531	ENSG00000142910	TINAGL1	0	0	0	0.146235	0	0	0.391755	0	0
ENST00000613327	ENSG00000138347	MYPN	0.006323	0.022348	0.000332	0.04657	0.001121	0.002174	0.3844	0.002174	0.004124
ENST00000379980	ENSG00000133026	MYH10	0	0	0	0	0	0	0.383898	0	0
ENST00000441189	ENSG00000215301	DDX3X	0	0	0	0	0	0	0.374301	0	0
ENST00000398594	ENSG00000254122	PCDHGB7	0	0	0	0	0	0	0.360043	0	0
ENST00000394949	ENSG00000169375	SIN3A	0	0.018288	0.004236	0.003119	0.002396	0.016059	0.356789	0.016059	0.004206
ENST00000449030	ENSG00000042493	CAPG	0	0	0	0	0	0	0.355427	0	0
ENST00000491373	ENSG00000187624	C17orf97	0	0	0.118842	0	0	0	0.348999	0	0
ENST00000433205	ENSG00000135596	MICAL1	0	0	0	0	0	0	0.33535	0	0
ENST00000409437	ENSG00000115966	ATF2	0.001206	0	0.000525	0	0.000974	0.000947	0.323831	0.000947	0.000253
ENST00000398927	ENSG00000157551	KCNJ15	0	0	0.068827	0	0.053982	0	0.322404	0	0
ENST00000474717	ENSG00000101109	STK4	0.003755	0	0	0	0.002428	0.002986	0.320693	0.002986	0
ENST00000522476	ENSG00000104419	NDRG1	0	0	0	0	0.149372	0	0.312717	0	0
ENST00000388922	ENSG00000139567	ACVRL1	0	0.007596	0	0	0	0	0.307347	0	0
ENST00000409743	ENSG00000115661	STK16	0	0	0	0	0	0	0.304934	0	0
ENST00000599537	ENSG00000142546	NOSIP	0	0.016264	0	0	0	0.002284	0.304319	0.002284	0
ENST00000610300	ENSG00000269713	NBPF9	0.107095	0	0	0	0	0	0.301529	0	0
ENST00000498083	ENSG00000157870	PRXL2B	0	0	0	0	0.038583	0	0.297721	0	0.066254
ENST00000420814	ENSG00000177479	ARIH2	0.041773	0	0	0	0	0	0.29703	0	0
ENST00000452476	ENSG00000145220	LYAR	0	0.001464	0.002898	0	0.001087	0	0.296845	0	0
ENST00000628377	ENSG00000131373	HACL1	0	0.000893	0	0.017758	0	0.02596	0.296092	0.02596	0.025095
ENST00000608657	ENSG00000082781	ITGB5	0	0.005503	0	0	0	0	0.293583	0	0
ENST00000597298	ENSG00000125734	GPR108	0	0	0	0	0	0	0.287678	0	0.06487
ENST00000503229	ENSG00000113552	GNPDA1	0	0	0	0	0	0	0.286982	0	0
ENST00000243562	ENSG00000090006	LTBP4	0	0	0	0	0	0	0.278325	0	0
ENST00000462462	ENSG00000175279	CENPS	0	0	0	0	0	0	0.272914	0	0
ENST00000334664	ENSG00000244624	KRTAP20-1	0	0	0	0	0	0	0.266509	0	0.036592
ENST00000322176	ENSG00000123992	DNPEP	0	0	0	0	0	0	0.26248	0	0
ENST00000370649	ENSG00000249967	AL355315.1	0	0	0	0	0	0	0.25637	0	0
ENST00000471898	ENSG00000065150	IPO5	0	0	0	0	0	0	0.253415	0	0
ENST00000448940	ENSG00000143776	CDC42BPA	0.02573	0.007883	0.00632	0.000921	0.008472	0.012444	0.252872	0.012444	0.011346
ENST00000396886	ENSG00000082126	MPP4	0	0	0.00071	0	0	0	0.25189	0	0.001669
ENST00000530622	ENSG00000139597	N4BP2L1	0	0	0	0	0	0	0.247608	0	0
ENST00000619748	ENSG00000273136	NBPF26	0.00582	0.003358	0.002036	0	0.001011	0.001755	0.246158	0.001755	0
ENST00000368013	ENSG00000186517	ARHGAP30	0	0	0	0	0	0.008318	0.24543	0.008318	0.014853
ENST00000466533	ENSG00000130962	PRRG1	0	0	0	0	0	0.010831	0.237598	0.010831	0.012578
ENST00000445927	ENSG00000239605	STPG4	0	0	0	0	0	0	0.237416	0	0
ENST00000647413	ENSG00000168036	CTNNB1	0	0	0	0	0	0	0.236402	0	0
ENST00000618655	ENSG00000136213	CHST12	0.000108	0.000151	0.055335	5e-06	6e-05	3.7e-05	0.235218	3.7e-05	0.000118
ENST00000400445	ENSG00000172915	NBEA	0.022938	0.016396	0.00716	0.003312	0.004695	0.004952	0.233896	0.004952	0.006558
ENST00000553327	ENSG00000197249	SERPINA1	0	0	0	0	0	0	0.23148	0	0
ENST00000403097	ENSG00000106070	GRB10	0.000349	0.00079	0	0.00233	0	0	0.230833	0	0
ENST00000553739	ENSG00000088808	PPP1R13B	0	0	0	0	0.020246	0.018207	0.230035	0.018207	0
ENST00000441687	ENSG00000123485	HJURP	0.024232	0	0	0.015619	0	0	0.229733	0	0.038127
ENST00000345530	ENSG00000118965	WDR35	0.003804	0	0	0	0.005661	0	0.229042	0	0
ENST00000524906	ENSG00000204839	MROH6	0	0	0	0	0	0.033888	0.227971	0.033888	0
ENST00000432791	ENSG00000120071	KANSL1	0.001666	0.107393	0.00052	0.000526	0.000415	0.000498	0.227477	0.000498	4.8e-05
ENST00000340726	ENSG00000104313	EYA1	0.005453	0.01426	0	0.001714	0.000546	0.018284	0.227342	0.018284	0.039731
ENST00000354411	ENSG00000091592	NLRP1	0	0	0	0	0	0	0.226926	0	0
ENST00000531306	ENSG00000150768	DLAT	0	0	0	0	0	0	0.224603	0	0
ENST00000525659	ENSG00000184371	CSF1	0	0.004195	0	0	0.052101	0.005006	0.221444	0.005006	0.003533
ENST00000418137	ENSG00000130762	ARHGEF16	0.056091	0	0	5.7e-05	0.001139	0	0.218134	0	0.000179
ENST00000562153	ENSG00000140830	TXNL4B	0	0	0	0	0	0.063772	0.218083	0.063772	0
ENST00000332647	ENSG00000179083	FAM133A	0	0	0	0.086017	0	0	0.217393	0	0
ENST00000639623	ENSG00000079819	EPB41L2	0	0	0	0	0	0	0.217288	0	0
ENST00000420658	ENSG00000196526	AFAP1	0.003038	0	0.000617	0.000984	0.003864	0.009508	0.215982	0.009508	0.003404
ENST00000584513	ENSG00000141562	NARF	0	0	0	0	0.056013	0	0.215417	0	0
ENST00000373362	ENSG00000188910	GJB3	0.009221	0	0.001251	0	0	0	0.21442	0	0.002005
ENST00000557833	ENSG00000105419	MEIS3	0.030316	5.1e-05	0.00875	1.7e-05	2.2e-05	2.7e-05	0.21314	2.7e-05	2.4e-05
ENST00000520462	ENSG00000171045	TSNARE1	0.010991	0.009642	0.013968	0	0.012709	0	0.203888	0	0.017853
ENST00000382891	ENSG00000109685	NSD2	0.093398	0	0	0	0	0.000315	0.202816	0.000315	0
ENST00000550883	ENSG00000089127	OAS1	0	0	0	0	0	0	0.201323	0	0
ENST00000453658	ENSG00000119139	TJP2	0	0	0	0.000911	0	0	0.200343	0	0
ENST00000494628	ENSG00000109689	STIM2	0	0	0	0	0	0	0.198709	0	0
ENST00000549076	ENSG00000101199	ARFGAP1	0	0	0	0	0	0	0.197835	0	0
ENST00000528372	ENSG00000147789	ZNF7	0.000199	0.069448	0.000328	0.000245	0.000174	0.000175	0.196659	0.000175	7.8e-05
ENST00000602849	ENSG00000162775	RBM15	0.000134	0.000557	0.000917	0.000412	0.000906	0.000202	0.196324	0.000202	0.000311
ENST00000494358	ENSG00000114126	TFDP2	0.046909	0	0	0.04623	0	0	0.190996	0	0
ENST00000613094	ENSG00000164093	PITX2	0	0	0	0.043387	0	0	0.187349	0	0
ENST00000355704	ENSG00000054611	TBC1D22A	0	0	0	0	0	0	0.185757	0	0
ENST00000473956	ENSG00000128510	CPA4	0	0	2e-06	0	0	0.001066	0.18385	0.001066	0
ENST00000444000	ENSG00000135926	TMBIM1	0	0	0	0	0	0	0.183684	0	0
ENST00000456069	ENSG00000075240	GRAMD4	0.011679	0	0	0	0.005938	0.005688	0.181461	0.005688	0.019158
ENST00000476573	ENSG00000163389	POGLUT1	0	0	0	0	0	0.040356	0.180341	0.040356	0
ENST00000638588	ENSG00000184156	KCNQ3	0.007082	0	0	0	0	0.003557	0.178557	0.003557	0
ENST00000326324	ENSG00000077782	FGFR1	0	0	0	0	0.001198	0	0.178484	0	0
ENST00000627515	ENSG00000060971	ACAA1	0	0	0	0	0.002483	0	0.17569	0	0
ENST00000397861	ENSG00000214226	C17orf67	0	0	0	0	0	0	0.175613	0	0
ENST00000409541	ENSG00000178826	TMEM139	0	0	0	0	0	0	0.174012	0	0
ENST00000441738	ENSG00000102265	TIMP1	0	0	0	0.012571	0	0.012721	0.173683	0.012721	0.020945
ENST00000314728	ENSG00000072134	EPN2	0.000178	0.002872	0.000784	0	0	0	0.171409	0	0.001612
ENST00000592514	ENSG00000105364	MRPL4	0	0	0.023847	0.007016	0	0.013035	0.17059	0.013035	0.009718
ENST00000483410	ENSG00000124508	BTN2A2	0	0.049234	0	0	0	0	0.170575	0	0
ENST00000534544	ENSG00000133794	ARNTL	0	0	0	0	0	0	0.169502	0	0
ENST00000596195	ENSG00000011243	AKAP8L	0	0	0	0	0.08523	0	0.169135	0	0
ENST00000543801	ENSG00000183793	NPIPA5	0.000711	0	0	0.000375	0	0.00106	0.168779	0.00106	0.000317
ENST00000409170	ENSG00000257529	RPL36A-HNRNPH2	0	0	0	0	0	0	0.168718	0	0
ENST00000514528	ENSG00000015479	MATR3	0	0	0.003368	0	0	0	0.168099	0	0
ENST00000569550	ENSG00000140526	ABHD2	0.005363	0	0	0.020096	0	0	0.167693	0	0
ENST00000644621	ENSG00000111913	RIPOR2	0.008572	0	0	0	0	0	0.165009	0	0
ENST00000560158	ENSG00000137821	LRRC49	0	0	0	0	0.072806	0	0.164041	0	8e-05
ENST00000419312	ENSG00000164828	SUN1	0	0.047828	0	0	0	0	0.163631	0	0
ENST00000613986	ENSG00000196684	HSH2D	0	0	0	0	0	0	0.162119	0	0
ENST00000603544	ENSG00000100890	KIAA0391	0.025623	0	0	0	0.025893	1e-06	0.161067	1e-06	0
ENST00000417955	ENSG00000161048	NAPEPLD	0	0	0	0	0	0	0.160944	0	0
ENST00000229913	ENSG00000164627	KIF6	0	0	0	0	0	0	0.160889	0	0.00676
ENST00000263864	ENSG00000118640	VAMP8	0	0	0.002903	0.021439	0	0	0.160589	0	0
ENST00000482525	ENSG00000075785	RAB7A	0	0	0	0	0	0	0.160445	0	0
ENST00000550777	ENSG00000111142	METAP2	0	0	0	0	0	0	0.15871	0	0
ENST00000523601	ENSG00000104375	STK3	0	0	0.006063	0	0.007623	0	0.156814	0	0.027084
ENST00000527131	ENSG00000149547	EI24	0.006511	0	0	0.05496	0	0	0.156776	0	0
ENST00000577432	ENSG00000141562	NARF	0.048012	0	0	0.000632	0.002965	0.001109	0.155917	0.001109	0.017058
ENST00000615191	ENSG00000117713	ARID1A	0.020714	1e-06	0.000514	1e-06	0.003435	0.015336	0.154105	0.015336	0.016765
ENST00000448811	ENSG00000138386	NAB1	0	0	0	0	0	0	0.151265	0	0
ENST00000505764	ENSG00000061918	GUCY1B1	0	0	0	0	0.002832	0	0.151051	0	0.008362
ENST00000582416	ENSG00000171962	DRC3	0	0.015498	0	0.007351	0	0	0.150414	0	0
ENST00000418105	ENSG00000108622	ICAM2	0	0	0	0	0	0	0.150368	0	0
ENST00000537559	ENSG00000197415	VEPH1	0.002125	0.002448	0.002704	5e-05	0.041897	0.002171	0.150028	0.002171	0.001348
ENST00000275635	ENSG00000086730	LAT2	0	0	0	0	0	0	0.149358	0	0
ENST00000532857	ENSG00000101493	ZNF516	0	0	0	0	0	0	0.149281	0	0
ENST00000304538	ENSG00000170325	PRDM10	0	0	0	0	0	0	0.148962	0	0
TCONS_00000619	XLOC_000449	XLOC_000449	0	0	0	0	0	0	0.148808	0	0
ENST00000367079	ENSG00000123836	PFKFB2	0	0.01467	0	0.037791	0	0	0.148566	0	0
ENST00000509064	ENSG00000114544	SLC41A3	0	0	0	0	0	0	0.147168	0	0
ENST00000368382	ENSG00000163462	TRIM46	0	0	0	0	0.000794	0.017809	0.1457	0.017809	0
ENST00000551468	ENSG00000174243	DDX23	0.011649	0	0.00417	0.022552	0.008587	0.002004	0.144182	0.002004	0
ENST00000533021	ENSG00000167333	TRIM68	0	0	0	0	0	0	0.143559	0	0
ENST00000593209	ENSG00000167925	GHDC	0.003254	0	0	0.003013	0	0	0.139488	0	0
ENST00000433496	ENSG00000163918	RFC4	0.004063	0.002485	0	0.003999	0	0	0.139474	0	0.001141
ENST00000253392	ENSG00000131080	EDA2R	0	0	0	0	0	0	0.138769	0	0
ENST00000370779	ENSG00000101928	MOSPD1	0.001074	0.000737	0.000853	0.000482	0.001509	0.000702	0.137486	0.000702	0.001714
ENST00000535561	ENSG00000112096	SOD2	0	0	0	0	0	0	0.137147	0	0
ENST00000342916	ENSG00000146648	EGFR	0.005021	0	0	0	0	0.000188	0.137091	0.000188	0.000815
ENST00000401630	ENSG00000136244	IL6	0	0	0	0	0	0	0.136846	0	0
ENST00000277749	ENSG00000196932	TMEM26	0	0	0	0	0	0	0.134129	0	0
ENST00000645493	ENSG00000168036	CTNNB1	0	0	0.000802	0	0	0	0.132499	0	0.000824
ENST00000498737	ENSG00000184983	NDUFA6	0.024847	0.000696	0.001771	0.00072	0.016851	0.014059	0.131965	0.014059	0.001538
ENST00000637614	ENSG00000182220	ATP6AP2	0	0	0	0	0	0	0.131219	0	0
ENST00000010132	ENSG00000010219	DYRK4	0	0	0	0	0	0	0.130752	0	0
ENST00000405964	ENSG00000154642	C21orf91	0	0	0	0	0	0	0.130509	0	0
ENST00000551900	ENSG00000012822	CALCOCO1	0.032673	0	0	0	0	0	0.130485	0	0
ENST00000440431	ENSG00000153253	SCN3A	0	0	0	0	0	0	0.127305	0	0
ENST00000451299	ENSG00000164162	ANAPC10	9e-05	0.002101	3.1e-05	2.4e-05	0.00163	9.3e-05	0.126837	9.3e-05	0.00644
ENST00000591834	ENSG00000267281	ATF7	0	0	0	0	0	0	0.126256	0	0
ENST00000525640	ENSG00000136874	STX17	0.004478	0	0.003227	0.001229	0.000268	0.002548	0.12479	0.002548	0
ENST00000383772	ENSG00000077092	RARB	0	0	0	0	0	0	0.123545	0	0.029783
ENST00000428711	ENSG00000106070	GRB10	0.001663	0.001814	0	0	0.000559	0.001298	0.123221	0.001298	0.035545
ENST00000566442	ENSG00000214013	GANC	0.024483	0	0	0	0	0	0.122732	0	0
ENST00000413622	ENSG00000143570	SLC39A1	0	0	0	0	0.056205	0	0.121438	0	0
ENST00000623675	ENSG00000221878	PSG7	0	0	0	0	0	0	0.12043	0	0
ENST00000558054	ENSG00000177508	IRX3	0	0	0	0	0	0	0.11931	0	0
ENST00000601322	ENSG00000125648	SLC25A23	0	0	0	0	0	0	0.118372	0	0.005846
ENST00000373982	ENSG00000147130	ZMYM3	0.003317	0.000562	4.2e-05	0.000117	0.00558	0.005154	0.118172	0.005154	0.006225
ENST00000555611	ENSG00000198894	CIPC	0.006556	0	0	0.002142	0	0.010015	0.117458	0.010015	0
ENST00000437761	ENSG00000085063	CD59	1e-06	0	0	0	0	0.015662	0.115459	0.015662	0
ENST00000331397	ENSG00000183878	UTY	0	0.014022	0.023371	0	0	0	0.114863	0	0.010656
ENST00000581285	ENSG00000184060	ADAP2	0	0	0	0	0	0	0.114777	0	0
ENST00000509180	ENSG00000109775	UFSP2	0.01169	0	0	0.037867	0.003884	0.003398	0.114357	0.003398	0
ENST00000398343	ENSG00000160190	SLC37A1	0	0.004156	0	0	0	0	0.113952	0	0.006417
ENST00000556148	ENSG00000150527	MIA2	0	0.026322	0	0	0	0.004753	0.113943	0.004753	0
ENST00000372584	ENSG00000127124	HIVEP3	0	0	0	0	0	0	0.113657	0	0.009317
ENST00000451794	ENSG00000163121	NEURL3	0	0	0	0	0	0	0.112581	0	0
ENST00000578396	ENSG00000141627	DYM	0	0	0	0	0	0	0.112529	0	0
ENST00000470151	ENSG00000082996	RNF13	0	0	0	0	0	0	0.111765	0	0
ENST00000376716	ENSG00000197619	ZNF615	0	0	0	0	0.003738	0	0.111594	0	0
ENST00000515420	ENSG00000109572	CLCN3	0	0	0	0	0	0	0.110241	0	0
ENST00000395332	ENSG00000126522	ASL	0.003065	0.003672	0.008121	0.004149	0.010229	0.003903	0.109862	0.003903	0.003545
ENST00000646988	ENSG00000110911	SLC11A2	0	0.002602	0	0	0.00713	0	0.10886	0	0
ENST00000557084	ENSG00000054654	SYNE2	0.003523	0.00183	0.000812	0.016687	0.003236	0.00059	0.108407	0.00059	0.01679
ENST00000409102	ENSG00000178826	TMEM139	0	0	0	0	0	0	0.108213	0	0
ENST00000509832	ENSG00000145730	PAM	0	0	0	0	0	0	0.107431	0	0.002664
ENST00000396466	ENSG00000147604	RPL7	0	0	0	0	0	0.002514	0.107359	0.002514	0.003858
ENST00000455100	ENSG00000134864	GGACT	0.009151	0	0.014825	0	0	0	0.106045	0	0
ENST00000587152	ENSG00000125746	EML2	0	0	0	0	0	0.000752	0.106026	0.000752	0
ENST00000260128	ENSG00000137573	SULF1	0.00228	0.009467	0.003237	0.004689	0.007504	0	0.105304	0	0
ENST00000353917	ENSG00000124159	MATN4	0	0	0	0	0	0	0.104432	0	0
ENST00000586178	ENSG00000011258	MBTD1	1e-06	0	0.007907	0.02816	0	2e-06	0.103278	2e-06	7e-06
ENST00000545955	ENSG00000183878	UTY	0	0.018758	0.017303	0	0	0	0.103018	0	0.000752
ENST00000358161	ENSG00000197694	SPTAN1	0	0	0	0	0	0	0.102757	0	0
ENST00000529027	ENSG00000116497	S100PBP	0	0	0	0	0	0	0.102166	0	0
ENST00000646371	ENSG00000169814	BTD	0	0	0	0.000164	0	0	0.100785	0	0
ENST00000369039	ENSG00000143382	ADAMTSL4	0	0	0	0	0	0.020015	0.100686	0.020015	0
ENST00000578305	ENSG00000125457	MIF4GD	0	0	0	0	0	0	0.100669	0	0
ENST00000424398	ENSG00000242612	DECR2	0	0	0	0	0	0	0.100488	0	0
ENST00000533792	ENSG00000166387	PPFIBP2	0	0	0	0	0	0	0.100093	0	0
ENST00000428704	ENSG00000116478	HDAC1	0	0	0.013294	0	0	0	0.09996	0	0.019002
ENST00000578379	ENSG00000108622	ICAM2	0.021986	0	0	0	0	0	0.099842	0	0
ENST00000393679	ENSG00000110195	FOLR1	0	0	0	0	0	0	0.098686	0	0
ENST00000229332	ENSG00000111729	CLEC4A	0	0.043244	0	0	0	0.002895	0.098341	0.002895	0
ENST00000582290	ENSG00000141574	SECTM1	0.0041	0	0	0	0	0	0.097186	0	0
ENST00000518419	ENSG00000104231	ZFAND1	0	0	0	0.043878	0	0	0.096609	0	0
TCONS_00361289	ENSG00000002745	WNT16	0	0	0	0	0	0	0.096034	0	0
ENST00000578190	ENSG00000108654	DDX5	0	0	0	0.008952	0	0.013333	0.095371	0.013333	0
ENST00000590770	ENSG00000131473	ACLY	0	0	0	0	0	0	0.09518	0	0
TCONS_00342296	XLOC_136999	XLOC_136999	0	0	0	0	0	0	0.095145	0	0
ENST00000496537	ENSG00000169629	RGPD8	0	0	0	0	0	0	0.094306	0	0
ENST00000448612	ENSG00000184465	WDR27	0.006952	0	0.00132	4e-06	0	0	0.094043	0	0
ENST00000306560	ENSG00000103044	HAS3	0	0.011555	0	0.009631	0	0	0.092533	0	0
ENST00000452479	ENSG00000141337	ARSG	0	0	0	0	0	0	0.091995	0	0
ENST00000397692	ENSG00000182362	YBEY	0.037155	0	0	0	0	0	0.091676	0	0
ENST00000412827	ENSG00000130021	PUDP	0.033453	0	0	0	0	0	0.091443	0	0
ENST00000401705	ENSG00000213889	PPM1N	0	0	0	0	0	0	0.09121	0	0
ENST00000649855	ENSG00000127955	GNAI1	0	0	0	0	0	0.001509	0.091002	0.001509	0
ENST00000493969	ENSG00000133561	GIMAP6	0	0	0	0	0	0	0.090985	0	0
ENST00000518761	ENSG00000185864	NPIPB4	1e-06	0	2.5e-05	0	0	0.000193	0.090444	0.000193	0
ENST00000651950	ENSG00000160563	MED27	0	0	0	0	0	0	0.090441	0	0
ENST00000577250	ENSG00000101782	RIOK3	0	0	0	0	0	0	0.090203	0	0
ENST00000312060	ENSG00000174177	CTU2	0	0	0	0	0	0	0.089864	0	0
ENST00000619223	ENSG00000091592	NLRP1	0	0	0	0	0	0	0.089385	0	0
ENST00000647748	ENSG00000088808	PPP1R13B	0	0.03171	0	0	0	0	0.089191	0	0
ENST00000546702	ENSG00000162433	AK4	0	0	0	0	0	0	0.089159	0	0
ENST00000563343	ENSG00000051108	HERPUD1	0	0	0	0	0	0	0.08893	0	0
ENST00000606364	ENSG00000119139	TJP2	0	0	0	0	0	0	0.087523	0	0
ENST00000353126	ENSG00000126091	ST3GAL3	0	0	0.043154	0	0	0	0.087205	0	0
ENST00000263087	ENSG00000083457	ITGAE	0.00202	0.007406	0.002278	0.006682	0	0	0.087133	0	0.001874
ENST00000578071	ENSG00000006744	ELAC2	0	0	0	0	0	0	0.086801	0	0
ENST00000420501	ENSG00000186642	PDE2A	0.028575	0	0	0	0	0	0.086193	0	0.001226
ENST00000519407	ENSG00000183137	CEP57L1	0	0	0.024311	0	0	0.001863	0.08603	0.001863	0.003293
ENST00000425167	ENSG00000196689	TRPV1	0	0	0	0	0	0	0.08525	0	0
ENST00000651652	ENSG00000181585	TMIE	0	0	0	0.002029	0	0	0.085027	0	0.003283
ENST00000405076	ENSG00000115204	MPV17	0	0	0	0	0	0	0.084909	0	0
ENST00000521178	ENSG00000108852	MPP2	0	0	0	0	0	0	0.084092	0	0
ENST00000425073	ENSG00000001631	KRIT1	0.027145	0	0	0	0	0	0.083569	0	0
ENST00000449375	ENSG00000042445	RETSAT	0	0	0	0	0	0	0.083398	0	0
ENST00000491165	ENSG00000176542	USF3	0.007514	0	4.9e-05	0	0	1.5e-05	0.082885	1.5e-05	0
ENST00000592725	ENSG00000256771	ZNF253	0.001129	0	0	0.003077	0.00601	0.002112	0.082535	0.002112	0.002533
ENST00000531164	ENSG00000149292	TTC12	0	0	0	0	0	0	0.082129	0	0
ENST00000453627	ENSG00000170852	KBTBD2	0	0	0	0.027808	0	0	0.081957	0	0.009454
ENST00000548312	ENSG00000122986	HVCN1	0	0.003034	0	0	0	0.003164	0.081554	0.003164	0.00743
ENST00000650508	ENSG00000079277	MKNK1	0.001898	0.004099	0.001667	0.000618	0.009547	0.003067	0.080199	0.003067	0.002254
ENST00000462331	ENSG00000128573	FOXP2	0	0	0	0	0	0	0.079961	0	0
ENST00000573984	ENSG00000167740	CYB5D2	0	0	0	0	0	0.001948	0.07962	0.001948	0
ENST00000584335	ENSG00000002919	SNX11	0.001479	0	0	0	0.005539	0	0.079011	0	0.008087
ENST00000422569	ENSG00000130707	ASS1	0	0	0	0	0	0.002543	0.078652	0.002543	0
ENST00000375019	ENSG00000165138	ANKS6	0	0	0	0.000591	0	0	0.078231	0	0
ENST00000528014	ENSG00000137731	FXYD2	0	0	0	0	0	0	0.078218	0	0
ENST00000404397	ENSG00000213626	LBH	0	0	0	0	0	0	0.077352	0	0
ENST00000440102	ENSG00000107105	ELAVL2	0	0	0.007826	0.004898	0	0	0.077087	0	0.008554
ENST00000572863	ENSG00000162078	ZG16B	0	0	0.025812	0	0	0	0.076791	0	0
ENST00000438054	ENSG00000153094	BCL2L11	0	0	0	0	0	0	0.076322	0	0.017006
ENST00000415265	ENSG00000178252	WDR6	0	0	0	0	0	0	0.075644	0	0
ENST00000511320	ENSG00000087206	UIMC1	0	0.024711	0	0	0	0	0.075059	0	0
ENST00000567610	ENSG00000180917	CMTR2	0	0	0	0	0	0	0.074987	0	0
ENST00000515658	ENSG00000188153	COL4A5	0	0	0	0	0	0	0.07472	0	0
ENST00000521943	ENSG00000198586	TLK1	0	0	0	0	0	0	0.074665	0	0
ENST00000552604	ENSG00000123329	ARHGAP9	0	0	0	0	0	0	0.074563	0	0
ENST00000558014	ENSG00000137872	SEMA6D	0	0.014415	0	0.003423	0	0	0.074145	0	0.002711
ENST00000403744	ENSG00000100266	PACSIN2	0	0	0	0	0	0	0.073172	0	0
ENST00000503683	ENSG00000150961	SEC24D	0	0.003716	0.005822	0.004477	0.000919	0	0.072681	0	0
ENST00000636171	ENSG00000104763	ASAH1	0	0	0	0	0	0	0.072547	0	0
ENST00000519394	ENSG00000155508	CNOT8	0	0	0	0	0.000573	0	0.072324	0	0
ENST00000430013	ENSG00000160200	CBS	0	0	0	0	0	0	0.072031	0	0
ENST00000510015	ENSG00000138777	PPA2	0	0	0	0	0	0	0.071881	0	0
ENST00000522165	ENSG00000197467	COL13A1	0	0	0	0	0	0	0.071807	0	0
ENST00000535545	ENSG00000162148	PPP1R32	0	0.032124	0	0	0	0	0.071649	0	0
ENST00000244174	ENSG00000124334	IL9R	0	0	0	0	0	0	0.071273	0	0.026126
ENST00000599389	ENSG00000079385	CEACAM1	0	0	0	0	0	0	0.071172	0	0
ENST00000458354	ENSG00000130822	PNCK	0	0	0	0	0	0	0.070134	0	0
ENST00000452892	ENSG00000101331	CCM2L	0	0	0.001779	0	0.003953	0.011689	0.069588	0.011689	0.003147
ENST00000588992	ENSG00000126246	IGFLR1	0	0	0	0	0	0	0.069288	0	0
ENST00000557751	ENSG00000100612	DHRS7	0	0	0	0	0	0	0.068983	0	0
ENST00000409108	ENSG00000153234	NR4A2	0	0.024934	0	0	0	0	0.068724	0	0
ENST00000414984	ENSG00000011376	LARS2	0	0	0	0	0	0	0.068367	0	0
ENST00000371016	ENSG00000198160	MIER1	0.001255	0.000816	0.001419	0	0.001587	0.001416	0.068212	0.001416	0.0015
ENST00000492245	ENSG00000150459	SAP18	0	0	0	0	0	0	0.068132	0	0
ENST00000540185	ENSG00000164896	FASTK	0	0	0	0	0	0	0.067648	0	0
ENST00000592789	ENSG00000186567	CEACAM19	0	0	0	0	0	0	0.067255	0	0
ENST00000489809	ENSG00000059378	PARP12	0	0	0	0	0	0	0.066847	0	0.007374
ENST00000409196	ENSG00000204120	GIGYF2	0	0	0	0	0	0	0.066787	0	0
ENST00000393681	ENSG00000110195	FOLR1	0	0	0	0	0	0	0.066497	0	0
ENST00000529912	ENSG00000054938	CHRDL2	0	0	0	0	0	0	0.066477	0	0.011144
ENST00000595535	ENSG00000160460	SPTBN4	0	0	0	0	0	0	0.065685	0	0
ENST00000305392	ENSG00000169403	PTAFR	0	0	0	0	0	0	0.065401	0	0
ENST00000566121	ENSG00000140931	CMTM3	0	0.022124	0.006496	0	0	0	0.065144	0	0
ENST00000598773	ENSG00000105245	NUMBL	0.003225	0.002893	0.007364	0.000858	0.004163	0	0.064963	0	0.000864
ENST00000464818	ENSG00000163932	PRKCD	0	0	0	0	0	0	0.064712	0	0
ENST00000587847	ENSG00000095932	SMIM24	0.020981	0	0	0.008933	0	0	0.064659	0	0
ENST00000416789	ENSG00000091409	ITGA6	0	0	0	0	0	0	0.064491	0	0
ENST00000651961	ENSG00000111305	GSG1	0	0	0	0	0	0.003218	0.064243	0.003218	0.009949
ENST00000493412	ENSG00000198947	DMD	0	0	0	0	0	0	0.064218	0	0
ENST00000582880	ENSG00000167281	RBFOX3	0	0	0	0	0	0	0.064119	0	0
ENST00000520727	ENSG00000066827	ZFAT	0	0	0	0	0	0	0.064008	0	0
ENST00000502713	ENSG00000163625	WDFY3	0	0	0	0	0	0	0.063644	0	0
ENST00000424519	ENSG00000171100	MTM1	0.002987	0	0.003166	0	0	0.000381	0.062242	0.000381	0
ENST00000494364	ENSG00000166922	SCG5	0	0	0	0	0	0	0.062072	0	0
ENST00000642934	ENSG00000126091	ST3GAL3	0	0	0.029197	0	0	0	0.060704	0	0
ENST00000446815	ENSG00000128585	MKLN1	0.001265	0.000292	0.00023	0.000234	0.001045	0.000953	0.060634	0.000953	0.000259
ENST00000543245	ENSG00000072778	ACADVL	0	0	0	0	0.014444	0	0.060287	0	0
ENST00000291270	ENSG00000104936	DMPK	0.000868	0.001827	0.000192	0.000116	0.000182	0.000891	0.060255	0.000891	0.000464
ENST00000378096	ENSG00000125691	RPL23	0	0	0	0	0	0	0.060233	0	0
ENST00000608739	ENSG00000196363	WDR5	0	0	0	0	0	0	0.059721	0	0
ENST00000583093	ENSG00000141574	SECTM1	0	0	0	0	0	0	0.05968	0	0
ENST00000562510	ENSG00000048471	SNX29	0.0147	0	0	0	0	0	0.059526	0	0.006607
ENST00000547044	ENSG00000118308	LRMP	0	0	0	0	0	0	0.058772	0	0
ENST00000455070	ENSG00000124201	ZNFX1	0.000894	0.000205	0	0.000388	0.002165	0.018598	0.058636	0.018598	0.001631
ENST00000525497	ENSG00000077616	NAALAD2	0	0	0	0	0	0	0.057943	0	0
ENST00000643227	ENSG00000124570	SERPINB6	0	0	0	0	0	0	0.057535	0	0
ENST00000594162	ENSG00000008382	MPND	0	0	0	0	0	0	0.057447	0	0
ENST00000395029	ENSG00000081059	TCF7	0	0.002676	0	0.02162	0	0	0.057114	0	0
ENST00000544871	ENSG00000174206	C12orf66	0.002059	0.001143	0.002422	0.001074	0.002373	0.004551	0.056941	0.004551	0.002423
ENST00000473378	ENSG00000147168	IL2RG	0	0	0	0	0	0	0.056688	0	0
ENST00000529175	ENSG00000147642	SYBU	0	0	0	0	0	0.00273	0.056411	0.00273	0
ENST00000460545	ENSG00000133138	TBC1D8B	0.000169	0.005812	0.000685	0.000315	0.000133	0.000965	0.055228	0.000965	1.4e-05
ENST00000542951	ENSG00000162148	PPP1R32	0	0	0	0	0	0	0.054358	0	0
ENST00000513209	ENSG00000273049	AC012531.3	0	0.000112	0	0	0	0	0.053702	0	0
ENST00000601373	ENSG00000126456	IRF3	0	0	0	0.00347	0	0.00401	0.053649	0.00401	0
ENST00000612130	ENSG00000184182	UBE2F	0.001712	0.001107	0.00189	0	0.000619	0.001089	0.053549	0.001089	0
ENST00000382543	ENSG00000196526	AFAP1	0	0	0	0	0	0	0.053274	0	0
ENST00000432059	ENSG00000120519	SLC10A7	0	0	0.004644	0	0.011588	0	0.05257	0	0
ENST00000409611	ENSG00000240583	AQP1	0	0	0	0	0	0	0.052453	0	0.011234
ENST00000551467	ENSG00000087502	ERGIC2	0	0	0	0	0	0.020342	0.052289	0.020342	0
ENST00000286380	ENSG00000155918	RAET1L	0	0	0	0	0.011502	0	0.052275	0	0
ENST00000575909	ENSG00000141198	TOM1L1	0	0	0	0	0	0	0.05223	0	0
ENST00000416865	ENSG00000112851	ERBIN	0	0	0	0	0	0	0.052184	0	0
ENST00000326595	ENSG00000180376	CCDC66	0	0	0	0	0	0	0.05203	0	0.004335
ENST00000510133	ENSG00000164024	METAP1	0	0	0	0	0	0	0.051893	0	0
ENST00000399132	ENSG00000188517	COL25A1	0	0	0	0	0	0	0.051563	0	3.5e-05
ENST00000644922	ENSG00000126091	ST3GAL3	0	0	0.023861	0	0	0	0.051544	0	0
ENST00000518845	ENSG00000188994	ZNF292	0	0	0	0	0	0	0.051471	0	0
ENST00000577675	ENSG00000108342	CSF3	0	0	0	0	0	0	0.051115	0	0
ENST00000427544	ENSG00000188958	UTS2B	0	0	0	0	0	0	0.050888	0	0
ENST00000513992	ENSG00000145358	DDIT4L	0	0	0	0	0.008646	0.005365	0.050842	0.005365	0
ENST00000510119	ENSG00000158402	CDC25C	0	0	0	0	0	0	0.050713	0	0
ENST00000341206	ENSG00000267206	LCN6	0	0	0	0	0	0	0.050601	0	0
ENST00000649748	ENSG00000243244	STON1	0	0	0	0	0	0	0.050295	0	0
ENST00000554867	ENSG00000100462	PRMT5	0.016901	0	0	0	0	0	0.050154	0	0
ENST00000551931	ENSG00000050426	LETMD1	0	0	0	0	0	0	0.050145	0	0
ENST00000637191	ENSG00000122877	EGR2	0	0	0	0	0	0	0.049772	0	0
ENST00000361134	ENSG00000198569	SLC34A3	0	0	0	0	0	0	0.049642	0	0
ENST00000263851	ENSG00000104432	IL7	0	0	0	0	0	0.001532	0.049281	0.001532	0
ENST00000591759	ENSG00000196263	ZNF471	0	0	0	0.005778	0	0	0.049159	0	0
ENST00000328559	ENSG00000109771	LRP2BP	0	0	0	0	0	0.002529	0.048747	0.002529	0
ENST00000514999	ENSG00000196353	CPNE4	0	0	0	0	0	0	0.048704	0	0
ENST00000528487	ENSG00000162298	SYVN1	0	0	0	0	0	0	0.04816	0	0
ENST00000286452	ENSG00000155980	KIF5A	0	0.001347	0	0	0	0	0.048086	0	0
ENST00000371719	ENSG00000148680	HTR7	0	0	0	0	0	0	0.048083	0	0
ENST00000444807	ENSG00000133665	DYDC2	0	0	0	0	0	0.007968	0.047633	0.007968	0
ENST00000455090	ENSG00000165887	ANKRD2	0	0	0	0	0	0.009583	0.047624	0.009583	0
ENST00000409474	ENSG00000082126	MPP4	0	0	0.000516	0.000739	0.002103	0.004384	0.047454	0.004384	0
ENST00000415112	ENSG00000186088	GSAP	0	0	0	0	0	0	0.04729	0	0
ENST00000471901	ENSG00000154175	ABI3BP	0	0.008128	0	0	0	0	0.047024	0	0
ENST00000464906	ENSG00000148985	PGAP2	0	0.002766	0	0	0.008191	0	0.046458	0	0
ENST00000556603	ENSG00000100605	ITPK1	0	0	0	0	0	0	0.046205	0	0
ENST00000464909	ENSG00000237651	C2orf74	0	0	0	0	0	0	0.046135	0	2e-06
ENST00000616212	ENSG00000068028	RASSF1	0.0002	0	0.00469	0	0.001562	0.001196	0.046058	0.001196	3.5e-05
ENST00000585682	ENSG00000164125	GASK1B	0.001277	0.000416	0.00028	0.000119	2.6e-05	0.00137	0.045943	0.00137	0.000348
ENST00000645986	ENSG00000147044	CASK	0	0	0	0	0.000975	0	0.045892	0	0
ENST00000421765	ENSG00000122390	NAA60	0	0	0	0	0	0	0.0456	0	0
ENST00000624761	ENSG00000178913	TAF7	0	0	0	0	0	0	0.045527	0	0
ENST00000465278	ENSG00000151067	CACNA1C	0.020837	0	0	0	0	0	0.045075	0	0
ENST00000318007	ENSG00000163110	PDLIM5	0	0	0	0.000826	0	0	0.044756	0	0.000616
ENST00000648459	ENSG00000147099	HDAC8	0.000132	0.001916	0	0	0	0.014428	0.04452	0.014428	0
ENST00000477601	ENSG00000144802	NFKBIZ	0	0	0	0	0	0	0.044256	0	0
ENST00000529833	ENSG00000181135	ZNF707	0	0.008593	0.003662	0	0	0	0.043967	0	0
ENST00000476818	ENSG00000143199	ADCY10	0	0	0	0	0	0	0.043957	0	0
ENST00000478262	ENSG00000286105	AL353579.1	0	0	0	0	0	0	0.043723	0	0
ENST00000403486	ENSG00000243130	PSG11	0	0	0	0	0	1.2e-05	0.043695	1.2e-05	0
ENST00000508793	ENSG00000141510	TP53	0.004101	0	0	0	0	0.007643	0.043541	0.007643	0
ENST00000569101	ENSG00000205336	ADGRG1	0	0	0	0	0	0	0.043264	0	0
ENST00000472037	ENSG00000010803	SCMH1	0	0	0	0	0	0	0.042596	0	0
ENST00000331162	ENSG00000185177	ZNF479	0	0	0	0	0	0.006515	0.042092	0.006515	0.008832
ENST00000503591	ENSG00000141510	TP53	0	0	0	0	0	0	0.042067	0	0
ENST00000627631	ENSG00000137802	MAPKBP1	0	0	0	0	2.3e-05	0	0.042048	0	0
ENST00000621537	ENSG00000153815	CMIP	0	0	0	0	0	0	0.041772	0	0
ENST00000423893	ENSG00000136487	GH2	0	0	0	0	0	0	0.041446	0	0.000196
ENST00000575403	ENSG00000108641	B9D1	0	0	0	0	0	0	0.041179	0	0
ENST00000439952	ENSG00000177409	SAMD9L	0	0	0	0	0	0	0.040633	0	0
ENST00000371360	ENSG00000203985	LDLRAD1	0	0	0	0	0.003882	0.006243	0.040576	0.006243	2.6e-05
ENST00000395144	ENSG00000114378	HYAL1	0	0	0	0	0	0	0.040489	0	0
ENST00000511926	ENSG00000109320	NFKB1	0.008895	0.002089	0.004282	0	0.00164	0	0.039804	0	0
ENST00000586382	ENSG00000108799	EZH1	0	0	0	0	0	0	0.039152	0	0
ENST00000328444	ENSG00000182545	RNASE10	0	0	0	0	0	0	0.038952	0	0
ENST00000421345	ENSG00000004866	ST7	0.000383	0	0	0	0	0	0.03893	0	0
ENST00000435831	ENSG00000169554	ZEB2	6.7e-05	6e-06	0	0	0	0	0.038891	0	0.000128
ENST00000412676	ENSG00000174600	CMKLR1	0	0.00031	0	0	0	0	0.038845	0	0
ENST00000252336	ENSG00000130052	STARD8	0	0	0	0.000132	0.000417	0	0.038719	0	0
ENST00000452897	ENSG00000163898	LIPH	0	0	0	0	0	0	0.038592	0	0
ENST00000447952	ENSG00000166278	C2	0	0	0	0	0	0.000322	0.038471	0.000322	0
ENST00000373017	ENSG00000148346	LCN2	0	0.000231	0	0	0	0	0.038314	0	0.01266
ENST00000639249	ENSG00000170417	TMEM182	0	0	0	0	0	0	0.037891	0	0
ENST00000648057	ENSG00000130487	KLHDC7B	0	0	0	0	0	0	0.037611	0	0
ENST00000394779	ENSG00000165181	SHOC1	0	0	0.002317	0	0	0	0.037544	0	0
ENST00000594294	ENSG00000127507	ADGRE2	0	0	0	0	0.006003	0	0.037385	0	0
ENST00000503842	ENSG00000116731	PRDM2	0	0	0	0	0	0	0.037335	0	0
ENST00000495380	ENSG00000186086	NBPF6	0	0	0.004557	0	0	0	0.037108	0	0
ENST00000342412	ENSG00000101197	BIRC7	0	0	0	0	0	0	0.036887	0	0
ENST00000586055	ENSG00000099864	PALM	0	0	0	0	0	0	0.0365	0	0.01213
ENST00000616615	ENSG00000100206	DMC1	0	0	0	0	0	0	0.036362	0	0
ENST00000458656	ENSG00000173805	HAP1	0	0	0	0	0	0	0.036315	0	0
ENST00000423653	ENSG00000162004	CCDC78	0	0	0	0	0	0	0.036188	0	0
ENST00000458290	ENSG00000171346	KRT15	0.006661	0	0	0	0	0.004052	0.036125	0.004052	0
ENST00000599343	ENSG00000196876	SCN8A	0	0	0.004487	0	0	0.005198	0.035826	0.005198	0
ENST00000417766	ENSG00000130592	LSP1	0	0	0	0	0	0	0.03582	0	0
ENST00000531467	ENSG00000064687	ABCA7	0	0	0.002216	0.002272	0	0	0.035681	0	0.001942
ENST00000441619	ENSG00000128340	RAC2	0	0	0	0	0	0	0.035379	0	0
ENST00000530996	ENSG00000254505	CHMP4A	0	0	0	0	0	0	0.035295	0	0
ENST00000525009	ENSG00000175224	ATG13	0	0	0	0	0	0	0.03503	0	0
ENST00000303757	ENSG00000204482	LST1	0	0	0	0	0	0	0.035016	0	0
ENST00000598915	ENSG00000131400	NAPSA	0	0	0	0	0	0	0.034887	0	0
ENST00000621976	ENSG00000184156	KCNQ3	0	0	0	0	0	0	0.03463	0	0
ENST00000546756	ENSG00000161835	GRASP	0	0	0	0	0	0	0.034444	0	0
ENST00000550758	ENSG00000011465	DCN	0	0	0	0	0	0	0.034417	0	0
ENST00000414034	ENSG00000167925	GHDC	0	0.008433	0	0	0	0	0.034153	0	0
ENST00000555429	ENSG00000092140	G2E3	0	0	0	0	0	0	0.033872	0	0
ENST00000554088	ENSG00000126822	PLEKHG3	0	0	0	0	0	0	0.033834	0	0
ENST00000440804	ENSG00000129450	SIGLEC9	0	0	0	0	0	0	0.033743	0	0.008778
ENST00000553830	ENSG00000027075	PRKCH	0.00603	0	0	0	0	0.007444	0.033677	0.007444	0
ENST00000558145	ENSG00000156958	GALK2	0.002826	0.012394	0	0	0	0	0.033496	0	0
ENST00000366778	ENSG00000163050	COQ8A	0.002056	4.2e-05	0.000432	5.9e-05	0.00255	0.001792	0.033474	0.001792	0.001604
ENST00000426088	ENSG00000106772	PRUNE2	0	0	0	0	0	0	0.033462	0	0
ENST00000378538	ENSG00000066336	SPI1	0	0	0	0.005102	0	0	0.0334	0	0
ENST00000414644	ENSG00000115841	RMDN2	0	0	0	0	0	0	0.033355	0	0
ENST00000578321	ENSG00000128487	SPECC1	0	0	0	0	0	0	0.033177	0	0
ENST00000619224	ENSG00000143171	RXRG	0	0	0	0	0	0.001805	0.03315	0.001805	0
ENST00000649643	ENSG00000137558	PI15	0	0	0	0	0	0	0.03308	0	0
ENST00000538547	ENSG00000125846	ZNF133	0	0	0	0	0	0	0.032796	0	0
ENST00000583218	ENSG00000108342	CSF3	0	0	0	0	0	0	0.032608	0	0
ENST00000592796	ENSG00000131096	PYY	0	0	0	0	0	0	0.032318	0	0
ENST00000582955	ENSG00000073584	SMARCE1	0	0	0	0	0	0	0.032308	0	0
ENST00000373206	ENSG00000092847	AGO1	0	0	0	0	0	0	0.032035	0	0
ENST00000521185	ENSG00000186918	ZNF395	0.003288	0	0	0	0	0.002585	0.031667	0.002585	0
ENST00000360872	ENSG00000213658	LAT	0	0	0	0	0	0	0.031666	0	0
ENST00000433758	ENSG00000106025	TSPAN12	0	0	0	0	0	0	0.031623	0	0
ENST00000377242	ENSG00000120594	PLXDC2	0	0	0	0	0	0	0.031417	0	0.002728
ENST00000401779	ENSG00000177989	ODF3B	0	0	0	0.008237	0	0	0.031348	0	0
ENST00000649065	ENSG00000179455	MKRN3	0.005358	0	0	0	0	0.006175	0.031006	0.006175	0
ENST00000353068	ENSG00000120049	KCNIP2	0.003078	0	0	0	0	0.004525	0.030796	0.004525	0
ENST00000415929	ENSG00000136205	TNS3	0.003564	0	0	0	0	0	0.030757	0	0
ENST00000465026	ENSG00000251503	CENPS-CORT	0	0	0	0	0	0	0.030755	0	0
ENST00000648592	ENSG00000178297	TMPRSS9	0	0	0	0	0	0	0.030576	0	0
ENST00000615905	ENSG00000275722	LYZL6	0	0	0.008604	0	0	0	0.030542	0	0
ENST00000302303	ENSG00000080298	RFX3	0	0.012144	0	0	0	0	0.030531	0	0
ENST00000361443	ENSG00000164651	SP8	0	0	0	0	0	0	0.030047	0	0
ENST00000397846	ENSG00000160255	ITGB2	0	0	0	0	0	0	0.030032	0	0
ENST00000367501	ENSG00000116668	SWT1	0	0	0	0	0	0	0.029959	0	0
ENST00000358359	ENSG00000145725	PPIP5K2	1.8e-05	3.3e-05	8e-06	3.4e-05	0.000128	7.6e-05	0.029816	7.6e-05	0.001967
ENST00000519317	ENSG00000048392	RRM2B	0	0	0	0	0	0	0.029656	0	0
ENST00000597445	ENSG00000183019	MCEMP1	0	0	0	0	0	0	0.029586	0	0
ENST00000565039	ENSG00000135702	CHST5	0	0	0	0	0	0	0.029451	0	0
ENST00000521935	ENSG00000147526	TACC1	0	0	0	0	0	0	0.029154	0	0
ENST00000530841	ENSG00000147642	SYBU	0	0	0	0	0	0	0.029098	0	0
ENST00000396275	ENSG00000179826	MRGPRX3	0	0	0	0	0	0	0.028591	0	0.004396
ENST00000514472	ENSG00000160867	FGFR4	0	0	0	0	0	0	0.028446	0	0
ENST00000536884	ENSG00000139890	REM2	0	0	0	0	0	0	0.028289	0	0
ENST00000496712	ENSG00000162599	NFIA	0.00966	0	0	0	0	0	0.027964	0	0
ENST00000436069	ENSG00000178028	DMAP1	0.001131	0.000393	0.000907	0.00048	0.000516	0.000841	0.027896	0.000841	0.00693
ENST00000599546	ENSG00000011422	PLAUR	0	0	0	0	0	0	0.027873	0	0
ENST00000533065	ENSG00000147642	SYBU	0	0	0	0	0	0	0.027761	0	0
ENST00000525000	ENSG00000168000	BSCL2	0	0	0	0	0	0	0.027717	0	0
ENST00000438977	ENSG00000117676	RPS6KA1	0	0	0	0	0	0	0.02768	0	0
ENST00000510978	ENSG00000145681	HAPLN1	0	0.006698	0	0	0	0	0.027584	0	0
ENST00000402753	ENSG00000217442	SYCE3	0	0	0	0	0	0	0.027312	0	0
ENST00000590764	ENSG00000126581	BECN1	0	0	0	0	0	0	0.027287	0	0
ENST00000508862	ENSG00000232859	LYRM9	0	0	0	0	0	0	0.027277	0	0.00024
ENST00000532498	ENSG00000231738	TSPAN19	0.000811	0	0	0	0	0	0.027251	0	0.0075
ENST00000373161	ENSG00000112212	TSPO2	0	0	0	0	0	0	0.026906	0	0
ENST00000426493	ENSG00000120913	PDLIM2	0	0.004981	0	0	0	0.000232	0.026692	0.000232	0
ENST00000441025	ENSG00000170152	AL391987.1	0	0	0	0	0	0	0.026516	0	0
ENST00000651525	ENSG00000286079	AL627230.3	0	0	0	0	0	0	0.026516	0	0
ENST00000379213	ENSG00000115808	STRN	0	0	0	0	0	0	0.026396	0	0
ENST00000532000	ENSG00000134955	SLC37A2	0	0	0	0	0	0	0.026283	0	0
ENST00000367908	ENSG00000117152	RGS4	0.0086	0	0	0	0	0	0.026217	0	0
ENST00000311734	ENSG00000115602	IL1RL1	0	0	0	0	0	0	0.02619	0	0
ENST00000435179	ENSG00000084453	SLCO1A2	0	0	0	0	0	0	0.026146	0	0
ENST00000627725	ENSG00000075651	PLD1	0	0	0	0	0	0	0.025601	0	0
ENST00000431153	ENSG00000197641	SERPINB13	0	0	0	0	0	0	0.025208	0	0
ENST00000652295	ENSG00000164047	CAMP	0	0.012525	0	0	0	0	0.02516	0	0
ENST00000261172	ENSG00000083782	EPYC	0	0	0	0	0	0	0.025127	0	0
ENST00000358991	ENSG00000176771	NCKAP5	0	0	0	0	0	0	0.024638	0	0.007552
ENST00000549265	ENSG00000183570	PCBP3	0.010592	0	0	0	0	0	0.024607	0	0
ENST00000368671	ENSG00000180745	CLRN3	0	0.008142	0	0	0	0	0.024534	0	0
ENST00000526528	ENSG00000136153	LMO7	0	0	0	0	0	0	0.02442	0	0
ENST00000586426	ENSG00000172000	ZNF556	0	0	0	0	0	0	0.024243	0	0
ENST00000652448	ENSG00000286098	AC008770.4	0	0	0	0	0	0	0.024058	0	0
ENST00000401885	ENSG00000100031	GGT1	0	0	0	0	0	0	0.024028	0	0
ENST00000534950	ENSG00000139178	C1RL	0	0	0	0	0	0	0.023865	0	0
ENST00000452857	ENSG00000062598	ELMO2	0	0	0	0	0	0	0.02377	0	0
ENST00000494165	ENSG00000168878	SFTPB	0	0	0	0	0	0	0.023715	0	0
ENST00000624277	ENSG00000260220	CCDC187	0	0	0	0	0	0.004789	0.023697	0.004789	0.00322
ENST00000463596	ENSG00000137074	APTX	0	0	0	0	0	0	0.023667	0	0
[truncated: 631 more rows]

## Sheet: mRNA_UV_cluster 6
transcript_id	gene_id	gene_name	C_0	UV_3	UV_6	UV_9	UV_12	UV_24	UV_48	UV_72	UV_96
[truncated: 1,382 more rows]

[truncated: 1 more sheets: mRNA_UV_cluster 7]
