# Supplementary material for: IncRNA‐ZFAS1, an Emerging Gate‐Keeper in DNA Damage‐Dependent Transcriptional Regulation
Source: Adv Sci (Weinh). 2025 May 24;12(31):e12385. doi: 10.1002/advs.202412385 (PMC12376587; doi:10.1002/advs.202412385)
Supplement: Supplementary file 6 — Supplemental Table S5 [file ADVS-12-e12385-s005.xlsx]

## Sheet: lncRNA_No UV_cluster 1
transcript_id	gene_id	gene_name	C_0	C_3	C_6	C_9	C_12	C_24
ENST00000469289	ENSG00000243485	MIR1302-2HG	0.009493	0	0	0	0.003512	0
ENST00000607769	ENSG00000272438	AL645608.6	0.036498	0	0	0	0	0
ENST00000412115	ENSG00000237491	AL669831.5	0.006781	0	0	0	0	0
ENST00000434139	ENSG00000230415	LINC01786	0.006174	0	0	0	0	0
ENST00000428932	ENSG00000225905	AL391244.1	0.008272	0	0	0	0	0
ENST00000607013	ENSG00000272004	FO704657.1	0.02065	0	0	0	0	0
ENST00000442305	ENSG00000229393	AL139246.4	0.014883	0	0	0	0	0
ENST00000439488	ENSG00000236423	LINC01134	0.0094	9.8e-05	0	0	0	0.005051
ENST00000641757	ENSG00000284744	AL591163.1	0.005729	0	0	0	0	0
ENST00000641117	ENSG00000284735	AL139424.3	0.00566	0	0	0	0	0
ENST00000623689	ENSG00000237938	AL450998.3	0.013008	0	0	0	0	0
ENST00000317122	ENSG00000179743	AL450998.2	0.100101	0	0	0	0	0
ENST00000624517	ENSG00000279151	AL021920.1	0.018557	0	0	0	0	0
ENST00000635428	ENSG00000282843	AL590644.3	0.005049	0	0	0	0	0
ENST00000426428	ENSG00000236963	LINC01141	0.005265	0	0	0	0	0
ENST00000416470	ENSG00000235185	AL031727.2	0.007859	0	0	0	0	0
ENST00000604481	ENSG00000261326	LINC01355	0.0223	0	0	0	0	0
ENST00000641772	ENSG00000284726	AL109936.6	0.008544	0	0	0	0	0
ENST00000451217	ENSG00000235052	AL021154.1	0.021671	0	0	0	0	0
ENST00000477916	ENSG00000197880	MDS2	0.004424	0	0	0	0	0
ENST00000456316	ENSG00000229162	AL445471.1	0.009609	0	0	0	0	0
ENST00000648127	ENSG00000197989	SNHG12	0.00517	0.000773	1e-06	0	0	0
ENST00000619772	ENSG00000277958	RF00017	0.049549	0	0	0	0	0
ENST00000627421	ENSG00000225313	AL513327.1	0.013556	0	0	0	0	0
ENST00000432703	ENSG00000233246	AL513327.2	0.018702	0	0	0	0	0.009965
ENST00000433671	ENSG00000228436	AL139260.1	0.02848	0	0	0	0	0.011192
ENST00000453437	ENSG00000227278	AL603839.1	0.025395	0	0	0	0	0
ENST00000444042	ENSG00000225506	CYP4A22-AS1	0.022248	0	0.003835	0	0	0
ENST00000428794	ENSG00000228369	TXNDC12-AS1	0.008061	0	0	0	0	0
ENST00000460504	ENSG00000241745	RN7SL788P	0.062004	0	0	0	0.018042	0.009437
ENST00000452466	ENSG00000236723	AL606760.2	0.688726	0	0	0	0	0
ENST00000446686	ENSG00000232762	AL355483.3	0.003203	0	0	0	0	0
ENST00000641333	ENSG00000260971	AC119674.1	0.000818	0	0	0	0	0
ENST00000641445	ENSG00000260971	AC119674.1	0.017483	0	0	0	0	0
ENST00000641442	ENSG00000260971	AC119674.1	0.003379	0	0.000224	0	0	0
ENST00000585186	ENSG00000264271	RN7SL488P	0.002755	0	0	0	0	0
ENST00000448001	ENSG00000229639	LINC01758	0.010467	0	0	0	0	0
ENST00000458146	ENSG00000225598	AL606519.1	0.013585	0	0	0	0	0
ENST00000484933	ENSG00000267272	LINC01140	0.0078	0.000808	0	0	0	0
ENST00000645056	ENSG00000237505	PKN2-AS1	0.002493	0	0	0	0	0
ENST00000432395	ENSG00000231613	AC099568.1	0.01548	0	0	0	0	0
ENST00000434207	ENSG00000231992	AC092802.3	0.042153	0	0.018143	0	0	0
ENST00000422980	ENSG00000232878	DPYD-AS1	0.000148	0	0	0	0	0
ENST00000453347	ENSG00000228420	LINC01768	0.048212	0	0	0	0	0.006582
ENST00000421157	ENSG00000238198	AL357055.3	0.000654	0	0	0	0	0
ENST00000426237	ENSG00000235527	HIPK1-AS1	0.018573	0	0	0	0	0.008532
ENST00000610820	ENSG00000233396	LINC01719	0.045316	0	0	0	0	0
ENST00000366105	ENSG00000234222	LIX1L-AS1	0.092797	0.032517	0	0	0.013917	0
ENST00000447686	ENSG00000234222	LIX1L-AS1	0.017999	0	6.7e-05	0	6.2e-05	0.005312
ENST00000606757	ENSG00000237188	AC242426.2	0.025184	0	0	0	0	0.013807
ENST00000607839	ENSG00000272030	AL162258.2	0.107952	0	0	0	0	0
ENST00000607963	ENSG00000273110	AL162591.2	0.01157	0	0	0	0	0
ENST00000606343	ENSG00000272068	AL365181.2	0.184895	0.028389	0.007956	0.0292	0.003257	0.024399
ENST00000605886	ENSG00000272405	AL365181.3	0.860542	0.091977	0.122457	0.06461	0.061868	0.157858
ENST00000621242	ENSG00000188004	SNHG28	0.004497	0	0	0	0	0
ENST00000619303	ENSG00000276359	RF00017	0.01156	0	0	0	0	0
ENST00000607752	ENSG00000271917	AL357568.2	0.062277	0	0	0	0.006917	0
ENST00000429865	ENSG00000232995	AL592435.1	0.019275	0	0	0	0	0
ENST00000528019	ENSG00000232995	AL592435.1	0.091084	0	0	0	0	0
ENST00000363804	ENSG00000200674	RN7SKP160	0.083274	0.023412	0.007288	0.01015	0	0
ENST00000367638	ENSG00000213057	C1orf220	0.122545	0	0	0	0.061193	0
ENST00000424735	ENSG00000237457	LINC01351	0.067079	0.008056	0	0	0	0.020083
ENST00000645822	ENSG00000285280	AL390957.1	0.009662	0	0	0	0	0
ENST00000644504	ENSG00000285280	AL390957.1	0.006861	0	0	0	0	0
ENST00000457348	ENSG00000233791	LINC01136	0.003103	0	0	0	0	0
ENST00000634239	ENSG00000237074	AL596218.1	0.006889	0	0	0	0	0
ENST00000487977	ENSG00000203709	MIR29B2CHG	0.0014	0	0	0	0	0
ENST00000421147	ENSG00000228437	LINC02474	0.091706	0	0.043617	0	0	0
ENST00000652067	ENSG00000236230	AL356108.1	0.003498	0	0	0	0	0
ENST00000651771	ENSG00000234476	AC092811.1	0.007778	0	0	0	0	0
ENST00000453525	ENSG00000228548	ITPKB-AS1	0.076387	0	0	0	0	0.006761
ENST00000413347	ENSG00000230005	SNAP47-AS1	0.008443	0	0	0	0	0
ENST00000602778	ENSG00000270110	AL353593.3	0.005775	0	0	0	0	0
ENST00000417605	ENSG00000223635	AL121990.1	0.013332	0	0	0	0	0
ENST00000440665	ENSG00000233461	AL445524.1	0.965663	0	0.290752	0.048365	0	0
ENST00000412483	ENSG00000233332	AL122008.3	0.004539	0	0	0	0	0
ENST00000642107	ENSG00000227630	LINC01132	0.099878	0	0	0	0	0
ENST00000458044	ENSG00000238005	AL391832.2	0.00871	0	0	0	0	0
ENST00000412098	ENSG00000229463	LYST-AS1	0.005468	0	0	0	0	0
ENST00000415358	ENSG00000228353	AL450322.1	0.015831	0	0	0	0	0
ENST00000649832	ENSG00000285520	AL353586.1	0.006074	0	0.000729	0	0	0
ENST00000420945	ENSG00000223834	AL161935.1	0.018322	0	0	0	0	0
ENST00000470244	ENSG00000244356	RN7SL398P	0.070156	0	0	0	0.001643	0.03299
ENST00000450287	ENSG00000224812	TMEM72-AS1	0.002043	0	0	0	0	0.001147
ENST00000443374	ENSG00000226200	SGMS1-AS1	0.099623	0	0	0	0	0
ENST00000343087	ENSG00000223502	AL731537.1	0.03151	0	0	0	0	0
ENST00000420193	ENSG00000236671	PRKG1-AS1	0.007814	0	0	0	0	0
ENST00000608678	ENSG00000228065	LINC01515	0.086578	0	0	0	0.004907	0
ENST00000480997	ENSG00000239942	RN7SL394P	0.027077	0	0	0	0	0
ENST00000422963	ENSG00000225299	AL139240.1	0.001976	0	0	0	0	0
ENST00000605385	ENSG00000282915	AC091769.2	0.022457	0	0	0	0	0.006431
ENST00000427492	ENSG00000233144	AL512656.1	0.005764	0	0	0	0	0
ENST00000416398	ENSG00000226051	ZNF503-AS1	0.004236	0	0	0	0	0
ENST00000448729	ENSG00000230091	TMEM254-AS1	0.000479	0	0	0	0	0
ENST00000608826	ENSG00000272631	AC067750.1	0.122042	0.002954	0.001922	0.00157	0.054137	0.002403
ENST00000454709	ENSG00000237280	AL136982.3	0.055618	0	0	0	0.007626	0.001715
ENST00000416301	ENSG00000226688	ENTPD1-AS1	0.002014	0	0	0	0	0
ENST00000608396	ENSG00000235823	OLMALINC	0.032628	0	0	0.007312	0	0
ENST00000641799	ENSG00000235823	OLMALINC	0.028407	0	0	0	0	0
ENST00000609691	ENSG00000273108	AL121929.2	0.011005	0	0	0	0	0
ENST00000581152	ENSG00000266754	RN7SL524P	0.012957	0.003698	0.002279	0	0	0
ENST00000648389	ENSG00000285676	AL158212.5	0.090685	0	0.003602	0	0	0.01033
ENST00000411666	ENSG00000232139	LINC00867	0.036572	0.019789	0	0	0	0
ENST00000618971	ENSG00000276742	AL731566.2	0.037781	6.2e-05	0	0.000176	0	0
ENST00000449984	ENSG00000226899	AL731577.1	0.004073	0	0	0	0	0
ENST00000607448	ENSG00000230724	LINC01001	0.011027	0	0	0	0	0
ENST00000527285	ENSG00000254966	AC103974.1	0.02223	0	0	0	0.012006	0
ENST00000511073	ENSG00000249867	AC090833.1	0.008524	0	0.002915	0.001428	0	0
ENST00000530389	ENSG00000255029	AC110058.1	0.004292	0	0	0	0	0
ENST00000528869	ENSG00000255443	CD44-AS1	0.069868	0	0.000218	0.023599	0	5.6e-05
ENST00000531966	ENSG00000255060	AC009656.1	0.021146	0	0	0	0	0
ENST00000534594	ENSG00000255256	AL136146.2	0.01595	0	0	0	0	0.002521
ENST00000501541	ENSG00000244953	AC087521.1	0.010644	0.000909	0	0	0	0
ENST00000537170	ENSG00000256824	AP000721.2	0.002222	0	0	0	0	0
ENST00000433606	ENSG00000237410	AP001092.1	0.013522	0	0	0	0	0
ENST00000610851	ENSG00000251562	MALAT1	0.006824	0.000488	0	0.002465	0.000521	0
ENST00000531155	ENSG00000255404	AP001266.1	0.007547	0	0	0	0	0
ENST00000531086	ENSG00000255320	AP000759.1	0.059258	0	0.015154	0	0.006808	0
ENST00000533502	ENSG00000255517	AP002748.3	0.044349	0	0	0	0	0
ENST00000445532	ENSG00000227726	AP001271.1	0.069341	0	0	0	0	0.028192
ENST00000526017	ENSG00000255539	AP002336.3	0.006584	0	0	0	0	0
ENST00000650022	ENSG00000285864	AP000593.4	0.066223	0	0	0	0	0
ENST00000542022	ENSG00000256007	ARAP1-AS1	0.000878	0	0	0	0	0
ENST00000534168	ENSG00000254420	AP003086.2	0.003092	0	0	0	0	0
ENST00000527030	ENSG00000254649	AP003086.3	0.005613	0	0	0	0	0
ENST00000526741	ENSG00000254563	AP002768.1	0.018871	0	0	0	0	0
ENST00000530261	ENSG00000246174	KCTD21-AS1	0.005959	0	0	0	0	0
ENST00000527550	ENSG00000254698	AP000893.2	0.018853	0	0	0	0	0
ENST00000648581	ENSG00000255666	AP000943.2	0.018108	0.003749	0	0	0	0
ENST00000411337	ENSG00000223269	RN7SKP53	0.035853	0	0.013564	0	0	0
ENST00000528717	ENSG00000255337	AP001830.1	2e-06	0	0	0	0	0
ENST00000561652	ENSG00000260966	AP001486.2	0.048907	0.000103	0.00013	0.008825	0.010724	0.000171
ENST00000529841	ENSG00000254990	AP001781.1	0.039447	0.010485	0	0	0	0
ENST00000526487	ENSG00000255129	AP000880.1	0.019693	0	0	0	0	0
ENST00000602598	ENSG00000269944	AP001267.4	0.05783	0	0	0	0	0
ENST00000532579	ENSG00000250073	AP000866.2	0.032521	0	0	0	0	0
ENST00000531241	ENSG00000255045	AP000866.5	0.021165	0	0	0	0.000472	0.000687
ENST00000548204	ENSG00000257271	KIRREL3-AS1	0.006723	0	0	0	0	0
ENST00000526269	ENSG00000254703	SENCR	0.102513	0	0	0	0	0
ENST00000525716	ENSG00000255455	AP003486.1	0.296078	0.014527	0.049108	0.038681	0.028865	0.029496
ENST00000602310	ENSG00000175773	AP002986.1	0.038912	0.02054	0	0	0	0
ENST00000616197	ENSG00000175773	AP002986.1	0.013058	0	0	0	0	0
ENST00000537295	ENSG00000256540	AC007406.3	0.007412	0	0	0	0	0
ENST00000650086	ENSG00000285627	AC005343.1	0.000378	0	0	0	3e-06	0
ENST00000542680	ENSG00000256721	CACNA1C-IT3	0.004729	0	0	0	0	0
ENST00000620330	ENSG00000278469	RF00017	0.08163	0.004349	0	0.036437	0	0
ENST00000602431	ENSG00000269892	AC125494.2	0.063882	0	0	0	0	0.029827
ENST00000499202	ENSG00000245667	AC006064.1	0.008864	0	0	0	0	0
ENST00000541775	ENSG00000205885	C1RL-AS1	0.039464	4.8e-05	0.004207	0	0.003601	0.002343
ENST00000618256	ENSG00000275367	AC092111.1	0.007039	0	0	0	0	0
ENST00000544461	ENSG00000226091	LINC00937	0.006519	0	0	0	0	0.002707
ENST00000536560	ENSG00000226091	LINC00937	0.021965	0	0	0	0	0
ENST00000545158	ENSG00000256011	AC007688.2	0.030605	0	0	0	0	0
ENST00000527705	ENSG00000180861	LINC01559	0.067874	0.008513	0	0	0	0
ENST00000444324	ENSG00000256339	AC007655.1	0.006768	0	0	0	0	0
ENST00000545729	ENSG00000246695	RASSF8-AS1	0.005802	0	0	0	0	0
ENST00000621404	ENSG00000278095	AC022509.4	0.046927	0.014546	0	0	0	0
ENST00000538113	ENSG00000257042	AC008011.2	0.000352	0	0	0	0	0
ENST00000538640	ENSG00000256504	AC009509.2	0.007285	0	0	0	0	0
ENST00000607353	ENSG00000272369	AC008035.1	0.093932	0.008048	0	0.008978	0	0.006949
ENST00000547748	ENSG00000257925	AC008083.1	0.004374	0	0	0	0	0
ENST00000622792	ENSG00000277173	AC004241.4	0.028141	0	0.00763	0	0	0
ENST00000562343	ENSG00000261586	AC068987.4	0.053598	0	0.008162	0	0	0
ENST00000549788	ENSG00000257830	AC021066.1	0.043842	0	0.008845	0	0	0
ENST00000549830	ENSG00000258279	LINC00592	0.022642	0	0	0	0	0
ENST00000640420	ENSG00000258279	LINC00592	0.006566	0	0	0	0	0
ENST00000439545	ENSG00000228630	HOTAIR	0.034218	0	0	0	0	0
ENST00000551732	ENSG00000257534	AC023794.5	0.002641	0	0	0	0	0
ENST00000548347	ENSG00000257550	AC023509.2	0.076476	0	0.021936	0	0	0
ENST00000553249	ENSG00000258045	RF00017	0.001078	0	0	0	0	0
ENST00000550947	ENSG00000258317	AC034102.6	0.019012	0.002875	0	0	0.005001	0
ENST00000504038	ENSG00000197301	HMGA2-AS1	0.008065	0	0	0	0	0
ENST00000535917	ENSG00000257083	AC073530.1	0.019684	0	0.004959	0.005757	0	0
ENST00000501387	ENSG00000247131	AC025263.1	0.010175	0	0	0	0	0
ENST00000549905	ENSG00000251138	AC090502.1	0.025026	0	0	0	0	0
ENST00000553163	ENSG00000258343	AC090001.1	0.003046	0	0	0	0	0
ENST00000550886	ENSG00000257696	AC010203.2	0.018805	0	0	0	0	0
ENST00000547027	ENSG00000257514	AC117505.1	0.01013	0	0	0	0	0
ENST00000552415	ENSG00000257918	AC079385.3	0.001753	0	0	0	0	0
ENST00000609228	ENSG00000234608	MAPKAPK5-AS1	0.059469	0	0	0	0	0
ENST00000550206	ENSG00000257359	AC073863.1	0.003272	0	0	0	0	0
ENST00000617795	ENSG00000274554	AC083806.2	0.00599	0.000113	7.4e-05	2.2e-05	0.001989	4.1e-05
ENST00000616576	ENSG00000255856	AC069503.1	0.08583	0	0.01331	0	0	0.014139
ENST00000637921	ENSG00000283389	RF00017	0.000754	0	0	0	0	0
ENST00000534849	ENSG00000275212	AC005186.1	0.008901	0	0	0	0	0
ENST00000543317	ENSG00000256943	AC148477.3	0.032654	0	0	0.014484	0	0
ENST00000576696	ENSG00000232977	LINC00327	0.018928	0	0	0	0	0.007756
ENST00000445227	ENSG00000230490	AL139383.1	0.039017	0	0	0	0	0
ENST00000454060	ENSG00000223685	LINC00571	0.013403	0	0	0.003115	0	0
ENST00000616706	ENSG00000215483	LINC00598	0.015018	0	0	0	0	0.004708
ENST00000432331	ENSG00000226519	LINC00390	0.020085	0	0	0	0	0
ENST00000606243	ENSG00000235903	CPB2-AS1	0.017463	0	0	0	0	0
ENST00000456688	ENSG00000231856	AL162377.1	0.047503	0	0	0	0	0
ENST00000484133	ENSG00000243900	RN7SL320P	0.007212	0	0	0	0	0
ENST00000634535	ENSG00000282997	AL162456.1	0.003928	0	0.001931	0.000278	0	0
ENST00000535893	ENSG00000257096	AL161747.2	0.026196	0	0	0	0	0
ENST00000622438	ENSG00000273618	AL135999.2	0.017697	0	0	0	0	0
ENST00000555109	ENSG00000258744	AL132800.1	0.016444	0	0.004869	0	0	0
ENST00000652140	ENSG00000258028	AL135878.1	0.005467	0	0	0	0	0
ENST00000552511	ENSG00000257636	G2E3-AS1	0.023015	0	0	0	0	0
ENST00000614852	ENSG00000278746	RN7SL660P	0.010629	0	0	0	0	0
ENST00000650718	ENSG00000259070	LINC00639	0.024249	0	0	0	0	0
ENST00000557197	ENSG00000258526	AL049828.1	0.02759	0	0	0	0	0
ENST00000555157	ENSG00000258949	AL049870.3	0.004377	0	0	0	0	0
ENST00000554810	ENSG00000258616	LINC02303	0.036511	0	0	0	0	0
ENST00000603474	ENSG00000214900	LINC01588	0.005595	0	0	0	0	0
ENST00000553463	ENSG00000214900	LINC01588	0.00617	0	0	0	0	0
ENST00000553914	ENSG00000214900	LINC01588	0.034813	0	0	0	0	0
ENST00000554129	ENSG00000214900	LINC01588	0.034343	0	0	0	0.008999	0.004856
ENST00000648102	ENSG00000285774	AL133444.1	0.010051	0	0	0	0	0
ENST00000555924	ENSG00000258428	AL161757.2	0.005376	0	0	0	0	0
ENST00000554458	ENSG00000258784	AL355773.1	0.005665	0	0	0	0	0
ENST00000555736	ENSG00000258760	AL355076.2	0.03521	0.008567	0	0	0	0
ENST00000556127	ENSG00000259118	AL139022.1	0.008106	0	0	0	0	0
ENST00000553682	ENSG00000258689	LINC01269	0.012867	0	0.006009	0	0	0
ENST00000558267	ENSG00000259319	AF111167.2	0.076333	0	0.015503	0	0	0
ENST00000649987	ENSG00000259103	AF107885.2	0.006528	0	0	0	0	0
ENST00000556368	ENSG00000259081	AF111169.3	0.018158	0	0	0	0	0
ENST00000553758	ENSG00000258610	AF111169.1	0.025167	0	0	0	0	0
ENST00000556271	ENSG00000258569	AC007376.2	0.014837	0	0.005689	0	0	0
ENST00000556458	ENSG00000258504	AL157871.1	0.000714	0	0	0	0	0
ENST00000560994	ENSG00000256802	AC022613.1	0.538742	0.049244	0	0.105267	0	0
ENST00000621501	ENSG00000277637	RN7SL469P	0.003602	0	0	0	0	0
ENST00000563217	ENSG00000261183	SPINT1-AS1	0.020028	0	0	0	0	0
ENST00000607504	ENSG00000260814	AC073657.1	0.011636	0	0	0	0	0
ENST00000564168	ENSG00000259883	EHD4-AS1	0.023913	0	0.00845	0	0	0
ENST00000558047	ENSG00000259595	AC025043.1	0.001135	0	0	0	0	0
ENST00000560324	ENSG00000259418	AC091117.2	0.008672	0	0	0	0	0
ENST00000560034	ENSG00000259519	AC051619.4	0.004407	0	0	0	0	0
ENST00000558536	ENSG00000259354	AC025580.2	0.075053	0.013441	0	0	0	0
ENST00000560077	ENSG00000259354	AC025580.2	0.035975	0.010393	0	0	0	0.002049
ENST00000469282	ENSG00000243027	RN7SL354P	0.040201	0	0	0	0	0
ENST00000621102	ENSG00000274954	AC090971.5	0.167716	0.016471	0.031692	0.020582	0	0.019796
ENST00000561934	ENSG00000261823	AC084782.2	0.010919	0	0	0	0	0.000976
ENST00000620766	ENSG00000247982	LINC00926	0.006825	0	0.002981	0	0	0
ENST00000559824	ENSG00000245534	RORA-AS1	1e-06	0	0	0	0	0
ENST00000558140	ENSG00000245534	RORA-AS1	0.008543	0	0	0	0	0
ENST00000560067	ENSG00000259248	USP3-AS1	0.0151	0	0	0	0	0
ENST00000560622	ENSG00000259248	USP3-AS1	0.036808	0	0	0	0	0
ENST00000560238	ENSG00000259672	AC087612.1	0.008764	0	0	0	0	0
ENST00000560387	ENSG00000259635	AC100830.1	0.024485	0	0	0	0	0.008238
ENST00000567396	ENSG00000261544	AC011939.2	0.07677	0	0	0.016289	0.020041	0
ENST00000612806	ENSG00000274995	AC013564.1	0.011145	0	0	0	0	0
ENST00000617013	ENSG00000277152	AC110048.2	0.09079	0.005689	0.002543	0.005425	0.008582	0.025671
ENST00000562130	ENSG00000261801	LOXL1-AS1	0.074421	0	0	0.00822	0.029121	0
ENST00000567257	ENSG00000261801	LOXL1-AS1	0.995104	0.042126	0.030992	0	0.019335	0
ENST00000563727	ENSG00000248540	AC010931.2	0.002596	0	0	0	0	0
ENST00000316148	ENSG00000177699	AC011944.1	0.003968	0	0	0	0	0
ENST00000561295	ENSG00000259649	AC027808.2	0.005645	0	0	0	0	0
ENST00000558261	ENSG00000259649	AC027808.2	0.005366	0	0	0	0	0
ENST00000491561	ENSG00000240470	RN7SL346P	0.051636	0.003585	0	0	0	0.004904
ENST00000610689	ENSG00000275345	AC091167.5	0.408913	0.022161	0.024553	0.029794	0.022613	0.048004
ENST00000554530	ENSG00000258476	LINC02207	0.006606	0	0	0	0	0
ENST00000500496	ENSG00000245479	LINC01585	0.006084	0	0	0	0	0
ENST00000557804	ENSG00000214432	VPS33B-DT	0.002833	0	0	0	0	0
ENST00000560068	ENSG00000259583	AC015712.2	0.101725	0.046522	0	0	0	0
ENST00000455294	ENSG00000228201	AL022341.1	0.004052	0	0	0	0.001499	0
ENST00000570247	ENSG00000260541	AL031722.1	0.014405	0	0	0	0	0
ENST00000561544	ENSG00000261532	AC009065.7	0.580455	0	0	0	0	0
ENST00000562838	ENSG00000260778	AC009065.4	0.046357	0	0	0	0.00034	0.01302
ENST00000569852	ENSG00000269937	AC093525.7	0.059976	0.001893	0.013543	0.010655	0.004697	0.003504
ENST00000573260	ENSG00000262482	AC004034.1	0.011028	0	0	0	0	0
ENST00000576590	ENSG00000263072	ZNF213-AS1	0.124157	0.00946	0	0.032855	0.004534	0.014489
ENST00000573878	ENSG00000261971	MMP25-AS1	0.011135	0	0	0	0	0
ENST00000570949	ENSG00000261971	MMP25-AS1	0.000937	0	0	0	0	0
ENST00000572574	ENSG00000261971	MMP25-AS1	0.454398	0	0.095999	0	0	0
ENST00000573130	ENSG00000261971	MMP25-AS1	0.107487	0.000853	0.005774	0.016402	0.002557	0.001243
ENST00000613210	ENSG00000262312	AC004494.1	0.005679	0	0.003079	0	0	0
ENST00000576080	ENSG00000262686	GLIS2-AS1	0.026812	0	0	0	0.012034	0
ENST00000632058	ENSG00000267072	NAGPA-AS1	0.002405	0	0	0	0	0
ENST00000475032	ENSG00000243954	RN7SL743P	0.068394	0	0	0	0	0
ENST00000564919	ENSG00000259939	AC022167.1	5.6e-05	0	1.9e-05	0	0	0
ENST00000569490	ENSG00000261394	AC007598.2	0.014618	0	0	0	0	0
ENST00000570581	ENSG00000262529	AC130650.1	0.017606	0	0	0	0	0
ENST00000647822	ENSG00000263257	AC040173.1	0.011728	0	0.00496	0	0	0
ENST00000562802	ENSG00000261216	AC007216.2	0.000684	0	0	0	0	0
ENST00000615574	ENSG00000262117	BCAR4	0.015644	0.001667	0	0.003302	0	0
ENST00000574364	ENSG00000263307	AC007216.4	0.002972	0	0.000879	0	0	0
ENST00000565802	ENSG00000261357	AC099518.2	0.022385	0	0	0	0	0
ENST00000568506	ENSG00000261416	AC012645.3	0.003493	0	0	0	0	0
ENST00000563540	ENSG00000260167	AC093249.2	0.03581	0	0	0	0	0.020239
ENST00000566900	ENSG00000261122	LINC02167	0.050091	0	0.007178	0	0	0.006472
ENST00000563994	ENSG00000261267	AC026470.3	0.006946	0	0	0	0	0
ENST00000563879	ENSG00000261049	AC007347.1	0.012028	0	0	0	0	0
ENST00000563090	ENSG00000260621	AC092140.1	0.010326	0	0	0	0	0
ENST00000562970	ENSG00000260145	AC023825.2	0.014305	0.000676	0	0	0	0
ENST00000569736	ENSG00000261742	LINC00922	0.006352	0	0	0	0	0
ENST00000635000	ENSG00000270049	AC009061.2	0.016577	0.001594	0	0	0	0
ENST00000605277	ENSG00000261386	AC027682.4	0.025273	0.000235	0	0.000289	0.000304	0.000519
ENST00000612545	ENSG00000275383	AC126773.4	0.005179	0	0	0	0	0
ENST00000563916	ENSG00000260798	AC099314.1	0.076688	0	0	0	0	0
ENST00000574178	ENSG00000262890	AC027281.1	0.002911	0	0	0	0	0
ENST00000563557	ENSG00000260612	AC009097.3	0.018731	0.008173	0	0	0	0
ENST00000563347	ENSG00000261673	AC009075.1	0.016483	0	0	0	0	0
ENST00000563770	ENSG00000261008	LINC01572	0.006381	0	0	0	0	0
ENST00000620814	ENSG00000259209	AC004943.1	0.02639	0	0	0	0	0
ENST00000606707	ENSG00000272330	AC002044.1	0.00399	0	0	0	0	0
ENST00000563098	ENSG00000261058	AC099508.2	0.001539	0	0	0	0	0
ENST00000568140	ENSG00000259999	AC009054.1	0.041599	0	0	0	0.003604	0
ENST00000611726	ENSG00000276523	AC025287.3	0.051952	0	0	0	0	0.019623
ENST00000562685	ENSG00000260511	AC009145.2	0.002508	0	0	0	0	0
ENST00000562450	ENSG00000261141	AC092718.5	0.013243	0	0	0	0	0.005526
ENST00000568771	ENSG00000261243	AC022165.1	0.028116	0	0.009581	0	0	0
ENST00000595705	ENSG00000269826	AC092327.2	0.004756	0	0	0	0	0
ENST00000602706	ENSG00000270184	AC018695.4	0.005718	0	0	0	0	0
ENST00000569872	ENSG00000261697	AC010531.4	0.030003	0	0.002751	0	0.006088	0
ENST00000562705	ENSG00000261327	AC134312.5	0.00324	0	0	0	0	0
ENST00000565008	ENSG00000180422	LINC00304	0.00527	0	0	0	0	0
ENST00000563087	ENSG00000260279	AC137932.1	0.119697	0.020159	0	0	0	0
ENST00000569162	ENSG00000260923	LINC02193	0.031693	0	0	0	0	0
ENST00000565635	ENSG00000260923	LINC02193	0.016566	0	0	0	0	0
ENST00000570809	ENSG00000262228	AC087392.3	0.163753	0.018869	0.036258	0.008871	0.023515	0.002782
ENST00000610106	ENSG00000186594	MIR22HG	0.055709	0	0	0	0	0
ENST00000575985	ENSG00000262678	AC004771.5	0.026913	0	0	0	0	0
ENST00000575889	ENSG00000215067	ALOX12-AS1	0.005963	0	0	0	0	0
ENST00000574377	ENSG00000215067	ALOX12-AS1	0.149852	0	0	1.1e-05	0	0.003934
ENST00000583963	ENSG00000265749	AC135178.3	0.020344	0	0	0	0	0
ENST00000584683	ENSG00000266378	AC005224.3	0.044171	0.003098	0.003221	0	0.001798	0.004594
ENST00000436469	ENSG00000230647	AC022816.1	0.029554	0	0	0	0.013051	0
ENST00000419151	ENSG00000230969	LINC02090	0.016886	0	0	0	0	0
ENST00000543475	ENSG00000226746	SMCR5	0.002771	0	0	0	0	0
ENST00000583643	ENSG00000265801	AC069366.2	0.014415	0	0	0	0	0
ENST00000581901	ENSG00000266527	AC005697.2	0.003477	0	0	0	0	0
ENST00000580782	ENSG00000265845	AC024267.4	0.009982	0	0	0	0.002202	0
ENST00000581474	ENSG00000264031	ABHD15-AS1	0.00128	0	0	0	0	0
ENST00000581019	ENSG00000263603	AC127024.2	0.018838	0	0	0	0	0.003572
ENST00000584721	ENSG00000266385	AC005899.5	0.021411	0	0	0	0	0
ENST00000584815	ENSG00000263674	AC026620.1	0.003303	0	0	0	0	0
ENST00000577227	ENSG00000265337	AC079336.3	0.000829	0	0	0	0	0
ENST00000650181	ENSG00000266718	AC079336.5	0.008036	0	0	0	0	0.004077
ENST00000615709	ENSG00000270240	AC015849.1	0.02653	0	0.011604	0	0	0
ENST00000619606	ENSG00000278638	AC244093.5	0.003329	0	0	0	0	0
ENST00000649665	ENSG00000264589	MAPT-AS1	0.002865	0	0	0	0	0
ENST00000584276	ENSG00000266601	AC018521.6	0.107341	0	0.001615	0	0	0.026469
ENST00000433510	ENSG00000272763	AC103702.2	0.012408	0	0	0	0	0
ENST00000647923	ENSG00000250310	AC006487.2	0.005815	0	0	0	0	0
ENST00000503624	ENSG00000250310	AC006487.2	0.006213	0	0	0	0	0
ENST00000511361	ENSG00000250282	AC002401.2	0.016824	0	0	0	0	0
ENST00000508851	ENSG00000251179	TMEM92-AS1	0.061926	0.004068	0	0.000117	0.008022	0.02301
ENST00000576014	ENSG00000263089	AC007114.2	0.003681	0	0	0	0	0
ENST00000580960	ENSG00000265542	AC015845.2	0.007913	0	0	0	0	0
ENST00000578022	ENSG00000264672	SEPT4-AS1	0.011485	0	0	0	0	0
ENST00000613789	ENSG00000275680	RF00017	0.023949	0	0	0	0	0
ENST00000592377	ENSG00000267280	TBX2-AS1	0.025357	0.01019	0	0	0.002068	0.001918
ENST00000584542	ENSG00000265000	AC068512.1	0.004351	0	0	0	0	0
ENST00000577544	ENSG00000264754	AC110921.1	0.034522	0.008507	0	0	0	0
ENST00000591334	ENSG00000227517	LINC01483	0.019067	0	0	0	0	0.00549
ENST00000590137	ENSG00000267128	RNF157-AS1	0.00407	0	0	0	0	0
ENST00000607478	ENSG00000272386	AC015802.5	0.005069	0	0	0	0	0
ENST00000607136	ENSG00000267546	AC015802.4	0.014646	0	0	0	0	0
ENST00000586321	ENSG00000267737	AC087645.2	0.020738	0	0	0	0	0
ENST00000586185	ENSG00000267123	SCAT1	0.013172	0.005687	0	0	0	0
ENST00000570413	ENSG00000263167	AC115099.1	0.024525	0	0	0	0	0
ENST00000415556	ENSG00000235296	AC145207.1	0.015106	0	0.007242	0	0	0
ENST00000585072	ENSG00000263745	AP005230.1	0.005837	0	0	0	0	0
ENST00000580007	ENSG00000265490	AP001178.2	0.007368	0	0	0	0	0
ENST00000583314	ENSG00000266171	AP001020.3	0.002247	7e-05	9.7e-05	0.000419	0.000183	0.000304
ENST00000577439	ENSG00000263753	LINC00667	0.106248	0	0	0	0	0
ENST00000581571	ENSG00000265933	LINC00668	0.008625	0	0	0	0	0
ENST00000583840	ENSG00000265933	LINC00668	0.001165	0	0	0	0	0
ENST00000580491	ENSG00000266149	AP001094.3	0.004731	0	0	0	0	0
ENST00000582375	ENSG00000266053	NDUFV2-AS1	0.008398	0.001137	0	0	0.002702	0
ENST00000586591	ENSG00000267199	AP001029.2	0.018113	0	0	0	0	0
ENST00000610087	ENSG00000272746	AP005131.7	0.025792	0	0	0	0	0
ENST00000582962	ENSG00000265786	LINC01906	0.0236	0	0.005823	0	0	0
ENST00000608010	ENSG00000273321	AC023983.2	0.01402	0	0	0	0	0.00035
ENST00000583706	ENSG00000264859	DSG2-AS1	0.003893	0	0	0	0	0
ENST00000596954	ENSG00000268873	AC022601.1	0.002458	0	0	0	0	0
ENST00000619893	ENSG00000274400	AC015967.1	0.098437	0	0	0	0.010728	0.035248
ENST00000600644	ENSG00000267313	AC021504.1	0.008785	0	0	0	0	0
ENST00000592302	ENSG00000267313	AC021504.1	0.034915	0	0.001003	0	0	0
ENST00000410247	ENSG00000222179	RN7SKP26	0.034063	0	0	0	0	0
ENST00000590797	ENSG00000267391	MIR122HG	0.001743	0	0	0	0	0
ENST00000585691	ENSG00000267462	AC090377.1	0.017828	0	0	0	0	0
ENST00000586675	ENSG00000267304	AC004637.1	0.011381	0	0	0	0	0
ENST00000594776	ENSG00000269807	AC007292.3	0.027871	0	0.013506	0	9.8e-05	0
ENST00000586721	ENSG00000176840	MIR7-3HG	0.017181	0	0	0	0	0
ENST00000615487	ENSG00000275234	AC010503.4	0.001794	0	0	0	0	0
ENST00000614781	ENSG00000276980	AC008760.2	0.002768	0	0	0	0	0
ENST00000601797	ENSG00000268204	AC008763.1	0.069657	0	0	0.012405	0	0.011662
ENST00000586630	ENSG00000267417	AC138474.1	0.006492	0	0	0	0	0
ENST00000587693	ENSG00000267373	AC008894.1	0.013284	0	0	0	0	0
ENST00000601687	ENSG00000269427	AC024075.3	0.015285	0.005327	0	0	0	0
ENST00000593957	ENSG00000269481	AC010319.4	0.062329	0.012041	0.011567	0	0	0
ENST00000635435	ENSG00000282851	BISPR	0.038129	0	0	0	0	0.008845
ENST00000599078	ENSG00000268658	LINC00664	0.004136	0	0	0	0	0
ENST00000600223	ENSG00000267886	AC074135.1	0.20245	0	0	0	0.075165	0
ENST00000652517	ENSG00000286157	AC011467.7	0.01479	0	0	0	0.003832	0
ENST00000585336	ENSG00000267662	AC025809.1	0.014158	0.000656	0	0	0	0
ENST00000599404	ENSG00000268683	AC020910.1	0.017271	0	0	0	0	0
ENST00000592518	ENSG00000267786	AF038458.3	0.06369	0	0	0	0	0
ENST00000587412	ENSG00000267388	AF038458.2	0.039397	0	0	0	0	0
ENST00000588717	ENSG00000267353	AC020928.3	0.001793	0	0	0	0	0
ENST00000433232	ENSG00000225975	LINC01534	0.095808	0	0	0.044233	0	0
ENST00000612804	ENSG00000267605	AC016590.1	0.003421	0	0	0	0	0
ENST00000588040	ENSG00000267152	AC093227.1	0.276026	0	0	0	0	0
ENST00000601752	ENSG00000268051	AC008395.1	0.126941	0.001736	0.016628	0.016734	0	0.015063
ENST00000602255	ENSG00000267892	AC022144.1	0.068986	0	0.014116	0.012024	0	0.006222
ENST00000601911	ENSG00000268262	AC011445.1	0.04171	0	0	0	0	0
ENST00000616866	ENSG00000277744	AC011462.5	0.374957	0	0.014147	0.097975	0.03155	0.068532
ENST00000597119	ENSG00000269177	L34079.2	0.00559	0	0	0.000937	0	0.001104
ENST00000586251	ENSG00000267395	DM1-AS	0.053661	0.001835	0	0	0	0
ENST00000601263	ENSG00000268621	IGFL2-AS1	0.041723	0.004237	0	0	0.016339	0
ENST00000595005	ENSG00000268518	AC020909.2	0.00638	0	0	0	0	0
ENST00000597355	ENSG00000269873	AC245884.10	0.079479	0	0.007015	0.001198	0.014012	0.019169
ENST00000593060	ENSG00000267265	AC011476.3	0.005025	0	0	0	0.001025	0.001551
ENST00000586845	ENSG00000267265	AC011476.3	0.058268	0	0.029134	0	0	0
ENST00000587920	ENSG00000267421	AC005498.2	0.140666	0.052122	0	0	0	0
ENST00000594562	ENSG00000268266	AC003005.2	0.032997	0	0	0	0	0
ENST00000579576	ENSG00000265272	RN7SL693P	0.0273	0	0	0	0	0
ENST00000454530	ENSG00000226649	AC019118.1	0.007454	0	0	0	0	0
ENST00000453900	ENSG00000235092	ID2-AS1	0.033952	0	0	0	0	0
ENST00000483023	ENSG00000244260	AC082651.4	0.021273	0	0	0	0	0
ENST00000424895	ENSG00000236204	LINC01376	0.011585	0	0	0	0	0
ENST00000634300	ENSG00000283031	AC009242.1	0.002902	0	0	0	0	0
ENST00000431376	ENSG00000230730	AC074011.1	0.025829	0	0	0	0	0
ENST00000445878	ENSG00000229951	AC104695.2	0.015475	0.001423	0	0	0	0.002061
ENST00000437680	ENSG00000237133	AC020594.1	0.090838	0	0.03118	0	0	0.012249
ENST00000413792	ENSG00000237803	LINC00211	0.023566	0	0	0	0	0
ENST00000593848	ENSG00000227028	SLC8A1-AS1	0.001663	0	0	0	0	0
ENST00000422013	ENSG00000224875	AC083949.1	0.014685	0	0	0	0	0
ENST00000409518	ENSG00000222005	LINC01118	0.082187	0	0	0	0	0
ENST00000468141	ENSG00000239332	LINC01119	0.070569	0	0.000759	0.012023	0	0
ENST00000447571	ENSG00000230773	AC092650.1	0.001331	0	0	0	0	0
ENST00000435357	ENSG00000225444	LINC01867	0.006175	0	0	0	0	0
ENST00000441598	ENSG00000228590	AC007381.1	0.015627	0.004637	0	0	0	0
ENST00000603652	ENSG00000270820	AC016727.1	0.058383	0	0	0	0	0
ENST00000578974	ENSG00000270820	AC016727.1	0.002392	0	0	0	0	0
ENST00000593336	ENSG00000235885	LINC01828	0.025721	0	0	0	0	0
ENST00000626583	ENSG00000235885	LINC01828	0.018583	0.009747	0	0	0	0
ENST00000598583	ENSG00000235885	LINC01828	0.053621	0	0	0	0	0
ENST00000629960	ENSG00000235885	LINC01828	0.034128	0	0	0	0	0
ENST00000608509	ENSG00000273245	AC092653.1	0.494228	0.017341	0.047956	0.044639	0	0.027771
ENST00000439192	ENSG00000237883	DGUOK-AS1	0.001308	0	0	0	0	0
ENST00000604464	ENSG00000270462	AC005034.2	0.018905	0	0	0	0	0
ENST00000469800	ENSG00000286011	AC062037.3	0.096754	0	0	0	0	0.017822
ENST00000453008	ENSG00000234028	EIF2AK3-DT	0.06152	0	0	0	0	0
ENST00000612724	ENSG00000222041	CYTOR	0.005682	0	0	0	0	0
ENST00000646578	ENSG00000222041	CYTOR	0.021099	0	0	0	0	0
ENST00000643070	ENSG00000222041	CYTOR	0.067403	0.001511	0.020866	0	0	0.005249
ENST00000620023	ENSG00000230606	AC092683.1	0.014406	0	0	0	0	0
ENST00000600957	ENSG00000230606	AC092683.1	0.000998	0.000466	0	0	0	0
ENST00000430893	ENSG00000230606	AC092683.1	0.009624	0	0	0	0	0
ENST00000419296	ENSG00000204588	LINC01123	0.015348	0.008415	0	0	0	0
ENST00000448359	ENSG00000175772	LINC01106	0.019466	0	0	0	0	0
ENST00000458252	ENSG00000231536	AC226101.1	0.025069	0	0	0	0	0.00658
ENST00000438897	ENSG00000229118	AC068491.2	0.009593	0.002293	0	0	0	0
ENST00000409569	ENSG00000172965	MIR4435-2HG	3.5954	0.507468	0.766165	0.042064	0.02782	0.366205
ENST00000457336	ENSG00000237753	AC079922.2	0.08941	0	0	0	0	0.020962
ENST00000420579	ENSG00000228857	AC104653.1	0.018506	0	0	0	0.003477	0
ENST00000627670	ENSG00000235066	AC009303.2	0.006016	0.000644	0	0	0	0
ENST00000413602	ENSG00000231013	AC013275.1	0.003903	0	0	0	0	0
ENST00000437330	ENSG00000229203	AC103564.1	0.033304	0	0	0	0	0
ENST00000419808	ENSG00000231890	DARS-AS1	4.5e-05	0	0	2e-05	0	0
ENST00000431985	ENSG00000228043	AC114763.1	0.030065	0.006054	0.00132	0	0	0.009397
ENST00000601578	ENSG00000226674	TEX41	0.007983	0	0	0	0	0
ENST00000634873	ENSG00000283118	AC009951.2	0.003543	0	0	0	0	0
ENST00000434635	ENSG00000224675	AC009227.1	0.08728	0.031075	0.002615	0	0	0.007179
ENST00000463588	ENSG00000243723	RN7SL393P	0.033363	0	0	0	0	0
ENST00000449526	ENSG00000228586	AC005042.2	0.011242	0	0	0	0	0.004626
ENST00000477514	ENSG00000285373	LINC02478	0.100257	0	0.00982	0	0	0.043714
ENST00000623667	ENSG00000234350	AC007405.1	0.006158	0	0	0	0	0
ENST00000426475	ENSG00000239467	AC007405.3	0.049228	0	0	0	0	0
ENST00000448117	ENSG00000236651	DLX2-DT	0.010533	0	0	0	0	0
ENST00000442996	ENSG00000236449	AC010894.3	0.002986	0	0	0	0	0
ENST00000412133	ENSG00000229941	AC012499.1	0.002268	0	0	0	0	0
ENST00000397057	ENSG00000213963	AC019080.1	0.109453	0.025418	0.008791	0.017822	0.000598	0.009341
ENST00000587576	ENSG00000237298	TTN-AS1	0.01231	0	0	0	0	0
ENST00000627564	ENSG00000237298	TTN-AS1	0.00221	0	0	0	0	0
ENST00000603521	ENSG00000270574	AC010680.2	0.003722	0	0	0	0	0
ENST00000415357	ENSG00000231689	LINC01090	0.002663	0	0	0	0	0
ENST00000516126	ENSG00000251935	RN7SKP179	0.033648	0	0	0.006265	0	0
ENST00000478343	ENSG00000240302	RN7SL717P	0.016714	0	0	0	0	0
ENST00000626311	ENSG00000226312	CFLAR-AS1	0.006544	0	0	0	0	0
ENST00000419860	ENSG00000237271	AC009498.1	0.007088	0	0	0	0	0
ENST00000422116	ENSG00000225610	AC007679.1	0.02753	0	0	0	0	0
ENST00000628368	ENSG00000280837	CPS1-IT1	0.013428	0	0	0	0.00455	0
ENST00000437883	ENSG00000197585	AC068051.1	0.007454	0.00097	0	0	0	0
ENST00000484635	ENSG00000231672	DIRC3	0.011938	0	0	0	0	0
ENST00000429343	ENSG00000235024	AC097468.2	0.002137	0	0	0	0	0
ENST00000442416	ENSG00000227308	AC009502.1	0.010477	0	0	0	0	0
ENST00000423838	ENSG00000235070	AC062015.1	0.043427	0	0.009455	0	0	0
ENST00000563949	ENSG00000261096	AC073476.3	0.134308	0.013276	0.025496	0.008343	0.009041	0.015646
ENST00000447488	ENSG00000237126	AC073254.1	0.036934	0	0	0	0	0
ENST00000582831	ENSG00000264676	RN7SL204P	0.030675	0	0	0	0	0
ENST00000414896	ENSG00000223374	AC005104.1	0.03272	0	0	0	0	0.007711
ENST00000429456	ENSG00000237940	LINC01238	0.008325	0	0	0	0	0
ENST00000417267	ENSG00000234793	AC114730.2	0.009787	0	0	0	0	0
ENST00000435195	ENSG00000235351	AC114730.3	0.016891	0	0	0	0.007547	0
ENST00000620919	ENSG00000276649	AL117335.1	0.015691	0	0.004056	0	0	0
ENST00000619200	ENSG00000276649	AL117335.1	7.8e-05	0	0	0	0	0
ENST00000419863	ENSG00000238282	AL121781.1	0.024701	0	0	0	0	0
ENST00000449270	ENSG00000243961	PARAL1	0.006323	0	0	0	0	0
ENST00000610812	ENSG00000277373	AL132765.2	0.026938	0	0	0	0	0
ENST00000454749	ENSG00000179935	LINC00652	0.016964	0	0.002376	0	0	0
ENST00000443753	ENSG00000232712	KIZ-AS1	0.001289	0	0	0	0	0
ENST00000610918	ENSG00000277901	AL390037.1	0.050658	0	0	0	0.003814	0
ENST00000376404	ENSG00000175170	FAM182B	0.017279	0	0	0	0	0
ENST00000582267	ENSG00000175170	FAM182B	0.018532	0	0.00202	0	0.00597	0
ENST00000584356	ENSG00000175170	FAM182B	0.023822	0	0	0	0	0
ENST00000611296	ENSG00000278276	AL110115.2	0.007314	0	0	0.001609	0	0
ENST00000620523	ENSG00000277301	AL034550.2	0.004449	0	0	0	0	0
ENST00000423074	ENSG00000230753	ZNF341-AS1	0.047887	0	0	0	0	0
ENST00000651340	ENSG00000234139	AL035420.1	0.00434	0	0	0	0	0
ENST00000441208	ENSG00000232406	AL121895.1	0.001459	0	0	0	0	0
ENST00000442482	ENSG00000226143	Z98752.1	0.039568	0	0	0	0	0.001202
ENST00000535913	ENSG00000204044	SLC12A5-AS1	0.008052	0	0	0	0	0
ENST00000650933	ENSG00000286159	AL035106.1	0.001205	0	0	0	0	0
ENST00000631314	ENSG00000235590	GNAS-AS1	0.085949	0	0	0	0	0
ENST00000478167	ENSG00000228812	LAMA5-AS1	0.003578	0	0	0	0	0
ENST00000412495	ENSG00000174403	MIR1-1HG-AS1	0.003423	0	0	0	0	0
ENST00000612722	ENSG00000275620	AL121827.2	0.001032	0	0	0	0	0
ENST00000624561	ENSG00000280191	LINC01669	0.060467	0	0	0	0	0
ENST00000624113	ENSG00000280191	LINC01669	0.006543	0	0	0	0	0
ENST00000623983	ENSG00000280095	CU639417.4	0.065152	0	0	0	0	0
ENST00000624847	ENSG00000278903	CU633906.2	0.014743	0	0	0.002771	0	0
ENST00000623506	ENSG00000275496	CU633906.1	0.017463	0.000337	0	0	0.004518	0.004154
ENST00000623095	ENSG00000277067	CU634019.1	2.55988	0.002924	0.003473	0.005757	0.016541	0.000636
ENST00000623409	ENSG00000278932	CR381653.1	0.025672	0	0	0	0	0
ENST00000418813	ENSG00000215386	MIR99AHG	0.002918	0	0	0	0	0
ENST00000602659	ENSG00000215386	MIR99AHG	0.000766	0	0	0	0	0
ENST00000437492	ENSG00000224141	MIR548XHG	0.03698	0	0.009884	0.011775	0	0
ENST00000429340	ENSG00000232692	AP001596.1	0.276178	0	0.074643	0	0	0.027148
ENST00000452460	ENSG00000232692	AP001596.1	0.037652	0	0	0	0.008147	0.007531
ENST00000419921	ENSG00000234380	LINC01426	0.020546	0	0	0	0	0
ENST00000433840	ENSG00000228120	AP001631.1	0.050105	0	0	0	5.5e-05	0.006811
ENST00000426942	ENSG00000185186	LINC00313	0.005667	0	0	0	0	0
ENST00000332440	ENSG00000185186	LINC00313	0.02956	0.014992	0	0	0	0
ENST00000451035	ENSG00000235890	TSPEAR-AS1	0.061824	0	0	0	0	0
ENST00000380008	ENSG00000205424	AL592528.1	0.00341	0	0	0	0	0
ENST00000446475	ENSG00000224574	COL18A1-AS2	0.001665	0	0	0	0	0
ENST00000626933	ENSG00000223901	AP001469.1	0.0037	0	0	0	0	0
ENST00000442403	ENSG00000237689	AC007064.2	0.018679	0.001508	0	0	0	0
ENST00000463821	ENSG00000244296	RN7SL168P	0.012615	0	0	0	0	0
ENST00000619837	ENSG00000277950	RF00017	0.046015	0	0	0	0.017629	0
ENST00000410420	ENSG00000222352	RN7SKP221	0.059514	0	0.002008	0	0	0
ENST00000491172	ENSG00000244425	RN7SL268P	0.025736	0	0	0	0	0
ENST00000366110	ENSG00000203280	AL022323.1	0.002772	0	0	0	0	0
ENST00000440477	ENSG00000227880	AL050402.1	0.008955	0	0	0	0	0
ENST00000419368	ENSG00000225465	RFPL1S	0.027647	0.006958	0	0	0	0
ENST00000651381	ENSG00000224271	AL117329.1	0.008929	0	0	0	0	0
ENST00000652702	ENSG00000224271	AL117329.1	0.007889	0	0	0	0	0
ENST00000652505	ENSG00000224271	AL117329.1	0.007439	0	0	0	0	0
ENST00000651754	ENSG00000224271	AL117329.1	0.003648	0	0	0	0	0
ENST00000650924	ENSG00000224271	AL117329.1	0.002902	0	0	0	0	0
ENST00000652690	ENSG00000224271	AL117329.1	0.003274	0	0	0	0	0
ENST00000651625	ENSG00000224271	AL117329.1	0.005194	0	0	0	0	0
ENST00000652500	ENSG00000270207	AC077690.1	0.005271	0	0	0	0	0
ENST00000522221	ENSG00000206573	THUMPD3-AS1	0.526925	0.002094	0.007485	0.078354	0.029691	0.033724
ENST00000628760	ENSG00000228242	AC093495.1	0.000234	0	0	0	0	0
ENST00000498222	ENSG00000241064	RN7SL110P	0.012807	0	0	0	0	0
ENST00000566804	ENSG00000261734	AC116096.1	0.001703	0	0	0	0	0
ENST00000413430	ENSG00000235904	RBMS3-AS3	0.002706	0	0	0	0	0
ENST00000447181	ENSG00000232490	OSBPL10-AS1	0.008088	0	0	0	0	0
ENST00000626444	ENSG00000232354	VIPR1-AS1	0.003992	0	0	0	0	0
ENST00000649466	ENSG00000285766	AC092042.4	0.011128	0	0	0	0	0
ENST00000427258	ENSG00000235845	AC098649.1	0.043554	0	0	0	0	0
ENST00000429315	ENSG00000227398	KIF9-AS1	0.001077	0	0	0	0	0
ENST00000421275	ENSG00000228350	LINC02585	0.009896	0.000833	0	0.00092	0	0.00124
ENST00000426302	ENSG00000230454	U73166.1	0.005429	0	0	0	0	0
ENST00000607121	ENSG00000271858	Z84492.1	0.07318	0	0	0	0	0
ENST00000607740	ENSG00000271916	AC012467.1	0.026162	0	0	0	0	0
ENST00000607297	ENSG00000272146	ARF4-AS1	1.3e-05	0	0	0	0	1e-06
ENST00000607592	ENSG00000272360	AC116036.2	0.230926	0.023293	0.013207	0.012415	0.018328	0.037797
ENST00000462717	ENSG00000243410	PSMD6-AS1	0.02387	0	0	0	0	0
ENST00000482677	ENSG00000241316	SUCLG2-AS1	0.02986	0	0	0	0	0
ENST00000599467	ENSG00000244513	AC109587.1	0.022891	0	0	0	0	0
ENST00000641053	ENSG00000240405	SAMMSON	0.005197	0	0	0	0	0
ENST00000462492	ENSG00000241163	LINC00877	0.031668	0	0	0	0	0
ENST00000615819	ENSG00000274387	AC097634.2	0.013045	0	0	0	0	0
ENST00000465215	ENSG00000214407	LINC02085	0.076713	0	0	0	0	0
ENST00000483840	ENSG00000241280	AC106712.1	0.067491	0	6.4e-05	4.2e-05	3.9e-05	0
ENST00000490324	ENSG00000249474	AC020651.1	0.036335	0	0	0	0	0
ENST00000470313	ENSG00000240057	AC078785.1	0.065937	0	0	0	0	0
ENST00000467342	ENSG00000240057	AC078785.1	0.022568	0	0	0	0	0
ENST00000462010	ENSG00000241219	AC078785.2	0.006288	0	0	0	0	0.003086
ENST00000608436	ENSG00000272678	AC112503.1	0.030765	0	0	0	0	0
ENST00000568966	ENSG00000260391	AC022336.2	0.017414	0.000629	0.000546	0.000358	0.001313	0.000597
ENST00000508263	ENSG00000248607	AC117422.1	0.019999	0	0	0	0	0
ENST00000650122	ENSG00000285600	AC023593.1	0.012836	0	0	0.003587	0	0
ENST00000649080	ENSG00000285619	AL449214.1	0.010447	0	0	0	0	0
ENST00000480095	ENSG00000244232	RN7SL698P	0.038788	0	0	0	0	0
ENST00000514145	ENSG00000249846	LINC02021	0.085179	0	0	0	0	0
ENST00000504737	ENSG00000250592	AC055733.2	0.000618	0	0	0	0	0
ENST00000513940	ENSG00000250129	AC116424.1	0.035306	0	0	0	0	0
ENST00000459861	ENSG00000240086	AC092969.1	0.162519	0	0	0	0	0.044131
ENST00000495287	ENSG00000244578	LINC01391	0.006577	0	0	0	0	0.002575
ENST00000513309	ENSG00000250433	CLSTN2-AS1	0.005852	0	0	0	0	0
ENST00000512622	ENSG00000248932	AC097103.2	0.042219	0	0	0	0	0
ENST00000362449	ENSG00000199319	RN7SKP25	0.066514	0	0	0	0.033842	0
ENST00000463167	ENSG00000241985	WWTR1-IT1	0.078815	0.007011	0.009474	0	0.004964	0.019716
ENST00000479626	ENSG00000240373	SEC62-AS1	0.016502	0.004729	0	0	0	0
ENST00000424690	ENSG00000226779	NAALADL2-AS2	0.003618	0	0	0	0	0
ENST00000446548	ENSG00000228221	LINC00578	0.005225	0	0	0	0	0
ENST00000642922	ENSG00000242808	SOX2-OT	0.015995	0	0	0	0	0
ENST00000628547	ENSG00000242086	MUC20-OT1	0.021538	0	0.000183	0.000251	0	0
ENST00000627363	ENSG00000242086	MUC20-OT1	0.015851	0	0	0	0	0
ENST00000626007	ENSG00000242086	MUC20-OT1	0.039806	0	0	0.0157	0	2e-05
ENST00000602127	ENSG00000242086	MUC20-OT1	0.136442	0	0	0	0	0
ENST00000420851	ENSG00000242086	MUC20-OT1	0.035714	0	0	0	0	0
ENST00000627562	ENSG00000242086	MUC20-OT1	0.000702	0	1.7e-05	0	0	0
ENST00000451228	ENSG00000242086	MUC20-OT1	0.037351	0	0	0	0	0
ENST00000430666	ENSG00000227375	DLG1-AS1	0.004473	0	0	0	0	0
ENST00000609548	ENSG00000273179	AC092535.4	0.019781	0	0	0	0	0
ENST00000514984	ENSG00000196810	CTBP1-DT	0.207197	0.005292	0.020023	0.022296	0	0.016306
ENST00000502636	ENSG00000250623	AL136360.2	0.008952	0	0	0	0	0
ENST00000507244	ENSG00000247708	STX18-AS1	0.042489	0	0	0	0	0
ENST00000505448	ENSG00000251615	AC104825.1	0.055455	0	0.013098	0.009656	0	0.003026
ENST00000503532	ENSG00000250634	LINC01182	0.033676	0	0	0	0	0.001426
ENST00000512370	ENSG00000248138	AC097515.1	6e-05	0	0	0	0	0
ENST00000511010	ENSG00000249502	AC006160.1	0.052222	0	0	0	0	0
ENST00000511431	ENSG00000248515	AC024230.1	0.004346	0	0	0	0	0
ENST00000499292	ENSG00000247193	AC104078.1	0.005442	0	0	0	0	0
ENST00000509449	ENSG00000249207	AC079921.1	0.002166	0	0	0	0	0
ENST00000595906	ENSG00000269506	AC110792.2	0.004882	0	0	0	0	0
ENST00000503987	ENSG00000250075	AC104806.2	0.005749	0	0	0	0	0
ENST00000502400	ENSG00000250075	AC104806.2	0.009669	0	0.000486	0	0.001154	0.000444
ENST00000650985	ENSG00000180769	WDFY3-AS2	0.063015	0	0	0	0	0.035866
ENST00000516948	ENSG00000252757	RN7SKP96	0.010966	0	0	0	0	0
ENST00000597259	ENSG00000285122	PIGY-DT	0.010755	0	0	0	6.5e-05	6.5e-05
ENST00000509984	ENSG00000234492	RPL34-AS1	0.008484	0.002267	0	0	0	0
ENST00000426240	ENSG00000228358	LINC02263	0.013265	0	0	0	0	0
ENST00000567343	ENSG00000260091	AC093752.3	0.010511	0	0	0	0	0
ENST00000505133	ENSG00000251432	LINC02615	0.026325	0	0	0	0	0
ENST00000608663	ENSG00000273247	AC097376.2	0.006581	0	0	0	0	0
ENST00000608345	ENSG00000273247	AC097376.2	0.053105	0	0	0	0	0
ENST00000609616	ENSG00000196951	SCOC-AS1	0.019086	0	0	0	0	0
ENST00000603643	ENSG00000270302	AC080078.1	0.049209	0	0	0	0	0
ENST00000508752	ENSG00000248429	FAM198B-AS1	0.008678	0	0	0	0	0
ENST00000517192	ENSG00000253001	RN7SKP105	0.012547	0	0	0	0	0
ENST00000511846	ENSG00000251128	WWC2-AS1	0.000975	0	0	0	0	0
ENST00000514884	ENSG00000250410	AC112722.1	0.017405	0	0	0	0	0
ENST00000607662	ENSG00000249159	AC091965.1	0.011215	0	0	0	0	0
ENST00000511310	ENSG00000248537	AC091906.1	0.003224	0	0	0	0	0
ENST00000510879	ENSG00000251370	SEMA5A-AS1	0.002346	0	0	0	0	0
ENST00000505196	ENSG00000248131	LINC01194	0.006951	0	0	0	0	0
ENST00000511821	ENSG00000248223	AC026785.2	0.03917	0.016555	0	0	0	0
ENST00000505158	ENSG00000250822	LINC02111	0.02155	0.002295	2.5e-05	0	0	0.008504
ENST00000523584	ENSG00000254138	AC113386.1	0.012766	0	0	0	0	0
ENST00000504609	ENSG00000249069	LINC01033	0.003157	0	0	0	0	0
ENST00000506106	ENSG00000250961	AC025470.2	0.002255	0	0	0	0	0
ENST00000510261	ENSG00000250081	AC025176.1	0.136997	0.000787	0.000745	0.025082	0.001116	0.000594
ENST00000514241	ENSG00000249057	MAST4-IT1	0.039756	0	0.012467	0	0.007229	0
ENST00000584555	ENSG00000266477	RN7SL616P	0.008787	0	0	0	0	0
ENST00000643472	ENSG00000285151	AC140134.2	0.002467	0.001303	0	0	0	0
ENST00000646820	ENSG00000285204	AC139834.1	0.002467	0.001303	0	0	0	0
ENST00000643894	ENSG00000250802	ZBED3-AS1	0.043042	0	0	0	0	0
ENST00000508401	ENSG00000250802	ZBED3-AS1	0.013382	0	0	0	0	0
ENST00000643819	ENSG00000250802	ZBED3-AS1	0.027081	0.00254	0	0	0	0
ENST00000645183	ENSG00000250802	ZBED3-AS1	0.00017	0	5.1e-05	0	0	0
ENST00000502041	ENSG00000247572	CKMT2-AS1	1.64306	0.00041	2.3e-05	0.000846	0	0.216781
ENST00000509406	ENSG00000250320	AC113383.1	0.036564	0	0	0	0	0
ENST00000515750	ENSG00000249061	AC109492.1	0.038497	0	0	0	0	0
ENST00000506978	ENSG00000245526	LINC00461	0.005961	0	0	0	0	0
ENST00000648457	ENSG00000248323	LUCAT1	0.012397	0.004227	0	0	0	0
ENST00000507813	ENSG00000250015	AC018752.1	0.021857	0	0	0	0	0
ENST00000507630	ENSG00000251456	AC113398.2	0.09169	0	0.010413	0	0	0.00969
ENST00000651821	ENSG00000286111	AC116362.2	0.001629	0	0	0	0	0
ENST00000450613	ENSG00000248752	AC116362.1	0.006818	0	0	0	0	0
ENST00000515808	ENSG00000250602	AC093535.1	0.005028	0	0	0	0	0
ENST00000424244	ENSG00000223548	AC034228.1	0.008537	0	0	0	0	0
ENST00000505663	ENSG00000249647	C5orf66-AS2	0.003866	0	0	0	0	0
ENST00000555344	ENSG00000249647	C5orf66-AS2	0.034096	0	0	0	0	0
ENST00000504413	ENSG00000250692	AC008667.2	0.014216	0	0	0	0	0
ENST00000521563	ENSG00000245146	MALINC1	0.048885	0	0	0	0	0
ENST00000508713	ENSG00000250069	AC011379.1	0.015446	0	0.00565	0	0	0.00325
ENST00000625195	ENSG00000278901	AC005609.1	0.012728	0	0	0	0	0
ENST00000624991	ENSG00000280029	AC244517.11	0.003699	0	0	0	0	0
ENST00000625053	ENSG00000280026	AC005618.3	0.014175	0	0	0	0	0
ENST00000624928	ENSG00000279855	AC005618.2	0.009978	0	0	0	0	0
ENST00000504204	ENSG00000251031	AC132803.1	0.088974	0	0	0.013215	0	0
ENST00000511390	ENSG00000250025	AC011396.2	0.010144	0	0	0	0	0
ENST00000512300	ENSG00000248362	AC011352.1	0.002948	0	0	0	0	0
ENST00000523269	ENSG00000249669	CARMN	0.028489	0	0	0	0	0
ENST00000602315	ENSG00000249669	CARMN	0.002912	0	0	0	0	0
ENST00000505340	ENSG00000249669	CARMN	0.010332	0	0	0	0	0
ENST00000518014	ENSG00000249669	CARMN	0.005571	0	0	0	5e-06	0
ENST00000564471	ENSG00000260581	AC011374.1	0.005028	0	0	0	0	0
ENST00000509655	ENSG00000251405	AC016571.1	0.004397	0	0	0	0	0
ENST00000635333	ENSG00000249738	AC008691.1	0.012042	0	0	0	0	0
ENST00000520705	ENSG00000254163	AC025434.1	0.004739	0	0	0	0	0
ENST00000523050	ENSG00000253660	AC008464.1	0.011576	0.004827	0	0	0	0
ENST00000524312	ENSG00000253858	AC008619.1	0.025482	0.004109	0	0	0	0
ENST00000506862	ENSG00000249306	LINC01411	0.069431	0	0	0	0	0
ENST00000511565	ENSG00000246334	PRR7-AS1	2.8e-05	0	0	0	0	0
ENST00000511517	ENSG00000250900	AC008443.6	0.008605	0	0	0	0	0
ENST00000508188	ENSG00000250999	AC136604.3	0.089444	0.000728	0	0.000786	0.017042	0.000762
ENST00000412295	ENSG00000248103	AC008443.3	0.049706	0	0	0	0	0
ENST00000531092	ENSG00000250903	GMDS-DT	0.075522	0	0	0	0	0
ENST00000529893	ENSG00000250903	GMDS-DT	0.01472	0	0	0	0.005659	0
ENST00000650019	ENSG00000285603	AL035693.1	0.001235	0	0	0	0	0
ENST00000454396	ENSG00000238158	AL391422.3	0.005601	0	0	0	0	0
ENST00000380106	ENSG00000205444	AL034376.1	0.013787	0.004054	0	0	0	0
ENST00000636202	ENSG00000228412	AL022068.1	0.001009	0	0	0	0	0
ENST00000648787	ENSG00000228412	AL022068.1	0.006273	0	0	0	0	0
ENST00000421167	ENSG00000233848	AL513188.1	0.006416	0	0	0	0	0
ENST00000650720	ENSG00000272168	CASC15	0.002217	0	0	0	0	0
ENST00000651751	ENSG00000272168	CASC15	0.03068	0	0	0	0.00218	0.00246
ENST00000606197	ENSG00000272168	CASC15	0.015472	0	0	0	0	0
ENST00000611708	ENSG00000275846	AL513548.3	0.004845	0	0	0	0	0
ENST00000648356	ENSG00000285849	AL021918.4	0.005135	0	0	0	0	0
ENST00000440874	ENSG00000231226	TRIM31-AS1	0.012628	0	0	0	0	0
ENST00000630472	ENSG00000281831	AL645929.2	0.002086	0	0	0	0	0
ENST00000649421	ENSG00000285647	AL671883.3	0.005324	0	0	0	0	0
ENST00000422366	ENSG00000232940	HCG25	0.025078	0	0	0	0	0
ENST00000477984	ENSG00000197251	LINC00336	0.007479	0	0	0	0	0
ENST00000450618	ENSG00000228559	AL033519.3	0.026485	0	0.013979	0	0	0
ENST00000629595	ENSG00000281450	PANDAR	0.004988	0	0.00278	0	0	0
ENST00000562471	ENSG00000261068	AL512274.1	0.077407	0.012315	0.004216	0.005159	0.005177	0.006273
ENST00000500590	ENSG00000245261	AL133375.1	0.007203	0	0	0	0	0
ENST00000425089	ENSG00000224984	AL512363.1	0.013446	0	0	0	0	0
ENST00000592038	ENSG00000226803	ZNF451-AS1	0.004856	0	0	0	0	0
ENST00000424274	ENSG00000232120	AL357375.1	0.007388	0	0	0	0	0
ENST00000429832	ENSG00000229154	KCNQ5-AS1	0.007157	0	0	0	0	0
ENST00000438676	ENSG00000225793	AL080250.1	0.009034	0	0	0	0	0
ENST00000580171	ENSG00000264017	RN7SL336P	0.022816	0	0	0	0	0
ENST00000369120	ENSG00000203808	BVES-AS1	0.029902	0	0	0	0	0
ENST00000580854	ENSG00000203808	BVES-AS1	0.019701	0	0	0.000908	0	0.009735
ENST00000456352	ENSG00000231889	TRAF3IP2-AS1	0.023007	0	0	0	0	0
ENST00000607066	ENSG00000231889	TRAF3IP2-AS1	0.008535	0	0	0	0	0.000154
ENST00000649523	ENSG00000230943	LINC02541	0.010472	0	0	0	0	0
ENST00000519270	ENSG00000228624	HDAC2-AS2	0.096628	0	0.029178	0	0	0
ENST00000520554	ENSG00000228624	HDAC2-AS2	0.032052	0	0	0	0	0
ENST00000417390	ENSG00000227945	AL590006.1	0.002585	0	0	0	0	0
ENST00000440246	ENSG00000236166	AL021408.1	0.01141	0	0	0	0	0
ENST00000457081	ENSG00000234567	AL024497.2	0.000967	0	0	0	0	0
ENST00000607531	ENSG00000232310	AL078590.3	0.004505	0.000986	0	0	0	0
ENST00000421378	ENSG00000231028	LINC00271	0.004987	0	0	0	0	0
ENST00000591489	ENSG00000235652	AL356599.1	0.084006	0.034581	0	0	0	0
ENST00000442094	ENSG00000227681	AL033504.1	0.003901	0	0	0	0	0
ENST00000606915	ENSG00000268592	AL355312.3	0.00273	0.001215	0	0	0	0
ENST00000455390	ENSG00000231654	RPS6KA2-AS1	0.004574	0	0	0	0	0
ENST00000415656	ENSG00000226291	AC091729.2	0.002522	0	0	0	0	0
ENST00000457484	ENSG00000230487	PSMG3-AS1	0.004369	0	0	0	0	0
ENST00000403226	ENSG00000217455	AC073316.1	0.017825	0	0	0	0	0
ENST00000608770	ENSG00000272732	AC004982.1	0.035977	0	0	0	0	0
ENST00000415934	ENSG00000230751	AC007036.2	0.152644	0	0.006062	0	0.009342	0
ENST00000605778	ENSG00000271122	AC018647.2	1.55479	0.002541	0.001213	0.001273	0.002373	0.003341
ENST00000629357	ENSG00000281103	TRG-AS1	0.002162	0	0	0	0	0
ENST00000340510	ENSG00000188185	LINC00265	0.259028	0	0.001402	0	0	0.028211
ENST00000420821	ENSG00000224116	INHBA-AS1	0.021218	0.011196	0	0	0	0
ENST00000569883	ENSG00000261019	AC010132.4	0.016607	0	0.006246	0	0	0
ENST00000425077	ENSG00000228596	AC013436.1	0.012075	0	0	0	0	0
ENST00000580528	ENSG00000232956	SNHG15	0.010075	0	0	0.000859	0	0.004258
ENST00000650830	ENSG00000205628	LINC01446	0.002736	0	0	0	0	0
ENST00000652104	ENSG00000205628	LINC01446	0.003566	0	0	0	0	0
ENST00000652029	ENSG00000205628	LINC01446	0.017188	0	0	0	0	0
ENST00000610177	ENSG00000273142	LINC02604	0.048568	0	0.009296	0.006078	0	0.002857
ENST00000437763	ENSG00000232667	AC004862.1	0.002229	0	0	0	0	0
ENST00000438538	ENSG00000236453	AC003092.1	0.054997	0.015725	0	0	0	0
ENST00000642601	ENSG00000285090	AC002074.1	0.098311	0.002828	0.027891	0.022558	0	0
ENST00000610062	ENSG00000272950	AC093799.1	0.013587	0	0	0	0	0
ENST00000640670	ENSG00000284523	AC004834.1	0.08316	0	0	0	0	0
ENST00000624140	ENSG00000279168	AC105052.4	0.331386	0.091943	0	0.084677	0	0
ENST00000450686	ENSG00000228393	LINC01004	0.01842	0	0	0	0	0
ENST00000629014	ENSG00000233705	SLC26A4-AS1	0.008702	0	0	0	0	0
ENST00000648778	ENSG00000272701	MESTIT1	0.009449	0	0	0	0	0
ENST00000463561	ENSG00000284644	AC074386.1	0.005289	0	0	0	0.002456	0
ENST00000464464	ENSG00000239911	PRKAG2-AS1	0.049722	0	0	0	0	0
ENST00000440711	ENSG00000182648	LINC01006	0.04103	0.004705	0	0	0	0
ENST00000522897	ENSG00000249898	MCPH1-AS1	0.006285	0	0	0	0	0
ENST00000649916	ENSG00000248538	AC022784.1	0.007192	0	0	0	0	0
ENST00000649829	ENSG00000248538	AC022784.1	0.000206	0	0	0	0	0
ENST00000647867	ENSG00000248538	AC022784.1	0.00065	0	0	0	0	0
ENST00000524047	ENSG00000253641	AC104964.1	0.020135	0	0	0	0	0
ENST00000528629	ENSG00000269954	AC022239.1	0.024807	0	0	0	0	0.000612
ENST00000528514	ENSG00000255495	AC145124.1	0.620068	8.2e-05	0.005001	0.00138	0.011062	0.005328
ENST00000525829	ENSG00000227888	FAM66A	0.00626	0.001395	0	0	0	0
ENST00000624433	ENSG00000279932	AP006248.4	0.034129	0	0	0.0152	0	0
ENST00000518623	ENSG00000251191	LINC00589	0.00924	0	0	0	0	0
ENST00000560714	ENSG00000259607	AC108449.3	0.147376	0	0	0.027003	0.024297	0.030893
ENST00000517897	ENSG00000253388	AC124067.1	0.007304	0	0	0	0	0
ENST00000522575	ENSG00000253608	AC022915.2	0.003322	0	0	0	0	0
ENST00000522408	ENSG00000253484	AC113145.1	0.092691	0	0	0	0	0.023861
ENST00000520496	ENSG00000254314	AC021915.2	0.012408	0	0	0	0	0
ENST00000520357	ENSG00000228801	AC064807.1	0.05382	0.002127	0	0	0	0.001371
ENST00000523166	ENSG00000253139	AC013644.1	0.003158	0	0	0	0	0
ENST00000525556	ENSG00000254802	AC022182.2	0.008745	0	0	0	0	0
ENST00000532232	ENSG00000251396	LINC01301	0.034693	0	0	0	0	0
ENST00000505627	ENSG00000251127	AC091173.1	0.011461	0	0	0	0.003816	0
ENST00000607397	ENSG00000271966	AC021321.1	0.354738	0.003529	0.005907	0.029513	0.023053	0.019901
ENST00000521467	ENSG00000235531	MSC-AS1	0.079064	0	0	0	0	0
ENST00000522703	ENSG00000253302	STAU2-AS1	0.045143	0	0	0	0	0
ENST00000565862	ENSG00000260398	AC068700.1	0.014825	0	0	0	0	0.002619
ENST00000518631	ENSG00000253553	AC090578.1	0.027957	0.000144	0	0	0	0
ENST00000521936	ENSG00000253553	AC090578.1	0.005364	0	0	0	0	0
ENST00000519655	ENSG00000251136	AF117829.1	0.010476	0	0	0.004048	0	0
ENST00000621883	ENSG00000251136	AF117829.1	0.244882	0.000462	4e-06	0.000238	0.043226	7e-06
ENST00000602771	ENSG00000270077	AP003117.1	0.024984	0	0	0	0	0.010056
ENST00000420417	ENSG00000229625	AC016877.1	0.002524	0	0	0	0	0
ENST00000519337	ENSG00000253385	AP003696.1	0.017397	0	0	0	0	0.004256
ENST00000518927	ENSG00000254041	AC021546.1	0.007642	0	0	0	0	0
ENST00000517376	ENSG00000253477	AC012213.1	0.010415	0	0	0	0	0
ENST00000499579	ENSG00000248050	AC079061.1	0.004484	0	0	0	0	0
ENST00000521048	ENSG00000253972	MAL2-AS1	0.005791	0	0	0	0	0
ENST00000607710	ENSG00000272384	AC016405.3	0.062577	0.003676	0.005554	0.000608	0.002037	0
ENST00000521258	ENSG00000253607	AC104316.1	0.009384	0	0	0.001913	0	0
ENST00000467740	ENSG00000242170	RN7SL329P	0.071503	0.0064	0	0	0	0
ENST00000643101	ENSG00000253438	PCAT1	0.00515	0	0	0	0	0
ENST00000644627	ENSG00000253438	PCAT1	0.010069	0	0	0	0	0
ENST00000513868	ENSG00000249859	PVT1	0.110732	0	0	0	0	0
ENST00000650846	ENSG00000249859	PVT1	0.016348	0	0	0	0.005144	0
ENST00000651664	ENSG00000249859	PVT1	0.014201	0	0	0	0	0
ENST00000521122	ENSG00000249859	PVT1	0.0001	0	0	0	0	0
ENST00000521014	ENSG00000254263	AC022973.3	0.00478	0	0	0	0	0
ENST00000305248	ENSG00000218839	FAM138C	0.010903	0	0	0	0	0
ENST00000424605	ENSG00000236404	VLDLR-AS1	0.004404	0	0	0	0	0
ENST00000427722	ENSG00000232104	RFX3-AS1	0.024349	0	0	0.001666	0	0.004731
ENST00000603198	ENSG00000270372	AL162413.1	0.367619	0.018536	0.021017	0.024317	0.024194	0.021806
ENST00000416996	ENSG00000225472	AL136366.1	0.008174	0	0	0	0	0
ENST00000439447	ENSG00000230694	AL450003.1	0.040453	0	0	0	0	0
ENST00000450445	ENSG00000234779	BNC2-AS1	0.064896	0	0	0	0	0
ENST00000433645	ENSG00000234840	LINC01239	0.001293	0	0	0	0	0
ENST00000581051	ENSG00000240498	CDKN2B-AS1	0.026286	0	0	0	0	0
ENST00000582072	ENSG00000240498	CDKN2B-AS1	0.017635	0	0	0	0	0
ENST00000433357	ENSG00000226562	CYP4F26P	0.018473	0	0	0	0	0
ENST00000602933	ENSG00000226562	CYP4F26P	0.09952	0	0	0	0.039955	0
ENST00000432139	ENSG00000226562	CYP4F26P	0.010885	0	0.003708	0	0	0
ENST00000448245	ENSG00000228352	AL354989.1	0.029706	0	0	0	0	0
ENST00000515888	ENSG00000251697	RN7SKP24	0.013872	0	0	0	0	0
ENST00000427509	ENSG00000238113	LINC01410	0.04068	0	0	0	0	0
ENST00000438699	ENSG00000234665	AL512625.3	0.014578	0	0	0	0.002782	0.001335
ENST00000429953	ENSG00000234394	AL353608.3	0.001797	0	0	0	0	0
ENST00000590767	ENSG00000233178	AL161457.2	0.035018	0	0	0	0	0
ENST00000645704	ENSG00000225937	PCA3	0.000617	0	0	0	0	0
ENST00000647300	ENSG00000225937	PCA3	0.004764	0	0	0	0	0
ENST00000602579	ENSG00000269994	AL513318.2	0.003916	0	0	0	0	0
ENST00000454869	ENSG00000232063	AL691447.2	0.012841	0	0	0	0	0
ENST00000562653	ENSG00000260677	AL445531.1	0.00228	0	0	0	0	0
ENST00000416507	ENSG00000228707	AL691426.1	0.019323	0	0	0.010453	0	0
ENST00000444701	ENSG00000234692	AL355601.1	0.130491	0.006328	0	0	0	0.052754
ENST00000647206	ENSG00000284977	AL160272.1	0.011688	0	0.004225	0	0	0
ENST00000637073	ENSG00000227355	AL359644.1	0.028147	0	0	0	0	0
ENST00000608502	ENSG00000207955	AL359091.1	0.000838	0	0	0	0	0
ENST00000586290	ENSG00000236986	AL157938.2	0.0028	0	0	0	0	0
ENST00000435284	ENSG00000228877	AL669970.3	8.7e-05	0	0	0	0	0
ENST00000434938	ENSG00000236871	LINC00106	0.329996	0	0.068276	0	0.10182	0
ENST00000602357	ENSG00000236017	ASMTL-AS1	0.011146	0	0	0	0	0
ENST00000433228	ENSG00000235834	Z93022.1	0.029835	0	0	0.011969	0	0
ENST00000441146	ENSG00000229331	GK-IT1	0.022352	0	0	0	0.009692	0
ENST00000649640	ENSG00000285709	AL592164.2	0.043478	0	0	0	0	0
ENST00000475761	ENSG00000242559	RN7SL144P	0.038373	0	0	0	0	0
ENST00000422047	ENSG00000229563	LINC01204	0.020846	0.004886	0	0	0.000149	0
ENST00000650740	ENSG00000286118	AC234031.2	0.057534	0.019086	0	0	0	0
ENST00000423992	ENSG00000230590	FTX	0.011109	0	0	0	0	0
ENST00000618701	ENSG00000277922	RF02122	0.023366	0	0	0	0	0
ENST00000580570	ENSG00000266420	RN7SL118P	0.01835	0	0	0	0	0
ENST00000414435	ENSG00000237903	AC004000.1	0.048332	0	0.019735	0	0	0
ENST00000432062	ENSG00000235189	AL034405.1	0.065124	0	0	0	0	0
ENST00000434384	ENSG00000227060	LINC00629	0.013598	0	0	0	0	0
ENST00000440614	ENSG00000235813	AL672032.1	0.020005	0.009971	0	0	0	0
ENST00000650128	ENSG00000203930	LINC00632	0.01293	0	0	0	0	0
ENST00000450989	ENSG00000235703	LINC00894	0.021055	0	0	0	0	0.006899
ENST00000598177	ENSG00000272681	FAM223B	0.000166	0	0	0	0	0
ENST00000625031	ENSG00000279245	FAM223A	0.098807	0	0	0	0	0
ENST00000439059	ENSG00000230023	AL590683.1	0.008182	0	0	0	0	0
ENST00000370624	ENSG00000180869	LINC01555	0.005464	0.002885	0	0	0	0
ENST00000461982	ENSG00000242565	RN7SL372P	0.023268	0	0	0	0	0
ENST00000635112	ENSG00000224259	LINC01133	0.003948	0	0	0	0	0
ENST00000426519	ENSG00000234142	LINC01675	0.00953	0	0	0	0	0
ENST00000422858	ENSG00000225857	AL162431.1	0.016014	0	0	0	0	0
ENST00000608148	ENSG00000273012	AL353600.1	0.029404	0	0	0	0	0
ENST00000412075	ENSG00000229847	EMX2OS	0.015374	0	0	0	0	0
ENST00000621752	ENSG00000274685	AL360181.4	0.028813	0	0	0	0	0
ENST00000534742	ENSG00000255026	AC136475.3	0.029036	0	0	0	0.012923	0
ENST00000634971	ENSG00000255269	AC024475.3	0.004229	0	0	0	0	0
ENST00000506329	ENSG00000250230	AP002754.1	0.003354	0	0	0	0	0
ENST00000534065	ENSG00000254458	AP001107.3	0.018876	0	0	0	0	0
ENST00000604700	ENSG00000271390	AP003973.2	0.047371	0	0	0	0	0
ENST00000567082	ENSG00000261257	AP000821.1	0.004127	0	0	0	0	0
ENST00000631195	ENSG00000281097	AP003500.1	0.002574	0	0	0	0	0
ENST00000532071	ENSG00000255512	AP005135.1	0.010992	0	0	0	0	0
ENST00000631571	ENSG00000282080	AC006511.4	0.032115	0.00356	0	0	0	0.005724
ENST00000612592	ENSG00000275119	AC244131.2	0.046009	0	0	0	0	0
ENST00000535066	ENSG00000257009	AC022367.1	0.014673	0	0	0	0	0
ENST00000537327	ENSG00000256513	AC022081.1	0.016855	0	0	0	0	0
ENST00000612250	ENSG00000278011	AC024941.1	0.032241	0	0	0	0	0
ENST00000604017	ENSG00000271382	AC012464.3	0.001392	0	0	0	0	0
ENST00000637566	ENSG00000283459	AC009804.2	0.002599	0	0	0	0	0
ENST00000547948	ENSG00000257726	AC078880.2	0.018694	0	0	0	0	0
ENST00000552992	ENSG00000258018	LINC02457	0.01322	0	0	0	0	0
ENST00000541258	ENSG00000256659	LINC02368	0.005903	0	0	0	0	0
ENST00000414407	ENSG00000237879	LINC00398	0.005943	0	0	0	0	0
ENST00000568811	ENSG00000261728	AL138690.1	0.003501	0	0	0	0	0
ENST00000419499	ENSG00000235532	LINC00402	0.038985	0.001709	0	0.008269	0.003142	0
ENST00000325811	ENSG00000177596	AL355390.1	0.003385	0	0	0	0	0
ENST00000442478	ENSG00000234625	LINC00380	0.013378	0	0	0	0	0
ENST00000619612	ENSG00000277246	AL157762.1	0.00405	0	0	0	0	0
ENST00000555481	ENSG00000258642	AL133371.1	0.03589	0	0	0	0	0.012739
ENST00000557308	ENSG00000259111	AL079307.2	0.006039	0	0	0	0	0
ENST00000555600	ENSG00000259039	AL161804.1	0.011129	0	0	0	0	0
ENST00000531609	ENSG00000255002	LINC02324	0.009672	0	0	0	0	0
ENST00000556346	ENSG00000258390	LINC02318	0.017133	0	0	0	0	0
ENST00000623367	ENSG00000258729	AL355102.3	0.000658	0	0	0	0	0
ENST00000556430	ENSG00000258811	AL583810.2	0.002421	0	0	0	0	0
ENST00000559904	ENSG00000259437	AC093334.1	0.008398	0	0	0	0	0
ENST00000560760	ENSG00000259548	AC021483.1	0.031209	0	0	0	0	0
ENST00000616660	ENSG00000273923	AC104260.1	0.021928	0	0	0	0	0
ENST00000645754	ENSG00000285040	AC092723.4	0.004067	0	0	0	0	0
ENST00000565053	ENSG00000259881	AC092384.2	0.002958	0	0	0	0	0
ENST00000563763	ENSG00000284837	AC007846.1	0.004327	0	0	0	0	0
ENST00000379640	ENSG00000205325	AC005863.1	0.002628	0	0	0	0	0
ENST00000577621	ENSG00000266588	AC006441.4	0.01545	0	0	0	0	0
ENST00000612725	ENSG00000278740	AC005332.7	0.025373	0.00578	0	0	0.008476	0
ENST00000572353	ENSG00000262188	LINC01978	0.043774	0	0	0	0	0
ENST00000572036	ENSG00000262873	AC127496.5	0.018134	0	0	0	0	0
ENST00000570301	ENSG00000262223	AC110285.1	0.007226	0	0	0	0	0
ENST00000608890	ENSG00000273348	AC027449.1	0.054981	0	0	0	0	0.023994
ENST00000589729	ENSG00000267215	AC040963.1	0.009662	0	0	0	0	0
ENST00000323355	ENSG00000179676	LINC00305	0.009026	0	0	0	0	0
ENST00000587174	ENSG00000266924	AC021594.1	0.012389	0	0	0	0	0
ENST00000588799	ENSG00000267275	AC020911.2	0.006288	0	0	0	0	0
ENST00000597420	ENSG00000269564	AC008753.2	0.010791	0	0	0	0	0
ENST00000449621	ENSG00000226277	AC105393.1	0.006231	0	0	0	0	0
ENST00000606068	ENSG00000272342	AC116609.3	0.040831	0	0.013378	0	0	0
ENST00000366424	ENSG00000203635	AC144450.1	0.02404	0	0.005207	0	0	0
ENST00000416534	ENSG00000226506	AC007463.1	0.009531	0	0	0	0	0
ENST00000415635	ENSG00000237261	RF00017	0.010116	0	0	0	0	0
ENST00000484688	ENSG00000275961	RN7SL210P	0.01222	0	0	0	0	0
ENST00000581238	ENSG00000264275	RN7SL753P	0.039668	0	0	0	0	0
ENST00000438070	ENSG00000229321	AC008269.1	0.021044	0	0	0	0	0.00969
ENST00000424628	ENSG00000231896	AC019185.2	0.009597	0	0	0	0	0
ENST00000608881	ENSG00000272555	AC009974.1	0.017317	0	0	0	0	0
ENST00000419003	ENSG00000230176	LINC01433	0.008599	0	0	0	0	0
ENST00000432706	ENSG00000223492	AL391097.1	0.004653	0	0	0	0	0
ENST00000423020	ENSG00000231977	AL096828.1	0.032285	0	0	0	0	0
ENST00000652368	ENSG00000286103	AC124864.3	0.008008	0	0	0	0	0
ENST00000447535	ENSG00000233056	ERVH48-1	0.001236	0	0	0	0	0
ENST00000445242	ENSG00000229382	BX322557.1	0.07202	0	0	0	0	0.024833
ENST00000605505	ENSG00000187012	LINC00207	0.008481	0	0	0	0	0
ENST00000492683	ENSG00000240708	LINC02030	0.012247	0	0	0.006528	0	0
ENST00000474149	ENSG00000242145	AC099542.2	0.009484	0	0	0	0	0
ENST00000503186	ENSG00000249145	LINC02517	0.010948	0	0	0	0	0
ENST00000637313	ENSG00000283314	LINC02357	0.004858	0	0	0	0	0
ENST00000510772	ENSG00000249771	AC108210.1	0.009551	0	0	0	0	0
ENST00000561705	ENSG00000260265	LINC02562	0.012957	0	0	0	0	0
ENST00000567197	ENSG00000260265	LINC02562	0.002656	0	0	0	0	0
ENST00000438151	ENSG00000229717	AC110615.1	0.011984	0	0	0.005349	0	0
ENST00000626286	ENSG00000280711	JADRR	0.004578	0	0	0	0	0
ENST00000507038	ENSG00000250195	AC109927.1	0.00524	0	0	0	0	0
ENST00000504144	ENSG00000245954	LINC02273	0.007416	0	0	0	0	0
ENST00000512831	ENSG00000248431	AC005150.1	0.006597	0	0	0	0	0
ENST00000617323	ENSG00000249096	LINC02362	0.003855	0	0	0	0	0
ENST00000606482	ENSG00000272416	AC025175.1	0.242436	0.005481	0.033775	0.006843	0.027604	0.012952
ENST00000506550	ENSG00000251575	C5orf64-AS1	0.006229	0	0	0	0	0
ENST00000515706	ENSG00000250124	AC016550.3	0.015752	0	0	0	0	0
ENST00000504436	ENSG00000250958	LINC00492	0.010054	0	0	0	0	0
ENST00000501405	ENSG00000247402	AC099487.1	0.01669	0	0	0	0	0
ENST00000512900	ENSG00000248709	AC008549.1	0.005468	0	0	0	0	0
ENST00000508424	ENSG00000248445	SEMA6A-AS1	0.006653	0	0	0	0	0
ENST00000508640	ENSG00000248445	SEMA6A-AS1	0.00044	0	0	0	0	0
ENST00000514214	ENSG00000248445	SEMA6A-AS1	0.009969	0	0	0	0	0
ENST00000607594	ENSG00000271766	AC010424.2	0.008683	0	0	0	0	0
ENST00000520443	ENSG00000253965	AC008438.2	0.024879	0	0	0	0	0
ENST00000568244	ENSG00000261730	AL034346.1	0.00617	0	0	0	0	0
ENST00000624527	ENSG00000164385	LINC01600	0.003226	0	0	0	0	0
ENST00000606727	ENSG00000225595	LINC01623	0.012507	0	0	0	0	0
ENST00000458361	ENSG00000237775	DDR1-DT	0.001973	0	0	0	0	0
ENST00000620671	ENSG00000205971	AC074389.1	0.008537	0	0	0	0	0
ENST00000458624	ENSG00000244239	AC007009.1	0.013794	0	0	0	0	0
ENST00000442176	ENSG00000229108	LINC02587	0.010484	0	0	0	0	0
ENST00000446246	ENSG00000235669	AC004593.1	0.000823	0	0	0	0	0
ENST00000450540	ENSG00000223813	AC007255.1	0.005726	0	0	0	0	0
ENST00000561845	ENSG00000260070	AC006960.3	0.033529	0	0	0	0	0
ENST00000624628	ENSG00000279072	AC118758.3	0.003655	0	5.9e-05	0.000423	0	0
ENST00000608625	ENSG00000272915	AC018635.2	0.019626	0	0	0	0	0
ENST00000562524	ENSG00000259920	AC007938.1	0.002118	0	0	0	0	0
ENST00000378120	ENSG00000204960	BLACE	8.1e-05	0	0	0	0	0
ENST00000569431	ENSG00000260426	AC008060.4	0.004192	0	0	0	0	0
ENST00000594086	ENSG00000269446	AC006967.3	0.006776	0	0	0	0	0
ENST00000442017	ENSG00000229660	AC004975.2	0.083675	0	0	0	0	0
ENST00000522213	ENSG00000254367	AC087269.1	0.011831	0	0	0	0	0
ENST00000521242	ENSG00000253230	LINC00599	0.001284	0	0	0	0	0
ENST00000625198	ENSG00000255394	C8orf49	0.005572	0	0	0	0	0
ENST00000520386	ENSG00000254178	AC090103.1	0.032492	0	0	0	0	0
ENST00000523554	ENSG00000253842	AP003472.2	0.015711	0	0	0	0	0
ENST00000517318	ENSG00000254021	AC027031.1	0.016113	0	0	0	0	0
ENST00000517704	ENSG00000254008	LINC00051	0.006325	0	0	0	0	0
ENST00000460565	ENSG00000240306	RN7SL100P	0.019721	0	0	0	0	0
ENST00000420315	ENSG00000228072	AL139008.2	0.009934	0	0	0	0	0
ENST00000454408	ENSG00000230676	AL353803.2	0.016886	0	0	0	0	0
ENST00000602508	ENSG00000269911	FAM226B	0.002644	0	0	0	0	0
ENST00000651012	ENSG00000286000	AC234775.4	0.002842	0	0	0	0	0
ENST00000564206	ENSG00000261409	AL035425.3	0.001572	0	0	0	0	0
ENST00000608811	ENSG00000237863	AL035425.1	0.011869	0	0	0	0	0
ENST00000436013	ENSG00000237863	AL035425.1	0.001173	0	0	0	0	0
ENST00000427671	ENSG00000230899	MAGEA8-AS1	0.015119	0	0	0	0	0
TCONS_00021447	ENSG00000116151	MORN1	0.004466	0	0	0	0	0.002412
TCONS_00001853	ENSG00000162592	CCDC27	0.134487	0	0	0	0	0
TCONS_00022372	ENSG00000116721	PRAMEF1	0.089272	0	0	0	0.019057	0
TCONS_00002808	ENSG00000142621	FHAD1	0.002003	0	0	0	0	0
TCONS_00022457	ENSG00000215704	CELA2B	0.086632	0	0	0	0	0
TCONS_00002974	ENSG00000186510	CLCNKA	0.02447	0	0.008846	0	0	0
TCONS_00023098	ENSG00000158825	CDA	0.062268	0	0.013136	0.004735	0	0
TCONS_00003477	ENSG00000117245	KIF17	0.061678	0.002076	0	0	0	0
TCONS_00023493	XLOC_009487	XLOC_009487	0.076554	0	0	0.02432	0	0.015242
TCONS_00023630	ENSG00000001460	STPG1	0.00696	0	0	0	0	0
TCONS_00004503	ENSG00000130775	THEMIS2	0.082156	0	0	0	0	0
TCONS_00024803	XLOC_009981	XLOC_009981	0.112571	0.006154	0	0	0	0
TCONS_00006151	XLOC_002650	XLOC_002650	0.001473	0	0	0	0.000285	0
TCONS_00007947	XLOC_003193	XLOC_003193	0.078011	0	0	0	0	0
TCONS_00027530	XLOC_010974	XLOC_010974	0.017752	0	0	0	0	0
TCONS_00008393	XLOC_003394	XLOC_003394	0.016381	0	0	0	0	0.009038
TCONS_00008399	XLOC_003394	XLOC_003394	0.035886	0	0.003721	0	0	0
TCONS_00008493	ENSG00000197568	HHLA3	0.139377	0	0	0	0	0
TCONS_00029352	XLOC_011861	XLOC_011861	0.066349	0	0	0	0	0
TCONS_00029434	XLOC_011880	XLOC_011880	0.098082	0	0	0.003958	0.005736	0
TCONS_00030146	ENSG00000081026	MAGI3	0.115681	0.014562	0.017865	0.003131	0	0.017941
TCONS_00030424	ENSG00000163393	SLC22A15	0.01086	0	0	0	0	0
TCONS_00031920	ENSG00000197622	CDC42SE1	0.514143	0	0	0	0	0.211398
TCONS_00032200	XLOC_012962	XLOC_012962	0.01771	0	0	0	0	0
TCONS_00014982	ENSG00000198842	DUSP27	0.006351	0	0	0	0	0
TCONS_00036306	XLOC_014643	XLOC_014643	0.071306	0	0	0	0	0.005982
TCONS_00017590	ENSG00000123836	PFKFB2	0.08639	0	0	0	0	0
TCONS_00018843	ENSG00000143786	CNIH3	0.003344	0	0	0	0	0
TCONS_00018818	ENSG00000143786	CNIH3	0.039425	0	0	0	0	0
TCONS_00037712	ENSG00000143776	CDC42BPA	1.25565	0.113157	0.02005	0.017564	0.011081	0.024804
TCONS_00037869	ENSG00000162931	TRIM17	0.036381	0	0	0	0	0
TCONS_00019288	XLOC_007861	XLOC_007861	0.129717	0.014898	0.00765	0.016468	0.009394	0.008801
TCONS_00038131	ENSG00000116991	SIPA1L2	0.060751	0	0	0	0	0.014899
TCONS_00038133	XLOC_015548	XLOC_015548	0.037454	0	0	0	0.020738	0
TCONS_00038311	XLOC_015635	XLOC_015635	0.075706	0.017421	0	0	0	0
TCONS_00020022	ENSG00000077522	ACTN2	0.048192	0.025152	0	0	0	0
TCONS_00020159	XLOC_008273	XLOC_008273	0.023442	0	0	0	0	0
TCONS_00020208	ENSG00000155816	FMN2	0.085478	0	0.043619	0	0	0
TCONS_00038613	ENSG00000182901	RGS7	0.017163	0	0.005765	0	0	0
TCONS_00047350	XLOC_019784	XLOC_019784	0.031434	0.002349	0	0	0	0
TCONS_00039454	XLOC_016246	XLOC_016246	0.063097	0	0	0	0	0
TCONS_00047840	ENSG00000151461	UPF2	0.163208	0	0.003724	0.009048	0	0.011223
TCONS_00048050	ENSG00000185267	CDNF	0.0255	0	0	0.000348	0.008282	0.001605
TCONS_00048109	ENSG00000148468	FAM171A1	0.001724	0	0	0	0	0
TCONS_00040225	ENSG00000152464	RPP38	0.067691	0	0	0	0	0
TCONS_00040617	ENSG00000120549	KIAA1217	0.076796	0.012009	0.008992	0.004169	0	0.005405
TCONS_00048747	ENSG00000197321	SVIL	0.025859	0	0	0.006667	0	0
TCONS_00041150	ENSG00000095794	CREM	0.055951	0.001954	0.00756	0.000791	0.000558	0.005706
TCONS_00041352	ENSG00000283930	AL117339.5	0.013297	0	0	0	0	0
TCONS_00041835	XLOC_017308	XLOC_017308	0.00466	0	0	0	0	0
TCONS_00041812	XLOC_017288	XLOC_017288	0.011543	0	0	0	0	0
TCONS_00042195	XLOC_017488	XLOC_017488	0.11424	0	0	0	0	0
TCONS_00042521	ENSG00000183230	CTNNA3	0.163655	0.007306	0.002469	0	0	0.047829
TCONS_00042524	ENSG00000183230	CTNNA3	0.112274	0.01073	0.011256	0.035292	0.0008	0.002429
TCONS_00042531	ENSG00000183230	CTNNA3	0.049433	0	0	0	0	0
TCONS_00043423	ENSG00000148655	LRMDA	0.001239	0	0	0	0	0
TCONS_00043435	ENSG00000148655	LRMDA	0.014181	0	0.000826	0	0	0
TCONS_00051961	ENSG00000107864	CPEB3	0.073311	0	0.004442	0	0	0
TCONS_00052519	ENSG00000119943	PYROXD2	0.47356	0	0.07456	0	0.145116	0
TCONS_00053176	ENSG00000065621	GSTO2	0.016052	0	0	0	0	0
TCONS_00053535	XLOC_022698	XLOC_022698	0.015775	0	0	0	0	0
TCONS_00053610	XLOC_022739	XLOC_022739	0.101289	0	0	0	0	0
TCONS_00054115	ENSG00000203805	PLPP4	0.012168	0	0	0	0	0
TCONS_00047041	ENSG00000171813	PWWP2B	0.101443	0.001385	0.000644	0	0.003494	0.001637
TCONS_00055437	XLOC_023418	XLOC_023418	0.101281	0.009423	0	0.024752	0	0.00553
TCONS_00067243	ENSG00000239920	AC104389.4	0.033975	0	0	0	0	0
TCONS_00068025	ENSG00000133816	MICAL2	0.060408	0.003351	0	0	0	0
TCONS_00056831	ENSG00000129159	KCNC1	0.08614	0	0	0	0	0
TCONS_00068868	XLOC_028185	XLOC_028185	0.05389	0	0	0	0	0
TCONS_00069076	XLOC_028395	XLOC_028395	0.02387	0	0	0	0	0
TCONS_00069701	XLOC_028598	XLOC_028598	0.044795	0	0.000128	0.000107	0	0
TCONS_00058411	ENSG00000175224	ATG13	0.000561	0	0	0	0	0
TCONS_00060957	ENSG00000174669	SLC29A2	0.01005	0	0	0	0	0.002194
TCONS_00061177	ENSG00000173120	KDM2A	0.897829	0.034829	0.42344	0	0.017159	0
TCONS_00073266	ENSG00000162105	SHANK2	0.002911	0	0	0	0	0
TCONS_00061780	ENSG00000162105	SHANK2	0.073737	0	0	0	0	0
TCONS_00062256	ENSG00000187726	DNAJB13	0.007611	0.001553	0	0	0	0
TCONS_00074555	XLOC_030397	XLOC_030397	0.00743	0	0	0	0	0
TCONS_00074977	XLOC_030542	XLOC_030542	0.078662	0	0.011023	0	0	0
TCONS_00063222	XLOC_026168	XLOC_026168	0.100161	0.021154	0	0	0.026678	0.004166
TCONS_00075583	ENSG00000149972	CNTN5	0.014538	0	0	0	0	0
TCONS_00064117	ENSG00000110675	ELMOD1	0.0231	0	0	0	0	0
TCONS_00077003	XLOC_031438	XLOC_031438	0.033955	0	0	0	0	0
TCONS_00065458	ENSG00000023171	GRAMD1B	0.046913	0	0	0	0	0
TCONS_00077730	ENSG00000149418	ST14	0.035097	0	0	0	0	0
TCONS_00079581	ENSG00000111266	DUSP16	0.037456	0	0	0	0	0
TCONS_00090821	XLOC_036432	XLOC_036432	0.082201	0	0	0	0	0
TCONS_00090878	ENSG00000111700	SLCO1B3	0.006773	0	0	0	0	0
TCONS_00090889	ENSG00000111700	SLCO1B3	0.094685	0	0.006581	0	0	0.007664
TCONS_00080091	ENSG00000111711	GOLT1B	3.89433	0	0	0	0	0.6035
TCONS_00090977	ENSG00000111728	ST8SIA1	0.050439	0.005059	0	0	0	0
TCONS_00091606	ENSG00000139131	YARS2	0.016008	0	0	0	0	0.001962
TCONS_00081393	ENSG00000211584	SLC48A1	0.521897	0.002579	0.055356	0.207836	0.001489	0.029638
TCONS_00092803	ENSG00000167588	GPD1	0.048791	0.021163	0	0	0	0
TCONS_00093070	ENSG00000196876	SCN8A	0.017694	2.6e-05	0	0	0	0
TCONS_00082224	ENSG00000284791	SMIM41	0.000497	0	0	0	0	0
TCONS_00094504	ENSG00000135446	CDK4	0.003522	0	0	0	0	0
TCONS_00083630	XLOC_033770	XLOC_033770	0.028968	0	0	0	0	0
TCONS_00095340	XLOC_038184	XLOC_038184	0.005462	0	0	0	0	0
TCONS_00096930	ENSG00000120820	GLT8D2	0.101576	0	0	0	0.005608	0.014201
TCONS_00097374	XLOC_039116	XLOC_039116	0.035567	0	0	0	0	0
TCONS_00097939	XLOC_039272	XLOC_039272	0.063201	0	0.000516	0	0	0
TCONS_00097886	ENSG00000135094	SDS	0.003155	0	0	0	0	0
TCONS_00087293	ENSG00000176834	VSIG10	0.030017	0	0	0	0	0
TCONS_00099660	ENSG00000072609	CHFR	0.125484	0	0	0	0	0
TCONS_00099775	XLOC_039928	XLOC_039928	0.267963	0	0	0	0	0
TCONS_00100578	ENSG00000073910	FRY	0.088458	0	0	0	0	0
TCONS_00100944	ENSG00000188811	NHLRC3	0.443054	0.024718	0	0.115722	0	0.031354
TCONS_00105226	ENSG00000183722	LHFPL6	0.015793	0	0	0	0	0
TCONS_00105953	XLOC_042954	XLOC_042954	0.068099	0.002746	0.013382	0.003041	0.001526	0.002785
TCONS_00102018	XLOC_040985	XLOC_040985	2.2e-05	0	0	0	0	0
TCONS_00102160	XLOC_041096	XLOC_041096	0.048273	0.024026	0	0	0	0
TCONS_00102161	XLOC_041096	XLOC_041096	0.022599	0	0	0	0	0
TCONS_00107638	XLOC_043953	XLOC_043953	0.026361	0.005084	0.003317	0	0	0.006028
TCONS_00107627	XLOC_043942	XLOC_043942	0.101158	0.005903	0.041596	0	0	2e-05
TCONS_00107940	XLOC_044149	XLOC_044149	0.010458	0	0	0	0	0
TCONS_00108156	ENSG00000185989	RASA3	0.031695	0	0	0.004095	0.007518	0
TCONS_00108381	XLOC_044357	XLOC_044357	0.054111	0.026197	0	0	0	0
TCONS_00109728	ENSG00000151322	NPAS3	0.064989	0	0	0	0	0
TCONS_00111708	ENSG00000185650	ZFP36L1	0.082571	0	0.007208	0	0	0
TCONS_00112460	ENSG00000119699	TGFB3	0.078429	0.016955	0	0.011049	0	0
TCONS_00120786	XLOC_049199	XLOC_049199	0.042325	0.018677	0	0	0	0
TCONS_00114697	ENSG00000142208	AKT1	1.36797	0	0	0	0.15842	0
TCONS_00114747	ENSG00000140104	CLBA1	0.157709	0	0	0	0	0
TCONS_00122419	ENSG00000166664	CHRFAM7A	0.02556	0	0	0	0	0
TCONS_00129559	XLOC_052604	XLOC_052604	0.177245	0.039825	0.018502	0	0.018839	0.008825
TCONS_00130340	ENSG00000137860	SLC28A2	0.0085	0	0	0	0	0
TCONS_00123914	XLOC_050433	XLOC_050433	0.00834	0	0	0	0	0
TCONS_00123915	XLOC_050433	XLOC_050433	0.096383	0	0	0.031584	0	0
TCONS_00124526	ENSG00000128849	CGNL1	0.200803	0.003237	0.027883	0.013975	0.005912	0.048013
TCONS_00131121	ENSG00000285253	AC090517.4	0.10543	0	0	0	0	0.014271
TCONS_00125290	ENSG00000188501	LCTL	0.076499	0	0	0	0	0
TCONS_00126317	XLOC_051322	XLOC_051322	0.028937	0	0	0	0	0
TCONS_00133378	ENSG00000080644	CHRNA3	0.111081	0.018252	0	0	0	0
TCONS_00133376	ENSG00000080644	CHRNA3	0.028685	0	0.00685	0	0	0
TCONS_00126991	ENSG00000259511	UBE2Q2L	0.038013	0	0	2.4e-05	0	0.001587
TCONS_00127533	ENSG00000196391	ZNF774	0.005099	0	0	0	0	0
TCONS_00134572	ENSG00000176463	SLCO3A1	0.014662	0	0	0	0	0
TCONS_00127999	ENSG00000140443	IGF1R	0.066169	0	0	0	0	0.035171
TCONS_00128193	XLOC_051975	XLOC_051975	0.102003	0	0	0	0	0
TCONS_00135964	ENSG00000183971	NPW	0.031066	0	0	0	0	0
TCONS_00136596	ENSG00000262621	AC025283.2	0.109948	0.003246	0	0	0	0
TCONS_00136999	ENSG00000183044	ABAT	0.055766	0	0.000691	0	0.032137	0
TCONS_00146144	XLOC_057632	XLOC_057632	0.139675	0	0	0.014544	0.012183	0
TCONS_00137572	ENSG00000166780	C16orf45	0.053547	0	0	0	0	0
TCONS_00138544	XLOC_055482	XLOC_055482	0.067212	0	0	0	0	0
TCONS_00138703	ENSG00000169180	XPO6	0.456107	0	0	0	0.08539	0.00396
TCONS_00139997	XLOC_055939	XLOC_055939	0.020637	0.007579	0	0	0	0
TCONS_00148880	ENSG00000277639	AC007906.2	0.002252	0	0	0	0	0
TCONS_00151687	XLOC_059406	XLOC_059406	0.001135	0	0	0	0	0
TCONS_00143590	ENSG00000197912	SPG7	0.050219	0.000331	0.000335	0.003818	0.006287	0.001819
TCONS_00163039	ENSG00000159842	ABR	0.612746	0	0	0	0.164959	0
TCONS_00163745	ENSG00000161929	SCIMP	0.126478	0	0.041481	0	0	0
TCONS_00153944	ENSG00000006740	ARHGAP44	0.21833	0	0	0	0	0
TCONS_00168387	ENSG00000012048	BRCA1	0.021188	0	0	0	0	0
TCONS_00159189	ENSG00000108848	LUC7L3	1.30304	0.032381	0.002206	0.006521	0.008968	0.019807
TCONS_00170417	ENSG00000136451	VEZF1	0.20601	0.00278	0.007309	0.011191	0.036082	0.011657
TCONS_00170561	ENSG00000108387	2022-09-04	0.022425	0	0	0	0	0
TCONS_00160419	ENSG00000108370	RGS9	0.148178	0	0	0	0	0
TCONS_00161075	ENSG00000180901	KCTD2	0.058522	0	0	0.00716	0	0.003428
TCONS_00161727	XLOC_062648	XLOC_062648	0.002419	0	0	0	0	0
TCONS_00172840	XLOC_066050	XLOC_066050	0.068452	0.019673	0	0	0	0
TCONS_00173525	ENSG00000182446	NPLOC4	0.069988	0	0	0	0	0
TCONS_00174594	ENSG00000101745	ANKRD12	0.033897	0	0	0	0.005458	0
TCONS_00178457	ENSG00000154864	PIEZO2	0.007352	0	0	0	0.003608	0
TCONS_00178454	ENSG00000154864	PIEZO2	0.002223	0	0	0	0	0
TCONS_00175126	XLOC_066808	XLOC_066808	0.153028	0.000187	0	0.001223	0	0
TCONS_00179576	ENSG00000075643	MOCOS	0.149617	0	0.004697	0.018346	0.040731	0.01559
TCONS_00180526	XLOC_069274	XLOC_069274	0.016152	0	0	0	0	0
TCONS_00176823	XLOC_067575	XLOC_067575	0.066232	0	0.03579	0	0	0
TCONS_00177554	XLOC_067951	XLOC_067951	0.061629	0	0	0	0	0
TCONS_00181564	XLOC_069845	XLOC_069845	0.06827	0.020556	0	0	0	0
TCONS_00195955	ENSG00000132026	RTBDN	0.056181	0	0	0	0	0
TCONS_00186336	ENSG00000256229	ZNF486	0.027563	0	0	0.006798	0.004644	0
TCONS_00198089	ENSG00000121297	TSHZ3	0.21199	0	0.02521	0	0	0
TCONS_00198092	ENSG00000121297	TSHZ3	0.009817	0	0	0.000457	0	0
TCONS_00198343	XLOC_074776	XLOC_074776	0.009664	0	0	0	0	0
TCONS_00198346	ENSG00000205209	SCGB2B2	0.142074	0.004029	0	0	0	0.078085
TCONS_00187528	ENSG00000105679	GAPDHS	0.091164	0	0	0	0	0
TCONS_00198644	ENSG00000105290	APLP1	0.003758	0	0	0	0	0
TCONS_00199644	ENSG00000105227	PRX	0.01039	0	0	0	0	0
TCONS_00188640	ENSG00000160460	SPTBN4	0.033293	0	0	0	0	0
TCONS_00189763	ENSG00000104879	CKM	0.031773	0	0	0	0	0.014507
TCONS_00190292	XLOC_072467	XLOC_072467	0.049169	0	0	0	0	0
TCONS_00192033	ENSG00000088053	GP6	0.019026	0	0.004525	0	0	0
TCONS_00191805	ENSG00000170889	RPS9	0.061064	0	0	0	0.008386	0
TCONS_00192529	ENSG00000186230	ZNF749	0.001604	0	0	0	0	0
TCONS_00204311	XLOC_076433	XLOC_076433	0.071671	0	0	0	0	0
TCONS_00204640	ENSG00000178295	GEN1	0.007885	0	0	0	0	0
TCONS_00205012	ENSG00000084676	NCOA1	0.113137	0	0	0	0.042558	0.00589
TCONS_00221199	ENSG00000243147	MRPL33	0.012051	0	0	0	0	0
TCONS_00221550	ENSG00000171055	FEZ2	0.263696	0	0.00336	0.077743	0	0
TCONS_00206276	XLOC_077233	XLOC_077233	0.042782	0	0	0	0	0
TCONS_00222537	ENSG00000115239	ASB3	0.267113	0	0	0	0	0
TCONS_00207353	ENSG00000162927	PUS10	0.07801	0	0	0	0	0.023212
TCONS_00223227	XLOC_084361	XLOC_084361	0.049791	0	0	0	0	0
TCONS_00208249	ENSG00000116127	ALMS1	0.002812	0	0	0	0	0
TCONS_00223989	XLOC_084638	XLOC_084638	0.026749	0	0.005289	0	0	0
TCONS_00208287	ENSG00000124356	STAMBP	0.161073	0	0.004448	0.064993	0.012959	0.005117
TCONS_00224145	ENSG00000114993	RTKN	0.004452	0	0.002547	0	0	0
TCONS_00208713	XLOC_078309	XLOC_078309	0.009239	0	0	0	0	0
TCONS_00224906	XLOC_084986	XLOC_084986	0.063881	0	0	0	0	0
TCONS_00225923	XLOC_085415	XLOC_085415	0.020178	0	0	0	0	0
TCONS_00211177	XLOC_079387	XLOC_079387	0.081496	0	0.021561	0	0	0
TCONS_00211578	XLOC_079557	XLOC_079557	0.037527	0	0	0	0	0
TCONS_00229151	ENSG00000123636	BAZ2B	0.438873	0	0.081205	0	0.010257	0.021877
TCONS_00213626	ENSG00000178662	CSRNP3	0.066246	0	0.027875	0	0	0
TCONS_00213624	ENSG00000178662	CSRNP3	0.016681	0	0	0	0	0
TCONS_00230261	XLOC_087447	XLOC_087447	0.100048	0	0	0	0.013128	0.011965
TCONS_00230299	XLOC_087463	XLOC_087463	0.066352	0	0.020045	0	0	0
TCONS_00214846	XLOC_080974	XLOC_080974	0.04818	0	0	0	0	0
TCONS_00214889	XLOC_081045	XLOC_081045	0.015884	0	0	0	0	0
TCONS_00230600	XLOC_087563	XLOC_087563	0.044609	0	0	0	0	0
TCONS_00230757	XLOC_087614	XLOC_087614	0.087788	0	0	0	0	0
TCONS_00215658	ENSG00000155729	KCTD18	0.002482	0	0	0	0	0
TCONS_00232446	ENSG00000115425	PECR	0.005144	0	0	0	0	0
TCONS_00216843	ENSG00000079308	TNS1	0.041805	0	0	0	0	0
TCONS_00232562	ENSG00000079308	TNS1	0.051781	0.023847	0	0	0	0
TCONS_00233026	XLOC_088606	XLOC_088606	0.113565	0	0	0	0.024904	0.01699
TCONS_00233502	ENSG00000135914	HTR2B	0.083084	0	0.008634	0	0	0.022884
TCONS_00218856	XLOC_082632	XLOC_082632	0.0885	0	0	0.015142	0	0
TCONS_00239454	XLOC_091279	XLOC_091279	0.030501	0	0	0	0	0
TCONS_00234802	XLOC_089397	XLOC_089397	0.081236	0	0	0.01049	0	0.018559
TCONS_00235292	XLOC_089641	XLOC_089641	0.01045	0	0	0	0	0
TCONS_00240161	XLOC_091640	XLOC_091640	0.056666	0	0	0.01765	0	0
TCONS_00235404	XLOC_089696	XLOC_089696	0.025093	0	0	0	0	0
TCONS_00240307	ENSG00000125864	BFSP1	0.007794	0	0	0	0	0
TCONS_00240379	XLOC_091752	XLOC_091752	0.06038	0	0.023989	0	0	0
TCONS_00241314	ENSG00000131050	BPIFA2	0.074387	0	0	0.030413	0	0
TCONS_00241515	ENSG00000198646	NCOA6	0.2076	0	0.005929	0.032907	0.004018	0
TCONS_00237790	ENSG00000124151	NCOA3	0.002973	0	0	0	0	0
TCONS_00237941	ENSG00000197818	SLC9A8	0.041853	0	0	0	0	0
TCONS_00238132	ENSG00000101096	NFATC2	0.078572	0	0	0	0	0
TCONS_00238288	ENSG00000019186	CYP24A1	0.065386	0	0	0	0	0
TCONS_00238296	ENSG00000019186	CYP24A1	0.084582	0	0	0	0	0
TCONS_00239060	XLOC_091160	XLOC_091160	0.050251	0	0	0	0	0.014659
TCONS_00244324	ENSG00000273590	SMIM11B	0.002555	0.000943	0	0	0	0
TCONS_00244907	XLOC_093875	XLOC_093875	0.353119	0	0	0	0	0
TCONS_00244947	XLOC_093896	XLOC_093896	0.038765	0.008516	0	0	0	0
TCONS_00246294	ENSG00000160194	NDUFV3	0.003947	0.001788	0	0	0	0
TCONS_00249852	XLOC_096038	XLOC_096038	0.011462	0	0	0	0	0
TCONS_00253123	XLOC_097266	XLOC_097266	0.030804	0	0	0	0	0
TCONS_00257675	ENSG00000138944	SHISAL1	0.03437	0	0	0	0	0
TCONS_00253747	ENSG00000075240	GRAMD4	0.268297	0.045376	0	0.014075	0.034005	0.022887
TCONS_00253748	ENSG00000075240	GRAMD4	0.09175	0	0.052022	0	0	0
TCONS_00270911	ENSG00000144455	SUMF1	0.088487	0	0	0	0	0
TCONS_00272026	ENSG00000183977	PP2D1	0.126356	0	0.064545	0	0	0
TCONS_00272060	XLOC_104439	XLOC_104439	0.075151	0	0.017321	0	0	0.001329
TCONS_00272841	ENSG00000008226	DLEC1	0.094324	0	0	0	0.019219	0.021923
TCONS_00273322	ENSG00000160746	ANO10	0.068884	0.000816	0	0	0	0.003277
TCONS_00261513	XLOC_100157	XLOC_100157	0.014164	0	0.002213	0	0	0
TCONS_00274712	ENSG00000088538	DOCK3	0.010118	0	0	0	0	0
TCONS_00275297	ENSG00000174844	DNAH12	0.034915	0	0	0	0	0
TCONS_00276210	ENSG00000227124	ZNF717	0.138049	0	0.005584	0	0	0.007761
TCONS_00263962	XLOC_101012	XLOC_101012	0.0393	0	0	0	0	0
TCONS_00264088	XLOC_101116	XLOC_101116	0.012082	0	0	0	0	0
TCONS_00264331	XLOC_101251	XLOC_101251	0.085146	0	0	0	0	3.2e-05
TCONS_00264370	ENSG00000064225	ST3GAL6	0.01399	0.004085	0	0	0	0
TCONS_00276870	ENSG00000154175	ABI3BP	0.007432	0	0	0	0	0
TCONS_00279339	XLOC_107381	XLOC_107381	0.042544	0	0	0	0	0
TCONS_00279361	ENSG00000073711	PPP2R3A	0.052478	0	0	0.006014	0	0
TCONS_00280309	ENSG00000174944	P2RY14	0.069185	0	0	0	0	0
TCONS_00268423	XLOC_103083	XLOC_103083	0.023566	0	0.005773	0	0	0
TCONS_00269982	XLOC_103650	XLOC_103650	0.067345	0	0	0	0	0
TCONS_00270341	ENSG00000173950	XXYLT1	0.028891	0	0.012106	0	0	0
TCONS_00292299	ENSG00000159733	ZFYVE28	0.00461	0	0	0	0	0
TCONS_00292846	XLOC_113414	XLOC_113414	0.030588	0	0	0	0.0174	0
TCONS_00284793	XLOC_109593	XLOC_109593	0.055882	0	0	0	0	0
TCONS_00293696	XLOC_113909	XLOC_113909	0.050072	0	0	0	0	0
TCONS_00293756	ENSG00000169851	PCDH7	0.137634	0	0.005535	0	0.006656	0.054706
TCONS_00294332	XLOC_114241	XLOC_114241	0.007017	0.001948	0.001522	0	0	0
TCONS_00286316	ENSG00000109265	KIAA1211	0.170747	0.029476	0	0	0	0
TCONS_00286328	ENSG00000109265	KIAA1211	0.002616	0	0	0	0	0
TCONS_00286859	XLOC_110635	XLOC_110635	0.000475	0	0	0	0	0
TCONS_00295672	XLOC_114887	XLOC_114887	0.108166	0	0	0	0	0
TCONS_00288523	ENSG00000170522	ELOVL6	0.033209	0	0	0	0	0
TCONS_00289612	ENSG00000153130	SCOC	0.578455	0	0	0	0	0
TCONS_00290469	XLOC_112276	XLOC_112276	0.083072	0	0.032201	0	0	0
TCONS_00290863	XLOC_112452	XLOC_112452	0.051248	0	0	0	0	0
TCONS_00291429	ENSG00000218336	TENM3	0.02387	0	0.004859	0	0	0
TCONS_00291850	XLOC_113028	XLOC_113028	0.02461	0	0	0	0	0
TCONS_00311555	ENSG00000066230	SLC9A3	0.02894	0	0	0	0.000442	0
TCONS_00300587	XLOC_117112	XLOC_117112	0.021443	0	0	0	0	0
TCONS_00301723	XLOC_117701	XLOC_117701	0.090222	0	0	0	0	0
TCONS_00302432	ENSG00000112964	GHR	0.007717	0	0	0	0	0
TCONS_00313959	XLOC_123347	XLOC_123347	0.002925	0	0	0	0	0
TCONS_00303102	XLOC_118448	XLOC_118448	0.007915	0	0	0	0	0
TCONS_00314426	XLOC_123611	XLOC_123611	0.020396	0	0	0	0	0
TCONS_00303273	XLOC_118562	XLOC_118562	0.008785	0	0	0	0	0
TCONS_00314835	XLOC_123805	XLOC_123805	0.024935	0	0.006105	0	0	0
TCONS_00304143	XLOC_118890	XLOC_118890	0.054206	0	0.0006	0.017174	0	0
TCONS_00304146	XLOC_118892	XLOC_118892	0.018707	0	0	0	0	0
TCONS_00304549	ENSG00000284762	AC022414.1	0.010266	0	0	0	0	0
TCONS_00304923	ENSG00000152348	ATG10	0.135224	0.008836	0.009404	0	0.006873	0.051921
TCONS_00305000	XLOC_119255	XLOC_119255	0.030463	0	0	0	0	0
TCONS_00316782	XLOC_124749	XLOC_124749	0.067635	0.00937	0	0	0	0
TCONS_00306452	XLOC_120030	XLOC_120030	0.094461	0	0	0.014018	0.014066	0
TCONS_00306802	ENSG00000250803	AC010255.3	0.025918	0	0	0	0	0
TCONS_00307205	XLOC_120416	XLOC_120416	0.17843	0.022169	0.008233	0	0	0.032881
TCONS_00307256	ENSG00000158985	CDC42SE2	0.601303	0.062243	0.075867	0.001972	0.205971	0.004811
TCONS_00307334	ENSG00000283782	AC116366.3	0.006018	0	0	0	0	0
TCONS_00308582	ENSG00000113578	FGF1	0.011506	0	0	0	0	0
TCONS_00319560	XLOC_126088	XLOC_126088	0.023424	0	0	0	0	0
TCONS_00309374	ENSG00000155506	LARP1	0.005101	0	0	0	0	0
TCONS_00320881	ENSG00000145934	TENM2	0.073249	0	0	0	0	0.023757
TCONS_00320909	XLOC_126732	XLOC_126732	0.077757	0	0	0	0	0
TCONS_00321281	XLOC_126940	XLOC_126940	0.026578	0.006911	0	0	0	0
TCONS_00322250	ENSG00000146054	TRIM7	0.040266	0	0	0	0	0
TCONS_00333145	ENSG00000112685	EXOC2	0.00117	0	0	0.000431	0	0
TCONS_00323046	XLOC_127595	XLOC_127595	0.076991	0	0	0	0	0
TCONS_00323073	ENSG00000137203	TFAP2A	0.080797	0	0	0	0	0.035369
TCONS_00323525	XLOC_127867	XLOC_127867	0.075105	0	0	0	0	0
TCONS_00323815	XLOC_128030	XLOC_128030	0.06879	0	0	0	0	0
TCONS_00324419	ENSG00000196812	ZSCAN16	0.026829	0	0	0	0	0
TCONS_00335049	ENSG00000235109	ZSCAN31	0.074444	0	0	0	0	0
TCONS_00336332	ENSG00000161896	IP6K3	0.008684	0	0	0	0	0
TCONS_00336487	XLOC_134122	XLOC_134122	0.089796	0	0	0.013356	0.026803	0
TCONS_00326140	XLOC_128902	XLOC_128902	0.040201	0	0	0	0	0.015067
TCONS_00337834	XLOC_134728	XLOC_134728	0.010119	0	0	0	0	0
TCONS_00327575	ENSG00000188107	EYS	0.059735	0	0	0	0	0.028283
TCONS_00338631	ENSG00000269964	MEI4	0.091619	0	0	0	0	0
TCONS_00338505	ENSG00000112695	COX7A2	3.04365	0.064163	0.037882	0.048959	0.015017	0.041839
TCONS_00339811	XLOC_135819	XLOC_135819	0.015947	0	0	0	0	0
TCONS_00340286	XLOC_136064	XLOC_136064	0.004108	0	0	0	0	0
TCONS_00340697	ENSG00000249853	HS3ST5	0.354756	0.059189	0.018034	0	0	0.005628
TCONS_00331438	XLOC_131787	XLOC_131787	0.086957	0	0	0	0	0
TCONS_00342300	XLOC_136999	XLOC_136999	0.115671	0	0	0	0.039538	0.005532
TCONS_00342392	XLOC_137047	XLOC_137047	0.117542	0	0	0	0.023123	0
TCONS_00343062	ENSG00000164674	SYTL3	0.093223	0	0	0	0	0
TCONS_00343342	ENSG00000112541	PDE10A	0.01481	0	0	0	0	0
TCONS_00343593	ENSG00000184465	WDR27	0.115823	0	0.022039	0.011714	0.003452	0.027004
TCONS_00344170	XLOC_137828	XLOC_137828	0.095678	0	0	0.027535	0	0
TCONS_00344120	ENSG00000146555	SDK1	0.091676	0.0084	0.003727	0	0.003763	0.01718
TCONS_00345280	XLOC_138276	XLOC_138276	0.077502	0	0	0	0	0
TCONS_00345577	ENSG00000106086	PLEKHA8	0.192985	0	0.03345	0.002456	0	0.039486
TCONS_00346235	XLOC_138651	XLOC_138651	0.074568	0.020182	0	0	0	0
TCONS_00346252	XLOC_138664	XLOC_138664	0.049042	0	0	0	0	0
TCONS_00346192	ENSG00000175600	SUGCT	0.007801	0.001733	0	0	0	0
TCONS_00346294	ENSG00000002746	HECW1	0.09344	0	0	0	0	0
TCONS_00346443	ENSG00000015676	NUDCD3	0.028001	0	0	0	0	0
TCONS_00346741	XLOC_138896	XLOC_138896	0.077194	0	0.024413	0	0	0
TCONS_00356846	ENSG00000158683	PKD1L1	0.00308	0	0	0	0	0
TCONS_00356848	ENSG00000158683	PKD1L1	0.074451	0	0	0	0	0
TCONS_00347257	ENSG00000196247	ZNF107	0.135677	0	0	0	0	0
TCONS_00347309	XLOC_139232	XLOC_139232	0.083596	0.020771	0	0	0	0
TCONS_00360908	ENSG00000184903	IMMP2L	0.002362	0	0	0	0	0
TCONS_00350810	ENSG00000128573	FOXP2	0.017579	0	0	0	0	0
TCONS_00361310	XLOC_144758	XLOC_144758	0.021026	0	0.003805	0	0	0.004789
TCONS_00361355	ENSG00000081803	CADPS2	0.034964	0	0	0	0	0
TCONS_00361649	ENSG00000128591	FLNC	22.9952	0.417236	0.341778	0.019392	0.022469	9.82983
TCONS_00361981	XLOC_145053	XLOC_145053	0.105058	0	0.027831	0	0	0
TCONS_00351977	ENSG00000122786	CALD1	0.059244	0	0	0	0	0
TCONS_00362181	ENSG00000157680	DGKI	0.073811	0	0.002764	9.1e-05	0	0
TCONS_00352475	ENSG00000006530	AGK	0.011184	0	0	0	0	0
TCONS_00371834	ENSG00000104714	ERICH1	0.094755	0	0	0	0	0
TCONS_00364074	XLOC_145981	XLOC_145981	0.078008	0	0	0	0	0.019208
TCONS_00364394	ENSG00000226430	USP17L7	0.018388	0	0	0	0	0
TCONS_00372510	ENSG00000164741	DLC1	0.105116	0.001008	0.003992	0.006162	0	0.002608
TCONS_00364594	ENSG00000129422	MTUS1	0.002744	0	0	0	0	0
TCONS_00364679	XLOC_146199	XLOC_146199	0.051615	0	0	0	0	0.017097
TCONS_00365086	ENSG00000284956	AC107959.5	0.092058	0	0	5.6e-05	0	0.039351
TCONS_00373477	ENSG00000197892	KIF13B	0.015293	0	0	0	0	0.008745
TCONS_00373566	ENSG00000157110	RBPMS	0.008497	0	0	0	0	0
TCONS_00374412	ENSG00000120925	RNF170	0.067595	0	0	0	0	0
TCONS_00367711	XLOC_147497	XLOC_147497	0.116784	0	0	0	0.028293	0
TCONS_00375938	ENSG00000091656	ZFHX4	0.232159	0.042339	0.010567	0.034917	0.015082	0.022139
TCONS_00368502	ENSG00000123124	WWP1	0.080398	0	0	0	0	0
TCONS_00369666	XLOC_148483	XLOC_148483	0.076244	0	0	0	0	0
TCONS_00378085	XLOC_152440	XLOC_152440	0.003923	0	0	0	0	0
TCONS_00378331	ENSG00000177570	SAMD12	0.109889	0	0	0.002339	0.000997	0
TCONS_00370057	ENSG00000155792	DEPTOR	0.038834	0	0	0	0.00057	0
TCONS_00378648	ENSG00000156802	ATAD2	0.061027	0	0	0	0	0
TCONS_00380520	XLOC_153349	XLOC_153349	0.148509	0.001825	0	0	0	0
TCONS_00389360	XLOC_157430	XLOC_157430	0.066352	0.035209	0	0	0	0
TCONS_00389401	ENSG00000099219	ERMP1	0.020376	0	0	0	0	0
TCONS_00389447	XLOC_157477	XLOC_157477	0.047534	0	0	0	0	0.01947
TCONS_00390307	ENSG00000174482	LINGO2	0.00272	0	0	0	0	0
TCONS_00390471	XLOC_158095	XLOC_158095	0.09659	0	0	0	7.8e-05	0.045138
TCONS_00390512	XLOC_158095	XLOC_158095	0.130973	0	0	0.018545	0.013762	0.006941
TCONS_00382150	XLOC_154292	XLOC_154292	0.066117	0.014848	0.003373	0	0	0
TCONS_00391452	ENSG00000283486	FAM95C	0.002439	0	0	0	0	0
TCONS_00392094	ENSG00000107282	APBA1	0.072522	0	0	0	0	0
TCONS_00392572	XLOC_159217	XLOC_159217	0.026909	0	0	0	0	0.005608
TCONS_00384475	XLOC_155457	XLOC_155457	0.016286	0	0	0	0	0
TCONS_00384594	XLOC_155518	XLOC_155518	0.203776	0.026241	0	0	0	0
TCONS_00384875	ENSG00000158079	PTPDC1	0.288287	0	0	0	0	0
TCONS_00384874	ENSG00000158079	PTPDC1	0.236475	0	0.001295	0	0.003397	0
TCONS_00394336	XLOC_160074	XLOC_160074	0.115741	0	0	0	0	0
TCONS_00386912	ENSG00000136828	RALGPS1	0.073561	0.008911	0.004061	0	0.014187	0
TCONS_00396139	XLOC_160899	XLOC_160899	0.015315	0	0	0	0	0
TCONS_00388794	ENSG00000188747	NOXA1	0.099389	0	0.039094	0	0	0
TCONS_00397532	XLOC_161396	XLOC_161396	0.075368	0	0	0	0	0
TCONS_00397798	XLOC_161554	XLOC_161554	0.034593	0	0	0	0	0
TCONS_00405232	XLOC_165208	XLOC_165208	0.127234	0.021517	0	0	0	0.006832
TCONS_00405267	ENSG00000086712	TXLNG	0.000677	0	0	0	0	0
TCONS_00399227	ENSG00000147050	KDM6A	0.000546	0	0	0	0	0
TCONS_00400150	ENSG00000232593	KANTR	0.179498	0	0	0	0	0
TCONS_00409644	XLOC_167505	XLOC_167505	0.093957	0	0	0	0	0
TCONS_00410110	XLOC_167766	XLOC_167766	0.016001	0	0	0	0	0
TCONS_00403189	ENSG00000156500	FAM122C	0.032638	0	0	0	0	0
TCONS_00410826	XLOC_168199	XLOC_168199	0.076872	0	0	0	0	0
TCONS_00412061	XLOC_168774	XLOC_168774	0.00766	0	0	0	0	0
TCONS_00000803	XLOC_000608	XLOC_000608	1.40263	0	0	0	0	0
TCONS_00000820	XLOC_000608	XLOC_000608	15.0807	0	0	0	0	0
TCONS_00000827	XLOC_000609	XLOC_000609	481.602	70.8604	0	0	45.128	8.23711
TCONS_00000859	XLOC_000616	XLOC_000616	2.85455	0.085276	0	0	0	0
TCONS_00000831	XLOC_000608	XLOC_000608	735.526	8.14971	0.143927	0	0	0
TCONS_00000834	XLOC_000608	XLOC_000608	41.9025	0	0	0	0	0
TCONS_00000818	XLOC_000608	XLOC_000608	462.662	0	4.47703	6.34121	12.5345	7.07799
TCONS_00000815	XLOC_000608	XLOC_000608	24.0858	1.70531	0	0	0	4.59463
TCONS_00000833	XLOC_000608	XLOC_000608	7.24943	0.004728	0.002367	0	0	0.020047
TCONS_00000861	XLOC_000615	XLOC_000615	1.96484	0.004103	0.0103	0.017774	0.003618	0.012341
TCONS_00000858	XLOC_000616	XLOC_000616	137.412	9.1261	0.007987	7.99351	0.001399	0.007361
TCONS_00000245	XLOC_000164	XLOC_000164	0.009859	0	0	0	0	0
TCONS_00000644	XLOC_000464	XLOC_000464	0.077288	0	0	0	0	0
TCONS_00000643	XLOC_000464	XLOC_000464	0.070971	0	0	0	0	0
TCONS_00000308	XLOC_000209	XLOC_000209	2.36407	0.366768	0.260445	0.134937	0.066525	0.030986
TCONS_00000307	XLOC_000209	XLOC_000209	3504.4	156.456	96.0355	77.7495	34.2097	0
TCONS_00000312	XLOC_000209	XLOC_000209	2171.17	184.545	272.198	9.55008	7.73783	4.32363
TCONS_00000315	XLOC_000210	XLOC_000210	272.966	32.0425	55.5309	34.9521	10.1136	15.0659
TCONS_00000332	XLOC_000222	XLOC_000222	164.467	13.6817	25.0195	17.6213	3.89162	7.92424
TCONS_00022883	XLOC_009273	XLOC_009273	0.066671	0	0	0.020237	0	0
TCONS_00024161	XLOC_009762	XLOC_009762	0.083233	0	0	0	0	0
TCONS_00019670	XLOC_008064	XLOC_008064	0.014441	0.002908	0	0	0	0
TCONS_00038627	XLOC_015810	XLOC_015810	0.080695	0	0	0	0	0
TCONS_00048433	XLOC_020311	XLOC_020311	0.071468	0	0	0	0	0
TCONS_00055600	XLOC_023489	XLOC_023489	0.012103	0	0	0	0	0
TCONS_00069040	XLOC_028375	XLOC_028375	0.007199	0	0	0	0	0
TCONS_00064133	XLOC_026649	XLOC_026649	0.079637	0	0	0	0	0
TCONS_00094647	XLOC_037854	XLOC_037854	0.017933	0	0	0	0	0
TCONS_00087166	XLOC_035239	XLOC_035239	0.065778	0	0	0	0	0
TCONS_00099333	XLOC_039730	XLOC_039730	0.057331	0	0	0	0	0
TCONS_00106371	XLOC_043102	XLOC_043102	0.081818	0	0	0	0	0.01986
TCONS_00102279	XLOC_041188	XLOC_041188	0.041346	0	0.014897	0	0	0
TCONS_00103313	XLOC_041719	XLOC_041719	0.094552	0	0	0	0	0
TCONS_00107865	XLOC_044132	XLOC_044132	0.010002	0	0	0	0	0
TCONS_00116501	XLOC_047290	XLOC_047290	0.013143	0	0	0	0	0
TCONS_00111305	XLOC_045524	XLOC_045524	0.07669	0	0	0	0	0
TCONS_00111531	XLOC_045604	XLOC_045604	0.015541	0.00628	0	0	0	0
TCONS_00120730	XLOC_049157	XLOC_049157	0.015572	0	0	0	0	0
TCONS_00158863	XLOC_061702	XLOC_061702	0.017622	0	0	0	0	0
TCONS_00159345	XLOC_061831	XLOC_061831	0.058048	0	0	0	0	0
TCONS_00175133	XLOC_066812	XLOC_066812	0.069729	0	0	0	0	0
TCONS_00180030	ENSG00000101638	ST8SIA5	0.024856	0	0	0	0	0
TCONS_00177522	XLOC_067927	XLOC_067927	0.068815	0	0	0	0	0
TCONS_00182377	XLOC_070082	XLOC_070082	0.003109	0	0	0	0	0
TCONS_00221994	XLOC_083854	XLOC_083854	0.074334	0	0	0	0	0
TCONS_00222476	XLOC_084060	XLOC_084060	0.087548	0	0	0	0	0
TCONS_00208764	XLOC_078357	XLOC_078357	0.078526	0	0	0	0	0
TCONS_00211990	XLOC_079776	XLOC_079776	0.014618	0	0	0	0	0
TCONS_00231041	XLOC_087837	XLOC_087837	0.076578	0.021725	0	0	0	0
TCONS_00233392	XLOC_088819	XLOC_088819	0.052095	0	0	0	0	0
TCONS_00218480	XLOC_082482	XLOC_082482	0.012374	0	0	0	0	0
TCONS_00241046	XLOC_092072	XLOC_092072	0.107736	0.020061	0	0	0	0
TCONS_00249767	XLOC_095967	XLOC_095967	0.022619	0	0	0	0	0
TCONS_00251304	ENSG00000100122	CRYBB1	0.039556	0	0	0	0	0
TCONS_00276752	XLOC_106221	XLOC_106221	0.0181	0	0	0	0	0
TCONS_00265402	XLOC_101748	XLOC_101748	0.085645	0	0	0	0	0
TCONS_00265834	XLOC_101910	XLOC_101910	0.036563	0	0	0	0	0
TCONS_00265953	XLOC_101984	XLOC_101984	0.038936	0	0	0	0	0
TCONS_00266680	XLOC_102265	XLOC_102265	0.030588	0	0	0	0	0
TCONS_00267471	XLOC_102652	XLOC_102652	0.027286	0	0	0	0	0
TCONS_00293658	XLOC_113885	XLOC_113885	0.051935	0	0	0	0	0
TCONS_00305110	XLOC_119333	XLOC_119333	0.013663	0	0	0	0	0
TCONS_00317039	XLOC_124910	XLOC_124910	0.034258	0.018088	0	0	0	0
TCONS_00322729	XLOC_127477	XLOC_127477	0.114013	0	0	0.019033	0	0
TCONS_00323384	XLOC_127768	XLOC_127768	0.015507	0	0	0	0	0
TCONS_00339121	XLOC_135423	XLOC_135423	0.166936	0	0	0	0.044463	0.016663
TCONS_00366556	XLOC_146905	XLOC_146905	0.028717	0	0	0	0	0
TCONS_00375320	XLOC_151056	XLOC_151056	0.024303	0	0	0	0	0
TCONS_00376175	XLOC_151513	XLOC_151513	0.016953	0	0	0	0	0
TCONS_00368985	XLOC_148163	XLOC_148163	0.014585	0	0	0	0	0
TCONS_00371104	XLOC_149222	XLOC_149222	0.047371	0	0	0	0	0
TCONS_00381173	XLOC_153662	XLOC_153662	0.010157	0	0	0	0	0
TCONS_00381351	XLOC_153777	XLOC_153777	0.028394	0	0	0	0	0
TCONS_00391587	XLOC_158610	XLOC_158610	0.025676	0	0	0	0	0
TCONS_00385688	XLOC_156070	XLOC_156070	0.01004	0	0	0	0	0
TCONS_00394497	XLOC_160228	XLOC_160228	0.10872	0	0	0	0	0
TCONS_00397782	XLOC_161544	XLOC_161544	0.065936	0	0	0	0	0
TCONS_00399419	XLOC_162343	XLOC_162343	0.015037	0	0	0	0	0
TCONS_00409252	XLOC_167267	XLOC_167267	0.075078	0	0	0	0	0
TCONS_00000150	XLOC_000104	XLOC_000104	0.072621	0	0	0	0	0

## Sheet: lncRNA_No UV_cluster 2
transcript_id	gene_id	gene_name	C_0	C_3	C_6	C_9	C_12	C_24
ENST00000333854	ENSG00000182873	PRKCZ-AS1	0	0.039754	0.005301	0	0	0
ENST00000442636	ENSG00000230679	ENO1-AS1	0.000316	0.037135	0.000742	0.000339	0.000433	0.002138
ENST00000650448	ENSG00000285646	AL021155.2	0.027703	2.28293	0	0	0	0
ENST00000633763	ENSG00000282143	AL137798.2	0	0.000543	0	0	0	0
ENST00000652371	ENSG00000286061	RCAN3AS	0	0.007878	0	0	0	0
ENST00000635044	ENSG00000223382	LINC01778	0	0.057009	0	0	0	0
ENST00000635288	ENSG00000223382	LINC01778	0	0.065759	0	0	0	0
ENST00000447478	ENSG00000228634	AL136115.1	0	0.028034	0	0	0	0
ENST00000443161	ENSG00000228436	AL139260.1	0	0.001126	3e-06	0	0	0
ENST00000431759	ENSG00000227533	SLC2A1-AS1	2e-06	4.3e-05	0	0	0	2e-06
ENST00000623663	ENSG00000280425	AL357673.2	0	0.001674	0	0	0	0
ENST00000453229	ENSG00000235545	AC103923.1	0	0.006061	0	0	0	0
ENST00000643361	ENSG00000285407	AL033530.1	0	4.1e-05	0	0	0	0
ENST00000650170	ENSG00000285928	AC103591.4	0	0.000309	0	0	0	0
ENST00000526694	ENSG00000231999	LRRC8C-DT	0	0.001532	0	0	0	0
ENST00000413103	ENSG00000226835	AC097059.1	0	0.008389	0	0	0	0
ENST00000624604	ENSG00000228852	AC092802.2	0	0.01561	0	0.00546	0	0
ENST00000648946	ENSG00000285525	AC099670.3	0	0.044113	0.008435	0	0	0
ENST00000432294	ENSG00000241073	AC093019.2	0	0.006428	0	0	0	0
ENST00000627431	ENSG00000226419	SLC16A1-AS1	0	0.015457	0	0.006322	0	0
ENST00000457719	ENSG00000227712	AL359915.1	0	0.013346	0	0	0	0
ENST00000648930	ENSG00000285651	AL450992.2	0	0.002977	0	0	0	0
ENST00000457548	ENSG00000227045	AL589765.1	0	0.035744	0	0	0	0
ENST00000415726	ENSG00000224276	AL355388.1	0	0.031124	0	0	0	0
ENST00000528689	ENSG00000232995	AL592435.1	0	0.001421	0	0	0	0
ENST00000521244	ENSG00000213057	C1orf220	0	0.003748	0	0	0.001426	0
ENST00000419983	ENSG00000227373	AL121983.2	0	0.012595	0	0	0	0
ENST00000648175	ENSG00000236719	OVAAL	0	0.035379	0.005588	0	0	0.006429
ENST00000420807	ENSG00000232077	LINC01031	0	0.041976	0	0.012767	0	0
ENST00000412162	ENSG00000229989	MIR181A1HG	0	0.043076	0	0.000555	0	0.010401
ENST00000425295	ENSG00000228288	PCAT6	0	0.036245	0	0	0	0
ENST00000425896	ENSG00000226780	AC244035.1	0	0.01305	0	0	0	0
ENST00000443448	ENSG00000226251	LINC02608	0	0.004444	0	0	0	0
ENST00000442146	ENSG00000234915	AL360091.3	0	0.032472	0	0	0	0
ENST00000420867	ENSG00000236292	AC138024.1	0	0.001071	0	0	0	0
ENST00000439440	ENSG00000228106	AL392172.1	0	0.004968	0	0	0	0
ENST00000428148	ENSG00000226349	AC099066.1	0	0.015647	0	0	0	0
ENST00000337335	ENSG00000162913	OBSCN-AS1	0	0.003429	0	0	0	0
ENST00000366713	ENSG00000203684	IBA57-DT	0	0.008725	0	0.002657	0.00102	0
ENST00000412344	ENSG00000244137	AL512328.1	0	0.00762	0	0	0	0
ENST00000450783	ENSG00000233461	AL445524.1	0	0.056006	0.009426	0	0	0
ENST00000437601	ENSG00000227630	LINC01132	0	0.016145	0	0	0	0
ENST00000423175	ENSG00000238005	AL391832.2	0	0.071333	0	0	0	0
ENST00000417805	ENSG00000228044	AL160408.1	0	0.002451	0	0	0	0
ENST00000450451	ENSG00000237250	AL359924.1	0	0.001746	0	0	0	0
ENST00000649127	ENSG00000215808	LINC01139	0	0.25108	0	0	0	0
ENST00000454321	ENSG00000232807	AL137186.2	0	0.021766	0	0	0	0
ENST00000648093	ENSG00000238266	LINC00707	0	0.024475	0	0	9.6e-05	0
ENST00000458727	ENSG00000197308	GATA3-AS1	0	0.045661	0	0	0	0
ENST00000446193	ENSG00000229751	AC044781.1	0	0.005646	0	0	0	0
ENST00000607455	ENSG00000237036	ZEB1-AS1	0.015012	0.054602	0	0	0	0
ENST00000415731	ENSG00000227253	AL158834.2	0	0.013778	0	0	0	0
ENST00000618306	ENSG00000276850	AC245041.2	0	0.0233	0	0.004628	0	0.000732
ENST00000428346	ENSG00000235356	AL592466.1	0	0.018959	0	0	0	0
ENST00000598092	ENSG00000228065	LINC01515	0.016587	0.049816	0	0	0	0
ENST00000601888	ENSG00000228065	LINC01515	0	0.019946	0.000247	0	0	0
ENST00000626907	ENSG00000228065	LINC01515	0	0.010133	0	0	0	0
ENST00000418818	ENSG00000270087	AC010997.3	0	0.004547	0	0	0	0.00017
ENST00000427093	ENSG00000227695	DNMBP-AS1	0	0.01045	0	0	0	0
ENST00000444359	ENSG00000227492	AL138921.1	0	0.004278	0	0	0	0
ENST00000453753	ENSG00000235470	NEURL1-AS1	0	0.010962	0	0	0	0
ENST00000595446	ENSG00000231104	AC022395.1	0	0.010654	0	0	0	0
ENST00000649237	ENSG00000285973	AC063960.2	0	0.006202	0	0	0	0
ENST00000650300	ENSG00000285955	BX842242.1	0	0.006476	0	0	0	0
ENST00000616367	ENSG00000277371	RF00017	0	0.029505	0	0	0	0
ENST00000490765	ENSG00000180066	C10orf91	0	0.015308	0	0	0	0
ENST00000508004	ENSG00000251661	AC136475.1	0	0.001047	0	0	0	0
ENST00000527113	ENSG00000254815	AP006284.1	0	0.001163	0	0	0	0
ENST00000532541	ENSG00000251381	LINC00958	0	0.03098	0	0	0	0
ENST00000534165	ENSG00000255542	AC090625.2	0	0.016009	0	0	0	0
ENST00000528366	ENSG00000255521	AL356215.1	0	0.033905	0.00567	0	0	0
ENST00000532943	ENSG00000255197	AC090559.1	0	0.01486	0.000402	0	0	0
ENST00000534856	ENSG00000255931	AP003108.1	0	0.009913	0.001073	0	0	0
ENST00000543624	ENSG00000257002	AP000438.1	0	0.011109	0	0	0	0
ENST00000582123	ENSG00000264519	RN7SL596P	0	0.030431	0	0	0	0
ENST00000533740	ENSG00000254460	AP002815.1	0	0.012845	0	0	0	0
ENST00000524768	ENSG00000254826	AP001922.3	0	0.009882	0	0	0	0
ENST00000525580	ENSG00000255507	UVRAG-DT	0	0.025763	0	0	0	0
ENST00000649399	ENSG00000285835	AP000676.5	0	0.003844	0	0	0	0
ENST00000534864	ENSG00000245552	AP000787.1	0	0.002554	0	0	0	0
ENST00000545216	ENSG00000245552	AP000787.1	0	0.007531	0	0	0	0
ENST00000525984	ENSG00000255484	AP003063.2	0	0.011969	0	0	0	0
ENST00000649590	ENSG00000285909	AP002762.1	0	0.001275	0	0	0	0
ENST00000569238	ENSG00000260209	AP000842.3	0	0.007704	0	0	0	0
ENST00000539348	ENSG00000226091	LINC00937	0	0.084933	0	0	0	0
ENST00000545258	ENSG00000255882	AC091814.1	0	0.011264	0	0	0	0
ENST00000542078	ENSG00000247498	GPRC5D-AS1	0	0.019225	0	0	0	0
ENST00000318426	ENSG00000180861	LINC01559	0	0.007042	0	0	0	0
ENST00000501178	ENSG00000214772	AC010168.1	0	0.021318	0	0	0	0
ENST00000473753	ENSG00000247934	AC022364.1	1.3e-05	0.00464	5.4e-05	2.1e-05	1.9e-05	3e-05
ENST00000551894	ENSG00000257137	C12orf80	0	0.019858	0	0	0	0
ENST00000515617	ENSG00000248265	AC023794.1	0	0.001993	0	0	0	0
ENST00000551846	ENSG00000257449	AC034102.3	0	0.014052	0	0	0	0
ENST00000547552	ENSG00000258001	AC126614.1	0	0.036515	0	0	0	0
ENST00000546601	ENSG00000257761	AC078860.1	0	0.006554	0	0	0	0
ENST00000548890	ENSG00000257252	AC124947.1	0	0.074338	0	0.031786	0	0
ENST00000501499	ENSG00000245017	LINC02453	0	0.072243	0	0.00605	0.016438	0.005559
ENST00000331096	ENSG00000185847	LINC01405	0	0.021689	0	0	0	0
ENST00000542314	ENSG00000255857	PXN-AS1	4.6e-05	0.000592	2e-05	7e-06	3.8e-05	0.000139
ENST00000429892	ENSG00000212694	LINC01089	0	0.131553	0	0	0	0
ENST00000538335	ENSG00000212694	LINC01089	0	0.06993	0	0	0	0
ENST00000535614	ENSG00000212694	LINC01089	0	0.074382	0	0	0	0
ENST00000535022	ENSG00000256001	AC079949.1	0.023373	0.079506	0	0	0	0
ENST00000540739	ENSG00000249196	TMEM132D-AS1	0	0.054425	0	0	0	0
ENST00000544036	ENSG00000256137	AC117373.1	0	0.004953	0	0	0	0
ENST00000502221	ENSG00000251536	AC055717.1	0	0.003625	0	0	0	0
ENST00000606110	ENSG00000271963	AC026786.2	0	0.003608	0	0	0	0
ENST00000424075	ENSG00000236617	AC127070.1	0	0.015052	0	0	0	0
ENST00000482473	ENSG00000242381	RN7SL741P	0	0.000768	0	0	0	0
ENST00000585599	ENSG00000237001	WASF3-AS1	0	0.009297	0	0	0	0
ENST00000421190	ENSG00000230731	AL589745.1	0	0.002979	0	0	0	0
ENST00000651713	ENSG00000231607	DLEU2	0	5e-06	0	0	0	0
ENST00000601572	ENSG00000236778	INTS6-AS1	0	6.7e-05	0	0	0	0
ENST00000629479	ENSG00000224356	AL356966.1	0	0.004334	0	0	0	0
ENST00000618966	ENSG00000275216	AL161431.1	0.004429	0.77867	0.008795	0.025061	0.057658	0.048149
ENST00000609661	ENSG00000229373	LINC00452	7.3e-05	0.005686	0	0	0	0
ENST00000446989	ENSG00000229723	LINC01054	0	0.064751	0	0	0	0
ENST00000557232	ENSG00000259054	LINC02332	0	0.00592	0	0	0	0
ENST00000557019	ENSG00000259070	LINC00639	0	0.024601	0	0	0	0
ENST00000651539	ENSG00000286099	AL390800.1	0	0.001719	0	0	0	0
ENST00000555442	ENSG00000258616	LINC02303	0	0.060509	0	0	0.006976	0
ENST00000556479	ENSG00000258479	LINC00640	0.010483	0.192736	0.013329	0.025212	0.015397	0.003039
ENST00000556361	ENSG00000258561	AL359232.1	0	0.005753	0	0	0	0
ENST00000555377	ENSG00000258561	AL359232.1	0	0.21459	0.010785	0	0	0
ENST00000553633	ENSG00000259118	AL139022.1	0	0.001517	3.6e-05	0	0	0
ENST00000622466	ENSG00000276063	AL391262.1	0	0.016843	0	0.004939	0	0
ENST00000553470	ENSG00000259065	AC005520.2	0.003378	0.060934	0.00026	0.008143	1e-06	0.003453
ENST00000554759	ENSG00000258662	AC022469.2	0	0.009525	0	0	0	0
ENST00000563574	ENSG00000260810	AL135818.2	0.011176	0.035249	0	0	0	0
ENST00000565058	ENSG00000260711	AL121839.2	0	0.000599	0	0	0	0
ENST00000554161	ENSG00000258572	AL133467.1	0	0.016729	0	0	0	0
ENST00000567527	ENSG00000261069	AC124312.3	3e-06	0.000334	2e-06	2e-06	1e-06	1e-06
ENST00000559509	ENSG00000259460	AC078909.1	0.011807	0.107105	0	0.021892	0	0.008182
ENST00000560484	ENSG00000259345	AC013652.1	0.005599	0.023889	0	0.003042	0	0
ENST00000558209	ENSG00000259345	AC013652.1	0	0.008174	0	0	0	0
ENST00000558277	ENSG00000259345	AC013652.1	0	0.005273	0	0	0	0
ENST00000559030	ENSG00000259198	AC020658.2	0	0.00207	0	0	0	0
ENST00000558421	ENSG00000259368	AC013356.4	0	0.049115	0	0	0	0.020396
ENST00000366384	ENSG00000203573	RF00017	0	0.073712	0	0	0	0
ENST00000648591	ENSG00000244879	GABPB1-AS1	0	0.06363	0	0	0	0
ENST00000613737	ENSG00000277229	AC084781.1	0	0.025325	0	0	0	0
ENST00000642740	ENSG00000259564	AC009554.1	0	0.012226	0	0	0	0
ENST00000557828	ENSG00000259624	AC009269.3	0	0.009392	0	0	0	0
ENST00000558269	ENSG00000259504	AC026992.1	0	0.00816	0	0	0	0
ENST00000558454	ENSG00000259504	AC026992.1	0	0.007346	0	0	0	0
ENST00000561316	ENSG00000259309	AC021818.1	0	0.00071	0	0	0	0
ENST00000567286	ENSG00000247240	UBL7-AS1	0.000732	0.008676	0	0	6.1e-05	0
ENST00000561201	ENSG00000259218	LINC00928	0	0.004251	0	0	0	0
ENST00000554318	ENSG00000258631	AC110023.1	0	0.008568	0	0	0	0
ENST00000559531	ENSG00000259736	CRTC3-AS1	0	0.050123	0	0	0	0.010692
ENST00000561121	ENSG00000259478	AC024651.1	0	0.002422	0	0	0	0
ENST00000612923	ENSG00000278146	AC012409.4	0	0.001448	0	0	0	0
ENST00000567515	ENSG00000260107	AC005606.1	0	0.009154	0	0	0	0
ENST00000576490	ENSG00000263072	ZNF213-AS1	0	0.018873	0	0	0	0
ENST00000382225	ENSG00000205890	AC108134.1	0.000728	0.010031	0.001163	0	0	0
ENST00000572479	ENSG00000263257	AC040173.1	0	0.029141	0	0	0	0
ENST00000492268	ENSG00000242430	RN7SL274P	0	0.007851	0	0	0	0
ENST00000566098	ENSG00000260905	AC009021.1	0.003362	0.027778	0	0.001394	0	0
ENST00000562769	ENSG00000261122	LINC02167	0	0.006584	0	0	0	0
ENST00000447610	ENSG00000275909	RF00017	0	0.023113	0	0	0	0
ENST00000564705	ENSG00000260281	ITFG1-AS1	0.00271	0.032868	0	0	0	0
ENST00000564801	ENSG00000261630	AC007496.2	0	0.030422	0.013217	0	0	0
ENST00000569580	ENSG00000260927	AC009107.2	0.005371	0.078929	0.007187	0	0	0.006644
ENST00000562322	ENSG00000260186	LINC02137	0	0.027627	0	0	0.003771	0
ENST00000567261	ENSG00000261320	AC009061.1	0	0.007305	0	0	0	0
ENST00000577171	ENSG00000261227	AC140912.1	0	0.000709	0	0	0	0
ENST00000561802	ENSG00000261227	AC140912.1	0	0.068057	0	0	0	0
ENST00000570152	ENSG00000261008	LINC01572	0	0.079304	0	0	0	0
ENST00000641127	ENSG00000261404	AC138627.1	0	0.006575	0	0	0	0
ENST00000567317	ENSG00000260737	LINC01227	0	0.036115	0	0	0	0.013128
ENST00000652149	ENSG00000260896	ARLNC1	0	0.004017	0	0	0	0
ENST00000563072	ENSG00000261838	AC092718.6	0.00869	0.06118	0	0	0	0
ENST00000621095	ENSG00000275088	AC026469.1	0	0.00755	0	0	0	0
ENST00000598996	ENSG00000268388	FENDRR	0	0.00197	0	0	0	0
ENST00000594398	ENSG00000268388	FENDRR	0	0.005112	0	0	0	0
ENST00000593604	ENSG00000268388	FENDRR	0	0.011609	0	0	0	0
ENST00000562466	ENSG00000260750	AC092720.1	0	0.037228	0	0	0.008294	0
ENST00000438344	ENSG00000235361	AC016292.1	0	0.021952	0	0	0	0
ENST00000570416	ENSG00000186594	MIR22HG	0.094828	0.696847	0	0	0	0.109954
ENST00000571815	ENSG00000262810	AC090617.4	0	0.021732	0	0	0	0
ENST00000497885	ENSG00000244184	AC091153.3	0.002444	0.090604	0.007353	0.004147	0.001999	0.013854
ENST00000571506	ENSG00000262099	AC004148.1	0	0.020836	0	0	0	0
ENST00000581366	ENSG00000263400	TMEM220-AS1	0	0.017297	0	0	0	0
ENST00000581533	ENSG00000266744	AC005304.3	0	0.018544	0	0	0	0.007695
ENST00000578843	ENSG00000276532	RF00017	0	0.027644	0	0	0	0
ENST00000620534	ENSG00000274747	RN7SL627P	0	0.005034	0	0	0	0
ENST00000582990	ENSG00000264023	AC068418.1	0	0.105379	0.042303	0	0	0
ENST00000577218	ENSG00000264808	AC068025.1	0	0.01976	0	0	0	0
ENST00000586878	ENSG00000266919	AC104984.5	0	0.004467	0	0	0	0
ENST00000579378	ENSG00000263860	AC011840.3	0	0.011861	0	0	0	0
ENST00000578408	ENSG00000265222	AC079336.2	0	0.035903	0	0	0.01132	0
ENST00000605548	ENSG00000270240	AC015849.1	0	0.010626	0	0	0	0
ENST00000621428	ENSG00000277268	LHX1-DT	0	0.007324	0	0	0	0
ENST00000477144	ENSG00000233101	HOXB-AS3	0.002404	0.016537	0	0	0	0
ENST00000580769	ENSG00000264672	SEPT4-AS1	0	0.013937	0	0	0	0.004956
ENST00000580589	ENSG00000264672	SEPT4-AS1	0	0.003676	0	0	0	0
ENST00000472779	ENSG00000239932	RN7SL606P	0.022679	0.079513	0	0	0	0.012191
ENST00000585921	ENSG00000267667	AC005856.1	0	0.001649	0	0	0	0
ENST00000584715	ENSG00000264630	PRKCA-AS1	0	0.001395	0	0	0	0
ENST00000585081	ENSG00000265987	AC011933.4	0	0.003854	0	0	0	0
ENST00000569632	ENSG00000234912	SNHG20	0	0.000425	0	0	0	0
ENST00000648396	ENSG00000267123	SCAT1	0	0.128145	0.019348	0	0	0
ENST00000649791	ENSG00000267123	SCAT1	0.012335	0.120506	0.002144	0.019038	0	0.006581
ENST00000572590	ENSG00000263271	AC110285.4	0	0.018686	0	0	0.005362	0
ENST00000617888	ENSG00000278200	LINC01971	0	0.007939	0	0	0	0
ENST00000584722	ENSG00000265069	AP002409.1	0	0.007251	0	0	0	0
ENST00000583081	ENSG00000266053	NDUFV2-AS1	0	0.015411	0	0	0	0
ENST00000587344	ENSG00000267702	AP005131.6	0	0.000987	0	0	0	0
ENST00000649729	ENSG00000266010	GATA6-AS1	0	0.023227	0	0	0	0.001817
ENST00000578831	ENSG00000265943	AC090912.1	0	0.004748	0	0	0	0
ENST00000579347	ENSG00000264365	AC023983.1	0	0.007337	0	0	0	0
ENST00000589818	ENSG00000267762	AC048380.1	0	0.007201	0	0	0	0
ENST00000590649	ENSG00000267764	AC093567.1	0	0.024985	0	0	0.001516	0
ENST00000587320	ENSG00000267325	LINC01415	0.001935	0.16092	0	0	0	0
ENST00000588925	ENSG00000267787	AC027097.2	0	0.005074	0	0	0	0.001001
ENST00000589242	ENSG00000267000	AC016229.1	0	0.004241	0	0	0	0
ENST00000578039	ENSG00000263594	AC022655.1	0	0.011749	0	0	0	0
ENST00000577806	ENSG00000264247	LINC00909	0	0.037602	0	0	0	0
ENST00000587701	ENSG00000267139	AC005262.2	0.004468	0.024288	0.001363	0.000925	0.000929	0.002736
ENST00000592709	ENSG00000176840	MIR7-3HG	0	0.000268	0	0	0	0
ENST00000601192	ENSG00000269604	AC005523.2	0	0.020996	0	0	0	0
ENST00000588342	ENSG00000267299	AC011444.3	0	0.012801	0	0	0	0
ENST00000593558	ENSG00000268845	AC025278.1	0	0.016156	0	0	0	0
ENST00000613560	ENSG00000278611	ZNF426-DT	0	0.052941	0	0	0	0.016996
ENST00000590065	ENSG00000267212	AC018761.3	0	0.005075	0	0	0	0
ENST00000420038	ENSG00000234848	AC008758.2	0	0.014677	0	0	0	0
ENST00000588095	ENSG00000267610	AC007787.1	0	0.005186	0	0	0	0
ENST00000586483	ENSG00000267598	AC011446.2	0	1.12177	0	0	0	0
ENST00000634813	ENSG00000282851	BISPR	0	0.009935	0	0	0	0
ENST00000598141	ENSG00000269439	AC010618.4	0	0.072037	5.2e-05	0.000282	0	0.025185
ENST00000590607	ENSG00000267498	AC007786.1	0	0.000536	0	0	0	0
ENST00000587859	ENSG00000267498	AC007786.1	0	5.8e-05	0	0	0	0
ENST00000589127	ENSG00000267557	AC008474.1	0	0.022566	0	0	0	0.007625
ENST00000587018	ENSG00000266973	AC092296.1	0	0.021463	0	0	0	0
ENST00000494214	ENSG00000233527	ZNF529-AS1	0	0.060931	0	0	0	0
ENST00000597303	ENSG00000267992	AC010605.1	0	0.001582	0	0	0	0
ENST00000651016	ENSG00000267107	PCAT19	0	0.004046	0	0	0	0
ENST00000652144	ENSG00000267107	PCAT19	0	0.001574	0	0	0	0
ENST00000597702	ENSG00000267107	PCAT19	0	0.000176	0	0	0	0
ENST00000595837	ENSG00000267107	PCAT19	0	0.003549	0	0	0	0
ENST00000596563	ENSG00000269534	AC011466.3	0.001968	0.0092	0.000167	0	0	0.000308
ENST00000599209	ENSG00000268287	AC008687.3	0	0.012847	0	0	0	0
ENST00000600665	ENSG00000268636	AC011495.2	0	0.010036	0	0	0	0
ENST00000600726	ENSG00000267858	MZF1-AS1	0	0.100412	0	0	0	0
ENST00000448106	ENSG00000225619	MYT1L-AS1	0	0.002576	0	0	0	0
ENST00000455965	ENSG00000235092	ID2-AS1	0	2.6e-05	0	0	0	0
ENST00000433592	ENSG00000235092	ID2-AS1	0	0.010762	0	0	0	0
ENST00000430988	ENSG00000224361	AC011239.1	0	0.070335	0	0	0	0
ENST00000423593	ENSG00000237790	LINC01318	0	0.004518	0	0	0	0
ENST00000625324	ENSG00000227028	SLC8A1-AS1	0	0.004826	0	0	0	0.001521
ENST00000600219	ENSG00000240401	AC012358.3	0	0.005164	0	0	0	0
ENST00000647917	ENSG00000228590	AC007381.1	0	0.001608	0	0	0	0
ENST00000449678	ENSG00000225889	AC012368.1	0	0.006494	0	0	0	0
ENST00000453951	ENSG00000230836	LINC01293	0	0.001574	0	0	0	0
ENST00000451622	ENSG00000231172	AC007099.1	0	0.000304	0	0	0	0
ENST00000644125	ENSG00000222041	CYTOR	0.032071	0.171032	0	0.03379	0	0
ENST00000645138	ENSG00000222041	CYTOR	0	0.093279	0	0	0	0
ENST00000436665	ENSG00000175772	LINC01106	0.011688	0.037346	0	0	0	0
ENST00000444301	ENSG00000172965	MIR4435-2HG	0.257397	2.8401	0.290693	0.168221	0.130661	0.168958
ENST00000652488	ENSG00000231943	PGM5P4-AS1	0	0.003171	0	0	0	0
ENST00000451478	ENSG00000226674	TEX41	0	0.064559	0	0.008262	0	0.010955
ENST00000599358	ENSG00000226674	TEX41	0.013331	0.051151	0	0	0	0
ENST00000594837	ENSG00000226674	TEX41	0	0.007034	0	0.000417	0	0
ENST00000628167	ENSG00000226674	TEX41	0	0.087768	0	0	0	0
ENST00000563759	ENSG00000260868	LINC01960	0	0.004416	0	0	0	0
ENST00000456746	ENSG00000213963	AC019080.1	0	0.010697	0	0	0.001184	0
ENST00000582847	ENSG00000237298	TTN-AS1	0	0.003184	0	0	0	0
ENST00000453026	ENSG00000223960	PRKRA-AS1	0	0.00118	0	0	0	0
ENST00000424655	ENSG00000234663	LINC01934	0	0.047009	0	0	0	0
ENST00000626451	ENSG00000226312	CFLAR-AS1	0	0.053078	0	0	0	0
ENST00000438824	ENSG00000225064	LINC01802	0	0.015803	0	0	0	0
ENST00000415479	ENSG00000230838	LINC01614	0	0.01284	0	0	0	0
ENST00000416861	ENSG00000227308	AC009502.1	0	0.004026	0	0	0	0
ENST00000439598	ENSG00000236432	AC097662.1	0	0.000151	0	0	0	0
ENST00000437673	ENSG00000236432	AC097662.1	0	0.06574	0	0.028989	0	0.000333
ENST00000409162	ENSG00000222022	AC112721.1	0	0.291732	0.090842	0.017459	0	0
ENST00000447206	ENSG00000230839	AL121760.1	0	0.084796	0	0.01593	0	0
ENST00000609470	ENSG00000234684	SDCBP2-AS1	0	0.171651	0	0	0.072633	0
ENST00000425746	ENSG00000228604	AL121759.1	0	0.016225	0	0	0	0
ENST00000428254	ENSG00000213742	ZNF337-AS1	0	0.002229	0	0	0	0
ENST00000437730	ENSG00000223891	OSER1-DT	0.002252	0.016269	0	0	0	0
ENST00000255183	ENSG00000283440	LINC01260	0	0.004447	0	0	0	0
ENST00000437920	ENSG00000224565	LINC01754	0.004684	0.03692	0.008284	0	0	0
ENST00000451960	ENSG00000234698	AL161937.1	0	0.048211	0	0	0	0
ENST00000424434	ENSG00000225806	AL121917.1	0	0.000206	0	0	0	0
ENST00000625153	ENSG00000278932	CR381653.1	0	0.008961	0	0	0	0
ENST00000431661	ENSG00000215533	LINC00189	0	0.006391	0	0	0	0
ENST00000453716	ENSG00000232539	LINC00945	0	0.0051	0	0	0	0
ENST00000382378	ENSG00000205930	C21orf62-AS1	0	0.015298	0	0	0	0
ENST00000467060	ENSG00000244294	RN7SL740P	0	0.008707	0	0	0	0
ENST00000652751	ENSG00000234380	LINC01426	0.003094	0.0098	0	0	0	0
ENST00000422473	ENSG00000233393	AP000688.2	0	0.007124	0	0	0	0
ENST00000457669	ENSG00000231324	AP000696.1	0	0.003011	0	0	0	0
ENST00000329743	ENSG00000185837	HDHD5-AS1	0	0.000325	0	0	0	0
ENST00000417083	ENSG00000244625	MIATNB	0.026929	0.101203	0	0	0	0
ENST00000641466	ENSG00000284633	AL031590.1	0	0.00479	0	0	0	0
ENST00000607915	ENSG00000229999	AL022238.2	0	0.003035	0	0	0	0
ENST00000420537	ENSG00000231993	EP300-AS1	0	0.117087	0	0.011415	0	0.024523
ENST00000651948	ENSG00000224271	AL117329.1	0	0.013013	0	0	0	0
ENST00000623740	ENSG00000280395	AL034546.1	0	0.006759	0	0	0	0
ENST00000489771	ENSG00000235978	AC018816.1	0	0.007791	0	0	0	0
ENST00000414603	ENSG00000189229	AC069277.1	0	0.025529	0	0	0	0
ENST00000521708	ENSG00000206573	THUMPD3-AS1	0	0.001891	0	0.000179	0	0.000115
ENST00000519043	ENSG00000206573	THUMPD3-AS1	0	0.9366	0	0.000266	0	0
ENST00000608068	ENSG00000272554	AC012087.2	0	0.010285	0	0	0	0
ENST00000418161	ENSG00000173811	CCDC13-AS1	0	0.004074	0	0	0	0
ENST00000496499	ENSG00000241461	RN7SL182P	0	0.012573	0	0	0	0
ENST00000425674	ENSG00000235016	SEMA3F-AS1	0	0.013917	0	0	0	0
ENST00000478366	ENSG00000239799	ITIH4-AS1	0	0.026409	0	0	0	0.010995
ENST00000468646	ENSG00000241163	LINC00877	0	0.006178	0	0	0.00261	0
ENST00000606742	ENSG00000242759	LINC00882	0	0.007056	0	0	0	0
ENST00000651804	ENSG00000243701	DUBR	0	0.095982	0	0	0	0
ENST00000605698	ENSG00000271270	TMCC1-AS1	0	0.029284	0	0	0	0.00936
ENST00000462176	ENSG00000249407	IL20RB-AS1	0	0.0052	0	0	0	0
ENST00000462931	ENSG00000243885	AC108751.4	0.002611	0.015	0	0	0	0
ENST00000469196	ENSG00000241544	LINC02029	0.005393	0.083242	0.025478	0	0	0
ENST00000468232	ENSG00000242578	AC073288.2	0	0.015747	0	0	0	0
ENST00000411727	ENSG00000223930	AC117453.1	0	0.003975	0	0	0	0
ENST00000435560	ENSG00000229102	AC076966.1	0	0.016218	0	0	0	0
ENST00000423318	ENSG00000237222	LINC01968	0	0.002281	0	0	0	0
ENST00000447975	ENSG00000230266	XXYLT1-AS2	0	0.010613	0	0	0	0
ENST00000627555	ENSG00000242086	MUC20-OT1	0	0.009193	0	0	0	0
ENST00000627016	ENSG00000242086	MUC20-OT1	0	0.016494	0	0	0	0
ENST00000626870	ENSG00000242086	MUC20-OT1	0.001068	0.006649	0	1e-06	0	0
ENST00000510640	ENSG00000251460	AC097381.2	0	0.046559	0	0	0.004153	0.001373
ENST00000514452	ENSG00000249631	AC005699.1	0	0.03805	0	0	0	0
ENST00000508202	ENSG00000250497	AC007126.1	0	0.001717	0	0	0	0
ENST00000507117	ENSG00000250846	EPHA5-AS1	0	0.018531	0	0	0	0
ENST00000651773	ENSG00000180769	WDFY3-AS2	0	0.053163	0	0	0	0
ENST00000506972	ENSG00000248161	AC098487.1	0	0.041559	0	0	0	0
ENST00000507494	ENSG00000245322	AC097460.1	0	0.032596	0	0	0	0
ENST00000515414	ENSG00000251586	TET2-AS1	0	0.030834	0	0	0	0
ENST00000499098	ENSG00000245293	AC096564.1	0	0.000938	0	0	0	0
ENST00000629462	ENSG00000281731	METTL14-DT	0	0.001458	0	0	0	0
ENST00000628457	ENSG00000281731	METTL14-DT	0	0.017605	0	0	0	0
ENST00000608178	ENSG00000196951	SCOC-AS1	0.041741	2.53618	0.001455	0.026926	0.075538	0.01564
ENST00000509161	ENSG00000248810	LINC02432	0	0.005349	0	0	0	0
ENST00000608088	ENSG00000272632	AC097504.2	0	0.005193	0	0	0	0
ENST00000317596	ENSG00000180712	LINC02363	0	1.3e-05	0	0	0	0
ENST00000514788	ENSG00000248677	LINC02102	0	0.039018	0	0	0	0
ENST00000637153	ENSG00000251423	AC016576.1	0	0.002329	0	0	0	0
ENST00000511596	ENSG00000249937	LINC02223	0	0.004367	0	0	0	0
ENST00000641970	ENSG00000251273	LINC02228	0	0.001576	0	0	0	0
ENST00000508745	ENSG00000250155	AC008957.1	0	0.014127	0	0	0	0
ENST00000514586	ENSG00000250629	AC091435.2	0.013946	0.041823	0	0	0	0
ENST00000508123	ENSG00000251141	MRPS30-DT	0	0.027623	0	0	0	0
ENST00000505401	ENSG00000251141	MRPS30-DT	0	0.008666	0	0	0	0
ENST00000503559	ENSG00000249899	AC025180.1	0	0.033575	0	0	0	0
ENST00000504876	ENSG00000152931	PART1	0	0.002919	0	0	0	0
ENST00000504280	ENSG00000249352	LINC02198	0	0.02876	0	0	0	0
ENST00000643269	ENSG00000250802	ZBED3-AS1	0	9.2e-05	0	0	0	0
ENST00000516142	ENSG00000251951	RN7SKP34	0.002583	0.020006	0	0	0	0
ENST00000512585	ENSG00000248309	MEF2C-AS1	0	0.001909	0	0	0	0
ENST00000514092	ENSG00000248309	MEF2C-AS1	0	0.00566	0	0	0	0
ENST00000514571	ENSG00000248309	MEF2C-AS1	0	0.004159	0	0	0	0
ENST00000506041	ENSG00000250156	LINC02060	0	0.001399	0	0	0	0
ENST00000647761	ENSG00000248323	LUCAT1	0	0.002865	0	0	0	0
ENST00000650067	ENSG00000248323	LUCAT1	0	0.008948	0	0	0	0
ENST00000648751	ENSG00000248323	LUCAT1	0	0.016106	0	0	0	0
ENST00000650529	ENSG00000248323	LUCAT1	0	0.02703	0	0.000185	0	0.003643
ENST00000649654	ENSG00000248323	LUCAT1	0	0.014528	0	0	0	0
ENST00000648773	ENSG00000248323	LUCAT1	0	0.138543	0.062746	0	0	0
ENST00000510254	ENSG00000237187	NR2F1-AS1	0	0.030084	0	0	0	0
ENST00000502324	ENSG00000248202	LINC02234	0	0.040027	0	0	0	0
ENST00000510972	ENSG00000250328	AC022101.1	0	0.001227	0	0.000122	0	0
ENST00000640718	ENSG00000283897	AC011416.3	0	0.023056	0	0	0	0
ENST00000501173	ENSG00000245937	LINC01184	0	0.00367	0	0	0	0
ENST00000431165	ENSG00000230612	AC004039.1	0	0.012404	0	0	0	0
ENST00000458509	ENSG00000223442	TH2LCRR	0	6.4e-05	0	0	0	0
ENST00000435042	ENSG00000223442	TH2LCRR	0	0.001104	0	0	0	0
ENST00000523452	ENSG00000245146	MALINC1	0	0.000522	0	0	0	0
ENST00000509568	ENSG00000251183	LINC01861	0	0.034498	0	0	0	0.00299
ENST00000636261	ENSG00000249738	AC008691.1	0	0.009826	0	0	0	0
ENST00000647982	ENSG00000285549	AC091973.1	0.00169	0.008958	0	0	0	0
ENST00000522956	ENSG00000254187	AC008708.2	0	0.007403	0	0	0	0
ENST00000518818	ENSG00000204758	AC008429.1	0	0.052099	0	0	0	0
ENST00000518894	ENSG00000204758	AC008429.1	0	2.7e-05	0	0	0	0
ENST00000523205	ENSG00000253968	AC016573.1	0	0.017436	0	0	0	0
ENST00000520300	ENSG00000254164	AC008663.3	0	0.016793	0	0	0	0
ENST00000503317	ENSG00000249722	AC025752.1	0	0.014911	0	0	0	0
ENST00000507361	ENSG00000249306	LINC01411	0	0.05436	0	0	0	0
ENST00000530346	ENSG00000250903	GMDS-DT	0	0.019424	0	0	0	0
ENST00000606884	ENSG00000250903	GMDS-DT	0	0.004112	0	0	0	0
ENST00000427049	ENSG00000234817	AL136309.2	0.018361	0.152558	0	0	0	0
ENST00000423260	ENSG00000229931	AL137003.1	0	0.100136	0	0	0	0
ENST00000637901	ENSG00000283480	AL512380.2	0	0.008168	0	0	0	0
ENST00000427196	ENSG00000232940	HCG25	0	0.003581	0	0	0	0
ENST00000652370	ENSG00000233237	LINC00472	0.002648	0.020067	0.001662	0	0	0.001619
ENST00000433637	ENSG00000271860	AL589740.1	0	0.003713	0	0	0	2.5e-05
ENST00000452363	ENSG00000231628	AL133406.2	0	0.000324	0	0	0	0
ENST00000525151	ENSG00000231889	TRAF3IP2-AS1	0	0.128435	0	0	0	0
ENST00000519629	ENSG00000228624	HDAC2-AS2	0	0.001639	0	0	0	0
ENST00000607573	ENSG00000227954	TARID	0	0.001444	0	0	0	0
ENST00000606327	ENSG00000237499	AL357060.1	0	0.01249	0	0	0	0
ENST00000452617	ENSG00000235652	AL356599.1	0	0.055583	0	0	0	0.011945
ENST00000472053	ENSG00000273132	AL355312.4	0	0.049718	0	0.010682	0	0.000105
ENST00000421161	ENSG00000224478	AL356417.1	0	0.009847	0	0	0	0
ENST00000437964	ENSG00000230487	PSMG3-AS1	0	0.000704	0	0	0.000155	0
ENST00000437621	ENSG00000230487	PSMG3-AS1	0	0.001216	0	0	0.000108	0
ENST00000480694	ENSG00000176349	AC104129.1	0	0.003708	0	0	0	0
ENST00000608807	ENSG00000272894	AC004982.2	0	0.007175	0	0	0	0
ENST00000424101	ENSG00000237773	AC073332.1	0.000859	0.004308	0	0	0	0
ENST00000419463	ENSG00000236318	AC019117.2	0	0.002883	0	0	0	0
ENST00000419944	ENSG00000232821	AC003986.2	0	0.00436	0	0	4.1e-05	0
ENST00000517550	ENSG00000253552	HOXA-AS2	0	0.029434	0.01293	0	0	0
ENST00000517635	ENSG00000253552	HOXA-AS2	0	0.090182	0	0	0	0.029955
ENST00000419103	ENSG00000227014	AC007285.1	0	0.060033	0	0.020596	0	0
ENST00000381493	ENSG00000205745	AC083864.1	0	0.005558	0	0	0	0
ENST00000433519	ENSG00000224122	POU6F2-AS1	0	0.010919	0	0	0	0
ENST00000439751	ENSG00000227172	AC011290.1	0	0.004288	0	0	0	0
ENST00000631088	ENSG00000232006	AC005537.1	0	0.017009	0	0	0	0
ENST00000605580	ENSG00000232667	AC004862.1	0	0.005143	0	0	0	0
ENST00000415965	ENSG00000223969	AC002456.1	0	0.195644	0.016784	0	0.011351	0.031535
ENST00000492523	ENSG00000241357	AC092849.2	0.148617	1.49197	0.073224	0.051579	0.052199	0.131346
ENST00000475791	ENSG00000243797	AC004917.1	0	0.007252	0	0	0	0
ENST00000602761	ENSG00000228742	LINC02577	0	0.017939	0	0	0	0
ENST00000434993	ENSG00000226367	ST7-AS2	0	0.005359	0	0	0	0.001678
ENST00000587038	ENSG00000244036	AC073320.1	0	0.005507	0	0	0	0
ENST00000447430	ENSG00000233559	LINC00513	0	0.003304	0	0	0	0
ENST00000487102	ENSG00000284644	AC074386.1	0	0.002843	0	0	0	0
ENST00000466775	ENSG00000243018	AC005486.1	0	0.031298	0	0.011619	0	0
ENST00000377722	ENSG00000204876	AC021218.1	0.006628	0.042394	0	0	0	0.005531
ENST00000435354	ENSG00000182648	LINC01006	0	0.015661	0	0	0	0
ENST00000333319	ENSG00000182648	LINC01006	0	0.375274	0	0	0	0
ENST00000631653	ENSG00000282375	AC100797.5	0	0.004554	0	0	0	0
ENST00000567210	ENSG00000260721	AF067845.1	0	0.00698	0	0	0	0
ENST00000518539	ENSG00000253696	KBTBD11-OT1	0	0.040837	0	0	0	0
ENST00000605539	ENSG00000270988	AC019257.2	0	0.048439	0	0	0	0
ENST00000529252	ENSG00000225725	FAM66E	0	0.004713	0	0	0	0
ENST00000524338	ENSG00000246430	LINC00968	0	0.040107	0	0	0	0
ENST00000522281	ENSG00000253376	AC012103.1	0	0.010383	0	0	0	0
ENST00000623646	ENSG00000274956	NKAIN3-IT1	0	0.001182	0	0	0	0
ENST00000520799	ENSG00000254377	MIR124-2HG	0	0.008321	0	0	0	0
ENST00000521147	ENSG00000249395	CASC9	0	0.030915	0	0	0	0
ENST00000502766	ENSG00000249328	AC036214.1	0	0.003155	0	0	0	0
ENST00000522776	ENSG00000253503	AC060765.1	0	0.003399	0	0	0	0
ENST00000650562	ENSG00000285768	AC232323.2	0.009487	0.045084	0	0	0	0
ENST00000521433	ENSG00000253553	AC090578.1	0	0.048279	0	0	0	0
ENST00000501194	ENSG00000246792	AC106038.1	0	0.000232	0	0	0	0
ENST00000518090	ENSG00000253737	AP003469.3	0	0.055401	0	0	0	0
ENST00000524369	ENSG00000253395	AP003469.2	0	0.032112	0	0.006759	0	0
ENST00000517389	ENSG00000253320	AZIN1-AS1	0	0.051908	0	0	0	0
ENST00000521383	ENSG00000247081	BAALC-AS1	0.056466	0.19376	0.028466	0	0	0
ENST00000519861	ENSG00000245149	RNF139-AS1	0.000494	0.042519	0	0.000233	0.000234	0
ENST00000517915	ENSG00000253438	PCAT1	0	0.010725	0	0	0	0
ENST00000521600	ENSG00000249859	PVT1	0	0.038127	0	0	0	0
ENST00000504719	ENSG00000249859	PVT1	0.00043	0.188929	2e-06	9.3e-05	0.000102	9.5e-05
ENST00000518973	ENSG00000253288	AC046195.1	0	0.06853	0	0.003619	0.007539	0
ENST00000518520	ENSG00000254019	AC011676.2	0	0.005191	0	0	0	0
ENST00000599229	ENSG00000236404	VLDLR-AS1	0.011079	0.129932	0.025776	0	0	0
ENST00000457383	ENSG00000230001	AL359095.1	0	0.031857	0	0	0	0
ENST00000445604	ENSG00000234665	AL512625.3	0	0.453151	0	0	0	0
ENST00000629181	ENSG00000233178	AL161457.2	0	0.013377	0	0	0	0
ENST00000414768	ENSG00000229694	AL158071.1	0	0.002027	0	0	0	0
ENST00000603533	ENSG00000271384	AL161729.3	0	0.024727	0	0	0	0.000633
ENST00000444936	ENSG00000223795	AL669970.1	0	0.037032	0	0	0	0
ENST00000429224	ENSG00000237886	NALT1	0	0.001703	0	0	0	0
ENST00000445785	ENSG00000230542	LINC00102	0	0.006209	0	0	0	0
ENST00000452900	ENSG00000237836	PHKA2-AS1	0	0.015985	0	0	0	0
ENST00000637785	ENSG00000283546	BX088723.1	0	0.033021	0	0	0	0
ENST00000432359	ENSG00000235806	AF241728.1	0	0.018132	0	0	0	0
ENST00000440955	ENSG00000224294	PINCR	0	0.015295	0	0	0.005736	0
ENST00000620748	ENSG00000277605	RF00017	0	0.002765	0	0.000948	0	0
ENST00000451979	ENSG00000233661	SPIN4-AS1	0	0.043344	0.008342	0	0	0
ENST00000602441	ENSG00000270050	AL035427.1	0	0.003583	0	0	0	0
ENST00000607680	ENSG00000271826	PLS3-AS1	0	0.001196	0	0	0	0
ENST00000608079	ENSG00000228372	SMIM10L2B-AS1	0	0.005943	0	0	0	0
ENST00000441841	ENSG00000236091	LINC02243	0	0.013453	0	0	0	0
ENST00000430173	ENSG00000241769	LINC00893	0	0.041825	0	0	0	0
ENST00000432696	ENSG00000235703	LINC00894	0	0.0157	0	0	0	0
ENST00000651143	ENSG00000286009	AC244213.1	0	0.001124	0	0	0	0
ENST00000641212	ENSG00000284623	AL139158.3	0	0.005327	0	0	0	0
ENST00000635048	ENSG00000226476	LINC01748	0	0.001465	0	0	0	0
ENST00000426794	ENSG00000230285	AC092807.1	0	0.037117	0	0	0	0
ENST00000429469	ENSG00000223881	AL157402.1	0	0.02911	0	0	0	0
ENST00000467120	ENSG00000244066	RN7SL148P	0	0.010637	0	0	0	0
ENST00000448272	ENSG00000233256	AL355870.1	0	0.018327	0	0	0	0
ENST00000444900	ENSG00000235931	LINC01553	0	0.004554	0	0	0	0
ENST00000608672	ENSG00000272592	AL451049.1	0	0.008259	0	0	0	0
ENST00000532242	ENSG00000254695	AC087379.2	0	0.016222	0	0	0	0
ENST00000648434	ENSG00000285705	AC090692.2	0	0.008833	0	0	0	0
ENST00000637808	ENSG00000273409	AP003481.1	0	0.023617	0	0	0	0
ENST00000618127	ENSG00000225342	AC079630.1	0	0.004522	0	0.00108	0	0
ENST00000548705	ENSG00000257741	LINC01490	0	0.007093	0	0	0	0
ENST00000538405	ENSG00000256884	AC084880.4	0	0.014372	0	0	0	0
ENST00000541797	ENSG00000256922	AC087894.2	0	0.023233	0	0	0	0
ENST00000646895	ENSG00000285448	AL136961.1	0	0.004689	0	0	0	0
ENST00000448407	ENSG00000232307	DAOA-AS1	0	0.002267	0	0	0	0
ENST00000553534	ENSG00000258918	AL355922.4	0	0.004267	0	0	0	0
ENST00000548170	ENSG00000257612	MIR4307HG	0	0.020177	0	0	0	0
ENST00000555024	ENSG00000258860	AL133163.2	0	0.011556	0	0	0	0
ENST00000554319	ENSG00000258845	AL139354.1	0	0.005504	0	0	0	0
ENST00000554046	ENSG00000258753	AL359792.1	0	0.013525	0	0	0	0
ENST00000554205	ENSG00000259028	AL135746.1	0	0.01516	0	0	0	0
ENST00000556586	ENSG00000258735	LINC00637	0	0.004047	0	0	0	0
ENST00000553416	ENSG00000258710	LINC01193	0	0.003262	0	0	0	0
ENST00000565706	ENSG00000261304	LINC02252	0	0.019072	0	0	0	0
ENST00000647643	ENSG00000285934	AC091074.1	0	0.008645	0	0	0	0
ENST00000611178	ENSG00000274937	AC090826.2	0	0.011174	0	0	0	0
ENST00000634367	ENSG00000283003	AC007221.2	0	0.005266	0	0	0	0
ENST00000431343	ENSG00000230971	AC005703.1	0	0.006719	0	0	0	0
ENST00000604907	ENSG00000270977	AC015849.5	0	0.00152	0	0	0	0
ENST00000580125	ENSG00000264735	AC145207.7	0	0.008685	0	0	0	0
ENST00000580622	ENSG00000264634	AC100844.1	0	0.008328	0	0	0	0
ENST00000599641	ENSG00000268654	MIMT1	0	0.005816	0	0	0	0
ENST00000597105	ENSG00000268654	MIMT1	0	0.000779	0	0	0	0
ENST00000492300	ENSG00000244310	AC093904.3	0.005353	0.063233	0.02242	0	0	0
ENST00000426527	ENSG00000223634	AC012506.2	0	0.00817	0	0	0	0
ENST00000578326	ENSG00000264352	RN7SL602P	0	0.002675	0	0	0	0
ENST00000425887	ENSG00000235584	AC008268.1	0	0.022208	0	0	0	0
ENST00000568958	ENSG00000261829	AC009407.1	0	0.005334	0	0	0	0
ENST00000613502	ENSG00000230387	AL118508.1	0	0.003548	0	0	0	0
ENST00000362813	ENSG00000199683	RN7SKP185	0	0.025268	0	0	0	0.00764
ENST00000652193	ENSG00000286052	AL109955.2	0	0.010304	0	0	0	0
ENST00000454128	ENSG00000232884	AF127936.2	0	0.006265	0	0	0	0
ENST00000615324	ENSG00000205622	AP001043.1	0	0.044279	0	0	0	0
ENST00000624224	ENSG00000280418	AC007326.2	0	0.002192	0	0	0	0
ENST00000608615	ENSG00000272733	AP000345.2	0	0.005958	0	0	0	0
ENST00000433970	ENSG00000229971	AL022313.3	0	0.019928	0	0	0	0
ENST00000428838	ENSG00000225867	AL022315.1	0	0.004623	0	0	0	0
ENST00000453828	ENSG00000233096	AC099541.1	0	0.012419	0	0	0	0
ENST00000647973	ENSG00000285631	AC097105.1	0	0.015447	0	0	0	0
ENST00000473299	ENSG00000243620	AC092957.1	0	0.01053	0	0	0	0
ENST00000488262	ENSG00000241696	LINC02053	0	0.017703	0	0	0	0
ENST00000631282	ENSG00000242512	LINC01206	0	0.006314	0	0	0	0
ENST00000609211	ENSG00000273403	AC107294.3	0	0.015818	0	0	0	0
ENST00000509360	ENSG00000248802	AC078850.2	0	0.016502	0	0	0.001206	0
ENST00000649025	ENSG00000285563	AC106872.12	0	0.006746	0	0	0	0
ENST00000652035	ENSG00000286039	AC093849.2	0	0.010112	0	0	0	0
ENST00000508790	ENSG00000250263	LINC02509	0	0.021112	0	0	0	0
ENST00000651306	ENSG00000286271	AC008945.2	0	0.003114	0	0	0	0
ENST00000515556	ENSG00000249743	AC116345.1	0	0.00646	0	0	0	0
ENST00000627179	ENSG00000281327	LINC01338	0	0.013165	0	0	0	0
ENST00000507387	ENSG00000250874	AC010595.1	0	0.005726	0	0	0	0
ENST00000526556	ENSG00000233183	AL138889.1	0	0.018268	0	0	0	0
ENST00000373170	ENSG00000204091	TDRG1	0	0.021426	0	0	0	0.008439
ENST00000447557	ENSG00000236389	AL121970.1	0	0.007547	0	0	0	0
ENST00000607091	ENSG00000272128	AP006545.2	0	0.004873	0	0	0	0
ENST00000517380	ENSG00000253165	AC090821.1	0	0.002017	0	0	0	0
ENST00000510610	ENSG00000253715	AC083841.2	0	0.010408	0	0	0	0
ENST00000608422	ENSG00000272866	AL135786.2	0	0.040588	0	0	0	0
ENST00000460537	ENSG00000244230	RN7SL151P	0	0.014701	0	0	0	0
ENST00000612217	ENSG00000276759	AL353753.1	0	0.008593	0.003505	0	0	0
ENST00000566293	ENSG00000260412	AL353746.1	0	0.001814	0	0	0	0
ENST00000622281	ENSG00000275676	BX005040.1	0	0.007389	0	0	0	0
ENST00000621296	ENSG00000277350	AL353770.4	0	0.00734	0	0	0	0
ENST00000616253	ENSG00000276348	AL353770.3	0	0.001909	0	0	0	0
ENST00000423380	ENSG00000230537	AL158071.3	0	0.002552	0	0	0	0
ENST00000442072	ENSG00000233081	AL353764.1	0	0.048917	0	0	0	0.014603
ENST00000447651	ENSG00000223486	AC092198.1	0	0.003092	0	0	0	0
ENST00000418369	ENSG00000206062	AL121823.1	0	0.005614	0	0	0	0
ENST00000614439	ENSG00000275070	RF00017	0.000627	0.019973	0	0	0	0
TCONS_00001618	ENSG00000142609	CFAP74	0	0.006803	0	0	0	0
TCONS_00022855	ENSG00000142623	PADI1	0	0.030753	0	0	0	0
TCONS_00023100	ENSG00000158825	CDA	0.039189	0.126262	0.007895	0	0	0
TCONS_00023396	ENSG00000227868	TEX46	0	0.025149	0	0	0	0.009925
TCONS_00023625	ENSG00000001460	STPG1	0	0.011477	0	0	0.002685	0
TCONS_00005068	ENSG00000162526	TSSK3	0.011635	0.200523	0	0	0.007944	0
TCONS_00008453	ENSG00000033122	LRRC7	0.033217	0.120219	0.000275	0	0	0.012175
TCONS_00027729	ENSG00000033122	LRRC7	0.008654	0.193906	0.003144	0	0	0
TCONS_00028194	ENSG00000142875	PRKACB	0	0.019395	0	0	0	0
TCONS_00010030	XLOC_004119	XLOC_004119	0	0.233542	0	0	0	0
TCONS_00029500	XLOC_011928	XLOC_011928	0	0.011873	0	0	0	0
TCONS_00011359	ENSG00000134198	TSPAN2	0	0.051059	0.004033	0.014882	0	0
TCONS_00011375	XLOC_004676	XLOC_004676	0	0.187068	0	0.002289	0	0
TCONS_00030674	XLOC_012452	XLOC_012452	0	0.021368	0	0	0	0
TCONS_00011883	XLOC_004887	XLOC_004887	0.02853	0.081453	0	0.005893	0	0
TCONS_00031817	XLOC_012854	XLOC_012854	0	0.072283	0	0	0	0
TCONS_00013726	ENSG00000116539	ASH1L	0	0.12181	0	0	0	0
TCONS_00013773	ENSG00000132676	DAP3	0	0.069479	0	0	0	0
TCONS_00013770	ENSG00000132676	DAP3	0	0.185772	0.045023	0	0	0
TCONS_00014692	ENSG00000198929	NOS1AP	0	0.005715	0	0	0	0.00197
TCONS_00014693	ENSG00000198929	NOS1AP	0.003525	0.140822	0	0	0	0
TCONS_00014784	XLOC_005841	XLOC_005841	0	0.060943	0	0.020674	0	0
TCONS_00015227	XLOC_006067	XLOC_006067	0	0.096831	0	0	0	0.009399
TCONS_00035026	XLOC_013995	XLOC_013995	0	0.069693	0	0	0	0
TCONS_00016139	XLOC_006445	XLOC_006445	0	0.082721	0	0	0	0.004821
TCONS_00035479	ENSG00000162687	KCNT2	0	0.066196	0.004408	0	0	0.001456
TCONS_00017090	XLOC_006923	XLOC_006923	0	0.023957	0	0	0	0
TCONS_00018300	XLOC_007427	XLOC_007427	0	0.076031	0	0	0	0
TCONS_00018359	XLOC_007460	XLOC_007460	0	0.030937	0	0	0	0
TCONS_00037036	ENSG00000092969	TGFB2	0	0.000721	0	0	0	0
TCONS_00018793	ENSG00000162923	WDR26	0.000264	0.058607	0	0	0	0.000509
TCONS_00019655	ENSG00000135749	PCNX2	0	0.227836	0	0	0	0
TCONS_00038565	XLOC_015775	XLOC_015775	0.003839	0.025023	0	0	0	0
TCONS_00038601	ENSG00000182901	RGS7	0.000232	0.362615	0.002785	0	0.062582	0.01455
TCONS_00047347	XLOC_019784	XLOC_019784	0	0.049523	0	0	0	0
TCONS_00047406	XLOC_019825	XLOC_019825	0	0.052337	0.006335	0	0	0.008934
TCONS_00047853	ENSG00000181192	DHTKD1	0	0.083205	0	0	0	0
TCONS_00048158	ENSG00000107611	CUBN	0	0.29093	0.033766	0	0	0
TCONS_00048827	XLOC_020499	XLOC_020499	0	0.162462	0	0	0	0
TCONS_00041582	XLOC_017208	XLOC_017208	0	0.035424	0	0	0	0
TCONS_00041837	XLOC_017308	XLOC_017308	0	0.023862	0	0	0	0
TCONS_00041800	XLOC_017288	XLOC_017288	0	0.021451	0	0	0	0
TCONS_00041721	XLOC_017268	XLOC_017268	0	0.024037	0	0	0	0
TCONS_00041730	ENSG00000204176	SYT15	0	0.038328	0	0	0.001134	0
TCONS_00050096	XLOC_021075	XLOC_021075	0	0.033512	0	0	0	0
TCONS_00050102	XLOC_021075	XLOC_021075	0	0.082453	0	0	0	0
TCONS_00042395	ENSG00000182010	RTKN2	0	0.006665	0	0	0	0
TCONS_00050854	XLOC_021489	XLOC_021489	0	0.075299	0	0	0	0
TCONS_00051000	ENSG00000138286	FAM149B1	0.003942	0.100651	0.003945	0	0	0.006835
TCONS_00043425	ENSG00000148655	LRMDA	0	0.105068	0.04066	0	0	0
TCONS_00043432	ENSG00000148655	LRMDA	0	0.024306	0	0	0	0
TCONS_00043917	XLOC_018276	XLOC_018276	0	0.041891	0	0	0	0
TCONS_00046718	XLOC_019516	XLOC_019516	0.022569	0.118459	0.000322	0	0	0
TCONS_00046900	ENSG00000132334	PTPRE	0	0.26284	0	0	0	0
TCONS_00054960	ENSG00000142089	IFITM3	0	0.003496	0	0	0	0
TCONS_00067489	ENSG00000166368	OR2D2	0	0.073064	0	0.005491	0	0
TCONS_00067578	ENSG00000279000	OR10A6	0	0.092142	0	0	0.006218	0.002549
TCONS_00056389	ENSG00000133805	AMPD3	0	0.058625	0	0	0	0
TCONS_00057210	XLOC_024126	XLOC_024126	0	0.037145	0	0	0	0
TCONS_00057383	ENSG00000169519	METTL15	0	0.170661	0	0	0	0
TCONS_00057694	ENSG00000110427	KIAA1549L	0	0.093469	0	0	0	0
TCONS_00057807	XLOC_024324	XLOC_024324	0	0.004668	0	0	0	0
TCONS_00069476	XLOC_028526	XLOC_028526	0	0.059711	0.002569	0	0	0
TCONS_00069474	XLOC_028526	XLOC_028526	0	0.146259	0.046751	0.018608	0	0
TCONS_00069540	ENSG00000110436	SLC1A2	0	0.047619	0.013599	0	0	0
TCONS_00069830	ENSG00000187479	C11orf96	0	0.023773	0	0	0	0
TCONS_00059236	XLOC_024932	XLOC_024932	0	0.012762	0	0	0	0
TCONS_00073056	XLOC_029715	XLOC_029715	0	0.032563	0	0	0	0
TCONS_00073080	ENSG00000172927	MYEOV	0	0.193653	0.087683	0	0	0
TCONS_00061609	ENSG00000172927	MYEOV	0	0.046495	0	0.020218	0	0
TCONS_00061653	XLOC_025607	XLOC_025607	0	0.027305	0.006596	0	0	0
TCONS_00073655	ENSG00000054965	FAM168A	0	0.024838	0	0	0	0
TCONS_00074340	XLOC_030166	XLOC_030166	0	0.123416	0	0	0	0
TCONS_00074280	ENSG00000149256	TENM4	0	0.104597	0.000729	0.011653	0.004431	0.003842
TCONS_00074568	XLOC_030382	XLOC_030382	0	0.019633	0	0	0	0
TCONS_00063210	XLOC_026166	XLOC_026166	0	0.055206	0	0	0	0
TCONS_00063192	XLOC_026166	XLOC_026166	0	0.072878	0	0	0	0
TCONS_00075053	XLOC_030607	XLOC_030607	0	0.009033	0	0	0	0
TCONS_00075778	XLOC_031024	XLOC_031024	0.016608	0.160156	0	0	0	0.042986
TCONS_00077022	XLOC_031450	XLOC_031450	0	0.001407	0	0	0	0
TCONS_00065320	ENSG00000149403	GRIK4	0	0.0039	0	0	0	0
TCONS_00065321	ENSG00000149403	GRIK4	0.000403	0.103199	0	0.005212	0	0
TCONS_00066006	ENSG00000134909	ARHGAP32	0	0.072522	0.000817	0	0	0
TCONS_00077718	XLOC_031703	XLOC_031703	0	0.041116	0	0	0	0
TCONS_00077713	ENSG00000170325	PRDM10	0.000275	0.044348	0.001316	0.002271	0.0052	0.000428
TCONS_00066106	XLOC_027268	XLOC_027268	0	0.075153	0	0	0	0.017545
TCONS_00089284	XLOC_035949	XLOC_035949	0	0.026018	3.1e-05	0	0	0.006399
TCONS_00080461	XLOC_032718	XLOC_032718	0	0.158172	0	0	0	0
TCONS_00082567	ENSG00000012822	CALCOCO1	0	0.02204	0	0	0	0
TCONS_00094586	XLOC_037805	XLOC_037805	0	0.147341	0.007828	0	0	0
TCONS_00095527	XLOC_038265	XLOC_038265	0	0.129119	0	0	0	0
TCONS_00086399	ENSG00000084112	SSH1	0	0.135482	0	0	0	0
TCONS_00097457	ENSG00000122970	IFT81	0	0.036898	0	0	0	0
TCONS_00097534	ENSG00000122986	HVCN1	0.02262	0.179451	0.010997	0.02035	0.026515	0
TCONS_00087236	ENSG00000135116	HRK	0.023826	0.138702	0	0.00448	0.014761	0.012552
TCONS_00087272	ENSG00000111445	RFC5	0	1.70675	0	0	0	0
TCONS_00099983	ENSG00000102678	FGF9	0	0.099461	0	0	0	0.004382
TCONS_00100440	XLOC_040273	XLOC_040273	0	0.080005	0	0	0	0
TCONS_00100751	XLOC_040428	XLOC_040428	0	0.01849	0	0	0	0
TCONS_00105534	ENSG00000139656	SMIM2	0	0.043545	0	0	0	0
TCONS_00101506	XLOC_040784	XLOC_040784	0	0.035345	8e-05	0	0	0
TCONS_00106834	XLOC_043475	XLOC_043475	0	0.02809	0	0	0	0.00233
TCONS_00102888	ENSG00000125257	ABCC4	0	0.013725	0	0	0	0
TCONS_00107358	XLOC_043811	XLOC_043811	0	0.024616	0.010176	0	0	0
TCONS_00115925	XLOC_047127	XLOC_047127	0	0.006764	0.001408	0	0	0
TCONS_00110130	XLOC_045038	XLOC_045038	0	0.026434	0	0	0	0
TCONS_00117695	ENSG00000020577	SAMD4A	0.118791	0.354236	0	0	0.0073	0
TCONS_00119414	XLOC_048579	XLOC_048579	0	0.245488	0.023502	0	0	0
TCONS_00112943	ENSG00000185070	FLRT2	0.001684	0.065345	0.002256	0.002222	0.013436	0.008494
TCONS_00112939	ENSG00000185070	FLRT2	0	0.064245	0	0	0	0
TCONS_00112948	ENSG00000185070	FLRT2	0	0.031568	0	0	0	0
TCONS_00120706	ENSG00000100744	GSKIP	0	0.038036	0	0	0	0
TCONS_00121121	ENSG00000166126	AMN	0.001716	0.01613	0	0	0	0
TCONS_00128703	ENSG00000128731	HERC2	0	0.009459	0.001235	0	0	0
TCONS_00122549	ENSG00000169926	KLF13	0	0.048553	0	0	0	0
TCONS_00129024	ENSG00000248905	FMN1	0	0.169555	0.024201	0.022053	0	0
TCONS_00129373	ENSG00000172575	RASGRP1	0	0.139485	0	0	0	0
TCONS_00130537	ENSG00000255302	EID1	0	0.094285	0.040398	0	0	0
TCONS_00131119	ENSG00000285253	AC090517.4	0	0.000511	0	0	0	0
TCONS_00131120	ENSG00000285253	AC090517.4	0	0.004313	0	0	0	0
TCONS_00131467	ENSG00000069667	RORA	0	0.073942	0	0	0	0
TCONS_00131978	ENSG00000157890	MEGF11	0	0.058541	0	0	0	0
TCONS_00132274	XLOC_053475	XLOC_053475	0.001656	0.032607	0	0	0.00817	0
TCONS_00126698	ENSG00000172379	ARNT2	0	0.252045	0.012019	0.00911	0.035566	0.017151
TCONS_00144364	XLOC_057117	XLOC_057117	0	0.110074	0	0	0	0
TCONS_00137061	ENSG00000187555	USP7	0	0.020643	0	0	0	0
TCONS_00138546	XLOC_055482	XLOC_055482	0	0.037808	0	0	0	0
TCONS_00139196	ENSG00000102886	GDPD3	0	0.164447	0	0.03435	0	0.028495
TCONS_00139279	ENSG00000180209	MYLPF	0	0.178495	0.044122	0	0	0
TCONS_00148746	ENSG00000155393	HEATR3	0	0.074456	0.002421	0	0	0.020234
TCONS_00140256	ENSG00000177200	CHD9	0	0.621775	0.00058	0.003369	0	0.227276
TCONS_00140258	ENSG00000177200	CHD9	0.015847	0.048096	0	0	0.00545	0
TCONS_00143242	XLOC_056894	XLOC_056894	0	0.00775	0.001808	0	0	0
TCONS_00163038	ENSG00000159842	ABR	0.025576	0.509987	0.177013	0	0	0.012257
TCONS_00165230	XLOC_063633	XLOC_063633	0.000861	0.086263	0	0	0.011045	0.005981
TCONS_00154787	ENSG00000072134	EPN2	0	0.041075	0	0	0	0
TCONS_00165862	XLOC_063834	XLOC_063834	0	0.006225	0	0	0	0
TCONS_00155209	XLOC_060536	XLOC_060536	0	0.075425	0	0	0	0.004772
TCONS_00155517	ENSG00000179761	PIPOX	0	0.011844	0	0	0.001443	0
TCONS_00157377	ENSG00000126562	WNK4	0	0.064697	0	0	0	0
TCONS_00157563	ENSG00000067596	DHX8	0	0.014777	0	0	0	0
TCONS_00169661	ENSG00000159224	GIP	0.027786	0.158345	0	0	0	0
TCONS_00172423	ENSG00000132475	H3F3B	0	3.31787	0	1.35784	0	0
TCONS_00172876	ENSG00000141524	TMC6	0	0.042899	0	0	0	0
TCONS_00173827	ENSG00000176155	CCDC57	0	0.046565	0	0	0.00377	0
TCONS_00174190	XLOC_066418	XLOC_066418	0	0.017511	0	0	0	0
TCONS_00178235	XLOC_068198	XLOC_068198	0	0.102574	0	0	0	0
TCONS_00174555	XLOC_066568	XLOC_066568	0.000751	0.067634	0	0	0	0.00732
TCONS_00174681	XLOC_066619	XLOC_066619	0	0.32047	0	0	0	0
TCONS_00178462	XLOC_068306	XLOC_068306	0	0.021266	0	0	0	0
TCONS_00175035	ENSG00000168675	LDLRAD4	0	0.043336	0	0	0	0
TCONS_00179512	ENSG00000186496	ZNF396	0.029819	0.115511	0.023458	0	0	0
TCONS_00180140	XLOC_069110	XLOC_069110	0	0.049089	0	0	0	0
TCONS_00176931	ENSG00000081923	ATP8B1	0	0.028918	0	0	0	0
TCONS_00184818	ENSG00000104957	CCDC130	0	0.841281	0	0.066049	0	0
TCONS_00184943	ENSG00000072071	ADGRL1	0	0.020066	0	0	0	0
TCONS_00199435	ENSG00000176401	EID2B	0	0.064644	0.014817	0	0	0
TCONS_00188868	ENSG00000142046	TMEM91	0	0.396312	0	0	0	0
TCONS_00189283	ENSG00000176472	ZNF575	0	0.125582	0	0	0.014772	0
TCONS_00201101	ENSG00000105327	BBC3	0	0.012347	0	0	0	0
TCONS_00201232	XLOC_075523	XLOC_075523	0	0.024371	0	0	0	0
TCONS_00190296	XLOC_072467	XLOC_072467	0.059673	0.536231	0	0.08855	0.084065	0
TCONS_00201236	XLOC_075523	XLOC_075523	0.026167	0.120659	0	0	0	0
TCONS_00201235	XLOC_075523	XLOC_075523	0	0.017593	0	0	0	0
TCONS_00192447	XLOC_073029	XLOC_073029	0	0.025477	0	0	0	0
TCONS_00203504	ENSG00000171649	ZIK1	0	0.072352	0	0	0	0
TCONS_00192714	ENSG00000268750	AC010522.1	0	0.174134	0	0	0.001655	0
TCONS_00204204	ENSG00000134313	KIDINS220	0	0.011637	0	0	0	0
TCONS_00205013	ENSG00000084676	NCOA1	0.002323	0.026717	0.002348	0	0	0
TCONS_00221290	XLOC_083551	XLOC_083551	0	0.092794	0	0.027432	0	0
TCONS_00221530	XLOC_083666	XLOC_083666	0	0.001633	0	0	0	0
TCONS_00221947	ENSG00000143924	EML4	0	0.084046	0	0.005047	0	0
TCONS_00207356	ENSG00000162928	PEX13	0	0.022722	0	0	0	0
TCONS_00208151	XLOC_078066	XLOC_078066	0.00637	0.033542	0	0	0	0
TCONS_00208352	ENSG00000264324	AC006030.1	0	0.071421	0	0	0	0
TCONS_00208744	XLOC_078335	XLOC_078335	0	0.07262	0	0	0	0
TCONS_00225589	XLOC_085321	XLOC_085321	0.01899	0.111768	0	0	0.007372	0
TCONS_00226315	XLOC_085591	XLOC_085591	0	0.073877	0	0	0	0
TCONS_00226639	ENSG00000153107	ANAPC1	0	0.006477	0	0	0	0
TCONS_00226744	XLOC_085791	XLOC_085791	0	0.120084	0	0	0	0
TCONS_00211336	XLOC_079452	XLOC_079452	0	0.116471	0	0	0	0
TCONS_00211967	XLOC_079755	XLOC_079755	0	0.047687	0	0	0	0
TCONS_00228481	XLOC_086680	XLOC_086680	0	0.059412	0	0.000733	0.009976	0
TCONS_00228794	ENSG00000157827	FMNL2	0	0.155005	0	0	0	0
TCONS_00228875	XLOC_086948	XLOC_086948	0	0.059221	0	0	0	0
TCONS_00213302	XLOC_080377	XLOC_080377	0	0.080878	0	0	0	0
TCONS_00229828	XLOC_087287	XLOC_087287	0	0.007704	0	0	0	0
TCONS_00229908	XLOC_087317	XLOC_087317	0	0.012375	0	0	0	0
TCONS_00214727	ENSG00000150722	PPP1R1C	0	0.077676	0	0	0	0.02805
TCONS_00215031	ENSG00000144366	GULP1	0	0.020346	0.00552	0	0	0
TCONS_00215019	ENSG00000144366	GULP1	0.011928	0.440895	0	0.016926	0.009983	0.010229
TCONS_00216357	XLOC_081678	XLOC_081678	0	0.014245	0	0	0	0
TCONS_00232297	XLOC_088324	XLOC_088324	0	0.086497	0	0	0	0
TCONS_00232522	XLOC_088450	XLOC_088450	0	0.068765	0	0	0	0
TCONS_00233027	XLOC_088606	XLOC_088606	0	0.111046	0	0.028435	0	0
TCONS_00233445	ENSG00000163053	SLC16A14	0	0.155974	0.015715	0.014019	0.001684	0.030071
TCONS_00233739	XLOC_088978	XLOC_088978	0	0.049235	0	0	0	0
TCONS_00233841	XLOC_089041	XLOC_089041	0.021535	0.099774	0	0	0	0
TCONS_00218588	XLOC_082539	XLOC_082539	0	0.027761	0	0	0	0
TCONS_00239864	ENSG00000101265	RASSF2	0	0.109806	0	0	0.008953	0
TCONS_00235384	ENSG00000172264	MACROD2	0	0.006598	0	0	0	0
TCONS_00240308	ENSG00000125864	BFSP1	0	0.048876	0	0	0	0
TCONS_00235668	ENSG00000088970	KIZ	0.005751	0.123082	0.007514	0.002107	0.000236	0.001355
TCONS_00236911	ENSG00000149633	KIAA1755	0	0.010683	0	0	0	0
TCONS_00242108	ENSG00000124143	ARHGAP40	0.005181	0.039168	0.007631	0	0	0
TCONS_00237094	XLOC_090379	XLOC_090379	0	0.01314	6.7e-05	0	0	0
TCONS_00237928	XLOC_090662	XLOC_090662	0	0.007621	0	0	0	0
TCONS_00238018	XLOC_090715	XLOC_090715	0	0.018277	0	0	0	0
TCONS_00243143	XLOC_092991	XLOC_092991	0	0.011037	0	0	0	0
TCONS_00238134	ENSG00000101096	NFATC2	0	0.110275	0	0	0	0
TCONS_00238135	ENSG00000101096	NFATC2	0	0.060176	0.001678	0	0	0
TCONS_00243159	XLOC_092999	XLOC_092999	0	0.16082	0.037814	0	0	0
TCONS_00238255	XLOC_090851	XLOC_090851	0	0.073785	0	0	0	0
TCONS_00238721	ENSG00000196227	FAM217B	0	0.621847	0.021618	0	0.050433	0.075965
TCONS_00244911	XLOC_093875	XLOC_093875	0	0.916073	0	0	0	0
TCONS_00247828	XLOC_095137	XLOC_095137	0	0.018303	0	0	0	0
TCONS_00248125	ENSG00000156299	TIAM1	0	0.180875	0.005483	0	0.006894	0
TCONS_00249251	ENSG00000160218	TRAPPC10	0.005697	0.116368	0.020114	0	0.005653	0.008253
TCONS_00246645	XLOC_094566	XLOC_094566	0	0.032015	0	0	0	0
TCONS_00252197	XLOC_096874	XLOC_096874	0	0.069906	0	0.012599	0	0
TCONS_00252210	XLOC_096893	XLOC_096893	0	0.023268	0	0	0	0
TCONS_00252318	ENSG00000221963	APOL6	0	0.209795	0	0	0	0.06318
TCONS_00256544	ENSG00000128284	APOL3	0	0.001673	0	0	0	0
TCONS_00252425	ENSG00000100368	CSF2RB	0.015144	0.071115	0	0	0	0
TCONS_00252489	XLOC_097050	XLOC_097050	0	0.115114	0	0	0.025954	0
TCONS_00270919	ENSG00000144455	SUMF1	0	1.91394	0	0.827894	0	0
TCONS_00270996	XLOC_104042	XLOC_104042	0	0.051663	0	0	0	0
TCONS_00271502	ENSG00000144560	VGLL4	0	0.010345	0	0	0.000459	0
TCONS_00271936	XLOC_104399	XLOC_104399	0	0.047601	0	0	0	0
TCONS_00272056	XLOC_104439	XLOC_104439	0	0.022168	0	0	0	0
TCONS_00272156	ENSG00000197885	NKIRAS1	0	0.075281	0	0	0	0
TCONS_00273269	XLOC_104985	XLOC_104985	0	0.023517	0	0	0	0
TCONS_00275509	XLOC_105559	XLOC_105559	0	0.038361	0	0	0.014514	0
TCONS_00275397	ENSG00000168297	PXK	0	0.087237	0	0	0	0
TCONS_00275612	ENSG00000188817	SNTN	0	0.000191	0	0	0	0
TCONS_00276048	XLOC_105757	XLOC_105757	0	0.031395	0.0125	0	0	0
TCONS_00263671	XLOC_100841	XLOC_100841	0	0.071183	0	0	0.022518	0
TCONS_00263716	ENSG00000144736	SHQ1	0.011797	0.071302	0	0	0	0
TCONS_00263791	XLOC_100911	XLOC_100911	0	0.149769	0	0	0	0
TCONS_00276369	XLOC_105961	XLOC_105961	0	0.07866	0	0	0	0
TCONS_00264011	XLOC_101058	XLOC_101058	0	0.020299	0	0	0	0
TCONS_00276710	ENSG00000154165	GPR15	0.001851	0.090195	0	0	0	0
TCONS_00276815	ENSG00000168386	FILIP1L	0	0.338189	0	0	0	0.095943
TCONS_00264729	XLOC_101456	XLOC_101456	0	0.011847	0	0	0	0
TCONS_00277104	XLOC_106424	XLOC_106424	0.006002	0.068751	0.009158	0	0	0
TCONS_00277183	XLOC_106523	XLOC_106523	0	0.014597	0	0	0	0
TCONS_00278948	ENSG00000172765	TMCC1	0	0.139081	0	0	0	0.002016
TCONS_00280352	XLOC_107860	XLOC_107860	0	0.02197	0	0	0	0
TCONS_00268425	XLOC_103083	XLOC_103083	0	0.095139	0	0	0	0
TCONS_00269981	XLOC_103650	XLOC_103650	0.0068	0.163496	0	0	0.013189	0.040229
TCONS_00270344	ENSG00000173950	XXYLT1	0	0.096463	0	0	0	0
TCONS_00282748	ENSG00000145113	MUC4	0	0.010684	0	0	0	0
TCONS_00292134	ENSG00000163945	UVSSA	0	0.142684	0	0	0	0
TCONS_00292732	XLOC_113363	XLOC_113363	0.020808	0.13887	0.006248	0.001432	0.007056	0.017308
TCONS_00293101	XLOC_113619	XLOC_113619	0	8.9e-05	0	0	0	0
TCONS_00293103	XLOC_113619	XLOC_113619	0	0.021661	0	0	0	0
TCONS_00284816	XLOC_109604	XLOC_109604	0	0.017407	0	0	0	0
TCONS_00285325	XLOC_109880	XLOC_109880	0	0.023571	0	0	0	0
TCONS_00285797	ENSG00000183783	KCTD8	0.015662	0.080382	0	0	0.012776	0
TCONS_00294328	XLOC_114241	XLOC_114241	0.001202	0.006811	0	0	0	0
TCONS_00285788	XLOC_110080	XLOC_110080	0	0.112608	0	0	0	0
TCONS_00294444	ENSG00000145246	ATP10D	0	0.007924	0	0	0	0
TCONS_00286249	XLOC_110305	XLOC_110305	0	0.016724	0	0	0	0
TCONS_00286496	ENSG00000150471	ADGRL3	0	0.043571	0	0	0	0.009843
TCONS_00295110	ENSG00000145242	EPHA5	0	0.237818	0	0	0	0
TCONS_00295250	ENSG00000171234	UGT2B7	0	0.001527	0	0	0	0
TCONS_00287250	ENSG00000138759	FRAS1	0.006441	0.278955	0.004704	0	0	0
TCONS_00287361	ENSG00000138675	FGF5	0.015806	0.180284	0.025845	0.000402	9.3e-05	0.008659
TCONS_00296578	ENSG00000138642	HERC6	0	0.00967	0	0	0	0
TCONS_00296579	ENSG00000138642	HERC6	0	0.011418	0	0	0	0
TCONS_00296581	ENSG00000138642	HERC6	0	0.011527	0	0	0	0
TCONS_00297455	XLOC_115517	XLOC_115517	0	0.121764	0	0	0	0
TCONS_00298015	XLOC_115823	XLOC_115823	0	0.079508	0.027178	0	0	0
TCONS_00298064	XLOC_115861	XLOC_115861	0	0.010874	0	0	0	0
TCONS_00298191	XLOC_115908	XLOC_115908	0	0.053532	0	0.02141	0	0
TCONS_00289785	ENSG00000109458	GAB1	0.014911	0.216873	0.00514	0.014717	0.015259	0.004765
TCONS_00290185	XLOC_112163	XLOC_112163	0	0.012512	0	0	0	0
TCONS_00290289	XLOC_112195	XLOC_112195	0	0.083318	0	0	0	0
TCONS_00299196	XLOC_116352	XLOC_116352	0	0.084621	0.026291	0	0.009839	0.000594
TCONS_00299886	ENSG00000150627	WDR17	0.021587	0.136776	0	0	0	0
TCONS_00291384	XLOC_112781	XLOC_112781	0	0.023347	0	0	0	0
TCONS_00291283	XLOC_112682	XLOC_112682	0	0.140194	0	0	0	0
TCONS_00291454	XLOC_112817	XLOC_112817	0	0.033259	0	0	0	0
TCONS_00300750	XLOC_117133	XLOC_117133	0	0.006892	0	0	0	0
TCONS_00301287	XLOC_117435	XLOC_117435	0	0.152395	0	0	0	0
TCONS_00312266	XLOC_122416	XLOC_122416	0	0.047019	0	0.008121	0	0
TCONS_00312823	ENSG00000082213	C5orf22	0	0.121358	0	0	0	0
TCONS_00313492	XLOC_123093	XLOC_123093	0.020317	0.15939	0	0	0	0
TCONS_00313862	XLOC_123271	XLOC_123271	0.005803	0.139148	0.015229	0	0	2e-06
TCONS_00314104	ENSG00000164283	ESM1	0	0.167615	0.015882	0.014467	0	0
TCONS_00303641	XLOC_118724	XLOC_118724	0.017057	0.086496	0	0	0	0
TCONS_00303638	XLOC_118723	XLOC_118723	0.019077	0.071653	0	0.010732	0	0
TCONS_00304372	ENSG00000145700	ANKRD31	0	0.057648	0	0	0	0
TCONS_00316063	XLOC_124448	XLOC_124448	0	0.057004	0	0	0	0
TCONS_00305477	XLOC_119501	XLOC_119501	0	0.056681	0.017487	0	0	0
TCONS_00316444	XLOC_124598	XLOC_124598	0	0.07073	0	0	0	0.000715
TCONS_00305572	ENSG00000175449	RFESD	0	0.021445	0	0	0	0
TCONS_00316929	XLOC_124851	XLOC_124851	0	0.028619	0	0	0	0.012212
TCONS_00305914	XLOC_119744	XLOC_119744	0	0.022157	0	0	0	0
TCONS_00305912	XLOC_119744	XLOC_119744	0	0.008195	0	0	0	5e-06
TCONS_00317948	XLOC_125483	XLOC_125483	0.000244	0.019673	0	0	0.000308	0
TCONS_00307208	XLOC_120416	XLOC_120416	0	0.019754	0.004529	0	0	0
TCONS_00308674	XLOC_120908	XLOC_120908	0	0.001039	0	0	0	0
TCONS_00308712	ENSG00000183775	KCTD16	0	0.140982	0	0	0	0
TCONS_00309191	ENSG00000196743	GM2A	0	0.07407	0	0	0	0
TCONS_00309197	ENSG00000196743	GM2A	0	0.031108	0	0	0	0
TCONS_00320312	XLOC_126426	XLOC_126426	0	0.102092	0.02595	0	0	0
TCONS_00320328	XLOC_126441	XLOC_126441	0	0.113337	0	0	0	0
TCONS_00309499	XLOC_121250	XLOC_121250	0	0.090769	0	0	0	0
TCONS_00310361	XLOC_121616	XLOC_121616	0	0.03658	0	0	0	0
TCONS_00321271	XLOC_126940	XLOC_126940	0	0.000467	0	0	0	0
TCONS_00322197	ENSG00000196670	ZFP62	0	0.080314	0	0	0	0
TCONS_00322194	ENSG00000196670	ZFP62	0.000726	0.108301	0	0.005363	0.011594	0
TCONS_00322762	XLOC_127498	XLOC_127498	0	0.02235	0	0	0	0
TCONS_00322851	ENSG00000096696	DSP	0	0.103192	0	0	0	0.017165
TCONS_00322855	ENSG00000096696	DSP	0.019267	0.075837	0.003364	0.00378	0.003895	5.7e-05
TCONS_00334228	ENSG00000124788	ATXN1	0	0.002434	0	0	0	0
TCONS_00323814	XLOC_128030	XLOC_128030	0.002744	0.033916	0	0	0	0
TCONS_00336508	ENSG00000146197	SCUBE3	0	0.074409	0.01939	0	0	0
TCONS_00336759	ENSG00000112139	MDGA1	0	0.000449	0	0	0	0
TCONS_00326922	XLOC_129205	XLOC_129205	0.014283	0.05214	0	0	0	0
TCONS_00337544	XLOC_134559	XLOC_134559	0	0.109121	0.008536	0	0	0
TCONS_00327238	ENSG00000243955	GSTA1	0	0.136083	0	0	0	0
TCONS_00328546	XLOC_130186	XLOC_130186	0	0.142544	0	0	0	0
TCONS_00328710	XLOC_130263	XLOC_130263	0.005057	0.0474	0	0	0	0.001813
TCONS_00329060	XLOC_130480	XLOC_130480	0	0.018431	0.002751	0	0	0
TCONS_00339763	XLOC_135767	XLOC_135767	0	0.023369	0	0	0	0.002394
TCONS_00340296	XLOC_136063	XLOC_136063	0	0.048326	0	0	0	0
TCONS_00340696	ENSG00000249853	HS3ST5	0	0.093641	0	0	0	0
TCONS_00330296	ENSG00000164465	DCBLD1	0	0.027703	0	0.009502	0	0
TCONS_00330321	XLOC_131183	XLOC_131183	0	0.023932	0	0	0	0.00479
TCONS_00331191	ENSG00000171408	PDE7B	0	0.104569	0.004921	0	0	0
TCONS_00331414	XLOC_131787	XLOC_131787	0	0.014273	0	0	0	0
TCONS_00331575	ENSG00000010818	HIVEP2	0	0.143561	0	0.010007	0.036331	0
TCONS_00331585	ENSG00000146416	AIG1	0.055435	5.97415	0.006105	0.000879	0.000883	0.76746
TCONS_00342770	ENSG00000120254	MTHFD1L	0	0.073155	0.007145	0.008685	0.006903	0.006013
TCONS_00353994	XLOC_141816	XLOC_141816	0	0.008063	0	0	0	0
TCONS_00344141	ENSG00000146555	SDK1	0	0.013373	0	0	0	0
TCONS_00344134	ENSG00000146555	SDK1	0	0.272463	0	0	0	0
TCONS_00354452	ENSG00000106346	USP42	0	0.018317	0	0	0	0
TCONS_00344340	ENSG00000122512	PMS2	0	0.002348	0	0	0	0
TCONS_00355331	ENSG00000070882	OSBPL3	0	0.028687	0	0	0.001066	0
TCONS_00346277	ENSG00000002746	HECW1	0	0.157559	0	0	0	0.003765
TCONS_00357290	XLOC_143241	XLOC_143241	0	0.032062	0	0	0	0
TCONS_00357674	XLOC_143441	XLOC_143441	0	0.070813	0	0	0	0
TCONS_00358319	ENSG00000127946	HIP1	0	0.045155	0	0.004226	0	0
TCONS_00348804	XLOC_139853	XLOC_139853	0	0.016513	0	0	0	0
TCONS_00360181	XLOC_144293	XLOC_144293	0	0.030817	0	0	0	0
TCONS_00350339	XLOC_140344	XLOC_140344	0	0.031394	0	0	0	0
TCONS_00360903	ENSG00000184903	IMMP2L	0	0.664241	0	0	0	0
TCONS_00360904	ENSG00000184903	IMMP2L	0	0.189557	0	0	0	0
TCONS_00350881	ENSG00000105971	CAV2	0	0.003567	0	0	0	0
TCONS_00350895	ENSG00000105971	CAV2	0	0.005444	0	0	0	0
TCONS_00351850	XLOC_140889	XLOC_140889	0	0.01901	0	0	0	0
TCONS_00351943	ENSG00000205060	SLC35B4	0	0.131927	0	0	0	0
TCONS_00352088	ENSG00000189320	FAM180A	0	0.045393	0	0.003871	0	0
TCONS_00362663	XLOC_145365	XLOC_145365	0	0.096704	0	0	0	0
TCONS_00363415	XLOC_145661	XLOC_145661	0.012793	0.166624	0.000153	0	0.024051	0.017685
TCONS_00373188	XLOC_149983	XLOC_149983	0	0.104197	0	0	0	0
TCONS_00365411	ENSG00000171320	ESCO2	0	0.017184	0	0	0	0
TCONS_00365478	ENSG00000012232	EXTL3	0	0.085485	0	0	0	0
TCONS_00373837	XLOC_150303	XLOC_150303	0.018263	0.145713	0.016072	0	0	0.002163
TCONS_00366997	ENSG00000104237	RP1	0	0.034787	0	0.015112	0	0
TCONS_00368555	XLOC_147982	XLOC_147982	0	0.117611	0	0	0	0
TCONS_00368980	ENSG00000156170	NDUFAF6	0	0.018762	0	0	0	0
TCONS_00378133	XLOC_152460	XLOC_152460	0	0.093752	0.008024	0	0	0.027693
TCONS_00378353	ENSG00000177570	SAMD12	0.009451	0.070957	0	0	0	0
TCONS_00370102	XLOC_148746	XLOC_148746	0	0.05693	0	0	0	0
TCONS_00370163	XLOC_148787	XLOC_148787	0	0.097473	0	0	0	0
TCONS_00370150	XLOC_148777	XLOC_148777	0	0.251072	0	0.000111	0	0
TCONS_00370201	ENSG00000156787	TBC1D31	0	0.195874	0	0	0	0
TCONS_00379139	XLOC_152965	XLOC_152965	0.013058	0.101695	0	0	0	0
TCONS_00379179	ENSG00000184156	KCNQ3	0	0.008268	0	0	0	0
TCONS_00379185	ENSG00000184156	KCNQ3	0	0.018531	0	0	0	0
TCONS_00379182	ENSG00000184156	KCNQ3	0	0.098208	0	0	0	0
TCONS_00389986	ENSG00000198642	KLHL9	0	0.013322	0	0	0	0
TCONS_00389987	ENSG00000198642	KLHL9	0	0.097001	0	0	0	0
TCONS_00390343	XLOC_157937	XLOC_157937	0.003567	0.272379	0.079609	0	0.006818	0.011803
TCONS_00390515	XLOC_158095	XLOC_158095	0.038816	0.155848	0.004343	0.005315	0	0.004997
TCONS_00390514	XLOC_158095	XLOC_158095	0	0.098186	0	0.007993	0	0
TCONS_00382140	XLOC_154292	XLOC_154292	0	0.006021	0	0	0	0
TCONS_00382175	ENSG00000107201	DDX58	0	0.101059	0	0	0	0
TCONS_00391433	XLOC_158524	XLOC_158524	0	0.036898	0	0	0	0
TCONS_00383347	XLOC_154884	XLOC_154884	0	0.161042	0	0	0	0.010994
TCONS_00392345	XLOC_159062	XLOC_159062	0	0.071569	0	0	0	0
TCONS_00392462	XLOC_159130	XLOC_159130	0	0.112833	0	0	0	0
TCONS_00384012	XLOC_155181	XLOC_155181	0	0.149215	0	0.019149	0	0
TCONS_00384013	XLOC_155181	XLOC_155181	0	0.091793	0	0	0	0
TCONS_00392587	XLOC_159217	XLOC_159217	0	4.9e-05	0	0	0	0
TCONS_00393370	XLOC_159616	XLOC_159616	0	0.103239	0	0	0	0.040918
TCONS_00384873	ENSG00000158079	PTPDC1	0.029425	0.61109	0	0.012554	0.011362	0
TCONS_00384925	ENSG00000130950	NUTM2F	0	0.112428	0	0.020033	0	0
TCONS_00385750	XLOC_156099	XLOC_156099	0.009744	0.042871	0	0	0	0
TCONS_00385801	XLOC_156136	XLOC_156136	0	0.036589	0	0	0	0
TCONS_00395270	ENSG00000011454	RABGAP1	0	0.001995	0	0	0	0
TCONS_00387515	XLOC_156815	XLOC_156815	0	0.078495	0.008682	0	0	0
TCONS_00397399	XLOC_161357	XLOC_161357	0	0.010544	0	0	0	0
TCONS_00397398	XLOC_161357	XLOC_161357	0	0.057399	0.009645	0	0.011884	0
TCONS_00404488	XLOC_164819	XLOC_164819	0	0.030864	0.009014	0	0	0
TCONS_00397862	ENSG00000073464	CLCN4	0.017845	0.17497	0.012702	0.02119	0	0.018022
TCONS_00397962	ENSG00000169933	FRMPD4	0.010197	0.129231	0.002817	0	0	0
TCONS_00404951	ENSG00000101916	TLR8	0	0.027159	0	0	0	0
TCONS_00399268	XLOC_162268	XLOC_162268	0	0.039603	0	0	0	0
TCONS_00400111	XLOC_162585	XLOC_162585	0	0.013804	0	0	0	0
TCONS_00401611	XLOC_163494	XLOC_163494	0	0.011032	0	0	0	0
TCONS_00403023	XLOC_164212	XLOC_164212	0	0.075373	0	0.023077	0	0
TCONS_00403048	ENSG00000156709	AIFM1	0	0.039602	0	0	0.011115	0
TCONS_00403487	XLOC_164430	XLOC_164430	0	0.045885	0	0	0	0
TCONS_00410569	XLOC_168094	XLOC_168094	0	0.087226	0	0	0	0.005783
TCONS_00403690	ENSG00000013619	MAMLD1	0	0.068835	0	0	0.008016	0.018565
TCONS_00403850	ENSG00000268916	CSAG3	0	0.011895	0	0	0	0
TCONS_00410834	XLOC_168203	XLOC_168203	0	0.273232	0	0	0	0
TCONS_00404273	XLOC_164719	XLOC_164719	0	0.030218	0	0	0	0
TCONS_00000704	XLOC_000517	XLOC_000517	0	0.087909	0	0	0	0
TCONS_00000912	XLOC_000653	XLOC_000653	0	0.002667	0	0	0	0
TCONS_00000116	XLOC_000082	XLOC_000082	0.030064	0.1136	0	0	0	0.007257
TCONS_00000220	XLOC_000146	XLOC_000146	0	0.027357	0	0	0	0
TCONS_00000182	XLOC_000123	XLOC_000123	0.013751	0.071949	0.019344	0	0	0
TCONS_00000824	XLOC_000608	XLOC_000608	0	9.28571	0	0	0	0
TCONS_00000821	XLOC_000608	XLOC_000608	0	0.447146	0.039065	0.105882	0.045171	0.005983
TCONS_00000860	XLOC_000615	XLOC_000615	1.87905	151.52	0.033478	0.018837	0.034601	0.026536
TCONS_00022864	XLOC_009258	XLOC_009258	0.016766	0.12146	0	0	0	0
TCONS_00022928	XLOC_009302	XLOC_009302	0	0.019029	0	0	0	0
TCONS_00009582	XLOC_003945	XLOC_003945	0	0.033032	0	0	0	0
TCONS_00010371	XLOC_004294	XLOC_004294	0	0.164122	0	0	0.024466	0
TCONS_00011982	XLOC_004949	XLOC_004949	0	0.07429	0.016464	0	0	0
TCONS_00034795	ENSG00000152092	ASTN1	0	0.004736	0	0	0	0
TCONS_00035184	XLOC_014067	XLOC_014067	0	0.05311	0	0	0	0.019732
TCONS_00016144	XLOC_006459	XLOC_006459	0	0.049467	0	0	0	0
TCONS_00018207	XLOC_007371	XLOC_007371	0	0.131464	0	0	0	0
TCONS_00048199	XLOC_020167	XLOC_020167	0	0.022894	0	0	0	0
TCONS_00040388	XLOC_016623	XLOC_016623	0	0.016315	0	0	0	0
TCONS_00040401	ENSG00000204740	MALRD1	0	0.007514	0	0	0	0
TCONS_00044253	XLOC_018440	XLOC_018440	0	0.108411	0	0	0	0
TCONS_00060822	ENSG00000175513	TSGA10IP	0	0.005869	0	0	0	0
TCONS_00073109	XLOC_029743	XLOC_029743	0	0.007302	0	0	0	0
TCONS_00065387	XLOC_027004	XLOC_027004	0	0.113462	0	0	0	0
TCONS_00091409	XLOC_036680	XLOC_036680	0	0.034756	0	0	0	0
TCONS_00096026	XLOC_038574	XLOC_038574	0	0.018365	0	0	0	0
TCONS_00097195	XLOC_039064	XLOC_039064	0	0.094127	0	0	0	0
TCONS_00100893	XLOC_040500	XLOC_040500	0	0.117743	0	0	0	0
TCONS_00102728	XLOC_041429	XLOC_041429	0	0.070468	0	0	0	0
TCONS_00124736	ENSG00000171956	FOXB1	0	0.018119	0	0	0	0
TCONS_00148434	XLOC_058313	XLOC_058313	0	0.046225	0	0.011938	0	0
TCONS_00164903	XLOC_063542	XLOC_063542	0	0.015587	0	0	0	0
TCONS_00155360	XLOC_060576	XLOC_060576	0	0.022407	0	0	0	0.008314
TCONS_00171797	XLOC_065808	XLOC_065808	0	0.032771	0	0	0	0
TCONS_00178273	XLOC_068216	XLOC_068216	0	0.011645	0	0	0	0
TCONS_00174685	XLOC_066622	XLOC_066622	0	0.075148	0	0	0	0
TCONS_00177505	XLOC_067910	XLOC_067910	0	0.043037	0	0	0	0
TCONS_00203860	XLOC_076195	XLOC_076195	0	0.071178	0	0	0	0
TCONS_00220333	XLOC_083172	XLOC_083172	0	0.049021	0	0	0	0
TCONS_00204881	XLOC_076741	XLOC_076741	0	0.036916	0	0.015702	0	0
TCONS_00222769	XLOC_084161	XLOC_084161	0	0.10488	0.033271	0	0	0
TCONS_00210701	XLOC_079217	XLOC_079217	0	0.05765	0	0	0	0
TCONS_00212854	XLOC_080129	XLOC_080129	0	0.094341	0	0	0	0
TCONS_00228573	XLOC_086820	XLOC_086820	0	0.017133	0	0	0	0
TCONS_00228826	XLOC_086910	XLOC_086910	0.018625	0.117891	0	0	0	0
TCONS_00213221	XLOC_080316	XLOC_080316	0	0.013939	0	0	0	0
TCONS_00213255	XLOC_080346	XLOC_080346	0	0.100977	0	0	0	0
TCONS_00231188	XLOC_087929	XLOC_087929	0	0.009597	0	0	0	0
TCONS_00216354	XLOC_081676	XLOC_081676	0	0.032376	0	0	0	0
TCONS_00242351	XLOC_092628	XLOC_092628	0	0.021856	0	0	0	0
TCONS_00245289	ENSG00000184032	KRTAP20-2	0	0.013273	0	0	0	0
TCONS_00255618	XLOC_098185	XLOC_098185	0	0.076687	0	0	0	0
TCONS_00255946	XLOC_098301	XLOC_098301	0	0.135352	0	0	0.01419	0
TCONS_00253373	XLOC_097342	XLOC_097342	0	0.078495	0	0	0	0
TCONS_00253423	XLOC_097350	XLOC_097350	0	0.077804	0	0	0.01965	0
TCONS_00277213	XLOC_106530	XLOC_106530	0	0.07173	0.010086	0.021482	0	0
TCONS_00277356	XLOC_106601	XLOC_106601	0	0.082381	0	0	0	0
TCONS_00281067	XLOC_108191	XLOC_108191	0.019451	0.102701	0	0	0	0
TCONS_00292473	XLOC_113238	XLOC_113238	0	0.069706	0	0	0	0
TCONS_00293653	XLOC_113879	XLOC_113879	0	0.049255	0	0	0.018134	0
TCONS_00294371	XLOC_114282	XLOC_114282	0	0.077042	0	0	0	0
TCONS_00289512	XLOC_111807	XLOC_111807	0	0.10147	0	0	0	0
TCONS_00312597	XLOC_122614	XLOC_122614	0	0.071457	0	0	0	0
TCONS_00313149	XLOC_122958	XLOC_122958	0	0.143405	0.016275	0	0	0
TCONS_00314906	XLOC_123841	XLOC_123841	0	0.081975	0	0	0	0
TCONS_00314940	XLOC_123871	XLOC_123871	0	0.030038	0	0	0	0
TCONS_00316459	XLOC_124610	XLOC_124610	0	0.011398	0	0	0	0
TCONS_00305938	XLOC_119768	XLOC_119768	0	0.088961	0	0	0	0
TCONS_00327006	ENSG00000153292	ADGRF1	0	0.062875	0	0	0	0
TCONS_00339840	XLOC_135848	XLOC_135848	0	0.071115	0	0	0	0
TCONS_00340035	XLOC_135961	XLOC_135961	0	0.070215	0	0	0	0
TCONS_00346884	XLOC_138960	XLOC_138960	0	0.02811	0	0	0	0
TCONS_00347121	XLOC_139113	XLOC_139113	0	0.078127	0	0	0	0
TCONS_00357809	ENSG00000183166	CALN1	0	0.027874	0	0	0	0
TCONS_00347958	XLOC_139542	XLOC_139542	0	0.02628	0	0	0	0
TCONS_00361526	XLOC_144854	XLOC_144854	0.011335	0.049687	0	0.008486	0	0
TCONS_00373762	XLOC_150246	XLOC_150246	0	0.03254	0	0	0	0
TCONS_00366262	XLOC_146780	XLOC_146780	0	0.048469	0	0.020306	0	0
TCONS_00368146	XLOC_147730	XLOC_147730	0	0.018407	0	0	0	0
TCONS_00369365	XLOC_148363	XLOC_148363	0	0.012718	0	0	0	0
TCONS_00370120	XLOC_148764	XLOC_148764	0	0.02412	0	0	0	0
TCONS_00389136	XLOC_157318	XLOC_157318	0	0.024443	0	0	0	0
TCONS_00389209	XLOC_157373	XLOC_157373	0	0.021991	0	0	0	0
TCONS_00384209	XLOC_155318	XLOC_155318	0	0.080229	0	0	0	0
TCONS_00385823	XLOC_156152	XLOC_156152	0.008	0.026232	0	0	0	0
TCONS_00386400	XLOC_156504	XLOC_156504	0	0.015659	0	0	0	0
TCONS_00388494	XLOC_157138	XLOC_157138	0	0.071084	0	0	0	0
TCONS_00409247	XLOC_167262	XLOC_167262	0	0.018867	0	0	0	0
TCONS_00412431	XLOC_168959	XLOC_168959	0	0.083205	0	0	0	0
ENST00000453732	ENSG00000230415	LINC01786	0.029923	0.034414	0.020258	0.014665	0.014654	0.027363
ENST00000625027	ENSG00000204464	C1orf195	0.017867	0.056225	0.038944	0.011777	0	0.044585
ENST00000453804	ENSG00000237938	AL450998.3	0.013001	0.0387	0.000221	0.003304	0.000705	0.013447
ENST00000437367	ENSG00000249087	ZNF436-AS1	0.021072	0.193436	0.037441	0.050371	0.03226	0.125475
ENST00000648327	ENSG00000197989	SNHG12	0.012995	0.019097	1.7e-05	1.3e-05	1.3e-05	0.016848
ENST00000456582	ENSG00000235501	AC105942.1	0.005959	0.017517	0.013459	0.006515	0.007651	0.018456
ENST00000619867	ENSG00000278811	LINC00624	0	0.008068	0.003343	0	0	0.008386
ENST00000601909	ENSG00000269489	AL589765.6	0.012821	0.057188	0	0.003937	0	0.017907
ENST00000635660	ENSG00000282849	AL359834.1	0.114082	0.291331	0.017102	0	0	0.184805
ENST00000608023	ENSG00000203709	MIR29B2CHG	0.013994	0.030863	0.015299	0.010486	0.013789	0.029991
ENST00000612055	ENSG00000277007	AC096642.1	0.003014	0.009517	0.006538	0.004001	0	0.011295
ENST00000457955	ENSG00000228106	AL392172.1	0.061723	0.176079	0.041731	0	0	0.112574
ENST00000429269	ENSG00000224939	LINC00184	0.024298	0.053211	0.026325	0.018874	0.016179	0.029182
ENST00000634899	ENSG00000225383	SFTA1P	0.006609	0.088055	0	0	0.008047	0.071513
ENST00000464584	ENSG00000240294	RN7SKP241	0.014743	0.044936	0.014602	0.016978	0.013542	0.016199
ENST00000605499	ENSG00000271335	AL117336.2	0.017577	0.045836	0	0	0	0.048185
ENST00000456104	ENSG00000223482	NUTM2A-AS1	0.03941	0.189875	0.110916	0.080372	0.039434	0.132321
ENST00000454270	ENSG00000234452	SLC16A12-AS1	0	0.011364	0	0	0	0.011725
ENST00000524947	ENSG00000233930	KRTAP5-AS1	0	0.036673	0.011469	0	0.006505	0.025435
ENST00000533634	ENSG00000254951	AC044810.2	0.01403	0.090821	0.02423	0	0.042989	0.058071
ENST00000533002	ENSG00000254670	AC084859.1	0.02761	0.110982	0	0.007804	0	0.098979
ENST00000540410	ENSG00000256897	AC018410.2	0	0.018652	0	0	0	0.021654
ENST00000531602	ENSG00000255468	AP001107.9	0.002811	0.028262	0.004106	0.001989	0.000564	0.014038
ENST00000546324	ENSG00000257038	AP002761.3	0.073398	0.56635	0.377647	0.158908	0	0.451208
ENST00000501397	ENSG00000248027	AP001351.1	0.015921	0.08084	0.057995	0.022391	0.01286	0.052496
ENST00000531681	ENSG00000254710	AP001970.1	0	0.007086	0	0	0	0.00388
ENST00000354425	ENSG00000203593	AC005342.1	0	0.026456	0	0	0	0.023444
ENST00000620496	ENSG00000275476	AC009318.4	0.006539	0.034241	0.017583	0	0	0.019824
ENST00000547866	ENSG00000257913	DDN-AS1	0	0.030554	0.007913	0	0	0.022462
ENST00000550636	ENSG00000258135	LINC02396	0	0.014321	0	0	0	0.012691
ENST00000639627	ENSG00000257137	C12orf80	0	0.013617	0.003502	0	0	0.013926
ENST00000545750	ENSG00000255866	AC090023.1	0	0.033903	0	0	0	0.022192
ENST00000502102	ENSG00000247363	AC090061.1	0	0.005802	0	0	0	0.006785
ENST00000617300	ENSG00000273987	AC121761.2	0.040026	0.073142	0.003762	0	0.029089	0.052317
ENST00000537157	ENSG00000212694	LINC01089	0.126241	0.492126	0.296171	0	0.181102	0.308973
ENST00000610631	ENSG00000274427	AC145423.2	0.020419	0.031494	0.014869	0.007119	0.003832	0.024498
ENST00000648233	ENSG00000285840	AL353648.1	0	0.008305	0	0	0	0.006813
ENST00000604480	ENSG00000270522	AL162713.1	0.001775	0.038744	0.001942	0.000923	0.005661	0.016814
ENST00000454605	ENSG00000233672	RNASEH2B-AS1	0.010136	0.039493	0.008882	0.006221	0	0.043411
ENST00000615349	ENSG00000276957	AL158063.1	0.006419	0.057799	0.014508	0	0.017685	0.027512
ENST00000435024	ENSG00000233532	LINC00460	0.061166	0.118427	0.07995	0.022578	0.049457	0.071708
ENST00000444865	ENSG00000233532	LINC00460	0.214512	0.639415	0.492089	0.213554	0.326216	0.447247
ENST00000553657	ENSG00000257621	PSMA3-AS1	0.607609	0.803601	0.562165	0.288245	0.431147	0.607621
ENST00000647580	ENSG00000285966	AC007686.4	0.013838	0.05773	0.024012	0	0.014743	0.037972
ENST00000500487	ENSG00000247765	AC068446.2	0.00994	0.025247	0	0.006338	0	0.011011
ENST00000559292	ENSG00000259448	LINC02352	0.010538	0.016543	0	0	0	0.013067
ENST00000558441	ENSG00000259721	AC090877.2	0.241093	0.477632	0.319124	0.198904	0.211012	0.256954
ENST00000434223	ENSG00000236914	LINC01852	0.079528	0.239947	0.076376	0	0.073911	0.094549
ENST00000559232	ENSG00000236914	LINC01852	0.018873	0.051939	0.029029	0.009049	0	0.040105
ENST00000558245	ENSG00000259447	AC013652.2	0.000533	0.020311	0	0	0	0.018558
ENST00000561289	ENSG00000244879	GABPB1-AS1	0	0.084999	0	0	0	0.04672
ENST00000648659	ENSG00000259672	AC087612.1	0	0.014177	0	0	0	0.012647
ENST00000563004	ENSG00000261634	AC026992.2	0.018914	0.0489	0.003532	0	0.00095	0.016148
ENST00000499217	ENSG00000247240	UBL7-AS1	0.254604	0.294776	0.212653	0	0.100901	0.175524
ENST00000650320	ENSG00000259763	LINC02157	0	0.005354	0	0	0	0.005878
ENST00000558188	ENSG00000259363	AC090825.1	0.013734	0.024767	0.007373	0	0	0.018058
ENST00000559045	ENSG00000259553	AC140725.1	0.007384	0.013212	0	0	0	0.013067
ENST00000570700	ENSG00000263011	AC108134.4	0	0.14492	0	0	0	0.089738
ENST00000565214	ENSG00000260034	LCMT1-AS2	0.000695	0.002937	0.000707	0	0.000175	0.00347
ENST00000617035	ENSG00000274092	AC106739.1	0.049941	0.073654	0.00991	0.015959	0.01338	0.040318
ENST00000563605	ENSG00000261385	AC009088.3	0	0.046875	0	0.008104	0.020155	0.027756
ENST00000569726	ENSG00000261231	LINC02133	0.00082	0.00752	0.003254	0	0.001505	0.005064
ENST00000602592	ENSG00000270049	AC009061.2	0.022006	0.057497	0.037434	0.033027	0.02291	0.052163
ENST00000624116	ENSG00000279206	AC004943.3	0.040885	0.082882	0	0.017429	0.017489	0.022939
ENST00000614011	ENSG00000275393	AC018695.6	0.099304	0.124081	0.084491	0.043932	0.018537	0.10463
ENST00000554623	ENSG00000259006	AC092143.2	0.001947	0.0144	0.004614	0	0.006452	0.007707
ENST00000571282	ENSG00000263015	AC015853.2	0	0.023628	0.01456	0	0	0.024352
ENST00000582196	ENSG00000263709	AC024619.3	0.023444	0.084753	0.02594	0.021006	0	0.091703
ENST00000511322	ENSG00000250948	AC091180.4	0	0.017408	0	0	0	0.01753
ENST00000501718	ENSG00000247011	AC005920.1	0	0.004051	0	0	0	0.004786
ENST00000579003	ENSG00000265206	AC004687.1	0	0.007125	0	0.001468	0	0.00605
ENST00000614751	ENSG00000273982	AC005746.3	0	0.021172	0.008117	0	0	0.01084
ENST00000591313	ENSG00000267280	TBX2-AS1	1.15285	1.48835	0.655015	0.647486	0.381546	1.12454
ENST00000621223	ENSG00000274578	AC006249.1	0.162383	0.665818	0.130868	0.121892	0.150827	0.248591
ENST00000646805	ENSG00000285095	AC025887.2	0	0.00065	0	0	0	0.000376
ENST00000590604	ENSG00000267311	AC007673.1	0.004258	0.006148	0	0	0	0.005225
ENST00000613819	ENSG00000276092	AC040896.1	0.018807	0.045858	0.017839	0.021832	0.000511	0.05001
ENST00000592086	ENSG00000267169	AC022098.1	0.343861	0.728579	0	0.000244	0.320477	0.459958
ENST00000585816	ENSG00000267383	AC011447.3	0	0.017951	0	0	0	0.010605
ENST00000585917	ENSG00000267575	AC006504.5	0.01518	0.108477	0.055877	0.037082	0.037627	0.072126
ENST00000588318	ENSG00000267575	AC006504.5	0.046419	0.064851	0.043153	0	0	0.073469
ENST00000651375	ENSG00000283103	AC010642.2	0.059544	0.121469	0.00211	0.006698	0.034756	0.066746
ENST00000579267	ENSG00000264910	RN7SL525P	0.085641	1.21321	0.317085	0.182134	0.124545	0.530754
ENST00000412606	ENSG00000224184	MIR3681HG	0	0.021353	0	0	0	0.010489
ENST00000418963	ENSG00000223522	AC093690.1	0	0.005422	0	0	0	0.004659
ENST00000596663	ENSG00000233251	AC007743.1	0.178987	0.576471	0.381983	0.167622	0.191154	0.619051
ENST00000646386	ENSG00000222041	CYTOR	0.064473	0.724642	0.058065	0.258797	0.250297	0.341942
ENST00000612530	ENSG00000277628	RF00017	0	0.026091	0	0	0	0.030827
ENST00000419902	ENSG00000236859	NIFK-AS1	0.006528	0.021207	0.006558	0.000644	0	0.013142
ENST00000651100	ENSG00000286068	AC010974.2	0.012366	0.025071	0.009755	0	0	0.036223
ENST00000606428	ENSG00000226953	NCKAP5-AS2	0.006042	0.309017	0.087611	0.043391	0.061382	0.217344
ENST00000414911	ENSG00000228043	AC114763.1	0.003354	0.007842	0.00272	0	0	0.004513
ENST00000611242	ENSG00000278153	AL121782.1	0	0.040293	0.020621	0.012323	0	0.043164
ENST00000570096	ENSG00000261431	AL023803.1	0.95086	2.56201	1.77224	1.03624	1.10881	1.91116
ENST00000412500	ENSG00000228705	LINC00659	0.012459	0.127224	0.007859	0	0.019179	0.050793
ENST00000453549	ENSG00000227256	MIS18A-AS1	0.034289	0.077878	0.030319	0.024941	0.014354	0.068738
ENST00000427188	ENSG00000185186	LINC00313	0	0.009756	0	0	0	0.006019
ENST00000623789	ENSG00000278920	AC005005.4	0.002779	0.007264	0.001241	0.00206	0.001375	0.00416
ENST00000615017	ENSG00000235831	BHLHE40-AS1	0.005419	0.035077	0	0	0	0.031956
ENST00000621000	ENSG00000206567	AC022007.1	0.013321	0.026539	0.019246	0	0.003096	0.019665
ENST00000607362	ENSG00000271858	Z84492.1	0	0.143103	0	0	0.037541	0.08453
ENST00000642133	ENSG00000223812	AC073365.1	0.877716	1.94002	1.54854	0	1.07187	1.53687
ENST00000431767	ENSG00000242086	MUC20-OT1	0	0.042559	0	0	0	0.043801
ENST00000420213	ENSG00000237167	AC128709.3	0	0.080011	0	0	0	0.046908
ENST00000570786	ENSG00000263327	TAPT1-AS1	0.031965	0.093593	0	0	0.027383	0.038126
ENST00000514260	ENSG00000250846	EPHA5-AS1	0.139253	0.664443	0.180456	0.199309	0.053392	0.350669
ENST00000651702	ENSG00000272870	AC097534.2	0	0.00566	0	0	0	0.00312
ENST00000510523	ENSG00000245213	AC105285.1	0.041679	0.066002	0.029409	0.027617	0.021395	0.033006
ENST00000511052	ENSG00000177822	TENM3-AS1	0.009768	0.141283	0.011756	0.002233	0.000713	0.104037
ENST00000508986	ENSG00000249491	EGFLAM-AS1	0.00299	0.029327	0	0	0	0.029701
ENST00000648975	ENSG00000285616	AC114977.2	0.002901	0.004716	0.002421	0	0	0.004179
ENST00000606697	ENSG00000248092	NNT-AS1	0	0.109249	0	0	0	0.070474
ENST00000500258	ENSG00000248092	NNT-AS1	0	0.378314	0	0	0	0.19383
ENST00000517934	ENSG00000249069	LINC01033	0	0.003884	0	0	0	0.003748
ENST00000501886	ENSG00000247372	AC008897.2	0	0.013389	0.007165	0	0	0.015532
ENST00000648683	ENSG00000248323	LUCAT1	0	0.040137	0	0	0	0.022727
ENST00000508590	ENSG00000224032	EPB41L4A-AS1	0	0.151248	0.059688	0.060781	0	0.129094
ENST00000501652	ENSG00000245937	LINC01184	0.073457	0.136645	0.021873	0.027255	0.024578	0.067472
ENST00000620001	ENSG00000277619	AC008406.3	0.06259	0.059588	0.043969	0.028193	0.014265	0.056578
ENST00000366402	ENSG00000273549	RF00017	0	0.028482	0	0	0	0.02798
ENST00000399446	ENSG00000215022	AL008729.1	0.021684	0.045378	0	0.001916	0.008835	0.042709
ENST00000607233	ENSG00000228412	AL022068.1	0.027551	0.172503	0.115298	0	0.017086	0.111479
ENST00000453216	ENSG00000225791	TRAM2-AS1	0.000265	0.00061	0.000216	0.000183	8.6e-05	0.000673
ENST00000606558	ENSG00000225791	TRAM2-AS1	4.9e-05	0.000216	8e-05	8.2e-05	3.1e-05	0.000208
ENST00000423008	ENSG00000229043	AC091729.3	0.032119	0.141705	0	0	0.050928	0.064614
ENST00000609813	ENSG00000272719	AC006483.2	0.116176	0.14126	0.062609	0.029308	0.038306	0.086347
ENST00000518848	ENSG00000254369	HOXA-AS3	0	0.005971	0	0	0	0.005656
ENST00000521101	ENSG00000253632	AC084026.2	0	0.021237	0	0	0	0.01792
ENST00000607047	ENSG00000272092	AC087623.2	0.02513	0.326514	0.044017	0.037345	0.129812	0.24085
ENST00000563810	ENSG00000260588	AC027702.1	0.022258	0.037607	0.016865	0.017724	0.011718	0.024994
ENST00000526470	ENSG00000228862	AC068389.1	0	0.004669	0	0	0	0.002758
ENST00000649904	ENSG00000285971	AC023095.1	0	0.003123	0	0	0	0.003124
ENST00000521872	ENSG00000253596	AC103952.1	0	0.048787	0	0	0	0.042842
ENST00000520820	ENSG00000246263	UBR5-AS1	0.146881	0.340801	0.046821	0.044562	0.038296	0.113647
ENST00000421632	ENSG00000240498	CDKN2B-AS1	0.000729	0.022133	0.016381	0.011017	0.004948	0.01953
ENST00000643286	ENSG00000240498	CDKN2B-AS1	0.030841	0.095645	0.060471	0.049629	0.045506	0.08389
ENST00000457720	ENSG00000230013	AL359182.2	0.011736	0.038986	0.025277	0	0.01538	0.05182
ENST00000421614	ENSG00000228317	AL158070.1	0.019441	0.048001	0.00894	0	0	0.026862
ENST00000607259	ENSG00000271833	AL445222.1	0.101169	0.141767	0.028574	0.016652	0.048011	0.086516
ENST00000590504	ENSG00000267064	UXT-AS1	0.061898	0.146508	0.027774	0.026431	0.038406	0.102442
ENST00000638795	ENSG00000284391	AL139398.1	0	0.059889	0.022131	0	0	0.030998
ENST00000628546	ENSG00000281091	AL606763.1	0	0.245607	0.081767	0.038694	0.102161	0.175199
ENST00000414769	ENSG00000223749	MIR503HG	0.135738	0.82542	0.375253	0.246069	0.224214	0.736712
ENST00000608616	ENSG00000241769	LINC00893	0.060415	0.115795	0.038545	0.039816	0	0.079328
ENST00000642139	ENSG00000284703	AL805961.2	0.001636	0.027637	0.00531	0.004342	0	0.012245
ENST00000419450	ENSG00000229051	LINC01788	0	0.003989	0	0	0	0.004697
ENST00000378779	ENSG00000205106	AC044839.1	0	0.038462	0.026333	0	0	0.030296
ENST00000553312	ENSG00000258535	AL079307.1	0.005269	0.007404	0.003771	0.001742	0.002959	0.003857
ENST00000554773	ENSG00000258556	LINC02322	0	0.047429	0	0	0	0.029086
ENST00000561511	ENSG00000260532	AL031598.1	0	0.009386	0	0	0	0.01109
ENST00000593903	ENSG00000268416	AC010329.1	0	0.000999	0	0	0	0.00118
ENST00000360083	ENSG00000196096	AC079610.1	0	0.012045	0	0	0	0.011593
ENST00000426467	ENSG00000226741	LINC02554	0	0.001647	0	0	0	0.001946
ENST00000510996	ENSG00000251010	AC097372.1	0.011985	0.034917	0.011577	0	0	0.015591
ENST00000512952	ENSG00000248393	AC026782.1	0	0.018531	0	0	0	0.02153
ENST00000455981	ENSG00000224307	AL161785.1	0	0.070503	0	0	0	0.033669
ENST00000566954	ENSG00000260996	BX255925.1	0	0.004488	0	0	0	0.002616
TCONS_00022349	ENSG00000048707	VPS13D	0.064262	0.068544	0.044047	0.025994	0.032182	0.067454
TCONS_00006148	XLOC_002650	XLOC_002650	0.027397	0.109997	0	0	0	0.040323
TCONS_00006149	XLOC_002650	XLOC_002650	0.116213	0.21908	0.131324	0.035368	0.114398	0.148131
TCONS_00007193	ENSG00000186564	FOXD2	0.037968	0.115215	0	0	0	0.032161
TCONS_00009129	XLOC_003708	XLOC_003708	0	0.05435	0	0	0.019645	0.036411
TCONS_00029439	XLOC_011880	XLOC_011880	0.093635	0.11755	0.067107	0.010436	0.022292	0.143119
TCONS_00012312	ENSG00000116128	BCL9	0.043843	0.227153	0	0	0.080808	0.184036
TCONS_00012760	XLOC_005198	XLOC_005198	0	0.065143	0.006316	0.012198	0.019298	0.041176
TCONS_00016472	XLOC_006674	XLOC_006674	0	0.026132	0	0	0	0.024701
TCONS_00035539	XLOC_014295	XLOC_014295	0.013313	0.089066	0.063942	0.032029	0.04012	0.075175
TCONS_00035711	ENSG00000116857	TMEM9	0.115366	0.23425	0.166605	0.10089	0.094596	0.144442
TCONS_00035899	ENSG00000133067	LGR6	0	0.016731	0.005174	0	0.006069	0.013223
TCONS_00017451	ENSG00000276600	RAB7B	0	0.032875	0	0	0	0.019738
TCONS_00018280	ENSG00000162814	SPATA17	0	0.067787	0	0	0	0.049863
TCONS_00018358	XLOC_007460	XLOC_007460	0.139838	0.173968	0.111954	0.085428	0.090556	0.143038
TCONS_00038207	XLOC_015579	XLOC_015579	0	0.049923	0.026205	0	0	0.031721
TCONS_00038279	XLOC_015621	XLOC_015621	0.044949	0.070408	0.032821	0.01814	0.017777	0.075403
TCONS_00019937	XLOC_008165	XLOC_008165	0.134038	0.23963	0.080236	0.040589	0.078466	0.13649
TCONS_00038629	XLOC_015812	XLOC_015812	0.009957	0.06269	0	0.008708	0.008745	0.02076
TCONS_00042037	ENSG00000198964	SGMS1	0.003136	0.023785	0.017289	0	0.010093	0.024944
TCONS_00042190	XLOC_017488	XLOC_017488	0.047251	0.093399	0.048701	0	0	0.121235
TCONS_00053233	XLOC_022536	XLOC_022536	0	0.041961	0.020524	0	0	0.048755
TCONS_00045530	XLOC_018934	XLOC_018934	0.002767	0.035112	0	0	0	0.024546
TCONS_00046135	ENSG00000107518	ATRNL1	0	0.086162	0	0	0	0.069218
TCONS_00057415	ENSG00000169519	METTL15	0.016707	0.03841	0	0.003316	0	0.018252
TCONS_00072562	ENSG00000174547	MRPL11	0.016881	0.109987	0	0.012429	0.019171	0.045816
TCONS_00074027	XLOC_030065	XLOC_030065	0	0.028693	0	0	0.01236	0.016652
TCONS_00064214	ENSG00000110723	EXPH5	0	0.05984	0	0	0.013235	0.057611
TCONS_00064210	ENSG00000178202	KDELC2	0.144478	0.15908	0.098974	0.054466	0.024389	0.125492
TCONS_00091036	ENSG00000134532	SOX5	0	0.014222	0	0	0	0.011644
TCONS_00091042	ENSG00000134532	SOX5	0.018853	0.048378	0.027137	0	0.003846	0.048445
TCONS_00080472	ENSG00000123106	CCDC91	0.010444	0.049495	0.036881	0	0	0.046145
TCONS_00094735	ENSG00000177990	DPY19L2	0.184836	0.342954	0.171359	0.120967	0.150354	0.220785
TCONS_00104201	XLOC_042099	XLOC_042099	0	0.027346	0	0	0	0.025599
TCONS_00104234	XLOC_042111	XLOC_042111	0.017166	0.077981	0.019969	0	0	0.039981
TCONS_00104365	ENSG00000132932	ATP8A2	0.038156	0.056331	0.027803	0.022702	0.012825	0.029317
TCONS_00104398	XLOC_042208	XLOC_042208	0	0.036438	0.016153	0	0	0.044277
TCONS_00101084	ENSG00000102780	DGKH	0.02979	0.192665	0	0.009787	0	0.1425
TCONS_00105497	ENSG00000120658	ENOX1	0	0.086376	0.042666	0.021876	0	0.111488
TCONS_00105500	ENSG00000120658	ENOX1	0.065696	0.144281	0.063097	0.046783	0.034609	0.059169
TCONS_00103184	ENSG00000198542	ITGBL1	0	0.031471	0.001236	0	0	0.018368
TCONS_00107659	XLOC_043973	XLOC_043973	0	0.041091	0.030849	0	0	0.069029
TCONS_00107941	XLOC_044149	XLOC_044149	0	0.071574	0	0	0	0.063425
TCONS_00112711	ENSG00000021645	NRXN3	0.033921	0.07235	0.04286	0.022909	0.00792	0.063125
TCONS_00112839	XLOC_046076	XLOC_046076	0.050557	0.154447	0.074864	0.048688	0.025371	0.105825
TCONS_00114748	ENSG00000170779	CDCA4	0.000765	0.068448	0.044106	0	0.039189	0.0602
TCONS_00128916	XLOC_052330	XLOC_052330	0.074343	0.084494	0.054738	0.018887	0.013177	0.055683
TCONS_00129354	ENSG00000166068	SPRED1	0.019436	0.167362	0.071808	0.054825	0.069116	0.127784
TCONS_00136622	ENSG00000122390	NAA60	0.12903	0.421775	0.23379	0.150044	0.194864	0.279644
TCONS_00137000	ENSG00000183044	ABAT	0.054908	0.091282	0.047349	0	0.045365	0.103696
TCONS_00137948	ENSG00000174628	IQCK	0.016105	0.032945	0.007416	0.01082	0.001527	0.024617
TCONS_00150850	ENSG00000140836	ZFHX3	0.018076	0.088767	0	0.012742	0.003211	0.076397
TCONS_00151858	XLOC_059480	XLOC_059480	0	0.177144	0	0	0	0.07851
TCONS_00153064	ENSG00000091622	PITPNM3	0.030161	0.074195	0.041765	0.006235	0.000425	0.045746
TCONS_00178473	XLOC_068313	XLOC_068313	0.086326	0.122938	0.058006	0.026791	0.016451	0.150243
TCONS_00175837	ENSG00000134769	DTNA	0.010526	0.042581	0.022487	0.009112	0.014722	0.033341
TCONS_00176802	ENSG00000041353	RAB27B	0	0.086	0	0	0	0.059765
TCONS_00181769	ENSG00000197971	MBP	0.029665	0.070014	0.048809	0.019919	0.019987	0.036468
TCONS_00187411	XLOC_071697	XLOC_071697	0.012425	0.081996	0.012375	0.016287	0	0.047023
TCONS_00189190	ENSG00000243130	PSG11	0.062108	0.146242	0.036013	0	0	0.074334
TCONS_00200618	ENSG00000130202	NECTIN2	0.249614	0.764987	0.267647	0.115728	0	0.582547
TCONS_00190286	XLOC_072467	XLOC_072467	0.055862	0.334559	0.051023	0	0.075783	0.111168
TCONS_00190297	XLOC_072467	XLOC_072467	0.006206	0.207145	0	0.014327	0.012998	0.154887
TCONS_00201960	XLOC_075679	XLOC_075679	0.156169	2.60539	0.758512	0.702991	0.671816	0.91697
TCONS_00204139	ENSG00000151692	RNF144A	0.05251	0.078661	0.040563	0.029061	0	0.064376
TCONS_00204660	ENSG00000170745	KCNS3	0	0.099599	0	0	0	0.0656
TCONS_00206211	ENSG00000138050	THUMPD2	0	0.107726	0.068855	0	0	0.093294
TCONS_00206273	XLOC_077233	XLOC_077233	0.117897	0.13381	0.084052	0.039253	0.041141	0.093997
TCONS_00225043	ENSG00000172086	KRCC1	0.070687	0.192571	0.096665	0.106177	0.100044	0.14208
TCONS_00226337	XLOC_085591	XLOC_085591	0.108847	0.320639	0	0	0.0782	0.201107
TCONS_00211972	XLOC_079758	XLOC_079758	0	0.054647	0	0	0.008001	0.021982
TCONS_00212925	ENSG00000204406	MBD5	0.03561	0.102687	0	0.006249	0	0.02927
TCONS_00229358	ENSG00000182263	FIGN	0.02948	0.11951	0.034518	0.021258	0.015348	0.101951
TCONS_00213625	ENSG00000178662	CSRNP3	0.138774	0.189481	0.066434	0.036666	0.086209	0.127557
TCONS_00218343	ENSG00000077044	DGKD	0.001009	0.3024	0.04118	0.022326	0.007186	0.129778
TCONS_00240340	XLOC_091721	XLOC_091721	0	0.025921	0	0.006733	0	0.015313
TCONS_00235978	XLOC_089970	XLOC_089970	0	0.015825	0	0	0	0.017019
TCONS_00236422	XLOC_090147	XLOC_090147	0	0.102826	0.043534	0.000533	0	0.064395
TCONS_00237785	XLOC_090585	XLOC_090585	0.003871	0.078258	0	0	0	0.066352
TCONS_00243389	ENSG00000087589	CASS4	0.075487	0.121186	0.024779	0.043092	0.023819	0.094414
TCONS_00244798	XLOC_093793	XLOC_093793	0.015756	0.080902	0.029737	0.032267	0.0345	0.055845
TCONS_00245114	XLOC_093983	XLOC_093983	0	0.238643	0.112592	0.053796	0.030401	0.159423
TCONS_00246146	XLOC_094403	XLOC_094403	0.010154	0.029451	0.013765	0	0.006739	0.025337
TCONS_00246293	ENSG00000160194	NDUFV3	0.210458	0.47416	0.360318	0.21797	0.182312	0.366941
TCONS_00257666	XLOC_098879	XLOC_098879	0	0.022134	0.002103	0	0.008423	0.011533
TCONS_00259603	XLOC_099491	XLOC_099491	0.009449	0.08586	0.012167	0.005378	0	0.036592
TCONS_00271900	XLOC_104384	XLOC_104384	0.024552	0.098662	0.031269	0.016458	0.029495	0.03675
TCONS_00271902	XLOC_104386	XLOC_104386	0.033428	0.093025	0	0	0	0.028519
TCONS_00259670	XLOC_099519	XLOC_099519	0	0.051545	0.026293	0.010387	0	0.044141
TCONS_00277187	XLOC_106523	XLOC_106523	0	0.014782	0	0	0	0.017524
TCONS_00277610	ENSG00000091986	CCDC80	0.058752	0.17871	0.054592	0.060319	0.06351	0.151752
TCONS_00269576	XLOC_103538	XLOC_103538	0	0.037944	0	0	0	0.02384
TCONS_00270010	ENSG00000145012	LPP	0.030477	0.195642	0.006032	0.000977	0	0.153668
TCONS_00282605	XLOC_108789	XLOC_108789	0	0.123626	0.063077	0	0.054872	0.071978
TCONS_00282883	ENSG00000163959	SLC51A	0	0.098744	0	0	0	0.050073
TCONS_00284792	ENSG00000007062	PROM1	0	0.037907	0	0	0	0.022394
TCONS_00285000	XLOC_109684	XLOC_109684	0	0.01982	0	0	0	0.014217
TCONS_00295368	ENSG00000156140	ADAMTS3	0.105542	0.284711	0.045683	0.065665	0.072967	0.098669
TCONS_00287417	ENSG00000145293	ENOPH1	0	0.016791	0	0	0	0.00816
TCONS_00289668	XLOC_111880	XLOC_111880	0.053215	0.132085	0	0.040136	0.03761	0.072335
TCONS_00290132	ENSG00000189099	PRSS48	0	0.083406	0	0	0	0.0738
TCONS_00299901	ENSG00000164122	ASB5	0	0.051645	0	0.014424	0	0.040584
TCONS_00314497	ENSG00000113448	PDE4D	0.035614	0.267643	0.008326	0.026533	0.001618	0.097756
TCONS_00303300	XLOC_118570	XLOC_118570	0	0.124516	0.068351	0.032475	0.05694	0.095498
TCONS_00303659	ENSG00000069020	MAST4	0	0.010963	0.008834	0.002257	0	0.007744
TCONS_00315446	ENSG00000113163	COL4A3BP	0	0.0976	0.007856	0.003132	0.012066	0.072092
TCONS_00307204	XLOC_120416	XLOC_120416	0	0.009653	0	0	0	0.009153
TCONS_00307838	ENSG00000120709	FAM53C	0.051982	0.078313	0.027049	0	0.001951	0.046443
TCONS_00318978	XLOC_125905	XLOC_125905	0.013873	0.029022	0.021765	0	0	0.030735
TCONS_00310337	XLOC_121604	XLOC_121604	0	0.023329	0.015812	0	0	0.035481
TCONS_00324420	ENSG00000196812	ZSCAN16	0.019776	0.04716	0	0	0.001704	0.024373
TCONS_00331192	ENSG00000171408	PDE7B	0.020592	0.05449	0	0	0.000504	0.02658
TCONS_00331188	ENSG00000171408	PDE7B	0.138293	0.239409	0.089925	0.065896	0.079405	0.163963
TCONS_00341991	XLOC_136870	XLOC_136870	0	0.092535	0	0.025033	0.029202	0.031875
TCONS_00331441	XLOC_131787	XLOC_131787	0	0.038543	0	0	0	0.040582
TCONS_00342304	XLOC_136999	XLOC_136999	0	0.008614	0	2.8e-05	0.000217	0.005593
TCONS_00344892	ENSG00000048052	HDAC9	0.108712	0.206936	0.064814	0.032726	0.027479	0.092649
TCONS_00346680	XLOC_138845	XLOC_138845	0.033611	0.076396	0.044272	0.025401	0.030233	0.046662
TCONS_00356847	ENSG00000158683	PKD1L1	0	0.069756	0	0	0	0.082254
TCONS_00347259	ENSG00000196247	ZNF107	0	0.026141	0	0.003522	0	0.026957
TCONS_00350326	ENSG00000173678	SPDYE2B	0.208901	0.278147	0.137931	0.06541	0.075144	0.243032
TCONS_00360902	ENSG00000184903	IMMP2L	0.00436	0.019935	0	0.004289	0	0.008128
TCONS_00361306	XLOC_144758	XLOC_144758	0	0.022218	0	0	0	0.015021
TCONS_00372974	ENSG00000168487	BMP1	0	0.024156	0	0	0	0.027082
TCONS_00365088	ENSG00000284956	AC107959.5	0	0.058405	0	0	0	0.050207
TCONS_00365987	ENSG00000156735	BAG4	0	0.203881	0.015446	0	0.070279	0.06973
TCONS_00366576	ENSG00000164808	SPIDR	0.134778	0.205939	0.125046	0.106919	0.096805	0.154538
TCONS_00366932	ENSG00000147509	RGS20	0.737717	1.06817	0.534364	0.384284	0.434201	0.964752
TCONS_00367536	XLOC_147429	XLOC_147429	0.221915	0.397689	0.227356	0.187045	0.176515	0.263269
TCONS_00375722	ENSG00000178860	MSC	0.085731	0.124321	0.076415	0.026572	0.061371	0.111822
TCONS_00369508	ENSG00000176406	RIMS2	0.009903	0.026108	0	0.008762	0	0.01796
TCONS_00394030	XLOC_159880	XLOC_159880	0	0.00682	0	0	0	0.008058
TCONS_00394536	ENSG00000198121	LPAR1	0.105363	0.41812	0.077955	0.092405	0.08019	0.16461
TCONS_00395956	XLOC_160805	XLOC_160805	0.029825	0.04121	0	0	0.0164	0.032127
TCONS_00395969	XLOC_160818	XLOC_160818	0.103424	0.453748	0.335953	0.268039	0.217428	0.388583
TCONS_00388097	XLOC_156987	XLOC_156987	0	0.04101	0	0	0	0.031696
TCONS_00405218	XLOC_165197	XLOC_165197	0.009026	0.028466	0	0	0	0.022339
TCONS_00406133	XLOC_165720	XLOC_165720	0	0.027504	0	0	0	0.028674
TCONS_00399585	ENSG00000197779	ZNF81	0.551326	1.0117	0.644456	0.432309	0	0.958745
TCONS_00408300	ENSG00000165259	HDX	0	0.106778	0.060233	0	0	0.102741
TCONS_00402425	ENSG00000077264	PAK3	0.037986	0.086544	0.005528	0.013216	0.009197	0.043487
TCONS_00000082	XLOC_000059	XLOC_000059	0	0.050704	0	0	0	0.05854
TCONS_00000121	XLOC_000083	XLOC_000083	0.020776	0.089236	0.008825	0.027573	0.031502	0.055886
TCONS_00000222	XLOC_000146	XLOC_000146	0.166945	0.518179	0.056465	0.071279	0.028438	0.279421
TCONS_00001071	XLOC_000789	XLOC_000789	0.094187	0.21427	0.121151	0.101676	0.040989	0.189874
TCONS_00073107	XLOC_029743	XLOC_029743	0	0.00402	0.002655	0	0	0.004444
TCONS_00185786	XLOC_071092	XLOC_071092	0.004741	0.007509	0	0	0	0.005915
TCONS_00240067	XLOC_091580	XLOC_091580	0	0.039507	0	0	0	0.036856
TCONS_00247585	XLOC_094964	XLOC_094964	0	0.046346	0.015972	0.019547	0	0.045939
TCONS_00248879	XLOC_095600	XLOC_095600	0	0.024021	0	0	0	0.014275
TCONS_00263886	XLOC_100970	XLOC_100970	0.025458	0.065371	0	0	0	0.056326
TCONS_00338875	XLOC_135312	XLOC_135312	0.031696	0.056413	0.023252	0.015508	0	0.040126
TCONS_00379400	XLOC_153042	XLOC_153042	0.043735	0.111435	0.038021	0	0.023241	0.087776
TCONS_00380737	XLOC_153444	XLOC_153444	0	0.033018	0	0	0	0.019246
TCONS_00385860	XLOC_156186	XLOC_156186	0	0.034434	0.012046	0	0	0.017225
TCONS_00401355	XLOC_163301	XLOC_163301	0.012842	0.042395	0.026347	0	0	0.067348
ENST00000415386	ENSG00000233421	LINC01783	0.129311	0.438066	0.240438	0.002781	0	0
ENST00000444923	ENSG00000226664	AL020998.1	0.051726	0.273257	0.222894	0.042902	0	0.115233
ENST00000450713	ENSG00000238287	AL603839.3	0	0.023976	0.019727	0	0	0
ENST00000640236	ENSG00000283973	AC099795.1	0	3.7e-05	3e-05	0	0	0
ENST00000606898	ENSG00000272094	AC091614.1	0	0.04884	0.037693	0	0	0
ENST00000526411	ENSG00000254942	AL355310.3	0	0.009756	0.007915	0	0	0
ENST00000565955	ENSG00000261055	AL450468.2	0.004143	0.021994	0.011309	0	0	0
ENST00000441071	ENSG00000235527	HIPK1-AS1	0.009388	0.018549	0.012076	0	0	0
ENST00000628622	ENSG00000280587	LINC01348	0.012006	0.030245	0.017059	0.004366	0	0.002614
ENST00000454470	ENSG00000233117	LINC00702	0.74362	1.24222	0.830158	0.178065	0.127039	0.206837
ENST00000354527	ENSG00000196566	AL138767.1	0.052405	0.354452	0.061787	0.050737	0	0.102662
ENST00000650092	ENSG00000246273	SBF2-AS1	0	0.053753	0.039204	0	0	0.023918
ENST00000568280	ENSG00000260196	AC124798.1	0.01208	0.03479	0.013695	0.003616	0.003206	0.01422
ENST00000527092	ENSG00000255517	AP002748.3	0.074363	0.147555	0.062239	0.012723	0.02058	0
ENST00000530126	ENSG00000254699	AP003097.2	0.000504	0.037933	0.029296	0	0	0.003398
ENST00000533434	ENSG00000254842	LINC02551	0	0.067934	0.033748	0	0	0
ENST00000538062	ENSG00000256967	AC018653.3	0	0.049206	0.02992	0	0	0.005528
ENST00000649354	ENSG00000285517	AC010198.2	0	0.049544	0.031675	0	0	0
ENST00000551503	ENSG00000257261	AC008014.1	0.117397	0.257271	0.169138	0.036401	0.012658	0.044216
ENST00000551210	ENSG00000251138	AC090502.1	0.07138	0.1228	0.032928	0.01406	0.031563	0.029824
ENST00000552778	ENSG00000258302	AC025034.1	0	0.023877	0.011529	0	0	0
ENST00000549251	ENSG00000257642	AC011313.1	0.025835	0.073938	0.018824	0	0	0
ENST00000542980	ENSG00000256151	ADGRD1-AS1	0	0.004968	0.00421	0	0	0
ENST00000529902	ENSG00000214900	LINC01588	0.00339	0.015325	0.007302	0.001068	0	0.001156
ENST00000528300	ENSG00000214900	LINC01588	0	0.007974	0.006074	0	0	0.001232
ENST00000555313	ENSG00000258976	AC013451.2	0.076903	0.222993	0.018102	0.0137	0.007234	0.011897
ENST00000618460	ENSG00000273565	AL691403.2	0.022597	0.090604	0.004921	0.004268	0.014973	0
ENST00000619017	ENSG00000273729	AC007686.3	0.003708	0.416566	0.189858	0.081082	0.010607	0.197069
ENST00000565938	ENSG00000260123	AC013565.1	0.021364	0.071258	0.020716	0	0	0.024818
ENST00000637770	ENSG00000283689	AC018553.2	0.013406	0.13232	0.00278	0.010542	0.013373	0.027975
ENST00000445508	ENSG00000227274	AC005358.1	0	0.014497	0.007476	0	0	0
ENST00000562897	ENSG00000260328	AC104024.2	0.076694	0.213245	0.124506	0.04076	0.020461	0.033521
ENST00000572349	ENSG00000261886	AC005670.1	0.001896	0.014764	0.011787	0	0	0
ENST00000579643	ENSG00000277198	RN7SL270P	0.003084	0.017371	0.005676	0	0	0
ENST00000572187	ENSG00000262298	AC004584.1	0.001148	0.044125	0.020378	0.006603	0	0.00852
ENST00000581471	ENSG00000263753	LINC00667	0.000305	0.769784	0.421699	0.001668	0.039651	0.010452
ENST00000588134	ENSG00000267325	LINC01415	0.132635	0.201384	0.162887	0	0	0.10411
ENST00000578633	ENSG00000266304	LIVAR	0	0.033872	0.018188	0	0	0
ENST00000597028	ENSG00000269053	AC010319.3	0.173849	0.84881	0.358774	0.24727	0.17846	0.265505
ENST00000594805	ENSG00000268650	AC005759.1	0.007412	0.019167	0.011033	0.001594	0.001416	0.001905
ENST00000586248	ENSG00000261824	LINC00662	0	0.153455	0.090455	0	0	0
ENST00000603028	ENSG00000270820	AC016727.1	0	0.064894	0.036025	0	0	0
ENST00000432211	ENSG00000231851	AC104655.1	0.038725	0.083238	0.01089	0.012159	0	0.017855
ENST00000643013	ENSG00000172965	MIR4435-2HG	0.256981	0.803282	0.363254	0	0.093659	0.010153
ENST00000423031	ENSG00000226674	TEX41	0	0.008304	0.006019	0	0	0
ENST00000427108	ENSG00000237877	LINC01473	0	0.014374	0.008319	0	0	0
ENST00000447972	ENSG00000230408	AC007163.1	0.027333	0.107627	0.025555	0.00965	0.016698	0.000412
ENST00000417485	ENSG00000237525	AC012668.3	0.001232	0.019746	0.014988	0	0.004101	0.003353
ENST00000431827	ENSG00000234638	AC053503.4	0	0.017595	0.013313	0	0	0
ENST00000619222	ENSG00000215386	MIR99AHG	0	0.004918	0.003866	0	0	0
ENST00000330551	ENSG00000183250	LINC01547	0.014719	0.098285	0.0535	0	0.008644	0.003616
ENST00000426483	ENSG00000225335	AC016027.1	0	0.062601	0.051622	0	0	0
ENST00000481221	ENSG00000206573	THUMPD3-AS1	0.018591	0.119245	0.009127	0	0.021199	0.028548
ENST00000412171	ENSG00000224424	PRKAR2A-AS1	0.001418	0.018774	0.011073	0.00249	0.001265	0.006407
ENST00000472238	ENSG00000242317	AC121764.1	0.036561	0.098319	0.068412	0.008483	0	0.01575
ENST00000473756	ENSG00000240476	LINC00973	0.100703	0.208927	0.046387	0.049083	0.028868	0.037312
ENST00000382007	ENSG00000205830	AC024132.1	0	0.009949	0.004908	0	0	0
ENST00000489096	ENSG00000240005	STIM2-AS1	0.062538	0.283023	0.121989	0.012741	0.000127	0.028552
ENST00000605849	ENSG00000271474	AC106881.1	0.002367	0.007498	0.005134	0	0	0
ENST00000505537	ENSG00000177822	TENM3-AS1	0.154737	0.663935	0.341057	0.124313	0.163343	0.121343
ENST00000510469	ENSG00000251257	AC010457.1	0.33612	0.927208	0.137106	0	0.155563	0
ENST00000606157	ENSG00000272123	AC008966.2	0.041088	0.245588	0.050295	0.061668	0.011043	0.075088
ENST00000508000	ENSG00000249042	AC008771.1	0.010145	0.082164	0.068505	0.011234	0.012005	0
ENST00000649976	ENSG00000248323	LUCAT1	0	0.048503	0.015284	0	0	0.011058
ENST00000502437	ENSG00000249746	AC099509.1	0.011814	0.031734	0.013106	0	0	0
ENST00000521133	ENSG00000245146	MALINC1	0	0.018398	0.012341	0	0	0
ENST00000456103	ENSG00000235570	LINC00533	0	0.037018	0.030324	0	0	0.019596
ENST00000420759	ENSG00000225096	AL445250.1	0.002384	0.164814	0.014803	0.018872	0.0326	0.00446
ENST00000431422	ENSG00000236700	LINC01010	0.00208	0.016086	0.01239	0	0	0
ENST00000583191	ENSG00000264520	AC005154.4	0	0.023985	0.015528	0	0	0
ENST00000446309	ENSG00000224046	AC005076.1	0.016071	0.077525	0.02096	0.023981	0.022145	0.020903
ENST00000453601	ENSG00000236404	VLDLR-AS1	1e-06	0.086229	0.062043	0.008184	4.5e-05	0
ENST00000580576	ENSG00000240498	CDKN2B-AS1	0.014039	0.080935	0.00125	0.004607	0.001712	0.015745
ENST00000644854	ENSG00000285018	AC245140.3	0.000442	0.002511	0.001194	0.000101	0.000268	0.00016
ENST00000652216	ENSG00000286009	AC244213.1	0.016486	0.062027	0	0	0.011504	0.007545
ENST00000561362	ENSG00000259590	LINC02244	0	0.037265	0.026279	0	0	0
TCONS_00022213	ENSG00000171824	EXOSC10	0.231105	1.49673	0.372731	0.188206	0.198236	0.156699
TCONS_00023856	ENSG00000158008	EXTL1	0	0.022815	0.015852	0	0	0
TCONS_00026046	XLOC_010438	XLOC_010438	0	0.019849	0.016515	0	0	0
TCONS_00029069	XLOC_011704	XLOC_011704	0.004322	0.127341	0.045077	0.020804	0.017249	0.027018
TCONS_00030284	ENSG00000175984	DENND2C	0.026401	0.156861	0	0.028582	5e-05	0.027949
TCONS_00031925	ENSG00000197622	CDC42SE1	0	0.161054	0.097704	0	0	0
TCONS_00014347	ENSG00000162734	PEA15	0	0.874824	0.734542	0	0	0
TCONS_00036343	ENSG00000196550	FAM72A	0.01827	0.198948	0.128041	0.058009	0.032437	0.051409
TCONS_00019682	ENSG00000183780	SLC35F3	0.000201	0.143106	0.099899	0.000466	0	0.000782
TCONS_00020232	ENSG00000182901	RGS7	0.020155	0.202822	0.141048	0	0.053963	0.077982
TCONS_00042528	ENSG00000183230	CTNNA3	0.036664	0.108617	0.04606	0	0.018277	0.023543
TCONS_00044779	XLOC_018680	XLOC_018680	0.010764	0.026354	0.008901	0	0	0.010379
TCONS_00046011	ENSG00000165806	CASP7	0	0.133712	0.07787	0.00221	0.002767	0.04986
TCONS_00057184	ENSG00000187398	LUZP2	0.004914	0.087053	0.074064	0	0	0
TCONS_00076480	ENSG00000180425	C11orf71	0	0.427175	0.196418	0.004816	0	0.036402
TCONS_00081312	ENSG00000179715	PCED1B	0.002122	0.302904	0.153798	0.055925	0.007311	0.059445
TCONS_00081717	ENSG00000110844	PRPF40B	0	0.09753	0.075471	0	0	0
TCONS_00094286	ENSG00000166886	NAB2	0.523479	3.64974	1.89974	1.09364	1.36677	1.3613
TCONS_00096024	ENSG00000049130	KITLG	0.040773	0.2403	0.142661	0	0.034119	0.014688
TCONS_00086398	ENSG00000084112	SSH1	0.027936	0.147378	0.04696	0.010446	0.012985	0.026702
TCONS_00097599	ENSG00000111252	SH2B3	0.036001	0.223789	0.084888	0	0.02555	0.030299
TCONS_00104912	XLOC_042478	XLOC_042478	0.03573	0.089361	0.008555	0	0	0.01636
TCONS_00101231	XLOC_040651	XLOC_040651	0	0.047365	0.024133	0	0	0
TCONS_00102050	XLOC_041012	XLOC_041012	0	0.01968	0.011276	0	0.000307	0
TCONS_00107649	XLOC_043964	XLOC_043964	0.031517	0.066952	0.030383	0.010434	0.020987	0.019662
TCONS_00118620	XLOC_048276	XLOC_048276	0.030265	0.149958	0.034249	0	0.021029	0.019701
TCONS_00112323	XLOC_045878	XLOC_045878	0.009104	0.058881	0.01973	0.006021	0	0.014198
TCONS_00128918	XLOC_052330	XLOC_052330	0.023266	0.093585	0.028707	0	0.020656	0.009676
TCONS_00122668	ENSG00000248905	FMN1	0	0.087076	0.041518	0.018664	0.031553	0.029561
TCONS_00123916	XLOC_050433	XLOC_050433	0.022086	0.102641	0.051902	0	0	0.022827
TCONS_00144688	ENSG00000183971	NPW	0.03203	0.067646	0.034736	0	0	0.019649
TCONS_00152078	XLOC_059552	XLOC_059552	0	0.177994	0.049179	0	0.021108	0.021165
TCONS_00153594	ENSG00000179148	ALOXE3	0.014843	0.101191	0.067519	0	0.034342	0.050601
TCONS_00164711	ENSG00000187824	TMEM220	0.020955	0.174547	0.095703	0.013457	0	0
TCONS_00156998	ENSG00000167920	TMEM99	0.03654	0.090292	0.004205	0.004872	0	0.008505
TCONS_00171991	ENSG00000166685	COG1	0	0.045885	0.030802	0	0.005908	0.006229
TCONS_00181765	ENSG00000197971	MBP	0.016552	0.052988	0.011663	0	0.008469	0
TCONS_00185822	ENSG00000099308	MAST3	0.124552	0.229696	0.0425	0	0.040802	0.050715
TCONS_00210107	XLOC_078922	XLOC_078922	0	0.099293	0.042046	0	0	0.013807
TCONS_00225931	XLOC_085423	XLOC_085423	0.016274	0.110428	0.019526	0.018373	0	0.027625
TCONS_00225989	XLOC_085441	XLOC_085441	0	0.052825	0.029091	0	0	0
TCONS_00228455	XLOC_086751	XLOC_086751	0.033958	0.093622	0.023268	0.01522	0	0.020923
TCONS_00214477	ENSG00000079156	OSBPL6	0.013305	0.03321	0.023571	0	0	0.0078
TCONS_00216481	ENSG00000021826	CPS1	0.038566	0.201835	0.048564	0.009412	0	0
TCONS_00232445	ENSG00000115425	PECR	0.009621	0.303273	0.26096	0	0	0.005965
TCONS_00217533	XLOC_082122	XLOC_082122	0	0.082997	0.032115	0.025621	0.026233	0.021462
TCONS_00233787	XLOC_089011	XLOC_089011	0.00947	0.089839	0.041014	0.012569	0.012612	0.035251
TCONS_00233865	XLOC_089061	XLOC_089061	0	0.068042	0.043568	0	0	0
TCONS_00235197	ENSG00000149346	SLX4IP	0.029079	0.090103	0.006189	0.009987	0.015477	0.010713
TCONS_00241278	ENSG00000197183	NOL4L	0	0.644131	0.42592	0	0.164256	0.222214
TCONS_00243154	XLOC_092999	XLOC_092999	0.016955	0.080526	0.036557	0	0	0
TCONS_00238272	ENSG00000064787	BCAS1	0.008277	0.136213	0.100845	0.03841	0.016534	0.046296
TCONS_00238293	XLOC_090878	XLOC_090878	0	0.048178	0.038302	0	0	0
TCONS_00248478	ENSG00000159216	RUNX1	0.069489	0.390661	0.049211	0.03912	0.044989	0.087744
TCONS_00252929	ENSG00000100354	TNRC6B	0.024224	0.079622	0.023406	0	0	0.010758
TCONS_00273051	ENSG00000177842	ZNF620	0.038105	0.235577	0.065984	0	0	0.025834
TCONS_00263630	XLOC_100815	XLOC_100815	0.017055	0.089929	0.018496	0.011318	0	0.020348
TCONS_00279321	XLOC_107341	XLOC_107341	0.028135	0.075319	0.025777	0	0.007913	0.003806
TCONS_00280479	XLOC_107944	XLOC_107944	0	0.069441	0.021302	0	0	0.019548
TCONS_00268015	XLOC_102927	XLOC_102927	0.0069	0.051001	0.006316	0.008831	0	0.008609
TCONS_00268663	ENSG00000085276	MECOM	0.03912	0.071798	0.053538	0	0.007811	0.026718
TCONS_00293065	XLOC_113605	XLOC_113605	0.033311	0.092061	0.041431	0	0	0
TCONS_00288876	ENSG00000145390	USP53	0.023348	0.0564	0.021764	0	0	0
TCONS_00289045	ENSG00000138688	KIAA1109	0.034806	0.089486	0.036478	0	0	0
TCONS_00298020	XLOC_115823	XLOC_115823	0.017908	0.071451	0.043587	0	0	0
TCONS_00290736	ENSG00000145416	2022-03-01	0.013464	0.159643	0.028381	0.01303	0.041249	0.040272
TCONS_00290960	ENSG00000109572	CLCN3	0.003426	0.012995	0.005929	0	0.002281	0.004274
TCONS_00311975	ENSG00000112902	SEMA5A	0.140457	0.360985	0.056229	0.032248	0.023082	0.05236
TCONS_00312268	XLOC_122416	XLOC_122416	0.165477	0.656578	0.193865	0.064489	0.063421	0
TCONS_00314648	XLOC_123716	XLOC_123716	0	0.115998	0.068076	0	0.012212	0
TCONS_00307686	XLOC_120594	XLOC_120594	0.004189	0.097976	0.018774	0.011504	0.019353	0.030617
TCONS_00320531	XLOC_126523	XLOC_126523	0	0.099187	0.03239	0	0	0.036411
TCONS_00324178	XLOC_128197	XLOC_128197	0.083792	0.552217	0.296741	0.056059	0	0.174731
TCONS_00337500	XLOC_134526	XLOC_134526	0	0.043272	0.034616	0	0	0
TCONS_00337573	XLOC_134587	XLOC_134587	0	0.122785	0.064977	0	0	0
TCONS_00340294	XLOC_136063	XLOC_136063	0.011854	0.043787	0.025901	0	0	0
TCONS_00331221	ENSG00000197442	MAP3K5	0	0.16261	0.081757	0	0	0
TCONS_00342315	XLOC_136999	XLOC_136999	0	0.053436	0.04471	0	0	0.034788
TCONS_00343120	XLOC_137405	XLOC_137405	0.011129	0.070513	0.018104	0	0.014821	0.013886
TCONS_00344877	ENSG00000048052	HDAC9	0	0.094557	0.058739	0	0	0
TCONS_00346269	ENSG00000002746	HECW1	0.082557	0.256115	0.126436	0	0	0
TCONS_00346742	XLOC_138896	XLOC_138896	0	0.031682	0.025307	0	0	0
TCONS_00363481	XLOC_145688	XLOC_145688	0.016192	0.042889	0.02628	0	0	0
TCONS_00365084	ENSG00000284956	AC107959.5	0.011108	0.076301	0.036179	0	0	0
TCONS_00365061	ENSG00000134020	PEBP4	0	0.042393	0.023305	0	0	0
TCONS_00365561	XLOC_146485	XLOC_146485	0	0.017647	0.014954	0	0	0.010425
TCONS_00369147	XLOC_148251	XLOC_148251	0	0.077743	0.064519	0	0.009348	0.037825
TCONS_00370185	ENSG00000178764	ZHX2	0	0.128746	0.076591	0.026071	0	0.069371
TCONS_00393016	XLOC_159473	XLOC_159473	0.0949	0.249016	0.163167	0	0	0
TCONS_00402423	ENSG00000077264	PAK3	2e-05	0.000274	0.000184	3.5e-05	1.6e-05	3.4e-05
TCONS_00409645	XLOC_167505	XLOC_167505	0	0.088835	0.035615	0.011575	0	0
TCONS_00000280	XLOC_000190	XLOC_000190	0.035155	0.127642	0.00025	0.029369	0.023182	0.022718
TCONS_00001070	XLOC_000789	XLOC_000789	0	0.158814	0.076566	0	0	0
TCONS_00001040	XLOC_000772	XLOC_000772	0.037976	0.071699	0.056972	0	0	0
TCONS_00024073	XLOC_009720	XLOC_009720	0.014895	0.078644	0.032307	0	0	0
TCONS_00040428	XLOC_016651	XLOC_016651	0	0.081574	0.041329	0	0	0
TCONS_00064081	XLOC_026612	XLOC_026612	0	0.074752	0.055342	0	0	0
TCONS_00122771	XLOC_050073	XLOC_050073	0	0.01567	0.013622	0	0	0
TCONS_00273326	XLOC_105004	XLOC_105004	0.027292	0.217814	0	0.025593	0.027469	0.025735
TCONS_00334001	XLOC_133056	XLOC_133056	0	0.040667	0.02488	0.010222	0.015383	0.01922
TCONS_00369803	XLOC_148572	XLOC_148572	0.010548	0.094084	0.022573	0	0	0.026321

## Sheet: lncRNA_No UV_cluster 3
transcript_id	gene_id	gene_name	C_0	C_3	C_6	C_9	C_12	C_24
ENST00000429389	ENSG00000231630	AL592464.1	0	0	0.00664	0	0	0
ENST00000454613	ENSG00000186056	MATN1-AS1	0	0	0.043065	0	0	0
ENST00000443076	ENSG00000186056	MATN1-AS1	0	0	0.005521	0	0	0
ENST00000427524	ENSG00000236065	AL020995.1	0	0	0.005086	0	0	0
ENST00000437643	ENSG00000230615	AL139220.2	0	0	0.119353	0	0	0
ENST00000436033	ENSG00000233203	DHCR24-DT	0	0	0.004021	0	0	0
ENST00000433690	ENSG00000233203	DHCR24-DT	1.2e-05	0.004689	0.018454	0.000382	0.000583	0
ENST00000427292	ENSG00000232453	AC105277.1	0	0.000624	0.004763	0.000712	0	0
ENST00000423408	ENSG00000232453	AC105277.1	0	0	0.101764	0	0	0
ENST00000413628	ENSG00000232284	GNG12-AS1	0	0	0.005482	0	0	0
ENST00000426999	ENSG00000235079	ZRANB2-AS1	0	0	0.000469	0	0	0
ENST00000640362	ENSG00000284240	AC099062.1	0	0	0.006634	0	0	0
ENST00000645890	ENSG00000237505	PKN2-AS1	0.000621	0	0.012835	0.003611	0	0.002778
ENST00000429074	ENSG00000230735	AC093423.2	0	0	0.016882	0	0	0
ENST00000650406	ENSG00000285532	AC091614.2	0	0	0.002493	0	0	0
ENST00000602852	ENSG00000225206	MIR137HG	0.050592	0.007479	0.524458	0.067176	0.017608	0.012923
ENST00000608123	ENSG00000273406	AC245008.1	0	0	0.008976	0	0	0
ENST00000611275	ENSG00000233396	LINC01719	0	0	0.053203	0	0	0
ENST00000424435	ENSG00000228013	IL6R-AS1	0	0	0.019465	0	0	0
ENST00000441613	ENSG00000229780	UBE2Q1-AS1	0	0	0.005577	0	0	0
ENST00000447623	ENSG00000231064	AC234582.1	0	0	0.014897	0	0	0
ENST00000422665	ENSG00000231064	AC234582.1	0	0.015201	0.039742	0	0	0
ENST00000420498	ENSG00000224985	AL590714.1	0	0	0.010666	0	0	0
ENST00000455124	ENSG00000231424	AL445673.1	0.000189	0	0.076477	0.037931	0	0
ENST00000419458	ENSG00000224687	RASAL2-AS1	0.065771	0.017473	0.23972	0	0.004673	0.017038
ENST00000569292	ENSG00000261729	AL133383.1	0	0.006906	0.028136	0.007185	0	0
ENST00000452178	ENSG00000225811	AL354771.1	0	0	0.009079	0	0	0
ENST00000610948	ENSG00000153363	LINC00467	0	0	0.026817	0	0	0
ENST00000428673	ENSG00000235152	AL353052.1	0	0	0.019469	0	0	0
ENST00000651370	ENSG00000286263	AL391832.4	0	0	0.002367	0	0	0
ENST00000451766	ENSG00000238005	AL391832.2	0	0	0.065939	0	0	0
ENST00000649385	ENSG00000215808	LINC01139	0	0	0.001208	0	0	0
ENST00000437499	ENSG00000232085	AL606534.2	0	0	0.007636	0	0	0
ENST00000649029	ENSG00000238266	LINC00707	0	0.007092	0.029729	0	0	0
ENST00000445498	ENSG00000225778	PROSER2-AS1	0	0	0.002716	0	0	0
ENST00000608026	ENSG00000273153	AC067747.1	0	0	0.042641	0	0	0
ENST00000445235	ENSG00000229190	AC069542.1	0	0	0.008334	0	0	0
ENST00000424191	ENSG00000237036	ZEB1-AS1	0	0	0.103647	0	0	0
ENST00000471327	ENSG00000239731	RN7SL825P	0	0	0.020277	0	0	0
ENST00000450890	ENSG00000229656	ITGB1-DT	0	0	0.017908	0	0	0
ENST00000429214	ENSG00000236514	AL135791.1	0	0	0.050512	0	0	0
ENST00000418966	ENSG00000230565	ZNF32-AS2	0	0	0.022038	0	0	0
ENST00000436877	ENSG00000234504	AL353801.2	0	0	0.011855	0	0	0
ENST00000650407	ENSG00000285803	AL442003.1	0.001733	0	0.01065	0	0	0.002845
ENST00000648274	ENSG00000235356	AL592466.1	0	0	0.002816	0	0	0
ENST00000410439	ENSG00000222371	RN7SKP202	0	0	0.025894	0	0	0
ENST00000456353	ENSG00000224596	ZMIZ1-AS1	0.001425	0.00369	0.047631	0	0.005463	0
ENST00000421256	ENSG00000226676	BX248123.1	0	0.019018	0.04439	0	0	0
ENST00000622689	ENSG00000275024	AC005383.1	0	0	0.001174	0	0	0
ENST00000648967	ENSG00000285582	AC016042.1	0	0	0.000246	0	0	0
ENST00000525909	ENSG00000224023	EDRF1-DT	0	0	0.027033	0	0	0
ENST00000392630	ENSG00000180066	C10orf91	0	0	0.011572	0	0.00559	0
ENST00000533844	ENSG00000254815	AP006284.1	0	0	0.023665	0	0	0
ENST00000476130	ENSG00000254991	AC124276.1	0	0.002024	0.011121	0	0	0
ENST00000534477	ENSG00000251381	LINC00958	0	0	0.042824	0	0	0
ENST00000530450	ENSG00000246250	AC087521.2	0	0	0.00233	0	0	0
ENST00000528765	ENSG00000246250	AC087521.2	0	0	0.005333	0	0	0
ENST00000499066	ENSG00000246250	AC087521.2	0	0	0.003928	0	0	0
ENST00000528978	ENSG00000255299	AP003557.1	0	0	0.003438	0	0	0
ENST00000529036	ENSG00000255038	AP006287.2	0	0	0.058814	0	0.00021	0
ENST00000473849	ENSG00000239553	RN7SL12P	0	0	0.007661	0	0	0
ENST00000529069	ENSG00000251637	AP003716.1	0	0	0.007121	0	0	0
ENST00000527440	ENSG00000254885	AP001547.1	0	0	0.013069	0	0	0
ENST00000526091	ENSG00000255345	AP002957.1	0	0	0.004838	0	0	0
ENST00000527281	ENSG00000255502	AP003730.2	0	0.0025	0.01104	0	0.000452	0
ENST00000444200	ENSG00000235910	APOA1-AS	0	0	0.015178	0	0	0
ENST00000525992	ENSG00000255435	AP001267.3	0	0	0.026516	0	0.013598	0.001463
ENST00000498872	ENSG00000245869	AP004609.1	0	0	0.005191	0	0	0.002725
ENST00000577297	ENSG00000245248	USP2-AS1	0	0	0.011901	0	0.000965	0
ENST00000525706	ENSG00000254588	ETS1-AS1	0	0	0.003245	0	0	0
ENST00000543290	ENSG00000250132	AC004803.1	0	0	0.024611	0	0	0
ENST00000513082	ENSG00000249028	AC004672.1	0	0	0.004092	0	0	0
ENST00000542984	ENSG00000256837	CACNA1C-IT1	0	0	0.010975	0	0	0
ENST00000539784	ENSG00000256197	TSPAN9-IT1	0.002944	0	0.01138	0	0	0
ENST00000540566	ENSG00000226711	FAM66C	0.015997	0	0.098029	0	0	0
ENST00000535746	ENSG00000256101	AC092745.1	0	0	0.008151	0	0	0
ENST00000538304	ENSG00000226091	LINC00937	0.000846	0	0.022597	0	0	0.004558
ENST00000616957	ENSG00000274624	AC007671.1	0	0	0.020591	0	0	0
ENST00000536922	ENSG00000256377	AC009509.1	0	0	0.003772	0	0	0
ENST00000547804	ENSG00000285517	AC010198.2	0	0.030266	0.276264	0.016622	0	0.040664
ENST00000649555	ENSG00000285517	AC010198.2	0	0	0.050004	0	0	0
ENST00000547824	ENSG00000257225	AC079601.1	0	0	0.002815	0	0	0
ENST00000611243	ENSG00000257261	AC008014.1	0	0	0.061289	0	0	0
ENST00000548872	ENSG00000258057	BCDIN3D-AS1	0	0	0.0008	0	0	7e-05
ENST00000549438	ENSG00000258317	AC034102.6	0	0	0.013491	0	0.002141	0
ENST00000509615	ENSG00000249753	AC084357.2	0	0	0.028177	0	0	0.008341
ENST00000649287	ENSG00000255850	RXYLT1-AS1	0	0	0.009938	0	0	0
ENST00000545188	ENSG00000256915	AC090023.2	0	0	0.051697	0	0	0
ENST00000500695	ENSG00000247363	AC090061.1	0	0	0.002918	0	0	0
ENST00000547656	ENSG00000258168	AC025569.1	0	0	0.000212	0	0	0
ENST00000548687	ENSG00000258168	AC025569.1	0	0	0.004641	0	0	0
ENST00000550938	ENSG00000257467	PPFIA2-AS1	0	0	0.021633	0	0	0
ENST00000615716	ENSG00000277851	LINC02391	0	0	0.009722	0	0	0
ENST00000483714	ENSG00000264978	RN7SL630P	0	0.002708	0.077875	0.003052	0	0
ENST00000547346	ENSG00000257715	AC007298.1	0.00225	0	0.013026	0	0	0
ENST00000580352	ENSG00000266610	RN7SL176P	0	0	0.017371	0.00581	0	0.003889
ENST00000550175	ENSG00000257766	AC025265.3	0	0	0.018259	0	0	0
ENST00000541723	ENSG00000255650	FAM222A-AS1	0	0	0.009666	0	0	0
ENST00000553177	ENSG00000185847	LINC01405	0	0	0.022673	0	0	0
ENST00000551125	ENSG00000258323	AC073575.1	0	0	0.019623	0	0	0
ENST00000602352	ENSG00000269980	AC068768.1	0	0	0.011378	0	0	0
ENST00000539391	ENSG00000256596	AC026358.1	0	0.000564	0.001894	0	0	0
ENST00000614177	ENSG00000256597	LINC02393	0	0	0.004288	0	0	0
ENST00000539362	ENSG00000256085	AC130404.1	0	0	0.000424	0	0	0
ENST00000376617	ENSG00000256943	AC148477.3	0	0	0.009865	0	0	0
ENST00000575845	ENSG00000262198	AL157931.1	0	0	0.017278	0	0	0
ENST00000454681	ENSG00000230490	AL139383.1	0	0	0.01718	0	0	0
ENST00000452207	ENSG00000232986	AL139081.1	0	0	0.016132	0	0	0
ENST00000414480	ENSG00000230390	LINC01048	0	0	0.030769	0	0	0
ENST00000636192	ENSG00000215483	LINC00598	0	0	0.002809	0	0	0
ENST00000400431	ENSG00000215483	LINC00598	0	0	0.008561	0	0	0
ENST00000415082	ENSG00000235285	SMIM2-IT1	0	0	0.013611	0	0	0
ENST00000648492	ENSG00000231817	LINC01198	0	0	0.000846	0	0	0
ENST00000613982	ENSG00000273523	AL139082.1	0	0	0.000531	0	0	0
ENST00000606049	ENSG00000227354	RBM26-AS1	0	0	0.023944	0	0.005194	0
ENST00000644746	ENSG00000233532	LINC00460	0	0	0.030267	0.008217	0	0
ENST00000555580	ENSG00000259069	AL512310.9	0	0	0.007589	0.00064	0	0
ENST00000557615	ENSG00000258457	AL132780.2	0	0	0.007696	0	0.004008	0
ENST00000554665	ENSG00000258558	AL121852.1	0	0	0.009936	0	0	0
ENST00000652126	ENSG00000258526	AL049828.1	0	0	0.004134	0	0	0
ENST00000555801	ENSG00000258479	LINC00640	0	0	0.021799	0	0	0
ENST00000412224	ENSG00000186615	KTN1-AS1	0.000229	4.8e-05	0.000783	9e-06	4.8e-05	1.7e-05
ENST00000229465	ENSG00000232774	AL355916.1	0.000809	0.001812	0.186422	0	0.001323	0
ENST00000554433	ENSG00000258407	AL157955.1	0	0	0.026347	0	0.014791	0
ENST00000502101	ENSG00000247970	AL160313.1	0	0.007907	0.021028	0.000491	0	1.1e-05
ENST00000556973	ENSG00000258512	LINC00239	0	0.004427	0.045992	0	0	0
ENST00000556080	ENSG00000258620	AL135838.1	0	0	0.046301	0.021788	0	0
ENST00000619139	ENSG00000277467	RN7SL628P	0	0	0.025239	0	0	0
ENST00000561388	ENSG00000259617	AC020661.3	0	0	0.008545	0	0	0
ENST00000621880	ENSG00000274719	AC012653.2	0	0	0.002781	0	0	0
ENST00000502156	ENSG00000245719	AC009292.1	0	0	0.004303	0	0	0
ENST00000561232	ENSG00000259673	IQCH-AS1	0	0	0.006759	0	0	0
ENST00000559495	ENSG00000259265	AC027088.3	0	0	0.009146	0.002039	0	0
ENST00000561834	ENSG00000260037	AC104938.1	0	0	0.008111	0	0	0
ENST00000645479	ENSG00000245750	DRAIC	0	0	0.005568	0	0	0.001232
ENST00000563464	ENSG00000260672	AC100827.4	0.003228	0	0.028005	0.004227	0.004112	0.004027
ENST00000568087	ENSG00000261801	LOXL1-AS1	0.003974	0	0.124327	0	7e-06	0
ENST00000568496	ENSG00000261821	AC090826.1	0	0	0.003455	0	0	0
ENST00000566036	ENSG00000260235	AC105020.3	0	0	0.008535	0	0	0
ENST00000558192	ENSG00000272418	AC090607.4	0	0	0.019822	0	0	0
ENST00000548231	ENSG00000258010	AC016705.1	0	0	0.004519	0	0	0
ENST00000559781	ENSG00000259343	TMC3-AS1	0.00359	0	0.149731	0.004748	0.009561	0.004479
ENST00000568634	ENSG00000259986	AC103876.1	0	0	0.006814	0	0	0
ENST00000555772	ENSG00000258754	LINC01579	0	0	0.012777	0	0	0.007307
ENST00000558382	ENSG00000259275	AC087477.2	0	0	0.056993	0	0	0
ENST00000528696	ENSG00000254744	AC084855.1	0	0	0.0062	0	0	0
ENST00000565467	ENSG00000260807	AC009041.2	0	0	0.002293	0	0	0
ENST00000652759	ENSG00000262668	AJ003147.2	0	0	0.016231	0	0	0
ENST00000572691	ENSG00000263072	ZNF213-AS1	0	0	0.013892	0	0	4e-06
ENST00000648010	ENSG00000262468	LINC01569	0	0	0.020122	0	0	0
ENST00000622471	ENSG00000276096	RF00017	0	0	0.012317	0	0	0
ENST00000574883	ENSG00000262332	AC136624.1	0	0	0.031532	0	0	0
ENST00000568603	ENSG00000260277	AC009019.1	0	0	0.008296	0	0	0
ENST00000562280	ENSG00000260034	LCMT1-AS2	0	0	0.002683	0	0	0
ENST00000613256	ENSG00000273553	AC016597.2	0	0	0.056967	0	0.021643	0.005447
ENST00000563806	ENSG00000238045	AC009133.1	0	0.000971	0.024352	0	0	0.000275
ENST00000568708	ENSG00000261124	AC135050.4	0	0	0.001752	0	0	0
ENST00000607580	ENSG00000272545	AC023813.4	0	0	0.026716	0	0	0
ENST00000567728	ENSG00000261644	AC007728.2	0.002765	0	0.009892	0.00013	0	0
ENST00000564147	ENSG00000261469	AC020978.4	0.000887	0	0.251794	0	0	0.002567
ENST00000561938	ENSG00000261537	AC027279.2	0	0	0.009016	0	0	0
ENST00000652701	ENSG00000260896	ARLNC1	0	0	0.014319	0	0	0
ENST00000652211	ENSG00000260896	ARLNC1	0	0	0.000918	0	0	0
ENST00000567342	ENSG00000260228	AC009119.1	0.00179	0	0.008961	0	0	0
ENST00000620845	ENSG00000278716	AC133540.1	0.007732	0	0.05216	0.010262	0.010298	0
ENST00000595886	ENSG00000268388	FENDRR	0	0	0.008246	0	0	0
ENST00000620306	ENSG00000277504	AC010536.3	0.007884	0.001353	0.087322	0	0.002559	0
ENST00000563687	ENSG00000260466	AC126696.2	0	0	0.004939	0	0	0
ENST00000563357	ENSG00000260528	FAM157C	0.004028	0	0.152055	0.002471	0.000872	0.047713
ENST00000620071	ENSG00000278794	RF00017	0	0	0.016322	0	0	0
ENST00000576489	ENSG00000186594	MIR22HG	0	0	0.344333	0.117756	0	0.059403
ENST00000571741	ENSG00000262692	AC116914.2	0	0	0.051804	0	0	0
ENST00000574307	ENSG00000262966	AC005695.1	0	0	0.003013	0	0	0
ENST00000399342	ENSG00000272736	AC005323.2	0	0	0.009292	0	0	0
ENST00000649037	ENSG00000234634	LINC02093	0	0	0.02143	0	0	0
ENST00000584772	ENSG00000265489	AC005358.2	0	0.000565	0.006929	0	0	0
ENST00000443696	ENSG00000237328	RAI1-AS1	0	0	0.001731	0	0	0
ENST00000582325	ENSG00000265511	AC020558.2	0	0	0.007508	0	0	0
ENST00000578819	ENSG00000265205	AC010761.4	0	0	0.019575	0	0	0
ENST00000412403	ENSG00000228768	AC003101.1	0	0	0.021339	0	0	0
ENST00000584499	ENSG00000266340	AC138207.7	0	0	0.003898	0	0	0
ENST00000635600	ENSG00000267002	AC060780.1	0.000995	0.005122	0.013786	0	0	0
ENST00000642336	ENSG00000267002	AC060780.1	0	0	0.001824	0	0	0
ENST00000588097	ENSG00000267750	RUNDC3A-AS1	0	0	0.001017	0	0	0
ENST00000592422	ENSG00000267278	MAP3K14-AS1	0	0	0.004676	0	0	0
ENST00000608940	ENSG00000272763	AC103702.2	0	0	0.019468	0	0	0
ENST00000577189	ENSG00000266100	AC007431.2	0	0	0.011669	0	0	0
ENST00000577267	ENSG00000264112	AC015813.1	0.002983	0.021899	0.296881	0.024206	0.024563	0.058596
ENST00000583416	ENSG00000265912	AC037487.1	0	0	0.00023	0	0	0
ENST00000650446	ENSG00000285877	AC007448.4	0	0	0.001287	0	0	0
ENST00000363913	ENSG00000200783	RN7SKP180	0	0	0.077683	0	0.018867	0
ENST00000583910	ENSG00000264829	AC087749.2	0	0	0.010036	0	0	0
ENST00000586808	ENSG00000266980	AC087289.2	0	0.000561	0.015398	0	0	0
ENST00000568363	ENSG00000234912	SNHG20	0	0	0.013153	0	0	0
ENST00000564414	ENSG00000234912	SNHG20	0	0	0.00725	0	0	0
ENST00000568056	ENSG00000234912	SNHG20	0	0	0.004425	0	0	0
ENST00000648926	ENSG00000234912	SNHG20	0	0	0.06298	0	0	0
ENST00000649047	ENSG00000234912	SNHG20	0	0	0.019877	0	0	0
ENST00000592569	ENSG00000266970	AC061992.1	0	0	0.004582	0	0	0
ENST00000430912	ENSG00000229848	AC139149.1	4e-06	0	0.000195	0	0	7e-06
ENST00000582591	ENSG00000266397	AP000919.3	0	0	0.076775	0.027283	0	0
ENST00000581905	ENSG00000264235	AP005329.1	0	0.014284	0.048458	0	0	0
ENST00000591141	ENSG00000267583	AC007998.3	0	0	0.02127	0	0	0
ENST00000618230	ENSG00000274184	AC011815.2	0	0	0.011162	0	0	0
ENST00000589510	ENSG00000267193	AC023421.2	0	0	0.020931	0	0	0
ENST00000599498	ENSG00000269365	AC120349.1	0	0	0.02566	0	0	0
ENST00000591360	ENSG00000267257	AC105105.1	0	0	0.068149	0	0	0
ENST00000585706	ENSG00000267316	AC090409.2	0.009827	0.006562	0.033106	0	0	0
ENST00000637973	ENSG00000283667	AC009802.1	0.000101	4.1e-05	0.008055	0	0	0.000154
ENST00000588380	ENSG00000266990	AC004528.1	0	0	0.006098	0	0	0
ENST00000589365	ENSG00000267063	AC006130.1	0	0	0.03099	0	0	0
ENST00000590159	ENSG00000267255	AC011498.3	0.001927	0	0.028479	0	0.003565	0.008333
ENST00000588192	ENSG00000267563	AC011471.2	0	0	0.016339	0	0	0
ENST00000589751	ENSG00000267273	AC008567.2	0	0	0.011842	0	0	0
ENST00000590046	ENSG00000266950	AC008752.1	0	0	0.029564	0.002938	0.004089	0
ENST00000591596	ENSG00000267004	AC018761.1	0	0	0.028141	0	0	0
ENST00000590715	ENSG00000267783	AC022098.3	0	0	0.004397	0.001282	0.000538	0.000252
ENST00000586698	ENSG00000266913	LINC01841	0	0	0.032361	0	0	0
ENST00000587343	ENSG00000267703	AC020917.2	0	0	0.04168	0	0	0.024516
ENST00000586645	ENSG00000266904	LINC00663	0	0	0.023711	4e-06	0	0
ENST00000588150	ENSG00000261824	LINC00662	0	0	0.031789	0	0	0
ENST00000587645	ENSG00000267437	AC012309.2	0	0	0.041494	0	0	0
ENST00000599092	ENSG00000268764	AC011465.1	0	0	0.0066	0	0	0
ENST00000614316	ENSG00000278239	AC243967.3	0	0	0.007545	0	0	0
ENST00000594624	ENSG00000213904	LIPE-AS1	0	0	0.017645	0	0	0
ENST00000596116	ENSG00000213904	LIPE-AS1	0	0	0.0316	0	0	0
ENST00000591530	ENSG00000267395	DM1-AS	0	0	0.007352	0	0	0
ENST00000600765	ENSG00000268889	AC008750.7	0	0	0.01245	0	0	0
ENST00000593857	ENSG00000268015	AC010320.2	0	0	0.005273	0	0	0
ENST00000426976	ENSG00000232057	AC093390.1	0	0	0.002511	0	0	0
ENST00000435175	ENSG00000228496	AC106875.1	0	0	0.007304	0	0	0
ENST00000432142	ENSG00000236204	LINC01376	0	0	0.010001	0	0	0
ENST00000435682	ENSG00000229621	LINC01822	0	0	0.065029	0	0	0.029318
ENST00000434897	ENSG00000224165	DNAJC27-AS1	0	0	0.001744	0	0	0
ENST00000446073	ENSG00000229224	AC105398.1	0	0	0.01269	0	0	0
ENST00000416279	ENSG00000223647	LINC01946	0	0	0.012759	0	0	0
ENST00000585654	ENSG00000232973	CYP1B1-AS1	0	0	0.037488	0	0	0
ENST00000620177	ENSG00000232973	CYP1B1-AS1	0	0	0.006817	0	0	0
ENST00000446698	ENSG00000231312	MAP4K3-DT	0	0	0.033444	0	0	0
ENST00000593878	ENSG00000227028	SLC8A1-AS1	0	0	0.004032	0	0	0
ENST00000422201	ENSG00000233845	AC093732.1	0	0	0.042839	0	0	0
ENST00000635306	ENSG00000282998	AC009975.2	0	0	0.00598	0	0	0
ENST00000626206	ENSG00000238018	AC093110.1	0	0	0.027253	0	0	0
ENST00000625841	ENSG00000240401	AC012358.3	0	0.000451	0.019317	0	0	0
ENST00000431020	ENSG00000230923	LINC00309	0	0	0.005168	0	0	0
ENST00000450294	ENSG00000235885	LINC01828	0	0	0.000113	0	0	0
ENST00000628692	ENSG00000235885	LINC01828	0	0	0.00757	0	0	0
ENST00000418990	ENSG00000237737	DCTN1-AS1	0	0	0.010949	0	0	0
ENST00000598281	ENSG00000235522	AC010978.1	0	0	0.000757	0	0	0
ENST00000567491	ENSG00000259863	SH3RF3-AS1	0.009764	0.023969	0.31382	0.028311	0.011578	0.022544
ENST00000585381	ENSG00000235066	AC009303.2	0	0	0.000215	0	0	0
ENST00000627205	ENSG00000231731	AC010976.1	0	0	0.004079	0	0	0
ENST00000444406	ENSG00000231890	DARS-AS1	0	0	0.011244	0	0	0
ENST00000453636	ENSG00000237772	LINC02631	0	0	0.025133	0	0	0
ENST00000420472	ENSG00000226674	TEX41	0	0.000509	0.012337	0.000928	0	0.00043
ENST00000602006	ENSG00000238057	ZEB2-AS1	0	0	0.024051	0	0	0
ENST00000610947	ENSG00000238057	ZEB2-AS1	0	0	0.014569	0	0	0
ENST00000433174	ENSG00000162947	LINC01931	0	0	0.022193	0	0	0.008841
ENST00000430546	ENSG00000235335	AC016723.1	0	0	0.012014	0	0	0.007041
ENST00000456053	ENSG00000237298	TTN-AS1	0	0	0.004203	0	0	0
ENST00000609952	ENSG00000233766	AC098617.1	0	0	0.010424	0	0	0
ENST00000594911	ENSG00000226312	CFLAR-AS1	0	0	0.0054	0	0	0
ENST00000595372	ENSG00000226312	CFLAR-AS1	0	0	0.074894	0	0.001645	0
ENST00000412896	ENSG00000197585	AC068051.1	0	0	0.017013	0	0	0
ENST00000595058	ENSG00000227769	AC072062.1	0	0	0.013848	0.000262	0	0
ENST00000428487	ENSG00000237525	AC012668.3	0	0.001747	0.003701	0	0	0
ENST00000597288	ENSG00000267919	AC009955.2	0.003198	0	0.015503	0	0	0
ENST00000454058	ENSG00000225963	AC009950.1	0	0	0.025185	0	0	0
ENST00000595586	ENSG00000225963	AC009950.1	0.005119	0	0.05809	0.014998	0	0.011214
ENST00000625295	ENSG00000225963	AC009950.1	0.002471	0	0.074074	0.006594	0	0
ENST00000418430	ENSG00000227252	AC105760.2	0	0	0.010346	0	0	0
ENST00000434306	ENSG00000234235	BOK-AS1	0	0	0.016846	0	0	0
ENST00000455340	ENSG00000179935	LINC00652	0	0	0.007714	0	0	0
ENST00000582087	ENSG00000264879	RN7SL690P	0	0	0.003086	0	0	0
ENST00000455791	ENSG00000213742	ZNF337-AS1	0	0	0.005742	0	0	0.001979
ENST00000443171	ENSG00000230753	ZNF341-AS1	0	0	0.01331	0	0	0
ENST00000438154	ENSG00000227964	LINC01429	0	0	0.003674	0	0	0
ENST00000317652	ENSG00000179253	AL162457.1	0	0	0.004258	0	0	0
ENST00000621644	ENSG00000174403	MIR1-1HG-AS1	0	0	0.006718	0	0	0
ENST00000624412	ENSG00000274333	CU633967.1	0	0	0.001012	0	0	0
ENST00000624461	ENSG00000276077	CU633904.1	0	0	0.081641	0	0	0
ENST00000623575	ENSG00000275496	CU633906.1	0	0	0.003988	0.000963	0	0
ENST00000627623	ENSG00000281903	LINC02246	0	0	0.007397	0	0	0
ENST00000652633	ENSG00000270071	AP001172.1	0	0	0.000938	0	0	0
ENST00000427447	ENSG00000237945	LINC00649	0	0	0.000468	0	0	0
ENST00000450928	ENSG00000231355	AP000302.1	0	0.002957	0.02472	0	0	0
ENST00000608665	ENSG00000273104	AP000322.2	0	0	0.001248	0	0	0
ENST00000652428	ENSG00000227456	LINC00310	0	0	0.0309	0	0.012807	0
ENST00000431150	ENSG00000225218	AP001628.1	0	0	0.079151	0	0	0
ENST00000609953	ENSG00000272825	AL844908.1	0	0	0.007907	0	0	0
ENST00000435738	ENSG00000226115	AP001476.2	0	0	0.028607	0	0	0
ENST00000444998	ENSG00000215424	MCM3AP-AS1	0.00317	0.008421	0.029761	0	0.002966	0
ENST00000421927	ENSG00000215424	MCM3AP-AS1	0	0	0.000971	0	0	0
ENST00000616469	ENSG00000225783	MIAT	0	0	5e-06	0	0	0
ENST00000579233	ENSG00000266503	RN7SL162P	0	0	0.014925	0	0	0
ENST00000446578	ENSG00000182057	OGFRP1	0	0	0.022727	0	0.012767	0
ENST00000649077	ENSG00000285722	AC207130.1	0	0	0.003652	0	0	0
ENST00000650895	ENSG00000224271	AL117329.1	0	0	0.000769	0	0	0
ENST00000651104	ENSG00000224271	AL117329.1	0	0	0.006865	0	0	0
ENST00000438810	ENSG00000224271	AL117329.1	0	0	0.002491	0	0	0
ENST00000651270	ENSG00000224271	AL117329.1	0	0	0.013441	0	0	0
ENST00000652499	ENSG00000224271	AL117329.1	0	0	0.005693	0	0	0
ENST00000458666	ENSG00000227110	LMCD1-AS1	0	0	0.011373	0	0	0
ENST00000520396	ENSG00000206573	THUMPD3-AS1	0	0	0.011645	0	0	0
ENST00000649558	ENSG00000285731	AC090644.1	0	0	0.006283	0	0	0
ENST00000630335	ENSG00000232354	VIPR1-AS1	0	0	0.03013	0	0	0
ENST00000626234	ENSG00000232354	VIPR1-AS1	0	0	0.009933	0	0	0
ENST00000442534	ENSG00000232455	LARS2-AS1	0	0	0.004706	0	0	0
ENST00000635852	ENSG00000283646	LINC02009	0	0	0.085056	0	0	0
ENST00000609204	ENSG00000273356	LINC02019	0	0	0.02627	0	0	0
ENST00000496829	ENSG00000243572	LINC02017	0	0.012873	0.029052	0	0	0
ENST00000485347	ENSG00000239991	AC092059.1	0	0	0.00555	0	0	0
ENST00000606192	ENSG00000272146	ARF4-AS1	0	0.001386	0.024315	0.000121	0.00011	4.6e-05
ENST00000464125	ENSG00000244383	FAM3D-AS1	0	0	0.037322	0.009358	0	0.011575
ENST00000482609	ENSG00000241111	AC092040.1	0	0	0.022332	0	0	0.008037
ENST00000460754	ENSG00000272610	MAGI1-IT1	0	0	0.006681	0	0	0
ENST00000498480	ENSG00000243849	CFAP44-AS1	0	0	0.002823	0	0	0
ENST00000490351	ENSG00000240922	LSAMP-AS1	0	0	0.00678	0	0	0
ENST00000487309	ENSG00000244139	RN7SL397P	0	0	0.014337	0	0	0
ENST00000470236	ENSG00000239213	NCK1-DT	0	0	0.030077	0	0	0
ENST00000472821	ENSG00000243944	AC117386.2	0	0	0.003065	0	0	0
ENST00000486168	ENSG00000244040	IL12A-AS1	0	0	0.021405	0	0	0
ENST00000642756	ENSG00000244040	IL12A-AS1	0	0.003794	0.026144	0	0.004758	0.003397
ENST00000602385	ENSG00000270141	TERC	0.0118	0.032451	2.45481	0.561628	0.014748	0.002665
ENST00000487580	ENSG00000239219	AC008040.1	0	0	0.000108	0	0	0
ENST00000466064	ENSG00000243799	PEX5L-AS1	0	0	0.010298	0	0	0
ENST00000602704	ENSG00000270178	AC007687.1	0	0	0.01622	0	0	0
ENST00000629126	ENSG00000197099	AC068631.1	0	0	0.002201	0	0	0
ENST00000650913	ENSG00000286004	AC124944.4	0.004873	0	0.027637	0	0.0008	0
ENST00000629823	ENSG00000242086	MUC20-OT1	0	0	1e-06	0	0	0
ENST00000594446	ENSG00000242086	MUC20-OT1	0	0	0.011547	0	0	0
ENST00000468356	ENSG00000242686	AC107464.1	0	0	0.004031	0	0	0
ENST00000509015	ENSG00000248516	AC105415.1	0.001286	0.00568	0.017407	0	0	0
ENST00000515205	ENSG00000251580	LINC02482	3e-05	3e-06	0.002633	0.000103	8e-06	1.2e-05
ENST00000504402	ENSG00000245468	LINC02447	0	0	0.028874	0	0.010177	0
ENST00000510095	ENSG00000249631	AC005699.1	0	0	0.011844	0	0	0
ENST00000506195	ENSG00000248300	LINC02360	0	0	0.011964	0	0	0
ENST00000514339	ENSG00000251679	AC073848.1	0	0	0.005319	0	0	0
ENST00000503085	ENSG00000251009	AC133961.1	0	0	0.006239	0	0	0
ENST00000510420	ENSG00000249882	LINC02501	0	0	0.018416	0	0	0
ENST00000508112	ENSG00000249341	AC124017.1	0	0	0.005361	0	0	0
ENST00000501239	ENSG00000245928	AC112719.2	0	0	0.00169	0	0	0
ENST00000503589	ENSG00000248719	AC021127.1	0	0	3e-05	0	0	0
ENST00000651069	ENSG00000180769	WDFY3-AS2	0	0	0.004975	0	0	0
ENST00000506057	ENSG00000249509	AC023886.1	0	0	0.012475	0	0	0
ENST00000508959	ENSG00000248152	AC093879.1	0	0	0.014533	0	0	0
ENST00000505289	ENSG00000250241	AC105383.1	0	0	0.007333	0.003708	0	0
ENST00000512752	ENSG00000248346	AC092435.1	0	0	0.008248	0	0	0
ENST00000623885	ENSG00000280005	AC079298.2	0	0	0.010922	0	0	0
ENST00000506895	ENSG00000249084	AC027627.1	0	0	0.00731	0	0	0
ENST00000607691	ENSG00000272049	AC091965.4	0	0	0.014363	0	0	0
ENST00000510648	ENSG00000249937	LINC02223	0	0	0.001365	0	0	0
ENST00000652008	ENSG00000286134	AC114930.1	0	0	8.6e-05	0	0	0
ENST00000505518	ENSG00000248279	LINC02120	0	0	0.002467	0	0	0
ENST00000652363	ENSG00000249102	AC034223.1	0.003868	0	0.020966	0	0	0.007941
ENST00000510433	ENSG00000248969	AC137810.1	0	0	0.000633	0	0	0
ENST00000636516	ENSG00000249740	OSMR-AS1	0	0	0.014453	0	0	0
ENST00000503452	ENSG00000251141	MRPS30-DT	0	0	0.025632	0	0	0
ENST00000513880	ENSG00000251573	LINC02106	0	0	0.023525	0	0	0
ENST00000652284	ENSG00000286048	AC008966.3	0	0	0.0044	0	0	0
ENST00000438553	ENSG00000235635	AC016644.1	0	0	0.003557	0	0	0
ENST00000502647	ENSG00000249198	AC106822.1	0	0	0.002491	0	0	0
ENST00000457499	ENSG00000233847	AC022445.1	0	0.000136	0.010757	0.000171	0.001997	0
ENST00000646307	ENSG00000250802	ZBED3-AS1	0	0	0.067581	0	0	0
ENST00000645374	ENSG00000250802	ZBED3-AS1	0	0	0.04116	0	0.000962	0
ENST00000513591	ENSG00000250802	ZBED3-AS1	0	0	3e-06	0	0	0
ENST00000503349	ENSG00000249061	AC109492.1	0	0	0.000213	0	0	0
ENST00000639552	ENSG00000248309	MEF2C-AS1	0	0	0.008493	0	0	0
ENST00000513694	ENSG00000247828	TMEM161B-AS1	0	0	0.002551	0	0	0
ENST00000512724	ENSG00000247828	TMEM161B-AS1	0	0	0.048705	0	0	0
ENST00000445770	ENSG00000233828	LINC01949	0	0	0.006281	0	0	0
ENST00000649405	ENSG00000248323	LUCAT1	0.00215	0.000465	0.012017	0	0	0
ENST00000650003	ENSG00000248323	LUCAT1	0	0.00148	0.007895	0	0	0.000659
ENST00000649467	ENSG00000248323	LUCAT1	0.003404	0.004076	0.063771	0	0	0.015758
ENST00000606233	ENSG00000237187	NR2F1-AS1	0	0.019046	0.194788	0	0	0
ENST00000515570	ENSG00000249249	AC010226.1	0.007199	0.005969	0.080944	0.012707	0.006982	0
ENST00000569928	ENSG00000261036	AC113418.1	0	0	0.049063	0	0	0
ENST00000607804	ENSG00000272139	AC113349.2	0	0	0.022666	0	0	0.0113
ENST00000512779	ENSG00000250602	AC093535.1	0	0	0.015493	0	0	0
ENST00000502776	ENSG00000248245	AC010307.2	0	0	0.018373	0	0	0
ENST00000510230	ENSG00000249639	AC022092.1	0	0.003962	0.020711	0	0	0
ENST00000507058	ENSG00000248753	AC008406.2	0	0	0.003909	0	0	0
ENST00000512875	ENSG00000249593	AC011405.1	0	0	0.001277	0	0	0
ENST00000515288	ENSG00000231185	SPRY4-AS1	0	0.02653	0.137915	0	0	0
ENST00000433595	ENSG00000226272	ARHGAP26-AS1	0	0.008451	0.021814	0	0	0
ENST00000505261	ENSG00000249605	AC008652.1	0	0.003134	0.020786	0	0	0
ENST00000514002	ENSG00000251556	AC091887.1	0	0	0.011783	0	0	0
ENST00000520980	ENSG00000251330	AC114939.1	0	0	0.013806	0	0	0
ENST00000602964	ENSG00000249669	CARMN	0.000615	0	0.002035	0	0.000288	8e-06
ENST00000646143	ENSG00000254186	AC113414.1	0	0	0.002339	0	0	0
ENST00000519821	ENSG00000253768	AC008663.1	0	0	0.018217	0	0	0
ENST00000505870	ENSG00000250903	GMDS-DT	0	0	0.006201	0	0.003211	0
ENST00000472178	ENSG00000183674	LINC00518	0	0	0.02747	0	0	0.002529
ENST00000444265	ENSG00000272168	CASC15	0	0	0.006843	0	0	0
ENST00000410583	ENSG00000222515	RN7SKP240	0	0	0.000532	0	0	0
ENST00000647036	ENSG00000225914	TSBP1-AS1	0	0	0.003671	0	0	0
ENST00000646176	ENSG00000225914	TSBP1-AS1	0	0	0.014784	0	0	0
ENST00000650432	ENSG00000285888	Z85996.2	0	0.005061	0.020791	0	0	0
ENST00000430595	ENSG00000235033	AL590999.1	0	0	0.013394	0.004043	0	0
ENST00000441845	ENSG00000236996	MLIP-IT1	0	0	0.00546	0	0	0
ENST00000609545	ENSG00000226803	ZNF451-AS1	0	0	0.005617	0	0	0
ENST00000651778	ENSG00000233237	LINC00472	0	0	0.000163	0	0	0
ENST00000415964	ENSG00000227678	AL355581.1	0	0	0.002385	0	0	0
ENST00000609978	ENSG00000227678	AL355581.1	0	0	0.000654	0	0	0
ENST00000422700	ENSG00000228495	LINC01013	0	0	0.004351	0	0	0
ENST00000417483	ENSG00000231971	AL078590.2	0	0	0.031531	0	0	0
ENST00000419926	ENSG00000237596	AL138828.1	0	0	0.004608	0	0	0
ENST00000607749	ENSG00000272189	AL024508.2	0	0	0.008993	0	0	0
ENST00000456896	ENSG00000236013	AL357146.1	0	0	0.073365	0	0	0
ENST00000418834	ENSG00000236013	AL357146.1	0	0	0.029232	0	0	0
ENST00000606686	ENSG00000272397	AL138916.2	0	0	0.007971	0	0	0
ENST00000451712	ENSG00000233893	EZR-AS1	0	0	0.006396	0	0	0
ENST00000417244	ENSG00000198221	AFDN-DT	0	0	0.018558	0	0	0
ENST00000412014	ENSG00000226323	AC006150.1	0	0	0.025018	0	0	0
ENST00000439120	ENSG00000214870	AC004540.1	0	0	5e-06	0	0	0
ENST00000420774	ENSG00000214870	AC004540.1	0	0	0.003105	0	0	0
ENST00000449537	ENSG00000214870	AC004540.1	0	0	0.033138	0	0	0
ENST00000614528	ENSG00000222004	C7orf71	0	0	0.006486	0	0	0
ENST00000495032	ENSG00000233429	HOTAIRM1	0	0	0.008337	0	0	0
ENST00000517641	ENSG00000253552	HOXA-AS2	0	0.00127	0.016621	0	0	0
ENST00000521687	ENSG00000253552	HOXA-AS2	0	0	0.028795	0	0	0
ENST00000593438	ENSG00000253552	HOXA-AS2	0.008489	0.003017	0.149323	0.011605	0.02528	0.014202
ENST00000415848	ENSG00000224116	INHBA-AS1	0	0	0.001185	0	0	0
ENST00000422822	ENSG00000224116	INHBA-AS1	0	0	0.014529	0.004523	0	0
ENST00000398043	ENSG00000214293	APTR	1.4e-05	0.00011	0.009841	0.000113	0.000136	5e-05
ENST00000610086	ENSG00000182165	TP53TG1	0	0	0.000257	0	0	1.4e-05
ENST00000566572	ENSG00000261535	AC005086.1	0	0	0.005431	0	0	0
ENST00000435466	ENSG00000226965	AC092167.1	0	0	0.005467	0	0	0
ENST00000450063	ENSG00000231210	LINC01510	0	0	0.035511	0	0	0
ENST00000483283	ENSG00000240571	AC087071.2	0	0	0.019587	0	0.000241	0
ENST00000447307	ENSG00000226380	AC016831.1	0	0	0.062245	0	0	0
ENST00000497366	ENSG00000239377	AC073111.1	0	0	0.032553	0	0	0
ENST00000652322	ENSG00000182648	LINC01006	0	0	0.002052	0	0	0
ENST00000517950	ENSG00000254160	AC110288.1	0	0	0.013477	0	0	0
ENST00000649853	ENSG00000253678	AC104964.2	0	0	0.002228	0	0	0
ENST00000523664	ENSG00000246430	LINC00968	0	0.00348	0.017854	0	0	0.000474
ENST00000518750	ENSG00000253523	AC104350.1	0	0	1.6e-05	0	0	0
ENST00000520930	ENSG00000253190	AC084082.1	0	0	0.06923	0	0	0
ENST00000522183	ENSG00000249395	CASC9	0	0	2.3e-05	0	0	0
ENST00000523977	ENSG00000253661	ZFHX4-AS1	0.00296	0.009181	0.067866	0.000366	0.007402	0.000246
ENST00000476144	ENSG00000241550	RN7SL41P	0	0	0.005371	0	0	0
ENST00000521625	ENSG00000253740	AP001205.1	0	0	0.014627	0	0	0
ENST00000519630	ENSG00000253633	AP002852.1	0	0	0.008118	0	0	0
ENST00000520750	ENSG00000253320	AZIN1-AS1	0	0	0.011443	0.003041	0	0.002503
ENST00000518978	ENSG00000253320	AZIN1-AS1	0	0	0.005548	0	0	0
ENST00000522416	ENSG00000254236	AP003550.1	0	0	0.00246	0	0	0
ENST00000606457	ENSG00000271830	AC012213.4	0.008013	0.010342	0.058979	0	0.013833	0
ENST00000499522	ENSG00000247081	BAALC-AS1	0	0	4.9e-05	0	0	0
ENST00000505156	ENSG00000249917	LINC00536	0	0	0.003023	0	0	0
ENST00000577765	ENSG00000263443	AC100872.1	0	0	0.003198	0	0	0
ENST00000646670	ENSG00000253438	PCAT1	0	0	0.001019	0	0	0
ENST00000524320	ENSG00000253438	PCAT1	0	0	0.023782	0.006011	0	0
ENST00000523318	ENSG00000253992	AC103726.2	0	0	0.009676	0	0	0
ENST00000518831	ENSG00000247317	LY6E-DT	0.000559	0.001614	0.033171	0.000325	0.000242	0.000299
ENST00000521207	ENSG00000253716	MINCR	0.000904	0	0.113727	0	0	0
ENST00000429980	ENSG00000277631	PGM5P3-AS1	0	0	0.002098	0	0	0
ENST00000614900	ENSG00000277631	PGM5P3-AS1	0	0	0.012236	0	0	0
ENST00000421645	ENSG00000227914	AL136979.1	0	0	0.007604	0	0	0
ENST00000609982	ENSG00000273226	AL391834.2	0.003138	0.025195	0.214799	0.003829	0.0105	0.005534
ENST00000583719	ENSG00000240498	CDKN2B-AS1	0.005678	0	0.028269	0	0	0
ENST00000585478	ENSG00000204706	MAMDC2-AS1	0	0	0.012356	0	0	0
ENST00000594708	ENSG00000268364	SMC5-AS1	0	0	0.05454	0	0	0
ENST00000647325	ENSG00000225937	PCA3	0	0	0.001557	0	0	0
ENST00000413352	ENSG00000233086	LNCARSR	0	0	0.023267	0	0	0
ENST00000448389	ENSG00000235298	AL354733.3	0	0.021335	0.127618	0.003178	0.032798	0.006134
ENST00000429700	ENSG00000224945	AL353150.1	0	0	0.014607	0	0	0
ENST00000600140	ENSG00000268926	AL354861.3	0	0	0.003543	0	0	0
ENST00000642165	ENSG00000228714	AL691420.1	0	0	0.007778	0	0	0
ENST00000652329	ENSG00000286078	AL391056.2	0	0	0.069171	0	0	0
ENST00000589540	ENSG00000236986	AL157938.2	0	0	6.1e-05	0	1.9e-05	0
ENST00000455039	ENSG00000225361	PPP1R26-AS1	1.5e-05	0	0.025848	6e-06	0.013474	6e-05
ENST00000435463	ENSG00000229257	AL807752.2	0.012524	0	1.20107	0	0.116871	0.11599
ENST00000627721	ENSG00000281849	AL732314.6	0	0	0.058987	0	0.002023	0.002363
ENST00000483854	ENSG00000285756	BX890604.2	0	0.234619	0.765804	0	0	0
ENST00000475317	ENSG00000285756	BX890604.2	0.004152	0.001076	0.207492	0	0.006009	0.003943
ENST00000431486	ENSG00000231216	AC004674.1	0	0	0.004114	0	0	0
ENST00000443965	ENSG00000235385	LINC02154	0.00748	0	0.143881	0	0	0.001343
ENST00000422438	ENSG00000238178	AC078993.1	0	0	0.013957	0	0	0
ENST00000454712	ENSG00000238178	AC078993.1	0	0	0.003764	0	0	0
ENST00000424026	ENSG00000225037	EIF1AX-AS1	0	0	0.010443	0	0	0
ENST00000651462	ENSG00000286181	AC232271.3	0	0	0.004521	0	0	0.002592
ENST00000639539	ENSG00000230590	FTX	0	0	0.003172	0	0	5.7e-05
ENST00000592070	ENSG00000227060	LINC00629	0	0	0.038752	0	0	0.016938
ENST00000370438	ENSG00000238039	AC244197.2	0.005782	0	0.046913	0	0	0
ENST00000596412	ENSG00000241769	LINC00893	0	0	0.094568	0	0	0.02214
ENST00000431025	ENSG00000241769	LINC00893	0	0	3e-06	0	0	1e-06
ENST00000449111	ENSG00000235703	LINC00894	0	0	0.044604	0.013171	0	0
ENST00000437309	ENSG00000231447	AC244102.1	0	0	0.006063	0	0	0
ENST00000434164	ENSG00000228787	NLGN4Y-AS1	0	0	0.024833	0	0	0
ENST00000477476	ENSG00000241188	RN7SL165P	0	0	0.000783	0	0	0
ENST00000450811	ENSG00000234318	AC099794.1	0	0	0.025705	0	0	0
ENST00000440762	ENSG00000233973	LINC01360	0	0	0.002207	0	0	0
ENST00000609675	ENSG00000273487	AC104836.1	0	0	0.006609	0	0	0
ENST00000554808	ENSG00000258673	LINC01397	0	0	0.01338	0	0	0
ENST00000609800	ENSG00000272971	AL365181.4	0	0	0.015622	0	0	0
ENST00000434447	ENSG00000225857	AL162431.1	0	0	0.005524	0	0	0
ENST00000439570	ENSG00000224535	AC092803.1	0	0	0.023565	0	0	0
ENST00000442712	ENSG00000235021	AL591848.2	0	0	0.009336	0	0	0
ENST00000445932	ENSG00000236968	AL451164.1	0	0	0.012923	0	0	0
ENST00000439319	ENSG00000226083	SLC39A12-AS1	0	0	0.004346	0	0	0
ENST00000437677	ENSG00000236208	C10orf71-AS1	0	0	0.022696	0	0	0
ENST00000648218	ENSG00000285958	AC073174.1	0	0	0.002534	0	0	0
ENST00000552096	ENSG00000257582	LINC01475	0	0	0.011038	0	0	0
ENST00000611956	ENSG00000273980	AL592071.1	0	0	0.023387	0	0	0
ENST00000528319	ENSG00000255429	AP003400.1	0	0	0.007108	0	0	0
ENST00000647864	ENSG00000285561	AP001804.1	0	0	0.001717	0	0	0
ENST00000412084	ENSG00000225231	LINC02470	0	0	0.00883	0	0	0
ENST00000551357	ENSG00000257935	LHX5-AS1	0	0	0.01637	0	0	0
ENST00000542620	ENSG00000255946	AC069234.1	0	0	0.023941	0	0	0
ENST00000619123	ENSG00000275265	AC127002.1	0	0	0.018593	0	0	0
ENST00000566370	ENSG00000261097	LINC00563	0	0	0.006104	0	0	0
ENST00000427717	ENSG00000229557	LINC00379	0	0	0.019826	0	0	0
ENST00000547786	ENSG00000257842	LINC02588	0	0	0.014486	0	0	0
ENST00000553621	ENSG00000258517	AC004817.1	0	0	0.010932	0	0	0
ENST00000557070	ENSG00000258859	LINC02296	0	0	0.00769	0	0	0
ENST00000555299	ENSG00000258499	LINC02287	0	0	0.004659	0	0	0
ENST00000557745	ENSG00000258393	AL049833.1	0	0	0.033231	0	0	0
ENST00000555328	ENSG00000258497	AL359682.1	0	0	0.003432	0	0	0
ENST00000556528	ENSG00000258913	AL590079.1	0	0	0.012132	0	0	0
ENST00000616350	ENSG00000273925	AC084757.4	0	0	0.009531	0	0	0
ENST00000647994	ENSG00000285663	AC108457.1	0	0	0.008196	0	0	0
ENST00000559569	ENSG00000259760	AC015660.2	0	0	0.017375	0	0	0
ENST00000561523	ENSG00000261623	LINC02179	0	0	0.002326	0	0	0
ENST00000563124	ENSG00000261751	AC007603.1	0	0	0.003952	0	0	0
ENST00000650200	ENSG00000269186	LINC01082	0	0	0.004652	0	0	0
ENST00000378347	ENSG00000205018	AC092384.1	0	0	0.004732	0	0	0
ENST00000614522	ENSG00000273816	AC005695.3	0.001359	0	0.028361	0	0.004372	0
ENST00000374983	ENSG00000204283	LINC01973	0	0	0.001783	0	0	0
ENST00000576738	ENSG00000262585	LINC01979	0	0	0.001621	0	0	0
ENST00000651113	ENSG00000286126	AP001095.1	0	0	0.011055	0	0	0
ENST00000581648	ENSG00000266489	AC007922.3	0	0	0.002965	0	0	0
ENST00000586383	ENSG00000267501	AC104365.2	0	0	0.011547	0	0	0
ENST00000562582	ENSG00000259779	LINC01922	0	0	0.009983	0	0	0
ENST00000589512	ENSG00000267406	AC011509.1	0	0	0.026052	0	0	0
ENST00000588945	ENSG00000267275	AC020911.2	0	0	0.027276	0	0	0
ENST00000651161	ENSG00000286080	AC011477.8	0	0	0.007539	0	0	0
ENST00000600419	ENSG00000267696	ERVK-28	0	0	0.003989	0	0	0
ENST00000588402	ENSG00000267006	AC008507.2	0	0	0.007266	0	0	0
ENST00000587218	ENSG00000267522	LINC01864	0	0	0.010255	0	0	0.005919
ENST00000418358	ENSG00000236008	LINC01814	0	0	0.00458	0	0	0
ENST00000421976	ENSG00000235997	LINC01936	0	0	0.005789	0	0	0
ENST00000398796	ENSG00000214691	LINC01913	0	0	0.009001	0	0	0
ENST00000632044	ENSG00000282033	AC074387.1	0	0	0.010383	0	0	0.005973
ENST00000438850	ENSG00000267338	AP000365.1	0	0	0.010672	0	0	0
ENST00000447372	ENSG00000226954	AL023802.1	0	0	0.004527	0	0	0
ENST00000649475	ENSG00000285969	AC087591.1	0	0	0.01423	0	0	0
ENST00000647668	ENSG00000285614	AC026100.1	0	0	0.008063	0.003263	0	0
ENST00000607746	ENSG00000271856	LINC01215	0	0	0.006593	0	0	0
ENST00000462531	ENSG00000241336	LINC01487	0	0	0.009442	0	0	0
ENST00000625878	ENSG00000242512	LINC01206	0	0	0.00958	0	0	0
ENST00000431427	ENSG00000238020	HTR3E-AS1	0	0	0.012811	0	0	0
ENST00000651324	ENSG00000250038	AC093791.1	0	0	0.008045	0	0	0
ENST00000514855	ENSG00000249228	AC068944.1	0	0	0.02131	0	0	0
ENST00000509932	ENSG00000250125	LINC02232	0	0	0.001916	0	0	0
ENST00000417927	ENSG00000227145	IL21-AS1	0	0	0.00456	0	0	0
ENST00000504509	ENSG00000250266	LINC01612	0	0	0.007257	0	0	0
ENST00000507628	ENSG00000250056	LINC01018	0	0	0.026321	0	0	0
ENST00000508677	ENSG00000248455	LINC02217	0	0	0.014402	0	0	0
ENST00000505844	ENSG00000248455	LINC02217	0	0	0.01863	0	0	0
ENST00000507674	ENSG00000249404	AC010445.1	0	0	0.012781	0	0	0
ENST00000564402	ENSG00000260786	AC108099.1	0	0	0.00097	0	0	0
ENST00000510145	ENSG00000250682	LINC00491	0	0	0.009052	0	0	0
ENST00000410774	ENSG00000222706	RN7SKP89	0	0	0.029661	0	0	0
ENST00000504107	ENSG00000248663	LINC00992	0	0	0.012376	0	0	0
ENST00000514657	ENSG00000251538	LINC02201	0	0	0.012594	0	0	0
ENST00000512748	ENSG00000250564	AC109454.3	0	0	0.025546	0	0	0
ENST00000464317	ENSG00000240250	RN7SL541P	0	0	0.025464	0	0	0.008106
ENST00000423149	ENSG00000242753	AL445430.2	0	0	0.037369	0	0	0
ENST00000622203	ENSG00000277473	RF00017	0	0	0.002571	0	0	0
ENST00000427011	ENSG00000233981	AL022396.1	0	0	0.019933	0	0	0
ENST00000314481	ENSG00000175967	FO393415.1	0	0	0.004461	0	0	0
ENST00000421500	ENSG00000233977	AC099681.3	0	0	0.007813	0	0.003335	0
ENST00000618280	ENSG00000275853	RF00017	0	0	0.028109	0	0	0
ENST00000438324	ENSG00000232756	AC004990.1	0	0	0.012944	0	0	0
ENST00000438065	ENSG00000225128	LINC00972	0	0	0.010193	0	0	0
ENST00000648666	ENSG00000285624	AC025062.3	0	0	0.008311	0	0	0
ENST00000519691	ENSG00000254290	AC124067.4	0	0	0.001772	0	0	0
ENST00000523507	ENSG00000253181	AC138356.3	0	0	0.013917	0	0	0
ENST00000516031	ENSG00000251840	RN7SKP155	0	0	0.008011	0	0	0
ENST00000583427	ENSG00000263612	AF186192.3	0	0	0.004151	0	0	0
ENST00000429581	ENSG00000226717	PTPRD-AS2	0	0	0.001107	0	0	0
ENST00000428006	ENSG00000226197	AL583785.1	0	0	0.00639	0	0	0
ENST00000614030	ENSG00000275649	AL445584.2	0	0	0.029316	0	0	0
ENST00000417576	ENSG00000224825	RORB-AS1	0	0	0.007254	0	0	0
ENST00000562814	ENSG00000261435	AL592164.1	0	0	0.004324	0	0	0
TCONS_00022031	ENSG00000171621	SPSB1	0	0	0.011268	0	0	0
TCONS_00003997	ENSG00000020633	RUNX3	0	0	0.072724	0	0	0
TCONS_00024038	ENSG00000090020	SLC9A1	0	0.00047	0.023651	0.002389	0.004091	0
TCONS_00004364	ENSG00000175707	KDF1	0	0	0.072126	0	0	0.016737
TCONS_00005164	XLOC_002256	XLOC_002256	0	0	0.074214	0	0	0.019241
TCONS_00005242	XLOC_002279	XLOC_002279	0	0	0.067639	0	0.001666	0.003767
TCONS_00025091	XLOC_010097	XLOC_010097	0	0	0.075482	0.013943	0	0
TCONS_00006089	XLOC_002633	XLOC_002633	0	0	0.030332	0	0	0
TCONS_00008175	ENSG00000184588	PDE4B	0	0	0.012994	0	0	0
TCONS_00008952	XLOC_003620	XLOC_003620	0	0	0.033872	0	0	0
TCONS_00008937	XLOC_003610	XLOC_003610	0	0	0.028101	0	0	0
TCONS_00009382	ENSG00000171488	LRRC8C	0	0.00478	0.033316	0.006008	0	0
TCONS_00010036	XLOC_004119	XLOC_004119	0.002222	0.001873	0.147454	0.011731	0.001126	0.001993
TCONS_00010345	XLOC_004270	XLOC_004270	0.013225	0	0.132662	0	0.030984	0
TCONS_00029435	XLOC_011880	XLOC_011880	0.001827	0	0.049322	0.002203	0	0.004089
TCONS_00011569	XLOC_004784	XLOC_004784	0	0	0.058932	0.007975	0	0
TCONS_00030592	XLOC_012403	XLOC_012403	0.004332	0	0.035474	0	0	0
TCONS_00012442	ENSG00000178104	PDE4DIP	0	0	0.120891	0.000205	0	0
TCONS_00012733	ENSG00000118292	C1orf54	0	0.150027	0.417038	0	0	0
TCONS_00031766	XLOC_012832	XLOC_012832	0	0.023125	0.099626	0	0	0
TCONS_00012920	ENSG00000143458	GABPB2	0.000329	0	0.150594	0	0.002695	0.006793
TCONS_00013483	ENSG00000160691	SHC1	0	0	0.022682	0.009313	0	0
TCONS_00014086	ENSG00000198400	NTRK1	0	0	0.016016	0	0	0
TCONS_00014310	ENSG00000213085	CFAP45	0	0	0.082073	0	0	0
TCONS_00016034	ENSG00000143344	RGL1	0	0	0.131514	0	0	0
TCONS_00016564	ENSG00000143355	LHX9	0	0	0.003351	0	0	0
TCONS_00017218	XLOC_006987	XLOC_006987	0	0	0.018314	0	0	0
TCONS_00036171	ENSG00000163531	NFASC	0.022935	0	0.120354	0	0	0
TCONS_00017710	ENSG00000076356	PLXNA2	0	0	0.041158	0	0	0.015335
TCONS_00017847	ENSG00000054392	HHAT	0	0	0.000986	0	0	0
TCONS_00019465	ENSG00000182118	FAM89A	0	0	0.120506	0	0	0.008983
TCONS_00019585	ENSG00000162946	DISC1	0	0	0.093818	0	0	0
TCONS_00038818	ENSG00000121644	DESI2	0	0	0.079073	0	0	0
TCONS_00047398	XLOC_019818	XLOC_019818	0	0	0.026193	0	0	0
TCONS_00039497	XLOC_016279	XLOC_016279	0	0	0.064022	0	0	0
TCONS_00047537	ENSG00000108021	TASOR2	0	0	0.137908	0	0	0.001496
TCONS_00040208	ENSG00000176244	ACBD7	0	0	0.030352	0	0	0
TCONS_00049390	XLOC_020794	XLOC_020794	0.010639	0	0.090421	0.005674	0	0
TCONS_00041876	ENSG00000277758	FO681492.1	0	0	0.051352	0	0	0
TCONS_00042658	ENSG00000138336	TET1	0.122655	0.034244	3.50731	0.015781	0.243089	0.414214
TCONS_00051179	ENSG00000156110	ADK	0	0	0.010161	0	0	0
TCONS_00044018	XLOC_018312	XLOC_018312	0	0	0.12878	4.3e-05	4.2e-05	0
TCONS_00051860	XLOC_021969	XLOC_021969	0	0	0.096737	0	0	0
TCONS_00044858	ENSG00000107521	HPS1	0	0	0.158101	0	0	0
TCONS_00052904	ENSG00000166189	HPS6	0	0	0.121575	0	0	0
TCONS_00046899	ENSG00000132334	PTPRE	0	0.009399	0.586116	0.001101	0	0
TCONS_00054675	XLOC_023189	XLOC_023189	0	0	0.03448	0	0	0
TCONS_00066902	ENSG00000254827	SLC22A18AS	0	0.021564	0.046174	0	0	0
TCONS_00056495	ENSG00000133816	MICAL2	0.03878	0.024334	0.52012	0.039752	0.04324	0.036018
TCONS_00057185	ENSG00000187398	LUZP2	0.005519	0.02053	0.115131	0	0.00143	0.006152
TCONS_00071139	ENSG00000134780	DAGLA	0	0	0.004037	0	0	0
TCONS_00061122	ENSG00000173715	C11orf80	0	0	0.005124	0	0	0
TCONS_00061607	ENSG00000172927	MYEOV	0	0	0.029369	0	0	0
TCONS_00061619	ENSG00000172927	MYEOV	0	0	0.026139	0	0	0
TCONS_00073268	ENSG00000162105	SHANK2	0.003202	0	0.058808	0	0	0
TCONS_00062088	XLOC_025757	XLOC_025757	0	0.000972	0.006906	0	0	0
TCONS_00074034	ENSG00000182704	TSKU	0	0	0.087441	0	0	0
TCONS_00062664	ENSG00000087884	AAMDC	0	0.008411	0.083778	0	0	0
TCONS_00063203	XLOC_026166	XLOC_026166	0	0	0.211864	0	0.024611	0.010898
TCONS_00063204	XLOC_026166	XLOC_026166	0	0	0.263007	0	0.123843	0.021808
TCONS_00063211	XLOC_026166	XLOC_026166	0	0	0.081253	0	0	0
TCONS_00077437	ENSG00000149557	FEZ1	0.04669	0.045131	0.197305	0	0	0
TCONS_00089285	XLOC_035949	XLOC_035949	0.004193	0.000738	0.073899	0.020434	0	0.001186
TCONS_00078600	ENSG00000139192	TAPBPL	0	0	0.16449	0	0	0
TCONS_00079508	ENSG00000139083	ETV6	0	0.00098	0.184743	0	0	0.000514
TCONS_00090357	ENSG00000231887	PRH1	0	0	0.502822	0	0.007683	0
TCONS_00079962	XLOC_032514	XLOC_032514	0	0	0.029528	0	0	0
TCONS_00090865	ENSG00000172572	PDE3A	0	0	0.005904	0	0	0
TCONS_00090879	ENSG00000111700	SLCO1B3	0	0	0.011106	0	0	0
TCONS_00080828	XLOC_032840	XLOC_032840	0	0	0.037922	0	0	0
TCONS_00091878	ENSG00000139174	PRICKLE1	0	0.006465	0.115643	0	0	0.009686
TCONS_00081314	ENSG00000179715	PCED1B	0.001219	0.00238	0.105052	0.012754	0.001453	0.005703
TCONS_00081415	XLOC_033144	XLOC_033144	0	0	0.155366	0	0	0
TCONS_00081521	XLOC_033184	XLOC_033184	0	0	0.015205	0	0	0
TCONS_00094675	ENSG00000198673	FAM19A2	0	0	0.168935	0	0	0
TCONS_00094674	ENSG00000198673	FAM19A2	0	0.004927	0.079905	0.002223	0	0
TCONS_00094695	ENSG00000111110	PPM1H	0	0	0.09711	0	0	0
TCONS_00095044	XLOC_038031	XLOC_038031	0	0	0.01509	0	0	0
TCONS_00095389	ENSG00000173401	GLIPR1L1	0	0	0.014908	0	0	0
TCONS_00096000	XLOC_038555	XLOC_038555	0	0	0.016927	0	0	0
TCONS_00086516	ENSG00000139438	FAM222A	0	0	0.000249	0	0	0
TCONS_00097698	ENSG00000198270	TMEM116	0	0	0.107087	0	0.040334	0.002797
TCONS_00097936	XLOC_039272	XLOC_039272	0	0	0.027115	0	0	0.002411
TCONS_00098022	XLOC_039335	XLOC_039335	0	0	0.074935	0.000109	0	0
TCONS_00088078	ENSG00000179195	ZNF664	0	0	0.027649	0	0	0
TCONS_00088332	XLOC_035641	XLOC_035641	0	0	0.02123	0	0	0
TCONS_00100097	ENSG00000273167	AL359736.1	0.025265	0	0.20718	0.009482	0.074154	0
TCONS_00100187	ENSG00000132932	ATP8A2	0	0	0.022118	0	0	0
TCONS_00100442	XLOC_040275	XLOC_040275	0	0	0.01824	0	0	0
TCONS_00100485	XLOC_040312	XLOC_040312	0	0	0.015061	0	0	0
TCONS_00104725	XLOC_042404	XLOC_042404	0	0	0.009252	0	0	0
TCONS_00104862	ENSG00000133121	STARD13	0.015373	0.006739	0.179388	0.015517	0.006542	0.004915
TCONS_00104929	XLOC_042493	XLOC_042493	0	0.000269	0.043917	0	0	0
TCONS_00105495	ENSG00000120658	ENOX1	0.041862	0.009709	0.190082	0.019353	0	0.018228
TCONS_00101532	ENSG00000136169	SETDB2	0.021859	0.170408	0.545274	0.005386	0	0.004076
TCONS_00102788	XLOC_041484	XLOC_041484	0.004974	0	0.059952	0	0	0
TCONS_00107901	ENSG00000134905	CARS2	0	0	0.035279	0	0	0
TCONS_00117508	XLOC_047776	XLOC_047776	0	0	0.010581	0	0	0
TCONS_00110812	XLOC_045328	XLOC_045328	0	0	0.046048	0	0	0
TCONS_00111696	ENSG00000182185	RAD51B	0.00214	0.000947	0.167682	0.00094	0	0.000884
TCONS_00112871	XLOC_046102	XLOC_046102	0	0	0.082962	0	0	0
TCONS_00119825	XLOC_048823	XLOC_048823	0	0	0.059136	0	0	0
TCONS_00119860	XLOC_048857	XLOC_048857	0	0	0.013315	0	0	0
TCONS_00113623	ENSG00000168398	BDKRB2	0	0	0.013239	0	0	0
TCONS_00128917	XLOC_052330	XLOC_052330	0	0	0.044156	0	0	0
TCONS_00123424	ENSG00000214013	GANC	0	0	0.12917	0	0.028558	0.047538
TCONS_00123593	ENSG00000067369	TP53BP1	0	0	0.019338	0	0	0
TCONS_00130421	XLOC_052856	XLOC_052856	0	0	0.089824	0	0	0
TCONS_00131189	ENSG00000128918	ALDH1A2	0	0	0.007157	0	0	0
TCONS_00131192	ENSG00000128918	ALDH1A2	0	0	0.004747	0	0	0
TCONS_00131523	ENSG00000171914	TLN2	0	0	0.052742	0	0	0
TCONS_00133377	ENSG00000080644	CHRNA3	0	0	0.1269	0.016864	0.004858	0
TCONS_00133641	ENSG00000172349	IL16	0.021781	0	0.104541	0	0.034753	0
TCONS_00127446	XLOC_051717	XLOC_051717	0	0.019847	0.043376	0	0	0
TCONS_00136847	ENSG00000267795	SMIM22	0.044448	0	0.183957	0	0	0
TCONS_00146427	XLOC_057700	XLOC_057700	0	0	0.012633	0	0	0
TCONS_00147541	ENSG00000255524	NPIPB8	0.016426	0	0.081111	0	0	0
TCONS_00139084	ENSG00000174939	ASPHD1	0	0.004857	0.114405	0.021734	0	0
TCONS_00142259	ENSG00000103043	VAC14	0	0	0.033814	0	0	0
TCONS_00151654	ENSG00000103196	CRISPLD2	0	0	0.028738	0	0	0
TCONS_00151685	XLOC_059406	XLOC_059406	0	0.003638	0.166974	0	0	0
TCONS_00151727	XLOC_059423	XLOC_059423	0	0.017668	0.055127	0	0	0
TCONS_00152136	ENSG00000176715	ACSF3	0	0	0.147445	0	0	0
TCONS_00143487	ENSG00000167515	TRAPPC2L	0	0	0.153584	0	0	0.077183
TCONS_00152751	ENSG00000132388	UBE2G1	0	0	0.17341	0	0	0
TCONS_00152948	XLOC_059785	XLOC_059785	0	0	0.100559	0	0	0
TCONS_00154671	ENSG00000108448	TRIM16L	0	0	0.004147	0	0	0
TCONS_00157019	ENSG00000212722	KRTAP4-9	0	0	0.023182	0	0	0
TCONS_00169361	XLOC_064893	XLOC_064893	0	0	0.07739	0	0	0
TCONS_00158630	ENSG00000182742	HOXB4	0	0	0.001597	0	0	0
TCONS_00170144	XLOC_065189	XLOC_065189	0	0	0.06243	0	0	0.016522
TCONS_00160330	ENSG00000108854	SMURF2	0	0	0.380948	0	0	0
TCONS_00173103	ENSG00000171302	CANT1	0	0	0.350366	0.00061	0	0
TCONS_00162812	ENSG00000175711	B3GNTL1	0	0	0.01002	0	0	0
TCONS_00174707	XLOC_066640	XLOC_066640	0	0	0.016496	0	0	0
TCONS_00174704	XLOC_066639	XLOC_066639	0	0	0.030849	0	0	0.01183
TCONS_00174786	XLOC_066684	XLOC_066684	0	0	0.020013	0	0	0
TCONS_00175693	XLOC_067085	XLOC_067085	0.003371	0	0.033586	0	0.001852	0
TCONS_00179407	ENSG00000141441	GAREM1	0	0.000936	0.179256	0.006633	0.025732	0.066189
TCONS_00176104	XLOC_067234	XLOC_067234	0	0	0.011582	0	0	0
TCONS_00177497	XLOC_067900	XLOC_067900	0	0	0.072583	0	0	0
TCONS_00183339	ENSG00000125730	C3	0	0.001989	0.021237	0	0	0
TCONS_00195430	ENSG00000161888	SPC24	0	0	3.02757	0.728185	0	0
TCONS_00195954	ENSG00000132026	RTBDN	0	0	0.086367	0	0	0
TCONS_00189736	ENSG00000007255	TRAPPC6A	0	0	0.01216	0	0	0
TCONS_00201728	ENSG00000142552	RCN3	0	0	0.095797	0	0	0
TCONS_00192532	ENSG00000186230	ZNF749	0	0	0.400378	0	0	0
TCONS_00219458	XLOC_082797	XLOC_082797	0	0	0.097855	0	0	0
TCONS_00204780	XLOC_076605	XLOC_076605	0	0	0.026161	0	0	0
TCONS_00204871	XLOC_076732	XLOC_076732	0	0	0.074553	0	0	0
TCONS_00221422	ENSG00000162961	DPY30	0.046041	0	0.589591	0.002471	0	0
TCONS_00222183	ENSG00000284701	TMEM247	0	0	0.083503	0	0	0
TCONS_00222536	ENSG00000115239	ASB3	0	0.006163	0.051386	0	0	0
TCONS_00223160	ENSG00000143951	WDPCP	0	0	0.530979	0	0	0
TCONS_00208561	XLOC_078220	XLOC_078220	0	0.022966	0.123874	0	0	0
TCONS_00210073	ENSG00000241962	AC079447.1	6.2e-05	0	0.083411	0	0.00209	0
TCONS_00210450	XLOC_079085	XLOC_079085	0	0	0.086576	0	0	0
TCONS_00226718	XLOC_085785	XLOC_085785	0	0	0.068433	0	0	0
TCONS_00211174	XLOC_079385	XLOC_079385	0	0	0.059673	0	0	0
TCONS_00211601	XLOC_079579	XLOC_079579	0	0	0.050397	0	0	0
TCONS_00227496	ENSG00000136731	UGGT1	0	0	0.241338	0	0	0
TCONS_00212584	ENSG00000144227	NXPH2	0	0	0.01532	0	0	0
TCONS_00228493	XLOC_086680	XLOC_086680	0	0	0.008166	0	0	0
TCONS_00228491	XLOC_086680	XLOC_086680	0	0	0.048446	0	0	0
TCONS_00229343	XLOC_087141	XLOC_087141	0	0	0.03325	0	0	0
TCONS_00230835	ENSG00000144366	GULP1	0	0	0.014967	0	0	0
TCONS_00231106	XLOC_087869	XLOC_087869	0.001251	0	0.076545	0	0.017846	0
TCONS_00231224	ENSG00000118997	DNAH7	0	0	0.027157	0	0	0
TCONS_00232098	ENSG00000144401	METTL21A	0	0	0.133958	0	0	0
TCONS_00216482	ENSG00000021826	CPS1	0	0	0.042068	0	0	0
TCONS_00216525	XLOC_081753	XLOC_081753	0	0.007686	0.020591	0	0	0
TCONS_00217551	ENSG00000085449	WDFY1	0.006739	0.009575	0.098038	0	0	0
TCONS_00218089	ENSG00000156973	PDE6D	0	0	0.004024	0	0	0
TCONS_00233675	ENSG00000168918	INPP5D	0	0	0.011674	0	0	0
TCONS_00236369	ENSG00000149609	C20orf144	0	0	0.068187	0	0	0
TCONS_00236904	ENSG00000149633	KIAA1755	0	0.002615	0.042486	0	0.000961	0
TCONS_00237093	XLOC_090379	XLOC_090379	0	0	0.024426	0	0	0
TCONS_00242196	XLOC_092536	XLOC_092536	0	0.004844	0.02118	0	0	0
TCONS_00237291	XLOC_090461	XLOC_090461	0	0	0.039114	0	0	0
TCONS_00243444	ENSG00000256222	MTRNR2L3	0	0	0.336666	0	0	0
TCONS_00238596	ENSG00000087460	GNAS	0	0	0.189665	0	0	0
TCONS_00239208	ENSG00000196421	C20orf204	0	0	0.026662	0	0	0
TCONS_00244230	XLOC_093488	XLOC_093488	0	0	0.075308	0.024942	0	0
TCONS_00247097	XLOC_094732	XLOC_094732	0	0	0.156237	0	0	0
TCONS_00244797	XLOC_093793	XLOC_093793	0	0	0.060128	0	0	0
TCONS_00247639	XLOC_095007	XLOC_095007	0	0.014933	0.099545	0.022193	0	0
TCONS_00247709	XLOC_095070	XLOC_095070	0	0	0.0751	0	0	0
TCONS_00248711	ENSG00000157554	ERG	0	0.004623	0.071209	0	0	0
TCONS_00249010	XLOC_095659	XLOC_095659	0	0	0.022667	0	0	0
TCONS_00254202	XLOC_097637	XLOC_097637	0	0	0.090584	0	0	0
TCONS_00252433	XLOC_097027	XLOC_097027	0	0	0.034044	0	0	0
TCONS_00252479	ENSG00000166897	ELFN2	0	0	0.104634	0	0	0
TCONS_00256790	XLOC_098591	XLOC_098591	0	0	0.017214	0	0	0
TCONS_00256792	XLOC_098591	XLOC_098591	0	0	0.111342	0.030577	0	0
TCONS_00258441	ENSG00000175928	LRRN1	0.000105	0.000107	0.00378	0.000103	4.6e-05	0.000279
TCONS_00259641	ENSG00000154814	OXNAD1	0	0	0.049411	0	0	0
TCONS_00260031	ENSG00000151093	OXSM	0	0.072344	0.458223	0.087767	0	0
TCONS_00260942	XLOC_099988	XLOC_099988	0	0	0.021228	0	0	0
TCONS_00277015	XLOC_106369	XLOC_106369	0.01363	0.010372	0.08789	0.006102	0.004138	0.011367
TCONS_00264775	XLOC_101486	XLOC_101486	0	0	0.03679	0	0	0
TCONS_00264786	XLOC_101494	XLOC_101494	0	0	0.06061	0	0	0
TCONS_00265774	ENSG00000160145	KALRN	0	0	0.083025	0	0.001435	0.019219
TCONS_00266682	XLOC_102266	XLOC_102266	0	0	0.059557	0	0	0
TCONS_00279839	ENSG00000181804	SLC9A9	0	0	0.044184	0	0	0
TCONS_00280177	ENSG00000206199	ANKUB1	0.004489	0.000834	0.055927	0.004227	0.002331	0.00984
TCONS_00292636	ENSG00000184985	SORCS2	0	0	0.033824	0	0	0
TCONS_00284238	ENSG00000163995	ABLIM2	0	0	0.013872	0	0	0
TCONS_00284230	ENSG00000196526	AFAP1	0	0	0.018439	0	0	0
TCONS_00292757	XLOC_113371	XLOC_113371	0	0	0.135267	0	0	0
TCONS_00292900	ENSG00000002587	HS3ST1	0	0	0.036841	0	0	0.020398
TCONS_00293403	XLOC_113752	XLOC_113752	0	0	0.000361	0	0	0
TCONS_00293411	XLOC_113752	XLOC_113752	0	0	0.041999	0	0	0
TCONS_00293402	XLOC_113752	XLOC_113752	0	0	0.015694	0	0	0
TCONS_00285353	ENSG00000047365	ARAP2	0	0	0.071061	0	0	0.019567
TCONS_00293981	ENSG00000174125	TLR1	0	0.002655	0.00835	0	0	0
TCONS_00285685	ENSG00000064042	LIMCH1	0	0	0.035909	0	0	0
TCONS_00294331	XLOC_114241	XLOC_114241	0	0	0.054877	0	0	0
TCONS_00295111	ENSG00000145242	EPHA5	0	0	0.065317	0	0	0
TCONS_00295718	XLOC_114918	XLOC_114918	0	0	0.040821	0	0	0
TCONS_00287251	ENSG00000138759	FRAS1	0	0	0.065396	0	0	0
TCONS_00287631	ENSG00000138639	ARHGAP24	0	0	0.114666	0	0	0
TCONS_00297324	XLOC_115476	XLOC_115476	0	0	0.012505	0	0	0
TCONS_00297599	ENSG00000180801	ARSJ	0.018985	0.000981	0.095344	0.007567	0.001228	0.013829
TCONS_00289246	ENSG00000164074	ABHD18	0.000388	0.000124	0.002651	0	0.000357	0
TCONS_00298876	ENSG00000164169	PRMT9	0	0.005518	0.185692	0.037103	0.006958	0.001912
TCONS_00298880	XLOC_116223	XLOC_116223	0	0	0.013016	0	0	0
TCONS_00299191	XLOC_116349	XLOC_116349	0	0	0.077507	0	0	0
TCONS_00291185	XLOC_112609	XLOC_112609	0	0	0.088213	0	0	0.052289
TCONS_00299993	XLOC_116804	XLOC_116804	0.003998	0	0.08857	0	0	0
TCONS_00291276	XLOC_112682	XLOC_112682	0	0	0.014212	0	0	0
TCONS_00291285	XLOC_112682	XLOC_112682	0	0	0.096086	0	0	0
TCONS_00300066	ENSG00000218336	TENM3	0	0	0.004259	0	0	0
TCONS_00291683	ENSG00000164344	KLKB1	0.000846	0.000862	0.206853	0	0	0.000764
TCONS_00312237	XLOC_122398	XLOC_122398	0	0	0.031332	0	0	0
TCONS_00312350	ENSG00000183580	FBXL7	0	0	0.00123	0	0	0
TCONS_00312437	ENSG00000176788	BASP1	0.003735	0	0.038246	0	0	0
TCONS_00302700	ENSG00000170571	EMB	0	0	0.034338	0	0.014474	0
TCONS_00314131	ENSG00000164287	CDC20B	0	0	0.047145	0	0	0
TCONS_00314643	XLOC_123716	XLOC_123716	0	0	0.080679	0	0	0
TCONS_00303342	XLOC_118596	XLOC_118596	0	0	0.087493	0	0	0
TCONS_00314642	XLOC_123716	XLOC_123716	0	0	0.165343	0.014077	0	0
TCONS_00314608	XLOC_123689	XLOC_123689	0	0	0.020738	0	0	0
TCONS_00303304	XLOC_118570	XLOC_118570	0	0	0.084885	0	0.048341	0
TCONS_00303640	XLOC_118723	XLOC_118723	0	0	0.055089	0	0	0
TCONS_00304144	XLOC_118890	XLOC_118890	0	0	0.100184	0	0	0.024516
TCONS_00304272	ENSG00000164338	UTP15	0	0	0.026429	0	0	0
TCONS_00304613	ENSG00000284762	AC022414.1	0	0	0.310811	0	0	0
TCONS_00316445	XLOC_124597	XLOC_124597	0	0	0.156787	0	0.054212	0
TCONS_00316446	XLOC_124597	XLOC_124597	0	0.016061	0.083886	0	0	0
TCONS_00305505	ENSG00000113391	FAM172A	0	0	0.001697	0	0	0
TCONS_00306107	ENSG00000145743	FBXL17	0	0	0.116156	0	0	0
TCONS_00317241	ENSG00000152495	CAMK4	0.004918	0	0.092705	0	0	0
TCONS_00306392	XLOC_119995	XLOC_119995	0	0	0.095324	0	0	0
TCONS_00306728	ENSG00000184838	PRR16	0	0	0.337089	0.160597	0	0
TCONS_00308015	ENSG00000170482	SLC23A1	0.016823	0	0.069723	0	0	0
TCONS_00319480	ENSG00000113555	PCDH12	0	0	0.119682	0	0	0
TCONS_00309310	XLOC_121159	XLOC_121159	0	0	0.013332	0	0	0
TCONS_00309272	ENSG00000145888	GLRA1	0	0	0.121318	0	0	0
TCONS_00320509	ENSG00000285868	AC008676.3	0.014559	0	0.053945	0	0	0
TCONS_00320590	XLOC_126567	XLOC_126567	0	0	0.106111	0	0	0
TCONS_00309730	ENSG00000170234	PWWP2A	0	0.053647	3.24678	0.016306	0.004998	0
TCONS_00310289	XLOC_121574	XLOC_121574	0	0	0.07022	0	0	0
TCONS_00310976	ENSG00000170074	FAM153A	0	0	0.014524	0	0	0
TCONS_00310977	ENSG00000170074	FAM153A	0	0	0.011792	0	0	0
TCONS_00311404	XLOC_121961	XLOC_121961	0	0	0.005712	0	0	0
TCONS_00322769	ENSG00000124785	NRN1	0	0	0.020231	0	0	0
TCONS_00334229	ENSG00000124788	ATXN1	0	0	0.031568	0	0	0
TCONS_00334940	XLOC_133625	XLOC_133625	0	0	0.013947	0	0	0
TCONS_00325550	ENSG00000240065	PSMB9	0	0	0.356729	0	0	0.018169
TCONS_00325553	ENSG00000240065	PSMB9	0	0	0.060567	0	0	0
TCONS_00326181	XLOC_128924	XLOC_128924	0.013503	0.004944	0.094969	0.014793	0	0.006106
TCONS_00329256	ENSG00000279170	TSTD3	0	0.000679	0.073867	0.001353	0.001492	0
TCONS_00340530	XLOC_136162	XLOC_136162	0	0	0.078038	0	0	0
TCONS_00330423	XLOC_131257	XLOC_131257	0	0.001888	0.08442	0	0.003865	0.001368
TCONS_00330467	XLOC_131302	XLOC_131302	0	0	0.113935	0	0	0
TCONS_00330678	ENSG00000111912	NCOA7	0	0	0.056393	0	0	0.023458
TCONS_00331727	XLOC_131961	XLOC_131961	0	0	0.16477	0.056336	0	0
TCONS_00342501	XLOC_137099	XLOC_137099	0	0.015699	0.115475	0	0	0
TCONS_00342541	XLOC_137109	XLOC_137109	0.004905	0	0.083124	0	0	0
TCONS_00343351	ENSG00000112541	PDE10A	0	0	5.7e-05	0	0	0
TCONS_00332962	XLOC_132498	XLOC_132498	0	0	0.124394	0	0	0
TCONS_00343584	ENSG00000184465	WDR27	0	0	0.015316	0	0	0
TCONS_00346234	XLOC_138651	XLOC_138651	0	0.007289	0.018139	0	0	0
TCONS_00346285	ENSG00000002746	HECW1	0	0	0.037683	0	0	0
TCONS_00357085	XLOC_143120	XLOC_143120	0	0	0.071687	0	0	0
TCONS_00358789	ENSG00000075213	SEMA3A	0	0	0.011946	0	0	0
TCONS_00349274	ENSG00000127928	GNGT1	0	0	0.371224	0	0	0
TCONS_00350324	ENSG00000173678	SPDYE2B	0	0	0.169919	0.006313	0.001547	0
TCONS_00360315	ENSG00000161040	FBXL13	0	0	0.122964	0	0	0
TCONS_00351635	XLOC_140797	XLOC_140797	0	0	0.019378	0	0.009682	0
TCONS_00363247	ENSG00000106617	PRKAG2	0.054639	0	0.262382	0	0	0.033245
TCONS_00353475	XLOC_141600	XLOC_141600	0	0	0.011321	0	0	0
TCONS_00363416	XLOC_145661	XLOC_145661	0	0	0.048558	0	0	0
TCONS_00371817	ENSG00000180190	TDRP	0	0	0.054804	0	0	0
TCONS_00372556	XLOC_149782	XLOC_149782	0.017892	0	0.141842	0	0	0
TCONS_00372626	ENSG00000003987	MTMR7	0	0	0.022445	0	0	0
TCONS_00365230	ENSG00000147459	DOCK5	0.009482	0	0.085433	0	0	0.01995
TCONS_00365574	XLOC_146498	XLOC_146498	0	0	0.06873	0	0	0
TCONS_00367270	XLOC_147290	XLOC_147290	0	0	0.169639	0	0.032978	0
TCONS_00375302	XLOC_151043	XLOC_151043	0	0	0.038105	0	0.005215	0
TCONS_00367891	XLOC_147580	XLOC_147580	0	0	0.058595	0	0.030255	0
TCONS_00375746	ENSG00000147601	TERF1	0	0	0.060198	0	0	0
TCONS_00368542	ENSG00000176571	CNBD1	0	0	0.007843	0	0	0
TCONS_00369156	XLOC_148251	XLOC_148251	0	0	0.009931	0	0	0
TCONS_00377561	XLOC_152128	XLOC_152128	0.029075	0	0.14066	0	0	0
TCONS_00369657	XLOC_148468	XLOC_148468	0	0	0.027565	0	0	0
TCONS_00378578	XLOC_152745	XLOC_152745	0	0	0.021163	0	0	0
TCONS_00371093	XLOC_149213	XLOC_149213	0	0.000954	0.097738	0.002581	0.027025	0
TCONS_00379730	ENSG00000171045	TSNARE1	0	0.010853	0.053252	0	0.016488	0
TCONS_00381657	XLOC_153885	XLOC_153885	0	0	0.056395	0	0	0
TCONS_00382021	ENSG00000120156	TEK	0	0	0.011921	0	0	0
TCONS_00382137	XLOC_154292	XLOC_154292	0.008586	0.005663	0.066491	0	0	0
TCONS_00391703	XLOC_158671	XLOC_158671	2e-06	0	0.062484	0	0	0
TCONS_00383822	ENSG00000187210	GCNT1	0	0	0.062926	0	0	0.006563
TCONS_00384011	XLOC_155181	XLOC_155181	0	0.000964	0.033488	0	0	0
TCONS_00386191	XLOC_156373	XLOC_156373	0	0	0.112599	0	0	0
TCONS_00386273	ENSG00000041982	TNC	0.002278	0.002908	0.054157	0.006478	0	0
TCONS_00395883	ENSG00000171097	KYAT1	0	0	0.380772	0.155642	0	0
TCONS_00388284	ENSG00000122133	PAEP	0	0.041966	0.142093	0	0	0.018211
TCONS_00388282	ENSG00000122133	PAEP	0	0.01782	0.069047	0	0	0.009106
TCONS_00397086	XLOC_161235	XLOC_161235	0	0	0.043155	0	0	0
TCONS_00405216	XLOC_165197	XLOC_165197	0	0.000176	0.012181	0	0	0
TCONS_00398367	ENSG00000184368	MAP7D2	0	0	0.035635	0	0	0
TCONS_00399340	XLOC_162314	XLOC_162314	0	0	0.059309	0	0	0
TCONS_00406585	ENSG00000068400	GRIPAP1	0	0	0.012276	0	0	0
TCONS_00407523	ENSG00000079482	OPHN1	0	0	0.151102	0	0	0
TCONS_00403446	ENSG00000182195	LDOC1	0	0	0.032387	0	0	0
TCONS_00412060	XLOC_168774	XLOC_168774	0	0	0.08936	0	0	0
TCONS_00000904	XLOC_000653	XLOC_000653	0	0.002189	0.087734	0	0	0
TCONS_00000126	XLOC_000059	XLOC_000059	0	0	0.062064	0	0	0
TCONS_00000124	XLOC_000059	XLOC_000059	0	0	6.9e-05	0	0	0
TCONS_00000507	XLOC_000365	XLOC_000365	0	0	0.016164	0	0	0
TCONS_00001037	XLOC_000771	XLOC_000771	0	0	0.018425	0	0	0
TCONS_00022244	XLOC_008993	XLOC_008993	0	0	0.015205	0	0	0
TCONS_00025436	ENSG00000116981	NT5C1A	0	0	0.105898	0	0	0
TCONS_00015534	XLOC_006179	XLOC_006179	0	0	0.030797	0	0	0
TCONS_00016537	XLOC_006703	XLOC_006703	0	0	0.118061	0	0	0
TCONS_00016806	XLOC_006826	XLOC_006826	0	0	0.026389	0	0	0
TCONS_00035998	XLOC_014495	XLOC_014495	0	0	0.084872	0	0	0
TCONS_00036527	XLOC_014752	XLOC_014752	0	0	0.117593	0	0.006071	0
TCONS_00048824	XLOC_020497	XLOC_020497	0	0	0.074739	0	0	0
TCONS_00048853	XLOC_020505	XLOC_020505	0	0	0.007756	0	0	0
TCONS_00041006	XLOC_016905	XLOC_016905	0	0	0.053969	0	0	0
TCONS_00044559	XLOC_018589	XLOC_018589	0	0	0.082165	0	0	0
TCONS_00063982	XLOC_026545	XLOC_026545	0	0.021489	0.045055	0	0	0
TCONS_00079745	XLOC_032402	XLOC_032402	0	0	0.005401	0	0	0
TCONS_00091685	XLOC_036818	XLOC_036818	0	0	0.036128	0	0	0
TCONS_00080876	XLOC_032882	XLOC_032882	0	0	0.071209	0	0	0.021246
TCONS_00083569	XLOC_033734	XLOC_033734	0	0	0.074957	0	0	0
TCONS_00100480	XLOC_040309	XLOC_040309	0	0	0.037479	0	0	0
TCONS_00107053	XLOC_043587	XLOC_043587	0	0	0.009565	0	0	0
TCONS_00129554	XLOC_052600	XLOC_052600	0	0	0.012396	0	0	0
TCONS_00126348	XLOC_051339	XLOC_051339	0	0	0.013099	0	0	0
TCONS_00134185	XLOC_054143	XLOC_054143	0	0	0.075398	0	0	0
TCONS_00153963	XLOC_060072	XLOC_060072	0	0	0.023936	0	0	0
TCONS_00174048	XLOC_066338	XLOC_066338	0	0	0.036832	0	0	0
TCONS_00178786	XLOC_068461	XLOC_068461	0	0	0.101972	0	0	0
TCONS_00175673	XLOC_067069	XLOC_067069	0	0	0.045453	0	0.017675	0
TCONS_00181462	XLOC_069777	XLOC_069777	0	0	0.071507	0	0	0
TCONS_00198436	XLOC_074817	XLOC_074817	0	0	0.045574	0	0	0
TCONS_00202256	XLOC_075762	XLOC_075762	0	0	0.089671	0	0	0
TCONS_00221641	XLOC_083704	XLOC_083704	0	0	0.023499	0.008137	0	0
TCONS_00206309	XLOC_077258	XLOC_077258	0	0.021285	0.083653	0	0	0
TCONS_00207214	XLOC_077678	XLOC_077678	0	0.017003	0.074182	0	0	0
TCONS_00223512	XLOC_084530	XLOC_084530	0	0	0.072111	0	0	0
TCONS_00223780	ENSG00000163235	TGFA	0	0	0.001964	0	0.000506	0
TCONS_00226906	XLOC_085874	XLOC_085874	0	0	0.067705	0	0	0
TCONS_00238304	XLOC_090883	XLOC_090883	0	0	0.030501	0	0	0
TCONS_00244812	XLOC_093807	XLOC_093807	0	0	0.049537	0	0	0
TCONS_00255471	ENSG00000133454	MYO18B	0	0	0.107659	0	0	0
TCONS_00271253	XLOC_104173	XLOC_104173	0	0	0.080197	0	0	0
TCONS_00277220	XLOC_106537	XLOC_106537	0	0	0.124563	0	0	0
TCONS_00279872	XLOC_107616	XLOC_107616	0	0	0.103024	0	0	0.01466
TCONS_00286111	XLOC_110240	XLOC_110240	0	0	0.008494	0	0	0
TCONS_00286112	XLOC_110240	XLOC_110240	0	0	0.017172	0	0	0
TCONS_00295022	XLOC_114583	XLOC_114583	0	0	0.054713	0	0	0
TCONS_00286711	ENSG00000173597	SULT1B1	0	0	0.060275	0	0	0
TCONS_00298897	XLOC_116229	XLOC_116229	0	0	0.027014	0	0	0
TCONS_00291496	XLOC_112841	XLOC_112841	0	0	0.015397	0	0	0
TCONS_00312166	XLOC_122334	XLOC_122334	0.016119	0	0.059966	0	0	0
TCONS_00303356	XLOC_118609	XLOC_118609	0	0	0.045666	0	0.025049	0
TCONS_00303408	XLOC_118628	XLOC_118628	0	0	0.011591	0	0	0
TCONS_00314732	XLOC_123777	XLOC_123777	0	0	0.073984	0	0	0
TCONS_00305281	XLOC_119415	XLOC_119415	0	0	0.049537	0	0	0
TCONS_00316584	XLOC_124639	XLOC_124639	0	0	0.029617	0	0	0
TCONS_00316949	ENSG00000205359	SLCO6A1	0	0	0.017964	0	0	0
TCONS_00316950	ENSG00000205359	SLCO6A1	0	0	0.013235	0	0	0
TCONS_00306076	XLOC_119848	XLOC_119848	0	0	0.037214	0	0	0
TCONS_00306589	XLOC_120107	XLOC_120107	0	0	0.103787	0.023145	0	0
TCONS_00336180	XLOC_134046	XLOC_134046	0	0	0.049472	0.018346	0	0
TCONS_00338808	XLOC_135263	XLOC_135263	0	0	0.018852	0	0	0
TCONS_00329289	XLOC_130623	XLOC_130623	0	0	0.056403	0	0	0
TCONS_00340556	XLOC_136187	XLOC_136187	0	0	0.075278	0	0	0
TCONS_00341447	XLOC_136665	XLOC_136665	0	0.013126	0.099908	0	0	0
TCONS_00342981	XLOC_137326	XLOC_137326	0	0	0.076638	0	0	0
TCONS_00355431	XLOC_142458	XLOC_142458	0	0	0.013301	0	0	0
TCONS_00346946	XLOC_139009	XLOC_139009	0	0	0.018536	0	0	0
TCONS_00346947	XLOC_139010	XLOC_139010	0	0	0.026092	0	0	0
TCONS_00361024	XLOC_144603	XLOC_144603	0	0.016252	0.036225	0	0	0
TCONS_00363422	XLOC_145666	XLOC_145666	0	0	0.062222	0	0	0.026712
TCONS_00374214	XLOC_150460	XLOC_150460	0	0	0.075621	0	0	0
TCONS_00374217	XLOC_150463	XLOC_150463	0	0	0.10362	0	0	0
TCONS_00376030	XLOC_151443	XLOC_151443	0	0	0.089012	0	0	0
TCONS_00389210	XLOC_157373	XLOC_157373	0	0	0.023476	0	0	0
ENST00000588951	ENSG00000237491	AL669831.5	0	0.003754	0.008064	0	0	0.00567
ENST00000634986	ENSG00000232453	AC105277.1	0.016921	0.027539	0.079058	0.012087	0	0.024213
ENST00000426393	ENSG00000230798	FOXD3-AS1	0.001332	0.004134	0.042604	0.006712	0	0.029911
ENST00000635350	ENSG00000235200	LINC01702	0	0.011168	0.02294	0	0	0.013196
ENST00000488557	ENSG00000282057	AC092807.3	0.003417	0.068471	0.144139	0.011488	0.000204	0.018378
ENST00000425185	ENSG00000225446	LINC01763	0.002547	0	0.01268	0	0	0.005349
ENST00000424528	ENSG00000225206	MIR137HG	0.009042	0.052931	0.089925	0.00901	0.04427	0
ENST00000648602	ENSG00000285922	AC104453.1	0.012206	0.013259	0.039142	0	0	0
ENST00000443219	ENSG00000233154	LINC01762	0	0.016126	0.016166	0	0	0
ENST00000621316	ENSG00000278811	LINC00624	0.004673	0.007388	0.025066	0.003101	0	0
ENST00000450800	ENSG00000233540	DNM3-IT1	0.006746	0	0.051717	0	0	0.026594
ENST00000644436	ENSG00000285280	AL390957.1	0	0.006528	0.013499	0	0	0
ENST00000367356	ENSG00000203721	LINC00862	0	0.032	0.027777	0	0.003194	0
ENST00000443636	ENSG00000231648	LINC01698	0	0.011331	0.02292	0	0	0
ENST00000652109	ENSG00000238005	AL391832.2	0	0.024809	0.045378	0	0	0.026631
ENST00000613389	ENSG00000276850	AC245041.2	0.004664	0.010882	0.023993	0	0	0.013859
ENST00000450995	ENSG00000229261	AL596223.1	0	0.001892	0.002857	0	0	0
ENST00000450206	ENSG00000234311	AL451069.3	0	0.008214	0.008435	0	0	0
ENST00000499962	ENSG00000247473	CARS-AS1	3.5e-05	1.6e-05	0.006516	0.000445	0.000348	0.00385
ENST00000531538	ENSG00000255362	AP000785.2	0	0.099388	0.212653	0	0.055405	0
ENST00000606980	ENSG00000272301	AP002360.3	0.016081	0.107058	0.198542	0.066149	0.018589	0.036558
ENST00000529416	ENSG00000255129	AP000880.1	0	0	0.008587	0	0	0.007149
ENST00000619166	ENSG00000276718	AC005840.4	0.015463	0.069361	0.119213	0.020632	0.023357	0.032824
ENST00000538416	ENSG00000255958	AC115676.1	0	0.002782	0.058459	0.009748	0	0.040945
ENST00000501954	ENSG00000245482	AC046130.1	0	0.005753	0.011765	0	0	0.004512
ENST00000552998	ENSG00000257613	LINC01481	0	0	0.020378	0	0	0.012525
ENST00000547432	ENSG00000257322	AC138123.1	0	0.00577	0.011852	0	0	0
ENST00000652234	ENSG00000257545	AC079385.1	0	0.000677	0.000664	0	0	0
ENST00000612438	ENSG00000275226	LINC00547	0	0.022103	0.033254	0.021844	0.003156	0
ENST00000556988	ENSG00000258985	AL352979.2	0.013716	0.022734	0.063739	0	0	0
ENST00000558702	ENSG00000259215	AC027237.2	0	0.005461	0.006711	0	0	0
ENST00000613848	ENSG00000277582	RN7SL428P	0.006593	0.024703	0.044936	0.010584	0.013417	0.001513
ENST00000650802	ENSG00000259275	AC087477.2	0.014311	0.033424	0.060656	0	0.015217	0
ENST00000557903	ENSG00000259182	AC019254.1	0	0.111318	0.186352	0.05287	0.082246	0.041732
ENST00000570515	ENSG00000262362	AC004233.1	0.01603	0	0.037531	0	0	0.023141
ENST00000568032	ENSG00000260430	AC099518.1	0.003494	0.072622	0.075703	0.020185	0	0
ENST00000561764	ENSG00000261723	AC008870.4	0	0	0.003028	0	0	0.001893
ENST00000565904	ENSG00000261103	AC009063.3	0	0.007938	0.007262	0	0	0
ENST00000635352	ENSG00000283033	AC022596.2	0.00256	0.009452	0.013622	0	0.003409	0
ENST00000581240	ENSG00000263370	AC104564.1	0	0.00339	0.015629	0	0	0.011894
ENST00000582938	ENSG00000265394	AC104984.2	0	0.01167	0.013761	0	0.010088	0
ENST00000584157	ENSG00000263531	AC130324.1	0	0.007848	0.009762	0.003723	0	0
ENST00000577405	ENSG00000266274	RN7SL138P	0	0.053924	0.09349	0	0.03254	0
ENST00000578280	ENSG00000266088	AC004585.1	0	0.094173	0.146885	0.061878	0.010348	0.033933
ENST00000591166	ENSG00000267080	ASB16-AS1	0.049298	0.063223	0.150662	0	0.011973	0.064918
ENST00000576751	ENSG00000262079	AC007638.1	0	0.00472	0.004815	0	0	0
ENST00000580022	ENSG00000265148	TSPOAP1-AS1	0.001087	0.005206	0.01591	0	0.006551	0
ENST00000592917	ENSG00000267772	LINC01999	0	0.01288	0.024861	0	0	0.015218
ENST00000585020	ENSG00000264270	AC087749.1	0	0.027198	0.053876	0.001663	0	0.015173
ENST00000577995	ENSG00000177337	DLGAP1-AS1	0	0.017674	0.021483	0	0	0
ENST00000580267	ENSG00000266708	AP001793.1	0	0.009601	0.010846	0	0	0
ENST00000589795	ENSG00000267199	AP001029.2	0.027407	0.036919	0.106196	0.000585	0.020524	0.019332
ENST00000588469	ENSG00000267424	AC020934.1	0	0.00766	0.02093	0	0	0.020311
ENST00000596643	ENSG00000269439	AC010618.4	0	0.004433	0.007888	0	0	0.002401
ENST00000601618	ENSG00000269148	AC092301.1	0.004021	0.010891	0.022369	0.006844	0	0
ENST00000430429	ENSG00000234378	AC098828.3	0	0.011154	0.011455	0	0	0
ENST00000411862	ENSG00000229122	AGBL5-IT1	0.018015	0.020016	0.087073	0.00401	0.010627	0.034026
ENST00000442821	ENSG00000231054	AC093833.1	4.3e-05	0.028969	0.026708	0	0	0
ENST00000452840	ENSG00000233723	LINC01122	0	0.000962	0.001672	0	0	0
ENST00000452343	ENSG00000228414	LINC01185	0	0.001902	0.001935	0	0.000964	0
ENST00000630617	ENSG00000235885	LINC01828	0	0.027699	0.033947	0	0	0
ENST00000452354	ENSG00000232084	LINC01104	0	0.010826	0.010179	0	0	0
ENST00000642191	ENSG00000172965	MIR4435-2HG	0	0.032481	0.038301	0	0.02595	0
ENST00000605907	ENSG00000229056	HECW2-AS1	0.012051	0.01067	0.029548	0	0.008154	0
ENST00000415387	ENSG00000273118	AC093865.1	0	0.008647	0.011178	0	0	0
ENST00000445534	ENSG00000224132	AC112715.1	0	0.083126	0.078995	0	0	0
ENST00000637634	ENSG00000283635	AC012485.3	0	0.006865	0.00879	0	0	0
ENST00000419662	ENSG00000285230	RALY-AS1	0	0.115639	0.257046	0	0.165719	0.134637
ENST00000618285	ENSG00000285230	RALY-AS1	0	0.005752	0.009258	0	0.007201	0
ENST00000450473	ENSG00000236352	AC005220.1	0	0.044006	0.086096	0	0.040794	0.052047
ENST00000613711	ENSG00000276627	AL117372.1	0	0.00746	0.006702	0	0	0
ENST00000420877	ENSG00000234380	LINC01426	0.002576	0	0.013142	0	0	0.007421
ENST00000615847	ENSG00000183250	LINC01547	0.004788	0.034801	0.054582	0.00288	0.01273	0.001957
ENST00000410698	ENSG00000222630	RN7SKP131	0	0.06871	0.086251	0	0.044754	0
ENST00000424761	ENSG00000223695	FO393418.1	0.000344	0.000929	0.001855	4.7e-05	0.000977	0.000336
ENST00000420118	ENSG00000244491	AL021707.5	0.020068	0.24223	0.423143	0.032225	0.029049	0.005632
ENST00000524210	ENSG00000206573	THUMPD3-AS1	0	0.000142	0.000189	2.1e-05	0	0
ENST00000466431	ENSG00000254485	AC026191.1	0.023223	0.070641	0.153613	0.048904	0	0
ENST00000608408	ENSG00000249786	EAF1-AS1	0	0	0.061968	0	0	0.048878
ENST00000453717	ENSG00000230454	U73166.1	0	0.01143	0.010953	0	0	0
ENST00000631985	ENSG00000282527	AC110491.3	0	0	0.028886	0	0	0.020208
ENST00000492981	ENSG00000242659	AC108693.2	0	0.001648	0.010034	0	0	0.004218
ENST00000496491	ENSG00000240541	TM4SF1-AS1	0	0.008873	0.02181	0	0	0.01099
ENST00000445466	ENSG00000229619	MBNL1-AS1	0	0.076421	0.137791	0.043674	0	0.059677
ENST00000626852	ENSG00000242086	MUC20-OT1	0	0	0.040143	0	0	0.029013
ENST00000627718	ENSG00000242086	MUC20-OT1	0	0.014296	0.028477	0	0	0.021753
ENST00000356499	ENSG00000214559	AC019077.1	0.079664	0.178544	0.268	0.014308	0.032147	0.01487
ENST00000500526	ENSG00000246774	ZCCHC23	0	0.004208	0.00876	0	0	0.005039
ENST00000500914	ENSG00000245213	AC105285.1	0.001508	0.003136	0.015093	0.001485	0.003252	0.006486
ENST00000506629	ENSG00000249650	AC106772.1	0.019998	0.016084	0.061722	0.011118	0	0.024409
ENST00000650795	ENSG00000286193	AC025449.2	0.001386	0.0288	0.03859	0.000999	0.003795	0.019278
ENST00000510150	ENSG00000251144	AC113346.1	0	0	0.01351	0	0	0.009116
ENST00000520163	ENSG00000253979	AC109479.3	0	0	0.028921	0	0	0.023343
ENST00000449143	ENSG00000227803	AL158198.1	0.008969	0.016095	0.021458	0	0	0
ENST00000606336	ENSG00000272168	CASC15	0	0.008967	0.018433	0	0.003313	0
ENST00000511369	ENSG00000236740	AL033384.1	0	0.00399	0.006904	0	0	0
ENST00000455071	ENSG00000234155	LINC02535	9.4e-05	0.081668	0.121229	0.002992	0	0
ENST00000440578	ENSG00000237499	AL357060.1	0	0.068698	0.091195	0.029388	0	0.009591
ENST00000606831	ENSG00000233452	STXBP5-AS1	0.010204	0.053712	0.129986	0	0.046125	0.059913
ENST00000413706	ENSG00000229043	AC091729.3	0.014546	0.013053	0.046142	0	0	0
ENST00000429872	ENSG00000237181	AC147651.4	0	0.046259	0.078193	0.010008	0	0.047524
ENST00000436758	ENSG00000234336	JAZF1-AS1	0.00716	0.053395	0.05786	0	0	0
ENST00000415536	ENSG00000236453	AC003092.1	0.016237	0.092185	0.184906	0	0.014531	0
ENST00000608064	ENSG00000272760	AC093726.1	0.020175	0.276193	0.314739	0.016705	0.013042	0.027011
ENST00000638924	ENSG00000280273	AF131216.4	0.000188	0.083159	0.110131	0.000391	0.022233	0.058453
ENST00000519738	ENSG00000253161	LINC01605	0.006297	0.010344	0.041174	0.00818	0.001002	0.005112
ENST00000520575	ENSG00000254224	AP003465.1	0	0.011762	0.036707	0.006753	0	0.0272
ENST00000530350	ENSG00000255325	AC108136.1	0	0.010651	0.018579	0	0	0
ENST00000455933	ENSG00000240498	CDKN2B-AS1	0	0.155202	0.216704	0	0.015459	0.00921
ENST00000609241	ENSG00000233178	AL161457.2	0	0	0.025959	0	0	0.018745
ENST00000423719	ENSG00000235641	LINC00484	0	0.002642	0.005616	0.002528	0	0
ENST00000610187	ENSG00000273249	BX649632.1	0.007908	0	0.032481	0	0	0.013193
ENST00000435394	ENSG00000229563	LINC01204	0.024383	0.046217	0.101453	0.023193	0.00718	0.000738
ENST00000431139	ENSG00000230015	AL365184.2	0.009057	0.040806	0.038764	0	0	0
ENST00000549710	ENSG00000257515	AC011601.1	0.01114	0.01442	0.027151	0	0	0
ENST00000622757	ENSG00000278041	AL133325.3	0	0.001132	0.002326	0	0	0
ENST00000503998	ENSG00000250511	AC098798.1	0	0.0115	0.049165	0	0	0.027176
ENST00000514840	ENSG00000249664	AC027338.1	0.008801	0.016944	0.051789	0	0.009282	0.014379
ENST00000445345	ENSG00000225981	AC102953.1	0	0.016596	0.017159	0	0	0
ENST00000449903	ENSG00000223872	AC006372.1	0	0.012757	0.016958	0	0.016452	0
TCONS_00022024	ENSG00000049239	H6PD	0.015413	0.194971	0.206368	0	0	0.004756
TCONS_00008177	ENSG00000184588	PDE4B	0	0.071335	0.107731	0	0	0
TCONS_00028063	XLOC_011249	XLOC_011249	0.038482	0.053055	0.179901	0.03902	0	0.023884
TCONS_00009950	XLOC_004100	XLOC_004100	0.013172	0.010357	0.056288	0.002391	0.001172	0.044121
TCONS_00010019	XLOC_004119	XLOC_004119	0	0.046342	0.103788	0	0.052204	0
TCONS_00012035	XLOC_004980	XLOC_004980	0.01284	0.014228	0.028338	0	0	0
TCONS_00012036	XLOC_004980	XLOC_004980	0.011627	0.031338	0.073971	0.014192	0.024045	0.036413
TCONS_00012720	ENSG00000118292	C1orf54	0	0.042583	0.065624	0	0	0
TCONS_00013876	ENSG00000160789	LMNA	0	0.028603	0.040673	0.009881	0.006702	0
TCONS_00014787	XLOC_005841	XLOC_005841	0	0.037147	0.107334	0.001017	0	0.022607
TCONS_00033966	XLOC_013476	XLOC_013476	0	0.060495	0.088191	0.036711	0	0.012444
TCONS_00015610	ENSG00000240021	TEX35	0	0.042973	0.062765	0	0	0.028301
TCONS_00047407	XLOC_019825	XLOC_019825	0.021475	0.033324	0.082728	0.009296	0.014412	0
TCONS_00039494	XLOC_016279	XLOC_016279	0	0.282275	0.37069	0.118924	0.219058	0
TCONS_00049388	XLOC_020794	XLOC_020794	0.04379	0.030817	0.095587	0.011066	0.016937	0.026008
TCONS_00041836	XLOC_017308	XLOC_017308	0	0.014397	0.046005	0	0.011772	0
TCONS_00053882	ENSG00000165868	HSPA12A	0.012328	0.022795	0.086226	0	0	0.017123
TCONS_00066683	XLOC_027415	XLOC_027415	0	0.004336	0.009551	0	0	0.005123
TCONS_00068023	ENSG00000133816	MICAL2	0.022991	0.048861	0.177689	0	0.048591	0
TCONS_00060111	XLOC_025199	XLOC_025199	0	0.043163	0.106095	0	0.012599	0
TCONS_00074407	XLOC_030250	XLOC_030250	0	0.026248	0.040434	0	0	0
TCONS_00062823	ENSG00000165490	DDIAS	0.006088	0.01935	0.054355	0	0.016269	0
TCONS_00074964	XLOC_030542	XLOC_030542	0.010165	0.028441	0.093111	0.026154	0.009598	0.0257
TCONS_00075639	ENSG00000137691	CFAP300	0	0.02584	0.026538	0	0	0
TCONS_00076481	ENSG00000180425	C11orf71	0.051201	0.193967	0.332493	0.029449	0.040867	0.021021
TCONS_00076577	ENSG00000160584	SIK3	0	0	0.024527	0	0	0.016284
TCONS_00078462	XLOC_031963	XLOC_031963	0.023901	0.047714	0.090372	0.022956	0.014014	0.01009
TCONS_00081360	XLOC_033121	XLOC_033121	0	0.03543	0.03691	0	0	0.012183
TCONS_00081313	ENSG00000179715	PCED1B	0.022591	0.108821	0.137265	9.2e-05	0.026877	0.006159
TCONS_00082276	ENSG00000170442	KRT86	0.046322	0	0.150386	0	0	0.070596
TCONS_00086554	ENSG00000139437	TCHP	0	0.005946	0.008978	0	0	0
TCONS_00107395	ENSG00000139797	RNF113B	0.057932	0.052755	0.189181	0	0	0.088873
TCONS_00115926	XLOC_047127	XLOC_047127	0	0.015432	0.020988	0	0	0
TCONS_00127224	XLOC_051618	XLOC_051618	0	0.063973	0.062971	0	0	0
TCONS_00127528	ENSG00000196391	ZNF774	0.004734	0.042368	0.064146	0	0	0.040303
TCONS_00128189	XLOC_051972	XLOC_051972	0	0.038969	0.081125	0	0	0.042379
TCONS_00128244	ENSG00000182854	OR4F15	0	0.114287	0.144893	0	0	0
TCONS_00144111	ENSG00000076344	RGS11	0	0.00737	0.007569	0	0	0
TCONS_00145836	ENSG00000183454	GRIN2A	0.019454	0.069024	0.168721	0.02188	0.013973	0.019941
TCONS_00137541	XLOC_055206	XLOC_055206	0	0.014182	0.046977	0.015412	0	0
TCONS_00140245	ENSG00000177200	CHD9	0	0.003455	0.027472	0.00527	0	0.018157
TCONS_00153286	ENSG00000072818	ACAP1	0	0.059205	0.059245	0	0	0
TCONS_00165914	ENSG00000260458	KCNJ18	0	0.079536	0.099748	0	0	0
TCONS_00169999	ENSG00000108846	ABCC3	0	0.055277	0.063297	0.016435	0	0
TCONS_00159607	ENSG00000167419	LPO	0	0	0.07935	0	0	0.060297
TCONS_00170427	ENSG00000266086	AC015813.2	0.001081	0	0.064376	0.000137	0.000451	0.041478
TCONS_00159825	ENSG00000267318	AC005702.1	0	0.023586	0.04551	0	0	0
TCONS_00174458	ENSG00000101680	LAMA1	0	0.03871	0.06755	0	0	0
TCONS_00177566	XLOC_067963	XLOC_067963	0	0.013775	0.098123	0	0	0.097765
TCONS_00198934	ENSG00000245680	ZNF585B	0	0.085593	0.082887	0	0	0
TCONS_00200807	ENSG00000010310	GIPR	0	0.022161	0.081771	0	0	0.047038
TCONS_00201104	ENSG00000105327	BBC3	0	0	0.002631	0	0	0.002024
TCONS_00220410	XLOC_083213	XLOC_083213	0	0.051022	0.080614	0	0	0
TCONS_00205126	XLOC_076839	XLOC_076839	0	0.013816	0.048841	0	0.020748	0.027074
TCONS_00221225	XLOC_083519	XLOC_083519	0	0.02703	0.025483	0	0	0
TCONS_00211253	ENSG00000144134	RABL2A	0.000205	0.000658	0.013422	0.000127	0.000573	0.00808
TCONS_00227784	XLOC_086335	XLOC_086335	0	0.009332	0.009901	0	0	0
TCONS_00228492	XLOC_086680	XLOC_086680	0.020827	0.044584	0.100406	0.009104	0.018709	0
TCONS_00229216	ENSG00000153250	RBMS1	0.021971	0.011235	0.168823	0.010069	0	0.098866
TCONS_00215020	ENSG00000144366	GULP1	0.000488	0.535944	0.468477	0.010954	0.019224	0.005498
TCONS_00230862	XLOC_087757	XLOC_087757	0.018856	0.053309	0.148762	0	0	0.044559
TCONS_00232099	ENSG00000144401	METTL21A	0.000504	0.086013	0.126188	0	0.000462	0
TCONS_00217609	XLOC_082179	XLOC_082179	0.012848	0.022488	0.063763	0	0.013518	0
TCONS_00217603	ENSG00000135905	DOCK10	0.014431	0.069912	0.131463	0	0	0
TCONS_00237292	XLOC_090461	XLOC_090461	0	0.022528	0.073288	0	0.019977	0.019429
TCONS_00238131	ENSG00000101096	NFATC2	0.001466	0.011084	0.015597	0	0.005699	0
TCONS_00238260	XLOC_090856	XLOC_090856	0	0	0.060398	0	0	0.046926
TCONS_00248861	ENSG00000157578	LCA5L	0	0.053168	0.053872	0	0.025768	0
TCONS_00246843	ENSG00000183570	PCBP3	0.007309	0	0.015854	0	0	0.009241
TCONS_00250617	ENSG00000169635	HIC2	0.018183	0.038232	0.152376	0	0.024518	0.041087
TCONS_00254040	ENSG00000205593	DENND6B	0.018416	0.039286	0.151533	0.024606	0	0.028268
TCONS_00258446	ENSG00000175928	LRRN1	0.000113	0.000488	0.001686	0.000225	0.000199	0
TCONS_00270918	ENSG00000144455	SUMF1	0.108839	0.181675	0.997558	0	0.293899	0.554098
TCONS_00271840	XLOC_104355	XLOC_104355	0	0.039155	0.07392	0	0	0.032656
TCONS_00259675	XLOC_099519	XLOC_099519	0	0.019701	0.036755	0.007002	0	0.006905
TCONS_00272669	ENSG00000144681	STAC	0.015572	0.081234	0.181523	0.046259	0.019959	0.034488
TCONS_00279201	ENSG00000163785	RYK	0.005685	0.026995	0.05968	0.01509	0.007571	0.025962
TCONS_00279485	ENSG00000181322	NME9	0.015864	0.026016	0.099332	0.014558	0.021488	0.055687
TCONS_00280481	XLOC_107944	XLOC_107944	0	0.044884	0.124652	0	0	0.045208
TCONS_00292758	XLOC_113371	XLOC_113371	0	0.042502	0.053181	0	0.027191	0
TCONS_00286841	ENSG00000080493	SLC4A4	0.036658	0.243478	0.425711	0	0.135712	0.064282
TCONS_00295369	ENSG00000156140	ADAMTS3	0.017	0.020626	0.070799	0.009702	0.015839	0.026661
TCONS_00286980	ENSG00000163738	MTHFD2L	9.4e-05	0.058357	0.127142	0.018477	0.014434	0.054903
TCONS_00296527	XLOC_115201	XLOC_115201	0	0.13518	0.173681	0	0	0.019897
TCONS_00289611	ENSG00000153130	SCOC	0.101976	0.969578	0.875667	0	0	0
TCONS_00289604	ENSG00000153130	SCOC	0	1.53163	1.43455	0	0	0
TCONS_00299194	XLOC_116352	XLOC_116352	0	0.002797	0.026709	0	0.001891	0.01287
TCONS_00299382	ENSG00000145414	NAF1	0.006081	0.101729	0.095631	0	0	0
TCONS_00299640	XLOC_116605	XLOC_116605	0.002918	0.036424	0.047218	0	0	0
TCONS_00312239	XLOC_122392	XLOC_122392	0	0.011777	0.06009	0	0.013051	0.01076
TCONS_00314644	XLOC_123716	XLOC_123716	0	0.084337	0.195062	0	0	0.044672
TCONS_00303679	ENSG00000069020	MAST4	0	0.060078	0.096074	0	0.003865	0.012079
TCONS_00316778	XLOC_124749	XLOC_124749	0	0.021481	0.040498	0	0.011871	0
TCONS_00307248	ENSG00000158985	CDC42SE2	0	0.044251	0.062285	0	0	0
TCONS_00307440	XLOC_120501	XLOC_120501	0	0.018864	0.046135	0	0	0.047464
TCONS_00307638	ENSG00000255833	TIFAB	0	0.04693	0.094865	0	0	0
TCONS_00319361	ENSG00000187372	PCDHB13	0.013115	0.013657	0.07419	0.018283	0.004423	0.054626
TCONS_00319602	XLOC_126098	XLOC_126098	0	0.038937	0.110262	0	0	0.018925
TCONS_00320510	ENSG00000285868	AC008676.3	0.001171	0.019152	0.036719	0	0	0
TCONS_00338201	XLOC_134911	XLOC_134911	0	0	0.030849	0	0	0.019717
TCONS_00329683	ENSG00000183137	CEP57L1	0	0.00802	0.081453	0	0	0.057027
TCONS_00340288	XLOC_136063	XLOC_136063	0	0.025554	0.025287	0	0.00016	0
TCONS_00329998	XLOC_130992	XLOC_130992	0	0.031253	0.059357	0.029378	0	0.013125
TCONS_00331219	ENSG00000197442	MAP3K5	0.007522	0.059195	0.101003	0	0	0
TCONS_00342169	XLOC_136944	XLOC_136944	0	0.028709	0.051024	0.003593	0.007348	0.018456
TCONS_00342319	XLOC_136999	XLOC_136999	0	0.050138	0.059747	0	0	0.034387
TCONS_00344505	ENSG00000106392	C1GALT1	0	0.018628	0.113286	0	0.02122	0.027715
TCONS_00346683	XLOC_138845	XLOC_138845	0	0.133279	0.119818	0	0	0
TCONS_00350488	ENSG00000128536	CDHR3	0	0.002641	0.0036	0	0	0
TCONS_00360878	ENSG00000184903	IMMP2L	0	0	0.003814	0	0	0.002611
TCONS_00352090	ENSG00000164707	SLC13A4	0.025145	0.025522	0.073636	0	0	0.038104
TCONS_00374592	ENSG00000169139	UBE2V2	0	0.025586	0.033882	0	0	0
TCONS_00370146	XLOC_148771	XLOC_148771	0	0.028745	0.071481	0	0.02705	0
TCONS_00370186	ENSG00000178764	ZHX2	0	0.037109	0.040546	0	0	0
TCONS_00381544	XLOC_153867	XLOC_153867	0	0.044503	0.065035	0	0	0
TCONS_00405233	XLOC_165208	XLOC_165208	0	0.044196	0.050649	0	0	0
TCONS_00407521	ENSG00000079482	OPHN1	0	0.073456	0.103902	0.039964	0.014371	0
TCONS_00409053	ENSG00000269743	SLC25A53	0	0.054132	0.072731	0	0	0
TCONS_00000932	XLOC_000676	XLOC_000676	0	0.016674	0.019696	0	0	0
TCONS_00001041	XLOC_000772	XLOC_000772	0	0.021285	0.019318	0	0	0
TCONS_00001057	XLOC_000780	XLOC_000780	0	0.027713	0.054567	0.003694	0.009281	0
TCONS_00020955	XLOC_008616	XLOC_008616	0.009519	0.043541	0.092756	0.033534	0	0.040017
TCONS_00028062	XLOC_011248	XLOC_011248	0	0.022009	0.023493	0	0	0
TCONS_00100564	XLOC_040364	XLOC_040364	0	0.014858	0.030518	0	0	0
TCONS_00102152	XLOC_041089	XLOC_041089	0	0.029809	0.046282	0	0	0
TCONS_00120576	XLOC_049088	XLOC_049088	0.03631	0.114561	0.144344	0.016064	0.032237	0
TCONS_00124867	XLOC_050838	XLOC_050838	0	0.01235	0.015737	0	0	0
TCONS_00303352	XLOC_118605	XLOC_118605	0	0.045717	0.093902	0	0	0
TCONS_00363483	XLOC_145689	XLOC_145689	0	0	0.045422	0	0	0.033294
TCONS_00374813	XLOC_150809	XLOC_150809	0	0.027015	0.034354	0	0	0
TCONS_00404979	XLOC_165087	XLOC_165087	0	0.049668	0.071507	0	0.005874	0
ENST00000568143	ENSG00000261025	AL445471.2	0	0	0.006996	0.004281	0	0.001865
ENST00000610049	ENSG00000273221	AL355816.2	0.01288	0.018566	0.236719	0.07006	0.015022	0.134803
ENST00000429352	ENSG00000236427	AL589986.2	0	0	0.021524	0.022588	0	0
ENST00000608147	ENSG00000273026	AL358472.3	0.020301	0.030594	0.065192	0.021142	0.013345	0.001195
ENST00000567904	ENSG00000260360	AL353708.1	0.001567	0.004732	0.015035	0.005884	0.000883	0.004029
ENST00000568695	ENSG00000260088	AL445483.1	0	0	0.045337	0.028417	0	0
ENST00000420762	ENSG00000228536	LYPLAL1-AS1	0	0.16602	0.416678	0.18816	0.017412	0
ENST00000443836	ENSG00000228208	C1orf143	0.069048	0.027665	0.793671	0.769035	0.012819	0.025083
ENST00000646955	ENSG00000285177	AL357556.4	0.019803	0.001375	0.045125	0.035114	0	0
ENST00000620896	ENSG00000274008	RF00017	0	0.002968	0.036772	0.018303	0	0
ENST00000534483	ENSG00000255328	AC136475.5	0	0	0.019206	0.012645	0	0.000924
ENST00000527799	ENSG00000255158	AC131934.1	0.00864	0	0.027328	0.022857	0	0
ENST00000531559	ENSG00000254486	LINC02547	0	0.002515	0.007741	0.006322	0	0.002972
ENST00000410230	ENSG00000222162	RN7SKP151	0	0	0.081936	0.0567	0	0
ENST00000530690	ENSG00000246889	AP000487.1	0.008414	0.011076	0.096203	0.031443	0.00483	0.044789
ENST00000534438	ENSG00000254873	AP001267.1	0.042183	0	0.16254	0.058615	0	0.047761
ENST00000618726	ENSG00000274797	AC008121.3	0	0	0.03572	0.032443	0	0
ENST00000551257	ENSG00000258303	AC012464.2	0.03392	0	0.107232	0	0	0.03786
ENST00000535109	ENSG00000255692	AC002563.1	0.010062	0	0.027281	0.024881	0	0
ENST00000439299	ENSG00000236242	MYO16-AS1	0	0	0.04449	0.024243	0	0
ENST00000458403	ENSG00000224821	COL4A2-AS2	0	0	0.005678	0.004411	0	0
ENST00000556301	ENSG00000259038	AL121820.2	0.011202	0.003181	0.066946	0.018741	0	0.029393
ENST00000564401	ENSG00000259941	AC084782.1	0	0.002623	0.015484	0.014594	0.00386	0.001994
ENST00000574245	ENSG00000262899	AC004232.2	0.004868	0	0.010346	0.005015	0	0.004151
ENST00000582502	ENSG00000264540	RN7SL405P	0	0	0.015178	0.010735	0	0
ENST00000464382	ENSG00000239552	HOXB-AS2	0	0.009847	0.020225	0.012376	0	0
ENST00000624980	ENSG00000279066	HEXD-IT1	0.008533	0.004589	0.021257	0.005768	0	0.008676
ENST00000591469	ENSG00000267374	AC016205.1	0.009935	0.007598	0.109182	0.020996	0.015856	0.03445
ENST00000585827	ENSG00000267575	AC006504.5	0	0.044537	0.100455	0.05212	0	0
ENST00000635346	ENSG00000282943	AC004784.1	0.089117	0.037415	0.207702	0.064952	0.030506	0.054784
ENST00000599775	ENSG00000267927	AC010320.1	0	0	0.014636	0.010132	0	0
ENST00000547349	ENSG00000257135	ODC1-DT	0	0	0.049934	0.031761	0.006281	0
ENST00000412749	ENSG00000234072	AC074117.1	0.022565	0.01079	0.045507	0.010671	0.007241	0.003575
ENST00000417213	ENSG00000229160	AC009229.2	0.007707	0	0.018549	0.011917	0	0
ENST00000607950	ENSG00000272814	AC093732.2	0.006126	0.006241	0.042656	0.031713	0.008573	0.011515
ENST00000618066	ENSG00000277701	AC159540.2	0	0	0.041133	0.024779	0	0
ENST00000620051	ENSG00000230606	AC092683.1	4.6e-05	2.6e-05	0.017454	0.012845	0	0
ENST00000467398	ENSG00000222000	AC092675.1	0.013389	0.029288	0.0838	0.031157	0.02025	0
ENST00000439362	ENSG00000172965	MIR4435-2HG	0.128837	0	0.442734	0.408061	0	0
ENST00000446781	ENSG00000231079	AC105402.3	0	0	0.003297	0.002017	0	0
ENST00000437897	ENSG00000227769	AC072062.1	0	0	0.006111	0.004593	0	0
ENST00000601746	ENSG00000236540	AC006547.1	0	0	0.002343	0.002474	0	0
ENST00000608354	ENSG00000268812	AC004264.1	0	0.016436	0.048899	0.03169	0.013089	0.001018
ENST00000450746	ENSG00000227260	LINC01985	0.031206	0	0.09937	0.058816	0.046815	0
ENST00000609225	ENSG00000273493	AC098479.1	0	0	0.024045	0.018334	0	0
ENST00000606841	ENSG00000272411	AC116312.1	0	0.021552	0.054881	0.057283	0	0
ENST00000565046	ENSG00000261839	AL358933.1	0.002434	0.00411	0.030759	0.016225	0.000944	0.013838
ENST00000602550	ENSG00000231074	HCG18	0.023099	0	0.056264	0.038658	0	0
ENST00000419679	ENSG00000235663	SAPCD1-AS1	0	0	0.083176	0.01441	0.009007	0.037347
ENST00000441363	ENSG00000229852	AC019205.1	0.017169	0	0.048937	0.011583	0	0
ENST00000457833	ENSG00000233085	BX322234.2	0	0.001512	0.016889	0.00579	0.002347	0
ENST00000642963	ENSG00000285106	AC016831.7	0	0	0.017614	0.011276	0	0
ENST00000515608	ENSG00000249898	MCPH1-AS1	0.005395	0	0.01592	0	0.000326	0.004841
ENST00000521055	ENSG00000253184	AC011586.1	0	0	0.018395	0.019138	0	0
ENST00000521802	ENSG00000253408	AC083973.1	0	0	0.049426	0.041134	0	0
ENST00000518129	ENSG00000253171	AC037450.1	0	0	0.025411	0.016163	0	0
ENST00000518494	ENSG00000253500	AF121898.1	0	0.046407	0.09926	0.064487	0	0.022763
ENST00000522856	ENSG00000247081	BAALC-AS1	0.003413	0.005207	0.023344	0.010824	0	0.001048
ENST00000520037	ENSG00000253754	AC087620.1	0	0	0.009049	0.006629	0	0
ENST00000617087	ENSG00000249859	PVT1	0.000713	0.675653	1.27013	1.00162	0.033478	0.00026
ENST00000613916	ENSG00000249859	PVT1	0.002494	0.055297	0.58569	0.49908	1e-06	0.002242
ENST00000525461	ENSG00000254578	AC084125.1	0.000764	0.002528	0.018385	0.004335	0.003313	0.004274
ENST00000609131	ENSG00000273061	CDC37L1-DT	0	0	1.10931	0.359153	0	0.630454
ENST00000609749	ENSG00000234665	AL512625.3	0.005396	0	0.029895	0.019163	0	0.000687
ENST00000412934	ENSG00000230185	C9orf147	0	0.006354	0.019032	0.015365	0.007771	0
ENST00000411790	ENSG00000237548	TTLL11-IT1	0.03298	0.019369	0.203343	0.073762	0.009975	0.043935
ENST00000438380	ENSG00000236643	AL354928.1	0	0	0.019649	0.015353	0	0
ENST00000425991	ENSG00000225032	AL162586.1	0	0	0.185555	0.053654	0	0.080167
ENST00000371417	ENSG00000203993	ARRDC1-AS1	0.09185	0.086619	2.8383	2.45892	0.047972	0.129201
ENST00000609127	ENSG00000229563	LINC01204	0.110335	0	0.293703	0.112323	0.023094	0.025714
ENST00000652331	ENSG00000230590	FTX	0.034081	0.043165	0.16844	0.099206	0	0.053578
ENST00000561926	ENSG00000259776	AC093426.1	0	0.00268	0.008542	0.006946	0.003485	0.001011
ENST00000501695	ENSG00000247199	AC091948.1	0	0	0.007957	0.004642	0	0
TCONS_00005459	ENSG00000126070	AGO3	0.185233	0	0.329305	0.152575	0.144457	0.003781
TCONS_00008094	ENSG00000185483	ROR1	0.006477	0.006662	0.037706	0.025021	0.002718	0
TCONS_00008201	XLOC_003295	XLOC_003295	0	0.057251	0.136474	0.069956	0.059526	0.045096
TCONS_00008938	XLOC_003610	XLOC_003610	0	0.007644	0.031983	0.014296	0	0.023012
TCONS_00013772	ENSG00000132676	DAP3	0.000232	0.013687	0.047183	0.014601	0.014452	0.015524
TCONS_00033353	ENSG00000163565	IFI16	0.016015	0	0.072908	0.044421	0	0
TCONS_00049773	ENSG00000128805	ARHGAP22	0.174542	0.092015	0.745144	0.461672	0.106796	0.033987
TCONS_00046896	ENSG00000132334	PTPRE	0.051221	0.063616	0.187279	0.085805	0.007309	0.051562
TCONS_00069031	XLOC_028367	XLOC_028367	0.056888	0.043745	0.152538	0.059064	0.014394	0.008927
TCONS_00057382	ENSG00000169519	METTL15	0.003415	0.006579	0.082337	0.072895	0.000444	0.004658
TCONS_00057381	ENSG00000169519	METTL15	0.048987	0.007754	0.155736	0.075126	0.040621	0
TCONS_00058230	ENSG00000019485	PRDM11	0	0.005594	0.025627	0.014158	0.007652	0
TCONS_00074563	XLOC_030382	XLOC_030382	0	0	0.048897	0.040884	0	0
TCONS_00075636	ENSG00000187151	ANGPTL5	0	0.024442	0.093577	0.07089	0	0.017401
TCONS_00064213	ENSG00000110723	EXPH5	0.005043	0.000385	0.032668	0.011728	0.000469	0.011588
TCONS_00091698	XLOC_036830	XLOC_036830	0	0.014187	0.080898	0.019925	0.014716	0
TCONS_00118842	XLOC_048385	XLOC_048385	0	0.013972	0.04584	0.02621	0.017651	0
TCONS_00111932	ENSG00000197555	SIPA1L1	0.017601	0.013029	0.079321	0.060543	0.011499	0.019564
TCONS_00136370	ENSG00000059122	FLYWCH1	0.019755	0	0.121317	0.058873	0.046379	0.020542
TCONS_00146345	ENSG00000133392	MYH11	0.002364	0	0.076497	0.038256	0.002492	0.002822
TCONS_00140257	ENSG00000177200	CHD9	0	0	0.074303	0.062799	0	0.004101
TCONS_00170428	ENSG00000266086	AC015813.2	0.030908	0	0.069649	0.000717	0.001732	0.03279
TCONS_00171278	XLOC_065587	XLOC_065587	0	0.0558	0.093563	0.061746	0.035323	0
TCONS_00172013	ENSG00000187959	CPSF4L	0.041341	0.026841	0.142436	0.037542	0.017019	0.058006
TCONS_00179299	XLOC_068731	XLOC_068731	0	0.051697	0.12786	0.056986	0.029215	0
TCONS_00196337	ENSG00000132002	DNAJB1	0	0.182602	1.06197	0.382116	0.246411	0.640241
TCONS_00203446	ENSG00000268163	AC004076.1	0	0.023297	0.054566	0.038916	0	0.020853
TCONS_00203563	ENSG00000204514	ZNF814	0.014307	0.018826	0.111297	0.036466	0.00968	0.065943
TCONS_00226341	XLOC_085591	XLOC_085591	0.004077	0.02602	0.108809	0.062708	0.005709	0.024404
TCONS_00232560	ENSG00000079308	TNS1	0.056509	0.08851	0.236837	0.166786	0.052806	0
TCONS_00238771	ENSG00000179242	CDH4	0.045371	0.019686	0.148853	0.016595	0.002491	0.002739
TCONS_00248277	ENSG00000159128	IFNGR2	0.101938	0.036458	0.218699	0.115944	0	0
TCONS_00251196	ENSG00000167037	SGSM1	0	0	0.051902	0.051772	0	0
TCONS_00257692	XLOC_098901	XLOC_098901	0.001463	0	0.003219	0	0	0.00153
TCONS_00259261	XLOC_099342	XLOC_099342	0	0	0.061	0.028111	0	0.026369
TCONS_00260305	ENSG00000153551	CMTM7	0	0	0.06853	0.044951	0	0.005954
TCONS_00260399	ENSG00000153558	FBXL2	0.003358	0.005782	0.042583	0.026665	0.005366	0.005028
TCONS_00268018	XLOC_102927	XLOC_102927	0	0	0.039242	0.031084	0	0
TCONS_00281755	XLOC_108482	XLOC_108482	0	0	0.111605	0.064156	0.001519	0.012733
TCONS_00297646	XLOC_115638	XLOC_115638	0.122026	0.214233	0.770982	0.491636	0.157412	0.087284
TCONS_00299248	ENSG00000145431	PDGFC	0.040478	0.097752	0.683141	0.094337	0.061744	0.15919
TCONS_00290728	ENSG00000145416	2022-03-01	0.000807	0.017826	0.090792	0.068468	0.000116	0.002364
TCONS_00300615	ENSG00000164366	CCDC127	0	0.048983	0.121766	0.053553	0.030058	0.054171
TCONS_00312419	ENSG00000145555	MYO10	0	0	0.168864	0.087644	0.080962	0
TCONS_00303457	XLOC_118657	XLOC_118657	0	0	0.074754	0.04306	0	0
TCONS_00304831	XLOC_119181	XLOC_119181	0	0	0.089827	0.043903	0.028551	0
TCONS_00304924	ENSG00000152348	ATG10	0	0	0.047555	0.030051	0	0.000489
TCONS_00317211	ENSG00000186952	TMEM232	0	0.010672	0.055503	0.033848	0	0
TCONS_00306730	ENSG00000184838	PRR16	0.126986	0.06343	0.245279	0.066987	0	0.049465
TCONS_00306727	ENSG00000184838	PRR16	0.01128	0.069824	0.177142	0.120283	0	0.019866
TCONS_00310156	ENSG00000134516	DOCK2	0.070746	0.047969	0.170846	0.064377	0.029737	0.037203
TCONS_00335676	XLOC_133932	XLOC_133932	0.021173	0	0.071274	0.04337	0.000159	0
TCONS_00337856	XLOC_134742	XLOC_134742	0	0.00393	0.018665	0.008176	0.004669	0.004361
TCONS_00331222	ENSG00000197442	MAP3K5	0	0	0.098164	0.062419	0	0
TCONS_00342307	XLOC_136999	XLOC_136999	0.07096	0	0.263142	0.117036	0	0
TCONS_00331723	XLOC_131961	XLOC_131961	0.007576	0	0.08291	0.05906	0.01009	0
TCONS_00355378	XLOC_142421	XLOC_142421	0.014107	0	0.056333	0.025885	0	0
TCONS_00346713	XLOC_138874	XLOC_138874	0	0	0.022369	0.013006	0	0
TCONS_00359402	ENSG00000127922	SEM1	0.001223	0.019704	0.039762	0.030728	0	0
TCONS_00373911	XLOC_150348	XLOC_150348	0.024065	0	0.060261	0.027037	0	0
TCONS_00375940	ENSG00000091656	ZFHX4	0.012526	0	0.06543	0.026611	0.020157	0
TCONS_00370151	XLOC_148777	XLOC_148777	0.07725	0.055178	0.238912	0.043198	0.033207	0.02558
TCONS_00380972	ENSG00000197646	PDCD1LG2	0.178669	0.226282	1.35105	0.481104	0.188482	0.146193
TCONS_00382110	XLOC_154280	XLOC_154280	0.004149	0	0.069808	0.021358	0	0.040611
TCONS_00392683	XLOC_159294	XLOC_159294	0.020382	0.022748	0.079072	0.045684	0	0
TCONS_00392982	ENSG00000130045	NXNL2	0	0	0.085504	0.043493	0	0.030413
TCONS_00397448	ENSG00000185291	IL3RA	0	0.011826	0.052486	0.036999	0.018023	0.005832
TCONS_00406264	ENSG00000251192	ZNF674	0	0.021116	0.092586	0.067997	0.031859	0
TCONS_00000216	XLOC_000146	XLOC_000146	0	0	0.049939	0.052572	0	0
TCONS_00000167	XLOC_000112	XLOC_000112	0	0.084326	0.270861	0.308438	0	0
TCONS_00000796	XLOC_000608	XLOC_000608	0	0.075608	5.77882	5.25999	0	0
TCONS_00023692	XLOC_009572	XLOC_009572	0	0	0.033157	0.021928	0	0
TCONS_00038543	XLOC_015764	XLOC_015764	0	0.004751	0.06311	0.027006	0	0.021782
TCONS_00119525	XLOC_048620	XLOC_048620	0.021866	0	0.093657	0.052342	0.021907	0
TCONS_00159280	XLOC_061802	XLOC_061802	0	0	0.042752	0.037336	0	0
TCONS_00276104	XLOC_105794	XLOC_105794	0.014869	0	0.036825	0.020696	0	0
TCONS_00264669	XLOC_101398	XLOC_101398	0	0	0.030088	0.018411	0	0
TCONS_00316037	XLOC_124422	XLOC_124422	0	0.028841	0.044429	0.033892	0	0

## Sheet: lncRNA_No UV_cluster 4
transcript_id	gene_id	gene_name	C_0	C_3	C_6	C_9	C_12	C_24
ENST00000422528	ENSG00000229905	AL669831.2	0	0	0	0.002867	0	0
ENST00000607222	ENSG00000272106	AL691432.2	0.006731	0.004809	7.6e-05	0.028757	0.005937	0.000373
ENST00000644246	ENSG00000272449	AL139246.5	0	0	0.005323	0.014628	0.003185	0
ENST00000444276	ENSG00000232912	RERE-AS1	0	0	0	0.016204	0	0
ENST00000632503	ENSG00000228526	MIR34AHG	0.004422	0	0	0.020749	0	0
ENST00000461850	ENSG00000243267	RN7SL614P	0	0	0.028484	0.071086	0	0.01264
ENST00000649268	ENSG00000285646	AL021155.2	0	0	0.003692	0.03958	0	0.013339
ENST00000449034	ENSG00000231105	AL031728.1	0.003168	0	0.003436	0.012655	0	0
ENST00000439239	ENSG00000225315	AL591178.1	0	0	0	0.010723	0	0
ENST00000605846	ENSG00000271398	AL353622.2	0.003399	0.008484	0	0.128196	0.012592	0
ENST00000634587	ENSG00000223382	LINC01778	0.001995	0	0	0.041361	0	0.011236
ENST00000591929	ENSG00000235790	AC114488.2	0	0.00407	0	0.009982	0	0
ENST00000587696	ENSG00000225313	AL513327.1	0	0	0	0.014605	0.007328	0
ENST00000428791	ENSG00000225721	AL592166.1	0	0	1.27988	2.8888	0	0
ENST00000568425	ENSG00000261664	TTC39A-AS1	0	0	0	0.037292	0	0
ENST00000641502	ENSG00000260971	AC119674.1	0	0	0	0.000832	0	0
ENST00000641876	ENSG00000260971	AC119674.1	0	0	0	0.075603	0	0
ENST00000636386	ENSG00000283445	AL136985.3	0	0	0	0.007698	0	0
ENST00000438559	ENSG00000237928	NFIA-AS2	0	0	0	0.008065	0.003885	0
ENST00000438195	ENSG00000237352	LINC01358	0.004603	0.003145	0.003412	0.113466	0.045594	0
ENST00000631169	ENSG00000237352	LINC01358	0	0	0	0.013824	0	0
ENST00000625548	ENSG00000237352	LINC01358	0	0	0.005472	0.025356	0	0
ENST00000425754	ENSG00000237919	AL158840.1	0	0	0	0.062001	0	0
ENST00000413943	ENSG00000226088	AL158839.1	0	0	0.014861	0.049711	0	0
ENST00000472448	ENSG00000282057	AC092807.3	0	0	0	0.000742	0	0
ENST00000451611	ENSG00000230427	AC095033.1	0	0	0	0.009382	0	0.001405
ENST00000630798	ENSG00000232878	DPYD-AS1	0	0	0	0.028888	0.014494	0
ENST00000449473	ENSG00000233184	AC093157.1	0	0	0	0.058251	0	0
ENST00000419144	ENSG00000230921	HAO2-IT1	0	0	0	0.025141	0	0
ENST00000440150	ENSG00000231365	WARS2-AS1	0	0	0	0.059203	0	0.028854
ENST00000615424	ENSG00000226067	LINC00623	0	0	0	0.002127	0	0
ENST00000415338	ENSG00000234571	AC239798.2	0	0	0	0.002944	0	0
ENST00000619720	ENSG00000233396	LINC01719	0	0	0	0.018453	0	0
ENST00000452867	ENSG00000224687	RASAL2-AS1	0	0	0	0.046903	0	0
ENST00000642657	ENSG00000236069	AL136987.1	0	0	0	0.013679	0	0
ENST00000442318	ENSG00000224717	AC098936.1	0	0	0	0.003601	0	0
ENST00000428399	ENSG00000236889	AC244035.2	0	0	0	0.041496	0	0
ENST00000637970	ENSG00000203709	MIR29B2CHG	0	0	0	0.069773	0	0
ENST00000412918	ENSG00000228382	ITPKB-IT1	0	0	0	0.023806	0	0
ENST00000424451	ENSG00000228625	AL451047.1	0	0	0	0.009394	0	0
ENST00000439341	ENSG00000223393	AL118511.1	0.000164	0.001328	0.001058	0.009745	0.001473	0
ENST00000612827	ENSG00000274121	RF02102	0	0	0	0.045911	0.020645	0
ENST00000416221	ENSG00000233461	AL445524.1	0.030629	0.041597	0.012501	0.915857	0.454941	0.004589
ENST00000456078	ENSG00000231272	AL122008.1	0	0	0	0.023136	0	0
ENST00000400946	ENSG00000215808	LINC01139	0.016554	0.000197	0.063272	0.236078	0.036814	0.026004
ENST00000439562	ENSG00000227230	AL606534.1	0	0	0.045469	0.073679	0	0
ENST00000470784	ENSG00000239822	RN7SL754P	0	0	0	0.019788	0	0
ENST00000442008	ENSG00000256462	AL732437.1	0	0	0	0.017576	0	0
ENST00000574842	ENSG00000262412	AL160291.1	0	0	0	0.007644	0	0
ENST00000429940	ENSG00000185904	LINC00839	0.09249	0.473236	0.144947	2.53911	0.078003	0.146287
ENST00000453284	ENSG00000226245	ZNF32-AS1	0	0	0	0.028654	0	0
ENST00000424615	ENSG00000229227	AL356056.1	0	0	0	0.001953	0	0
ENST00000437213	ENSG00000225303	AL117341.1	0	0	0	0.015475	0	0
ENST00000441001	ENSG00000233643	LINC02625	0	0	0	0.03566	0	0
ENST00000620859	ENSG00000228065	LINC01515	0	0	0	0.08803	0	0.013297
ENST00000593568	ENSG00000228065	LINC01515	0	0	0	0.037812	0	0
ENST00000431638	ENSG00000226163	AL513185.1	0	0	0	0.027996	0	0
ENST00000434147	ENSG00000224195	AC022400.1	0	0	0	0.006737	0	0
ENST00000446730	ENSG00000229990	AC022400.2	0	0	0	0.010264	0.001777	0.001665
ENST00000600782	ENSG00000236467	KCNMA1-AS1	0	0	0	0.023835	0	0
ENST00000600376	ENSG00000225484	NUTM2B-AS1	0.000334	0	0	0.090063	0.005936	0.001753
ENST00000449882	ENSG00000235100	AL157400.3	0	0	0	0.003484	0	0
ENST00000577919	ENSG00000264313	RN7SL644P	0.000507	0	0.00066	0.004441	0	0.000759
ENST00000432782	ENSG00000232913	PLCE1-AS2	0	0	0	0.006487	0	0
ENST00000447227	ENSG00000228553	AL389885.1	0	0	0	0.00817	0	0
ENST00000411906	ENSG00000234699	AL139339.1	0	0	0	0.000825	0	0
ENST00000568017	ENSG00000260461	AL133355.1	0.003422	0.000378	0.000127	0.032841	3e-05	0
ENST00000425050	ENSG00000229981	LINC01435	0	0	0	0.007007	0	0
ENST00000531977	ENSG00000224023	EDRF1-DT	0.000567	0.001819	0.000961	0.022091	0.000872	0.000127
ENST00000622358	ENSG00000275666	RF01946	0	0	0	0.001202	0	0
ENST00000534653	ENSG00000255179	AC027804.1	0.001195	0.007099	0	0.075021	0	0.003504
ENST00000526616	ENSG00000254983	AC025300.1	0	0	0	0.016703	0	0
ENST00000648524	ENSG00000255411	LINC02548	0	0	0.008241	0.014374	0	0
ENST00000527978	ENSG00000255308	AC009652.2	0	0	0	0.01191	0	0.006795
ENST00000531363	ENSG00000254560	BBOX1-AS1	0	0	0	0.025677	0	0
ENST00000527727	ENSG00000255227	AC090124.2	0	0	0	0.070613	0.009225	0
ENST00000648000	ENSG00000255171	LINC01499	0	0	0	0.003289	0	0
ENST00000366360	ENSG00000270072	AC090559.2	0.00389	0	0.010449	0.07606	0	0.008754
ENST00000527054	ENSG00000255299	AP003557.1	0	0	0.009011	0.019702	0	0
ENST00000525714	ENSG00000255240	AP001636.3	0	0	0	0.010294	0	0
ENST00000561588	ENSG00000260877	AP005233.2	0	0.015125	0	0.024078	0	0
ENST00000528507	ENSG00000254605	AP003555.2	0	0	0	0.015912	0	0
ENST00000542598	ENSG00000256448	AP000763.3	0	0	0	0.082652	0	0
ENST00000523626	ENSG00000246174	KCTD21-AS1	0	0	0	0.033267	0	0
ENST00000464648	ENSG00000239856	RN7SL225P	0	0	0	0.035092	0	0
ENST00000543573	ENSG00000245552	AP000787.1	0	0	0	0.02024	0	0
ENST00000511243	ENSG00000255679	JRKL-AS1	0	0	0	0.073372	0	0
ENST00000500970	ENSG00000245248	USP2-AS1	0	0.002056	0	0.005178	0	0.000533
ENST00000578923	ENSG00000245248	USP2-AS1	0	0	0	0.010627	0	0
ENST00000578216	ENSG00000263873	AP003396.5	0	0	0	0.007879	0	0
ENST00000524453	ENSG00000254568	AP003501.1	0	0	0	0.006543	0	0
ENST00000602376	ENSG00000175773	AP002986.1	0	0	0	0.001186	0	0
ENST00000532116	ENSG00000175773	AP002986.1	0	0	0	0.005768	0	0
ENST00000537514	ENSG00000177406	AC021054.1	0.00025	2.4e-05	0	0.005198	0	0
ENST00000547834	ENSG00000258325	ITFG2-AS1	0	0	0	0.246918	0	0
ENST00000648157	ENSG00000245105	A2M-AS1	0	0	0.006092	0.014936	0	0
ENST00000394742	ENSG00000247498	GPRC5D-AS1	0	0	0	0.026144	0.013991	0
ENST00000535755	ENSG00000256879	AC129102.1	0	0	0	0.039838	0	0
ENST00000542489	ENSG00000255644	AC010185.1	0	0	0	0.045866	0.006597	0
ENST00000500632	ENSG00000247903	AC024896.1	0	0.003904	3.2e-05	0.027482	0.001466	0.00311
ENST00000618746	ENSG00000273765	AC024257.4	0	0	0	0.020169	0	0
ENST00000553174	ENSG00000257346	AC011603.1	0	0	0	0.043755	0	0
ENST00000551146	ENSG00000258057	BCDIN3D-AS1	0	0	0	0.000185	0	0
ENST00000604939	ENSG00000271065	AC107031.1	0	0.009831	0	0.032806	0	0
ENST00000549388	ENSG00000257337	AC068888.1	0	0	0	0.00307	0	0
ENST00000545821	ENSG00000256314	AC078962.3	0	0	0	0.001446	0	0
ENST00000546135	ENSG00000256670	AC078962.4	0	0.008683	0	0.022125	0	0
ENST00000552046	ENSG00000257183	AC090502.3	0	0	0	0.008434	0	0
ENST00000551082	ENSG00000257526	AC107032.2	3.3e-05	0.000111	0.004526	0.007697	0	0
ENST00000550634	ENSG00000257429	AC074031.1	0	0	0	0.045969	0	0
ENST00000549161	ENSG00000257467	PPFIA2-AS1	0	0	0	0.00603	0	0
ENST00000549527	ENSG00000257894	AC027288.3	0.000364	0	0	0.018713	0	0
ENST00000547094	ENSG00000257725	LINC02399	0	0	0	0.007233	0	0
ENST00000551372	ENSG00000257458	AC069437.1	0	0	0	0.012119	0	0
ENST00000548329	ENSG00000258240	AC002351.1	0	0	0	0.037631	0	0
ENST00000442119	ENSG00000234608	MAPKAPK5-AS1	0.003944	0.03007	0.005416	1.14034	0.000393	0.083377
ENST00000539446	ENSG00000255857	PXN-AS1	3.2e-05	0	0	0.00034	0	3.7e-05
ENST00000611714	ENSG00000274695	AC108704.1	0.006425	0.012749	0.011485	0.053318	0	0
ENST00000537032	ENSG00000255933	AC117500.2	0	0	0	0.00157	0	0
ENST00000535242	ENSG00000256312	AC138466.1	0	0	0	0.021973	0	0
ENST00000537762	ENSG00000256542	AC148477.2	0	0	0.0003	0.006882	0	0
ENST00000422148	ENSG00000223576	AL355001.1	0	0	0	0.011776	0	0
ENST00000593246	ENSG00000224743	TEX26-AS1	0	0	0	0.026242	0	0
ENST00000433788	ENSG00000238185	AL353680.1	0	0	0	0.007118	0	0
ENST00000434565	ENSG00000223685	LINC00571	0	0	0	0.002208	0	0
ENST00000444442	ENSG00000233821	ENOX1-AS1	0	0	0	0.00521	0	0
ENST00000649910	ENSG00000231817	LINC01198	0	0	0	0.003519	0	0
ENST00000606351	ENSG00000235903	CPB2-AS1	0	0	0	0.015472	0	0
ENST00000506633	ENSG00000251015	SLC25A30-AS1	0.008913	0.009404	0	0.028156	0	0
ENST00000458725	ENSG00000231607	DLEU2	0.091963	0.326082	0.613205	3.06649	0.548657	0.130408
ENST00000600477	ENSG00000236778	INTS6-AS1	0	0	0	0.005708	0	0
ENST00000594358	ENSG00000236778	INTS6-AS1	0	0.008098	0	0.039863	0	0.016992
ENST00000615635	ENSG00000275741	AL162497.1	0	0	0	0.020054	0	0
ENST00000649577	ENSG00000285672	AL160396.2	0	0	0	0.011928	0	0
ENST00000557602	ENSG00000258616	LINC02303	0	0	0	0.007818	0	0
ENST00000556713	ENSG00000258857	AL359397.1	0	0	0	0.015979	0	0
ENST00000553603	ENSG00000259007	AL358333.3	0	0	0	0.021832	0	0
ENST00000649691	ENSG00000258791	LINC00520	0	0	0	0.005018	0	0
ENST00000557544	ENSG00000258777	HIF1A-AS1	0	0.00587	0.010512	0.235725	0.003782	0.003462
ENST00000554898	ENSG00000258957	AL359317.2	0	0.004557	0	0.034214	0	0.002692
ENST00000485097	ENSG00000239910	RN7SL530P	0.007492	0	0	0.025032	0	0.003739
ENST00000613926	ENSG00000273711	AC005520.5	0.300083	0.042062	0.038232	0.812208	0.045185	0.032613
ENST00000554552	ENSG00000258425	AC013451.1	0	0	0	0.010868	0	0
ENST00000556236	ENSG00000259138	AL049780.2	0.001731	0.026216	0.018456	0.202739	0	0.057762
ENST00000554225	ENSG00000258454	AC016526.2	0.006651	0	0	0.030166	0	0
ENST00000556328	ENSG00000258789	AL162171.2	0	0	0	0.007112	0	0
ENST00000557524	ENSG00000258798	AL133153.2	0	0	0	0.015978	0	0
ENST00000553638	ENSG00000258793	AL355102.4	0	0	0	0.056538	0	0
ENST00000554822	ENSG00000246223	LINC01550	0	0	0	0.024466	0	0
ENST00000504332	ENSG00000251602	AL928654.1	0	0	0	0.083952	0	0
ENST00000383019	ENSG00000206187	LINC02346	0	0	0	0.005316	0	0
ENST00000553644	ENSG00000258853	AC021979.2	0	0	0	0.023517	0	0
ENST00000501830	ENSG00000247728	AC091057.2	0	0	0	0.06025	0	0.003174
ENST00000561999	ENSG00000261064	LINC02256	0	0	0	0.138921	0	0
ENST00000561054	ENSG00000259434	AC068875.1	0	0	0	0.007771	0	0
ENST00000558967	ENSG00000259521	INO80-AS1	0	0	0	0.01025	0	0
ENST00000560178	ENSG00000259521	INO80-AS1	0	0	0	0.006497	0	0
ENST00000578594	ENSG00000265814	RN7SL376P	0	0.002942	0	0.011883	0	0
ENST00000559148	ENSG00000259255	AC073941.1	0	0	0	0.013137	0	0
ENST00000560159	ENSG00000259618	AC012170.3	0	0	0	0.0221	0	0
ENST00000560503	ENSG00000259223	AC009654.1	0	0	0	0.013814	0	0
ENST00000566715	ENSG00000260988	AC090260.1	0	0	0	0.016247	0	0
ENST00000560057	ENSG00000259322	AC090607.1	0	0	0	0.000932	0	0
ENST00000570202	ENSG00000260608	AC024270.4	0	0	0	0.010267	0.004154	0
ENST00000556928	ENSG00000258754	LINC01579	0	0	0	0.003885	0	0
ENST00000553321	ENSG00000258384	AC068831.1	0	0	0	0.029776	0	0.017817
ENST00000560461	ENSG00000259583	AC015712.2	0	0	0	0.021982	0	0
ENST00000621088	ENSG00000276984	AL023881.1	0	0	0	0.019108	0	0.008274
ENST00000567829	ENSG00000261505	AL031714.1	0	0	0	0.003606	0	0
ENST00000415176	ENSG00000226890	Z97652.1	0	0	0	0.026586	0	0.002291
ENST00000570022	ENSG00000261399	AL031710.1	0	0	0	0.0144	0	0
ENST00000567888	ENSG00000260778	AC009065.4	0	0	0	4.6e-05	7e-06	2e-06
ENST00000561653	ENSG00000260095	AC106820.3	0	0	0	0.051716	0	0
ENST00000573414	ENSG00000263072	ZNF213-AS1	0	0	0.019513	0.059133	0	0
ENST00000572930	ENSG00000261971	MMP25-AS1	0.002087	0.007881	0.004571	0.033953	0	0
ENST00000569678	ENSG00000261442	AC023830.1	0	0	0	0.013555	0	0.002782
ENST00000573319	ENSG00000262117	BCAR4	0	0	0	0.02668	0	0
ENST00000573856	ENSG00000262171	AC130651.1	0	0	0	0.013824	0	0
ENST00000571660	ENSG00000262848	AC136624.2	0	0	0	0.008367	0	0
ENST00000567047	ENSG00000261465	AC099518.4	0	0.002725	0	0.029249	0	0
ENST00000575612	ENSG00000263331	AC008551.1	0	0	0	0.052072	0	0
ENST00000568895	ENSG00000261669	AC008731.1	0	0	0	0.000301	0	0
ENST00000564381	ENSG00000261045	LINC02129	0	0	0	0.020194	0	0
ENST00000569039	ENSG00000238045	AC009133.1	0	0	0	0.004372	0	0
ENST00000569809	ENSG00000238045	AC009133.1	0	0	0	0.010787	0	0
ENST00000569175	ENSG00000261731	AC074050.3	0	0	0	0.023485	0	0
ENST00000563251	ENSG00000261633	AC018552.3	0	0	0	0.015497	0	0
ENST00000562304	ENSG00000261638	AC092378.2	0	0	0	0.02057	0	0
ENST00000568134	ENSG00000245768	AC092378.1	0	0	0	0.002053	0	0
ENST00000569088	ENSG00000260891	AC020978.3	0	0	0	0.011009	0	0
ENST00000568931	ENSG00000259833	AC138625.2	0	0	0	0.008804	0	0
ENST00000563981	ENSG00000260788	AC009063.2	0	0	0	0.004187	0	0
ENST00000562393	ENSG00000260859	AC025280.1	0	0.008852	0	0.042057	0	0
ENST00000602617	ENSG00000270159	AC018695.3	0	0	0	0.01521	0	0
ENST00000568070	ENSG00000260528	FAM157C	0	0	0	0.009546	0	0
ENST00000621799	ENSG00000260923	LINC02193	0	0	0	0.004919	0	0
ENST00000562298	ENSG00000261373	VPS9D1-AS1	0	0	0	0.075984	0	0
ENST00000574008	ENSG00000262905	AC015853.1	0	0	0	0.017194	0.002954	0
ENST00000573075	ENSG00000186594	MIR22HG	0	0	0	0.086471	0	0
ENST00000631268	ENSG00000235085	AC091153.2	0	0	0	0.01166	0	0
ENST00000572547	ENSG00000267047	AC040977.2	0	0	0	0.018056	0.001207	0
ENST00000580537	ENSG00000265749	AC135178.3	0	0	0	0.01226	0	0
ENST00000580194	ENSG00000233002	AC005324.1	0	0	0	0.006093	0	0
ENST00000473804	ENSG00000239221	RN7SL442P	0	0	0	0.009913	0	0
ENST00000583062	ENSG00000266677	AC087164.1	0	0.002071	0	0.005221	0	0.000681
ENST00000578640	ENSG00000264932	AC115989.1	0	0	0	0.003467	0	0
ENST00000423473	ENSG00000233098	CCDC144NL-AS1	0	0	0	0.002202	0	0.000469
ENST00000579154	ENSG00000265908	AC024267.5	0	0	0	0.017458	0	0
ENST00000581633	ENSG00000264125	AC104984.1	0	0	0	0.007684	0	0
ENST00000578774	ENSG00000266208	AC080112.1	0	0	0	0.004994	0	0
ENST00000585620	ENSG00000267505	AC005180.2	0	0.00646	0	0.036468	0.011883	0
ENST00000591137	ENSG00000267405	AC005180.1	0	0	0	0.023629	0.008163	0
ENST00000586376	ENSG00000267121	AC008105.3	0	0	0	0.025555	0	0
ENST00000588504	ENSG00000267278	MAP3K14-AS1	0	0.006825	0	0.019276	0.002598	0
ENST00000582066	ENSG00000263766	AC025682.1	0	0	0	0.033344	0	0
ENST00000584597	ENSG00000265702	AC005821.1	0	0	0	0.019917	0	0
ENST00000636248	ENSG00000283538	AC005972.3	0	0	0	0.001977	0	0
ENST00000580253	ENSG00000263501	AC005828.2	0	0	0	0.009928	0	0
ENST00000582093	ENSG00000264270	AC087749.1	0	0	0	0.010965	0	0
ENST00000647961	ENSG00000267123	SCAT1	0.000425	0.000963	0.003352	0.014021	0	0.000283
ENST00000576808	ENSG00000262979	AC124319.2	0	0	0	0.016014	0	0
ENST00000572151	ENSG00000263069	AC124319.3	0	0	0	0.002197	0	0.001123
ENST00000582363	ENSG00000263753	LINC00667	0.001246	0	0	0.00465	0	0
ENST00000582008	ENSG00000263753	LINC00667	0.027829	0	0	0.086886	0	0
ENST00000580197	ENSG00000265933	LINC00668	0	0	0	0.02678	0.006268	0
ENST00000588197	ENSG00000267199	AP001029.2	0	0	0	0.038189	0	0
ENST00000592747	ENSG00000266957	AC012254.1	0	0	0	0.032767	0	0
ENST00000586391	ENSG00000267146	AC012301.1	0	0	0	0.00792	0	0
ENST00000591854	ENSG00000267040	AC027097.1	0	0	0	0.040787	0.008424	0
ENST00000592201	ENSG00000267040	AC027097.1	0	0	0	0.005423	0	0
ENST00000588298	ENSG00000267269	AC010776.1	0	0	0	0.006427	0	0
ENST00000590357	ENSG00000267175	AC105094.2	0	0	0.000513	0.002324	0	0
ENST00000582546	ENSG00000266844	AC093330.1	0	0	0	0.012879	0	0
ENST00000591742	ENSG00000267628	AC104423.1	0	0	0	0.028729	0	0
ENST00000613285	ENSG00000275162	AC005391.1	0	0	0	0.014336	0	0
ENST00000592758	ENSG00000267469	AC005944.1	0	0	0	6.64032	0	0
ENST00000588758	ENSG00000176840	MIR7-3HG	0	0	0	0.030734	0	0
ENST00000594056	ENSG00000269680	AC008760.1	0	0	0	0.015193	0	0
ENST00000498758	ENSG00000244080	RN7SL833P	0.003052	0.007129	0.012737	0.365274	0.060841	0.014885
ENST00000597851	ENSG00000269085	AC008764.5	0.005105	0	0	0.050981	0	0
ENST00000634675	ENSG00000282851	BISPR	0	0	0.005933	0.018529	0.003538	0
ENST00000596192	ENSG00000269161	AC010618.3	0	0	0	0.003713	0	0
ENST00000597769	ENSG00000269694	AC005197.1	0	0	0	0.026614	0	0
ENST00000598042	ENSG00000268038	LINC01785	0	0	0	0.004081	0	0
ENST00000588122	ENSG00000267575	AC006504.5	0	0	0	0.007983	0	0
ENST00000592680	ENSG00000267213	AC007773.1	0	0	0	0.022296	0	0
ENST00000597830	ENSG00000268751	SCGB1B2P	0	0	0	0.025862	0	0
ENST00000605640	ENSG00000271032	AC020907.4	0	0	0	0.027939	0.007686	0
ENST00000578043	ENSG00000264317	RN7SL154P	0	0	0	0.001829	0	0
ENST00000591531	ENSG00000267260	AC020928.2	4.1e-05	0	0	0.009678	5.6e-05	0
ENST00000590304	ENSG00000266963	AC005625.1	0	0	0	0.038311	0	0.012935
ENST00000585999	ENSG00000267375	AC008649.2	0	0	0	0.029572	0	0
ENST00000588495	ENSG00000267107	PCAT19	0	0	0	0.00107	6e-05	0.000151
ENST00000457234	ENSG00000213904	LIPE-AS1	0	0	0	0.02724	0.006618	0
ENST00000600529	ENSG00000268530	AC008403.3	0	0	0	0.011843	0	0
ENST00000594379	ENSG00000269535	AC010320.4	0	0	0	0.005489	0	0
ENST00000652740	ENSG00000226696	LENG8-AS1	0	0.01706	0	0.110756	0	0
ENST00000586961	ENSG00000267265	AC011476.3	0	0	0	0.008692	0.002831	0
ENST00000651165	ENSG00000285996	AC006116.11	0.004453	0	0	0.012536	0	0.002796
ENST00000601567	ENSG00000267871	ZNF460-AS1	0	0	0	0.006066	0	0
ENST00000430192	ENSG00000236790	LINC00299	0	0.000547	0.000406	0.056427	0	0
ENST00000431557	ENSG00000235072	AC012074.1	0	0	0	0.010799	0	0
ENST00000447070	ENSG00000234072	AC074117.1	0	0.009486	0	0.032408	0	0
ENST00000609942	ENSG00000229692	SOS1-IT1	0	0	0	0.391289	0	0
ENST00000420644	ENSG00000229692	SOS1-IT1	0	0	0	0.039309	0	0
ENST00000439606	ENSG00000227028	SLC8A1-AS1	0	0	0.014895	0.036231	0	0
ENST00000597385	ENSG00000227028	SLC8A1-AS1	0	0	0	0.01189	0	0
ENST00000425212	ENSG00000231826	LINC01819	0	0.043528	0	0.067745	0	0
ENST00000611671	ENSG00000273913	RF00017	0	0	0	0.019778	0	0
ENST00000444077	ENSG00000232696	AC017006.2	0	0	0	0.002855	0	0
ENST00000506009	ENSG00000250116	AC018682.1	0.005187	0	0	0.013769	0.00122	0
ENST00000622819	ENSG00000277396	RF00017	0	0	0	0.013305	0	0
ENST00000651429	ENSG00000230773	AC092650.1	0	0	0	0.002421	0	0
ENST00000429952	ENSG00000231609	AC007098.1	0	0	0.004047	0.012156	0.002771	0
ENST00000610137	ENSG00000273196	AC062037.2	0.011153	0	0	0.046796	0.010987	0
ENST00000439077	ENSG00000228363	AC015971.1	0	0	0	0.005872	0	0
ENST00000642872	ENSG00000222041	CYTOR	0.108024	0.125291	0.082346	1.53231	0.065717	0.464568
ENST00000612307	ENSG00000277701	AC159540.2	0	0	0	0.008247	0	0
ENST00000622367	ENSG00000277701	AC159540.2	0	0	0	0.01925	0	0
ENST00000456519	ENSG00000224509	AC010884.1	0	0	0	0.002335	0	0
ENST00000426124	ENSG00000225744	AC017002.2	0	0	0	0.006602	0	0
ENST00000483161	ENSG00000240183	RN7SL297P	0	0	0	0.000714	0	0
ENST00000588733	ENSG00000235066	AC009303.2	0	0	0	0.01226	0	0
ENST00000591103	ENSG00000272895	AC009303.3	0	0	0	0.000616	0	0
ENST00000468841	ENSG00000243510	RN7SL111P	0.004792	0	0	0.028987	0	0
ENST00000598065	ENSG00000231731	AC010976.1	0	0	0	0.040849	0	0
ENST00000628607	ENSG00000231731	AC010976.1	0	0	0	0.002184	0	0
ENST00000363848	ENSG00000200718	RN7SKP103	0	0	0	0.019717	0	0.011469
ENST00000625887	ENSG00000226674	TEX41	0	0	0	0.008006	0	0
ENST00000627497	ENSG00000226674	TEX41	0	0	0	0.015164	0	0
ENST00000453016	ENSG00000226266	AC009961.1	0	0.000185	5e-06	0.002161	0	0
ENST00000457108	ENSG00000232411	AC009495.2	0	0	0	0.021622	0	0
ENST00000651673	ENSG00000236107	SCN1A-AS1	0	0	0	0.003015	0	0
ENST00000435328	ENSG00000228016	RAPGEF4-AS1	0	0	0	0.000857	0	0
ENST00000457053	ENSG00000236664	AC011998.3	0	0	0	0.011391	0	0
ENST00000443132	ENSG00000213963	AC019080.1	0	0	0	0.047554	0	0
ENST00000592161	ENSG00000237298	TTN-AS1	0	0	0	0.012537	0	0
ENST00000592836	ENSG00000237298	TTN-AS1	0	0	0	0.025234	0	0
ENST00000456653	ENSG00000237877	LINC01473	0	0	0	0.014085	0	0
ENST00000419719	ENSG00000237877	LINC01473	0	0	0	0.071058	0	0.017064
ENST00000609865	ENSG00000233766	AC098617.1	0	0	0	0.027845	0	0
ENST00000598327	ENSG00000233766	AC098617.1	0	0	0	0.073723	0	0
ENST00000452787	ENSG00000237166	LINC01792	0	0	0	0.010202	0	0
ENST00000629993	ENSG00000226312	CFLAR-AS1	0	0	0	0.02451	0	4.1e-05
ENST00000625831	ENSG00000225216	AC007362.1	0	0	0	0.024496	0	0
ENST00000420418	ENSG00000234281	LANCL1-AS1	0	0	0	0.002124	0	0
ENST00000422353	ENSG00000237525	AC012668.3	0	0	0	0.057781	0	0
ENST00000446709	ENSG00000234193	AC013476.1	0	0	0.004084	0.006881	0	0
ENST00000420044	ENSG00000225956	AL050320.1	0	0	0	0.01808	0	0
ENST00000616177	ENSG00000232712	KIZ-AS1	0.000641	0	0	0.001934	0	0
ENST00000652062	ENSG00000283072	AL158175.1	0	0	0	0.003326	0	0
ENST00000454205	ENSG00000236388	ITCH-AS1	0	0	0	0.039361	0	0
ENST00000437016	ENSG00000206249	AL359555.1	0	0	0	0.008451	0	0
ENST00000464331	ENSG00000241229	RN7SL443P	0	0	0	0.082097	0	0
ENST00000427598	ENSG00000244558	KCNK15-AS1	0.009271	0	0	0.081312	0	0
ENST00000466981	ENSG00000276031	RN7SL197P	0	0	0	0.019936	0	0
ENST00000624627	ENSG00000274333	CU633967.1	0	0.088801	0	0.424993	0	0
ENST00000624846	ENSG00000280145	CU638689.4	0	0	0	0.003187	0	0
ENST00000430001	ENSG00000224649	AF124730.1	0	0	0	0.03911	0	0
ENST00000608759	ENSG00000273464	AP000238.1	0	0	0	0.038949	0	0.023
ENST00000420364	ENSG00000215533	LINC00189	0	0	0	0.008465	0	0
ENST00000429588	ENSG00000230479	AP000695.1	0	0	0	0.018303	0	0
ENST00000329015	ENSG00000184385	UMODL1-AS1	0	0	0	0.003803	0	0
ENST00000423310	ENSG00000230061	TRPM2-AS	0.005378	0	0	0.023589	0	0.004697
ENST00000596207	ENSG00000267857	AL133499.1	0	0	0	0.030616	0	0
ENST00000506039	ENSG00000249923	AC007663.2	0	0	0	0.002071	0	0
ENST00000444039	ENSG00000237476	LINC01637	0	0	0	0.023682	0.011879	0
ENST00000623947	ENSG00000280025	AL008638.6	0	0	0	0.001221	0	6.2e-05
ENST00000504184	ENSG00000213888	LINC01521	0.002936	0.000329	0.000233	0.008197	0.000241	0.000142
ENST00000621921	ENSG00000205853	RFPL3S	0	0	0	0.008171	0	0
ENST00000420171	ENSG00000230736	AL021937.1	0	0	0	0.012066	0	0
ENST00000430883	ENSG00000243902	FP325335.1	0	0	0	0.010263	0	0
ENST00000513758	ENSG00000249310	APOBEC3B-AS1	0	0	0	0.005846	0	0
ENST00000623440	ENSG00000279175	AL033543.1	0.000586	0.000309	0	0.001555	0	0
ENST00000435439	ENSG00000197182	MIRLET7BHG	0	0	0	0.022172	0	0
ENST00000652750	ENSG00000224271	AL117329.1	0	0	0	0.025196	0	0
ENST00000624882	ENSG00000279345	Z98885.3	0	0	0	0.008928	0	0
ENST00000623684	ENSG00000279182	CR559946.2	0	0	0	0.006261	0	0
ENST00000439325	ENSG00000233912	AC026202.2	0.004984	0.006618	0.002371	0.054191	0.002911	0
ENST00000649560	ENSG00000228351	AC018832.1	0.004253	0	0	0.012208	0	0
ENST00000468186	ENSG00000206573	THUMPD3-AS1	0	0.046595	0.104219	0.292969	0	0
ENST00000420253	ENSG00000228242	AC093495.1	0	0	0	0.040519	0	0
ENST00000610011	ENSG00000249786	EAF1-AS1	0	0	0	0.021429	0	0
ENST00000432505	ENSG00000224074	LINC00691	0	0	0	0.004685	0	0
ENST00000628210	ENSG00000232354	VIPR1-AS1	0	0	0	0.000358	0	0
ENST00000429681	ENSG00000235236	AC137630.2	0	0	0	0.068828	0	0
ENST00000460833	ENSG00000241684	ADAMTS9-AS2	0	0	0	0.002833	0	0
ENST00000596732	ENSG00000244513	AC109587.1	0	0	0	0.011705	0	0
ENST00000595925	ENSG00000244513	AC109587.1	8.8e-05	0	0.001531	0.01519	0.000188	8.8e-05
ENST00000608707	ENSG00000272690	LINC02018	0.01575	0.008227	0.012225	0.132034	0.006681	0.009131
ENST00000629052	ENSG00000281392	AC107204.1	0	0	0	0.03462	0	0
ENST00000628435	ENSG00000281392	AC107204.1	0	0	0	0.006905	0	0
ENST00000477210	ENSG00000242759	LINC00882	0	0	0	0.095273	0	0
ENST00000479612	ENSG00000242759	LINC00882	2.5e-05	7.9e-05	1.7e-05	0.049765	0.000183	0
ENST00000476460	ENSG00000243276	AC068633.1	0	0	0	0.00104	0	0
ENST00000609469	ENSG00000272758	AC083798.2	0	0	0	0.01891	0	0.003164
ENST00000608701	ENSG00000273123	AC020634.1	0	0	0	0.004508	0	0
ENST00000495917	ENSG00000244286	ITGB5-AS1	0	0	0	0.030826	0	0
ENST00000506476	ENSG00000250129	AC116424.1	0	0	0	0.015676	0	0
ENST00000462431	ENSG00000244040	IL12A-AS1	0	0	0	0.010584	0	0
ENST00000483289	ENSG00000239219	AC008040.1	0	0	0	4e-06	0	0
ENST00000473110	ENSG00000239739	AC026316.2	0	0.003186	0	0.056668	0	0
ENST00000646056	ENSG00000242808	SOX2-OT	0	0	0	0.026056	0	0
ENST00000422946	ENSG00000223882	ABCC5-AS1	0	0	0	0.013963	0	0
ENST00000456535	ENSG00000226859	LINC02051	0	0	0	0.014061	0	0
ENST00000444729	ENSG00000232353	AC026320.1	0	0	0	0.062247	0	0
ENST00000641158	ENSG00000223812	AC073365.1	0	0	0	0.004432	0	0
ENST00000641055	ENSG00000223812	AC073365.1	0	0	0	1.62836	0	0
ENST00000597034	ENSG00000242086	MUC20-OT1	0	0	0.004589	0.031177	0	0
ENST00000631105	ENSG00000242086	MUC20-OT1	0	0	0	0.000124	0	0
ENST00000618708	ENSG00000242086	MUC20-OT1	0	0	0	0.055578	0	0
ENST00000626969	ENSG00000242086	MUC20-OT1	2.1e-05	0	0	0.085318	0	0
ENST00000630830	ENSG00000242086	MUC20-OT1	0	0.010431	0	0.029874	0	0
ENST00000630675	ENSG00000242086	MUC20-OT1	0	0	0	0.0086	0.002416	0
ENST00000420226	ENSG00000235897	TM4SF19-AS1	1e-05	2.9e-05	0.002275	0.061585	0	0.005215
ENST00000509244	ENSG00000249631	AC005699.1	0	0	0	0.00843	0	0
ENST00000609511	ENSG00000273257	AC069200.1	0	0	0	0.021368	0	0
ENST00000652065	ENSG00000250075	AC104806.2	0.003227	0	0	0.012243	0.001106	0
ENST00000651054	ENSG00000231782	LINC00575	0	0	0	0.01754	0	0
ENST00000511917	ENSG00000250062	AC104827.1	0	0	0.007214	0.019938	0	0
ENST00000501215	ENSG00000247775	SNCA-AS1	0	0	0	0.015809	0	0
ENST00000501965	ENSG00000246541	AC096746.1	0	0	0	0.001515	0	0
ENST00000500358	ENSG00000246090	AP002026.1	0.001622	0	0	0.006372	0.002146	0
ENST00000504955	ENSG00000251175	AC008243.1	0	0	0.00205	0.012008	0	0
ENST00000512833	ENSG00000250406	AC109811.1	0	0	0	0.001676	0	0
ENST00000513752	ENSG00000177822	TENM3-AS1	0	0	0	0.119926	0.053311	0
ENST00000508881	ENSG00000251365	LINC02236	0	0	0	0.005627	0	0
ENST00000513157	ENSG00000248150	LINC02150	0	0	0	0.00483	0	0
ENST00000510456	ENSG00000250250	AC010638.1	0	0	0	0.0083	0	0
ENST00000512978	ENSG00000248693	LINC02100	0	0	0	0.115822	0	0
ENST00000524042	ENSG00000253104	AC139497.1	0	0	0	0.008349	0	0
ENST00000651494	ENSG00000286182	AC112172.2	0	0	0	0.02013	0	0
ENST00000511840	ENSG00000251281	AC034223.2	0.014723	0.007644	0.020037	0.077562	0	0
ENST00000506429	ENSG00000248533	AC034226.1	0	0	0	0.037512	0	0
ENST00000577964	ENSG00000264391	RN7SL208P	0	0	0	0.03474	0	0
ENST00000650583	ENSG00000248323	LUCAT1	0	0	0	2.5e-05	0	0
ENST00000607854	ENSG00000248323	LUCAT1	0	0.019829	0	0.036545	0	0
ENST00000650321	ENSG00000248323	LUCAT1	0	0	0	0.009565	0	0
ENST00000651927	ENSG00000248588	AC008517.1	0	0	0.004052	0.01422	0	0
ENST00000607831	ENSG00000237187	NR2F1-AS1	0	1.4e-05	0	0.043034	0	0.021007
ENST00000504004	ENSG00000251076	AC104126.1	0	0.001287	0	0.014708	0	0
ENST00000508517	ENSG00000249249	AC010226.1	0.003037	0.001943	0.034025	0.21664	0.001542	0.007807
ENST00000442777	ENSG00000223652	AC106786.1	0.006766	0	0	0.051039	0.016027	0
ENST00000606251	ENSG00000245937	LINC01184	0	1.9e-05	0	0.00078	0	0
ENST00000446275	ENSG00000234758	AC034228.3	0	0	0	0.036409	0	0
ENST00000454380	ENSG00000238160	AC116366.2	0	0	0	0.019326	0	0
ENST00000513259	ENSG00000281398	SNHG4	0	0	0	0.421371	0	0
ENST00000622826	ENSG00000273557	AC008781.3	0.000784	0	0	0.003954	0	0
ENST00000467868	ENSG00000241291	RN7SL791P	0	0	0	0.007917	0	0
ENST00000522685	ENSG00000248647	AC012613.1	0	0	0	0.013511	0	0
ENST00000512647	ENSG00000248647	AC012613.1	0	0	0	0.031896	0	0
ENST00000519040	ENSG00000254333	NDST1-AS1	0	0.00017	0	0.039962	0	0
ENST00000517474	ENSG00000253852	AC011383.1	0	0	0	0.016949	0	0
ENST00000521697	ENSG00000254365	AC091820.2	0	0	0	0.027347	0	0
ENST00000366189	ENSG00000249684	AC106795.2	0	0	0	0.026385	0	0
ENST00000503314	ENSG00000248514	AC008443.4	0	0	0	0.021175	0	0
ENST00000456189	ENSG00000224846	AL133351.1	0	0	0	0.005099	0	0
ENST00000491317	ENSG00000183674	LINC00518	0	0	0	0.015556	0	0
ENST00000606628	ENSG00000228412	AL022068.1	0	0	0	0.000322	0	0
ENST00000427775	ENSG00000228772	AL033539.1	0	0	0	0.014075	0	0
ENST00000606878	ENSG00000224843	LINC00240	0	0	0	7.5e-05	0	0
ENST00000420081	ENSG00000224843	LINC00240	0	0	0	0.002481	0	0
ENST00000424968	ENSG00000224843	LINC00240	0	0	0	0.016392	0	0
ENST00000652085	ENSG00000224843	LINC00240	0.001494	0.007381	0.001988	0.019527	0	0.001987
ENST00000438190	ENSG00000227214	HCG15	0.002787	0.001326	0.000582	0.022185	0.003468	0
ENST00000413358	ENSG00000231074	HCG18	0.017362	0	0	0.04905	0	0
ENST00000606909	ENSG00000271821	AL662844.3	0	0	0	0.016875	0	0
ENST00000416684	ENSG00000234006	DDX39B-AS1	0	0	0	0.000567	0	0
ENST00000630418	ENSG00000274259	SYNGAP1-AS1	0	0	0	0.012796	0	0
ENST00000417465	ENSG00000227516	AL160163.1	0	0	0	0.034528	0	0
ENST00000607590	ENSG00000237686	AL109615.3	0	0	0	0.049705	0	0
ENST00000415787	ENSG00000236466	AL359633.2	5.3e-05	0	0	0.017632	0	0
ENST00000363221	ENSG00000200091	RN7SKP163	0	0	0	0.021866	0	0
ENST00000452402	ENSG00000233967	AL359715.1	0	0	0	0.061355	0	0
ENST00000443221	ENSG00000233967	AL359715.1	0.02879	0	0.017165	0.122338	0	0.012125
ENST00000420651	ENSG00000231889	TRAF3IP2-AS1	0	0.03346	0	0.137027	0.002463	0.000814
ENST00000521888	ENSG00000228624	HDAC2-AS2	0	0	0	7.2e-05	0	0
ENST00000439075	ENSG00000236548	RNF217-AS1	0	0	0	0.00644	0.00348	0
ENST00000606001	ENSG00000237742	AL365259.1	0	0	0	0.003969	0	0
ENST00000442449	ENSG00000233351	AL356124.2	0	0	0	0.010698	0	0
ENST00000626414	ENSG00000237596	AL138828.1	0	0	0.004503	0.01248	0	0
ENST00000580741	ENSG00000231028	LINC00271	0	0	0	0.001755	0	0
ENST00000455011	ENSG00000234147	AL035446.1	0.060007	0.027372	0.063104	0.825042	0.001942	0.016809
ENST00000650173	ENSG00000226571	AL592429.2	0	0	0	0.008639	0	0.002037
ENST00000443712	ENSG00000233452	STXBP5-AS1	0	0.007403	0	0.025291	0	0
ENST00000427394	ENSG00000233452	STXBP5-AS1	0	0.006419	0.010736	0.089468	0	0.032607
ENST00000412161	ENSG00000234577	SYNE1-AS1	0	0	0	0.040594	0	0
ENST00000603529	ENSG00000271234	AL078605.1	0	0	0	0.020915	0	0
ENST00000430250	ENSG00000227704	AL354892.1	0	0	0	0.027611	0	0
ENST00000438217	ENSG00000213863	AL731661.1	0	0	0	0.011708	0	0
ENST00000484550	ENSG00000240859	AC093627.4	0.001573	0.001661	0	0.006264	0	0
ENST00000487884	ENSG00000242474	AC093627.5	0.03612	0.035063	3e-06	0.238312	0.031428	0
ENST00000452622	ENSG00000223855	AC147651.1	0	0	0	0.030167	0	0.0035
ENST00000639998	ENSG00000229618	AC011287.1	0	0	0	0.008836	0	0
ENST00000622007	ENSG00000278569	RF00017	0	0	0	0.002139	0	0
ENST00000636929	ENSG00000236039	AC019117.1	0	0	0	0.007153	0	0
ENST00000453564	ENSG00000226097	AC099342.1	0	0	0	0.003428	0	0
ENST00000518947	ENSG00000254369	HOXA-AS3	0	0	0	0.00262	0	0
ENST00000579437	ENSG00000263683	AC005154.3	0	0	0	0.003184	0	0
ENST00000629576	ENSG00000281103	TRG-AS1	0	0	0	0.012299	0	0
ENST00000432405	ENSG00000227658	AC005160.1	0	0	0	0.006327	0	0
ENST00000628246	ENSG00000232006	AC005537.1	0	0	0	0.021875	0	0
ENST00000631050	ENSG00000232006	AC005537.1	0	0	0	0.021623	0	0
ENST00000438705	ENSG00000232956	SNHG15	0.113711	0.066599	0.093408	0.834167	0.073795	0
ENST00000435695	ENSG00000237819	AC002454.1	0.011821	0	4.9e-05	0.190081	0	0.000917
ENST00000468165	ENSG00000239480	AC073517.1	0	0	0	0.011889	0	0
ENST00000470135	ENSG00000228742	LINC02577	0	0.079026	0	0.240221	0	0.029416
ENST00000440512	ENSG00000233705	SLC26A4-AS1	0	0	0	0.010893	0	0
ENST00000452714	ENSG00000225572	DOCK4-AS1	0	0	0	0.004193	0	0
ENST00000451962	ENSG00000234520	AC018464.1	0	0	0	0.022325	0	0
ENST00000635364	ENSG00000282859	AC003992.1	0	0	0	0.01552	0	0
ENST00000446355	ENSG00000237813	AC002066.1	0	0	0	0.030059	0	0
ENST00000650435	ENSG00000231210	LINC01510	0.001052	0	0.005214	0.010212	0	0
ENST00000643452	ENSG00000285106	AC016831.7	0	0	0	0.000233	0	0
ENST00000472015	ENSG00000216895	AC009403.1	0.005451	0.083311	0.007701	0.284964	0.023753	0.043688
ENST00000517732	ENSG00000253641	AC104964.1	0	0	0	0.009304	0	0
ENST00000518098	ENSG00000253641	AC104964.1	0	0	0	0.029044	0	0
ENST00000649481	ENSG00000285675	AC023385.1	0	0	0	0.00509	0	0
ENST00000522026	ENSG00000253695	AC011008.1	0	0	0	0.006955	0	0
ENST00000647689	ENSG00000285881	AC105206.3	0	0.010973	0	0.03646	0	0
ENST00000522547	ENSG00000253430	AC011726.2	0	0	0	0.007548	0	0.002903
ENST00000558292	ENSG00000259196	HMBOX1-IT1	0.003179	0	0	0.01105	0	0
ENST00000523411	ENSG00000254038	AC092818.1	0	0.003274	0	0.008547	0	0
ENST00000527912	ENSG00000254898	AC087362.1	0	0	0	0.002169	0	0
ENST00000521363	ENSG00000253802	SIRLNT	0	0	0	0.017726	0	0
ENST00000564481	ENSG00000261449	AC103724.3	0	0	0	0.021084	0	0
ENST00000518942	ENSG00000228801	AC064807.1	0.07606	0.10265	0.038596	0.624176	0.040324	0.06467
ENST00000523786	ENSG00000246430	LINC00968	0	0	0	0.003748	0	0
ENST00000521483	ENSG00000246430	LINC00968	0	0	0	0.006103	0	0
ENST00000518732	ENSG00000254300	LINC01111	0	0.016999	0	0.076379	0	0.001593
ENST00000524190	ENSG00000251136	AF117829.1	0	0	0	0.098913	0	0
ENST00000517512	ENSG00000253320	AZIN1-AS1	0	0	0	0.014862	0	0
ENST00000519979	ENSG00000253320	AZIN1-AS1	0	0	0	0.017016	0	0
ENST00000524236	ENSG00000253434	LINC02237	0	0	0	0.000717	0	0
ENST00000524355	ENSG00000253286	AC090193.1	0	0	0	0.044382	0	0
ENST00000523190	ENSG00000249859	PVT1	0	0	0	0.031757	0	0
ENST00000449442	ENSG00000218839	FAM138C	0	0	0	0.005043	0	0
ENST00000416826	ENSG00000236404	VLDLR-AS1	0	0	0.006377	0.016664	0	0
ENST00000430387	ENSG00000237359	AL354977.2	0	0	0	0.028729	0	0
ENST00000417638	ENSG00000235448	LURAP1L-AS1	0	0	0	0.064755	0	0
ENST00000440888	ENSG00000233906	AL445623.1	0	0	0	0.149589	0	0
ENST00000582301	ENSG00000240498	CDKN2B-AS1	0	0	0	0.003239	0	0
ENST00000449235	ENSG00000236849	LINC01474	0.000887	0	0	0.014193	0	0
ENST00000419815	ENSG00000233262	AL356134.1	0	0	0	0.017154	0	0
ENST00000411080	ENSG00000223012	RN7SKP264	0	0	0	0.018092	0	0
ENST00000649461	ENSG00000236130	PTCSC2	0.008269	0.013253	0	0.039067	0	0
ENST00000427039	ENSG00000237461	AL359710.1	0	0	0	0.004606	0	0
ENST00000566531	ENSG00000261094	AC007066.2	0.007239	0.014205	0.008695	0.263229	0.000207	0.036975
ENST00000603624	ENSG00000225361	PPP1R26-AS1	0.004511	0	0.004445	0.045782	0.007451	0.002865
ENST00000496793	ENSG00000203993	ARRDC1-AS1	0	0	0	3e-06	0	0
ENST00000430235	ENSG00000236871	LINC00106	0	0	0.016862	0.071919	0	0.007131
ENST00000651703	ENSG00000230590	FTX	0	0	0	0.006827	0	0
ENST00000438219	ENSG00000235802	HCFC1-AS1	0	0	0	0.014939	0	0
ENST00000444722	ENSG00000224216	AC234781.1	0	0	0	0.019669	0	0
ENST00000412436	ENSG00000224216	AC234781.1	0	0	0	0.004643	0	0
ENST00000416696	ENSG00000229484	AC243836.1	0	0	0	0.044727	0	0
ENST00000401018	ENSG00000215866	LINC01356	0	0	0	0.005749	0	0
ENST00000484057	ENSG00000242769	RN7SL432P	0	0	0	0.034858	0	0
ENST00000441773	ENSG00000238022	AL390730.2	0	0	0	0.015515	0	0
ENST00000436974	ENSG00000226375	AL022310.1	0	0	0	0.012723	0	0
ENST00000609032	ENSG00000273198	AL096803.3	0	0	0	0.019657	0	0
ENST00000422480	ENSG00000225172	AC096631.1	0	0	0	0.006786	0	0
ENST00000642887	ENSG00000285254	AL513128.2	0	0	0	0.004066	0	0
ENST00000445873	ENSG00000236311	TLX1NB	0	0	0	0.003522	0	0
ENST00000649903	ENSG00000285656	AP002793.1	0	0	0.008649	0.031401	0	0
ENST00000514294	ENSG00000246100	LINC00900	0	0	0	0.010195	0	0
ENST00000552712	ENSG00000257784	LINC02400	0	0	0	0.023264	0	0
ENST00000553211	ENSG00000258331	LINC02461	0	0	0	0.012509	0	0
ENST00000542875	ENSG00000251301	LINC02384	0	0	0	0.009047	0	0
ENST00000549357	ENSG00000258053	AC025575.2	0	0	0	0.014491	0	0
ENST00000550506	ENSG00000257747	LINC02426	0	0	0	0.013863	0	0
ENST00000548722	ENSG00000257194	AC126178.1	0	0.004493	0	0.011255	0	0
ENST00000469386	ENSG00000276956	RN7SL769P	0	0	0	0.032731	0	0
ENST00000547876	ENSG00000257517	AC026765.1	0.008207	0	0	0.033618	0	0
ENST00000543558	ENSG00000255714	LINC02460	0	0	0	0.03902	0	0
ENST00000433664	ENSG00000235221	LINC00383	0	0	0	0.0128	0	0
ENST00000450187	ENSG00000227676	LINC01068	0	0	0	0.074485	0	0
ENST00000647704	ENSG00000285684	AL137781.1	0	0	0	0.001907	0	0
ENST00000553785	ENSG00000258390	LINC02318	0	0.006216	0	0.023517	0	0.00737
ENST00000411367	ENSG00000223299	RN7SKP108	0	0	0	0.002019	0	0
ENST00000556136	ENSG00000230805	AL132709.1	0	0	0	0.037958	0	0
ENST00000553433	ENSG00000258736	AL583722.3	0	0	0	0.020264	0	0
ENST00000629082	ENSG00000280515	SALRNA2	0	0	0	0.005045	0	0
ENST00000556519	ENSG00000257060	AC091078.1	0	0	0	0.011511	0	0
ENST00000567096	ENSG00000259840	Z97653.1	0	0	0	0.023447	0	0
ENST00000564305	ENSG00000261617	LINC02177	0.001428	0	0	0.003948	0	0
ENST00000576600	ENSG00000263234	AC010401.2	0	0	0	0.01345	0	0
ENST00000564852	ENSG00000261555	AC025277.1	0	0	0	0.012595	0	0
ENST00000568752	ENSG00000261200	AC136944.2	0	0	0	0.001317	0	0
ENST00000641266	ENSG00000261241	LINC02128	0	0	0	0.004799	0	0
ENST00000566649	ENSG00000261803	LINC02140	0	0	0	0.003995	0	0
ENST00000418393	ENSG00000234477	AC004231.1	0	0	0	0.012446	0	0
ENST00000565120	ENSG00000261514	LINC01976	0	0	0	0.024015	0	0
ENST00000621624	ENSG00000274198	AC025521.1	0	0	0	0.005363	0	0
ENST00000592809	ENSG00000267109	AC011990.1	0	0	0	0.042694	0	0
ENST00000605009	ENSG00000271239	AC007423.1	0	0	0	0.016679	0	0
ENST00000583163	ENSG00000266602	AC008109.1	0	0	0	0.011073	0	0
ENST00000621730	ENSG00000274776	AC090241.3	0	0	0.006576	0.024142	0	0.002547
ENST00000591900	ENSG00000267215	AC040963.1	0	0	0	0.005992	0	0
ENST00000587961	ENSG00000266976	AC079466.1	0	0	0	0.004697	0	0
ENST00000600074	ENSG00000269072	AC063977.6	0	0	0	0.001799	0	0
ENST00000619715	ENSG00000273837	AC018755.4	0	0	0	0.020884	0	0
ENST00000450290	ENSG00000230975	AC012355.1	0	0	0	0.009748	0	0
ENST00000453322	ENSG00000228528	AC068057.1	0	0	0	0.01475	0	0
ENST00000419362	ENSG00000235615	AJ239322.1	0	0	0	0.004734	0	0
ENST00000569293	ENSG00000260142	AC068135.2	0	0	0	0.010173	0	0
ENST00000456031	ENSG00000231557	AC020718.1	0	0	0	0.037401	0	0
ENST00000445606	ENSG00000237767	LINC01370	0	0	0	0.014306	0	0
ENST00000651871	ENSG00000286063	AL121888.1	0	0	0	0.005094	0	0
ENST00000650710	ENSG00000286229	AL133335.1	0	0	0	0.009038	0	0
ENST00000416641	ENSG00000226956	AP000432.1	0	0	0	0.020266	0	0
ENST00000613045	ENSG00000205622	AP001043.1	0	0	0	0.014278	0	0
ENST00000433952	ENSG00000232837	LINC01700	0	0	0	0.006544	0	0
ENST00000434081	ENSG00000234880	LINC00163	0	0	0.002285	0.004853	0	0
ENST00000440867	ENSG00000223587	LINC01986	0	0	0	0.035449	0	0
ENST00000563865	ENSG00000261763	AC110716.2	0	0	0	0.000512	0	0
ENST00000645656	ENSG00000224153	LINC02054	0	0	0	0.005923	0	0
ENST00000652416	ENSG00000286089	AC095057.4	0	0	0	0.019441	0	0
ENST00000608365	ENSG00000272626	AC021146.12	0	0	0	0.021923	0	0
ENST00000504263	ENSG00000251321	PCAT4	0	0	0	0.002501	0	0
ENST00000569694	ENSG00000261166	AC073429.2	0	0	0	0.007242	0	0
ENST00000363373	ENSG00000200243	RN7SKP79	0	0	0	0.015562	0	0
ENST00000504552	ENSG00000250447	LINC02105	0	0	0	0.019462	0	0
ENST00000511953	ENSG00000250447	LINC02105	0	0	0	0.013623	0	0
ENST00000503650	ENSG00000251574	AC099520.1	0	0	0	0.00332	0	0
ENST00000651720	ENSG00000251574	AC099520.1	0	0	0	0.009174	0	0
ENST00000509718	ENSG00000251132	AC094104.2	0	0	0	0.011657	0	0
ENST00000510682	ENSG00000248445	SEMA6A-AS1	0	0	0	0.004226	0	0
ENST00000507558	ENSG00000248445	SEMA6A-AS1	0	0	0.019599	0.041974	0	0
ENST00000499583	ENSG00000245812	LINC02202	0	0.003636	0	0.007851	0	0
ENST00000609858	ENSG00000272745	AC004948.1	0	0	0	0.015562	0	0
ENST00000449899	ENSG00000231394	AC099681.2	0	0	0	0.019259	0	0
ENST00000435148	ENSG00000225718	AC092100.1	0	0	0	0.012832	0	0
ENST00000428449	ENSG00000230316	FEZF1-AS1	0	0	0	0.007883	0	0
ENST00000470677	ENSG00000241324	AC004930.1	0	0	0	0.005126	0	0
ENST00000445293	ENSG00000232053	AC078845.1	0	0.003931	0	0.013528	0	0.001289
ENST00000520487	ENSG00000254143	AC022733.2	0	0	0	0.019694	0	0
ENST00000524425	ENSG00000254687	AC009646.2	0	0	0	0.025321	0	0
ENST00000519844	ENSG00000253824	AP003472.1	0	0	0	0.01342	0	0
ENST00000523317	ENSG00000253627	AC105180.1	0	0	0	0.022787	0	0
ENST00000449144	ENSG00000227301	AL356489.1	0	0	0	0.009141	0	0
ENST00000450938	ENSG00000233569	AL161630.1	0	0	0	0.00805	0	0
ENST00000451869	ENSG00000229335	DANT1	0	0	0	0.001091	0	0
ENST00000415394	ENSG00000229335	DANT1	0	0	0	0.015865	0	0
TCONS_00023109	ENSG00000158828	PINK1	0	0	0	0.01074	0	0
TCONS_00023994	ENSG00000117713	ARID1A	0	0	0	0.01104	0	0
TCONS_00024955	ENSG00000146463	ZMYM4	0.002116	0	0	0.061593	0	0
TCONS_00025664	XLOC_010301	XLOC_010301	0	0	0	0.074115	0	0
TCONS_00008438	ENSG00000033122	LRRC7	0.011343	0	0	0.09306	0.013621	0
TCONS_00009230	ENSG00000117174	ZNHIT6	0	0	0	0.097265	0	0
TCONS_00028362	XLOC_011398	XLOC_011398	0	0	0	0.12066	0	0.00662
TCONS_00009952	ENSG00000188641	DPYD	0	0.004136	0.001189	0.128135	0	0.014168
TCONS_00011871	XLOC_004876	XLOC_004876	0	0	0	0.059366	0	0
TCONS_00031175	ENSG00000271425	NBPF10	0	0.157398	0	0.631541	0	0
TCONS_00031006	ENSG00000162825	NBPF20	0.168765	0	0.004522	1.55968	0.122947	0.511921
TCONS_00031003	ENSG00000162825	NBPF20	0.002157	0	0.011334	0.703195	0.159246	0.005512
TCONS_00031179	ENSG00000271425	NBPF10	0.052617	0.076655	0	0.690174	0	0.257489
TCONS_00031577	ENSG00000269713	NBPF9	0	0	0	0.075473	0.027279	0
TCONS_00012593	ENSG00000286185	AC242842.3	0	0.029467	0.016194	0.342517	0.084648	0.025925
TCONS_00033193	ENSG00000027869	SH2D2A	0	0	0.027705	0.097429	0	0
TCONS_00014389	ENSG00000162738	VANGL2	0	0	0	0.003429	0	0
TCONS_00034243	XLOC_013611	XLOC_013611	0	0	0	0.124369	0	0
TCONS_00034251	ENSG00000143156	NME7	0.080134	0.00325	0.007708	0.43033	0.155558	0.016844
TCONS_00034464	ENSG00000135845	PIGC	0	0.007048	0	0.168881	0	0.03018
TCONS_00017757	ENSG00000008118	CAMK1G	0	0	0.027178	0.123171	0	0
TCONS_00017712	ENSG00000076356	PLXNA2	0	0	0	0.023285	0	0
TCONS_00017803	ENSG00000143469	SYT14	0.018539	0	0	0.11779	0	0
TCONS_00018495	ENSG00000162817	C1orf115	0	0	0	0.135917	0	0
TCONS_00018911	XLOC_007706	XLOC_007706	0	0	0	0.107073	0	0.008422
TCONS_00019690	ENSG00000183780	SLC35F3	0	0	0	0.116449	0	0
TCONS_00019913	ENSG00000162885	B3GALNT2	0	0	0	0.025915	0	0.013328
TCONS_00039604	XLOC_016338	XLOC_016338	0	0	0	0.114917	0	0
TCONS_00039989	ENSG00000183049	CAMK1D	0	0	0	0.035263	0	0.005727
TCONS_00040789	ENSG00000150054	MPP7	0	0.004623	0	0.235322	0	0
TCONS_00042178	XLOC_017476	XLOC_017476	0.013822	0	0	0.105729	0	0
TCONS_00050985	ENSG00000213551	DNAJC9	0	0	0	0.058446	0	0.005368
TCONS_00044859	ENSG00000107521	HPS1	0	0	0	0.175091	0	0
TCONS_00053170	ENSG00000197748	CFAP43	0	0	0	0.026668	0	0
TCONS_00045471	ENSG00000148834	GSTO1	0	0	0	0.011413	0	0
TCONS_00045760	XLOC_019067	XLOC_019067	0.003663	0	0	0.031971	0	0
TCONS_00045824	XLOC_019096	XLOC_019096	0.020702	0.005752	0	0.129077	0.008536	0.026492
TCONS_00046616	ENSG00000286088	AC073585.2	0	0	0.010796	0.028111	0	0
TCONS_00046635	ENSG00000119965	C10orf88	0	0	0	0.030633	0	0
TCONS_00054377	ENSG00000203791	EEF1AKMT2	0.023643	0	0.021516	0.151497	0.018645	0.021553
TCONS_00056617	ENSG00000133794	ARNTL	0	0	0	0.027741	0	0
TCONS_00069463	XLOC_028526	XLOC_028526	0	0	0	0.040919	0	0.006485
TCONS_00069472	XLOC_028526	XLOC_028526	0	0	0.021801	0.080364	0.015301	0
TCONS_00070614	ENSG00000214872	SMTNL1	0	0	0.008151	0.035224	0	0
TCONS_00060105	ENSG00000126500	FLRT1	0.207194	0	0.02916	0.733293	0.102912	0.002617
TCONS_00061146	XLOC_025464	XLOC_025464	0	0.012543	0.02147	0.05255	0	0
TCONS_00074276	ENSG00000149256	TENM4	0.011831	0.011021	0	0.06186	0	0.004473
TCONS_00074567	XLOC_030382	XLOC_030382	0	0.006749	0	0.020704	0	0.004741
TCONS_00063118	ENSG00000150687	PRSS23	0.047307	0	0.026699	0.304184	0.010601	0.046386
TCONS_00075188	XLOC_030693	XLOC_030693	0	0	0	0.068426	0	0.001116
TCONS_00063795	ENSG00000165895	ARHGAP42	0.008569	0.002399	0.001694	0.145513	0.015517	0.000158
TCONS_00064241	XLOC_026686	XLOC_026686	0	0	0	0.028207	0	0
TCONS_00077546	ENSG00000149571	KIRREL3	0	0.050165	0	0.096078	0	0
TCONS_00078464	XLOC_031963	XLOC_031963	0	0	0	0.098957	0	0
TCONS_00090866	ENSG00000172572	PDE3A	0	0	0	0.086626	0	0
TCONS_00090888	ENSG00000111700	SLCO1B3	0	0	0	0.157993	0	0
TCONS_00083628	XLOC_033770	XLOC_033770	0	0.015108	0	0.159412	0	0.038098
TCONS_00095394	ENSG00000180881	CAPS2	0	0.031914	0	0.058411	0	0
TCONS_00096983	ENSG00000151131	C12orf45	0.044605	3.5e-05	0	0.395459	0	0
TCONS_00098003	XLOC_039319	XLOC_039319	0.009705	0.015849	0	0.053449	0	0
TCONS_00099661	ENSG00000072609	CHFR	0	0	0	0.102175	0	0
TCONS_00100043	XLOC_040083	XLOC_040083	0	0.027703	0.012486	0.123078	0	0.016722
TCONS_00105617	ENSG00000180332	KCTD4	0	0	0.080916	1.75391	0	0
TCONS_00106930	ENSG00000005812	FBXL3	0	0	0	0.017526	0	0
TCONS_00107396	ENSG00000139797	RNF113B	0	0.009253	0	0.121905	0.037843	0
TCONS_00107465	ENSG00000125245	GPR18	0.001104	0	0	0.050516	0	0
TCONS_00115927	XLOC_047127	XLOC_047127	0	0	0	0.022352	0	0.010857
TCONS_00116860	XLOC_047441	XLOC_047441	0	0	0	0.029541	0	0
TCONS_00117154	XLOC_047605	XLOC_047605	0	0	0	0.175647	0	0
TCONS_00111018	ENSG00000100592	DAAM1	0.000212	8.2e-05	0.000147	0.039307	2.3e-05	0
TCONS_00118271	ENSG00000154001	PPP2R5E	0	0	0	0.004208	0	0.002337
TCONS_00111690	ENSG00000182185	RAD51B	0	0.038435	0	0.09805	0	0
TCONS_00111947	ENSG00000197555	SIPA1L1	0.00511	0.014945	0.005482	0.1317	0.013857	0.026091
TCONS_00112764	XLOC_046010	XLOC_046010	0	0	0	0.10818	0	0
TCONS_00112826	XLOC_046064	XLOC_046064	0	0.007258	0	0.024108	0	0
TCONS_00124702	ENSG00000140297	GCNT3	0	0	0	0.015029	0	0
TCONS_00124837	ENSG00000171914	TLN2	0.005535	0.039929	0	0.256883	0	0
TCONS_00133486	XLOC_053843	XLOC_053843	0	0	0	0.126494	0	0
TCONS_00126858	ENSG00000197978	GOLGA6L9	0	0	0	0.284606	0	0
TCONS_00134259	XLOC_054175	XLOC_054175	0	0	0	0.053435	0	0
TCONS_00135918	ENSG00000140986	RPL3L	0.008246	0	0	0.091786	0	0.000979
TCONS_00145833	ENSG00000183454	GRIN2A	0	0.014337	0.012233	0.045457	0	0
TCONS_00138800	ENSG00000178188	SH2B1	0.00572	0	0	0.211448	0	0
TCONS_00140244	ENSG00000177200	CHD9	0	0	0	0.089213	0	0
TCONS_00149906	ENSG00000159714	ZDHHC1	0	0	0	0.266459	0	0
TCONS_00149907	ENSG00000159714	ZDHHC1	0	0	0	0.355778	0	0
TCONS_00141608	ENSG00000102904	TSNAXIP1	0	0	0	0.365071	0	0
TCONS_00143056	XLOC_056816	XLOC_056816	0	0	0	0.086165	0	0
TCONS_00151860	XLOC_059480	XLOC_059480	0	0.01294	0	0.04706	0	0
TCONS_00163235	ENSG00000186532	SMYD4	0	0	0	0.115957	0	0
TCONS_00165834	ENSG00000205212	CCDC144NL	0	0	0	0.004072	0	0
TCONS_00155059	ENSG00000109016	DHRS7B	0	0	0.010371	0.066309	7.7e-05	0.004212
TCONS_00166899	XLOC_064204	XLOC_064204	0	0	0.03242	0.062436	0	0
TCONS_00167048	ENSG00000274808	TBC1D3B	0	0	0	0.128901	0	0
TCONS_00157895	XLOC_061420	XLOC_061420	0	0	0	0.089249	0	0
TCONS_00158015	ENSG00000184361	SPATA32	0.005455	0	0.006464	0.117177	0	0
TCONS_00170123	XLOC_065189	XLOC_065189	0.001644	0	0	0.011565	0	0
TCONS_00159284	XLOC_061804	XLOC_061804	0	0	0	0.022047	0	0
TCONS_00160907	ENSG00000069188	SDK2	0	0	0	0.028582	0	0
TCONS_00161352	XLOC_062554	XLOC_062554	0	0	0	0.116626	0	0
TCONS_00162735	ENSG00000141568	FOXK2	0	0	0.00403	0.013515	0	0
TCONS_00174939	ENSG00000128789	PSMG2	0.007035	0.020064	0.029194	0.161138	0.002846	0.022006
TCONS_00175615	ENSG00000141384	TAF4B	0.002022	0.001784	0	0.033771	0	0.000251
TCONS_00175884	ENSG00000166974	MAPRE2	0.005178	0.006516	0	0.030616	0.006975	0
TCONS_00180183	XLOC_069124	XLOC_069124	0	0	0	0.027447	0	0
TCONS_00180876	XLOC_069418	XLOC_069418	0	0	0	0.012298	0	0
TCONS_00194402	ENSG00000087903	RFX2	0.010159	0	0.010894	0.103652	0.031846	0.004735
TCONS_00195528	ENSG00000205517	RGL3	0	0	0	0.021823	0	0
TCONS_00184556	ENSG00000213297	ZNF625-ZNF20	0	0	0.005684	0.054003	0	0
TCONS_00198049	XLOC_074641	XLOC_074641	0	0.006047	0	0.009964	0	0
TCONS_00189031	ENSG00000028277	POU2F2	0	0.00601	0.015582	0.047162	0	0
TCONS_00189186	ENSG00000242221	PSG2	0.003544	0	0	0.124493	0	0.011704
TCONS_00200261	ENSG00000176531	PHLDB3	0	0.006562	0.012387	0.076785	0.006621	0.006177
TCONS_00191121	ENSG00000235034	C19orf81	0	0	0	0.144412	0	0.052232
TCONS_00191443	ENSG00000198482	ZNF808	0	0	0.011536	0.025599	0	0
TCONS_00191482	ENSG00000189190	ZNF600	0	0	0	0.154884	0	0
TCONS_00192522	ENSG00000186230	ZNF749	0	0.035246	0	0.149605	0	0
TCONS_00203847	XLOC_076186	XLOC_076186	0	0	0	0.020444	0	0
TCONS_00220166	ENSG00000196208	GREB1	0	0	0	0.074874	0	0
TCONS_00221555	ENSG00000171055	FEZ2	0	0	0	0.0028	0	0.001339
TCONS_00222225	XLOC_083978	XLOC_083978	0	0	0	0.028599	0	0
TCONS_00222999	ENSG00000115464	USP34	0	0	0	0.00643	0	0
TCONS_00208872	XLOC_078434	XLOC_078434	0	0	0	0.070162	0	0
TCONS_00209658	ENSG00000174501	ANKRD36C	0	0	0	0.114812	0	0.018742
TCONS_00226270	XLOC_085576	XLOC_085576	0	0	0	0.075185	0	0
TCONS_00211501	ENSG00000088179	PTPN4	0.028997	0.025278	0.006037	0.54683	0.013717	0.00317
TCONS_00227896	ENSG00000152127	MGAT5	0	0	0	0.018976	0	0
TCONS_00214733	ENSG00000150722	PPP1R1C	0	0	0	0.057793	0	0
TCONS_00230861	XLOC_087757	XLOC_087757	0.016768	0.010175	0.008753	0.063746	0	0
TCONS_00230983	ENSG00000198130	HIBCH	0.013665	0.010476	0.006792	0.09708	0.014837	0
TCONS_00232523	XLOC_088450	XLOC_088450	0	0	0	0.062925	0	0
TCONS_00217370	XLOC_082000	XLOC_082000	0	0	0	0.003674	0	0
TCONS_00217638	XLOC_082206	XLOC_082206	0	0	0	0.029075	0	0.016621
TCONS_00217706	ENSG00000169031	COL4A3	0	0	0	0.073683	0	0
TCONS_00233848	XLOC_089048	XLOC_089048	0	0	0	0.04527	0	0
TCONS_00218681	ENSG00000124831	LRRFIP1	0	0	0	0.014557	0	0
TCONS_00240054	ENSG00000101333	PLCB4	0	0	0	0.130423	0	0
TCONS_00236040	ENSG00000215547	DEFB115	0	0	0	0.02481	0	0
TCONS_00242055	ENSG00000149633	KIAA1755	0	0	0	0.028161	0	0
TCONS_00243303	XLOC_093112	XLOC_093112	0	0	0	0.162589	0	0
TCONS_00238250	XLOC_090846	XLOC_090846	0	0	0	0.058077	0	0
TCONS_00238265	XLOC_090856	XLOC_090856	0	0.018082	0	0.029243	0	0
TCONS_00238295	ENSG00000019186	CYP24A1	0	0.060229	0	0.142224	0	0
TCONS_00243392	XLOC_093171	XLOC_093171	0	0	0	2.6e-05	0	0
TCONS_00238512	ENSG00000124164	VAPB	0.077627	0	0	0.554389	0	0
TCONS_00238626	ENSG00000087460	GNAS	0	0	0	0.053313	0	0
TCONS_00243707	ENSG00000179242	CDH4	0	0.004871	0	0.012245	0	0
TCONS_00247889	XLOC_095182	XLOC_095182	0	0	0	0.022446	0	0
TCONS_00248452	XLOC_095450	XLOC_095450	0	0	0	0.042338	0	0
TCONS_00251751	ENSG00000100003	SEC14L2	0	0	0	0.017752	0	0
TCONS_00256978	ENSG00000283900	TPTEP2-CSNK1E	0	0	0.015426	0.089605	0	0
TCONS_00252846	XLOC_097166	XLOC_097166	0	0	0	0.088622	0	0
TCONS_00257409	XLOC_098798	XLOC_098798	0	0	0	0.090359	0	0
TCONS_00270922	ENSG00000144455	SUMF1	0	0	0	0.202225	0	0
TCONS_00258764	ENSG00000168137	SETD5	0.023485	0	0	2.36273	0	0
TCONS_00259136	ENSG00000196639	HRH1	0	0.00164	0	0.067748	0	0
TCONS_00272098	XLOC_104459	XLOC_104459	0	0	0	0.020708	0	0
TCONS_00260919	XLOC_099978	XLOC_099978	0	0	0	0.043522	0.012415	0
TCONS_00263081	ENSG00000163681	SLMAP	0.004693	0	0.000617	0.439821	0	0.006303
TCONS_00263535	ENSG00000144747	TMF1	0	0	0.013827	0.101303	0	0.015908
TCONS_00277012	XLOC_106369	XLOC_106369	0	0	0.016171	0.114232	0	0
TCONS_00277077	XLOC_106426	XLOC_106426	0.030735	0	0	0.158419	0	0.006171
TCONS_00277892	XLOC_106849	XLOC_106849	0	0	0	0.096314	0	0
TCONS_00278107	ENSG00000145087	STXBP5L	0.000508	0	0	0.008607	0	0
TCONS_00279062	ENSG00000114686	MRPL3	0.006967	0.005515	0.03261	0.121557	0	0
TCONS_00279822	ENSG00000163710	PCOLCE2	0	0	0	0.02195	0	0
TCONS_00267711	XLOC_102749	XLOC_102749	0	0	0	0.017314	0	0
TCONS_00280354	XLOC_107860	XLOC_107860	0	0.052079	0	0.089094	0	0
TCONS_00280266	ENSG00000120742	SERP1	0	0	0	0.032813	0	0.000461
TCONS_00268123	ENSG00000197415	VEPH1	0.018863	0	0.023687	0.154925	0	0
TCONS_00268430	XLOC_103083	XLOC_103083	0	0	0	0.044744	0	0
TCONS_00280863	ENSG00000169255	B3GALNT1	0	0	0	0.018471	0	0
TCONS_00268881	ENSG00000144959	NCEH1	0.00516	0	0.017861	0.049983	0	0.005193
TCONS_00269388	ENSG00000176597	B3GNT5	0	0	0	0.006796	0	0
TCONS_00285659	ENSG00000163697	APBB2	0	0	0	0.019462	0	0
TCONS_00294869	ENSG00000174799	CEP135	0	0	0	0.073815	0	0
TCONS_00294919	ENSG00000171476	HOPX	0	0	0	0.132836	0	0
TCONS_00296036	XLOC_115044	XLOC_115044	0	0.037239	0	0.084322	0	0
TCONS_00287634	ENSG00000138639	ARHGAP24	0	0	0	0.019694	0	0
TCONS_00296574	ENSG00000138642	HERC6	0	0	0.00364	0.015175	0	0
TCONS_00297691	ENSG00000164100	NDST3	0	0	0	0.023184	0	0
TCONS_00289601	ENSG00000153130	SCOC	0.349246	0.612224	0.006203	2.32419	0	0
TCONS_00300059	ENSG00000218336	TENM3	0	0	0	0.105716	0	0
TCONS_00291430	ENSG00000218336	TENM3	0	0	0	0.080037	0	0
TCONS_00301012	ENSG00000124275	MTRR	0	0	0	0.089796	0	0
TCONS_00311973	ENSG00000112902	SEMA5A	0	0.100516	0.052872	0.345373	0	0
TCONS_00313525	ENSG00000113638	TTC33	0	0	0	0.038098	0	0.022689
TCONS_00313865	XLOC_123271	XLOC_123271	0	0	0	0.25913	0	0.070314
TCONS_00313869	XLOC_123275	XLOC_123275	0.018496	0.008985	0	0.096719	0.005419	0
TCONS_00314396	XLOC_123592	XLOC_123592	0	0.0673	0.0974	0.271751	0	0
TCONS_00314397	XLOC_123592	XLOC_123592	0	0	0	0.050925	0	0
TCONS_00314622	ENSG00000130449	ZSWIM6	0.008155	0.02508	0.012908	0.082567	0	0
TCONS_00304546	ENSG00000284762	AC022414.1	0	0.000566	0	0.002769	0	0
TCONS_00306717	XLOC_120160	XLOC_120160	0	0	0	0.028409	0	0.016893
TCONS_00319370	ENSG00000178913	TAF7	0.014076	0	0	2.59334	0.071615	0
TCONS_00319555	XLOC_126088	XLOC_126088	0	0	0.020392	0.043235	0	0
TCONS_00308694	XLOC_120930	XLOC_120930	0	0	0	0.011972	0	0
TCONS_00319659	XLOC_126151	XLOC_126151	0	0	0	0.024106	0	0
TCONS_00308710	ENSG00000183775	KCTD16	0	0.000637	0	0.088371	0	0.041361
TCONS_00321021	XLOC_126793	XLOC_126793	0.015989	0.016943	0	0.109387	0	0.022593
TCONS_00322529	ENSG00000137274	BPHL	0	0	0	0.000582	0	0
TCONS_00333590	ENSG00000164304	CAGE1	0	0	0	0.04683	0	0.010655
TCONS_00323367	ENSG00000010017	RANBP9	0.003116	0.01641	0	0.271272	0	0.003425
TCONS_00334226	ENSG00000124788	ATXN1	0	0	0	0.031111	0	0
TCONS_00334261	XLOC_133219	XLOC_133219	0	0	0	0.029651	0	0
TCONS_00323897	ENSG00000079691	CARMIL1	0	0	0	0.158115	0	0
TCONS_00324033	XLOC_128154	XLOC_128154	0	0	0	0.669394	0	0
TCONS_00326182	XLOC_128924	XLOC_128924	0	0	0	0.001907	0	0
TCONS_00337010	ENSG00000137218	FRS3	0	0	0	0.321387	0	0
TCONS_00329635	XLOC_130836	XLOC_130836	0.009732	0	0	0.165028	0.024945	0
TCONS_00340260	ENSG00000112290	WASF1	0	0.110029	0	0.357031	0	0.098092
TCONS_00340709	XLOC_136289	XLOC_136289	0	0	0	0.038306	0.02225	0
TCONS_00330230	XLOC_131139	XLOC_131139	0	0.035204	0.017969	0.153331	0.016278	0
TCONS_00340905	XLOC_136407	XLOC_136407	0	0.031398	0.012032	0.104048	0	0.012407
TCONS_00340896	XLOC_136403	XLOC_136403	3e-06	0.000845	0	0.056505	0	0
TCONS_00342314	XLOC_136999	XLOC_136999	0	0	0	0.170907	0	0.060819
TCONS_00342317	XLOC_136999	XLOC_136999	0	0	0	0.122855	0	0.06079
TCONS_00331506	XLOC_131839	XLOC_131839	0	0	0.019143	0.065495	0	0
TCONS_00331729	XLOC_131961	XLOC_131961	0	0	0	0.134728	0	0
TCONS_00342881	ENSG00000091844	RGS17	0	0	0	0.010849	0	0
TCONS_00343344	ENSG00000112541	PDE10A	0	0	0	0.085763	0	0
TCONS_00346188	ENSG00000175600	SUGCT	0	0	0	0.195237	0	0
TCONS_00346692	XLOC_138854	XLOC_138854	0	0	0	0.095502	0	0
TCONS_00347650	XLOC_139397	XLOC_139397	0	0	0	0.034643	0	0
TCONS_00358368	XLOC_143699	XLOC_143699	0	0	0	0.024167	0	0
TCONS_00348461	XLOC_139692	XLOC_139692	0	0	0	0.18476	0	0
TCONS_00358565	ENSG00000187391	MAGI2	0	0.016303	0.00273	0.034172	0	0
TCONS_00349342	ENSG00000242265	PEG10	0	0	0	0.315019	0	0
TCONS_00359657	ENSG00000221909	FAM200A	0	0	0	0.115852	0	0
TCONS_00359901	ENSG00000185955	C7orf61	0	0	0	0.002324	0	0
TCONS_00350323	ENSG00000173678	SPDYE2B	0.007919	0.09348	0	0.149918	0	0.006529
TCONS_00360506	ENSG00000135250	SRPK2	0.000582	0	0.002562	0.010304	0	0.000507
TCONS_00350486	ENSG00000128536	CDHR3	0	0	0	0.019648	0	0
TCONS_00360877	ENSG00000184903	IMMP2L	0.040184	0	0	0.265301	0	0.07187
TCONS_00360939	ENSG00000128512	DOCK4	0	0	0	0.085068	0	0
TCONS_00361309	XLOC_144758	XLOC_144758	0	0	0	0.031357	0	0
TCONS_00361622	XLOC_144888	XLOC_144888	0	0	0	0.091093	0	0
TCONS_00352474	ENSG00000006530	AGK	0	0	0	0.110703	0	0.060195
TCONS_00362686	ENSG00000170379	TCAF2	0	0.032517	0	0.163866	0.054141	0
TCONS_00353044	ENSG00000204946	ZNF783	0.00439	0	0	0.05947	0.012561	0.002515
TCONS_00372516	ENSG00000164741	DLC1	0.000859	0	0	0.011472	0	0.000705
TCONS_00364774	XLOC_146243	XLOC_146243	0.020937	0	0	0.06266	0	0.012112
TCONS_00372994	ENSG00000168490	PHYHIP	0	0	0	0.011181	0	0
TCONS_00365648	ENSG00000253457	SMIM18	0	0	0	0.032385	0	0
TCONS_00373824	ENSG00000215262	KCNU1	0	0.005576	0	0.081601	0.007192	0
TCONS_00367140	ENSG00000169122	FAM110B	0	0	0	0.05919	0	0
TCONS_00367710	XLOC_147497	XLOC_147497	0.013971	0	0.049673	0.134615	0	0
TCONS_00368201	XLOC_147768	XLOC_147768	0	0	0	0.047212	0	0
TCONS_00376034	XLOC_151444	XLOC_151444	0	0	0	3.6e-05	0	0
TCONS_00368261	ENSG00000164684	ZNF704	0	0	0	0.011305	0	0
TCONS_00368541	ENSG00000176571	CNBD1	0.009604	0	0	0.126885	0	0
TCONS_00369762	XLOC_148537	XLOC_148537	0.011098	0.011719	0	0.088373	0	0.013482
TCONS_00369906	XLOC_148655	XLOC_148655	0.010512	0	0.029929	0.151557	0	0
TCONS_00370154	XLOC_148778	XLOC_148778	0	0.015741	0.006389	0.053791	0.007028	0
TCONS_00379187	ENSG00000184156	KCNQ3	0	0.037218	0	0.071962	0	0
TCONS_00379716	XLOC_153168	XLOC_153168	0	0	0	0.069959	0	0
TCONS_00381077	XLOC_153602	XLOC_153602	0	0	0	0.007693	0	0
TCONS_00381651	XLOC_153885	XLOC_153885	0.015047	0	0	0.052059	0	0.012186
TCONS_00390501	XLOC_158095	XLOC_158095	0	0	0	0.092007	0	0
TCONS_00382132	XLOC_154292	XLOC_154292	0	0	0	0.049482	0	0
TCONS_00382145	XLOC_154292	XLOC_154292	0	0	0	0.147301	0	0
TCONS_00383821	ENSG00000187210	GCNT1	0	0.002887	0	0.015199	0	0
TCONS_00392477	XLOC_159143	XLOC_159143	0	0	0	0.029463	0	0
TCONS_00384136	XLOC_155261	XLOC_155261	0	0	0	0.09	0	0
TCONS_00392897	XLOC_159411	XLOC_159411	0.03926	0	0	0.139216	0	0.028679
TCONS_00393140	XLOC_159542	XLOC_159542	0	0	0	0.116584	0.057068	0
TCONS_00393775	ENSG00000106789	CORO2A	0.005253	0.032088	0.012227	0.099966	0	0
TCONS_00385286	XLOC_155828	XLOC_155828	0	0	0	0.034953	0	0
TCONS_00385979	ENSG00000198121	LPAR1	0	0	0	0.024736	0	0
TCONS_00386061	XLOC_156308	XLOC_156308	0	0	0	0.123513	0	0
TCONS_00394652	ENSG00000106868	SUSD1	0.004746	0	0.009071	0.943053	0.00555	0.070517
TCONS_00386123	XLOC_156348	XLOC_156348	0	0	0	0.034785	0	0
TCONS_00397963	ENSG00000169933	FRMPD4	0.002947	0.003934	0.001321	0.084961	0	0
TCONS_00398094	XLOC_161675	XLOC_161675	0	0	0	0.0601	0	0
TCONS_00398093	XLOC_161675	XLOC_161675	0	0	0	0.016213	0	0
TCONS_00405197	ENSG00000285602	AC097625.2	0	0	0	0.014582	0	0
TCONS_00405217	XLOC_165197	XLOC_165197	0	0	0	0.043847	0	0
TCONS_00399021	XLOC_162168	XLOC_162168	0	0	0	0.026772	0	0
TCONS_00406586	ENSG00000068400	GRIPAP1	0	0	0.011003	0.048497	0	0.007666
TCONS_00401321	XLOC_163273	XLOC_163273	0	0	0	0.096115	0	0
TCONS_00401317	ENSG00000165288	BRWD3	0.00309	0	0	0.043054	0	0.009496
TCONS_00401336	ENSG00000198157	HMGN5	0	0	0	0.162131	0	0
TCONS_00408553	XLOC_166916	XLOC_166916	0	0	0	0.050289	0	0
TCONS_00411551	XLOC_168443	XLOC_168443	0	0	0	0.015845	0	0
TCONS_00411554	XLOC_168446	XLOC_168446	0	0	0	0.007138	0	0
TCONS_00000706	XLOC_000517	XLOC_000517	0	0	0	0.042258	0.022454	0
TCONS_00000146	XLOC_000100	XLOC_000100	0.038041	0	0	0.110871	0	0
TCONS_00000925	XLOC_000671	XLOC_000671	0	0.012681	0	0.033108	0	0
TCONS_00000387	XLOC_000270	XLOC_000270	0.014431	0	0	0.071376	0	0
TCONS_00000314	XLOC_000209	XLOC_000209	0	0	0	93.6849	0	0
TCONS_00025310	XLOC_010173	XLOC_010173	0	0	0	0.030036	0	0
TCONS_00027696	XLOC_011057	XLOC_011057	0	0	0	0.150507	0	0
TCONS_00077087	XLOC_031472	XLOC_031472	0	0	0	0.061016	0	0
TCONS_00079939	XLOC_032500	XLOC_032500	0	0	0	0.097878	0	0
TCONS_00080848	XLOC_032860	XLOC_032860	0	0	0	0.03565	0	0
TCONS_00081508	ENSG00000177627	C12orf54	0	0	0	0.008613	0	0
TCONS_00094991	XLOC_038008	XLOC_038008	0	0.017183	0	0.052381	0	0
TCONS_00104615	XLOC_042344	XLOC_042344	0	0	0	0.131265	0	0
TCONS_00100887	XLOC_040494	XLOC_040494	0	0	0	0.14484	0	0
TCONS_00118218	XLOC_048109	XLOC_048109	0	0	0	0.094042	0	0
TCONS_00119417	XLOC_048582	XLOC_048582	0	0	0	0.023949	0	0
TCONS_00119418	XLOC_048582	XLOC_048582	0	0	0	0.016502	0	0
TCONS_00159423	XLOC_061866	XLOC_061866	0	0	0	0.014578	0	0
TCONS_00160991	ENSG00000178789	CD300LB	0	0	0	0.020915	0	0
TCONS_00175704	XLOC_067096	XLOC_067096	0	0.033823	0	0.08502	0	0
TCONS_00180509	XLOC_069261	XLOC_069261	0	0	0	0.005701	0	0
TCONS_00195125	XLOC_073761	XLOC_073761	0	0	0	0.055468	0	0
TCONS_00185143	ENSG00000105122	RASAL3	0	0	0	0.023551	0	0
TCONS_00220369	XLOC_083195	XLOC_083195	0	0	0	0.044818	0	0
TCONS_00223442	XLOC_084489	XLOC_084489	0	0	0	0.023834	0	0
TCONS_00210531	XLOC_079137	XLOC_079137	0	0	0	0.105749	0	0
TCONS_00211041	XLOC_079348	XLOC_079348	0.009639	0.039849	0.010111	0.099232	0	0
TCONS_00213220	XLOC_080316	XLOC_080316	0	0.014373	0	0.072359	0	0
TCONS_00231155	XLOC_087897	XLOC_087897	0	0.017884	0	0.092136	0.026625	0
TCONS_00241056	XLOC_092081	XLOC_092081	0	0	0	0.005055	0	0
TCONS_00237919	XLOC_090654	XLOC_090654	0	0	0	0.06396	0	0
TCONS_00257127	XLOC_098678	XLOC_098678	0	0	0	0.097821	0	0
TCONS_00260226	XLOC_099736	XLOC_099736	0	0	0	0.130875	0	0
TCONS_00272871	XLOC_104812	XLOC_104812	0.012774	0.030359	0	0.077496	0	0
TCONS_00267905	XLOC_102871	XLOC_102871	0	0	0	0.124675	0.002886	0
TCONS_00268489	XLOC_103133	XLOC_103133	0	0	0	0.028572	0	0.015029
TCONS_00281051	XLOC_108175	XLOC_108175	0	0	0	0.088327	0	0
TCONS_00286451	XLOC_110392	XLOC_110392	0	0	0	0.012048	0	0
TCONS_00286613	XLOC_110520	XLOC_110520	0	0	0	0.068127	0	0
TCONS_00297582	XLOC_115589	XLOC_115589	0	0	0	0.055047	0	0
TCONS_00297924	XLOC_115762	XLOC_115762	0	0	0	0.023412	0	0.003731
TCONS_00290439	XLOC_112253	XLOC_112253	0	0	0	0.01376	0	0
TCONS_00299906	XLOC_116730	XLOC_116730	0	0	0	0.101973	0	0
TCONS_00300543	XLOC_117068	XLOC_117068	0.011045	0	0.025913	0.16138	0	0
TCONS_00300897	XLOC_117231	XLOC_117231	0	0.030757	0	0.081381	0	0
TCONS_00312978	XLOC_122883	XLOC_122883	0	0	0.021513	0.055039	0	0
TCONS_00302691	XLOC_118211	XLOC_118211	0	0	0	0.094341	0	0
TCONS_00309981	XLOC_121475	XLOC_121475	0	0	0	0.027787	0	0.008099
TCONS_00327631	XLOC_129601	XLOC_129601	0	0	0	0.121129	0	0
TCONS_00327774	XLOC_129716	XLOC_129716	0	0	0	0.097117	0	0
TCONS_00345343	XLOC_138307	XLOC_138307	0.022427	0.026384	0	0.098463	0	0
TCONS_00355877	XLOC_142630	XLOC_142630	0	0	0	0.125605	0	0
TCONS_00356339	XLOC_142863	XLOC_142863	0	0	0	0.034175	0	0
TCONS_00352799	ENSG00000213215	OR2F1	0	0	0	0.005765	0	0
TCONS_00363479	XLOC_145686	XLOC_145686	0	0	0	0.029315	0	0
TCONS_00363606	XLOC_145741	XLOC_145741	0	0	0	0.039832	0	0
TCONS_00366229	XLOC_146747	XLOC_146747	0	0.051264	0	0.099123	0	0
TCONS_00374248	XLOC_150491	XLOC_150491	0	0	0	0.088999	0.00774	0
TCONS_00381368	XLOC_153789	XLOC_153789	0	0	0	0.090506	0	0
TCONS_00384099	XLOC_155225	XLOC_155225	0	0	0	0.116035	0	0
TCONS_00398455	XLOC_161808	XLOC_161808	0	0	0	0.049499	0	0
TCONS_00402846	XLOC_164113	XLOC_164113	0	0	0	0.116626	0	0
TCONS_00411224	XLOC_168271	XLOC_168271	0	0	0	0.015446	0	0
TCONS_00000291	XLOC_000195	XLOC_000195	0	0	0	0.021985	0	0.012125
TCONS_00000397	XLOC_000280	XLOC_000280	0	0	0.037256	0.114711	0	0
TCONS_00000697	XLOC_000513	XLOC_000513	0	0	0	0.036291	0	0
TCONS_00000988	XLOC_000724	XLOC_000724	0	0	0	0.097299	0	0

## Sheet: lncRNA_No UV_cluster 5
transcript_id	gene_id	gene_name	C_0	C_3	C_6	C_9	C_12	C_24
ENST00000446136	ENSG00000230368	FAM41C	0	0.003334	0	0	0.011621	0.005985
ENST00000443772	ENSG00000237491	AL669831.5	0	0	0.005937	0	0.012582	0
ENST00000582431	ENSG00000264293	RN7SL657P	0.031867	0.134383	0.01569	0.024918	0.259182	0.013924
ENST00000413332	ENSG00000236423	LINC01134	0.039838	0	0.114885	0	0.231715	0.017358
ENST00000641100	ENSG00000284716	AL034417.3	0	0	0	0	0.005496	0
ENST00000415330	ENSG00000231789	PIK3CD-AS2	0	0	0	0	0.240913	0
ENST00000428747	ENSG00000233485	AL031283.2	0.00368	0	0.005504	0.003368	0.016796	0
ENST00000447908	ENSG00000234593	KAZN-AS1	0	0	0	0.003194	0.011903	0
ENST00000633433	ENSG00000282740	AL021920.3	0	0	0	0	0.00977	0
ENST00000448791	ENSG00000226698	AL034380.1	0	0.015002	0.05095	0	0.115289	0
ENST00000481220	ENSG00000197989	SNHG12	0	0	0.032696	0	0.050007	0
ENST00000430320	ENSG00000223382	LINC01778	0.006129	0	0	0	0.048442	0
ENST00000430143	ENSG00000229044	AL451070.1	0	0	0.000195	0	0.00255	0
ENST00000640492	ENSG00000283973	AC099795.1	0	0	1e-06	0	0.007659	0
ENST00000431800	ENSG00000230615	AL139220.2	0	0	0	0	0.109093	0
ENST00000628123	ENSG00000230615	AL139220.2	0	0	0	0	0.012612	0
ENST00000424664	ENSG00000225767	AL049637.1	0	0	0	0.006866	0.015081	0
ENST00000439621	ENSG00000235563	AL445183.2	0	0	0	0	0.011179	0
ENST00000641177	ENSG00000260971	AC119674.1	0	0.003002	0	0	0.007571	0
ENST00000641838	ENSG00000260971	AC119674.1	0	0.000177	0	0	0.000727	0
ENST00000422198	ENSG00000241042	AL592431.2	0	0	0	0	0.022091	0
ENST00000634569	ENSG00000237352	LINC01358	0	0	0	0	0.09631	0.009445
ENST00000635571	ENSG00000237352	LINC01358	0	0.01617	0.025627	0.002214	0.071261	0.01453
ENST00000448344	ENSG00000231485	AL357078.1	0	0.002723	0.006906	0	0.078991	0
ENST00000426125	ENSG00000223653	AL078459.1	0.016528	0	0	0	0.043097	0.010594
ENST00000640794	ENSG00000284240	AC099062.1	0	0	0	0	0.03297	0
ENST00000494134	ENSG00000239794	RN7SL653P	0.00251	0	0	0	0.006924	0
ENST00000431770	ENSG00000224093	AL109613.1	0	7.7e-05	0.001894	0	0.002791	4.5e-05
ENST00000562538	ENSG00000260246	AC000032.1	0	0	0	0	0.042	0
ENST00000420168	ENSG00000226419	SLC16A1-AS1	0.004452	0.0083	0.004517	0.006434	0.045956	0.006405
ENST00000451149	ENSG00000226419	SLC16A1-AS1	0	0	0.033189	0	0.039871	0
ENST00000415065	ENSG00000244619	AC243547.1	0	0	0	0	0.01562	0
ENST00000595518	ENSG00000234222	LIX1L-AS1	0	0	0	0	0.004361	0
ENST00000612401	ENSG00000274415	AC241644.3	0	0	0	0	0.034358	0
ENST00000650785	ENSG00000237188	AC242426.2	0	0	0	0	0.155585	0
ENST00000531288	ENSG00000254913	AC239802.1	0	0	0	0	0.002671	0.00109
ENST00000560481	ENSG00000259357	AL590133.2	0	0	0.003522	0	0.004432	0
ENST00000445097	ENSG00000237975	FLG-AS1	0	0	0	0	0.007346	0
ENST00000453778	ENSG00000243613	AL513523.4	0.000112	0	0	0	0.002483	0.000349
ENST00000452809	ENSG00000235919	ASH1L-AS1	0	0	0	0	0.062631	0
ENST00000416416	ENSG00000231407	GORAB-AS1	0	0.006475	0	0.002329	0.035351	0
ENST00000566904	ENSG00000261817	AL390718.1	0	0	0	0	0.013114	0
ENST00000457852	ENSG00000224468	LAMC1-AS1	0	0	0	0	0.003067	0
ENST00000436905	ENSG00000237457	LINC01351	0	0.013049	0	0	0.027345	0
ENST00000644134	ENSG00000285280	AL390957.1	0	0	0	0	0.009428	0
ENST00000411143	ENSG00000223075	RN7SKP126	0	0	0	0	0.049435	0
ENST00000458139	ENSG00000223774	AL513217.1	0	0	0	0	0.039394	0
ENST00000504773	ENSG00000249007	AL691482.3	0.008922	0	0	0.003567	0.029196	0.006682
ENST00000417262	ENSG00000228288	PCAT6	0	1e-05	0	0.007649	0.049193	0.012792
ENST00000425161	ENSG00000237605	AL591846.2	0	0	0	0	0.000704	0
ENST00000496552	ENSG00000203684	IBA57-DT	0	0	0	0	0.045798	0
ENST00000446433	ENSG00000236244	AL122008.4	0	0	0	0	0.007122	0
ENST00000440494	ENSG00000226828	AL591885.1	0	0	0	0	0.004093	0.002004
ENST00000355358	ENSG00000197308	GATA3-AS1	0.005338	0	0	0.004692	0.066569	0.028371
ENST00000449462	ENSG00000234091	AL157392.2	0	0	0.006129	0	0.028355	0.010872
ENST00000451617	ENSG00000235410	AL157896.1	0	0	0	0	0.04845	0
ENST00000450742	ENSG00000230534	AL392046.1	0	0	0	0	0.012952	0
ENST00000457147	ENSG00000227540	AC016394.1	1e-06	0.081499	0.001919	1e-06	0.155205	5e-06
ENST00000609392	ENSG00000232342	AC022540.1	0	0	0	0	0.008681	0
ENST00000436608	ENSG00000227186	AC018511.1	0	0	0	0	0.024335	0
ENST00000491557	ENSG00000237149	ZNF503-AS2	0	0	0	0	0.006926	0
ENST00000412298	ENSG00000230091	TMEM254-AS1	0.001147	0	0	0	0.009612	0
ENST00000438082	ENSG00000225913	AL138767.3	0.001433	0.01195	0	0	0.036438	0.014829
ENST00000454174	ENSG00000232936	AL157400.2	0	0	0	0	0.003141	0
ENST00000451364	ENSG00000226688	ENTPD1-AS1	0.001723	0	0	0	0.017532	0
ENST00000454638	ENSG00000226688	ENTPD1-AS1	0	0	0	0	0.013114	0
ENST00000641708	ENSG00000235823	OLMALINC	0.048148	0.060294	0	0	0.159622	0.01971
ENST00000615609	ENSG00000274742	RF00017	0.00652	0	0	0	0.046017	0.004183
ENST00000434792	ENSG00000228261	ITPRIP-AS1	0	0	0	0	0.01816	0
ENST00000612008	ENSG00000277218	AL139123.1	0	0.004773	0.019872	0.015565	0.067352	0
ENST00000602756	ENSG00000251661	AC136475.1	0	0	0	0	0.064398	0
ENST00000534349	ENSG00000254860	TMEM9B-AS1	0	0	0	0	0.100239	0
ENST00000532989	ENSG00000283217	AC068205.1	0.007996	0	0	0	0.076355	0
ENST00000530042	ENSG00000255340	AC087276.3	0	0	0	0	0.00103	0.000369
ENST00000499194	ENSG00000244926	ALKBH3-AS1	0	0	0	0	0.002099	0
ENST00000531719	ENSG00000247675	LRP4-AS1	0	0	0	0	0.072934	0.021058
ENST00000577769	ENSG00000265559	RN7SL652P	0	0	0	0	0.069955	0.038013
ENST00000616527	ENSG00000251562	MALAT1	0	0	0	0	0.399582	0
ENST00000533945	ENSG00000255507	UVRAG-DT	0	0.002205	0	0	0.042182	0
ENST00000529298	ENSG00000255421	AP002340.1	0	0	0	0	0.035901	0
ENST00000530759	ENSG00000255135	AP002360.1	5e-06	0.000122	3e-06	0.000185	9.01541	1.5e-05
ENST00000527778	ENSG00000255100	AP003119.2	0.000726	0.001411	0.000832	0.000559	0.090618	0.001142
ENST00000528075	ENSG00000255100	AP003119.2	6e-05	2e-05	0	6.3e-05	0.000439	0.000122
ENST00000530190	ENSG00000254988	AP002498.1	0.000647	0	0	0.000828	0.003017	0
ENST00000531176	ENSG00000254705	AP000722.1	0	0	0	0	0.004604	0
ENST00000532992	ENSG00000255028	AP003049.2	0	0	0	0.007553	0.030703	0
ENST00000602900	ENSG00000270179	AP002840.2	0	0	0	0	0.006394	0
ENST00000629083	ENSG00000280502	RF00017	0	0	0	0	0.06336	0
ENST00000624557	ENSG00000279342	AP000866.6	0.006765	0.006279	0.002558	0.016669	0.091594	0.00637
ENST00000648143	ENSG00000285523	AC005906.3	0	0	0	0	3.8e-05	0
ENST00000382215	ENSG00000205885	C1RL-AS1	0	0	0	0.003585	0.044854	0
ENST00000539795	ENSG00000256101	AC092745.1	0	0	0	0	0.0064	0
ENST00000537659	ENSG00000226091	LINC00937	0	0	0	0	0.002046	0
ENST00000536029	ENSG00000247498	GPRC5D-AS1	0	0	0	0	0.101862	0.000111
ENST00000551974	ENSG00000257530	AC048344.1	0	0.009834	0	0	0.229478	0
ENST00000380601	ENSG00000205537	AC121338.1	0	0	0	0	0.022697	0
ENST00000595310	ENSG00000269514	AC024257.3	0	0	0	0	0.002879	0
ENST00000547395	ENSG00000257913	DDN-AS1	0	0	0	0	0.004307	0
ENST00000424518	ENSG00000228630	HOTAIR	0.025226	0.023028	0.087522	0.010018	0.175875	0.002741
ENST00000512427	ENSG00000250451	HOXC-AS1	0.015017	0.001046	0.000332	0.000376	0.047389	0.002993
ENST00000552053	ENSG00000258137	AC079313.2	0.004962	0	0	0	0.04107	0
ENST00000356672	ENSG00000224713	AC025165.1	0	0	0	0	0.004456	0.002167
ENST00000602327	ENSG00000269903	AC025165.4	0.027296	0	0.01013	0.024151	0.169314	0
ENST00000551844	ENSG00000258177	AC008149.1	0	0	0	0	0.047095	0
ENST00000546852	ENSG00000258240	AC002351.1	0.015291	0.073341	0.0607	0.008511	0.236603	0.010952
ENST00000549725	ENSG00000258034	AC012157.1	0.000367	0	0	0.033437	0.063603	0.006946
ENST00000614016	ENSG00000275467	AC083806.3	0.027881	0.006969	0.00939	0	0.099244	0.032194
ENST00000543848	ENSG00000256811	AC079360.1	0.002636	0.009198	0	0	0.015735	0
ENST00000543970	ENSG00000214650	AC073592.1	0	0	0	0	0.000273	0
ENST00000642407	ENSG00000275212	AC005186.1	0	0	0	0	0.01368	0
ENST00000540684	ENSG00000256128	LINC00944	0	0	0	0	0.034347	0.010534
ENST00000542763	ENSG00000256955	AC131009.2	0	0	0	0	0.040883	0
ENST00000452222	ENSG00000230641	USP12-AS2	0.00633	0	0	0.000579	0.025014	0
ENST00000432770	ENSG00000224511	LINC00365	0	0	0	0	0.065583	0
ENST00000437983	ENSG00000236711	SMAD9-IT1	0	0	0	0	0.008589	0
ENST00000637438	ENSG00000215483	LINC00598	0	0	0	0	0.003531	0
ENST00000606991	ENSG00000235903	CPB2-AS1	0.001229	0	0	0	0.006542	0
ENST00000422931	ENSG00000228444	AL137244.1	0.018795	0	0.001778	0	0.066599	0.010986
ENST00000454752	ENSG00000224356	AL356966.1	0	0.001327	0	0	0.004433	0
ENST00000426859	ENSG00000229373	LINC00452	0	0	0	0	0.016362	0
ENST00000454005	ENSG00000232487	RASA3-IT1	0	0.007372	0.007571	0.009907	0.031296	0
ENST00000621052	ENSG00000274827	LINC01297	0	0	0	0	0.006247	0
ENST00000557335	ENSG00000258471	AL161668.3	0	0	0	7.5e-05	0.000629	0
ENST00000399886	ENSG00000215256	DHRS4-AS1	0.000331	0	0	0	0.074459	0.024899
ENST00000555421	ENSG00000258525	AL049830.3	0	0	0	0	0.027329	0
ENST00000553396	ENSG00000259091	LINC00517	0	0	0	0	0.024324	0
ENST00000556620	ENSG00000258526	AL049828.1	0.00144	0.016229	0	0	0.042738	0
ENST00000648024	ENSG00000285830	AL109628.2	0	0	0	0	0.000832	0
ENST00000546784	ENSG00000257900	AL162632.1	0	0	0	0	0.034994	0
ENST00000554711	ENSG00000258616	LINC02303	0	0	0	0	0.037295	0
ENST00000554650	ENSG00000258413	AL158801.2	0	0	0	0	0.020159	0
ENST00000556390	ENSG00000258658	AL139021.2	0	0	0	0	0.003594	0
ENST00000648279	ENSG00000214770	AL161756.1	0	0	0	0	0.079363	0
ENST00000556919	ENSG00000258623	AL121820.1	0.000123	0	0	0	0.000566	0
ENST00000556316	ENSG00000258520	AL359317.1	0	0	0	0	0.018003	0
ENST00000557409	ENSG00000258957	AL359317.2	0.005724	0	0.011876	0	0.03817	0
ENST00000555972	ENSG00000258695	AC005225.3	0	0	0	0	0.009907	0
ENST00000637466	ENSG00000283627	AL137785.1	0.01608	0.049131	0.017439	0.022125	0.19716	0.030095
ENST00000557546	ENSG00000258717	AL132711.1	0	0	0	0	0.005463	0
ENST00000613733	ENSG00000262728	AC123768.3	0.017928	0.006218	0	0	0.051206	0
ENST00000622487	ENSG00000273855	AC020658.5	0.002303	0	0	0	0.02374	0
ENST00000558601	ENSG00000259364	AC013356.3	0	0	0	0	0.024221	0
ENST00000568861	ENSG00000174171	AC020659.1	0.004108	0	0	0.00538	0.043695	0.005488
ENST00000565685	ENSG00000261687	AC068724.1	0	0	0	0	0.02071	0
ENST00000559003	ENSG00000259520	AC051619.5	0	0	0	0	0.03512	0
ENST00000560647	ENSG00000259354	AC025580.2	0	0	0	0	0.010786	0
ENST00000560518	ENSG00000259577	CERNA1	0	0	0	0	0.005366	0
ENST00000610993	ENSG00000275417	AC068726.1	0	0	0	0	0.037132	0.011628
ENST00000558888	ENSG00000259370	AC103740.1	0	0	0	0	0.003653	0
ENST00000558905	ENSG00000259627	AC079328.2	0	0.012001	0	0	0.033244	0
ENST00000561310	ENSG00000259252	AC026583.1	0	0	0	0	0.010341	0
ENST00000568984	ENSG00000260173	AC020779.2	0	0	0	0	0.02564	0
ENST00000562634	ENSG00000259964	THSD4-AS1	0	0	0	0	0.004809	0
ENST00000562573	ENSG00000261423	TMEM202-AS1	0	0	0	0	0.043769	0
ENST00000560446	ENSG00000259652	AC090181.1	0	0	0	0	0.015155	0
ENST00000542197	ENSG00000256278	AC048382.1	0	0	0	0	0.005342	0
ENST00000556904	ENSG00000214432	VPS33B-DT	0	0	2e-06	0	0.000303	0.000122
ENST00000561215	ENSG00000259611	LINC01582	0	0	0	0	0.024417	0
ENST00000616032	ENSG00000247809	NR2F2-AS1	0	0	0	0	0.128979	0
ENST00000559755	ENSG00000259579	AC087762.1	0	0	0	0	0.016319	0
ENST00000615211	ENSG00000278456	AC015712.7	0	0	0	0	0.016525	0
ENST00000560351	ENSG00000259583	AC015712.2	0	0.000116	0	0	0.011833	0
ENST00000558696	ENSG00000259764	PCSK6-AS1	0	0	0	0	0.03235	0
ENST00000562027	ENSG00000260447	AC009065.3	0.001323	0	9.1e-05	0	0.006882	0.001846
ENST00000571449	ENSG00000263072	ZNF213-AS1	0	0	0	0	0.09159	0
ENST00000576250	ENSG00000261971	MMP25-AS1	0	0	0	0	0.009389	0
ENST00000548268	ENSG00000258354	AC138932.2	9.5e-05	0.000265	0.000175	0.00044	0.001806	0.00042
ENST00000552015	ENSG00000257391	AC126763.1	0	0.000116	0.000111	0.000255	0.002981	0.000166
ENST00000561762	ENSG00000260592	AC130456.3	0	0	0	0	0.033154	0
ENST00000565498	ENSG00000260510	AC004381.1	0	0.00158	0	0.003178	0.01156	0
ENST00000561471	ENSG00000261552	AC109460.4	0	0	0	0	0.01983	0
ENST00000570073	ENSG00000259810	AC002519.1	0	0	0	0	0.003758	0
ENST00000562536	ENSG00000261173	AC018845.3	0	0	0.002774	0.00031	0.024968	0
ENST00000564739	ENSG00000261369	AC007533.1	0	0	0	0	0.004087	0
ENST00000642667	ENSG00000285367	AC087564.1	0	0	0	0	0.003502	0
ENST00000564672	ENSG00000260545	AC026771.1	0	0	0	0.000168	0.00166	0
ENST00000602476	ENSG00000270049	AC009061.2	0	0	0.024546	0.015782	0.099666	0.028142
ENST00000563968	ENSG00000259833	AC138625.2	0	0	0	0	0.009141	0
ENST00000562507	ENSG00000214353	VAC14-AS1	0	0	0	0	0.002834	0
ENST00000562763	ENSG00000260593	AC009097.2	0	0	0	0	0.022283	0
ENST00000651631	ENSG00000260896	ARLNC1	0	0	0	0	0.011564	0
ENST00000565064	ENSG00000260228	AC009119.1	0	0	0	0	0.036372	0
ENST00000625056	ENSG00000279622	AC025280.2	0	0	0	0	0.003419	0
ENST00000648601	ENSG00000285527	AC136285.3	0	0	0	0	0.003459	0
ENST00000562873	ENSG00000261651	AC136285.2	0	0	0	0	0.01044	0
ENST00000378340	ENSG00000205015	LINC02138	0	0	0	0	0.007913	0
ENST00000563182	ENSG00000260659	AC009113.2	0	0	0	0	0.028416	0
ENST00000566898	ENSG00000260528	FAM157C	0	0	0.000619	0	0.054257	0
ENST00000649359	ENSG00000261879	AC087500.1	0	0	0.007813	0.010875	0.094398	0.006284
ENST00000577847	ENSG00000266677	AC087164.1	0	0	0	0	0.004626	0
ENST00000573168	ENSG00000262319	AC007952.6	0	0.001556	0	0	0.005888	0
ENST00000628484	ENSG00000281856	AC106017.2	0	0	0	0	0.017924	0
ENST00000631194	ENSG00000281856	AC106017.2	0	0	0	0	0.005228	0.003925
ENST00000564549	ENSG00000261033	AC005730.2	0.006655	0	0.021603	0	0.03545	0
ENST00000443508	ENSG00000233098	CCDC144NL-AS1	0	0	0.007027	0	0.012944	0
ENST00000439136	ENSG00000235530	AC087294.1	0	0	0	0	0.008443	0
ENST00000580360	ENSG00000265139	AC005899.3	0.00504	0	0	0	0.024019	0
ENST00000605738	ENSG00000270829	AC015849.2	0	0	0	0.007841	0.051312	0.024037
ENST00000614759	ENSG00000276707	AC243773.1	0.018413	0	0.012805	0	0.057675	0
ENST00000617867	ENSG00000274244	AC243585.1	0	0.0053	0.009898	0	0.030076	0
ENST00000575039	ENSG00000263293	AC068234.2	0	0	0	0	0.0017	0
ENST00000582389	ENSG00000263766	AC025682.1	3e-05	0	6.5e-05	0.00317	0.033785	0.002817
ENST00000578239	ENSG00000264701	AC018521.4	0	0	0	0	0.000198	0
ENST00000511627	ENSG00000253102	AC004707.1	0	0	0.002629	0	0.009002	0
ENST00000572848	ENSG00000263317	LINC01982	0	0	0	0	0.011924	0
ENST00000582564	ENSG00000265702	AC005821.1	0	0	0	0	0.036608	0
ENST00000582889	ENSG00000264513	AC006270.1	0	0	0	0	0.001098	0
ENST00000431604	ENSG00000226797	AC005828.1	0	0	0	0	0.025983	0
ENST00000577938	ENSG00000265218	AC103810.2	0.000712	0	0.000304	0	0.001989	0
ENST00000583916	ENSG00000264196	AC011120.1	0	0	0	0	0.027823	0
ENST00000647878	ENSG00000267123	SCAT1	0.000901	0.002209	0.000589	0.000702	0.032402	0.001121
ENST00000648052	ENSG00000267123	SCAT1	0	0	0.003442	0	0.015294	0
ENST00000591108	ENSG00000267491	AC100788.1	0	0	0	0	0.011104	0.000555
ENST00000571591	ENSG00000262662	AC127496.4	0	0	0.014167	0.020538	0.095219	0.006506
ENST00000573602	ENSG00000261924	AC127496.1	0.000842	0	0	0	0.010037	0
ENST00000570919	ENSG00000263321	AC024361.3	0	0	0	0	0.015687	0
ENST00000584431	ENSG00000265907	AP000919.2	0	0	0	0	0.013106	0.004509
ENST00000608162	ENSG00000273335	AP005432.2	0.003602	0.010022	0.003	0.016644	0.075524	0.028836
ENST00000583306	ENSG00000263821	AP005121.2	0.007157	0.007557	0	0	0.023827	0
ENST00000583138	ENSG00000263393	AC011825.2	0	0	0	0	0.008356	0
ENST00000586922	ENSG00000268573	AC011815.1	6e-05	0	0.00159	0	0.060885	0.000956
ENST00000586213	ENSG00000267193	AC023421.2	0	0	0.011038	0	0.014057	0
ENST00000591331	ENSG00000267677	AC016229.2	0	0	0	0	0.013196	0
ENST00000587138	ENSG00000267316	AC090409.2	0	0	0.00837	0.045395	0.113503	0
ENST00000606966	ENSG00000272473	AC006273.1	0.012324	0.074844	0.001594	0.020368	0.171518	0.038706
ENST00000592893	ENSG00000266978	AC011511.2	0.001326	0	0.001656	0	0.033074	1.6e-05
ENST00000615848	ENSG00000273733	AC011472.4	0.016871	0.117436	0.006685	0.023381	0.239501	0.036081
ENST00000589227	ENSG00000267646	AC008543.5	0	0	0	0	0.000598	0
ENST00000600160	ENSG00000214049	UCA1	0	0	0	0	0.010514	0
ENST00000596816	ENSG00000267904	AC024075.1	0	0	0	0	0.510638	0
ENST00000634568	ENSG00000282851	BISPR	0	0	0	0	0.020691	0
ENST00000599416	ENSG00000268650	AC005759.1	0	0.014837	0	0	0.107129	0
ENST00000597837	ENSG00000268938	AC005387.1	0.009901	0	0	0	0.035368	0
ENST00000590697	ENSG00000267481	AC011477.2	0	0	0	0	0.063197	0.038597
ENST00000593041	ENSG00000267130	AC008738.2	0	0	0	0	0.022021	0
ENST00000438770	ENSG00000226686	LINC01535	0	0.013827	0	0	0.030294	0
ENST00000595748	ENSG00000231412	AC005392.2	0	0	0.028389	0	0.04827	0
ENST00000592583	ENSG00000267144	AC067968.2	0	0	0	0	0.041183	0
ENST00000601033	ENSG00000268401	AC007785.3	0.01866	0	0	0	0.054044	0
ENST00000594027	ENSG00000268621	IGFL2-AS1	0	0.028989	0.01619	0.556865	1.07803	0.06428
ENST00000599645	ENSG00000268810	AC007193.1	0	0	0.019074	0	0.023423	0
ENST00000600716	ENSG00000269487	AC008635.1	0	0	0.006082	0	0.037754	0
ENST00000596488	ENSG00000268157	AC010524.1	0	0.012124	0	0.012052	0.03617	0
ENST00000599433	ENSG00000268686	AC010643.1	0	0	0	0	0.003216	0
ENST00000596451	ENSG00000268970	AC022150.2	0	0	0	0	0.019537	0
ENST00000429922	ENSG00000226696	LENG8-AS1	0	0	0	0	0.079247	0
ENST00000416022	ENSG00000226696	LENG8-AS1	0	0	0	0	0.102303	0
ENST00000593218	ENSG00000267421	AC005498.2	7.8e-05	0.000283	0.001253	0.000249	0.004678	0.000177
ENST00000600047	ENSG00000268713	AC005261.3	0.000741	0.008847	0.143383	0.045027	0.432381	0.016684
ENST00000596379	ENSG00000268307	LINC02560	0	0	0	0	0.000457	0
ENST00000413960	ENSG00000236106	AC010729.1	0	0	0	0	0.00601	0
ENST00000442864	ENSG00000229740	U91324.1	0	0.032604	0.009091	0.026995	0.092804	0.010227
ENST00000412712	ENSG00000235092	ID2-AS1	0	0	0	0	0.036248	0
ENST00000439547	ENSG00000242282	AC108488.1	5e-06	0	1e-06	1e-06	0.128175	4e-06
ENST00000429878	ENSG00000224184	MIR3681HG	0	0	0	0	0.03761	0
ENST00000412294	ENSG00000224184	MIR3681HG	0.002803	0	0	0	0.014016	0.002972
ENST00000450916	ENSG00000224184	MIR3681HG	0	0	0	0	0.088152	0
ENST00000416453	ENSG00000234945	GTF3C2-AS1	1.5e-05	0	0	0	0.010947	0
ENST00000455424	ENSG00000233862	AC016907.2	0	0.002312	0	0	0.011741	0
ENST00000413479	ENSG00000227028	SLC8A1-AS1	0	0	0	0	0.033825	0
ENST00000427054	ENSG00000234362	LINC01914	0	0.001312	0	0	0.003182	0
ENST00000433475	ENSG00000228108	AC092839.1	0.013818	0.029391	0	0	0.055011	0
ENST00000626226	ENSG00000240401	AC012358.3	0	0	0	0	0.035214	0.016579
ENST00000609422	ENSG00000273302	AC016747.3	0	0	0	0	0.013266	0
ENST00000416111	ENSG00000226622	AC092155.1	0	0	0	0	0.018001	0
ENST00000425966	ENSG00000229839	AC018462.1	0	0	0	0	0.007963	0
ENST00000529783	ENSG00000225439	BOLA3-AS1	0	0	0.000883	0	0.094394	0.059429
ENST00000418204	ENSG00000204792	LINC01291	0	0	0	0	0.02045	0
ENST00000433581	ENSG00000231134	TCF7L1-IT1	0	0	0	0	0.047105	0
ENST00000643743	ENSG00000222041	CYTOR	0	0	0	0	0.076144	0
ENST00000441075	ENSG00000172965	MIR4435-2HG	0.006515	0	0	0	0.018566	0
ENST00000446401	ENSG00000228857	AC104653.1	0	0	0	0	0.055123	0
ENST00000627378	ENSG00000235066	AC009303.2	0	0	0	0	0.012165	0
ENST00000444649	ENSG00000231890	DARS-AS1	0	0	0	0	0.004357	0
ENST00000422799	ENSG00000232377	AC016910.1	0	0	0.008169	0	0.009918	0
ENST00000626239	ENSG00000226674	TEX41	0	0	0	0	0.008198	0
ENST00000427278	ENSG00000238057	ZEB2-AS1	0	0	0.001441	0	0.007427	0.003851
ENST00000420020	ENSG00000223642	AC008277.1	0	0	0	0	0.000126	0
ENST00000431341	ENSG00000236283	AC019197.1	0	0	0	0	0.002919	0
ENST00000628085	ENSG00000236283	AC019197.1	0	0	0	0	0.010717	0
ENST00000418106	ENSG00000235934	AC007405.2	0	0	0	0	0.041002	0
ENST00000430416	ENSG00000213963	AC019080.1	0	0	0	0	0.026843	0
ENST00000604571	ENSG00000237298	TTN-AS1	0	0	0	0	0.011706	0
ENST00000588257	ENSG00000237298	TTN-AS1	0	0	0	0	0.007204	0
ENST00000631232	ENSG00000226312	CFLAR-AS1	0	0	0	0	0.002225	0
ENST00000410564	ENSG00000222496	RN7SKP200	0	0	0	0	0.007651	0
ENST00000452057	ENSG00000229127	AC007038.1	0	0	0	0	0.024719	0
ENST00000419922	ENSG00000235770	LINC00607	0	0	0	0	0.02886	0
ENST00000429882	ENSG00000227432	AC053503.1	0	0	0	0	0.018186	0
ENST00000625550	ENSG00000225963	AC009950.1	0	0	0	0	0.019429	0
ENST00000626428	ENSG00000225963	AC009950.1	0	0	0.01748	0	0.034389	0
ENST00000427835	ENSG00000228422	LINC00687	0.001529	0	0	0	0.004825	0
ENST00000448859	ENSG00000232900	AL050403.1	0	0	0	0	0.010183	0
ENST00000424021	ENSG00000175170	FAM182B	0	0	0	0	0.016299	0
ENST00000448580	ENSG00000231081	AL078587.1	0	0	0	0	0.000968	0
ENST00000565572	ENSG00000260536	AL035071.2	0	0	0.006597	0	0.015128	0
ENST00000450129	ENSG00000234139	AL035420.1	0	0	0	0	0.004159	0
ENST00000652204	ENSG00000225806	AL121917.1	0.00081	0.008226	0.000224	8.5e-05	0.067366	0.000105
ENST00000623394	ENSG00000277067	CU634019.1	0	0	0	0	0.000394	0
ENST00000622995	ENSG00000278932	CR381653.1	0.017322	0	0	0	0.129851	0
ENST00000630354	ENSG00000281903	LINC02246	0.000891	0	0	0	0.006185	0.003225
ENST00000625278	ENSG00000281903	LINC02246	0	0	0.011547	0.021198	0.046706	0
ENST00000419952	ENSG00000215386	MIR99AHG	0	0	0	0	0.120829	0
ENST00000602654	ENSG00000269950	AP000962.1	0.00018	0	0	0	0.027148	0
ENST00000447125	ENSG00000215533	LINC00189	0	5.3e-05	0	0	0.023854	0
ENST00000629969	ENSG00000281383	FP671120.5	0	0	0	0	0.00504	0
ENST00000428667	ENSG00000233818	AP000695.2	0.006216	0	0	0	0.201645	0.003741
ENST00000412906	ENSG00000237232	ZNF295-AS1	0	0	0.046615	0	0.091669	0
ENST00000453395	ENSG00000225255	AP000527.1	0	0	0	0	0.048431	0.008722
ENST00000614596	ENSG00000276095	FAM230F	0	0	0	0	0.002125	0
ENST00000628442	ENSG00000236540	AC006547.1	0	0	0.012699	0	0.019079	0
ENST00000415503	ENSG00000236540	AC006547.1	0.003826	0	0	0	0.019779	0.008257
ENST00000623980	ENSG00000279110	AL022323.4	0	0.000317	0	0	0.001594	0
ENST00000450963	ENSG00000244625	MIATNB	0	0	0.020263	0	0.263846	0
ENST00000435162	ENSG00000244625	MIATNB	0	0.038368	0.042964	0	0.193823	0.002467
ENST00000609073	ENSG00000273176	AL008635.1	0	0	0.000814	0	0.054382	0
ENST00000625157	ENSG00000279652	Z82217.1	0	0	0.000524	0	0.002507	0
ENST00000609322	ENSG00000272694	Z94160.2	0	0	0	0	0.018197	0
ENST00000420172	ENSG00000235246	AL020993.1	0	0	0	0	0.000353	0
ENST00000652123	ENSG00000224271	AL117329.1	0	0	0	0	0.006213	0
ENST00000474544	ENSG00000235978	AC018816.1	0.002886	0	0	0	0.01804	0
ENST00000437047	ENSG00000224884	AC034187.1	0	0	0	0	0.023194	0.00146
ENST00000449023	ENSG00000235830	SRGAP3-AS4	0	0.005984	0	0	0.027834	0
ENST00000480904	ENSG00000206573	THUMPD3-AS1	4e-06	0.000545	0.001441	0.002535	0.008711	0.001547
ENST00000628785	ENSG00000228242	AC093495.1	0	0	0	0.002174	0.020976	0
ENST00000630173	ENSG00000228242	AC093495.1	0	0	0	0	0.000148	0
ENST00000494875	ENSG00000249786	EAF1-AS1	0	0	0	0	0.00024	0
ENST00000430018	ENSG00000233153	UBE2E2-AS1	0	0	0	0	0.01208	0
ENST00000626662	ENSG00000203506	RBMS3-AS2	0	0	0	0	0.008042	0
ENST00000475395	ENSG00000251224	CNOT10-AS1	0	0	0	0	0.019083	0
ENST00000607832	ENSG00000272149	AC112211.1	0	0	0	0	0.032327	0
ENST00000631311	ENSG00000232354	VIPR1-AS1	0	0	0	0	0.007016	0
ENST00000625717	ENSG00000232354	VIPR1-AS1	0	0	0	0	0.024118	0.003074
ENST00000421735	ENSG00000232352	SEMA3B-AS1	0	0	0	0	0.000316	0
ENST00000468961	ENSG00000240549	THOC7-AS1	0	0	0	0	0.008844	0
ENST00000487928	ENSG00000241587	RN7SL482P	0	0	0	0	0.00669	0
ENST00000597366	ENSG00000244513	AC109587.1	0	0	0	0	0.012302	0
ENST00000473031	ENSG00000241665	RN7SL418P	0	0	0	0	0.013162	0
ENST00000478239	ENSG00000241593	AC099542.1	0	0.002126	0	0	0.013818	0
ENST00000466292	ENSG00000241155	ARHGAP31-AS1	0.020052	0.005378	0	0	0.083196	0.011921
ENST00000469070	ENSG00000242622	AC092910.3	0	0	0	0.003859	0.07985	0
ENST00000498297	ENSG00000231305	AC112484.1	0	0	0	0	0.004992	0.001161
ENST00000603884	ENSG00000271270	TMCC1-AS1	0.015201	0	0.021525	0	0.069321	0
ENST00000474250	ENSG00000239213	NCK1-DT	0.008194	0.00373	0.084695	0.024935	0.394858	0.027226
ENST00000491932	ENSG00000243415	AC107021.1	0	0	0	0	0.017075	0
ENST00000469268	ENSG00000243273	AC020636.1	0	0	0	0	0.015834	0
ENST00000471093	ENSG00000240137	ERICH6-AS1	0	0	0	0	0.015377	0
ENST00000487827	ENSG00000244268	AC117394.2	0	0	0	0	0.015776	0
ENST00000469301	ENSG00000239219	AC008040.1	0	0	0	0.011252	0.033876	0
ENST00000451742	ENSG00000237978	KCNMB2-AS1	0	0	0	0	0.026096	0
ENST00000456447	ENSG00000163915	IGF2BP2-AS1	0	0.000888	0	0	0.013288	0
ENST00000627268	ENSG00000197099	AC068631.1	0	0	0	0	0.008122	0
ENST00000354642	ENSG00000197099	AC068631.1	0	0	0	0	0.002357	0
ENST00000449623	ENSG00000228804	AC072022.1	0	0	0	0	0.007079	0
ENST00000626569	ENSG00000242086	MUC20-OT1	0.000647	0	0	0.001063	0.018536	0
ENST00000594715	ENSG00000242086	MUC20-OT1	0	0	0	0	0.028971	0
ENST00000629686	ENSG00000242086	MUC20-OT1	0	0	0	0	0.006341	0
ENST00000597982	ENSG00000242086	MUC20-OT1	0	0	0	0	0.021917	0
ENST00000627609	ENSG00000242086	MUC20-OT1	0	0	0.00584	0	0.016147	0
ENST00000597871	ENSG00000242086	MUC20-OT1	0	0	0	0	0.027743	0
ENST00000598992	ENSG00000242086	MUC20-OT1	0.000801	0	0	0	0.024133	4.1e-05
ENST00000425425	ENSG00000242086	MUC20-OT1	0.015665	0.005485	0.010177	0.022272	0.068793	0.007591
ENST00000357591	ENSG00000196810	CTBP1-DT	0.001146	0.001538	0.002715	0.000935	0.106064	0.001154
ENST00000512873	ENSG00000249699	LINC02261	0	0	0	0	0.003745	0
ENST00000513127	ENSG00000250906	AC131953.1	0	0	0	0	0.00022	0
ENST00000507190	ENSG00000251173	UCHL1-AS1	0	0	0	0	0.010548	0
ENST00000508563	ENSG00000248143	LINC02383	0	0.011068	0	0	0.040151	0
ENST00000651845	ENSG00000180769	WDFY3-AS2	0	0.002069	0	0	0.020846	0.011272
ENST00000651964	ENSG00000180769	WDFY3-AS2	0	0.04392	0	0	0.156259	0
ENST00000610572	ENSG00000274238	AC097478.2	0	0	0	0	0.020415	0
ENST00000615968	ENSG00000277695	AC097478.4	0	0	0	0	0.005294	0
ENST00000510212	ENSG00000234492	RPL34-AS1	0	0	0	0	0.011493	0
ENST00000651728	ENSG00000286136	AC107071.1	0	0	0.02587	0	0.031884	0
ENST00000513255	ENSG00000248694	AC079226.1	0	0	0	0	0.022683	0
ENST00000457303	ENSG00000232648	AC107214.1	0	0	0.00594	0	0.083516	0
ENST00000623673	ENSG00000221990	EXOC3-AS1	0.000309	0.000129	0.00015	0.00021	0.014706	0.000525
ENST00000652260	ENSG00000247516	MIR4458HG	0	0	0	0	0.008759	0
ENST00000502001	ENSG00000247516	MIR4458HG	0.016163	0.007222	0.005893	0.011261	1.50344	0.006028
ENST00000563101	ENSG00000261360	AC010491.1	2.3e-05	7.3e-05	0.002169	0.001068	0.008579	0.000128
ENST00000648234	ENSG00000249937	LINC02223	0	0	0	0	0.003961	0
ENST00000503488	ENSG00000249359	AC093274.1	0	0.001526	0.00162	0.001917	0.007696	0
ENST00000522350	ENSG00000253766	AC091946.1	0	0	0	0	0.015473	0
ENST00000512067	ENSG00000250337	PURPL	0	0	0	0	0.016294	0
ENST00000512329	ENSG00000250155	AC008957.1	0	0	0.02117	0	0.030817	0
ENST00000503179	ENSG00000251141	MRPS30-DT	0.003816	0	0.003896	0.003221	0.03229	0
ENST00000651719	ENSG00000285999	AC025442.2	0	0.060167	0	0	0.128677	0
ENST00000504129	ENSG00000248664	AC010273.1	0	0	0.007844	0	0.045014	0
ENST00000506717	ENSG00000249293	AC091868.2	0	0	0	0	0.006648	0.00442
ENST00000512650	ENSG00000250615	AC008581.1	0	0	0	0	0.027028	0
ENST00000645459	ENSG00000250802	ZBED3-AS1	0	0	0	0	0.006659	0
ENST00000647045	ENSG00000250802	ZBED3-AS1	0	0	0	0	0.029358	0
ENST00000643974	ENSG00000250802	ZBED3-AS1	0	8.4e-05	0	0	0.010853	0
ENST00000644460	ENSG00000250802	ZBED3-AS1	0	0	0	0	0.03512	0
ENST00000514114	ENSG00000250802	ZBED3-AS1	0	0	0	0	0.052985	0
ENST00000511100	ENSG00000248309	MEF2C-AS1	0	0.001541	0	0	0.010561	0
ENST00000504636	ENSG00000247828	TMEM161B-AS1	0.022937	0.004144	0.000512	0.025016	0.337369	0.014443
ENST00000630823	ENSG00000281357	ARRDC3-AS1	0.006968	0.00079	0	0.005108	0.1312	0.013249
ENST00000499025	ENSG00000247877	AC021086.1	0	0	0.006758	0	0.023564	0
ENST00000639976	ENSG00000283897	AC011416.3	0	0	0	0	0.050455	0.033319
ENST00000629903	ENSG00000230612	AC004039.1	0	0	0	0	0.028631	0
ENST00000509372	ENSG00000250167	AC034206.1	0	0	0	0	0.044002	0
ENST00000625128	ENSG00000272154	AC244517.2	0	0	0	0	0.016864	0
ENST00000507318	ENSG00000250072	SH3TC2-DT	0	0	0	0	0.004801	0
ENST00000486087	ENSG00000241963	RN7SL655P	0.006963	0.015822	0	0	0.064908	0.023753
ENST00000517299	ENSG00000253955	AC008663.2	0	0	0	0	0.008787	0.004959
ENST00000512508	ENSG00000250900	AC008443.6	0	0	0	0	0.015079	0
ENST00000431369	ENSG00000225775	AL137220.1	0	0	0	0	0.012757	0
ENST00000420389	ENSG00000228478	AL138885.2	0	0	0	0	0.020077	0
ENST00000437559	ENSG00000229896	AL157373.2	0	0	0	0	0.234726	0
ENST00000648816	ENSG00000285703	AL021918.3	0	0	0	0	0.019224	0
ENST00000602861	ENSG00000231074	HCG18	0	0	0	0	0.034336	0
ENST00000455957	ENSG00000270604	HCG17	0.011962	0.022505	0.06176	0.030025	0.144929	0.000218
ENST00000383331	ENSG00000206344	HCG27	0	0	0	0	0.011814	0
ENST00000458296	ENSG00000204261	PSMB8-AS1	0	0	0.005097	0	0.014865	0
ENST00000454812	ENSG00000234753	FOXP4-AS1	0	0	0	0	0.001886	0
ENST00000422059	ENSG00000237686	AL109615.3	0	0.005716	0	0	0.025318	0.005163
ENST00000604014	ENSG00000270761	AL355353.1	0.016324	0.028169	0.015439	0.021126	0.426269	0.020069
ENST00000474641	ENSG00000271218	AL033384.2	0	0	0	0	0.02045	0
ENST00000641671	ENSG00000225096	AL445250.1	0	0	0	0	0.015051	0
ENST00000589263	ENSG00000226803	ZNF451-AS1	0	0	0.005018	0	0.031762	0.013523
ENST00000436876	ENSG00000228624	HDAC2-AS2	0	0	0	0	0.002989	0
ENST00000419061	ENSG00000226149	AL356124.1	0	0	0	0	0.038782	0
ENST00000646293	ENSG00000231426	FILNC1	0	0	0	0	0.004528	0
ENST00000433442	ENSG00000236591	AL357992.1	0.052203	0.069124	0.024978	0	0.237848	0.0193
ENST00000461853	ENSG00000243373	RN7SL173P	0	0	0	0.031516	0.053545	0.011896
ENST00000411838	ENSG00000234361	AL391863.2	0	0	0	0	0.003955	0
ENST00000367072	ENSG00000203711	C6orf99	0	0	0	0	0.002318	0
ENST00000643132	ENSG00000271913	AL035530.2	0	0	0.003417	0	0.011662	0.004742
ENST00000642829	ENSG00000285492	AL356417.3	0	0	0	0	0.000826	0
ENST00000650230	ENSG00000285726	AL031121.3	0	0	0.003299	0	0.004712	0
ENST00000425438	ENSG00000198221	AFDN-DT	0	0	0	0	0.033291	0
ENST00000639380	ENSG00000283991	AC017000.1	0	0	0	0	0.002217	0
ENST00000604183	ENSG00000271185	AC007029.1	0	0	0	0	0.016434	0
ENST00000413042	ENSG00000226816	AC005082.1	0	0.003683	0	0	0.00929	0
ENST00000455963	ENSG00000234336	JAZF1-AS1	0.006612	0	0	0	0.048188	0
ENST00000444500	ENSG00000234336	JAZF1-AS1	0	0	0	0	0.002848	0
ENST00000436056	ENSG00000229628	AC073115.1	0	0	0	0	0.010317	0
ENST00000466169	ENSG00000240347	RN7SL35P	0	0	0	0	0.001198	0
ENST00000452050	ENSG00000237819	AC002454.1	0	0.002807	0.000987	0	0.164715	0
ENST00000424523	ENSG00000237819	AC002454.1	0	0	0.018984	0	0.041812	0
ENST00000417881	ENSG00000236197	AC002429.2	0.006134	0.006322	0	0	0.016338	0
ENST00000392471	ENSG00000225807	AC069281.1	0	0	0	0	0.004392	0
ENST00000476569	ENSG00000242154	AC004884.2	0	0	0	0	0.004933	0
ENST00000490856	ENSG00000243797	AC004917.1	0	0.001302	0	0	0.004076	0
ENST00000447785	ENSG00000234520	AC018464.1	0	0	0	0	0.00763	0
ENST00000421965	ENSG00000243220	AC006159.2	0	0	0	0	0.005084	0
ENST00000397551	ENSG00000214106	PAXIP1-AS2	0.015651	0.000369	0.005108	0.006274	0.301988	0.017526
ENST00000474963	ENSG00000216895	AC009403.1	0	0	0	0	0.050204	0
ENST00000606573	ENSG00000215374	FAM66B	0.004242	0	0	0.007897	0.117799	0.007861
ENST00000520017	ENSG00000254340	AC022784.5	0	0	0	0	0.01182	0
ENST00000648540	ENSG00000248538	AC022784.1	0	0	0	0	0.068531	0
ENST00000521541	ENSG00000253642	AF279873.3	0	0	0	0	0.007937	0
ENST00000636550	ENSG00000253688	AC026904.2	0.000944	0	0	0	0.006858	0
ENST00000530725	ENSG00000251396	LINC01301	0	0	0	0	0.017943	0
ENST00000521762	ENSG00000254349	MIR2052HG	0	0	0	0	0.012863	0
ENST00000533978	ENSG00000254538	AC027018.1	0	0	0.01034	0	0.017923	0
ENST00000522302	ENSG00000254266	PKIA-AS1	0	0	0	0	0.00497	0
ENST00000562577	ENSG00000260493	AC011773.4	0	0	0	0	0.024924	0
ENST00000524166	ENSG00000251136	AF117829.1	0.038025	0.043191	0	0	0.173463	0.005733
ENST00000524003	ENSG00000253738	OTUD6B-AS1	0.146085	0.0634	0.014161	0.246159	0.612675	0.049614
ENST00000365490	ENSG00000202360	RN7SKP249	0.016203	0.035157	0	0.007266	0.076261	0
ENST00000523121	ENSG00000253679	AP001330.2	0	0	0	0	0.010718	0
ENST00000517739	ENSG00000253619	AC068413.1	0	0	0	0	0.019517	0.008429
ENST00000520576	ENSG00000204949	FAM83A-AS1	0	0	0	0	0.00779	0
ENST00000533496	ENSG00000255491	AC100858.3	0	0	0	0	0.019689	0
ENST00000652367	ENSG00000286010	AC108925.1	0	0.001802	0	0	0.004546	0
ENST00000643428	ENSG00000253438	PCAT1	0	0	0	0	0.003108	0
ENST00000644570	ENSG00000253438	PCAT1	0	0	0	0	0.003115	0
ENST00000519880	ENSG00000253438	PCAT1	0.000686	0.000161	0	0	0.041102	0
ENST00000520606	ENSG00000254197	AC011676.3	0	0	0	0	0.007733	0
ENST00000530600	ENSG00000254859	AC067930.3	0	0.019715	0	0	0.06327	0.019741
ENST00000519852	ENSG00000253716	MINCR	0.030506	0.087789	0	0	0.305767	0
ENST00000529377	ENSG00000255456	AC084125.3	0	0	0	0	0.025879	0
ENST00000423112	ENSG00000232104	RFX3-AS1	0	0	0	0	0.047316	0
ENST00000436786	ENSG00000234840	LINC01239	0	0	0	0.004868	0.051426	0
ENST00000471800	ENSG00000243136	RN7SL22P	0	0	0	0	0.021975	0
ENST00000544644	ENSG00000228189	AL592486.1	0	0	0	0	0.009031	0
ENST00000440009	ENSG00000226609	AL390067.1	0	0	0	0	0.047684	0.007596
ENST00000423546	ENSG00000225684	FAM225B	0	0	0.002091	0.009866	0.064531	0.02907
ENST00000644180	ENSG00000284977	AL160272.1	0	0.000537	0.000544	0	0.002707	0
ENST00000561961	ENSG00000261094	AC007066.2	0	0	0	0	0.032136	0
ENST00000609303	ENSG00000272593	AL359091.3	0.021407	0.023448	0.304448	0.12416	0.840055	0.067041
ENST00000371813	ENSG00000204011	COL5A1-AS1	0	0	0	0	0.00635	0
ENST00000623196	ENSG00000180539	C9orf139	0	0	0	0	0.001269	0
ENST00000650538	ENSG00000285756	BX890604.2	4.4e-05	0	7.4e-05	2.9e-05	0.052725	0.000233
ENST00000455438	ENSG00000226484	AL606516.1	0	0	0	0	0.016435	0
ENST00000616060	ENSG00000277721	RF00017	0	0	0	0	0.004407	0
ENST00000652540	ENSG00000230590	FTX	0	0	0	0	0.022748	0
ENST00000464966	ENSG00000265260	RN7SL74P	0	0	0	0	0.035095	0
ENST00000439759	ENSG00000236256	DIAPH2-AS1	0	0	0	0	0.002612	0
ENST00000579945	ENSG00000236256	DIAPH2-AS1	0	0	0	0	0.047511	0
ENST00000648200	ENSG00000203930	LINC00632	0	0	0	0	0.01403	0
ENST00000608342	ENSG00000241769	LINC00893	0	0	0	0	0.028227	0
ENST00000618820	ENSG00000241769	LINC00893	0.003455	0.00199	0.000136	0.014566	0.087699	0.000414
ENST00000454307	ENSG00000214915	BX546450.1	0	0.017262	0	0	0.065166	0
ENST00000606489	ENSG00000272088	AL512413.1	0	0	0	0	0.027469	0
ENST00000563570	ENSG00000259961	AL354712.1	0	0	0	0	0.021925	0
ENST00000566195	ENSG00000261595	AL603832.2	0	0	0	0	0.014814	0
ENST00000456126	ENSG00000236866	AL157902.1	0	0	0	0	0.015601	0
ENST00000608183	ENSG00000228918	LINC01344	0	0	0	0	0.003031	0
ENST00000566476	ENSG00000260976	LINC01633	0	0	0	0	0.006262	0
ENST00000435108	ENSG00000236846	AL359979.2	0	0	0	0	0.01635	0
ENST00000521074	ENSG00000235931	LINC01553	0	0	0	0	0.007272	0
ENST00000548010	ENSG00000257582	LINC01475	0	0	0	0	0.007657	0
ENST00000534076	ENSG00000255420	CASC23	0	0.005323	0	0	0.013427	0
ENST00000532065	ENSG00000254438	AC022240.1	0	0	0	0	0.030682	0
ENST00000527770	ENSG00000254946	AC073172.2	0	0	0	0	0.01693	0
ENST00000534059	ENSG00000255300	AC079917.1	0	0	0	0	0.006811	0
ENST00000511013	ENSG00000248844	AP003555.1	0	0	0	0	0.005979	0
ENST00000542219	ENSG00000255970	LINC02421	0	0	0	0	0.001586	0
ENST00000651075	ENSG00000286259	AC078820.2	0	0	0	0	0.007421	0
ENST00000631321	ENSG00000276476	AL136962.1	0	0	0	0	0.004336	0
ENST00000637583	ENSG00000283579	AL160035.1	0	0	0	0	0.007892	0
ENST00000548416	ENSG00000258314	AL589182.1	0	0	0	0	0.006212	0
ENST00000611530	ENSG00000276210	LINC00226	0	0	0	0	0.013287	0
ENST00000560683	ENSG00000259587	AC114546.2	0	0	0	0	0.065996	0
ENST00000559918	ENSG00000259241	AC020892.1	0	0	0	0	0.012795	0
ENST00000610332	ENSG00000275175	AC106028.5	0	0	0	0	0.021695	0.003153
ENST00000554466	ENSG00000257060	AC091078.1	0	0	0	0	0.02683	0
ENST00000554105	ENSG00000257060	AC091078.1	0	0	0	0	0.003932	0
ENST00000556053	ENSG00000259134	LINC00924	0	0	0	0	0.007825	0
ENST00000561663	ENSG00000261302	AC106779.1	0	0	0	0	0.033905	0.019314
ENST00000564290	ENSG00000260658	AC138305.1	0.000364	0	0	0	0.027382	0
ENST00000565257	ENSG00000260715	AC093536.2	0	0	0.006078	0	0.029853	0
ENST00000421610	ENSG00000235300	AC090627.1	0	0	0	0	0.031417	0
ENST00000649027	ENSG00000285785	AC003950.1	0	0	0	0	0.042242	0
ENST00000597619	ENSG00000269842	AC011453.1	0	0	0	0	0.004468	0
ENST00000432894	ENSG00000232740	LINC01826	0	0	0	0	0.014652	0
ENST00000652679	ENSG00000286081	AC016682.1	0	0	0	0	0.0044	0
ENST00000419431	ENSG00000184856	LINC00308	0	0	0	0	0.011477	0
ENST00000623199	ENSG00000279442	AP000542.2	0	0	0	0	0.000226	0
ENST00000422917	ENSG00000235343	LINC01665	0	0	0	0	0.008456	0
ENST00000623422	ENSG00000279298	Z99916.3	0	0	0	0	0.001134	0
ENST00000430468	ENSG00000231405	AL008638.1	0	0	0	0	0.022185	0
ENST00000449126	ENSG00000233574	AL020994.3	0	0	0	0	0.02848	0
ENST00000562756	ENSG00000261675	AL022313.4	0	0	0	0	0.010257	0
ENST00000622888	ENSG00000225399	AC121247.1	0	0	0	0	0.008517	0
ENST00000493545	ENSG00000241213	LINC02024	0	0	0	0	0.010863	0
ENST00000457125	ENSG00000226782	AC117465.1	0	0	0	0	0.038284	0
ENST00000614303	ENSG00000242512	LINC01206	0	0	0	0	0.021285	0.009971
ENST00000507932	ENSG00000251412	AC006296.2	0	0	0	0	0.0075	0
ENST00000507759	ENSG00000250038	AC093791.1	0	0	0	0	0.014454	0
ENST00000487657	ENSG00000248802	AC078850.2	0	0	0	0	0.019521	0
ENST00000502757	ENSG00000251372	LINC00499	0	0	0	0	0.037013	0
ENST00000512036	ENSG00000250993	AC020551.1	0	0	0	0	0.0266	0
ENST00000560688	ENSG00000259757	AC091891.1	0	0	0	0	0.015252	0
ENST00000515364	ENSG00000249426	AC093206.1	0	0	0	0	0.084172	0
ENST00000650062	ENSG00000285914	AC022440.1	0	0	0	0	0.011515	0
ENST00000649875	ENSG00000285963	AL035467.2	0	0	0	0	0.005356	0
ENST00000454172	ENSG00000231776	LINC01611	0	0	0	0	0.012766	0
ENST00000434296	ENSG00000227502	LINC01268	0	0.003455	0	0	0.007605	0
ENST00000451905	ENSG00000233539	AC011294.1	0	0	0	0	0.010779	0
ENST00000465549	ENSG00000241456	AC005996.1	0	0	0	0	0.016507	0
ENST00000519840	ENSG00000254277	AC009446.1	0	0	0	0	0.025973	0
ENST00000562989	ENSG00000261710	AC104417.2	0	0	0	0	0.005852	0
ENST00000519762	ENSG00000254338	MAFA-AS1	0	0.01982	0	0	0.04419	0
ENST00000650746	ENSG00000237372	AL606807.1	0	0	0	0	0.008137	0
ENST00000635678	ENSG00000283001	AL450426.1	0	0	0	0	0.011448	0
ENST00000439014	ENSG00000226355	AL353803.1	0	0	0	0	0.033568	0
ENST00000463595	ENSG00000239333	RN7SL658P	0	0	0	0	0.001847	0
ENST00000608735	ENSG00000228933	AC107419.1	0	0	0	0	0.005785	0
ENST00000626665	ENSG00000281566	AL157778.1	0	0	0	0	0.008016	0
TCONS_00001855	ENSG00000162592	CCDC27	0	0	0	0.006966	0.068998	0
TCONS_00023857	ENSG00000158008	EXTL1	0.024335	0	0	0	0.156554	0
TCONS_00024094	ENSG00000126705	AHDC1	0.02267	0.00501	0.010951	0	0.202329	0.002896
TCONS_00004712	ENSG00000159023	EPB41	0.005253	0.027698	0.022787	0.035792	0.186066	0.05444
TCONS_00024565	XLOC_009913	XLOC_009913	0	0	0	0	0.043397	0.025253
TCONS_00025026	ENSG00000126070	AGO3	0	0	0	0	0.004976	0
TCONS_00025588	ENSG00000117016	RIMS3	0.022826	0.009673	0	0	0.057672	0
TCONS_00006754	ENSG00000187147	RNF220	0.031567	0.034228	0.008032	0.004763	0.199089	0.071375
TCONS_00027727	ENSG00000033122	LRRC7	0	0	0	0	0.001778	0
TCONS_00008497	ENSG00000197568	HHLA3	0	0.120856	0	0	0.370436	0
TCONS_00027936	ENSG00000057468	MSH4	0	0	0.008941	0	0.038088	0.009472
TCONS_00028239	XLOC_011347	XLOC_011347	0	0.004387	0	0	0.053468	0
TCONS_00010072	XLOC_004149	XLOC_004149	0	0	0.022476	0	0.166144	0
TCONS_00010037	XLOC_004119	XLOC_004119	0	0	0	0	0.015686	0
TCONS_00030360	XLOC_012256	XLOC_012256	0	0.017298	0	0	0.140492	0
TCONS_00012041	XLOC_004984	XLOC_004984	0	0.001274	0.008165	0	0.068884	0
[truncated: 419 more rows]

## Sheet: lncRNA_No UV_cluster 6
transcript_id	gene_id	gene_name	C_0	C_3	C_6	C_9	C_12	C_24
[truncated: 1,107 more rows]

[truncated: 2 more sheets: lncRNA_No UV_cluster 3_GOenrich, lncRNA_No UV_cluster 6_GOenrich]
