# Supplementary material for: IncRNA‐ZFAS1, an Emerging Gate‐Keeper in DNA Damage‐Dependent Transcriptional Regulation
Source: Adv Sci (Weinh). 2025 May 24;12(31):e12385. doi: 10.1002/advs.202412385 (PMC12376587; doi:10.1002/advs.202412385)
Supplement: Supplementary file 7 — Supplemental Table S6 [file ADVS-12-e12385-s006.xlsx]

## Sheet: lncRNA_UV_cluster 1
transcript_id	gene_id	gene_name	C_0	UV_3	UV_6	UV_9	UV_12	UV_24	UV_48	UV_24	UV_96
ENST00000585768	ENSG00000237491	AL669831.5	0.013076	0	0	0	0	0	0	0	0
ENST00000442305	ENSG00000229393	AL139246.4	0.014883	0	0	0	0	0	0	0	0
ENST00000581512	ENSG00000266075	RN7SL574P	0.036081	0	0	0	0	0.005247	0	0.005247	0
ENST00000641757	ENSG00000284744	AL591163.1	0.005729	0	0	0	0	0	0	0	0
ENST00000641117	ENSG00000284735	AL139424.3	0.00566	0	0	0	0	0	0	0	0
ENST00000317122	ENSG00000179743	AL450998.2	0.100101	0	0	0	0	0	0	0	0
ENST00000624517	ENSG00000279151	AL021920.1	0.018557	0	0	0	0	0	0	0	0
ENST00000635428	ENSG00000282843	AL590644.3	0.005049	0	0	0	0	0	0	0	0
ENST00000416470	ENSG00000235185	AL031727.2	0.007859	0	0	0	0	0	0	0	0
ENST00000604481	ENSG00000261326	LINC01355	0.0223	0	0	0	0	0	0	0	0
ENST00000652048	ENSG00000286061	RCAN3AS	0.000471	0	0	0	0	0	0	0	0
ENST00000456316	ENSG00000229162	AL445471.1	0.009609	0	0	0	0	0	0	0	0
ENST00000628643	ENSG00000225313	AL513327.1	0.023245	0	0	0	0	0	0	0	0
ENST00000641333	ENSG00000260971	AC119674.1	0.000818	0	0	0	0	0	0	0	0
ENST00000641445	ENSG00000260971	AC119674.1	0.017483	0	0	0	0	0	0	0	0
ENST00000585186	ENSG00000264271	RN7SL488P	0.002755	0	0	0	0	0	0	0	0
ENST00000490006	ENSG00000267272	LINC01140	0.090863	0	0	0.001036	0	0	0	0	0.000741
ENST00000432395	ENSG00000231613	AC099568.1	0.01548	0	0	0	0	0	0	0	0
ENST00000453347	ENSG00000228420	LINC01768	0.048212	0	0	0	0	0	0	0	0
ENST00000610820	ENSG00000233396	LINC01719	0.045316	0	0	0	0	0	0	0	0
ENST00000609678	ENSG00000272824	AC245100.7	0.007725	0	0	0	0	0	0	0	0
ENST00000607839	ENSG00000272030	AL162258.2	0.107952	0	0	0	0	0	0	0	0
ENST00000607963	ENSG00000273110	AL162591.2	0.01157	0	0	0	0	0	0	0	0
ENST00000605085	ENSG00000271380	AL451085.2	1.31672	0.000146	0.016205	0.002232	0.024085	0.015926	0.025449	0.015926	0.001863
ENST00000621242	ENSG00000188004	SNHG28	0.004497	0	0	0	0	0	0	0	0
ENST00000619303	ENSG00000276359	RF00017	0.01156	0	0	0	0	0	0	0	0
ENST00000607752	ENSG00000271917	AL357568.2	0.062277	0	0.006112	0	0	0.002934	0.000556	0.002934	0
ENST00000367638	ENSG00000213057	C1orf220	0.122545	0	0	0	0	0	0	0	0
ENST00000619896	ENSG00000264809	RF00017	0.006112	0	0	0	0	0	0	0	0
ENST00000652067	ENSG00000236230	AL356108.1	0.003498	0	0	0	0	0	0	0	0
ENST00000453525	ENSG00000228548	ITPKB-AS1	0.076387	0	0	0	0	0	0.005052	0	0
ENST00000602778	ENSG00000270110	AL353593.3	0.005775	0	0	0	0	0	0	0	0
ENST00000412483	ENSG00000233332	AL122008.3	0.004539	0	0	0	0	0	0	0	0
ENST00000412098	ENSG00000229463	LYST-AS1	0.005468	0	0	0	0	0	0	0	0
ENST00000652217	ENSG00000226919	AL365184.1	0.041248	0	0	0.005853	0	0	0	0	0
ENST00000437232	ENSG00000229124	VIM-AS1	0.001199	0	0	0	0	0	0	0	0
ENST00000451530	ENSG00000238258	AL121748.1	0.010964	0	0	0	0	0	0	0	0
ENST00000446107	ENSG00000227029	AL139237.1	0.095329	0	0	0	0	0	0	0	0
ENST00000618687	ENSG00000228065	LINC01515	0.012379	0.001274	0	0	0	0	0.001582	0	0
ENST00000480997	ENSG00000239942	RN7SL394P	0.027077	0	0	0	0	0	0	0	0
ENST00000422963	ENSG00000225299	AL139240.1	0.001976	0	0	0	0	0	0	0	0
ENST00000427492	ENSG00000233144	AL512656.1	0.005764	0	0	0.000119	0	0	0	0	0
ENST00000609182	ENSG00000273248	AC010997.5	0.011129	0	0	0	0	0	0	0	0
ENST00000498823	ENSG00000243446	RN7SL284P	0.122058	0.005203	0	0	0	0.013665	0	0.013665	0
ENST00000448729	ENSG00000230091	TMEM254-AS1	0.000479	0	0	0	0	0	0	0	0
ENST00000416301	ENSG00000226688	ENTPD1-AS1	0.002014	0	0	0	0	7.3e-05	0	7.3e-05	0
ENST00000641799	ENSG00000235823	OLMALINC	0.028407	0	0	0	0	0	0	0	0
ENST00000648389	ENSG00000285676	AL158212.5	0.090685	0	0.003341	0	0.013987	0	0	0	0
ENST00000433110	ENSG00000227076	AL158166.1	0.000547	0	0	0	0	0	0	0	0
ENST00000531966	ENSG00000255060	AC009656.1	0.021146	0	0	0	0	0	0	0	0.002704
ENST00000537170	ENSG00000256824	AP000721.2	0.002222	0	0	0	0	0	0	0	0
ENST00000610851	ENSG00000251562	MALAT1	0.006824	0	0	0	0	4.1e-05	3.8e-05	4.1e-05	3.7e-05
ENST00000531155	ENSG00000255404	AP001266.1	0.007547	0	0	0	0	0	0	0	0
ENST00000533502	ENSG00000255517	AP002748.3	0.044349	0	0	0	0	0	0	0	0
ENST00000445532	ENSG00000227726	AP001271.1	0.069341	0	0.01256	0	0	0.005112	0	0.005112	0
ENST00000526017	ENSG00000255539	AP002336.3	0.006584	0.000254	0	0	0	0	0	0	0
ENST00000650022	ENSG00000285864	AP000593.4	0.066223	0	0	0	0	0	0	0	0
ENST00000530190	ENSG00000254988	AP002498.1	0.000647	0	0	0	0	0	0	0	0
ENST00000534168	ENSG00000254420	AP003086.2	0.003092	0	0	0	0	0	0	0	0
ENST00000527030	ENSG00000254649	AP003086.3	0.005613	0	0	0	0	0	0	0	0
ENST00000526741	ENSG00000254563	AP002768.1	0.018871	0	0	0	0	0	0	0	0
ENST00000530261	ENSG00000246174	KCTD21-AS1	0.005959	0	0	0	0	0	0	0	0
ENST00000526206	ENSG00000254731	AP003059.1	0.010093	6.4e-05	0	0	0	0	0	0	0
ENST00000504906	ENSG00000250699	AP000892.1	0.01494	0	0.001717	0	0	0	0	0	0
ENST00000530918	ENSG00000254740	AP003396.3	0.010128	0	0	0	0	0	0	0	0
ENST00000616197	ENSG00000175773	AP002986.1	0.013058	0	0	0	0	0	0	0	0
ENST00000620330	ENSG00000278469	RF00017	0.08163	0	0	0	0	0	0	0	0
ENST00000545729	ENSG00000246695	RASSF8-AS1	0.005802	0	0	0	0	0	0	0	0
ENST00000538640	ENSG00000256504	AC009509.2	0.007285	0	0	0	0	0	0	0	0
ENST00000549516	ENSG00000258283	AC011603.3	0.016277	0	0	0	0	0	0	0	0
ENST00000562343	ENSG00000261586	AC068987.4	0.053598	0	0	0	0	0	0	0	0
ENST00000439545	ENSG00000228630	HOTAIR	0.034218	0	0	0	0	0.00017	0	0.00017	0
ENST00000552053	ENSG00000258137	AC079313.2	0.004962	0	0	0	0	0	0	0	0
ENST00000555461	ENSG00000259125	LRP1-AS	0.00234	0	0	0	0	0	0.000242	0	0
ENST00000504038	ENSG00000197301	HMGA2-AS1	0.008065	0.000382	0	0	0	0	0	0	0
ENST00000552415	ENSG00000257918	AC079385.3	0.001753	0	0	0	0	0	0	0	0
ENST00000609228	ENSG00000234608	MAPKAPK5-AS1	0.059469	0	0	0	0	0	0	0	0
ENST00000549725	ENSG00000258034	AC012157.1	0.000367	0	0	0	0	0	0	0	0
ENST00000637921	ENSG00000283389	RF00017	0.000754	0	0	0	0	0	0	0	0
ENST00000546264	ENSG00000256250	AC073912.1	0.003982	0	0	0	0	0	0	0	0
ENST00000576696	ENSG00000232977	LINC00327	0.018928	0	0	0	0	0	0	0	0
ENST00000445227	ENSG00000230490	AL139383.1	0.039017	0	0.002226	0	0	0	0	0	0
ENST00000432331	ENSG00000226519	LINC00390	0.020085	0	0	0	0	0	0	0	0
ENST00000650324	ENSG00000285856	AL353704.1	0.012515	0	0	0	0	0	0	0	0
ENST00000414992	ENSG00000233613	DCUN1D2-AS	0.018375	0	0	0	0	0	0	0	0
ENST00000622438	ENSG00000273618	AL135999.2	0.017697	0	0	0	0	0	0	0	0.00302
ENST00000552511	ENSG00000257636	G2E3-AS1	0.023015	0	0	0	0	0	0	0	0
ENST00000614852	ENSG00000278746	RN7SL660P	0.010629	0	0	0	0	0	0	0	0
ENST00000555157	ENSG00000258949	AL049870.3	0.004377	0	0	0	0	0	0	0	0
ENST00000554129	ENSG00000214900	LINC01588	0.034343	0	0	0	0	0	0	0	0
ENST00000558267	ENSG00000259319	AF111167.2	0.076333	0	0	0	0	0	0	0	0
ENST00000649987	ENSG00000259103	AF107885.2	0.006528	0	0	0	0	0	0	0	0
ENST00000554225	ENSG00000258454	AC016526.2	0.006651	0	0	9.5e-05	0	0	0	0	0
ENST00000553758	ENSG00000258610	AF111169.1	0.025167	0	0	0	0	0	0	0	0
ENST00000621501	ENSG00000277637	RN7SL469P	0.003602	0	0	0	0	0	0	0	0
ENST00000576873	ENSG00000262728	AC123768.3	0.074886	0	0	0	0	0.004417	0	0.004417	0
ENST00000560484	ENSG00000259345	AC013652.1	0.005599	0	0	0	0	0	0	0	0
ENST00000620766	ENSG00000247982	LINC00926	0.006825	0	0	0	0	0	0	0	0
ENST00000559824	ENSG00000245534	RORA-AS1	1e-06	0	0	0	0	0	0	0	0
ENST00000560238	ENSG00000259672	AC087612.1	0.008764	0	0	0	0	0	0	0	0
ENST00000612806	ENSG00000274995	AC013564.1	0.011145	0	0	0	0	0	0	0	0
ENST00000563041	ENSG00000260037	AC104938.1	0.011538	0	0	0	0	0	0	0	0
ENST00000316148	ENSG00000177699	AC011944.1	0.003968	0	0	0	0	0	0	0	0
ENST00000554530	ENSG00000258476	LINC02207	0.006606	0	0	0	0	0	0	0	0
ENST00000632058	ENSG00000267072	NAGPA-AS1	0.002405	0	0	0	0	0	0	0	0
ENST00000475032	ENSG00000243954	RN7SL743P	0.068394	0	0	0	0	0	0	0	0
ENST00000569490	ENSG00000261394	AC007598.2	0.014618	0	0	0	0	0	0	0	0
ENST00000570581	ENSG00000262529	AC130650.1	0.017606	0	0	0	0	0	0	0	0
ENST00000564705	ENSG00000260281	ITFG1-AS1	0.00271	0	0	0	0	0	0	0	0
ENST00000563879	ENSG00000261049	AC007347.1	0.012028	0	0	0	0	0	0	0	0
ENST00000563090	ENSG00000260621	AC092140.1	0.010326	0	0	0	0	0.00027	0	0.00027	0
ENST00000605277	ENSG00000261386	AC027682.4	0.025273	0	0	0	0.000351	0.000208	0	0.000208	0
ENST00000563770	ENSG00000261008	LINC01572	0.006381	0	0	0	0	0	0	0	0
ENST00000620814	ENSG00000259209	AC004943.1	0.02639	0	0	0	0	0	0	0	0
ENST00000563098	ENSG00000261058	AC099508.2	0.001539	0	0	0	0	0	0	0	0
ENST00000562685	ENSG00000260511	AC009145.2	0.002508	0	0	0	0	0	0	0	0
ENST00000565238	ENSG00000260832	AC125793.1	0.005278	0	0	0	0	0	0	0	0
ENST00000568771	ENSG00000261243	AC022165.1	0.028116	0	0	0	0	0	0	0	0
ENST00000565008	ENSG00000180422	LINC00304	0.00527	0	0	0	0	0	0	0	0
ENST00000569162	ENSG00000260923	LINC02193	0.031693	0	0	0	0	0	0	0	0
ENST00000441700	ENSG00000235085	AC091153.2	0.001915	0	0	0	0	0	0	0	0
ENST00000583963	ENSG00000265749	AC135178.3	0.020344	0	0	0	0	0	0	0	0
ENST00000580422	ENSG00000266667	AC005703.4	0.006794	0	0	0	0	0	0	0	0
ENST00000543475	ENSG00000226746	SMCR5	0.002771	0	0	0	0	0	0	0	0
ENST00000581901	ENSG00000266527	AC005697.2	0.003477	0	0	0	0	0	0	0	0
ENST00000581474	ENSG00000264031	ABHD15-AS1	0.00128	0.000172	0	0	0	0	0	0	0
ENST00000584815	ENSG00000263674	AC026620.1	0.003303	0	0	0	0	0	0	0	0
ENST00000619606	ENSG00000278638	AC244093.5	0.003329	0	0	0	0	0	0	0	0
ENST00000649665	ENSG00000264589	MAPT-AS1	0.002865	0	0	0	0	0	0	0	0
ENST00000582389	ENSG00000263766	AC025682.1	3e-05	0	0	0	0	0	0	0	0
ENST00000477144	ENSG00000233101	HOXB-AS3	0.002404	0	0	0	0	0	0	0	0
ENST00000503624	ENSG00000250310	AC006487.2	0.006213	0	0	0	0	0	0	0	0
ENST00000580960	ENSG00000265542	AC015845.2	0.007913	0	0	0	0	0	0	0	0
ENST00000613789	ENSG00000275680	RF00017	0.023949	0	0	0	0	0	0	0	0
ENST00000577938	ENSG00000265218	AC103810.2	0.000712	0	0	0	0	0	0	0	7e-06
ENST00000577544	ENSG00000264754	AC110921.1	0.034522	0.005336	0	0	0	0	0	0	0
ENST00000591334	ENSG00000227517	LINC01483	0.019067	0	0	0	0	0	0	0	0
ENST00000590137	ENSG00000267128	RNF157-AS1	0.00407	0	0	0	0	0	0	0	0
ENST00000607136	ENSG00000267546	AC015802.4	0.014646	0	0	0	0	0	0	0	0
ENST00000650316	ENSG00000267123	SCAT1	0.031392	0.001542	0.002465	0.000549	0	0	0	0	0
ENST00000573602	ENSG00000261924	AC127496.1	0.000842	0	0	0	0	0	0	0	0
ENST00000651869	ENSG00000262898	AC139099.2	0.002652	0	0	0	0	0	0	0	0
ENST00000585072	ENSG00000263745	AP005230.1	0.005837	0	0	0	0	0	0	0	0
ENST00000576606	ENSG00000177337	DLGAP1-AS1	0.08717	0.000914	0.01523	0.000226	0	0.001572	0.001548	0.001572	0.000293
ENST00000583840	ENSG00000265933	LINC00668	0.001165	0	0	0	0	0	0	0	0
ENST00000580491	ENSG00000266149	AP001094.3	0.004731	0	0	0	0	0	0	0	0
ENST00000583086	ENSG00000266850	AC090912.2	0.03633	0.00414	0	0	0	0	0	0	0
ENST00000410247	ENSG00000222179	RN7SKP26	0.034063	0	0	0	0	0	0	0	0
ENST00000637973	ENSG00000283667	AC009802.1	0.000101	0	0	0	0	0	0	0	0
ENST00000620563	ENSG00000273584	AC096708.3	0.014274	0	0	0	0	0	0	0	0
ENST00000583889	ENSG00000266844	AC093330.1	0.010764	0	0	0	0	0	0	0	0
ENST00000586630	ENSG00000267417	AC138474.1	0.006492	0	0	0	0	0	0	0	0
ENST00000588040	ENSG00000267152	AC093227.1	0.276026	0	0	0	0	0	0	0	0
ENST00000601911	ENSG00000268262	AC011445.1	0.04171	0	0	0	0	0.009773	0	0.009773	0
ENST00000595728	ENSG00000282951	AC008537.4	0.033613	0.000282	0.004426	0	0	0	0	0	0
ENST00000586251	ENSG00000267395	DM1-AS	0.053661	0	0.001381	0	0	0	0	0	1.4e-05
ENST00000595005	ENSG00000268518	AC020909.2	0.00638	0	0	0	0	0	0	0	0
ENST00000594562	ENSG00000268266	AC003005.2	0.032997	0	0	0	0	0	0	0	0
ENST00000454530	ENSG00000226649	AC019118.1	0.007454	0	0	0	0	0	0.000357	0	0
ENST00000453900	ENSG00000235092	ID2-AS1	0.033952	0	0	0	0	0	0	0	0
ENST00000607415	ENSG00000271868	AC114810.1	2.1227	0.081621	0.05797	0.014706	0	0.029668	0	0.029668	0.092318
ENST00000416453	ENSG00000234945	GTF3C2-AS1	1.5e-05	0	0	0	0	0	0	0	0
ENST00000428036	ENSG00000226833	AC092164.1	0.003945	0	0	0	0	0	0	0	0
ENST00000431376	ENSG00000230730	AC074011.1	0.025829	0	0	0	0	0	0	0	0
ENST00000628580	ENSG00000232973	CYP1B1-AS1	0.010551	0	0	0	0	0	0	0	0
ENST00000610172	ENSG00000232973	CYP1B1-AS1	0.004296	0	0	0	0	0	0	0	0
ENST00000631022	ENSG00000227028	SLC8A1-AS1	0.009718	0	7.4e-05	0	0	7e-06	0	7e-06	0
ENST00000593848	ENSG00000227028	SLC8A1-AS1	0.001663	0	0	0	0	0	0	0	0
ENST00000422013	ENSG00000224875	AC083949.1	0.014685	0.002424	0	0	0	0	0	0	0
ENST00000409518	ENSG00000222005	LINC01118	0.082187	0	0	0	0	0	0	0	0
ENST00000468141	ENSG00000239332	LINC01119	0.070569	0	0	0	0	0	0	0	0.00334
ENST00000578974	ENSG00000270820	AC016727.1	0.002392	0	0	0	0	0	0	0	0
ENST00000593336	ENSG00000235885	LINC01828	0.025721	0	0	0	0	0	0	0	0.002154
ENST00000604464	ENSG00000270462	AC005034.2	0.018905	0	0	0	0	0	0	0	0
ENST00000612724	ENSG00000222041	CYTOR	0.005682	0	0	0	0	0	0	0	0
ENST00000646578	ENSG00000222041	CYTOR	0.021099	0	0	0	0	0	0	0	0
ENST00000419296	ENSG00000204588	LINC01123	0.015348	0	0	0	0	0	0	0	0
ENST00000438897	ENSG00000229118	AC068491.2	0.009593	0	0	0	0	0.001022	0	0.001022	0
ENST00000413602	ENSG00000231013	AC013275.1	0.003903	0	0	0	0	0	0	0	0
ENST00000609350	ENSG00000272667	AC012306.2	2.76238	0.027608	0.024475	0.018138	0.022323	0.016554	0.02009	0.016554	0.016283
ENST00000607985	ENSG00000231890	DARS-AS1	0.019581	0	0	0	0	0	0	0	0
ENST00000634873	ENSG00000283118	AC009951.2	0.003543	0	0	0	0	0	0	0	0
ENST00000449526	ENSG00000228586	AC005042.2	0.011242	0	0	0	0	0	0	0	0
ENST00000623667	ENSG00000234350	AC007405.1	0.006158	0	0	0	0	0	0	0	0
ENST00000412133	ENSG00000229941	AC012499.1	0.002268	0	0	0	0	0	0	0	0
ENST00000587576	ENSG00000237298	TTN-AS1	0.01231	0	0	0	0	0	0	0	0
ENST00000603521	ENSG00000270574	AC010680.2	0.003722	0	0	0	0	0	0	0	0
ENST00000415357	ENSG00000231689	LINC01090	0.002663	0	0	0	0	0	0	0	0
ENST00000435643	ENSG00000224342	AC007879.1	0.006657	0	0	0	0	0	0	0	0
ENST00000619343	ENSG00000275582	AL031670.1	0.047111	0	0	0	0	0	0	0	0.01077
ENST00000449270	ENSG00000243961	PARAL1	0.006323	0	0	0	0	0	0	0	0
ENST00000616177	ENSG00000232712	KIZ-AS1	0.000641	0	0	0	0	0	0	0	0
ENST00000611296	ENSG00000278276	AL110115.2	0.007314	0	0	0	0	0	0	0	0
ENST00000620523	ENSG00000277301	AL034550.2	0.004449	0	0	0	0	0	0	0	0
ENST00000423074	ENSG00000230753	ZNF341-AS1	0.047887	0	0	0	0	0	0	0	0
ENST00000412495	ENSG00000174403	MIR1-1HG-AS1	0.003423	0	0	0	0	0	0	0	0
ENST00000624113	ENSG00000280191	LINC01669	0.006543	0	0	0	0	0	0	0	0
ENST00000624847	ENSG00000278903	CU633906.2	0.014743	0	0	0	0	0	0	0	0
ENST00000623095	ENSG00000277067	CU634019.1	2.55988	0.011268	0.038248	0.010998	0.00924	0.018836	0	0.018836	0.000375
ENST00000602659	ENSG00000215386	MIR99AHG	0.000766	0	0	0	0	0	0	0	0
ENST00000426942	ENSG00000185186	LINC00313	0.005667	0	0	0	0	0	0	0	0
ENST00000451035	ENSG00000235890	TSPEAR-AS1	0.061824	0	0	0	0	0	0	0	0
ENST00000463821	ENSG00000244296	RN7SL168P	0.012615	0	0	0	0	0	0	0	0
ENST00000614284	ENSG00000213888	LINC01521	1.35598	0.045664	0.035048	0.022441	0.036122	0.028278	0.046734	0.028278	0.022913
ENST00000420096	ENSG00000182057	OGFRP1	0.045567	0	0	0	0	0	0	0	0
ENST00000443063	ENSG00000230319	AL022476.1	0.005321	0	0	0	0	0	0	0	0
ENST00000651394	ENSG00000224271	AL117329.1	0.023243	0	0	0	0	0	0	0	0
ENST00000652505	ENSG00000224271	AL117329.1	0.007439	0	0	0	0	0	0	0	0
ENST00000651625	ENSG00000224271	AL117329.1	0.005194	0	0	0	0	0	0	0	0
ENST00000478724	ENSG00000235978	AC018816.1	0.010553	0	0	0	0	0	0	0	0
ENST00000652500	ENSG00000270207	AC077690.1	0.005271	0	0	0	0	0	0	0	0
ENST00000420095	ENSG00000227110	LMCD1-AS1	3.7e-05	1e-06	0	0	0	0	0	0	0
ENST00000522221	ENSG00000206573	THUMPD3-AS1	0.526925	0.025081	0.010914	0.002916	0.034365	0.026658	0.000111	0.026658	0.022783
ENST00000628760	ENSG00000228242	AC093495.1	0.000234	0	0	0	2.5e-05	0	0	0	0
ENST00000595975	ENSG00000249786	EAF1-AS1	0.008399	0	0	0	0	0	0	0	0
ENST00000413430	ENSG00000235904	RBMS3-AS3	0.002706	0	0	0	0	0	0	0	0
ENST00000447181	ENSG00000232490	OSBPL10-AS1	0.008088	0	0	0	0	0	0	0	0
ENST00000425156	ENSG00000223797	ENTPD3-AS1	0.024855	0	0.001241	0	0	0	0	0	0.003626
ENST00000626936	ENSG00000232354	VIPR1-AS1	0.006345	0	0	0	0	0	0	0	0
ENST00000457115	ENSG00000227245	AC092042.1	0.009364	0	0	0	0	0	0	0	0
ENST00000649466	ENSG00000285766	AC092042.4	0.011128	0	0	0	0	0	0	0	0
ENST00000427258	ENSG00000235845	AC098649.1	0.043554	0	0	0	0	0	0	0	0
ENST00000462717	ENSG00000243410	PSMD6-AS1	0.02387	0	0.004031	0	0	0	0	0	0
ENST00000482677	ENSG00000241316	SUCLG2-AS1	0.02986	0	0	0	0	0	0	0	0
ENST00000599467	ENSG00000244513	AC109587.1	0.022891	0	0	0	0	0	0	0	0
ENST00000641053	ENSG00000240405	SAMMSON	0.005197	0	0	0	0	0	0	0	0
ENST00000615819	ENSG00000274387	AC097634.2	0.013045	0	0	0	0	0	0	0	0
ENST00000483840	ENSG00000241280	AC106712.1	0.067491	0.005308	7.5e-05	0	0	0	0	0	0.011202
ENST00000466734	ENSG00000243701	DUBR	2.35613	0.006822	0.003385	0.002457	0.009088	0.01172	0.008725	0.01172	0.004808
ENST00000470313	ENSG00000240057	AC078785.1	0.065937	0	0	0	0	0	0	0	0.011013
ENST00000508263	ENSG00000248607	AC117422.1	0.019999	0	0	0	0	0	0	0	0
ENST00000502789	ENSG00000206417	H1FX-AS1	0.009065	0	0	0	0	0	0	0	0
ENST00000362449	ENSG00000199319	RN7SKP25	0.066514	0	0	0	0	0	0	0	0
ENST00000424690	ENSG00000226779	NAALADL2-AS2	0.003618	0	0	0	0	0	0	0	0
ENST00000446548	ENSG00000228221	LINC00578	0.005225	0	0	0	0	0	0	0	0
ENST00000642922	ENSG00000242808	SOX2-OT	0.015995	0	0	0	0	0	0	0	0
ENST00000628547	ENSG00000242086	MUC20-OT1	0.021538	0	0	0	0	0	0	0	1.7e-05
ENST00000627363	ENSG00000242086	MUC20-OT1	0.015851	0	0.002674	0	0	0	0	0	0
ENST00000430666	ENSG00000227375	DLG1-AS1	0.004473	0	0	0	0	0	0	0	0
ENST00000607877	ENSG00000272588	AC139887.4	0.010922	0	0	0	0	0	0	0	0
ENST00000512370	ENSG00000248138	AC097515.1	6e-05	0	0	0	0	0	0	0	0
ENST00000511010	ENSG00000249502	AC006160.1	0.052222	0	0	0	0	0	0	0	0
ENST00000511431	ENSG00000248515	AC024230.1	0.004346	0	0	0	0	0	0	0	0
ENST00000604448	ENSG00000271172	AC104662.1	0.015419	0	0	0	0	0	0	0	0
ENST00000509449	ENSG00000249207	AC079921.1	0.002166	0	0	0	0	0	0	0	0
ENST00000652065	ENSG00000250075	AC104806.2	0.003227	0	0	0	0	0	0	0	0
ENST00000516948	ENSG00000252757	RN7SKP96	0.010966	0	0	0	0	0	0	0	0
ENST00000504213	ENSG00000248511	AC112695.1	0.006602	0	0	0	0	0	0	0	0
ENST00000426240	ENSG00000228358	LINC02263	0.013265	0	0	0	0	0	0	0	0
ENST00000448804	ENSG00000228358	LINC02263	0.031351	0	0	0	0	0	0	0	0.005696
ENST00000609616	ENSG00000196951	SCOC-AS1	0.019086	0	0	0	0	0	0	0	0
ENST00000508752	ENSG00000248429	FAM198B-AS1	0.008678	0	0	0	0	0	0	0	0
ENST00000511846	ENSG00000251128	WWC2-AS1	0.000975	0	0	0	0	0	0	0	0
ENST00000652281	ENSG00000251365	LINC02236	0.008303	0	0	0	0	0	0	0	0
ENST00000511310	ENSG00000248537	AC091906.1	0.003224	0	0	0	0	0	0	0	0
ENST00000505196	ENSG00000248131	LINC01194	0.006951	0	0	0	0	0	0	0	0
ENST00000511821	ENSG00000248223	AC026785.2	0.03917	0	0	0	0	0	0	0	0
ENST00000523584	ENSG00000254138	AC113386.1	0.012766	0	0	0	0	0	0	0	0
ENST00000504609	ENSG00000249069	LINC01033	0.003157	0	0	0	0	0	0	0	0
ENST00000584555	ENSG00000266477	RN7SL616P	0.008787	0	0	0	0	0	0	0	0
ENST00000643819	ENSG00000250802	ZBED3-AS1	0.027081	0	0	0	0	0	0	0	0
ENST00000502041	ENSG00000247572	CKMT2-AS1	1.64306	0.000229	0.421766	0.003581	0.000512	6.5e-05	0	6.5e-05	0
ENST00000509406	ENSG00000250320	AC113383.1	0.036564	0	0	0	0	0	0	0	0
ENST00000516142	ENSG00000251951	RN7SKP34	0.002583	0	0	0	0	0	0	0	0
ENST00000506978	ENSG00000245526	LINC00461	0.005961	0	0	0	0	0	0	0	0
ENST00000507813	ENSG00000250015	AC018752.1	0.021857	0	0	0	0	0	0	0	0
ENST00000651821	ENSG00000286111	AC116362.2	0.001629	0	0	0	0	0	0	0	0
ENST00000450613	ENSG00000248752	AC116362.1	0.006818	0	0	0	0	0	0	0	0
ENST00000555344	ENSG00000249647	C5orf66-AS2	0.034096	0	0	0	0	0	0	0	0
ENST00000521563	ENSG00000245146	MALINC1	0.048885	0	0	0	0	0	0	0	0
ENST00000625195	ENSG00000278901	AC005609.1	0.012728	0	0	0	0	0	0	0	0
ENST00000624991	ENSG00000280029	AC244517.11	0.003699	0	0	0	0	0	0	0	0
ENST00000625053	ENSG00000280026	AC005618.3	0.014175	0	0	0	0	0	0	0	0
ENST00000624928	ENSG00000279855	AC005618.2	0.009978	0	0	0	0	0	0	0	0
ENST00000511390	ENSG00000250025	AC011396.2	0.010144	0	0	0	0	0	0	0	0
ENST00000512730	ENSG00000250407	AC008728.1	0.013888	0	0	0	0	0	0	0	0
ENST00000602315	ENSG00000249669	CARMN	0.002912	0	0	0	0	0	0	0	0
ENST00000505340	ENSG00000249669	CARMN	0.010332	0	0	0	0	0	0	0	0
ENST00000635333	ENSG00000249738	AC008691.1	0.012042	0	0	0	0	0	0	0	0.003214
ENST00000520705	ENSG00000254163	AC025434.1	0.004739	0	0	0	0	0	0	0	0
ENST00000514724	ENSG00000251018	HMMR-AS1	0.00364	0	0	0	0	0	0	0	0
ENST00000511565	ENSG00000246334	PRR7-AS1	2.8e-05	0	0	0	0	0	0	0	0
ENST00000511517	ENSG00000250900	AC008443.6	0.008605	0	0	0	0	0	0	0	0
ENST00000531092	ENSG00000250903	GMDS-DT	0.075522	0	0	0	0	0	0	0	0
ENST00000650019	ENSG00000285603	AL035693.1	0.001235	0	0	0	0	0	0	0	0
ENST00000454396	ENSG00000238158	AL391422.3	0.005601	0	0	0	0	0	0	0	0
ENST00000636202	ENSG00000228412	AL022068.1	0.001009	0	0	0	0	0	0	0	0
ENST00000421167	ENSG00000233848	AL513188.1	0.006416	0	0	0	0	0	0	0	0
ENST00000651751	ENSG00000272168	CASC15	0.03068	0	0.000759	0	0	0	0	0	0
ENST00000647995	ENSG00000285571	AL513548.4	0.014146	2.8e-05	0	0	0	0.001787	0	0.001787	6.5e-05
ENST00000648356	ENSG00000285849	AL021918.4	0.005135	0	0	0	0	0	0	0	0
ENST00000413358	ENSG00000231074	HCG18	0.017362	0	0	0	0	0	0	0	0
ENST00000477984	ENSG00000197251	LINC00336	0.007479	0	0	0	0	0	0	0	0
ENST00000526611	ENSG00000246982	Z84485.1	0.016275	0	0	0	0	0	0	0	0
ENST00000607490	ENSG00000271761	AL021368.1	0.01036	0	0	0	0	0	0	0	0
ENST00000592038	ENSG00000226803	ZNF451-AS1	0.004856	0	0	0	0	0	0	0	0
ENST00000589394	ENSG00000226803	ZNF451-AS1	0.005979	0	0	0	0	0	0	0	0
ENST00000429832	ENSG00000229154	KCNQ5-AS1	0.007157	0	0	0	0	0	0	0	0
ENST00000413945	ENSG00000233237	LINC00472	0.017331	0	0	0	0	0.00043	0	0.00043	0
ENST00000427048	ENSG00000233967	AL359715.1	0.066408	0	0	0.014856	0	0	0	0	0.00107
ENST00000369120	ENSG00000203808	BVES-AS1	0.029902	0	0	0	0	0	0	0	0
ENST00000456352	ENSG00000231889	TRAF3IP2-AS1	0.023007	0	0	0	0	0	0	0	0
ENST00000606892	ENSG00000231889	TRAF3IP2-AS1	0.019176	0	0	0	0	0	0	0	0
ENST00000520554	ENSG00000228624	HDAC2-AS2	0.032052	0.000164	0	0	0.000573	0	2.9e-05	0	0
ENST00000417390	ENSG00000227945	AL590006.1	0.002585	0	0	0	0	0	0	0	0
ENST00000440246	ENSG00000236166	AL021408.1	0.01141	0	0	0	0	0	0	0	0
ENST00000457081	ENSG00000234567	AL024497.2	0.000967	0	0	0	0	0	0	0	0
ENST00000442094	ENSG00000227681	AL033504.1	0.003901	0	0	0	0	0	0	0	0
ENST00000455390	ENSG00000231654	RPS6KA2-AS1	0.004574	0	0	0	0	0	0	0	0
ENST00000462565	ENSG00000242474	AC093627.5	0.003218	0	0	0	0	0	0	0	0
ENST00000457484	ENSG00000230487	PSMG3-AS1	0.004369	0	0	0	0	0	0	0	0
ENST00000403226	ENSG00000217455	AC073316.1	0.017825	0	0	0	0	0	0	0	0
ENST00000409974	ENSG00000222004	C7orf71	0.012139	0	0	0	0	0	0	0	0
ENST00000650830	ENSG00000205628	LINC01446	0.002736	0	0	0	0	0	0	0	0
ENST00000652104	ENSG00000205628	LINC01446	0.003566	0	0	0	0	0	0	0	0
ENST00000652029	ENSG00000205628	LINC01446	0.017188	0	0	0	0	0	0	0	0
ENST00000454777	ENSG00000223475	AC099681.1	0.008854	0	0	0	0	0	0	0	0
ENST00000594469	ENSG00000228113	AC003991.1	0.033041	0	0	0	0	0	0.001936	0	0
ENST00000435695	ENSG00000237819	AC002454.1	0.011821	0.003167	0	0	0	0	0	0	0
ENST00000629014	ENSG00000233705	SLC26A4-AS1	0.008702	0	0	0	0	0	0	0	0
ENST00000466717	ENSG00000243230	AC011005.4	0.005891	0	0	0	0	0	0	0	0
ENST00000463561	ENSG00000284644	AC074386.1	0.005289	0	0	0	0	0	0	0	0
ENST00000464464	ENSG00000239911	PRKAG2-AS1	0.049722	0	0	0	0	0	0	0	0
ENST00000418309	ENSG00000182648	LINC01006	0.015312	0	0	0	0	0	0	0	0
ENST00000649916	ENSG00000248538	AC022784.1	0.007192	0	0	0	0	0	0	0	0
ENST00000528629	ENSG00000269954	AC022239.1	0.024807	0	0	0	0	0	0	0	0.002618
ENST00000528514	ENSG00000255495	AC145124.1	0.620068	0	0.012459	0.006741	0.027288	0.014475	0.005365	0.014475	0.010302
ENST00000518623	ENSG00000251191	LINC00589	0.00924	0	0	0	0	0.001819	0	0.001819	0
ENST00000517897	ENSG00000253388	AC124067.1	0.007304	0	0	0	0	0	0	0	0
ENST00000524133	ENSG00000253174	AC009630.2	0.002603	0	0	0	0	0	0	0	0
ENST00000520496	ENSG00000254314	AC021915.2	0.012408	0	0	0	0	0	0	0	0
ENST00000529518	ENSG00000228862	AC068389.1	0.008224	0	0	0	0	0	0	0	0
ENST00000532232	ENSG00000251396	LINC01301	0.034693	0	0	0	0	0	0	0	0
ENST00000524152	ENSG00000235531	MSC-AS1	0.098888	0	0	0	0	0	0	0	0
ENST00000521467	ENSG00000235531	MSC-AS1	0.079064	0	0	0	0	0	0	0	0
ENST00000520778	ENSG00000254238	AC100782.1	0.02031	0	0	0	0	0	0	0	0
ENST00000520894	ENSG00000250295	RDH10-AS1	0.014382	0	0	0	0	0	0	0	0
ENST00000522703	ENSG00000253302	STAU2-AS1	0.045143	0	0	0	0	0	0	0	0
ENST00000518631	ENSG00000253553	AC090578.1	0.027957	0	0	0	0	0	0	0	0
ENST00000521048	ENSG00000253972	MAL2-AS1	0.005791	0	0	0	0	0	0	0	0
ENST00000305248	ENSG00000218839	FAM138C	0.010903	0	0	0	0	0	0	0	0
ENST00000424605	ENSG00000236404	VLDLR-AS1	0.004404	0	0	0	0	0	0	0	0
ENST00000457566	ENSG00000232104	RFX3-AS1	0.009973	0	0	0	0	0	0	0	0
ENST00000427722	ENSG00000232104	RFX3-AS1	0.024349	0	0	0	0	0	0	0	0
ENST00000439447	ENSG00000230694	AL450003.1	0.040453	0	0	0	0	0	0	0	0
ENST00000433645	ENSG00000234840	LINC01239	0.001293	0	0	0	0	0	0	0	0
ENST00000651784	ENSG00000240498	CDKN2B-AS1	0.008863	0	0.001482	0	0	0	0	0	0
ENST00000645223	ENSG00000240498	CDKN2B-AS1	0.006448	0	0	0	0	0	0	0	0.001562
ENST00000515888	ENSG00000251697	RN7SKP24	0.013872	0	0	0	0	0	0	0	0
ENST00000427509	ENSG00000238113	LINC01410	0.04068	0	0	0	0	0	0	0	0
ENST00000429953	ENSG00000234394	AL353608.3	0.001797	0	0	0	0	0	0	0	0
ENST00000647300	ENSG00000225937	PCA3	0.004764	0	0	0	0	0	0	0	0
ENST00000602579	ENSG00000269994	AL513318.2	0.003916	0	0	0	0	0	0	0	0
ENST00000454869	ENSG00000232063	AL691447.2	0.012841	0	0	0	0	0	0	0	0
ENST00000562653	ENSG00000260677	AL445531.1	0.00228	0	0	0	0	0	0	0	0
ENST00000647206	ENSG00000284977	AL160272.1	0.011688	0	0	0	0	0	0	0	0
ENST00000453870	ENSG00000230536	AL360268.1	0.001682	0	0	0	0	0	0	0	0
ENST00000608502	ENSG00000207955	AL359091.1	0.000838	0	2e-06	0	0	0	0	0	0
ENST00000586290	ENSG00000236986	AL157938.2	0.0028	0	0	0	0	0	0	0	0
ENST00000582825	ENSG00000264573	RN7SL15P	0.026177	0	0	0	0	0	0	0	0
ENST00000423992	ENSG00000230590	FTX	0.011109	0	0	0	0	0	0	0	0
ENST00000650128	ENSG00000203930	LINC00632	0.01293	0	0	0	0	0	0	0	0
ENST00000598177	ENSG00000272681	FAM223B	0.000166	0	0	0	0	0	0	0	0
ENST00000625031	ENSG00000279245	FAM223A	0.098807	0	0	0	0	0	0	0	0
ENST00000651355	ENSG00000176728	TTTY14	0.003851	0	0	0	0	0	0	0	0
ENST00000635092	ENSG00000228750	LINC01672	0.00797	0	0	0	0	0	0	0	0
ENST00000439059	ENSG00000230023	AL590683.1	0.008182	0	0	0	0	0	0	0	0
ENST00000370624	ENSG00000180869	LINC01555	0.005464	0	0	0	0	0	0	0	0
ENST00000461982	ENSG00000242565	RN7SL372P	0.023268	0	0	0	0	0	0	0	0
ENST00000426519	ENSG00000234142	LINC01675	0.00953	0	0	0	0	0	0	0	0
ENST00000422858	ENSG00000225857	AL162431.1	0.016014	0	0	0	0	0	0	0	0
ENST00000622121	ENSG00000229739	AL596220.1	0.028482	0	0	0	0	0	0	0	0
ENST00000608148	ENSG00000273012	AL353600.1	0.029404	0	0	0	0	0	0	0	0
ENST00000634971	ENSG00000255269	AC024475.3	0.004229	0	0	0	0	0	0	0	0
ENST00000506329	ENSG00000250230	AP002754.1	0.003354	0	0	0	0	0	0	0	0
ENST00000564619	ENSG00000260254	AP000997.2	0.000935	0	0	0	0	0	0	0	0
ENST00000567082	ENSG00000261257	AP000821.1	0.004127	0	0	0	0	0	0	0	0
ENST00000631195	ENSG00000281097	AP003500.1	0.002574	0	0	0	0	0	0	0	0
ENST00000532071	ENSG00000255512	AP005135.1	0.010992	0	0	0	0	0	0	0	0
ENST00000612592	ENSG00000275119	AC244131.2	0.046009	0	0	0	0	0	0	0	0
ENST00000535066	ENSG00000257009	AC022367.1	0.014673	0	0	0	0	0	0	0	0
ENST00000537327	ENSG00000256513	AC022081.1	0.016855	0	0	0	0	0	0	0	0
ENST00000549223	ENSG00000257657	AC079950.1	0.002246	0	0	0	0	0	0	0	0
ENST00000547876	ENSG00000257517	AC026765.1	0.008207	0	0	0	0	0	0	0	0
ENST00000552992	ENSG00000258018	LINC02457	0.01322	0	0	0	0	0	0	0	0
ENST00000541258	ENSG00000256659	LINC02368	0.005903	0	0	0	0	0	0	0	0
ENST00000414407	ENSG00000237879	LINC00398	0.005943	0	0	0	0	0	0	0	0
ENST00000617568	ENSG00000274317	LINC02334	0.006345	0	0	0	0	0	0	0	0
ENST00000325811	ENSG00000177596	AL355390.1	0.003385	0	0	0	0	0	0	0	0
ENST00000442478	ENSG00000234625	LINC00380	0.013378	0	0	0	0	0	0	0	0
ENST00000555481	ENSG00000258642	AL133371.1	0.03589	0	0	0	0	0	0	0	0
ENST00000557308	ENSG00000259111	AL079307.2	0.006039	0	0	0	0	0	0	0	0
ENST00000556346	ENSG00000258390	LINC02318	0.017133	0	0	0	0	0	0	0	0
ENST00000623367	ENSG00000258729	AL355102.3	0.000658	0	0	0	0	0	0	0	0
ENST00000559904	ENSG00000259437	AC093334.1	0.008398	0	0	0	0	0	0	0	0
ENST00000616660	ENSG00000273923	AC104260.1	0.021928	0	0	0	0	0	0	0	0
ENST00000645754	ENSG00000285040	AC092723.4	0.004067	0	0	0	0	0	0	0	0
ENST00000577621	ENSG00000266588	AC006441.4	0.01545	0	0	0	0	0	0	0	0
ENST00000592572	ENSG00000267665	AC021683.3	0.003549	0	0	0	0	0	0	0	0
ENST00000572353	ENSG00000262188	LINC01978	0.043774	0	0	0	0	0	0	0	0
ENST00000570301	ENSG00000262223	AC110285.1	0.007226	0	0	0	0	0	0	0	0
ENST00000479676	ENSG00000243591	RN7SL282P	0.013265	0	0	0	0	0	0	0	0
ENST00000589729	ENSG00000267215	AC040963.1	0.009662	0	0	0	0	0	0	0	0
ENST00000323355	ENSG00000179676	LINC00305	0.009026	0	0	0	0	0	0	0	0
ENST00000590086	ENSG00000267372	AC005330.1	0.016836	0	0	0	0	0	0	0	0
ENST00000597420	ENSG00000269564	AC008753.2	0.010791	0	0	0	0	0	0	0	0
ENST00000449621	ENSG00000226277	AC105393.1	0.006231	0	0	0	0	0	0	0	0
ENST00000606068	ENSG00000272342	AC116609.3	0.040831	0.005876	0	0	0	0	0	0	0
ENST00000416534	ENSG00000226506	AC007463.1	0.009531	0	0	0	0	0	0	0	0
ENST00000415635	ENSG00000237261	RF00017	0.010116	0	0	0	0	0	0	0	0
ENST00000484688	ENSG00000275961	RN7SL210P	0.01222	0	0	0	0	0	0	0	0
ENST00000424628	ENSG00000231896	AC019185.2	0.009597	0	0	0	0	0	0	0	0
ENST00000617644	ENSG00000276768	AL121890.2	0.002768	0	0	0	0	0	0	0	0
ENST00000432706	ENSG00000223492	AL391097.1	0.004653	0	0	0	0	0	0	0	0
ENST00000622344	ENSG00000277385	RF00017	0.005514	0	0	0	0	0	0.001312	0	0
ENST00000637313	ENSG00000283314	LINC02357	0.004858	0	0	0	0	0	0	0	0
ENST00000510772	ENSG00000249771	AC108210.1	0.009551	0	0	0	0	0	0	0	0
ENST00000562284	ENSG00000260918	AC107398.3	0.001688	0	0	0	0	0	0	0	0
ENST00000514222	ENSG00000251676	SNHG27	0.011549	0	0	0	0	0	0	0	0
ENST00000504144	ENSG00000245954	LINC02273	0.007416	0	0	0	0	0	0	0	0
ENST00000565306	ENSG00000259968	AC093283.1	0.00733	0	0	0	0	0	0	0	0
ENST00000501405	ENSG00000247402	AC099487.1	0.01669	0	0	0	0	0	0	0	0
ENST00000508424	ENSG00000248445	SEMA6A-AS1	0.006653	0	0	0	0	0	0	0	0
ENST00000508640	ENSG00000248445	SEMA6A-AS1	0.00044	0	0	0	0	0	0	0	0
ENST00000514214	ENSG00000248445	SEMA6A-AS1	0.009969	0	0	0	0	0	0	0	0
ENST00000607594	ENSG00000271766	AC010424.2	0.008683	0	0	0	0	0	0	0	0
ENST00000568244	ENSG00000261730	AL034346.1	0.00617	0	0	0	0	0	0	0	0
ENST00000620671	ENSG00000205971	AC074389.1	0.008537	0	0	0	0	0	0	0	0
ENST00000458624	ENSG00000244239	AC007009.1	0.013794	0	0	0	0	0	0	0	0
ENST00000446246	ENSG00000235669	AC004593.1	0.000823	0	0	0	0	0	0	0	0
ENST00000562524	ENSG00000259920	AC007938.1	0.002118	0	0	0	0	0	0	0	0
ENST00000378120	ENSG00000204960	BLACE	8.1e-05	0	0	0	0	0	0	0	0
ENST00000521242	ENSG00000253230	LINC00599	0.001284	0	0	0	0	0	0	0	0
ENST00000520386	ENSG00000254178	AC090103.1	0.032492	0	0	0	0	0	0	0	0
ENST00000523554	ENSG00000253842	AP003472.2	0.015711	0	0	0	0	0	0	0	0
ENST00000517318	ENSG00000254021	AC027031.1	0.016113	0	0	0	0	0	0	0	0
ENST00000517704	ENSG00000254008	LINC00051	0.006325	0	0	0	0	0	0	0	0
ENST00000453045	ENSG00000235601	BARX1-DT	0.005189	0	0	0	0	0	0	0	0
ENST00000454408	ENSG00000230676	AL353803.2	0.016886	0	0	0	0	0	0	0	0
ENST00000602508	ENSG00000269911	FAM226B	0.002644	0	0	0	0	0	0	0	0
ENST00000608811	ENSG00000237863	AL035425.1	0.011869	0	0	0	0	0	0	0	0
ENST00000436013	ENSG00000237863	AL035425.1	0.001173	0	0	0	0	0	0	0	0
TCONS_00003558	ENSG00000142794	NBPF3	0.079944	0	0	0	0	0	0	0	0
TCONS_00007947	XLOC_003193	XLOC_003193	0.078011	0	0	0	0	0	0	0	0
TCONS_00029438	XLOC_011880	XLOC_011880	0.01286	0	0	0	0	0	0	0	0
TCONS_00031920	ENSG00000197622	CDC42SE1	0.514143	0	0	0	0	0	0.110959	0	0
TCONS_00031923	ENSG00000197622	CDC42SE1	0.0027	0	0	0	0	0	0	0	0
TCONS_00036171	ENSG00000163531	NFASC	0.022935	0	0	0	0	0	0	0	0
TCONS_00036306	XLOC_014643	XLOC_014643	0.071306	0	0	0	0	0	0	0	0
TCONS_00020324	XLOC_008349	XLOC_008349	0.050407	0	0	0.005435	0	0	0	0	0
TCONS_00049390	XLOC_020794	XLOC_020794	0.010639	0	0	0	0	0	0	0	0
TCONS_00042178	XLOC_017476	XLOC_017476	0.013822	0	0	0	0	0	0.003224	0	0
TCONS_00043435	ENSG00000148655	LRMDA	0.014181	0	0	0.001195	0	0	0	0	0
TCONS_00044186	ENSG00000152779	SLC16A12	0.0546	0	0	0	0	0	0	0	0
TCONS_00053610	XLOC_022739	XLOC_022739	0.101289	0	0	0	0	0	0	0	0
TCONS_00046901	ENSG00000132334	PTPRE	0.156993	0	0	0	0	0	0	0	0
TCONS_00047041	ENSG00000171813	PWWP2B	0.101443	0	0.001538	0	0.003071	0.00188	0.000186	0.00188	0.000942
TCONS_00055437	XLOC_023418	XLOC_023418	0.101281	0	0	0	0.010447	0	0	0	0
TCONS_00056831	ENSG00000129159	KCNC1	0.08614	0	0	0	0	0	0	0	0
TCONS_00072561	ENSG00000174547	MRPL11	0.056987	0	0	0	0	0	0	0	0
TCONS_00061780	ENSG00000162105	SHANK2	0.073737	0	0	0	0	0	0	0	0
TCONS_00074977	XLOC_030542	XLOC_030542	0.078662	0.013725	0	0	0	0.001199	0	0.001199	0
TCONS_00065645	ENSG00000165495	PKNOX2	0.039427	0	0	0	0	0	0	0	0
TCONS_00105226	ENSG00000183722	LHFPL6	0.015793	0	0	0	0	0	0	0	0
TCONS_00102019	XLOC_040985	XLOC_040985	0.05829	0	0	0	0	0	0	0	0.00292
TCONS_00110234	XLOC_045086	XLOC_045086	0.018496	0	0	0	0	0	0	0	0
TCONS_00117695	ENSG00000020577	SAMD4A	0.118791	0	0	0	0	0.008464	0	0.008464	0
TCONS_00111708	ENSG00000185650	ZFP36L1	0.082571	0	0	0	0	0.008573	0	0.008573	0
TCONS_00114697	ENSG00000142208	AKT1	1.36797	0	0	0	0	0.002895	0	0.002895	0
TCONS_00125290	ENSG00000188501	LCTL	0.076499	0	0	0	0	0	0	0	0
TCONS_00133378	ENSG00000080644	CHRNA3	0.111081	0	0	0	0	0	0	0	0
TCONS_00136596	ENSG00000262621	AC025283.2	0.109948	0	0	0	0	0	0.00294	0	0
TCONS_00137572	ENSG00000166780	C16orf45	0.053547	0	0	0	0	0	0	0	0
TCONS_00153944	ENSG00000006740	ARHGAP44	0.21833	0	0	0	0.039815	0	0.011186	0	0
TCONS_00171055	ENSG00000108588	CCDC47	0.059515	0	0	0	0	0	0	0	0
TCONS_00192529	ENSG00000186230	ZNF749	0.001604	0	0	0	0	0	0	0	0
TCONS_00222235	ENSG00000180398	MCFD2	1.7467	0	0	0.005352	0	0.021546	0.070976	0.021546	0.039153
TCONS_00217369	XLOC_082000	XLOC_082000	0.008061	0	0	0	0	0	0	0	5e-05
TCONS_00218587	XLOC_082539	XLOC_082539	0.0426	0	0	0	0	0	0	0	0
TCONS_00236423	XLOC_090147	XLOC_090147	0.059145	0	0	0.014182	0	0	0	0	0
TCONS_00244907	XLOC_093875	XLOC_093875	0.353119	0	0	0	0	0	0	0	0.01204
TCONS_00246166	XLOC_094418	XLOC_094418	0.037998	0	0	0	0	0	0	0	0
TCONS_00275297	ENSG00000174844	DNAH12	0.034915	0	0	0.000487	0	0	0	0	0
TCONS_00263716	ENSG00000144736	SHQ1	0.011797	0	0	0	0	0	0	0	0
TCONS_00295672	XLOC_114887	XLOC_114887	0.108166	0	0	0	0.0052	0	0.014945	0	0
TCONS_00297796	XLOC_115717	XLOC_115717	0.042338	0	0	0	0	0	0	0	0
TCONS_00299472	ENSG00000170088	TMEM192	0.30196	0	0	0	0	0	0.036616	0	0
TCONS_00299993	XLOC_116804	XLOC_116804	0.003998	0	0	0	0	0	0	0	0
TCONS_00311555	ENSG00000066230	SLC9A3	0.02894	0	0	0	0	0	0.000888	0	0.001704
TCONS_00301723	XLOC_117701	XLOC_117701	0.090222	0	0	0	0	0	0	0	0
TCONS_00304549	ENSG00000284762	AC022414.1	0.010266	0	0	0	0	0	0	0	0
TCONS_00316782	XLOC_124749	XLOC_124749	0.067635	0	0	0	0	0	0	0	0.003054
TCONS_00317337	ENSG00000129595	EPB41L4A	0.040129	0	0	0	0	0	0	0	0
TCONS_00307594	ENSG00000132570	PCBD2	0.305964	0	0	0	0	0.007648	0.003032	0.007648	0
TCONS_00323046	XLOC_127595	XLOC_127595	0.076991	0	0	0	0	0	0	0	0
TCONS_00324419	ENSG00000196812	ZSCAN16	0.026829	0	0	0	0	0	0	0	0
TCONS_00335049	ENSG00000235109	ZSCAN31	0.074444	0	0	0	0	0	0	0	0
TCONS_00331438	XLOC_131787	XLOC_131787	0.086957	0	0	0	0	0	0	0	0
TCONS_00342318	XLOC_136999	XLOC_136999	0.070231	0	0	0	0	0	0	0	0
TCONS_00343342	ENSG00000112541	PDE10A	0.01481	0	0	0	0	0	0.003589	0	0
TCONS_00345280	XLOC_138276	XLOC_138276	0.077502	0	0	0	0	0	0	0	0
TCONS_00371834	ENSG00000104714	ERICH1	0.094755	0	0	0	0	0	0	0	0
TCONS_00364073	XLOC_145981	XLOC_145981	0.060455	0	0	0	0	0.004214	0	0.004214	0
TCONS_00368576	XLOC_147990	XLOC_147990	0.02352	0	0	0	0	0	0	0	0
TCONS_00369666	XLOC_148483	XLOC_148483	0.076244	0	0	0	0	0	0	0	0
TCONS_00378353	ENSG00000177570	SAMD12	0.009451	0	0	0	0	0	0	0	0
TCONS_00390307	ENSG00000174482	LINGO2	0.00272	0	0	0	0	0	0	0	0
TCONS_00391452	ENSG00000283486	FAM95C	0.002439	0	0	0	0	0	0	0	0
TCONS_00392094	ENSG00000107282	APBA1	0.072522	0	0	0	0	0	0	0	0
TCONS_00384817	ENSG00000131669	NINJ1	0.057409	0	0	0	0	0	0	0	0
TCONS_00393775	ENSG00000106789	CORO2A	0.005253	0	0	0	0	0	0	0	0
TCONS_00394336	XLOC_160074	XLOC_160074	0.115741	0	0	0	0	0	0	0	0
TCONS_00397532	XLOC_161396	XLOC_161396	0.075368	0	0	0	0	0	0	0	0
TCONS_00400217	ENSG00000184083	FAM120C	0.016479	0	0	0	0	0	0	0	0
TCONS_00403189	ENSG00000156500	FAM122C	0.032638	0	0	0	0	0	0	0	0
TCONS_00410826	XLOC_168199	XLOC_168199	0.076872	0	0	0	0	0	0	0	0
TCONS_00000820	XLOC_000608	XLOC_000608	15.0807	0	0	0	0	0	0	0	0
TCONS_00000834	XLOC_000608	XLOC_000608	41.9025	0	0	0	0	1.88468	0	1.88468	0
TCONS_00000815	XLOC_000608	XLOC_000608	24.0858	0	0	0	0.028083	0	0	0	0
TCONS_00000833	XLOC_000608	XLOC_000608	7.24943	0.033318	0.034662	0.022916	0.014906	0.070159	0	0.070159	0.005681
TCONS_00000861	XLOC_000615	XLOC_000615	1.96484	0.001005	0.023099	0.012295	0.028924	0.005513	0.004474	0.005513	0.001147
TCONS_00000483	XLOC_000356	XLOC_000356	0.416591	0.023632	0.006516	0	0	0.006359	0	0.006359	0
TCONS_00000477	XLOC_000353	XLOC_000353	0.559069	0	0	0	0	0.057058	0	0.057058	0.069469
TCONS_00022864	XLOC_009258	XLOC_009258	0.016766	0	0	0	0	0	0	0	0
TCONS_00036264	XLOC_014623	XLOC_014623	0.041038	0	0	0	0	0	0	0	0
TCONS_00038627	XLOC_015810	XLOC_015810	0.080695	0	0	0	0	0	0	0	0
TCONS_00064133	XLOC_026649	XLOC_026649	0.079637	0	0	0	0	0	0	0	0
TCONS_00087166	XLOC_035239	XLOC_035239	0.065778	0	0	0	0	0	0	0	0
TCONS_00103313	XLOC_041719	XLOC_041719	0.094552	0	0	0	0	0	0	0	0
TCONS_00175133	XLOC_066812	XLOC_066812	0.069729	0	0	0	0	0	0	0	0
TCONS_00180030	ENSG00000101638	ST8SIA5	0.024856	0	0	0	0	0	0	0	0
TCONS_00177522	XLOC_067927	XLOC_067927	0.068815	0.018879	0	0	0	0	0	0	0
TCONS_00221994	XLOC_083854	XLOC_083854	0.074334	0	0	0	0	0	0	0	0
TCONS_00222476	XLOC_084060	XLOC_084060	0.087548	0	0.016542	0	0	0	0	0	0
TCONS_00208764	XLOC_078357	XLOC_078357	0.078526	0	0	0	0	0.010979	0	0.010979	0
TCONS_00211041	XLOC_079348	XLOC_079348	0.009639	0	0	0	0	0	0	0	0
TCONS_00265402	XLOC_101748	XLOC_101748	0.085645	0	0	0	0	0	0	0	0
TCONS_00305876	XLOC_119713	XLOC_119713	0.035815	0	0	0	0	0	0	0	0
TCONS_00339121	XLOC_135423	XLOC_135423	0.166936	0	0	0	0	0	0	0	0
TCONS_00394497	XLOC_160228	XLOC_160228	0.10872	0	0	0	0	0	0	0	0
TCONS_00397782	XLOC_161544	XLOC_161544	0.065936	0	0	0	0	0	0	0	0
TCONS_00409252	XLOC_167267	XLOC_167267	0.075078	0	0	0	0	0	0	0	0
TCONS_00000150	XLOC_000104	XLOC_000104	0.072621	0	0	0	0	0	0	0	0

## Sheet: lncRNA_UV_cluster 2
transcript_id	gene_id	gene_name	C_0	UV_3	UV_6	UV_9	UV_12	UV_24	UV_48	UV_24	UV_96
ENST00000423796	ENSG00000235146	AC114498.1	0	0.009223	0	0	0	0	0	0	0
ENST00000586928	ENSG00000237491	AL669831.5	0	0.044826	0	0	0	0	0	0	0
ENST00000427046	ENSG00000237934	AL590729.1	0	0.013345	0	0	0	0	0	0	0
ENST00000447478	ENSG00000228634	AL136115.1	0	0.013594	0	0	0	0	0	0	0
ENST00000587696	ENSG00000225313	AL513327.1	0	0.006516	0	0	0	0	0	0	0
ENST00000443161	ENSG00000228436	AL139260.1	0	1.3e-05	0	0	0	0	0	0	0
ENST00000437753	ENSG00000229444	AL451062.1	0	0.006727	0	0	0	0	0	0	0
ENST00000624869	ENSG00000230615	AL139220.2	0	0.028188	0	0	0	0	0	0	0
ENST00000446686	ENSG00000232762	AL355483.3	0.003203	0.011995	0	0	0	0	0	0	0
ENST00000426999	ENSG00000235079	ZRANB2-AS1	0	0.013879	0	0.000393	0	0.000815	0	0.000815	0
ENST00000598739	ENSG00000228852	AC092802.2	0	0.004155	0	0	0	0	0	0	0
ENST00000624135	ENSG00000228852	AC092802.2	0	0.0034	0	0	0	0	0	0	0
ENST00000599469	ENSG00000234222	LIX1L-AS1	0	0.029667	0	0	0	0	0	0	0
ENST00000504583	ENSG00000250734	AL391335.1	0	0.032983	0	0	0	0	0	0	0
ENST00000648930	ENSG00000285651	AL450992.2	0	0.006085	0.001653	0	0	0	0	0	0
ENST00000429865	ENSG00000232995	AL592435.1	0.019275	0.066415	0	0	0	0	0	0	0
ENST00000443515	ENSG00000226330	AL606489.1	0	0.005824	0	0	0	0	0	0	0
ENST00000487977	ENSG00000203709	MIR29B2CHG	0.0014	0.032377	0	0	0	0	0.00311	0	0
ENST00000431307	ENSG00000226251	LINC02608	0	0.05194	0	0	0	0	0	0	0
ENST00000454321	ENSG00000232807	AL137186.2	0	0.008021	0	0	0	0	0	0	0
ENST00000446193	ENSG00000229751	AC044781.1	0	0.01071	0	0	0	0	0	0	0
ENST00000648484	ENSG00000285671	AL139405.1	0	0.007203	0	0	0	0	0	0	0
ENST00000436877	ENSG00000234504	AL353801.2	0	0.00616	0	0	0	0	0	0	0
ENST00000418818	ENSG00000270087	AC010997.3	0	0.000454	0	0	0	0	0	0	0
ENST00000445111	ENSG00000228280	AL731568.1	0	0.01505	0	0	0	0	0	0	0
ENST00000423770	ENSG00000230417	LINC00856	0	0.010652	0	0	0	0	0	0	0
ENST00000432070	ENSG00000230091	TMEM254-AS1	0	0.003059	0	0	0	0	0	0	0
ENST00000445458	ENSG00000233409	FANK1-AS1	0	0.012434	0	0	0	0	0	0	0
ENST00000381363	ENSG00000099869	IGF2-AS	0	0.004998	0	0	0	0	0	0	0
ENST00000648470	ENSG00000285562	AC090099.5	0	0.003437	0	0	0	0	0	0	0
ENST00000525963	ENSG00000246225	AC006299.1	0	0.039503	0	0	0	0	0	0	0
ENST00000528779	ENSG00000255272	AC113192.5	0	0.017559	0	0	0	0	0	0	0
ENST00000530042	ENSG00000255340	AC087276.3	0	0.001248	0	0	0	0.000334	0	0.000334	0
ENST00000429561	ENSG00000226627	SHANK2-AS1	0	0.003398	0	0	0	0	0	0	0
ENST00000545254	ENSG00000256633	AP005019.1	0	0.006461	0	0	0	0	0	0	0
ENST00000529304	ENSG00000254963	AP001972.2	0	0.050823	0	0	0	0	0	0	0
ENST00000527778	ENSG00000255100	AP003119.2	0.000726	0.132638	0.002152	0	0.000968	0.004039	0.001848	0.004039	0.021603
ENST00000533329	ENSG00000255503	AP001767.3	0	0.039428	0	0.008209	0	0	0	0	0
ENST00000560744	ENSG00000259290	AP001007.3	0	0.023958	0	0	0	0	0	0	0
ENST00000602376	ENSG00000175773	AP002986.1	0	0.005308	0	0	0	0	0	0	0
ENST00000537525	ENSG00000255750	AC022509.1	0	0.027479	0	0	0	0	0	0	0
ENST00000546523	ENSG00000257488	LINC02354	0	0.022468	0	0	0	0	0	0	0
ENST00000550909	ENSG00000257488	LINC02354	0	0.004958	0	0	0	0	0	0	0
ENST00000550530	ENSG00000257588	AC025154.2	0	0.168621	6.3e-05	0	0	0	0	0	0.003553
ENST00000618726	ENSG00000274797	AC008121.3	0	0.034623	0.007896	0	0	0	0	0	0
ENST00000453875	ENSG00000228630	HOTAIR	0	0.018817	0	0	0	0	0	0	0
ENST00000547552	ENSG00000258001	AC126614.1	0	0.013175	0	0	0	0	0	0	0
ENST00000509615	ENSG00000249753	AC084357.2	0	0.023224	0	0	0	0	0	0	0
ENST00000549359	ENSG00000258168	AC025569.1	0	0.001196	0	0	0	0	0	0	0
ENST00000542314	ENSG00000255857	PXN-AS1	4.6e-05	0.002788	1e-05	2.2e-05	0.0001	5e-05	0.000442	5e-05	0.000175
ENST00000539034	ENSG00000257097	CLIP1-AS1	0	0.019544	0	0	0	0	0	0	0
ENST00000443154	ENSG00000246394	AC073911.1	0	0.008107	0	0	0	0	0	0	0
ENST00000437698	ENSG00000230490	AL139383.1	0	0.016034	0	0	0	0	0	0	0
ENST00000606429	ENSG00000234377	RNF219-AS1	0	0.013561	0	0	0	0	0	0	0
ENST00000439790	ENSG00000233532	LINC00460	0	0.043598	0	0	0	0	0	0	0
ENST00000555580	ENSG00000259069	AL512310.9	0	0.014751	0	0	0	0	0	0	0
ENST00000622740	ENSG00000186960	LINC01551	0	0.003519	0	0	0	0	0	0	0
ENST00000546560	ENSG00000257126	FOXG1-AS1	0	0.011088	0	0	0	0	0	0	0
ENST00000549487	ENSG00000257126	FOXG1-AS1	0	0.018177	0	0	0	0	0	0	0
ENST00000555421	ENSG00000258525	AL049830.3	0	0.041152	0	0	0	0	0.014392	0	0
ENST00000553520	ENSG00000258940	AL132639.2	0	0.008305	0	0	0	0	0	0	0
ENST00000652650	ENSG00000286099	AL390800.1	0	0.014811	0	0	0	0	0	0	0
ENST00000553747	ENSG00000259129	LINC00648	0	4.1e-05	0	0	0	0	0	0	0
ENST00000554759	ENSG00000258662	AC022469.2	0	0.023563	0	0	0	0	0	0	0
ENST00000555444	ENSG00000258983	AL162171.3	0	0.003422	0	0	0	0	0	0	0
ENST00000560866	ENSG00000248079	DPH6-DT	0	0.044277	0	0	0	0	0	0	0
ENST00000499326	ENSG00000244879	GABPB1-AS1	0	1.3e-05	0	0	0	0	0	0	0
ENST00000560613	ENSG00000259709	AC023906.4	0	0.005318	0	0	0	0	0	0	0
ENST00000558905	ENSG00000259627	AC079328.2	0	0.037812	0	0	0	0	0	0	0
ENST00000559752	ENSG00000259473	LINC02205	0	0.062467	0	0	0	0	0	0	0.00201
ENST00000558086	ENSG00000259343	TMC3-AS1	0	0.002045	0	0	0	0	0	0	0
ENST00000559473	ENSG00000245479	LINC01585	0	0.022323	0	0	0	0	0	0	0
ENST00000649384	ENSG00000285543	AC022168.1	0	0.001003	0	0	0	0	0	0	0
ENST00000564016	ENSG00000260378	AC109597.1	0	0.007894	0	0	0	0	0	0	0
ENST00000566957	ENSG00000261293	AC007601.2	0	0.037175	0	0	0	0	0	0	0
ENST00000568971	ENSG00000261465	AC099518.4	0	0.157671	0	0	0	0	0	0	0
ENST00000414816	ENSG00000224310	LINC01567	0	0.00642	0	0	0	0	0	0	0
ENST00000563252	ENSG00000260219	AC106782.2	0.000257	0.002435	0.000289	0	0	0.000283	0	0.000283	0
ENST00000637882	ENSG00000283423	AC109462.3	0	0.011795	0	0	0	0	0	0	0
ENST00000648729	ENSG00000246379	AC007495.1	0	0.008487	0	0	0	0	0	0	0
ENST00000438344	ENSG00000235361	AC016292.1	0	0.016147	0	0	0	0	0	0	0
ENST00000575626	ENSG00000186594	MIR22HG	0	0.159375	0	0	0	0	0	0	0
ENST00000610106	ENSG00000186594	MIR22HG	0.055709	0.546075	0.120215	0	0	0	0	0	0
ENST00000608198	ENSG00000186594	MIR22HG	0	0.008167	0	0	0	0	0	0	0
ENST00000580194	ENSG00000233002	AC005324.1	0	0.007516	0	0	0	0	0	0	0
ENST00000583141	ENSG00000263394	AC007952.7	0	0.001212	0	0	0	0	0	0	0
ENST00000601694	ENSG00000235979	AC004448.2	0	0.001683	0	0	0	0	0	0	0
ENST00000577537	ENSG00000233098	CCDC144NL-AS1	0	0.005007	0	0	0	0	0	0	0
ENST00000580056	ENSG00000233098	CCDC144NL-AS1	0	0.001254	0	0	0	0	0	0	0
ENST00000584594	ENSG00000265265	AC233702.5	0	0.023563	0	0	0	0	0	0	0
ENST00000583787	ENSG00000264044	AC005726.2	0	0.001663	0	0	0	0	0	0	0
ENST00000614277	ENSG00000277268	LHX1-DT	0	0.001507	0	0	0	0	0	0	0
ENST00000612281	ENSG00000277268	LHX1-DT	0	0.001442	0	0	0	0	0	0	0
ENST00000621428	ENSG00000277268	LHX1-DT	0	0.005092	0	0	0	0	0	0	0
ENST00000584075	ENSG00000265121	AC068594.2	0	0.01563	0	0	0	0	0	0	0
ENST00000581471	ENSG00000263753	LINC00667	0.000305	0.517431	0.000326	0.0005	0.01297	0.000179	0.004872	0.000179	0.003159
ENST00000583081	ENSG00000266053	NDUFV2-AS1	0	0.05766	0	0	0	0	0	0	0.011734
ENST00000615734	ENSG00000275805	AC090206.1	0	0.002521	0	0	0	0	0	0	0
ENST00000591141	ENSG00000267583	AC007998.3	0	0.041501	0	0	0	0	0.006185	0	0
ENST00000589818	ENSG00000267762	AC048380.1	0	0.01414	0	0	0	0	0	0	0
ENST00000563553	ENSG00000260930	LINC01416	0	0.008079	0	0	0	0	0	0	0.001715
ENST00000587475	ENSG00000267766	AC022726.1	0	0.02885	0	0	0	0	0	0	0
ENST00000588380	ENSG00000266990	AC004528.1	0	0.011901	0	0	0	0	0	0	0
ENST00000592368	ENSG00000267231	AC005786.2	0	0.000333	0	0	0	0	0	0	0
ENST00000588342	ENSG00000267299	AC011444.3	0	0.009709	0	0	0	0	0	0	0
ENST00000595107	ENSG00000269813	AC010336.6	0	0.024237	0	0	0	0	0	0	0
ENST00000593792	ENSG00000268480	LINC01862	0	0.039068	0	0	0	0	0	0	0
ENST00000591596	ENSG00000267004	AC018761.1	0	0.042188	0	0	0.015172	0	0	0	0
ENST00000586248	ENSG00000261824	LINC00662	0	0.068356	0	0	0	0	0	0	0
ENST00000614138	ENSG00000275055	AC011468.5	0	0.001206	0	0	0	0	0	0	0
ENST00000590579	ENSG00000267421	AC005498.2	0	0.03222	0	0	0	0	0.0006	0	0
ENST00000596379	ENSG00000268307	LINC02560	0	0.016941	0	0	0	0	0	0	0
ENST00000412606	ENSG00000224184	MIR3681HG	0	0.04757	0	0	0	0.006373	0	0.006373	0
ENST00000429717	ENSG00000223754	AC008073.1	0	0.014186	0	0	0	0	0	0	0
ENST00000421904	ENSG00000224165	DNAJC27-AS1	0	0.004069	0	0	0	0	0	0	0
ENST00000438649	ENSG00000231312	MAP4K3-DT	0	5e-05	0	0	0	0	0	0	0
ENST00000450080	ENSG00000231336	AC017006.1	0	0.025256	0	0	0	0	0.000439	0	0
ENST00000625389	ENSG00000231890	DARS-AS1	0	0.022206	0	0	0	0	0	0	0
ENST00000422799	ENSG00000232377	AC016910.1	0	0.008831	0	0	0	0	0	0	0
ENST00000439050	ENSG00000227403	LINC01806	0	0.004	0	0	0	0	0	0	0
ENST00000446838	ENSG00000237750	AC011900.1	0	0.002313	0	0	0	0	0	0	0
ENST00000638199	ENSG00000236283	AC019197.1	0	0.002584	0	0	0	0	0	0	0
ENST00000587568	ENSG00000237298	TTN-AS1	0	0.009695	0	0	0	0	0	0	0
ENST00000421437	ENSG00000228509	AC006460.1	0	0.010158	0.000114	0	0	0	0	0	0
ENST00000621081	ENSG00000273975	RF00017	0	0.012245	0	0	0	0	0	0	0
ENST00000420418	ENSG00000234281	LANCL1-AS1	0	0.009801	0	0	0	0	0	0	0
ENST00000617699	ENSG00000227769	AC072062.1	0	0.015596	0	0	0	0	0.002819	0	0
ENST00000437897	ENSG00000227769	AC072062.1	0	0.009268	0	0	0	0	0	0	0
ENST00000439598	ENSG00000236432	AC097662.1	0	0.029763	0.000504	0.001596	0	0	0	0	0
ENST00000418739	ENSG00000228293	AL049712.1	0	0.0325	0	0	0	0	0	0	0
ENST00000558175	ENSG00000228422	LINC00687	0	0.03224	0	0	0	0	0	0	0
ENST00000421829	ENSG00000213742	ZNF337-AS1	0	0.074546	0	0	0	0	0	0	0
ENST00000412178	ENSG00000230613	HM13-AS1	0	0.241728	0	0	0	0	0	0	0
ENST00000619222	ENSG00000215386	MIR99AHG	0	0.002212	0	0	0	0	0	0	0
ENST00000597626	ENSG00000237945	LINC00649	0	0.007977	0	0	0	0	0	0	0
ENST00000427447	ENSG00000237945	LINC00649	0	0.004001	0	0	0	0	0.000512	0	0
ENST00000629969	ENSG00000281383	FP671120.5	0	0.003505	0	0	0	0	0	0	0
ENST00000458080	ENSG00000226471	Z93930.2	0	0.047162	0	0.00061	0.007325	0	0	0	0
ENST00000436294	ENSG00000239674	Z83839.2	0	0.016494	0	0	0	0	0	0	0
ENST00000400234	ENSG00000205853	RFPL3S	0	0.001345	0	0	0	0	0	0	0
ENST00000621921	ENSG00000205853	RFPL3S	0	0.02155	0	0	0	0.002904	0	0.002904	0
ENST00000419128	ENSG00000235237	Z82188.2	0	0.007734	0	0	0	0	0	0	0
ENST00000513758	ENSG00000249310	APOBEC3B-AS1	0	0.003314	0	0	0	0	0	0	0
ENST00000428171	ENSG00000228351	AC018832.1	0	0.020333	0	0	0	0	0	0	0
ENST00000430018	ENSG00000233153	UBE2E2-AS1	0	0.05622	0	0	0	0.007483	0	0.007483	0
ENST00000429681	ENSG00000235236	AC137630.2	0	0.157336	0	0.032072	0	0	0	0	0
ENST00000482609	ENSG00000241111	AC092040.1	0	0.005026	0	0	0	0	0	0	0
ENST00000468961	ENSG00000240549	THOC7-AS1	0	0.019849	0	0	0	0	0	0	0
ENST00000596659	ENSG00000244513	AC109587.1	0	0.034892	0	0	0	0	0	0	0
ENST00000468646	ENSG00000241163	LINC00877	0	0.001477	0	0	0	0	0	0	0
ENST00000646056	ENSG00000242808	SOX2-OT	0	0.003557	0	0	0	0	0	0	0
ENST00000647552	ENSG00000242808	SOX2-OT	0	0.002398	0	0	0	0	0	0	0
ENST00000426459	ENSG00000225473	ATP13A4-AS1	0	0.00365	0	0	0	0	0	0	0
ENST00000437597	ENSG00000233058	LINC00884	0	0.032487	0	0	0	0	0	0	0
ENST00000515186	ENSG00000251186	AC105345.2	0	0.010889	0	0	0	0	0	0	0
ENST00000516513	ENSG00000252322	RN7SKP244	0	0.00327	0	0	0	0	0	0	0
ENST00000513071	ENSG00000245293	AC096564.1	0.000618	0.005994	0	0	0	0	0	0	0
ENST00000506795	ENSG00000234492	RPL34-AS1	0	0.013062	0	0	0	0	0	0	0
ENST00000568324	ENSG00000261129	AC106871.1	0	0.009024	0	0	0	0	0	0	0
ENST00000512359	ENSG00000248890	HHIP-AS1	0	0.020754	0.002146	0	0	0	0	0	0
ENST00000507023	ENSG00000250131	AC078881.1	0	0.005088	0	0	0	0	0	0	0
ENST00000513255	ENSG00000248694	AC079226.1	0	0.008967	0	0	0	0	0	0	0
ENST00000564167	ENSG00000261360	AC010491.1	0	0.001285	0	0	0	0	0	0	0
ENST00000513673	ENSG00000248539	LINC02117	0	0.007375	0	0	0	0	0	0	0
ENST00000457499	ENSG00000233847	AC022445.1	0	0.004066	0	0	0	0	0	0	0
ENST00000514114	ENSG00000250802	ZBED3-AS1	0	0.034675	0	0	0	0	0.008613	0	0
ENST00000582657	ENSG00000265684	RN7SL378P	0	0.007828	0	0	0	0	0	0	0
ENST00000514011	ENSG00000248309	MEF2C-AS1	0	0.005976	0	0	0	0	0	0	0
ENST00000648597	ENSG00000248323	LUCAT1	0	0.034008	0	0	0	0	0	0	0.001817
ENST00000606089	ENSG00000271737	AC008608.2	0.013497	3.00558	0.029963	0.037262	0.016508	0.021001	0.033452	0.021001	0.01244
ENST00000518580	ENSG00000253417	LINC02159	0	0.01205	0	0	0.003971	0	0	0	0
ENST00000518357	ENSG00000235172	LINC01366	0	0.004372	0	0	0	0.00012	0	0.00012	0
ENST00000523005	ENSG00000253736	AC022217.3	0	0.005543	0	0	0	0.000328	0	0.000328	0
ENST00000518894	ENSG00000204758	AC008429.1	0	2e-05	5e-06	0	0	0	0	0	0
ENST00000366189	ENSG00000249684	AC106795.2	0	0.036399	0	0	0	0	0	0	0
ENST00000520163	ENSG00000253979	AC109479.3	0	0.019467	0	0	0	0	0	0	0
ENST00000651481	ENSG00000272168	CASC15	0	0.008583	0	0	0	0	0	0	0
ENST00000651620	ENSG00000272168	CASC15	0	0.053453	0	0	0	0	0	0	0.004701
ENST00000611838	ENSG00000225914	TSBP1-AS1	0	0.006987	0	0	0	0	0	0	0
ENST00000644884	ENSG00000225914	TSBP1-AS1	0	0.008175	0	0	0	0	0	0	0
ENST00000589549	ENSG00000226803	ZNF451-AS1	0	0.010857	0	0	0	0.002856	0	0.002856	0
ENST00000648796	ENSG00000260645	AL359715.2	0	0.037006	0	0	0	0	0	0	0
ENST00000525151	ENSG00000231889	TRAF3IP2-AS1	0	0.022879	0	0	0	0	0	0	0
ENST00000522697	ENSG00000228624	HDAC2-AS2	0	0.004618	0	0	0	0	0	0	0
ENST00000422700	ENSG00000228495	LINC01013	0	0.006583	0	0	0	0	0	0	0
ENST00000448942	ENSG00000237499	AL357060.1	0	0.004051	0	0	0	0	0	0	0
ENST00000454788	ENSG00000238099	LINC01625	0	0.018347	0.000766	0	0	0	0	0	0
ENST00000413845	ENSG00000227660	UST-AS1	0	0.000208	0	0	0	0	0	0	0
ENST00000480919	ENSG00000242474	AC093627.5	0	0.029806	0	0	0	0	0	0	0
ENST00000639380	ENSG00000283991	AC017000.1	0	0.001123	0	0	0	0	0	0	0
ENST00000420774	ENSG00000214870	AC004540.1	0	0.018813	0.003291	0	0	0	0	0	0
ENST00000414621	ENSG00000281404	LINC01176	0	0.072474	0	0	0	0	0	0	0
ENST00000479299	ENSG00000250614	AC005522.1	0	0.010299	0	0	0	0	0	0	0
ENST00000434531	ENSG00000225703	AC114737.1	0	0.010299	0	0	0	0	0	0	0
ENST00000398043	ENSG00000214293	APTR	1.4e-05	0.002731	4.6e-05	0	0	2e-06	8.5e-05	2e-06	5.2e-05
ENST00000420245	ENSG00000234459	AC002064.2	0	0.018064	0	0	0	0	0	0	0
ENST00000457510	ENSG00000241764	AC002467.1	0	0.08608	0	0	0	0	0	0	0.00065
ENST00000446355	ENSG00000237813	AC002066.1	0	0.032016	0	0.005183	0	0	0.006553	0	0
ENST00000643452	ENSG00000285106	AC016831.7	0	0.002351	0	0	0	0.000165	0	0.000165	0
ENST00000465466	ENSG00000240889	NDUFB2-AS1	0.484156	1.66785	0.007177	0.001404	0.020387	0.005211	0.012351	0.005211	0.005702
ENST00000529252	ENSG00000225725	FAM66E	0	0.013732	0	0	0	0	0	0	0
ENST00000533615	ENSG00000225725	FAM66E	0	0.000928	0	0	0	0	0	0	0
ENST00000518098	ENSG00000253641	AC104964.1	0	0.053422	0	0	0.003469	0	0	0	0
ENST00000523785	ENSG00000253974	NRG1-IT1	0	0.025079	0	0	0	0	0	0	0
ENST00000519660	ENSG00000253416	AC023200.1	0	0.011366	0	0	0	0	0	0	0
ENST00000523658	ENSG00000253539	AC018442.2	0	0.001392	0	0	0	0	0	0	0
ENST00000518090	ENSG00000253737	AP003469.3	0	0.047758	0	0	0	0	0	0	0
ENST00000517999	ENSG00000253320	AZIN1-AS1	0	0.007093	0	0	0	0	0	0	0
ENST00000442069	ENSG00000277631	PGM5P3-AS1	0	0.023058	0	0	0	0	0	0	0
ENST00000622412	ENSG00000277631	PGM5P3-AS1	0	0.001303	0	0	0	0	0	0	0
ENST00000421645	ENSG00000227914	AL136979.1	0	0.014463	0	0	0	0	0	0	0
ENST00000451340	ENSG00000237009	GLIS3-AS1	0	0.002076	0	0	0	0	0	0	0
ENST00000429818	ENSG00000204802	AL590399.1	0	0.163501	0	0	0	0	0	0	0
ENST00000592778	ENSG00000233178	AL161457.2	0	0.01148	0	0	0	0	0	0	0
ENST00000411080	ENSG00000223012	RN7SKP264	0	0.02131	0	0	0	0	0	0	0
ENST00000366109	ENSG00000203279	AL590705.1	0	0.048431	0	0	0	0	0	0	0.012465
ENST00000435485	ENSG00000234323	LINC01505	0	0.056539	0	0	0	0	0	0	0
ENST00000425709	ENSG00000234323	LINC01505	0	0.012587	0	0.000489	0	0	0	0	0
ENST00000423637	ENSG00000236461	AL162425.1	0	0.036651	0	0.001831	0.003024	0	0	0	0
ENST00000496793	ENSG00000203993	ARRDC1-AS1	0	2.7e-05	0	0	1e-06	8e-06	0	8e-06	0
ENST00000424650	ENSG00000224204	PHEX-AS1	0	0.014687	0	0	0	0	0.004917	0	0
ENST00000455438	ENSG00000226484	AL606516.1	0	0.021763	0	0	0	0	0	0	0
ENST00000424211	ENSG00000231651	DLG3-AS1	0	0.004245	0	0	0	0	0	0	0
ENST00000602985	ENSG00000225470	JPX	0	1.31247	0	0	0	0	0	0	0
ENST00000602441	ENSG00000270050	AL035427.1	0	0.00016	0	0	0	0	0	0	0
ENST00000413328	ENSG00000229269	AL451048.1	0	0.013517	0	0	0	0	0	0	0
ENST00000438791	ENSG00000227169	Z98747.1	0	0.013473	0	0	0	0	0	0	0
ENST00000641892	ENSG00000284653	AL357509.1	0	0.009271	0	0	0	0	0	0	0
ENST00000425205	ENSG00000224311	AL590640.1	0	0.013794	0	0	0	0	0	0	0
ENST00000426794	ENSG00000230285	AC092807.1	0	0.012807	0.000824	0	0	0	0	0	0
ENST00000442712	ENSG00000235021	AL591848.2	0	0.010391	0	0	0	0	0	0	0
ENST00000648759	ENSG00000285630	AL590068.3	0	0.010271	0	0	0	0	0	0	0
ENST00000442783	ENSG00000227313	LINC02630	0	0.005636	0	0	0	0	0	0	0
ENST00000428814	ENSG00000231705	AL451069.2	0	0.022935	0	0	0	0	0	0	0
ENST00000418574	ENSG00000255871	AC007529.1	0	0.004256	0	0	0	0	0	0	0
ENST00000650080	ENSG00000258140	AC127894.1	0	0.004767	0	0	0	0	0	0	0
ENST00000619983	ENSG00000276693	AC138466.3	0	0.004785	0	0	0	0	0	0	0
ENST00000555636	ENSG00000259072	AL161751.1	0	0.023956	0	0.007599	0	0	0	0	0
ENST00000651006	ENSG00000251363	LINC02315	0	0.012584	0	0	0	0	0	0	0
ENST00000556405	ENSG00000258998	LINC02302	0	0.003213	0	0	0	0	0	0	0
ENST00000570038	ENSG00000260071	AC007221.1	0	0.009049	0	0	0	0	0	0	0
ENST00000569557	ENSG00000260958	AC023824.3	0	0.005129	0	0	0	0	0	0	0
ENST00000561523	ENSG00000261623	LINC02179	0	0.00254	0	0	0	0	0	0	0
ENST00000614400	ENSG00000277200	AC005696.4	0	0.008905	0	0	0	0	0	0	0
ENST00000585025	ENSG00000265046	AC004253.2	0	0.023504	0	0	0	0	0	0	0
ENST00000579327	ENSG00000264622	AC022903.1	0	0.036358	0	0	0	0	0	0	0
ENST00000565120	ENSG00000261514	LINC01976	0	0.064285	0	0	0	0	0	0	0
ENST00000515692	ENSG00000248954	AC027801.1	0	0.008566	0	0	0	0	0	0	0
ENST00000392620	ENSG00000182352	C17orf77	0	0.007391	0	0	0	0	0	0	0
ENST00000412816	ENSG00000132204	LINC00470	0	0.004502	0	0	0	0	0	0	0
ENST00000589068	ENSG00000267586	LINC00907	0	0.004596	0	0	0	0	0	0	0
ENST00000580622	ENSG00000264634	AC100844.1	0	0.001606	0	0	0	0	0	0	0
ENST00000588685	ENSG00000166770	ZNF667-AS1	0	0.012978	0	0	0	0	0	0	0
ENST00000648803	ENSG00000234275	AC017053.1	0	0.004987	0	0	0	0	0	0	0
ENST00000474561	ENSG00000240980	AC093904.1	0	0.00667	0	0	0	0	0	0	0
ENST00000455896	ENSG00000228973	AC009955.1	0	0.020161	0	0	0	0	0	0	0
ENST00000433952	ENSG00000232837	LINC01700	0	0.005839	0	0	0	0	0	0	0
ENST00000428410	ENSG00000224100	AP001630.1	0	0.02057	0	0	0	0	0	0	0
ENST00000430468	ENSG00000231405	AL008638.1	0	0.019727	0	0	0	0	0	0	0
ENST00000603530	ENSG00000187012	LINC00207	0	0.014624	0	0	0	0	0	0	0
ENST00000623207	ENSG00000279727	LINC02033	0	0.004439	0	0	0	0	0	0	0
ENST00000460535	ENSG00000243544	RN7SL172P	0	0.010368	0	0	0	0	0	0	0
ENST00000603299	ENSG00000270321	AC007953.2	0	0.015263	0	0	0	0	0	0	0
ENST00000503163	ENSG00000250098	AC007370.1	0	0.012423	0	0	0	0	0	0	0
ENST00000510705	ENSG00000250039	AC096719.1	0	0.00036	0	0	0	0	0	0	0
ENST00000652064	ENSG00000286150	AC097459.1	0	0.006961	0	0	0	0	0	0	0
ENST00000626286	ENSG00000280711	JADRR	0.004578	0.016211	0	0	0	0	0	0	0
ENST00000504874	ENSG00000250357	AC108935.1	0	0.020682	0	0	0	0	0	0	0
ENST00000508790	ENSG00000250263	LINC02509	0	0.023766	0	0	0	0	0	0	0
ENST00000503367	ENSG00000248757	LINC02115	0	0.008215	0	0	0	0	0	0	0
ENST00000501695	ENSG00000247199	AC091948.1	0	0.013769	0	0.002946	0	0	0	0	0
ENST00000511921	ENSG00000250274	AC034199.1	0	0.003244	0	0	0	0	0	0	0
ENST00000419796	ENSG00000233656	AL445430.1	0	0.036334	0	0	0	0	0	0	0
ENST00000423149	ENSG00000242753	AL445430.2	0	0.009393	0	0	0	0	0	0	0
ENST00000641122	ENSG00000284656	AL645937.4	0	0.00237	0	0	0	0	0	0	0
ENST00000432330	ENSG00000225391	AL135902.1	0	0.006876	0	0	0	0	0	0	0
ENST00000242109	ENSG00000122548	KIAA0087	0	0.002179	0	0	0	0	0	0	0
ENST00000563054	ENSG00000260653	AC237221.1	0	0.003166	0	0	0	0	0	0	0
ENST00000570437	ENSG00000274135	RF00017	0	0.013951	0	0	0	0	0	0	0
ENST00000612422	ENSG00000277526	AC245123.1	0	0.005428	0	0	0	0	0	0	0
ENST00000530194	ENSG00000246528	AC079089.1	0	0.005143	0	0	0	0	0	0	0
ENST00000519844	ENSG00000253824	AP003472.1	0	0.021734	0	0	0	0	0	0	0
ENST00000476271	ENSG00000242315	RN7SL685P	0	0.031312	0	0	0	0	0	0	0
ENST00000519500	ENSG00000253433	AC083843.1	0	0.052168	0	0	0	0	0	0	0
ENST00000621296	ENSG00000277350	AL353770.4	0	0.016574	0	0	0	0.001273	0	0.001273	0
ENST00000442072	ENSG00000233081	AL353764.1	0	0.023992	0	0	0	0	0	0	0
ENST00000422048	ENSG00000228933	AC107419.1	0	0.003675	0	0	0	0	0	0	0
ENST00000447651	ENSG00000223486	AC092198.1	0	0.006889	0	0	0	0	0	0	0
ENST00000411474	ENSG00000229967	MAGEA4-AS1	0	0.010978	0	0	0	0	0	0	0
TCONS_00023364	XLOC_009440	XLOC_009440	0	0.082139	0	0	0	0	0.020132	0	0
TCONS_00005562	ENSG00000116885	OSCP1	0	0.062206	0	0	0	0	0	0	0
TCONS_00008466	ENSG00000033122	LRRC7	0	0.33541	0	0	0	0	0	0	0
TCONS_00008784	ENSG00000184005	ST6GALNAC3	0	0.124969	0	0	0	0	0	0	0
TCONS_00009230	ENSG00000117174	ZNHIT6	0	0.018347	0	0	0	0	0	0	0
TCONS_00009415	XLOC_003845	XLOC_003845	0	0.125446	0	0	0	0	0	0	0
TCONS_00030138	ENSG00000081026	MAGI3	0	0.14608	0	0	0	0	0	0	0
TCONS_00031924	ENSG00000197622	CDC42SE1	0	0.028287	0.000802	0	0	0	0.000122	0	0.007229
TCONS_00016034	ENSG00000143344	RGL1	0	0.129583	0	0	0	0	0	0	0
TCONS_00036344	ENSG00000196550	FAM72A	0	0.289765	0	0	0	0	0	0	0
TCONS_00018300	XLOC_007427	XLOC_007427	0	0.097455	0	0.014396	0	0	0	0	0
TCONS_00018843	ENSG00000143786	CNIH3	0.003344	0.079285	0	0	0	0	0	0	0
TCONS_00018902	ENSG00000154380	ENAH	0.023071	2.89251	0.660128	0.01173	0.011107	0.007408	0	0.007408	0.006614
TCONS_00040895	XLOC_016844	XLOC_016844	0.012211	0.044826	0	0	0	0	0	0	0
TCONS_00045511	ENSG00000120051	CFAP58	0.00311	0.181073	0.003705	0.001137	0.002757	0.003077	0	0.003077	0
TCONS_00054119	ENSG00000203805	PLPP4	0	0.154066	0	0.020756	0	0	0	0	0
TCONS_00067243	ENSG00000239920	AC104389.4	0.033975	0.119474	0	0	0	0	0	0	0
TCONS_00069540	ENSG00000110436	SLC1A2	0	0.036176	0	0	0	0	0	0	0.007809
TCONS_00069672	XLOC_028598	XLOC_028598	0.002118	0.099521	0	0	0.010415	0	0	0	0
TCONS_00061258	ENSG00000172613	RAD9A	0	0.127222	0	0	0	0	0	0	0
TCONS_00073124	ENSG00000149716	LTO1	0	1.90027	0	0	0	0	0.020505	0	0
TCONS_00063986	XLOC_026549	XLOC_026549	0	0.132355	0	0	0	0	0	0	0
TCONS_00065321	ENSG00000149403	GRIK4	0.000403	0.065968	0	0	0	0	0.000754	0	0
TCONS_00091036	ENSG00000134532	SOX5	0	0.131894	0	0	0	0	0	0	0
TCONS_00091876	ENSG00000139174	PRICKLE1	0	0.097736	0	0	0	0	0	0	0
TCONS_00094671	ENSG00000198673	FAM19A2	0	0.489798	0	0	0	0	0	0	0
TCONS_00086516	ENSG00000139438	FAM222A	0	0.164744	0	0.000555	0	0	0	0	0
TCONS_00097531	ENSG00000122986	HVCN1	0	0.031031	0	0.001078	0	0	0	0	0
TCONS_00098806	ENSG00000184445	KNTC1	0	0.083969	0	0	0	0	0	0	0
TCONS_00104473	ENSG00000122033	MTIF3	0.003711	0.046469	0	0	0	0	0	0	0.011495
TCONS_00104819	XLOC_042434	XLOC_042434	0	0.084432	0	0	0	0	0	0	0
TCONS_00108992	ENSG00000129460	NGDN	0	0.065852	0	0	0	0	0	0	0.006665
TCONS_00116151	ENSG00000136305	CIDEB	0	0.021124	0	0	0	0	0	0	0
TCONS_00116525	ENSG00000151322	NPAS3	0.012423	0.146818	0	0	0	0	0	0	0.020096
TCONS_00117550	ENSG00000198252	STYX	0	0.944965	0	0	0	0	0	0	0
TCONS_00122202	ENSG00000114062	UBE3A	0	0.082272	0	0	0	0	0	0	0
TCONS_00122700	ENSG00000198838	RYR3	0	1.22344	0	0	0	0	0	0	0
TCONS_00123914	XLOC_050433	XLOC_050433	0.00834	0.178218	0	0	0	0	0	0	0
TCONS_00130429	ENSG00000137872	SEMA6D	0	0.081494	0	0	0	0	0	0	0
TCONS_00131119	ENSG00000285253	AC090517.4	0	0.153589	0	0	0	0	0	0	0
TCONS_00131122	ENSG00000285253	AC090517.4	0.007326	0.080775	0	0	0	0	0.002587	0	0
TCONS_00149473	XLOC_058741	XLOC_058741	0	0.042451	0	0	0	0	0	0	0
TCONS_00143488	ENSG00000167515	TRAPPC2L	0	0.098428	0	0	0	0	0	0	0.035527
TCONS_00153868	ENSG00000154957	ZNF18	0	0.053524	0	0	0	0	0	0	0
TCONS_00155209	XLOC_060536	XLOC_060536	0	0.059942	0	0	0	0	0	0	0
TCONS_00155832	XLOC_060720	XLOC_060720	0	0.130853	0.032424	0	0	0	0	0	0
TCONS_00173103	ENSG00000171302	CANT1	0	0.848967	0.044941	0	4.1e-05	0	0	0	0
TCONS_00173907	XLOC_066309	XLOC_066309	0	0.213759	0.002765	0	0	0	0	0	0
TCONS_00162814	ENSG00000175711	B3GNTL1	0	0.091034	0	0	0	0.020442	0	0.020442	0
TCONS_00178451	ENSG00000154864	PIEZO2	0.005743	0.246544	0	0	0	0.000748	0	0.000748	0.056687
TCONS_00178457	ENSG00000154864	PIEZO2	0.007352	0.131922	0.007329	0	0.008277	0	0	0	0.003541
TCONS_00178454	ENSG00000154864	PIEZO2	0.002223	0.112386	0	0.007216	0.005698	0	0	0	0.005759
TCONS_00178494	ENSG00000141404	GNAL	0	0.120485	0	0	0	0	0	0	0.0062
TCONS_00180235	XLOC_069154	XLOC_069154	0	0.110826	0	0	0	0	0	0	0
TCONS_00194555	ENSG00000125726	CD70	0	0.11452	0	0	0.024819	0	0	0	0.017836
TCONS_00184556	ENSG00000213297	ZNF625-ZNF20	0	0.074903	0.010023	0	0	0	0	0	0
TCONS_00200261	ENSG00000176531	PHLDB3	0	0.139889	0	0	0.002876	0.011724	0.006808	0.011724	0.00235
TCONS_00189809	ENSG00000213889	PPM1N	0	0.09638	0	0	0	0	0	0	0
TCONS_00200807	ENSG00000010310	GIPR	0	0.104769	0	0	0	0	0	0	0
TCONS_00201232	XLOC_075523	XLOC_075523	0	0.208501	0.023398	0	0	0	0	0	0
TCONS_00201234	XLOC_075523	XLOC_075523	0	0.200485	0	0	0	0	0	0	0
TCONS_00190289	XLOC_072467	XLOC_072467	0	0.465477	0.077935	0	0.027679	0	0.022932	0	0.010175
TCONS_00201235	XLOC_075523	XLOC_075523	0	0.122896	0.022901	0.012935	0.001561	0	0	0	0
TCONS_00192447	XLOC_073029	XLOC_073029	0	0.080641	0	0	0	0	0	0	0
TCONS_00220490	XLOC_083273	XLOC_083273	0	0.27172	0	0	0	0	0	0	0
TCONS_00205084	ENSG00000143970	ASXL2	0	0.080917	0	0	0	0	0	0	0
TCONS_00225815	ENSG00000115514	TXNDC9	0	0.000437	0	0	0	0	0	0	0
TCONS_00230691	XLOC_087642	XLOC_087642	0.020697	0.154872	0	0	0	0	0	0	0.012445
TCONS_00230982	ENSG00000198130	HIBCH	0	0.16879	0	0	0	0	0	0	0
TCONS_00217370	XLOC_082000	XLOC_082000	0	0.096731	0.012985	0	0	0.002606	0	0.002606	0
TCONS_00218089	ENSG00000156973	PDE6D	0	0.549251	0	0	0	0	0	0	0
TCONS_00233848	XLOC_089048	XLOC_089048	0	0.080923	0	0	0	0	0	0	0
TCONS_00238126	XLOC_090776	XLOC_090776	0	0.087797	0	0.013499	0	0.007326	0	0.007326	0
TCONS_00238135	ENSG00000101096	NFATC2	0	0.007628	0	0	0	0	0	0	0
TCONS_00243443	ENSG00000101146	RAE1	0	0.143491	0	0	0.045479	0	0	0	0
TCONS_00244911	XLOC_093875	XLOC_093875	0	0.935596	0	0	0	0	0.154096	0	0
TCONS_00250068	XLOC_096135	XLOC_096135	0	0.084965	0	0	0	0	0	0	0
TCONS_00270922	ENSG00000144455	SUMF1	0	0.421289	0	0	0	0	0	0	0
TCONS_00273580	ENSG00000012223	LTF	0	0.05707	0	0	0	0	0	0	0
TCONS_00262398	XLOC_100400	XLOC_100400	0	0.1015	0	0.016709	0.012821	0.005723	0	0.005723	0
TCONS_00264088	XLOC_101116	XLOC_101116	0.012082	0.089721	0	0	0	0	0	0	0.00399
TCONS_00265851	XLOC_101923	XLOC_101923	0	0.103523	0	0	0	0	0	0	0
TCONS_00278948	ENSG00000172765	TMCC1	0	0.451131	0	0	0.001873	0	0	0	0
TCONS_00266505	ENSG00000129048	ACKR4	0	0.12324	0	0	0	0	0	0	0
TCONS_00279374	ENSG00000174579	MSL2	0.000663	0.323759	0	0.000463	0.000357	0.001182	0.000563	0.001182	0.000749
TCONS_00279839	ENSG00000181804	SLC9A9	0	0.115713	0	0	0	0	0	0	0
TCONS_00269719	ENSG00000177383	MAGEF1	0	0.875691	0	0	0	0	0	0	0
TCONS_00292636	ENSG00000184985	SORCS2	0	0.097198	0	0	0	0.00309	0.011281	0.00309	0.006004
TCONS_00292755	XLOC_113371	XLOC_113371	0	0.075905	0	0	0	0	0	0	0
TCONS_00284779	ENSG00000109743	BST1	0	0.05108	0	0	0	0	0	0	0
TCONS_00285960	ENSG00000075539	FRYL	0	0.123726	0	0	0	0.014776	0	0.014776	0
TCONS_00286859	XLOC_110635	XLOC_110635	0.000475	0.145984	0	0	0	0	0	0	0
TCONS_00295718	XLOC_114918	XLOC_114918	0	0.08915	0	0	0	0	0	0	0
TCONS_00287631	ENSG00000138639	ARHGAP24	0	0.134321	0	0.012737	0	0	0	0	0
TCONS_00289786	ENSG00000109458	GAB1	0	0.150304	0	0	0	0	0	0	0
TCONS_00289881	XLOC_111992	XLOC_111992	0	0.092315	0.003265	0	0	0	0	0	0
TCONS_00299503	XLOC_116545	XLOC_116545	0	0.085606	0	0	0	0	0	0	0
TCONS_00300874	ENSG00000164151	ICE1	0	0.001445	0	0	0	0	0	0	0
TCONS_00301012	ENSG00000124275	MTRR	0	0.050936	0	0	0	0	0	0	0
TCONS_00313377	ENSG00000168621	GDNF	0.002612	0.231135	0	0	0	0.003745	0	0.003745	0.001662
TCONS_00304551	ENSG00000284762	AC022414.1	0	0.004934	0	0	0	0	0	0	0
TCONS_00315733	ENSG00000164300	SERINC5	0	0.010718	0	0	0	0	0	0	0
TCONS_00306092	XLOC_119863	XLOC_119863	0	0.090593	0	0.006192	0	0	0	0	0
TCONS_00306947	XLOC_120262	XLOC_120262	0	0.085699	0	0.009806	0	0	0	0	0
TCONS_00319370	ENSG00000178913	TAF7	0.014076	5.01425	0	0	0	0	0.000712	0	0
TCONS_00308694	XLOC_120930	XLOC_120930	0	0.130518	0	0	0	0.00629	0	0.00629	0
TCONS_00308712	ENSG00000183775	KCTD16	0	0.05024	0	0	0	0	0	0	0
TCONS_00309374	ENSG00000155506	LARP1	0.005101	0.081139	0	0	0	0	0	0	0
TCONS_00310289	XLOC_121574	XLOC_121574	0	0.140435	0	0	0.030263	0	0	0	0
TCONS_00311404	XLOC_121961	XLOC_121961	0	0.097878	0	0	0.00629	0	0	0	0
TCONS_00334644	ENSG00000180573	HIST1H2AC	0	31.9441	2.0304	0	0	0	0.086486	0	0
TCONS_00326925	XLOC_129205	XLOC_129205	0	0.099001	0	0	0	0	0	0	0
TCONS_00328237	XLOC_129948	XLOC_129948	0	0.080328	0	0	0	0	0	0	0
TCONS_00338505	ENSG00000112695	COX7A2	3.04365	20.7593	0.013135	0.016058	0.005805	0.026629	0.01187	0.026629	0.019088
TCONS_00328546	XLOC_130186	XLOC_130186	0	0.001682	0	0	0	0	0	0	0
TCONS_00328710	XLOC_130263	XLOC_130263	0.005057	0.118231	0	0.002948	0	0	0.010116	0	0
TCONS_00339446	XLOC_135571	XLOC_135571	0	0.147191	0	0.018368	0	0	0	0	0
TCONS_00329049	XLOC_130473	XLOC_130473	0	0.089721	0	0	0	0	0	0	0
TCONS_00330231	XLOC_131139	XLOC_131139	0	0.074394	0.000619	0.004129	0	0	0.022266	0	0.000369
TCONS_00330285	ENSG00000170162	VGLL2	0	0.021853	0	0	0	0	0	0	0
TCONS_00330423	XLOC_131257	XLOC_131257	0	0.096715	0	0	0	0.007346	0	0.007346	0.004102
TCONS_00341715	ENSG00000118515	SGK1	0	0.006	0	0	0	0	0	0	0
TCONS_00342312	XLOC_136999	XLOC_136999	0	0.124478	0	0	0	0	0	0	0.044359
TCONS_00331575	ENSG00000010818	HIVEP2	0	0.195758	0	0	0	0.018034	0.00416	0.018034	0.040716
TCONS_00343350	ENSG00000112541	PDE10A	0	0.074257	0	0	0	0.009082	0	0.009082	0
TCONS_00345917	XLOC_138505	XLOC_138505	0	0.156824	0	0	0	0	0	0	0
TCONS_00358319	ENSG00000127946	HIP1	0	0.035008	0	0.006377	0	0.000989	0	0.000989	0.00214
TCONS_00348858	XLOC_139896	XLOC_139896	0	0.096862	0	0	0	0	0	0	0
TCONS_00360872	XLOC_144491	XLOC_144491	0	0.138344	0	0	0	0.001876	0	0.001876	0.031307
TCONS_00350810	ENSG00000128573	FOXP2	0.017579	0.060373	0	0	0	0	0	0	0
TCONS_00362148	ENSG00000181072	CHRM2	0	0.084444	0	0	0	0	0	0	0
TCONS_00363256	ENSG00000106617	PRKAG2	0.010631	0.103157	0	0.001776	0.007151	0	0.010401	0	0.00492
TCONS_00375167	ENSG00000198846	TOX	0	0.123761	0	0.029233	0	0	0	0	0
TCONS_00378085	XLOC_152440	XLOC_152440	0.003923	0.058402	0	0	0.010689	0	0	0	0.004154
TCONS_00389477	ENSG00000178445	GLDC	0	0.022114	0	0	0	0	0	0	0
TCONS_00382134	XLOC_154292	XLOC_154292	0.003848	0.100219	0	0	0	0	0	0	0
TCONS_00391331	ENSG00000168795	ZBTB5	0	0.262228	0	0	0	0	0	0	0
TCONS_00392095	ENSG00000107282	APBA1	0.005369	0.077091	0	0	0	0.013523	0.001151	0.013523	0.003804
TCONS_00392572	XLOC_159217	XLOC_159217	0.026909	0.101424	0	0	0	0	0	0	0
TCONS_00385073	ENSG00000165244	ZNF367	0	0.205576	0	0.05768	0	0	0	0	0
TCONS_00385731	ENSG00000148143	ZNF462	0	0.105263	0.008801	0	0	0	0	0	0.006862
TCONS_00396002	XLOC_160842	XLOC_160842	0	0.000413	0	0	0	0	0	0	0
TCONS_00400640	ENSG00000131080	EDA2R	0	0.077147	0	0	0	0	0	0	0
TCONS_00403872	XLOC_164626	XLOC_164626	0.04084	5.49783	0.711644	0.463967	0.014593	0.026543	0	0.026543	0.027575
TCONS_00412137	XLOC_168823	XLOC_168823	0	0.082575	0	0	0	0	0	0	0
TCONS_00000904	XLOC_000653	XLOC_000653	0	0.01994	0	0	0	0	0	0	0
TCONS_00000313	XLOC_000209	XLOC_000209	0	92.5177	0	0	0	0	0	0	0
TCONS_00034992	XLOC_013972	XLOC_013972	0	0.105066	0	0	0	0	0	0	0
TCONS_00017754	XLOC_007169	XLOC_007169	0	0.098741	0	0	0	0	0	0	0.010982
TCONS_00070425	XLOC_028923	XLOC_028923	0	0.126095	0	0	0	0	0	0	0
TCONS_00063883	XLOC_026499	XLOC_026499	0	0.088867	0	0	0	0	0	0	0
TCONS_00090524	XLOC_036309	XLOC_036309	0	0.119344	0	0	0	0	0	0	0
TCONS_00091685	XLOC_036818	XLOC_036818	0	0.102687	0	0	0	0	0	0	0
TCONS_00092053	XLOC_037001	XLOC_037001	0	0.082212	0	0	0	0	0	0	0
TCONS_00106513	XLOC_043211	XLOC_043211	0	0.13858	0	0	0	0	0	0	0
TCONS_00106694	XLOC_043350	XLOC_043350	0	0.117901	0.014277	0	0	0	0	0	0
TCONS_00108204	XLOC_044279	XLOC_044279	0	0.087615	0	0	0	0.011027	0	0.011027	0.012544
TCONS_00151645	XLOC_059383	XLOC_059383	0	0.088867	0	0	0	0	0	0	0
TCONS_00180324	XLOC_069174	XLOC_069174	0	0.131309	0	0	0	0	0	0	0
TCONS_00186552	XLOC_071335	XLOC_071335	0	0.088177	0	0	0	0	0.031544	0	0
TCONS_00220642	XLOC_083354	XLOC_083354	0	0.087206	0	0	0	0	0	0	0
TCONS_00212235	XLOC_079874	XLOC_079874	0	0.079077	0	0	0	0	0	0	0
TCONS_00231166	XLOC_087907	XLOC_087907	0	0.107253	0	0	0	0	0	0	0
TCONS_00277130	XLOC_106473	XLOC_106473	0	0.110253	0	0	0	0	0	0	0
TCONS_00267455	XLOC_102639	XLOC_102639	0	0.088151	0	0	0	0	0	0	0
TCONS_00280404	XLOC_107902	XLOC_107902	0	0.083313	0	0	0	0	0	0	0
TCONS_00296221	XLOC_115154	XLOC_115154	0	0.088029	0	0	0	0	0	0	0
TCONS_00298897	XLOC_116229	XLOC_116229	0	0.078084	0	0	0	0	0	0	0
TCONS_00290169	XLOC_112154	XLOC_112154	0	0.1085	0	0	0	0	0	0	0
TCONS_00291836	XLOC_113018	XLOC_113018	0	0.130307	0	0	0	0	0	0	0
TCONS_00312732	XLOC_122724	XLOC_122724	0	0.088867	0	0	0	0	0	0	0
TCONS_00314408	XLOC_123603	XLOC_123603	0	0.159655	0	0	0	0	0	0	0
TCONS_00316016	XLOC_124401	XLOC_124401	0	0.102607	0	0	0	0	0	0	0.02508
TCONS_00317949	XLOC_125484	XLOC_125484	0	0.08044	0	0	0	0	0	0	0
TCONS_00319852	XLOC_126241	XLOC_126241	0	0.096946	0	0	0	0	0	0	0
TCONS_00322730	XLOC_127477	XLOC_127477	0	0.11241	0	0.007741	0	0	0	0	0
TCONS_00323496	XLOC_127853	XLOC_127853	0	0.078944	0	0	0	0	0.024335	0	0
TCONS_00326484	ENSG00000112619	PRPH2	0.011938	0.13245	0	0	0	0	0	0	0
TCONS_00331238	XLOC_131697	XLOC_131697	0	0.123917	0	0.037879	0	0	0	0	0
TCONS_00343083	XLOC_137381	XLOC_137381	0	0.148112	0	0	0	0.031697	0	0.031697	0.018214
TCONS_00395173	XLOC_160554	XLOC_160554	0	0.123707	0	0	0	0.014958	0	0.014958	0
TCONS_00398006	XLOC_161630	XLOC_161630	0	0.104452	0	0	0	0	0	0	0
TCONS_00398455	XLOC_161808	XLOC_161808	0	0.149804	0	0.008274	0	0	0	0	0.015478
TCONS_00406004	XLOC_165636	XLOC_165636	0	0.111322	0	0	0	0.025035	0	0.025035	0

## Sheet: lncRNA_UV_cluster 3
transcript_id	gene_id	gene_name	C_0	UV_3	UV_6	UV_9	UV_12	UV_24	UV_48	UV_24	UV_96
ENST00000434264	ENSG00000237491	AL669831.5	0	0	0.000164	0	0	0	0	0	0
ENST00000442483	ENSG00000234396	AL590822.1	0	0	0.028346	0	0	0	0	0	0.012759
ENST00000449895	ENSG00000232912	RERE-AS1	0	0	0.000661	0	0	0	0	0	0
ENST00000641619	ENSG00000284735	AL139424.3	0	0	0.010077	0	0	0	0	0	0
ENST00000591929	ENSG00000235790	AC114488.2	0	0	0.048597	0	0.00339	0	0	0	0
ENST00000373604	ENSG00000224066	AL049795.1	0.02162	0	0.076428	0	0	0	0.017915	0	0
ENST00000448134	ENSG00000233775	AL109945.1	0	0	0.02288	0	0	0	0	0	0
ENST00000418985	ENSG00000228237	EFCAB14-AS1	0	0	0.003325	0	0	0	0	0	0
ENST00000428794	ENSG00000228369	TXNDC12-AS1	0.008061	0	0.014368	0	0	0	0	0	0
ENST00000436033	ENSG00000233203	DHCR24-DT	0	0	0.026507	0	0	0	0	0	0
ENST00000641502	ENSG00000260971	AC119674.1	0	0	0.002351	0	0	0	0	0	0
ENST00000641876	ENSG00000260971	AC119674.1	0	0	0.006875	0	0	0	0	0	0
ENST00000436206	ENSG00000233099	AC095030.1	0	0	0.024511	0	0	0	0	0	0
ENST00000644783	ENSG00000285361	AL844170.1	0	0	0.003972	0	0.001408	0	0	0	0
ENST00000469312	ENSG00000267272	LINC01140	0	0	0.024778	0	0	0	0	0	0
ENST00000412239	ENSG00000234222	LIX1L-AS1	0	0	0.006249	0	0	0	0	0	0
ENST00000597144	ENSG00000234222	LIX1L-AS1	0	0	0.008114	0	0	0	0	0	0
ENST00000598354	ENSG00000234222	LIX1L-AS1	0	0	0.032706	0.00753	0	0	0.001938	0	0
ENST00000432858	ENSG00000227673	AL162734.1	0	0	0.02696	0	0	0	0	0	0
ENST00000420498	ENSG00000224985	AL590714.1	0	0	0.087998	0	0	0	0	0	0
ENST00000648228	ENSG00000230630	DNM3OS	0	0.014591	0.040876	0	0	0.00763	0	0.00763	0
ENST00000433869	ENSG00000230550	ERLNC1	0	0	0.004185	0	0	0.000681	0.001699	0.000681	0
ENST00000425161	ENSG00000237605	AL591846.2	0	0	0.001009	0	0	0.000242	0	0.000242	0
ENST00000621440	ENSG00000276997	AL513314.2	0	0	0.009067	0	0	0	0	0	0
ENST00000433837	ENSG00000233706	AL353689.2	0	0	0.050391	0	0	0	0	0	0
ENST00000423963	ENSG00000237520	AL391832.1	0	0	0.021846	0	0	0	0	0	0
ENST00000442382	ENSG00000230628	AL160408.3	0	0	0.005186	0	0	0	0	0	0
ENST00000443224	ENSG00000224215	AL606469.1	0	0	0.022485	0	0	0	0.001617	0	0.003501
ENST00000471327	ENSG00000239731	RN7SL825P	0	0	0.028714	0	0	0	0	0	0
ENST00000450890	ENSG00000229656	ITGB1-DT	0	0	0.005068	0	0	0	0	0	0
ENST00000601888	ENSG00000228065	LINC01515	0	0	0.010146	0	0	0	0	0	0
ENST00000446730	ENSG00000229990	AC022400.2	0	0	0.021341	0	0	0.007908	0	0.007908	0.004097
ENST00000629474	ENSG00000282772	AL358790.1	0.048698	0	0.190715	0	0.046176	0	0	0	0
ENST00000596000	ENSG00000229981	LINC01435	0	0	0.044665	0	0	0	0	0	0
ENST00000443652	ENSG00000233340	AL139120.1	0	0	0.022439	0	0	0	0	0	0
ENST00000454857	ENSG00000177640	CASC2	0	0	0.019612	0	0	0	0	0	0
ENST00000533693	ENSG00000251364	AC107884.1	0	0	0.014174	0	0	0	0	0	0
ENST00000527726	ENSG00000255462	AC104031.1	0	0	0.049682	0	0	0	0	0	0.019285
ENST00000533767	ENSG00000254453	NAV2-AS2	0	0	0.009388	0	0	0	0	0	0
ENST00000527083	ENSG00000254934	LINC00678	0	0	0.058313	0	0	0	0	0	0
ENST00000532760	ENSG00000255004	AL133330.2	0	0	0.007703	0	0	0	0	0	0
ENST00000534165	ENSG00000255542	AC090625.2	0	0.001141	0.017839	0	0	0	0	0	0
ENST00000613900	ENSG00000274251	AP003419.2	0	0	0.001108	0	0	0	0	0	0
ENST00000364814	ENSG00000201684	RN7SKP239	0	0	0.087396	0	0	0	0	0	0.021249
ENST00000333139	ENSG00000184224	C11orf72	0	0.002624	0.01855	0	0	0	0.00133	0	0.004044
ENST00000531906	ENSG00000254631	AP001372.1	0	0	0.013135	0	0	0	0	0	0
ENST00000533740	ENSG00000254460	AP002815.1	0	0	0.01197	0	0	0	0	0	0
ENST00000523626	ENSG00000246174	KCTD21-AS1	0	0	0.026271	0	0	0	0	0	0
ENST00000528717	ENSG00000255337	AP001830.1	2e-06	0	4e-06	0	0	0	0	0	0
ENST00000652518	ENSG00000286044	AP001977.1	0	0	0.006171	0.002223	0	0.001311	0	0.001311	0
ENST00000533378	ENSG00000254905	AP001318.1	0	0.003765	0.033766	0	0	0	0	0	0.007624
ENST00000578084	ENSG00000254960	KIRREL3-AS2	0	0	0.041633	0	0	0	0	0	0
ENST00000649371	ENSG00000256862	AC005842.1	0.00023	0	0.014669	0	0	0	0	0	0
ENST00000499202	ENSG00000245667	AC006064.1	0.008864	0	0.026576	0	0	0	0.006304	0	0
ENST00000545258	ENSG00000255882	AC091814.1	0	0	0.025705	0	0	0	0	0	0
ENST00000544015	ENSG00000255565	AC073651.1	0	0	0.021445	0	0	0	0	0	0
ENST00000612816	ENSG00000257176	AC009318.1	0	0	0.030637	0	0	0	0	0	0
ENST00000637934	ENSG00000260473	AC068987.3	0	0	0.014604	0	0	0	0	0	0
ENST00000602306	ENSG00000270175	AC023509.3	0.003733	0.028963	0.917594	0.015746	0.025594	0.020475	0.038299	0.020475	0.018086
ENST00000535594	ENSG00000255886	AC020611.2	0	0	0.007804	0	0	0	0	0	0
ENST00000547360	ENSG00000257543	AC063948.1	0	0	0.013807	0	0	0	0	0	0
ENST00000538335	ENSG00000212694	LINC01089	0	0	0.14925	0.02226	0.033608	0	0	0	0
ENST00000422148	ENSG00000223576	AL355001.1	0	0	0.024096	0	0	0.013493	0	0.013493	0
ENST00000620494	ENSG00000275294	LINC02340	0	0	0.028525	0	0	0	0	0	0
ENST00000454681	ENSG00000230490	AL139383.1	0	0.00408	0.007312	0	0	0	0	0	0
ENST00000542632	ENSG00000215483	LINC00598	0	0	0.001046	0	0	0	0	0	0
ENST00000421190	ENSG00000230731	AL589745.1	0	0	0.003344	0	0	0	0	0	0
ENST00000647756	ENSG00000231817	LINC01198	0	0	0.005618	0	0	0.000887	0	0.000887	0
ENST00000437748	ENSG00000223732	AL359706.1	0	0	0.014277	0	0	0	0	0	0
ENST00000433480	ENSG00000231473	RB1-DT	0	0	0.002629	0	0	0	0	0	0
ENST00000596050	ENSG00000236778	INTS6-AS1	0	0	0.005834	0	0	0	0	0	0
ENST00000650541	ENSG00000227674	LINC00355	0	0	0.012934	0.006036	0	0	0	0	0
ENST00000603464	ENSG00000271564	LINC02333	0	0	0.010411	0	0	0	0	0	0
ENST00000568302	ENSG00000261105	LMO7-AS1	0.005859	0	0.074784	0	0	0.005762	0	0.005762	0
ENST00000399886	ENSG00000215256	DHRS4-AS1	0.000331	0	0.013845	0	0	0	0	0	0
ENST00000551395	ENSG00000257126	FOXG1-AS1	0.001483	0.001614	0.019709	0	0	0	0	0	0
ENST00000652126	ENSG00000258526	AL049828.1	0	0	0.00694	0	0	0	0	0	0
ENST00000611904	ENSG00000274704	RF00017	0	0	0.003333	0	0	0	0	0	0
ENST00000623502	ENSG00000214900	LINC01588	0	0	0.014586	0	0	0.003804	0	0.003804	0
ENST00000500036	ENSG00000247287	AL359220.1	0	0	0.006162	0	0	0	0	0	0
ENST00000555512	ENSG00000258819	LINC02289	0	0	0.009463	0	0	0	0	0	0
ENST00000553322	ENSG00000258637	AC008056.1	0	0	0.012087	0	0	0	0	0	0
ENST00000557195	ENSG00000258733	LINC02328	0	0	0.019288	0	0	0	0	0	0.002535
ENST00000555913	ENSG00000259077	AL136501.1	0	0	0.011172	0	0	0	0	0	0
ENST00000557524	ENSG00000258798	AL133153.2	0	0	0.030498	0	0	0	0	0	0.011933
ENST00000555853	ENSG00000258424	AL512791.1	0	0	0.016027	0	0	0	0	0	0
ENST00000556458	ENSG00000258504	AL157871.1	0.000714	0	0.010697	0	0	0.000259	0	0.000259	0.001306
ENST00000517266	ENSG00000253075	RN7SKP92	0.003014	0	0.050117	0	0	0	0	0	0
ENST00000651558	ENSG00000259905	PWRN1	0	0	0.005342	0	0	0	0	0	0
ENST00000501830	ENSG00000247728	AC091057.2	0	0	0.073825	0	0.038102	0	0	0	0
ENST00000612997	ENSG00000274281	AC022929.2	0	0.004182	0.008689	0	0	0	0	0	0
ENST00000366384	ENSG00000203573	RF00017	0	0.006054	0.045584	0	0	0	0	0	0
ENST00000607504	ENSG00000260814	AC073657.1	0.011636	0	0.032002	0	0	0	0	0	0
ENST00000560375	ENSG00000259188	AC025040.1	0	0	0.007197	0	0	0	0	0	0
ENST00000559977	ENSG00000259668	AC066613.1	0	0	5.8e-05	0	0	0	0	0	0
ENST00000500929	ENSG00000245975	AC090515.2	0	0.030306	0.063551	0	0	0	0	0	0
ENST00000559589	ENSG00000259756	AC100839.2	0	0	0.008441	0	0	0	0.004531	0	0
ENST00000560350	ENSG00000259248	USP3-AS1	0	0	0.01049	0	0	0	0	0	0
ENST00000559357	ENSG00000259248	USP3-AS1	0	0	0.027441	0	0	0	0	0	0
ENST00000559914	ENSG00000212766	EWSAT1	0	0	0.03267	0	0	0	0	0	0
ENST00000568391	ENSG00000261632	AC022872.1	0	0	0.01073	0	0	0	0	0	0
ENST00000560057	ENSG00000259322	AC090607.1	0	0	0.020581	0	0	0.00148	0	0.00148	0.002033
ENST00000558082	ENSG00000259518	LINC01583	0	0	0.000361	0	0	0	0	0	0
ENST00000557908	ENSG00000259416	AC021739.3	0	0	0.008015	0	0	0	0	0	0
ENST00000565547	ENSG00000261407	AC013565.3	0	0	0.006901	0	0	0	0	0	0
ENST00000570120	ENSG00000261407	AC013565.3	0	0	0.138636	0	0	0	0	0	0
ENST00000560800	ENSG00000247809	NR2F2-AS1	0	0	0.027864	0	0	0	0	0	0
ENST00000559755	ENSG00000259579	AC087762.1	0	0	0.007891	0	0	0	0	0	0
ENST00000560351	ENSG00000259583	AC015712.2	0	0	0.000555	0	0	0	0	0	0
ENST00000569670	ENSG00000261207	AL031717.1	0	0	0.021028	0	0	0	0	0	0
ENST00000571970	ENSG00000262468	LINC01569	0	0	0.057279	0	0	0	0	0	0
ENST00000564919	ENSG00000259939	AC022167.1	5.6e-05	0.000146	0.003974	0	0	0	0	0	0
ENST00000572017	ENSG00000262151	AC133065.1	0	0	0.008965	0	0	0	0	0	0
ENST00000574681	ENSG00000262703	AC009121.1	0	0	0.006329	0	0	0	0	0	0
ENST00000573856	ENSG00000262171	AC130651.1	0	0	0.01724	0	0	0	0	0	0
ENST00000562280	ENSG00000260034	LCMT1-AS2	0	0	0.003553	0	0	0	0	0	0
ENST00000561471	ENSG00000261552	AC109460.4	0	0	0.021682	0	0	0	0	0	0
ENST00000564901	ENSG00000260083	MIR762HG	0	0	0.039143	0	0	0	0	0	0
ENST00000570073	ENSG00000259810	AC002519.1	0	0	0.006619	0	0	0	0	0	0
ENST00000568931	ENSG00000259833	AC138625.2	0	0	0.013456	0	0	0	0	0	0
ENST00000568362	ENSG00000261838	AC092718.6	0	0	0.009838	0	0	0	0	0	0
ENST00000561808	ENSG00000260213	AC092718.2	0	0	0.0232	0	0.007981	0	0	0	0
ENST00000561599	ENSG00000260228	AC009119.1	0	0.009822	0.040297	0	0	0	0	0	0
ENST00000563280	ENSG00000260944	FOXC2-AS1	0	0	0.030328	0	0	0	0	0	0.014322
ENST00000570286	ENSG00000261697	AC010531.4	0	0	0.008165	0	0	0	0	0	0
ENST00000566898	ENSG00000260528	FAM157C	0	0.001294	0.029174	0.00638	0	0	0	0	0
ENST00000629249	ENSG00000241525	AC141424.1	0	0	0.002433	0	0	0	0	0	0
ENST00000570924	ENSG00000262777	AC032044.1	0	0	0.00754	0	0	0	0	0	0
ENST00000453339	ENSG00000237377	AC005703.2	0	0	0.009872	0	0	0	0	0	0
ENST00000578640	ENSG00000264932	AC115989.1	0	0	0.016414	0	0	0	0	0	0
ENST00000589259	ENSG00000266979	LINC01180	0	0.001375	0.006256	0	0.002142	0	0	0	0
ENST00000572349	ENSG00000261886	AC005670.1	0.001896	0.00243	0.110158	0.000336	0	0	0	0	0.014816
ENST00000581805	ENSG00000265542	AC015845.2	0	0	0.009722	0	0	0	0	0	0
ENST00000589826	ENSG00000267461	AC079210.1	0	0	0.006532	0	0	0	0	0	0
ENST00000543512	ENSG00000228639	ROCR	0	0	0.030135	0	0	0	0	0	0
ENST00000638890	ENSG00000283914	AC087645.4	0	0	0.023335	0	0	0	0	0	0
ENST00000582249	ENSG00000266445	NARF-AS1	0	0	0.022054	0	0	0.004482	0	0.004482	0
ENST00000576836	ENSG00000263098	AC068014.1	0	0	0.009762	0	0	0	0	0	0
ENST00000582008	ENSG00000263753	LINC00667	0.027829	0	0.10146	0	0	0.008488	0	0.008488	0
ENST00000581571	ENSG00000265933	LINC00668	0.008625	0	0.015401	0	0	0	0	0	0
ENST00000609611	ENSG00000273141	AP001269.4	0.169358	0.012214	0.762744	0.010394	0.009598	0.01379	0.005797	0.01379	0.011487
ENST00000581134	ENSG00000263904	AC015563.1	0	0	0.01434	0	0	0	0	0	0
ENST00000592747	ENSG00000266957	AC012254.1	0	0	0.007547	0.00179	0	0	0	0	0
ENST00000587659	ENSG00000266905	AC114684.1	0	0	0.013126	0	0	0	0	0	0
ENST00000580580	ENSG00000266844	AC093330.1	0	0	0.025077	0	0	0	0	0	0
ENST00000592906	ENSG00000267015	AC023090.1	0	0	0.006381	0	0	0	0	0	0
ENST00000588192	ENSG00000267563	AC011471.2	0	0	0.009728	0	0	0	0	0	0
ENST00000596946	ENSG00000267852	AC119396.2	0	0	0.178266	0	0	0	0.037179	0	0.016455
ENST00000635060	ENSG00000282851	BISPR	0	0	0.029608	0	0	0.000154	0	0.000154	0.01539
ENST00000595094	ENSG00000269110	AC010636.2	0	0	0.007446	0	0	0	0	0	0
ENST00000585813	ENSG00000267339	LINC00906	0	0	0.010975	0	0	0	0	0	0.005613
ENST00000592220	ENSG00000267024	AC008747.1	0.003816	0.001213	0.049025	0.000788	0.003927	0.000302	0.003278	0.000302	0.002246
ENST00000589968	ENSG00000267363	AC092296.3	0	0	0.057597	0	0	0	0	0	0
ENST00000650748	ENSG00000267107	PCAT19	0	0	0.013919	0	0	0	0	0	0
ENST00000497296	ENSG00000239868	RN7SL34P	0	0	0.101078	0	0	0	0	0	0
ENST00000597119	ENSG00000269177	L34079.2	0.00559	0	0.025234	0	0.005849	0	5.6e-05	0	0
ENST00000593888	ENSG00000268423	AC093503.1	0	0	0.009085	0	0	0	0	0	0
ENST00000598376	ENSG00000269806	BICRA-AS1	0	0	0.042165	0	0	0	0	0	0
ENST00000597865	ENSG00000268108	AC008687.2	1.2e-05	3e-05	0.007028	0	1.9e-05	0.000106	0	0.000106	0
ENST00000599222	ENSG00000268886	AC022150.1	0	0	0.005494	0	0	0	0	0	0
ENST00000596769	ENSG00000267943	AC010328.1	0	0	0.001138	0	0	0	0	0	0
ENST00000433592	ENSG00000235092	ID2-AS1	0	0.019469	0.039326	0	0.000586	0	0	0	0
ENST00000416463	ENSG00000242282	AC108488.1	0	0	0.066096	0	0	0	0.001256	0	0
ENST00000627219	ENSG00000227028	SLC8A1-AS1	0	0	0.015479	0	0	0	0	0	0
ENST00000596532	ENSG00000227028	SLC8A1-AS1	0	0	0.006574	0	0	0	0	0	0
ENST00000606382	ENSG00000271955	AC007100.1	0	0	0.009506	0	0	0	0	0	0
ENST00000453476	ENSG00000228590	AC007381.1	0	0	0.020663	0	0	0	0	0	0
ENST00000425779	ENSG00000236498	AC107081.2	0	0	0.01314	0	0	0	0.005708	0	0.001737
ENST00000454595	ENSG00000230749	MEIS1-AS2	0	0	0.015769	0	0	0	0	0	0
ENST00000433581	ENSG00000231134	TCF7L1-IT1	0	0	0.085757	0.002772	0.005975	0.004265	0.009683	0.004265	0
ENST00000443030	ENSG00000228488	AC092168.1	0	0	0.086656	0	0	0	0	0	0.012708
ENST00000425879	ENSG00000234177	LINC01114	0	0	0.003797	0	0	0	0	0	0
ENST00000652488	ENSG00000231943	PGM5P4-AS1	0	0	0.010565	0	0	0	0	0	0
ENST00000420161	ENSG00000243179	AC110769.1	0	0	0.034015	0	0	0	0	0	0
ENST00000648779	ENSG00000226856	THORLNC	0	0	0.013055	0	0	0.00538	0	0.00538	0
ENST00000413991	ENSG00000237614	AC073257.2	0	0	0.035471	0	0	0	0	0	0
ENST00000420472	ENSG00000226674	TEX41	0	0.001517	0.012079	0.001378	0	0.000468	0.000835	0.000468	0.001585
ENST00000602006	ENSG00000238057	ZEB2-AS1	0	0	0.008805	0	0	0	0	0	0
ENST00000648698	ENSG00000238057	ZEB2-AS1	0.007091	0	0.015665	0	0	0	0	0	0
ENST00000433174	ENSG00000162947	LINC01931	0	0	0.04986	0	0	0	0	0	0
ENST00000624287	ENSG00000234350	AC007405.1	0	0	0.007778	0	0	0	0	0	0
ENST00000627798	ENSG00000213963	AC019080.1	0	0	0.002417	0	0	0	0	0	0.00076
ENST00000592161	ENSG00000237298	TTN-AS1	0	0	0.015742	0	0	0	0	0	0
ENST00000436557	ENSG00000231646	FSIP2-AS1	0	0	0.009925	0	0	0	0	0	0
ENST00000429929	ENSG00000231646	FSIP2-AS1	0	0	0.00399	0	0	0	0	0	0
ENST00000640078	ENSG00000283839	AC096667.1	0	0.061518	0.185151	0	0	0.000302	0	0.000302	0.010577
ENST00000456653	ENSG00000237877	LINC01473	0	0	0.005066	0	0	0	0	0	0
ENST00000594591	ENSG00000233766	AC098617.1	0	0	0.002526	0	0	0	0	0	0
ENST00000631217	ENSG00000226312	CFLAR-AS1	0	0	0.000386	0	0	0	0	0	0
ENST00000628464	ENSG00000227769	AC072062.1	0	0	0.00691	0	0	0	0	0	0
ENST00000415479	ENSG00000230838	LINC01614	0	0	0.00713	0	0	0	0	0	0
ENST00000474063	ENSG00000231672	DIRC3	0	0	0.008661	0	0	0	0	0	0
ENST00000433324	ENSG00000236432	AC097662.1	0	0	0.016937	0	0	0	0	0	0
ENST00000439072	ENSG00000224516	AC068134.1	0	0	0.016114	0	0	0	0	0	0
ENST00000439798	ENSG00000231682	LINC01891	0	0	0.041336	0	0	0.010594	0	0.010594	0
ENST00000428471	ENSG00000222020	HDAC4-AS1	0	0	0.119065	0	0	0	0	0	0
ENST00000650993	ENSG00000286158	AL034548.2	0	0	0.004456	0	0	0	0	0	0
ENST00000607947	ENSG00000234684	SDCBP2-AS1	0	0.032956	0.135855	0	0	0	0	0	0
ENST00000443753	ENSG00000232712	KIZ-AS1	0.001289	0	0.002479	0	0	0	0	0	0
ENST00000614331	ENSG00000274507	AL121772.2	0	0	0.052375	0	0	0	0.012096	0	0
ENST00000439498	ENSG00000213742	ZNF337-AS1	0	0	0.039051	0	0	0	0	0	0
ENST00000611894	ENSG00000238129	AL121904.1	0	0	0.005485	0	0	0	0	0	0
ENST00000441029	ENSG00000229188	AL050349.1	0	0	0.012943	0	0	0	0	0	0
ENST00000615503	ENSG00000237595	LINC01275	0	0	0.010242	0	0	0	0	0	0
ENST00000411824	ENSG00000232803	SLCO4A1-AS1	0	0	0.001064	0	0	0	0	0	0
ENST00000623436	ENSG00000274333	CU633967.1	0	0	0.71575	0	0	0	0	0	0.003833
ENST00000624444	ENSG00000274333	CU633967.1	0.002468	0.003784	0.269385	0.002014	0.012867	0.014335	0.002909	0.014335	0.003394
ENST00000624633	ENSG00000277991	FP236241.1	0	0	0.029667	0	0	0	0	0	0
ENST00000419952	ENSG00000215386	MIR99AHG	0	0.001912	0.044924	0.000852	0	0	0	0	0
ENST00000619549	ENSG00000227456	LINC00310	0	0	0.057175	0.014484	0	0	0	0	0
ENST00000609953	ENSG00000272825	AL844908.1	0	0	0.014173	0	0	0	0	0	0
ENST00000422876	ENSG00000234884	AL022329.1	0	0	0.00431	0	0	0	0	0	0
ENST00000613780	ENSG00000225783	MIAT	7e-06	4.9e-05	0.000859	1e-06	1.2e-05	3e-05	2.3e-05	3e-05	0.000161
ENST00000417123	ENSG00000232564	MRTFA-AS1	0	0	0.001977	0	0	0	0	0	0
ENST00000651458	ENSG00000224271	AL117329.1	0	0	0.002156	0	0	0	0	0	0
ENST00000650972	ENSG00000224271	AL117329.1	0	0	0.011734	0	0	0	0	0	0
ENST00000420823	ENSG00000224957	LINC01266	0	0	0.002309	0	0	0	0	0	0
ENST00000615017	ENSG00000235831	BHLHE40-AS1	0.005419	0.005148	0.027918	0	0	0	0	0	0
ENST00000414603	ENSG00000189229	AC069277.1	0	0	0.019377	0	0	0	0	0	0
ENST00000435368	ENSG00000231401	AC023481.1	0.002128	0.015916	0.040421	0	0	0	0	0	0
ENST00000608068	ENSG00000272554	AC012087.2	0	0	0.011422	0	0	0	0	0	0
ENST00000626662	ENSG00000203506	RBMS3-AS2	0	0	0.022801	0	0	0	0	0	0
ENST00000603982	ENSG00000271653	AC097359.3	0	0.007712	0.022911	0	0	0	0	0	0
ENST00000626444	ENSG00000232354	VIPR1-AS1	0.003992	0	0.007108	0	0	0	0	0	0
ENST00000435578	ENSG00000244380	AC134772.1	0	0	0.041232	0	0	0	0.020244	0	0
ENST00000607297	ENSG00000272146	ARF4-AS1	1.3e-05	1.1e-05	0.725829	0	0.071669	1e-06	0	1e-06	3e-06
ENST00000472514	ENSG00000240175	MAGI1-AS1	0	0	0.004823	0	0	0	0	0	0
ENST00000641901	ENSG00000240405	SAMMSON	0	0	0.003285	0	0	0	0	0	0
ENST00000478745	ENSG00000244345	AC104435.2	0	0	0.020406	0	0	0	0	0	0
ENST00000494231	ENSG00000240423	LINC00636	0	0	0.007311	0	0	0	0	0	0
ENST00000492981	ENSG00000242659	AC108693.2	0	0	0.011095	0	0	0	0	0	0
ENST00000507924	ENSG00000250012	AC079848.1	0	0	0.016026	0	0	0	0	0	0
ENST00000504737	ENSG00000250592	AC055733.2	0.000618	0	0.027179	0	0	0	0	0	0
ENST00000492725	ENSG00000244124	ATP1B3-AS1	0	0	0.029492	0	0	0	0	0	0
ENST00000471176	ENSG00000242791	AC117395.1	0.020761	0	0.05113	0.007406	0	0	0	0	0
ENST00000472821	ENSG00000243944	AC117386.2	0	0	0.001626	0	0	0	0	0	0
ENST00000471357	ENSG00000243629	LINC00880	0	0	0.009194	0	0	0	0.004102	0	0
ENST00000469196	ENSG00000241544	LINC02029	0.005393	0.010307	0.179584	0	0	0.010836	0.081786	0.010836	0
ENST00000495318	ENSG00000240207	AC080013.1	0	0.002951	0.075978	0	0	0	0.003281	0	0.017038
ENST00000418839	ENSG00000223387	LINC02068	0	0	0.000224	0	0	0	0	0	0
ENST00000415451	ENSG00000223711	AC069213.1	0	0	0.019064	0	0.010506	0	0	0	0
ENST00000630863	ENSG00000242086	MUC20-OT1	0.000868	0	0.003137	0	0	0	0	0	3.8e-05
ENST00000438408	ENSG00000235126	AC128709.2	0	0	0.063986	0.001685	0	0	0	0	0
ENST00000581398	ENSG00000196810	CTBP1-DT	0.052924	0.002113	0.277148	7e-06	0.000369	0.00128	0.044209	0.00128	0.009034
ENST00000651845	ENSG00000180769	WDFY3-AS2	0	0	0.021155	0	0	0	0	0	0
ENST00000501215	ENSG00000247775	SNCA-AS1	0	0	0.010477	0	0	0	0	0	0
ENST00000505408	ENSG00000251523	AC108159.1	0	0	0.012324	0	0	0	0	0	0
ENST00000515026	ENSG00000245322	AC097460.1	0	0	0.018349	0	0	0	0	0	0
ENST00000504009	ENSG00000249509	AC023886.1	0	0	0.017758	0	0	0	0	0	0
ENST00000609359	ENSG00000273247	AC097376.2	0	0.014849	0.08981	0	0.014578	0	0	0	0.010689
ENST00000506895	ENSG00000249084	AC027627.1	0	0	0.001678	0	0	0	0	0	0
ENST00000514297	ENSG00000250626	AC093909.4	0	0	0.009283	0	0	0	0	0	0
ENST00000623673	ENSG00000221990	EXOC3-AS1	0.000309	0.000194	0.035237	0.000529	0.003386	0.007417	0.000216	0.007417	0.00014
ENST00000606994	ENSG00000272086	AC025181.2	0.030878	0.03406	5.38035	0.026965	0.031971	0.01384	0.021034	0.01384	0.018847
ENST00000508123	ENSG00000251141	MRPS30-DT	0	0	0.030178	0	0	0	0	0	0
ENST00000506435	ENSG00000251307	AC026704.1	0	0	0.018782	0	0.009626	0	0	0	0
ENST00000643848	ENSG00000250802	ZBED3-AS1	0	0	0.006768	0	0	0	0	0	0
ENST00000513755	ENSG00000245556	SCAMP1-AS1	0	0	0.110525	0	0	0.014962	0.045382	0.014962	0
ENST00000648636	ENSG00000248323	LUCAT1	0	0	0.007287	0	0	0	0	0	0
ENST00000649969	ENSG00000248323	LUCAT1	0	0	0.003797	0	0	0	0	0	0
ENST00000650261	ENSG00000248323	LUCAT1	0.009969	0	0.076987	0	0	0	0.019182	0	0
ENST00000607856	ENSG00000272021	AC008592.5	0	0	0.012895	0	0	0	0	0	0
ENST00000504833	ENSG00000247877	AC021086.1	0	0	0.010031	0	0	0	0	0	0
ENST00000442823	ENSG00000224032	EPB41L4A-AS1	0	0	0.189107	0.023506	0	0	0	0	0
ENST00000519703	ENSG00000253807	LINC01170	0	0	0.015477	0	0	0	0	0	0
ENST00000504658	ENSG00000249593	AC011405.1	0.00163	0	0.002992	0	0	0	0	0	0
ENST00000414314	ENSG00000231185	SPRY4-AS1	0	0	0.013598	0	0	0	0	0	0
ENST00000523176	ENSG00000253406	AC012613.2	1.2e-05	0	0.004064	0	0	0	0.002047	0	0
ENST00000520658	ENSG00000248544	AC008676.1	0	0	0.072926	0	0	0	0	0	0
ENST00000648969	ENSG00000249738	AC008691.1	0	0	0.001612	0	0	0	0	0	0
ENST00000518837	ENSG00000253947	AC008705.1	0	0	0.046908	0	0	0	0	0	0
ENST00000534468	ENSG00000250903	GMDS-DT	0	0	0.012764	0	0	0	0	0	0
ENST00000427591	ENSG00000237716	AL136309.3	0	0	0.020094	0	0	0	0	0	0
ENST00000437430	ENSG00000231811	AL159166.1	0	0	0.032561	0	0	0	0	0	0
ENST00000602500	ENSG00000270174	AL022097.1	0	0.003435	0.010506	0	0	0	0	0	0
ENST00000423504	ENSG00000224164	AL133264.2	0	0	0.017317	0	0	0	0	0	0
ENST00000454812	ENSG00000234753	FOXP4-AS1	0	0	0.025928	0	0	0.005504	0	0.005504	0
ENST00000588819	ENSG00000226803	ZNF451-AS1	0.01871	0	0.084682	0	0	0.016419	0	0.016419	0
ENST00000602823	ENSG00000269966	AL136164.2	0	0	0.001556	0	0	0	0	0	0
ENST00000457513	ENSG00000271860	AL589740.1	0	0	0.006592	0	0	0	0	0	0
ENST00000425364	ENSG00000231046	AL360227.1	0.001031	0	0.065183	0.016456	0	0	0	0	0
ENST00000442928	ENSG00000231889	TRAF3IP2-AS1	0	0	0.015177	0	0	0	0	0	0
ENST00000439075	ENSG00000236548	RNF217-AS1	0	0.000193	0.010448	0	0	0	0.001021	0	1.5e-05
ENST00000607749	ENSG00000272189	AL024508.2	0	0	0.004879	0	0	0	0	0	0
ENST00000414038	ENSG00000231426	FILNC1	0	0	0.038634	0	0	0	0	0	0
ENST00000417650	ENSG00000232618	AL355304.1	0	0	0.004837	0	0	0	0	0	0
ENST00000461853	ENSG00000243373	RN7SL173P	0	0	0.09072	0	0	0	0	0	0
ENST00000437964	ENSG00000230487	PSMG3-AS1	0	0	0.029672	0	0	0	0	0	0
ENST00000609497	ENSG00000272894	AC004982.2	0	0	0.008707	0	0	0	0	0	0
ENST00000448664	ENSG00000237773	AC073332.1	0	0	0.055678	0	0	0.016306	0.003691	0.016306	0.006001
ENST00000636703	ENSG00000236318	AC019117.2	0	0	0.012095	0.004517	0	0	0	0	0
ENST00000449537	ENSG00000214870	AC004540.1	0	0	0.048598	0	0.012689	0	0	0	0
ENST00000522674	ENSG00000240990	HOXA11-AS	0	0.000346	0.011613	0	0	1e-06	0	1e-06	1.2e-05
ENST00000522193	ENSG00000253552	HOXA-AS2	0	0.036826	0.147455	0.001418	0	0	0	0	0
ENST00000412856	ENSG00000228878	SEPT7-AS1	0	0	0.002234	0	0	0	0	0	0
ENST00000424194	ENSG00000228878	SEPT7-AS1	0	0	0.014518	0	0	0	0	0	0
ENST00000443162	ENSG00000234183	LINC01952	0	0	0.070466	0	0	0	0	0	0
ENST00000450016	ENSG00000234183	LINC01952	0.019283	0	0.057532	0	0	0.016174	0	0.016174	0
ENST00000376482	ENSG00000235077	AC073842.1	0.040542	0	0.076973	0	0	0	0	0	0
ENST00000392674	ENSG00000213167	RF00017	0	0	0.032885	0	0	0	0	0	0
ENST00000650435	ENSG00000231210	LINC01510	0.001052	0	0.010996	0.000407	0	0	0	0	0
ENST00000420664	ENSG00000228368	AC106873.1	0	0	0.013632	0	0	0	0	0	0
ENST00000519814	ENSG00000253505	AC103957.1	0	0	0.01663	0	0.008264	0	0	0	0
ENST00000649472	ENSG00000248538	AC022784.1	0	0	0.015039	0	0	0	0	0	0
ENST00000522640	ENSG00000253112	AC102945.1	0	0	0.013683	0	0	0	0	0	0
ENST00000521470	ENSG00000253408	AC083973.1	0	0	0.023928	0	0.012302	0	0	0	0
ENST00000519144	ENSG00000246430	LINC00968	0	0	0.009308	0	0	0	0	0	0
ENST00000494712	ENSG00000241997	RN7SL323P	0	0	0.019004	0	0	0	0	0	0
ENST00000520930	ENSG00000253190	AC084082.1	0	0	0.115419	0.025705	0	0	0	0	0.006587
ENST00000457356	ENSG00000235531	MSC-AS1	0.010418	0.007437	0.059756	0	0	0	0	0	0.009741
ENST00000517664	ENSG00000253636	AC022893.1	0	0	0.039039	0	0	0	0	0	0
ENST00000524085	ENSG00000253859	AC018616.1	0	0	0.006031	0	0	0	0	0	0
ENST00000521433	ENSG00000253553	AC090578.1	0	0	0.019017	0	0	0	0	0	0
ENST00000523859	ENSG00000251136	AF117829.1	0	0.030762	0.31487	0.029241	0	0.002858	0.022386	0.002858	0
ENST00000522980	ENSG00000253576	AF181450.1	0.000192	0	0.000413	0	0	0	0	0	0
ENST00000518591	ENSG00000253582	AC090579.1	0.006602	0	0.04906	0	0.005075	0	0	0	0.00312
ENST00000415088	ENSG00000227170	AF178030.1	0	0	0.008126	0	0	0	0	0	0
ENST00000524355	ENSG00000253286	AC090193.1	0	0	0.015658	0	0	0	0	0	0
ENST00000411561	ENSG00000233367	AL133480.1	0	0	0.012792	0	0	0.006433	0	0.006433	0
ENST00000443688	ENSG00000225489	AL354707.1	0	0	0.010355	0	0	0	0	0	0
ENST00000642165	ENSG00000228714	AL691420.1	0	0	0.008439	0	0	0	0	0	0.002359
ENST00000415141	ENSG00000227218	AL157935.1	0	0	0.008476	0	0	2.4e-05	0	2.4e-05	0
ENST00000650882	ENSG00000227619	AL391056.1	0	0	0.023651	0	0.008501	0.002413	0	0.002413	0
ENST00000587264	ENSG00000236986	AL157938.2	0	0	0.008131	0	0	0	0	0	0
ENST00000455039	ENSG00000225361	PPP1R26-AS1	1.5e-05	4.2e-05	0.008488	0	5e-06	6.9e-05	6e-06	6.9e-05	1e-06
ENST00000422438	ENSG00000238178	AC078993.1	0	0	0.045948	0	0	0	0	0	0
ENST00000454712	ENSG00000238178	AC078993.1	0	0	0.001357	0	0	0	0	0	0
ENST00000424026	ENSG00000225037	EIF1AX-AS1	0	0	0.023469	0	0	0	0	0	0
ENST00000451979	ENSG00000233661	SPIN4-AS1	0	0	0.045963	0.023452	0	0	0	0	0
ENST00000603672	ENSG00000230590	FTX	0	0	0.004701	0	0	0	0	0	0
ENST00000602576	ENSG00000230590	FTX	0	0	0.000741	0	0	0	0	0	0
ENST00000566241	ENSG00000261212	AC234778.2	0	0	0.026104	0	0	0	0	0	0
ENST00000438401	ENSG00000228338	LINC01784	0	0	0.035169	0	0	0	0	0	0
ENST00000417651	ENSG00000230523	LINC01756	0	0	0.008604	0	0	0	0	0	0
ENST00000422374	ENSG00000234810	AL603840.1	0	0	0.002274	0	0	0	0.000461	0	0
ENST00000439394	ENSG00000226172	AL139420.1	0	0.014289	0.028303	0	0	0	0	0	0
ENST00000444721	ENSG00000234601	CHRM3-AS1	0	0	0.019014	0	0	0	0.009642	0	0
ENST00000566763	ENSG00000261671	AL158211.1	0	0	0.024222	0	0	0	0	0	0
ENST00000439913	ENSG00000234864	LINC02632	0	0	0.004661	0	0	0	0	0	0
ENST00000649504	ENSG00000285810	AC018511.5	0	0	0.011862	0	0	0	0	0	0
ENST00000450054	ENSG00000237761	AL161646.1	0	0	0.019162	0	0	0	0	0	0
ENST00000605240	ENSG00000270972	AC136475.9	0	0	0.009297	0	0	0.004228	0	0.004228	0
ENST00000534128	ENSG00000255447	AC044839.5	0	0	0.019678	0	0	0	0	0	0
ENST00000399003	ENSG00000214797	AP002358.1	0	0.003327	0.006578	0	0	0	0	0	0
ENST00000524942	ENSG00000255553	AP003733.3	0	0	0.01835	0	0	0	0	0	0
ENST00000615020	ENSG00000203334	AP003027.1	0.000215	0	0.004443	0	0	0	0	0	0
ENST00000537491	ENSG00000257067	AP000797.3	0	0	0.018627	0	0	0	0	0	0
ENST00000541404	ENSG00000256582	LINC02390	0	0	0.016501	0	0	0	0	0	0
ENST00000540399	ENSG00000256994	LINC02378	0	0.008962	0.017655	0	0	0	0	0	0
ENST00000648410	ENSG00000257906	LINC02156	0	0	0.00592	0	0	0	0	0	0
ENST00000552413	ENSG00000257603	AC010183.1	0	0	0.012783	0	0	0	0	0	0
ENST00000431171	ENSG00000229609	LINC01079	0	0	0.046672	0	0	0	0	0	0
ENST00000426509	ENSG00000237585	LINC00407	0	0	0.043317	0	0	0	0	0	0
ENST00000427717	ENSG00000229557	LINC00379	0	0	0.02144	0	0	0	0	0	0
ENST00000437113	ENSG00000234168	LINC01039	0	0	0.013601	0	0	0	0	0	0
ENST00000439008	ENSG00000229792	LINC00399	0	0	0.015795	0	0	0	0	0	0
ENST00000555115	ENSG00000258854	AL358333.1	0	0	0.004719	0	0	0	0	0	0
ENST00000556120	ENSG00000258498	DIO3OS	0	0	0.003737	0	0	0	0	0	0
ENST00000556528	ENSG00000258913	AL590079.1	0	0	0.014693	0	0	0	0	0	0
ENST00000559246	ENSG00000259336	AC021231.1	0	0	0.004412	0	0	0	0	0	0
ENST00000616620	ENSG00000275636	AC021755.3	0	0	0.010763	0	0	0	0	0	0.000833
ENST00000616350	ENSG00000273925	AC084757.4	0	0	0.008784	0	0	0	0	0	0
ENST00000610332	ENSG00000275175	AC106028.5	0	0	0.000624	0	0	0	0	0	0
ENST00000560586	ENSG00000259534	AC087477.4	0	0	0.021028	0	0	0	0.007758	0	0
ENST00000456235	ENSG00000236819	LINC01563	0	0	0.024642	0	0	0	0	0	0.009016
ENST00000585536	ENSG00000267035	AC015911.2	0	0	0.008835	0	0	0	0	0	0
ENST00000616810	ENSG00000276508	AC243830.3	0	0	0.049153	0	0	0	0	0	0
ENST00000588060	ENSG00000267151	MIR2117HG	0	0	0.013798	0	0	0	0	0	0
ENST00000611949	ENSG00000263278	AC233701.1	0	0	0.000518	0	0	0	0	0	0
ENST00000575647	ENSG00000262873	AC127496.5	0	0	0.012448	0	0	0	0	0	0
ENST00000578741	ENSG00000264825	AC091588.2	0	0	0.01363	0	0	0	0	0	0
ENST00000583122	ENSG00000264695	AC007922.1	0	0	0.024809	0	0	0.012173	0	0.012173	0
ENST00000587777	ENSG00000266928	AC020905.1	0	0	0.012285	0	0	0	0	0	0
ENST00000428426	ENSG00000232680	AC002511.1	0	0	0.005619	0	0	0	0	0	0
ENST00000641932	ENSG00000237992	LINC01808	0	0	0.004594	0	0	0	0	0	0
ENST00000451749	ENSG00000226708	AC073409.1	0	0	0.034352	0	0	0	0	0	0.000316
ENST00000410746	ENSG00000222678	RN7SKP213	0	0	0.00093	0	0	0	0	0	0
ENST00000651076	ENSG00000286272	AC093843.2	0	0	0.01273	0	0	0	0	0	0
ENST00000610112	ENSG00000235166	LINC01440	0	0	0.021683	0	0	0	0	0	0
ENST00000622414	ENSG00000233017	AL121832.1	0	0	0.04841	0	0	0	0	0	0
ENST00000464862	ENSG00000240647	RN7SL305P	0	0	0.044395	0	0	0	0	0	0
ENST00000473299	ENSG00000243620	AC092957.1	0	0	0.009006	0	0	0	0	0	0
ENST00000511279	ENSG00000251517	AC096734.1	0	0	0.005496	0	0	0	0	0	0
ENST00000508484	ENSG00000250456	LINC02260	0	0	0.00417	0	0	0	0	0	0
ENST00000511951	ENSG00000250195	AC109927.1	0	0	0.030584	0	0	0	0	0	0
ENST00000506984	ENSG00000249945	AC131094.1	0	0	0.045736	0	0	0	0	0	0.014589
ENST00000605270	ENSG00000271538	LINC02427	0	0	0.004567	0	0	0	0	0	0
ENST00000564741	ENSG00000261037	AC010266.2	0	0	0.005678	0	0	0	0	0	0
ENST00000511758	ENSG00000251168	AC025174.1	0	0	0.037416	0	0	0	0	0	0.019728
ENST00000523446	ENSG00000254106	LINC01848	0	0	0.017114	0	0	0	0	0	0
ENST00000507558	ENSG00000248445	SEMA6A-AS1	0	0	0.020912	0	0	0	0	0	0
ENST00000604680	ENSG00000270697	AC106791.2	0	0	0.00969	0	0	0	0	0	0
ENST00000619068	ENSG00000276778	LINC02227	0	0	0.001142	0	0	0	0	0	0
ENST00000522731	ENSG00000254211	LINC01485	0	0	0.01505	0	0	0	0	0	0
ENST00000545177	ENSG00000230438	SERPINB9P1	0	0.006786	0.020162	0	0	0.005394	0	0.005394	0
ENST00000420572	ENSG00000233358	AL035401.1	0	0	0.006351	0	0	0	0	0	0
ENST00000606298	ENSG00000271967	AL583856.2	0	0	0.030179	0	0	0	0	0	0
ENST00000564198	ENSG00000261003	AL008628.1	0.001519	0	0.003563	0	0	0	0	0	0
ENST00000609858	ENSG00000272745	AC004948.1	0	0	0.001513	0	0	0	0	0	0
ENST00000524012	ENSG00000253745	AC091163.1	0	0	0.007547	0	0	0	0	0	0
ENST00000585082	ENSG00000264615	RN7SL592P	0	0	0.012277	0	0	0	0	0	0
ENST00000612217	ENSG00000276759	AL353753.1	0	0	0.007791	0	0	0	0	0	0
ENST00000651012	ENSG00000286000	AC234775.4	0.002842	0.006687	0.024638	0	0	0.003996	0	0.003996	0
TCONS_00021447	ENSG00000116151	MORN1	0.004466	0.020353	0.093503	0	0	0	0	0	0
TCONS_00002246	ENSG00000171621	SPSB1	0.243233	0.175301	2.44773	0.220958	0.186234	0.071244	0.189008	0.071244	0.144951
TCONS_00022334	ENSG00000028137	TNFRSF1B	0	0	0.098701	0	0	0	0	0	0
TCONS_00003468	ENSG00000158825	CDA	0.009463	0	1.26878	0.001858	0	0.004794	0	0.004794	0
TCONS_00024038	ENSG00000090020	SLC9A1	0	0	0.375581	0.04636	0	0.039231	0	0.039231	0
TCONS_00004442	ENSG00000158195	WASF2	0	0	0.098113	0	0	0	0	0	0
TCONS_00025358	XLOC_010198	XLOC_010198	0	0	0.082507	0	0	0	0	0	0
TCONS_00027936	ENSG00000057468	MSH4	0	0	0.09224	0	0	0.01125	0	0.01125	0
TCONS_00008774	ENSG00000057468	MSH4	0	0	0.031882	0	0.008981	0	0	0	0
TCONS_00008936	XLOC_003610	XLOC_003610	0	0	0.066781	0	0.032766	0	0	0	0
TCONS_00009216	XLOC_003742	XLOC_003742	0	0.039515	0.072069	0	0	0	0	0	0
TCONS_00028863	ENSG00000137936	BCAR3	0.095918	0.005753	0.499414	0	0.022663	0.030371	0.025675	0.030371	0.058843
TCONS_00029295	ENSG00000117543	DPH5	0.008282	0.000707	0.298973	0.000734	0	0.000926	0.004134	0.000926	0.009147
TCONS_00030424	ENSG00000163393	SLC22A15	0.01086	0	0.116972	0	0	0	0	0	0
TCONS_00012033	XLOC_004980	XLOC_004980	0	0	0.077566	0.018329	0	0	0	0	0
TCONS_00012031	XLOC_004980	XLOC_004980	0	0	0.087133	0	0.000439	0	0	0	0.000282
TCONS_00013316	ENSG00000198837	DENND4B	0.003954	0	0.15806	0	0	0	0	0	0
TCONS_00014538	ENSG00000158864	NDUFS2	0.017504	0	0.105009	0	0	0.010863	0	0.010863	0
TCONS_00017847	ENSG00000054392	HHAT	0	0	0.109685	0	0	0	0	0	0
TCONS_00018359	XLOC_007460	XLOC_007460	0	0.011983	0.078505	0	0	0	0	0	0
TCONS_00018361	XLOC_007462	XLOC_007462	0	0.004166	0.082507	0	0	0	0	0	0
TCONS_00019534	ENSG00000162946	DISC1	0	0	0.104162	0	0	0	0	0	0.006224
TCONS_00038613	ENSG00000182901	RGS7	0.017163	0	0.08238	0	0	0	0	0	0
TCONS_00048828	XLOC_020499	XLOC_020499	0	0	0.261469	0	0	0	0	0	0
TCONS_00045471	ENSG00000148834	GSTO1	0	0	0.199065	0	0	0.005088	0	0.005088	0
TCONS_00054117	ENSG00000203805	PLPP4	0	0.000714	0.187254	0	0	0	0	0	0
TCONS_00054222	ENSG00000166033	HTRA1	0	0	0.054538	0	0	0.020376	0	0.020376	0
TCONS_00055439	XLOC_023418	XLOC_023418	0	0	0.109746	0	0	0	0	0	0
TCONS_00058230	ENSG00000019485	PRDM11	0	0	0.131676	0.030726	0	0	0	0	0
TCONS_00061044	XLOC_025450	XLOC_025450	0	0.045296	0.111548	0	0	0	0	0	0.017488
TCONS_00073268	ENSG00000162105	SHANK2	0.003202	0	0.219548	0	0	0	0	0	0.011581
TCONS_00062095	XLOC_025762	XLOC_025762	0	0	0.079016	0	0	0	0	0	0.001253
TCONS_00063067	ENSG00000149201	CCDC81	0	0	0.090154	0	0	0	0.00311	0	0
TCONS_00074915	XLOC_030513	XLOC_030513	0.020007	0	0.128792	0	0	0.014042	0.011212	0.014042	0.027921
TCONS_00063203	XLOC_026166	XLOC_026166	0	0	0.010342	0	0	0	0	0	0
TCONS_00063204	XLOC_026166	XLOC_026166	0	0	0.027728	0	0	0	0	0	0
TCONS_00063210	XLOC_026166	XLOC_026166	0	0	0.697668	0	0	0	0	0	0
TCONS_00075582	ENSG00000149972	CNTN5	0	0	0.095661	0	0	0	0	0	0
TCONS_00076100	ENSG00000166323	C11orf65	0	0	0.118889	0	0	0	0	0	0
TCONS_00064553	ENSG00000149292	TTC12	0	0	0.025584	0	0	0	0	0	0
TCONS_00065069	ENSG00000196655	TRAPPC4	0	0	0.264739	0	0	0.008085	0	0.008085	0
TCONS_00077646	XLOC_031683	XLOC_031683	0	0	0.082068	0	0	0.023164	0	0.023164	0
TCONS_00094586	XLOC_037805	XLOC_037805	0	0	0.126573	0.031072	0	0.000167	0.025607	0.000167	0
TCONS_00095527	XLOC_038265	XLOC_038265	0	0	0.052146	0	0	0	0	0	0
TCONS_00096852	ENSG00000179088	C12orf42	0	0	0.032912	0	0	0	0	0	0
TCONS_00087302	ENSG00000135090	TAOK3	0	0	0.086904	0	0	0	0	0	0
TCONS_00100440	XLOC_040273	XLOC_040273	0	0	0.048965	0	0.016842	0	0	0	0
TCONS_00101531	ENSG00000136169	SETDB2	0.011515	0	0.166281	0	0	0.006121	0	0.006121	0.002507
TCONS_00101539	ENSG00000136147	PHF11	0.002591	0.044676	0.331338	0	0	0	0.004274	0	0.001263
TCONS_00102018	XLOC_040985	XLOC_040985	2.2e-05	0	0.096309	0	0	0	0	0	0
TCONS_00102500	ENSG00000283208	AC001226.2	0.003987	0.002154	0.054344	0.001159	0.00677	0	0.001691	0	0.002726
TCONS_00107465	ENSG00000125245	GPR18	0.001104	0	0.080746	0.011291	0	0	0	0	0.004127
TCONS_00103619	XLOC_041880	XLOC_041880	0	0	0.090287	0	0	0.01381	0	0.01381	0
TCONS_00117162	XLOC_047628	XLOC_047628	0	0	0.091493	0	0	0	0	0	0
TCONS_00122549	ENSG00000169926	KLF13	0	0	0.15394	0	0.008726	0	0.006569	0	0
TCONS_00122767	XLOC_050069	XLOC_050069	0	0	0.069414	0	0	0	0	0	0
TCONS_00129778	XLOC_052675	XLOC_052675	0.006889	0	0.140023	0	0	0.038347	0	0.038347	0
TCONS_00123593	ENSG00000067369	TP53BP1	0	0	0.084778	0	0	0	0	0	0
TCONS_00130340	ENSG00000137860	SLC28A2	0.0085	0	0.148778	0	0	0	0	0	0
TCONS_00131978	ENSG00000157890	MEGF11	0	0	0.118213	0	0	0	0.06672	0	0
TCONS_00126315	ENSG00000169758	TMEM266	0.028326	0	0.09068	0	0	0	0	0	0
TCONS_00134142	XLOC_054116	XLOC_054116	0	0	0.026059	0	0	0	0	0	0.003325
TCONS_00135918	ENSG00000140986	RPL3L	0.008246	0	0.344388	0	0.007142	0.051548	0.090797	0.051548	0.020855
TCONS_00137435	ENSG00000224712	NPIPA3	0.000679	0	0.121321	0	0	0.000624	0	0.000624	0
TCONS_00150264	ENSG00000168807	SNTB2	0	0	0.347346	0	0	0	0	0	0
TCONS_00142179	ENSG00000157350	ST3GAL2	0	0	0.076784	0	0	0.009839	0	0.009839	0
TCONS_00142739	ENSG00000186153	WWOX	0	0.0155	0.092597	0.007336	0.005146	0	0.008524	0	0
TCONS_00143056	XLOC_056816	XLOC_056816	0	0	0.050943	0	0	0	0	0	0
TCONS_00143041	ENSG00000135686	KLHL36	0.001081	0	0.154888	0	0.011863	0.008334	0	0.008334	0.029192
TCONS_00143243	XLOC_056894	XLOC_056894	0.000183	0.011067	0.19906	0.016195	0.008044	0.011167	0.015518	0.011167	0.045523
TCONS_00152000	ENSG00000179588	ZFPM1	0.011671	0	0.099009	0	0	0	0	0	0
TCONS_00156547	ENSG00000278599	TBC1D3E	0	0	0.185838	0	0	0	0	0	0
TCONS_00169360	XLOC_064892	XLOC_064892	0	0	0.085961	0.009764	0	0	0	0	0
TCONS_00159159	ENSG00000154945	ANKRD40	0	0	0.012719	0	0	0	0	0	0
TCONS_00159607	ENSG00000167419	LPO	0	0.048399	0.165509	0	0	0	0	0	0
TCONS_00161352	XLOC_062554	XLOC_062554	0	0	0.025248	0	0	0	0	0	0
TCONS_00161952	XLOC_062729	XLOC_062729	0	0	0.077654	0	0	0	0	0	0
TCONS_00162192	ENSG00000141564	RPTOR	0	0	0.10853	0	0.002088	0.009876	0.00873	0.009876	0
TCONS_00162735	ENSG00000141568	FOXK2	0	0	0.162969	0	0	0	0	0	0
TCONS_00178462	XLOC_068306	XLOC_068306	0	0	0.088288	0	0	0	0	0	0
TCONS_00178458	ENSG00000154864	PIEZO2	0.006463	0.002435	0.179145	0.004307	0.002405	0.006838	0.001807	0.006838	0.002289
TCONS_00192336	ENSG00000131848	ZSCAN5A	0	0	0.077617	0	0.040231	0	0	0	0
TCONS_00203504	ENSG00000171649	ZIK1	0	0	0.098836	0	0	0.01869	0	0.01869	0.020884
TCONS_00219785	ENSG00000134326	CMPK2	0	0	0.018075	0	0	0	0	0	0.00424
TCONS_00204888	XLOC_076748	XLOC_076748	0	0	0.19014	0	0	0	0	0	0
TCONS_00220985	ENSG00000138028	CGREF1	0	0	0.041296	0	0	0	0	0	0
TCONS_00221290	XLOC_083551	XLOC_083551	0	0.017662	0.068018	0	0	0	0	0	0
TCONS_00221555	ENSG00000171055	FEZ2	0	0.002169	0.06895	0	0.001944	0.000816	0	0.000816	0
TCONS_00222064	ENSG00000138036	DYNC2LI1	0	0	0.080355	0.0388	0	0	0	0	0
TCONS_00222516	XLOC_084100	XLOC_084100	0.013667	0	0.108291	0.013981	0.012292	0	0	0	0.011059
TCONS_00224289	XLOC_084705	XLOC_084705	0	0	0.105589	0	0.01945	0	0	0	0
TCONS_00209955	XLOC_078868	XLOC_078868	0	0	0.085563	0	0	0	0	0	0
TCONS_00228482	XLOC_086680	XLOC_086680	0.010594	0.00101	0.074799	0	0	0.006001	0	0.006001	0.002508
TCONS_00229920	XLOC_087329	XLOC_087329	0	0	0.103442	0	0	0	0	0	0
TCONS_00231845	ENSG00000163596	ICA1L	0.006024	0.020862	0.117207	0.016084	0	0	0.015862	0	0
TCONS_00232049	ENSG00000138400	MDH1B	0.001734	0	0.018621	0	0	0	0	0	0
TCONS_00216482	ENSG00000021826	CPS1	0	0	0.178473	0	0	0	0.05031	0	0
TCONS_00233023	XLOC_088606	XLOC_088606	0	0	0.120991	0	0	0	0	0	0
TCONS_00217693	ENSG00000144468	RHBDD1	0	0	0.043759	0	0	0	0	0	0
TCONS_00235586	ENSG00000132669	RIN2	0	0	0.608541	0.294414	0	0.005709	0	0.005709	0.004159
TCONS_00240675	XLOC_091903	XLOC_091903	0	0.043721	0.087177	0	0	0	0	0	0
TCONS_00237941	ENSG00000197818	SLC9A8	0.041853	0	0.584257	0	0.151799	0.002622	0	0.002622	0.104148
TCONS_00248452	XLOC_095450	XLOC_095450	0	0	0.112236	0	0	0.038983	0	0.038983	0
TCONS_00246294	ENSG00000160194	NDUFV3	0.003947	0.001582	0.019604	0.000887	0.001758	0	0	0	0
TCONS_00249204	XLOC_095746	XLOC_095746	0	0	0.083465	0	0	0	0	0	0
TCONS_00247037	XLOC_094711	XLOC_094711	0	0	0.105703	0	0	0	0	0	0
TCONS_00251301	ENSG00000128294	TPST2	0	0	0.091247	0	0.007121	0	0	0	0.003234
TCONS_00252189	XLOC_096874	XLOC_096874	0	0	0.046682	0	0	0	0	0	0
TCONS_00252197	XLOC_096874	XLOC_096874	0	0.011242	0.032807	0	0	0	0	0	0
TCONS_00257614	ENSG00000100271	TTLL1	0	0	0.143947	0	0	0	0	0	0
TCONS_00258435	ENSG00000175928	LRRN1	0	0	0.06863	0.042027	0	0	0	0	0
TCONS_00270911	ENSG00000144455	SUMF1	0.088487	0	0.33035	0	0	0	0	0	0
TCONS_00259136	ENSG00000196639	HRH1	0	0	0.106733	0.006606	0.018598	0	0	0	0
TCONS_00271898	XLOC_104382	XLOC_104382	0	0	0.080437	0.035147	0	0	0	0	0
TCONS_00263559	ENSG00000187098	MITF	0.015317	0.018368	0.118259	0.007046	0	0.008512	0	0.008512	0
TCONS_00263698	XLOC_100861	XLOC_100861	0	0	0.12467	0	0	0	0	0	0
TCONS_00276074	XLOC_105772	XLOC_105772	0.003468	0	0.120225	0	0	0	0.002881	0	0
TCONS_00263793	XLOC_100911	XLOC_100911	0	0	0.176004	0	0	0	0	0	0
TCONS_00264089	XLOC_101116	XLOC_101116	0.014427	0.004668	0.063339	0.017895	0	0	0	0	0
TCONS_00264775	XLOC_101486	XLOC_101486	0	0	0.074323	0	0	0	0	0	0
TCONS_00277823	ENSG00000181722	ZBTB20	0.016452	0	0.055869	0	0	0	0	0	0.016369
TCONS_00277893	XLOC_106849	XLOC_106849	0	0	0.060713	0	0	0	0.00606	0	0.015743
TCONS_00278735	ENSG00000132394	EEFSEC	0	0	0.128406	0	0	0	0	0	0
TCONS_00267182	ENSG00000120756	PLS1	0	0.022908	0.176227	0.003983	0.011976	0.032756	0.006136	0.032756	0
TCONS_00280226	XLOC_107784	XLOC_107784	0	0	0.043405	0	0	0	0	0	0
TCONS_00268428	XLOC_103083	XLOC_103083	0	0	0.058406	0	0	0	0	0	0
TCONS_00280863	ENSG00000169255	B3GALNT1	0	0	0.023802	0	0	0.01025	0	0.01025	0
TCONS_00282607	XLOC_108789	XLOC_108789	0.007322	0	0.146841	0	0	0.002338	0.012408	0.002338	0
TCONS_00284848	ENSG00000118579	MED28	0	0	0.26354	0	0	0	0	0	0
TCONS_00293522	XLOC_113805	XLOC_113805	0	0	0.036363	0.004858	0.010923	0	0	0	0
TCONS_00285325	XLOC_109880	XLOC_109880	0	0	0.09468	0.014522	0.005096	0	0	0	0.018639
TCONS_00286041	XLOC_110213	XLOC_110213	0	0	0.099721	0	0	0	0	0	0
TCONS_00287243	ENSG00000138759	FRAS1	0.000974	0	0.170735	0	0	0	0	0	0
TCONS_00287934	ENSG00000163104	SMARCAD1	0	0	0.250867	0	0	0.073402	0	0.073402	0.038181
TCONS_00298016	XLOC_115823	XLOC_115823	0	0	0.009394	0	0	0	0	0	0
TCONS_00289589	ENSG00000085871	MGST2	0	5.1e-05	0.110296	0	0	0	0.020702	0	0
TCONS_00289670	XLOC_111880	XLOC_111880	0	0.00518	0.041179	0	0	0.00396	0	0.00396	0
TCONS_00298880	XLOC_116223	XLOC_116223	0	0	0.137427	0	0	0	0	0	0
TCONS_00299433	ENSG00000145416	2022-03-01	0	0	0.109908	0.006929	0	0	0	0	0.002221
TCONS_00299438	ENSG00000145416	2022-03-01	0	0	0.005831	0	0	0.002499	0.000619	0.002499	0
TCONS_00299885	ENSG00000150627	WDR17	0	0	0.201229	0	0	0	0	0	0
TCONS_00291683	ENSG00000164344	KLKB1	0.000846	0	0.144417	0	0	0	0	0	0
TCONS_00300751	XLOC_117133	XLOC_117133	0	0	0.068505	0	0	0	0.018004	0	0
TCONS_00301286	XLOC_117435	XLOC_117435	0	0.023381	0.193378	0	0	0.002892	0	0.002892	0
TCONS_00301287	XLOC_117435	XLOC_117435	0	0	0.005108	0	0	0	0	0	0
TCONS_00312282	ENSG00000038382	TRIO	0	0	0.563936	0	0	0.003687	0	0.003687	0
TCONS_00314397	XLOC_123592	XLOC_123592	0	0	0.068334	0	0	0.000187	0	0.000187	0.007876
TCONS_00314624	ENSG00000130449	ZSWIM6	0	0	0.085809	0	0	0	0	0	0.019798
TCONS_00314836	XLOC_123805	XLOC_123805	0	0.001164	0.093542	0.042078	0.008105	0	0	0	0
TCONS_00315570	ENSG00000164253	WDR41	0	0	0.082877	0	0	0	0.028158	0	0
TCONS_00317220	ENSG00000186952	TMEM232	0	0	0.057511	0	0	0	0.002315	0	0
TCONS_00317866	XLOC_125428	XLOC_125428	0	0	0.084778	0	0	0	0	0	0
TCONS_00319055	ENSG00000120725	SIL1	0	0.009886	0.071133	0	0	0.002877	0	0.002877	0.000484
TCONS_00308439	ENSG00000131504	DIAPH1	0	0	0.123504	0	0.031656	0	0	0	0
TCONS_00321281	XLOC_126940	XLOC_126940	0.026578	0	0.099536	0	0	0	0	0	0.020053
TCONS_00321976	ENSG00000161021	MAML1	0	0	0.748488	0.181531	0.001639	0	0	0	0
TCONS_00322769	ENSG00000124785	NRN1	0	0.020982	0.137512	0	0.027363	0.028412	0	0.028412	0
TCONS_00338021	XLOC_134786	XLOC_134786	0	0.018985	0.092326	0.009808	0	0	0.015589	0	0.011435
TCONS_00329793	ENSG00000155111	CDK19	0	0	0.040644	0	0	0	0	0	0
TCONS_00342304	XLOC_136999	XLOC_136999	0	0	0.20175	0	0	0	0	0	2e-06
TCONS_00346234	XLOC_138651	XLOC_138651	0	0.026993	0.106625	0	0	0	0	0	0
TCONS_00356846	ENSG00000158683	PKD1L1	0.00308	0	0.065959	0	0	0	0	0	0.028069
TCONS_00347241	XLOC_139197	XLOC_139197	0	0	0.173536	0	0	0	0	0	0
TCONS_00347932	ENSG00000071462	BUD23	0.053406	0	0.109097	0	0	0	0	0	0
TCONS_00358518	ENSG00000187391	MAGI2	0	0	0.162605	0	0	0	0	0	0
TCONS_00349273	ENSG00000127928	GNGT1	0	0	0.710672	0	0	0	0	0	0
TCONS_00350339	XLOC_140344	XLOC_140344	0	0	0.078645	0	0	0	0	0	0
TCONS_00360939	ENSG00000128512	DOCK4	0	0	0.140906	0	0.018173	0	0	0	0
TCONS_00351850	XLOC_140889	XLOC_140889	0	0	0.112454	0	0	0.016247	0.004463	0.016247	0.012771
TCONS_00362178	ENSG00000157680	DGKI	0	0	0.0987	0	0	0.047334	0	0.047334	0.000978
TCONS_00352346	ENSG00000059377	TBXAS1	0.027419	0.016246	0.110195	0	0	0	0	0	0
TCONS_00363181	ENSG00000187260	WDR86	0	0	0.157432	0	0	0	0	0	0
TCONS_00364223	ENSG00000175806	MSRA	0	0	0.171038	0.003507	0	0	0.022814	0	0
TCONS_00372516	ENSG00000164741	DLC1	0.000859	0.002822	0.401825	0.006244	0.004096	0.013088	0.007132	0.013088	0
TCONS_00372555	XLOC_149784	XLOC_149784	0	0	0.110244	0	0.005652	0	0	0	0.040052
TCONS_00372626	ENSG00000003987	MTMR7	0	0.021967	0.080789	0	0	0	0	0	0
TCONS_00365352	ENSG00000104228	TRIM35	0.576353	0	1.18722	0	0	0	0	0	0
TCONS_00373477	ENSG00000197892	KIF13B	0.015293	0	0.137595	0.013876	0	0	0	0	0
TCONS_00375302	XLOC_151043	XLOC_151043	0	0	0.016801	0	0	0	0	0	0
TCONS_00367384	XLOC_147363	XLOC_147363	0	0	0.138802	0	0	0	0	0	0
TCONS_00379042	ENSG00000147697	GSDMC	0	0	0.07932	0	0	0	0	0	0
TCONS_00379716	XLOC_153168	XLOC_153168	0	0	0.08028	0	0	0	0	0	0.033473
TCONS_00389082	XLOC_157285	XLOC_157285	0	0	0.004173	0	0	0	0	0	0
TCONS_00381657	XLOC_153885	XLOC_153885	0	0	0.039555	0	0	0	0	0	0
TCONS_00382021	ENSG00000120156	TEK	0	0	0.134738	0	0	0	0	0	0.010378
TCONS_00390352	XLOC_157937	XLOC_157937	0.005795	0	0.095075	0	0	0.017058	0.003411	0.017058	0.007473
TCONS_00383062	XLOC_154696	XLOC_154696	0.025143	0.005058	0.168384	0	0.025117	0.015197	0.008729	0.015197	0.006931
TCONS_00392582	XLOC_159217	XLOC_159217	0	0	0.081595	0.036462	0	0	0	0	0
TCONS_00392902	XLOC_159411	XLOC_159411	0.010342	0.006493	0.14157	0.006219	0.01976	0.006784	0.006963	0.006784	0
TCONS_00392915	XLOC_159417	XLOC_159417	0	0	0.078207	0.007073	0	0	0	0	0
TCONS_00385015	ENSG00000158169	FANCC	0.012473	0	0.164836	0	0	0	0	0	0.007356
TCONS_00393995	XLOC_159845	XLOC_159845	0	0	0.077664	0	0	0	0	0	0
TCONS_00394244	XLOC_160044	XLOC_160044	0	0	0.08325	0	0	0	0	0	0
TCONS_00394342	XLOC_160074	XLOC_160074	0	0	0.166835	0	0	0.001104	0	0.001104	0
TCONS_00386302	XLOC_156430	XLOC_156430	0.018541	0.001265	0.151243	0	0.007309	0	0.035321	0	0.015428
TCONS_00396139	XLOC_160899	XLOC_160899	0.015315	0	0.084785	0	0	0.016158	0	0.016158	0
TCONS_00388114	ENSG00000160293	VAV2	0.033509	0	0.127751	0	0	0	0	0	0
TCONS_00388479	XLOC_157123	XLOC_157123	0	0	0.023971	0	0	0	0	0	0
TCONS_00388718	ENSG00000176978	DPP7	0.001097	0	0.14184	0	0	0.000302	0	0.000302	0.001107
TCONS_00397399	XLOC_161357	XLOC_161357	0	0	0.097959	0	0	0	0	0	0
TCONS_00405217	XLOC_165197	XLOC_165197	0	0	0.116237	0	0	0.010605	0	0.010605	0
TCONS_00399021	XLOC_162168	XLOC_162168	0	0.010913	0.072752	0.023161	0.000262	0	0	0	0.001434
TCONS_00399145	ENSG00000147044	CASK	0	0	0.109496	0	0	0	0	0	0
TCONS_00402938	XLOC_164147	XLOC_164147	0	0	0.077007	0	0	0	0	0	0
TCONS_00410140	ENSG00000212747	RTL8B	0.556526	0	1.0219	0	0	0	0	0	0
TCONS_00403980	ENSG00000198753	PLXNB3	0.026355	0	0.164642	0	0	0.004752	0	0.004752	0
TCONS_00000217	XLOC_000146	XLOC_000146	0.021287	0	0.136897	0.006086	0.013619	0.017202	0.009563	0.017202	0.013698
TCONS_00010371	XLOC_004294	XLOC_004294	0	0	0.018586	0	0	0	0	0	0
TCONS_00036527	XLOC_014752	XLOC_014752	0	0	0.004023	0	0	0	0	0	0
TCONS_00038145	XLOC_015558	XLOC_015558	0	0	0.109143	0	0	0	0	0	0
TCONS_00048384	XLOC_020279	XLOC_020279	0	0	0.074417	0	0	0.014145	0	0.014145	0.002427
TCONS_00048530	ENSG00000095777	MYO3A	0	0	0.090294	0	0	0	0	0	0
TCONS_00041006	XLOC_016905	XLOC_016905	0	0	0.067117	0	0	0	0	0	0
TCONS_00065360	XLOC_027000	XLOC_027000	0	0	0.08325	0	0	0	0	0	0
TCONS_00079031	XLOC_032139	XLOC_032139	0	0	0.079286	0	0	0	0	0	0
TCONS_00091891	XLOC_036929	XLOC_036929	0	0	0.069611	0	0	0	0	0	0
TCONS_00100564	XLOC_040364	XLOC_040364	0	0	0.099009	0	0	0	0	0	0
TCONS_00105244	XLOC_042650	XLOC_042650	0	0	0.118554	0	0	0	0	0	0
TCONS_00107988	XLOC_044181	XLOC_044181	0	0	0.077654	0	0	0	0	0	0
TCONS_00111531	XLOC_045604	XLOC_045604	0.015541	0.024013	0.100707	0.015899	0	0	0	0	0
TCONS_00112252	XLOC_045843	XLOC_045843	0.023658	0	0.094616	0	0	0	0.013693	0	0.012497
TCONS_00124330	XLOC_050595	XLOC_050595	0	0	0.098306	0	0	0	0	0	0
TCONS_00151445	XLOC_059311	XLOC_059311	0	0	0.115031	0	0	0	0	0	0
TCONS_00153732	XLOC_059991	XLOC_059991	0	0	0.107036	0	0	0	0	0	0
TCONS_00174254	XLOC_066441	XLOC_066441	0	0	0.13535	0	0	0	0	0	0
TCONS_00174901	XLOC_066733	XLOC_066733	0	0	0.128587	0	0	0	0	0	0
TCONS_00179754	XLOC_068921	XLOC_068921	0	0	0.087177	0	0	0	0	0	0
TCONS_00179783	XLOC_068935	XLOC_068935	0	0	0.092097	0	0	0	0	0	0
TCONS_00220248	XLOC_083116	XLOC_083116	0	0.019938	0.117419	0	0	0	0	0	0.019193
TCONS_00206309	XLOC_077258	XLOC_077258	0	0.030793	0.18369	0	0	0	0	0	0.050427
TCONS_00206566	XLOC_077368	XLOC_077368	0	0	0.122666	0	0	0	0	0	0
TCONS_00207258	XLOC_077708	XLOC_077708	0	0	0.106625	0	0	0	0	0	0.019336
TCONS_00212648	XLOC_080075	XLOC_080075	0	0	0.093028	0.018784	0	0	0	0	0
TCONS_00231188	XLOC_087929	XLOC_087929	0	0	0.077916	0	0	0	0	0	0.01215
TCONS_00231404	XLOC_088012	XLOC_088012	0	0	0.126681	0	0	0	0	0	0
TCONS_00239811	XLOC_091419	XLOC_091419	0	0	0.088854	0	0	0.016187	0	0.016187	0.006481
TCONS_00238304	XLOC_090883	XLOC_090883	0	0	0.015344	0	0	0	0.001627	0	0
TCONS_00238465	ENSG00000124092	CTCFL	0	0	0.154874	0	0	0	0.000175	0	0
TCONS_00243687	XLOC_093312	XLOC_093312	0	0	0.101064	0	0	0	0	0	0
TCONS_00247887	XLOC_095180	XLOC_095180	0	0	0.088371	0	0	0	0	0	0
TCONS_00255946	XLOC_098301	XLOC_098301	0	0	0.021526	0	0	0	0	0	0
TCONS_00260226	XLOC_099736	XLOC_099736	0	0	0.03336	0	0	0.016735	0	0.016735	0
TCONS_00279877	XLOC_107621	XLOC_107621	0	0	0.084007	0	0	0	0	0	0
TCONS_00268839	XLOC_103322	XLOC_103322	0	0	0.079397	0	0	0	0	0	0
TCONS_00284821	XLOC_109608	XLOC_109608	0	0	0.098306	0	0	0	0	0	0
TCONS_00293488	XLOC_113789	XLOC_113789	0	0	0.077265	0	0	0	0	0	0
TCONS_00295024	XLOC_114585	XLOC_114585	0	0	0.109548	0	0	0.02901	0	0.02901	0
TCONS_00300332	ENSG00000154556	SORBS2	0	0	0.012114	0	0	0	0	0	0
TCONS_00300899	XLOC_117233	XLOC_117233	0	0	0.113616	0	0	0	0	0	0
TCONS_00303352	XLOC_118605	XLOC_118605	0	0	0.041127	0	0	0	0	0	0
TCONS_00323384	XLOC_127768	XLOC_127768	0.015507	0	0.102297	0	0	0	0	0	0
TCONS_00338170	XLOC_134887	XLOC_134887	0	0	0.088882	0	0	0	0.030953	0	0
TCONS_00327653	XLOC_129623	XLOC_129623	0	0	0.080355	0	0	0	0	0	0
TCONS_00330985	XLOC_131563	XLOC_131563	0	0	0.024726	0	0	0	0	0	0
TCONS_00355431	XLOC_142458	XLOC_142458	0	0	0.100081	0	0	0	0	0	0
TCONS_00366776	XLOC_147030	XLOC_147030	0	0	0.08852	0	0	0	0	0	0
TCONS_00367468	ENSG00000147570	DNAJC5B	0	0	0.053108	0	0	0	0	0	0
TCONS_00367495	XLOC_147424	XLOC_147424	0	0	0.032091	0	0	0	0	0	0
TCONS_00385507	XLOC_155961	XLOC_155961	0	0	0.080464	0	0	0.00393	0.044447	0.00393	0
TCONS_00397605	XLOC_161418	XLOC_161418	0	0	0.089717	0	0	0	0	0	0
TCONS_00404728	XLOC_164934	XLOC_164934	0	0	0.136901	0	0	0	0	0	0
TCONS_00398025	XLOC_161648	XLOC_161648	0	0	0.090596	0	0	0	0	0	0
TCONS_00408433	XLOC_166814	XLOC_166814	0	0	0.079666	0	0	0	0	0	0

## Sheet: lncRNA_UV_cluster 4
transcript_id	gene_id	gene_name	C_0	UV_3	UV_6	UV_9	UV_12	UV_24	UV_48	UV_24	UV_96
ENST00000589531	ENSG00000237491	AL669831.5	0	0	0	0.010026	0	0	0	0	0
ENST00000457084	ENSG00000237491	AL669831.5	0	0	0	0.105935	0.007244	0	0.001049	0	0.031014
ENST00000444276	ENSG00000232912	RERE-AS1	0	0	0	0.001739	0	0	0	0	0
ENST00000439577	ENSG00000227751	RCC2-AS1	0	0	0	0.025816	0	0	0	0	0
ENST00000437965	ENSG00000232298	AL138902.1	0	0	0.011379	0.013471	0	0	0	0	0
ENST00000652351	ENSG00000286061	RCAN3AS	0	0	0.00031	0.021813	0	0	0.000111	0	0
ENST00000610043	ENSG00000235790	AC114488.2	0	0	0	0.013971	0	0	0	0	0
ENST00000585413	ENSG00000235790	AC114488.2	0	0	0	0.007774	0	0	0	0	0
ENST00000609373	ENSG00000235790	AC114488.2	0	0	0	0.001186	0	0	0	0	0
ENST00000641271	ENSG00000284721	AL662907.3	0	0	0	0.003687	0	0	0	0	0.003143
ENST00000450713	ENSG00000238287	AL603839.3	0	0	0.008175	0.041411	0.025315	0	0	0	0
ENST00000432653	ENSG00000234578	AL355483.4	0	0	0.009552	0.02866	0	0	0	0	0
ENST00000635492	ENSG00000232453	AC105277.1	0	0	0	0.415041	0	0	0	0	0.004974
ENST00000414904	ENSG00000232284	GNG12-AS1	0	0	0	0.006158	0	0	0	0	0
ENST00000470869	ENSG00000243437	RN7SL370P	0	0	0	0.024265	0	0	0	0	0
ENST00000421331	ENSG00000235927	NEXN-AS1	0	0.012469	0	0.213487	0	0	0	0	0
ENST00000418242	ENSG00000226835	AC097059.1	0	0	0.003103	0.018079	0	0	0	0	0
ENST00000432195	ENSG00000225938	AL109741.1	0.00541	0.010996	0.015849	0.189359	0.013458	0.0039	0.004672	0.0039	0.01551
ENST00000457548	ENSG00000227045	AL589765.1	0	0	0	0.017949	0	0.009722	0	0.009722	0
ENST00000454467	ENSG00000227373	AL121983.2	0	0	0	0.006654	0	0	0	0	0
ENST00000648838	ENSG00000285894	AL136372.2	0	0	0	0.038354	0	0	0	0	0
ENST00000449492	ENSG00000236390	AC092800.1	0	0	0	0.002926	0	0	0	0	0
ENST00000421449	ENSG00000231871	IPO9-AS1	0	0.001497	0.007616	0.01372	0	0	0	0	0
ENST00000610948	ENSG00000153363	LINC00467	0	0	0	0.193102	0	0	0	0	0
ENST00000441790	ENSG00000228536	LYPLAL1-AS1	0	0	0	0.003051	0	0	0	0	0
ENST00000428148	ENSG00000226349	AC099066.1	0	0	0.011714	0.03014	0.011378	0	0	0	0
ENST00000649385	ENSG00000215808	LINC01139	0	0	0	0.022844	0	0	0.001742	0	0
ENST00000444330	ENSG00000225554	AL359764.1	0	0.00383	0.005118	0.219714	0	0	0.022812	0	0.007822
ENST00000449462	ENSG00000234091	AL157392.2	0	0	0	0.009162	0	0	0	0	0
ENST00000418966	ENSG00000230565	ZNF32-AS2	0	0	0	0.003893	0	0	0	0	0.001684
ENST00000620275	ENSG00000276544	RN7SL453P	0	0	0	0.010879	0	0	0	0	0
ENST00000615117	ENSG00000274186	RN7SL248P	0	0	0	0.010879	0	0	0	0	0
ENST00000414295	ENSG00000236958	AC051618.1	0	0	0	0.01706	0	0	0	0	0
ENST00000343087	ENSG00000223502	AL731537.1	0.03151	0	0.010975	0.052823	0	0	0	0	0.002793
ENST00000433019	ENSG00000224301	AL590502.1	0	0	0	0.000243	0	0	0	0	0
ENST00000431293	ENSG00000237768	AL731563.2	0	0	0	0.000492	0	0	0	0	0
ENST00000434097	ENSG00000228748	AL450306.1	0	0	0	0.001695	0	0	0	0	0
ENST00000372387	ENSG00000204049	AL391421.1	0.000451	0	0	0.001453	0	3.9e-05	0	3.9e-05	0
ENST00000412298	ENSG00000230091	TMEM254-AS1	0.001147	0	0	0.005446	0	0	0	0	0.003826
ENST00000425050	ENSG00000229981	LINC01435	0	0	0	0.014752	0	0	0	0	0
ENST00000627339	ENSG00000232934	AL157786.1	0	0	0	0.010285	0	0	0	0	0
ENST00000424422	ENSG00000232934	AL157786.1	0	0	0	0.051966	0	0	0	0	0
ENST00000455414	ENSG00000226900	AL451069.1	0.020824	0.032822	0.070934	0.131771	0.021548	0.002992	0	0.002992	0
ENST00000532946	ENSG00000255108	AP006621.1	0	0	0	5e-06	0	0	0	0	0
ENST00000529961	ENSG00000254444	AC022762.1	0	0	0	0.006024	0	0	0	0	0
ENST00000613468	ENSG00000273725	RF00017	0	0	0	0.011554	0	0	0.009208	0	0
ENST00000476130	ENSG00000254991	AC124276.1	0	0.037685	0.004742	0.051528	0	0	0.013037	0	0.000818
ENST00000527978	ENSG00000255308	AC009652.2	0	0	0	0.006196	0	0	0	0	0
ENST00000533049	ENSG00000254456	AC090592.1	0	0	0	0.005065	0	0	0	0	0
ENST00000533942	ENSG00000254456	AC090592.1	0	0	0	0.007553	0	0	0	0	0
ENST00000531157	ENSG00000254754	AC013799.1	0	0	0	0.009822	0	0	0	0	0
ENST00000511073	ENSG00000249867	AC090833.1	0.008524	0	0	0.071545	0	0	0.00216	0	0.002871
ENST00000544948	ENSG00000256481	AP006333.2	0.005382	0	0	0.009779	0	0	0	0	0
ENST00000581155	ENSG00000255468	AP001107.9	9.4e-05	0.020298	0.00104	0.09336	0.030949	0.015405	0.000677	0.015405	0.003309
ENST00000616071	ENSG00000275484	AP003419.3	0.409519	0.092537	0.176356	0.911885	0.094792	0.078466	0.051103	0.078466	0.044799
ENST00000530759	ENSG00000255135	AP002360.1	5e-06	0.002738	1.8e-05	7.58202	4.60046	4e-06	9e-06	4e-06	0.000112
ENST00000533697	ENSG00000254829	AP003032.2	0	0	0	0.02087	0	0	0	0	0
ENST00000532619	ENSG00000255384	AP001267.2	0	0	0	0.003432	0	0	0	0	0
ENST00000531886	ENSG00000255114	AP003392.3	0	0	0	0.004836	0	0	0	0	0
ENST00000501178	ENSG00000214772	AC010168.1	0	0	0	0.019836	0	0	0	0	0
ENST00000551974	ENSG00000257530	AC048344.1	0	0.006419	0	0.040596	0	0	0.041166	0	0
ENST00000553045	ENSG00000257433	AC004241.1	0.003638	0.089801	0.130944	0.4908	0.13454	0.001704	0.012748	0.001704	0.034368
ENST00000547387	ENSG00000258017	AC011603.2	0	0	0	0.232712	0	0	0	0	0
ENST00000548872	ENSG00000258057	BCDIN3D-AS1	0	0	0	0.0001	0	0	1e-06	0	1e-06
ENST00000552905	ENSG00000257337	AC068888.1	0	0	0	0.01104	0	0	0	0	0
ENST00000610219	ENSG00000224713	AC025165.1	0	0	0	0.000105	0	0	0	0	0
ENST00000550905	ENSG00000249550	LINC01234	0	0	0	0.005595	0	0	0	0	0
ENST00000539446	ENSG00000255857	PXN-AS1	3.2e-05	0	5e-06	0.000729	0	1e-06	1e-06	1e-06	0
ENST00000614177	ENSG00000256597	LINC02393	0	0	0	0.003592	0	0	0	0	0
ENST00000428419	ENSG00000237637	FRY-AS1	0	0	0	0.015986	0	0	0.007776	0	0
ENST00000456848	ENSG00000236036	LINC00445	0	0	0	0.00721	0	0	0	0	0
ENST00000615685	ENSG00000278390	AL354696.2	0	0	0	0.09293	0	0	0	0	0
ENST00000637462	ENSG00000283554	LINC02341	0	0	0	0.001833	0	0	0	0	0
ENST00000619472	ENSG00000227258	SMIM2-AS1	0	0	0	0.015561	0	0	0	0	0
ENST00000608779	ENSG00000224356	AL356966.1	0	0	0	0.009093	0	0	0	0	0.007918
ENST00000547175	ENSG00000257395	AL512310.2	0	0	0	0.000117	0	0	0	0	0
ENST00000555442	ENSG00000258616	LINC02303	0	0.013897	0	0.024156	0	0	0	0	0
ENST00000556390	ENSG00000258658	AL139021.2	0	0	0	0.017941	0	0	0	0	0
ENST00000623548	ENSG00000279636	AL132989.2	0	0	0	0.007798	9e-06	0.00022	0	0.00022	9e-06
ENST00000557544	ENSG00000258777	HIF1A-AS1	0	0	0.010131	0.174549	0.00311	0	0	0	0
ENST00000556646	ENSG00000257759	AL357153.2	0	0	0	0.015935	0.001578	0	0	0	0
ENST00000616634	ENSG00000274818	AC004825.2	0.012143	0.034443	0.043415	0.571426	0.04001	0.026763	0.012482	0.026763	0.023397
ENST00000536735	ENSG00000256357	AL132708.1	0.000786	0	0	0.003548	0	0.000131	0.001882	0.000131	0
ENST00000567527	ENSG00000261069	AC124312.3	3e-06	0.001298	1.2e-05	0.003743	0.000578	0	0	0	1e-06
ENST00000558245	ENSG00000259447	AC013652.2	0.000533	0	0.001739	0.005395	0	0	0	0	0
ENST00000561289	ENSG00000244879	GABPB1-AS1	0	0	0	0.071249	0	0	0.068214	0	0
ENST00000560359	ENSG00000244879	GABPB1-AS1	0.070647	0.013609	0.007349	0.309812	0.008161	0.005557	0.001185	0.005557	0.010065
ENST00000558237	ENSG00000259684	AC084756.1	0	0	0	0.011812	0	0	0	0	0
ENST00000560539	ENSG00000259426	AC027237.3	0	0	0	0.001355	0	0	0	0	0
ENST00000558702	ENSG00000259215	AC027237.2	0	0.005407	0.010641	0.020103	0	0.005224	0	0.005224	0
ENST00000645479	ENSG00000245750	DRAIC	0	0	0	0.001648	0	0	0	0	0
ENST00000566675	ENSG00000261801	LOXL1-AS1	0.002923	0.007245	0.00146	0.06606	0.003191	0.00151	0	0.00151	0.001886
ENST00000581311	ENSG00000266308	RN7SL510P	0.001798	0	0	0.003629	0	0	0	0	0
ENST00000459938	ENSG00000244056	RN7SL417P	0	0	0	0.053755	0	0.000737	0	0.000737	0
ENST00000613848	ENSG00000277582	RN7SL428P	0.006593	0	0	0.047529	0	0	0	0	0.00598
ENST00000558105	ENSG00000259736	CRTC3-AS1	0	0	0	3.2e-05	0	0	0	0	0
ENST00000561145	ENSG00000259553	AC140725.1	0.001269	0	0	0.002893	0	0	0	0	2.2e-05
ENST00000562838	ENSG00000260778	AC009065.4	0.046357	0.001075	0.00082	0.140942	0.000289	0	0	0	0.008088
ENST00000573802	ENSG00000205913	SRRM2-AS1	0	0.017842	0.068591	0.169784	0.049418	0	0	0	0
ENST00000570700	ENSG00000263011	AC108134.4	0	0.012949	0.012632	0.244772	0.016277	0	0	0	0.108123
ENST00000572691	ENSG00000263072	ZNF213-AS1	0	0	0.004992	0.019639	0	0	0	0	0
ENST00000565359	ENSG00000260601	AC131391.1	0.006061	0	0	0.013766	0	0	0	0	0
ENST00000635394	ENSG00000262454	MIR193BHG	0	0	0	0.040224	0	0	0	0	0
ENST00000641990	ENSG00000262454	MIR193BHG	0	0	0	0.015133	0	0	0	0	0
ENST00000562802	ENSG00000261216	AC007216.2	0.000684	0.00081	0	0.004555	0	9.5e-05	0	9.5e-05	0
ENST00000492268	ENSG00000242430	RN7SL274P	0	0	0	0.00965	0	0	0	0	0
ENST00000565782	ENSG00000260352	AC092287.1	0	0	0	0.035749	0	0	0	0	0.02915
ENST00000568506	ENSG00000261416	AC012645.3	0.003493	0	0	0.078343	0.00222	0	0	0	0
ENST00000564672	ENSG00000260545	AC026771.1	0	0	0	0.001403	0	0	0	0	0
ENST00000569125	ENSG00000261656	BEAN1-AS1	0	0	0	0.015652	0	0	0	0	0.001223
ENST00000575838	ENSG00000262136	AC092115.3	0.040359	0	0	0.063952	0	0	0	0	0
ENST00000558618	ENSG00000259209	AC004943.1	0	0	0	0.025922	0	0	0	0	0
ENST00000567317	ENSG00000260737	LINC01227	0	0.005171	0.006906	0.05885	0.010342	0	0.021014	0	0.010341
ENST00000652422	ENSG00000260896	ARLNC1	0	0	0	0.003896	0	0	0	0	0
ENST00000602617	ENSG00000270159	AC018695.3	0	0	0	0.006375	0	0	0	0	0
ENST00000568947	ENSG00000260923	LINC02193	0	0	0	0.019056	0	0	0	0	0
ENST00000573222	ENSG00000262089	AC040977.1	0	0	0	0.022017	0	0	0	0	0.014182
ENST00000445508	ENSG00000227274	AC005358.1	0	0	0	0.005339	0	0	0	0	0
ENST00000579352	ENSG00000264177	AL353997.2	0	0	0	0.000338	0	0	0	0	0
ENST00000577360	ENSG00000264273	AC107982.2	0	0	0	0.045532	0	0	0	0	0.027835
ENST00000582674	ENSG00000286194	AC138207.9	0	0	0	0.036962	0.002193	0	0	0	0
ENST00000588697	ENSG00000266947	AC022916.1	0	0	0	0.018067	0	0	0	0	0
ENST00000592422	ENSG00000267278	MAP3K14-AS1	0	0	0	0.021723	0	0	0	0	0.007369
ENST00000575126	ENSG00000262031	LINC01974	0	0	0.028059	0.03072	0	0	0	0	0
ENST00000579643	ENSG00000277198	RN7SL270P	0.003084	0	0	0.018002	0	0	0	0	0
ENST00000511627	ENSG00000253102	AC004707.1	0	0	0	0.002203	0	0	0	0	0
ENST00000576751	ENSG00000262079	AC007638.1	0	0	0	0.016241	0.005232	0.004207	0	0.004207	0
ENST00000583712	ENSG00000264985	AC124804.1	0	0	0	0.001659	0	0	0	0	0
ENST00000582668	ENSG00000263843	AC022211.2	0	0	0	0.028035	0	0	0	0	0
ENST00000648926	ENSG00000234912	SNHG20	0	0	0	0.002072	0	0	0	0	0
ENST00000649047	ENSG00000234912	SNHG20	0	0	0	0.520655	0	0	0	0	0
ENST00000591384	ENSG00000267123	SCAT1	0.007492	0	0.003261	0.063943	0	0.006662	0.051489	0.006662	0.00373
ENST00000611501	ENSG00000274833	AC110285.5	0	0	0	0.020336	0	0	0.013313	0	0
ENST00000572343	ENSG00000262898	AC139099.2	0	0	0	0.012018	0	0	0	0	0
ENST00000580267	ENSG00000266708	AP001793.1	0	0	0	0.009116	0	0	0	0	0
ENST00000577364	ENSG00000266844	AC093330.1	0	0	0	0.012715	0	0	0	0	0.011198
ENST00000622010	ENSG00000278107	AC027575.2	0	0.030148	0.036495	0.116495	0.015742	0.025605	0.007943	0.025605	0
ENST00000588226	ENSG00000267270	PARD6G-AS1	0	0.00882	0.027589	0.074846	0	0	0.038142	0	0
ENST00000631376	ENSG00000282591	FAM138F	0	0	0	0.002023	0	0	0	0	0
ENST00000632948	ENSG00000282591	FAM138F	0	0	0	0.004345	0	0	0	0	0
ENST00000590252	ENSG00000267092	AC027307.1	0.023592	0.002156	0.008627	0.05093	0.005561	0	0.000123	0	0.007948
ENST00000595644	ENSG00000269802	AC011491.3	0	0	0.013674	0.020392	0	0	0	0	0.002399
ENST00000586645	ENSG00000266904	LINC00663	0	0	0.002051	0.022999	0	0	0	0	0
ENST00000589910	ENSG00000266904	LINC00663	0	0	0	0.017842	0	0	0	0	0
ENST00000596326	ENSG00000269289	AC011503.1	0	0	0	0.029356	0	0	0	0	0
ENST00000590069	ENSG00000267555	AC008805.2	0.002889	0	0	0.012882	0	0.007251	0	0.007251	0.002712
ENST00000591531	ENSG00000267260	AC020928.2	4.1e-05	0	4.8e-05	0.006918	4.8e-05	0.005046	9.7e-05	0.005046	0
ENST00000590376	ENSG00000267345	AC010632.1	0.003953	0.001088	0	0.014473	0	0.000692	0.004151	0.000692	0
ENST00000596135	ENSG00000269843	AC008537.2	0	0	0	0.011643	0	0	0	0	0
ENST00000595201	ENSG00000268583	AC011466.1	0	0.112066	0	0.126708	0	0	0.010732	0	0.01369
ENST00000594379	ENSG00000269535	AC010320.4	0	0	0	0.003194	0	0	0	0	0
ENST00000595301	ENSG00000268201	AC020915.2	0.00043	0	0	0.024989	0.003075	0.009926	0	0.009926	0.002227
ENST00000425678	ENSG00000231083	AC011747.1	0	0.012221	0	0.015288	0	0	0	0	0
ENST00000438292	ENSG00000224184	MIR3681HG	0	0	0	0.057223	0	0.004699	0	0.004699	0
ENST00000648747	ENSG00000235537	AC009411.2	0	0	0	0.00483	0	0	0	0	0
ENST00000625728	ENSG00000234945	GTF3C2-AS1	0	0	0	0.010993	0	0	0	0	0
ENST00000626226	ENSG00000240401	AC012358.3	0	0	0	0.007993	0	0	0	0	0
ENST00000425966	ENSG00000229839	AC018462.1	0	0	0	0.003509	0	0	0	0	0
ENST00000629960	ENSG00000235885	LINC01828	0.034128	0	0	0.115018	0	0	0	0	0.012103
ENST00000401851	ENSG00000217702	AC073263.1	0	0	0	0.002066	0	0	0	0	0
ENST00000426715	ENSG00000237737	DCTN1-AS1	0.005143	0.009157	0.024127	0.031517	0	0	0	0	0
ENST00000652200	ENSG00000286045	AC005034.6	0	0	0	0.001923	0	0	0	0	0.00193
ENST00000603612	ENSG00000270996	AC005034.4	0	0	0.030837	0.03185	0.002326	0	0	0	0
ENST00000650829	ENSG00000286011	AC062037.3	0	0	0	0.031274	0	0.02281	0	0.02281	0
ENST00000430586	ENSG00000232034	AC092168.2	0	0	0	0.006182	0	0	0	0	0
ENST00000647942	ENSG00000226856	THORLNC	0	0	0	0.009369	0	0	0	0	0
ENST00000437837	ENSG00000235840	AC012363.2	0	0	0	0.011221	0	0	0	0	0
ENST00000595109	ENSG00000238057	ZEB2-AS1	0.000154	0	0	0.004167	0	0	0.001315	0	0
ENST00000453026	ENSG00000223960	PRKRA-AS1	0	0.000479	0.000231	0.01279	0	0	0.00097	0	0
ENST00000432711	ENSG00000234919	LINC01827	0	0	0	0.012687	0	0	0	0	0
ENST00000628897	ENSG00000226312	CFLAR-AS1	0	0	0	0.032558	0	0	0	0	0
ENST00000438824	ENSG00000225064	LINC01802	0	0	0	0.01795	0	0	0	0	0
ENST00000595058	ENSG00000227769	AC072062.1	0	0	0	0.014386	0	0	0	0	0
ENST00000652241	ENSG00000286059	AC005538.3	0	0	0	0.008661	0	0	0	0	0
ENST00000409526	ENSG00000222020	HDAC4-AS1	0	0	0	0.099271	0	0	0	0	0
ENST00000447206	ENSG00000230839	AL121760.1	0	0	0	0.042996	0	0.024915	0	0.024915	0
ENST00000319682	ENSG00000179447	AL049647.1	0	0	0	0.007186	0	0	0	0	0
ENST00000443171	ENSG00000230753	ZNF341-AS1	0	0	0	0.011719	0.000659	0	0	0	0
ENST00000427303	ENSG00000244558	KCNK15-AS1	0.002985	0	0.0035	0.045408	0	0.012827	0.004954	0.012827	0.013413
ENST00000624859	ENSG00000279094	LINC01670	0	0	0	0.006004	0	0	0	0	0
ENST00000623227	ENSG00000279094	LINC01670	0	0	0	0.036405	0	0	0	0	0
ENST00000621924	ENSG00000275496	CU633906.1	0.014247	0.002661	0.003925	0.264838	0.001968	0.007063	0.135358	0.007063	0.012092
ENST00000440052	ENSG00000238197	PAXBP1-AS1	0	0	0	0.068435	0	0	0	0	0
ENST00000600155	ENSG00000237945	LINC00649	0	0	0.01891	0.02381	0	0	0.006815	0	0
ENST00000413718	ENSG00000227702	LINC00111	0	0	0	0.023933	0	0	0.013959	0	0
ENST00000411694	ENSG00000225331	LINC01678	0	0	0	0.016589	0	0	0	0	0
ENST00000596207	ENSG00000267857	AL133499.1	0	0	0.004306	0.023547	0	0	0	0	0.001857
ENST00000579233	ENSG00000266503	RN7SL162P	0	0	0	0.018223	0.013163	0	0	0	0
ENST00000420171	ENSG00000230736	AL021937.1	0	0	0	0.001932	0	0	0	0	0
ENST00000415054	ENSG00000232754	AL035658.1	0.010027	0	0	0.018769	0	0	0	0	0
ENST00000625038	ENSG00000280224	AL008636.1	0	0	0.003147	0.007032	0	0	0	0	0
ENST00000446281	ENSG00000227110	LMCD1-AS1	0	0	0	0.006557	0	0	0	0	0
ENST00000519043	ENSG00000206573	THUMPD3-AS1	0	0.001787	0.000405	0.184262	0.007216	0	0.172365	0	0
ENST00000605014	ENSG00000240288	GHRLOS	0.021515	0	0	0.03419	0	0	0	0	0
ENST00000475197	ENSG00000231177	LINC00852	3e-05	7.9e-05	3.1e-05	0.037732	3.1e-05	6e-05	3.5e-05	6e-05	2e-06
ENST00000420195	ENSG00000224660	SH3BP5-AS1	0	0	0	0.058115	0	0	0	0	0
ENST00000594820	ENSG00000249786	EAF1-AS1	0	0	0	0.004397	0	0.001023	0	0.001023	0
ENST00000473031	ENSG00000241665	RN7SL418P	0	0	0	0.022448	0	0	0.008926	0	0
ENST00000631985	ENSG00000282527	AC110491.3	0	0	0	0.023189	0	0	0	0	0
ENST00000485473	ENSG00000206532	AC117402.1	0	0	0	0.046211	0	0	0	0	0
ENST00000608015	ENSG00000272758	AC083798.2	0	0	0	0.007676	0	0	0	0	0
ENST00000608346	ENSG00000272758	AC083798.2	0	0	0	0.033041	0.007905	0.001227	0	0.001227	0.006047
ENST00000463779	ENSG00000239437	RN7SL752P	0	0.016039	0	0.03708	0	0.012749	0	0.012749	0.012469
ENST00000493825	ENSG00000241570	PAQR9-AS1	0	0	0	0.006214	0	0	0	0	0
ENST00000486168	ENSG00000244040	IL12A-AS1	0	0	0	0.016712	0	0	0.009457	0	0
ENST00000423466	ENSG00000228561	AC026355.1	0	0	0	0.012154	0	0	0	0	0
ENST00000435560	ENSG00000229102	AC076966.1	0	0	0	0.005121	0	0	0	0	0
ENST00000422946	ENSG00000223882	ABCC5-AS1	0	0	0	0.008449	0	0	0	0	0
ENST00000609726	ENSG00000197099	AC068631.1	0	0	0	0.028475	0	0	0	0	0
ENST00000451982	ENSG00000242086	MUC20-OT1	0	0	0	0.006261	0	0	0.003644	0	0
ENST00000626904	ENSG00000242086	MUC20-OT1	0	0.001029	0	0.011897	0	0	0	0	0
ENST00000594101	ENSG00000242086	MUC20-OT1	0	0.000949	0	0.013132	0.004975	0	0	0	0
ENST00000420226	ENSG00000235897	TM4SF19-AS1	1e-05	6e-06	5e-06	0.141215	0.004054	0	1e-05	0	0.001895
ENST00000510073	ENSG00000251173	UCHL1-AS1	0	0	0	0.025116	0	0.015344	0	0.015344	0
ENST00000510212	ENSG00000234492	RPL34-AS1	0	0	0	0.020715	0	0	0	0	0.005064
ENST00000499359	ENSG00000247950	SEC24B-AS1	0	0	0	0.050256	0	0	0	0	0
ENST00000608663	ENSG00000273247	AC097376.2	0.006581	0	0	0.030361	0	0	0	0	0
ENST00000513067	ENSG00000250604	AC098679.1	0	0	0.025148	0.019612	0	0	0	0	0
ENST00000606513	ENSG00000272324	AC012629.2	0	0	0	0.028258	0	0	0	0	0
ENST00000636516	ENSG00000249740	OSMR-AS1	0	0.015515	0	0.016843	0	0	0	0	0
ENST00000507298	ENSG00000249736	LINC02242	0	0	0	0.011167	0	0	0	0	0
ENST00000651573	ENSG00000248942	LINC01335	0	0.003044	0	0.010168	0	0	0	0	0
ENST00000515356	ENSG00000250802	ZBED3-AS1	0	0	0	0.000548	0	0	0	0	0.000433
ENST00000639552	ENSG00000248309	MEF2C-AS1	0	0	0	0.000362	0	0	0	0	0
ENST00000611331	ENSG00000233828	LINC01949	0	0	0	0.003905	0	0	0	0	0
ENST00000606233	ENSG00000237187	NR2F1-AS1	0	0	0.003106	0.005989	0	0	0	0	0
ENST00000628324	ENSG00000253807	LINC01170	0	0	0	0.011013	0	0	0	0	0
ENST00000515808	ENSG00000250602	AC093535.1	0.005028	0	0	0.007682	0	0	0	0	0
ENST00000510230	ENSG00000249639	AC022092.1	0	0.007299	0	0.020739	0	0	0	0	0
ENST00000467868	ENSG00000241291	RN7SL791P	0	0	0	0.069399	0	0	0	0	0.018562
ENST00000607270	ENSG00000272239	AC011373.1	0	0	0	0.069453	0	0	0.01878	0	0
ENST00000519040	ENSG00000254333	NDST1-AS1	0	0.000165	0.000148	0.026607	0.001904	0	0	0	7.2e-05
ENST00000636261	ENSG00000249738	AC008691.1	0	0	0	0.013121	0	0	0	0	0
ENST00000636819	ENSG00000249738	AC008691.1	0	0	0	0.000314	0	0	0	0	0
ENST00000647982	ENSG00000285549	AC091973.1	0.00169	0	0	0.00598	0	0	0	0	0.004568
ENST00000606532	ENSG00000230314	ELOVL2-AS1	0	0.02814	0	0.055442	0	0	0	0	0
ENST00000437559	ENSG00000229896	AL157373.2	0	0	0	0.059034	0	0	0	0	0
ENST00000607445	ENSG00000229896	AL157373.2	0	0	0	0.009697	0	0	0	0	0.006781
ENST00000423260	ENSG00000229931	AL137003.1	0	0	0	0.177667	0	0	0	0	0
ENST00000646628	ENSG00000225914	TSBP1-AS1	0	0.0047	0	0.003863	0	0	0	0	0
ENST00000592785	ENSG00000226803	ZNF451-AS1	0.0228	0	0	0.025133	0	0.002389	0.00135	0.002389	0
ENST00000448363	ENSG00000224349	AL365226.1	0	0	0	0.034513	0	0	0.012053	0	0
ENST00000415736	ENSG00000226181	AL132671.1	0	0	0	0.004493	0	0	0	0	0
ENST00000456347	ENSG00000223586	LINC01312	0	0	0	0.026414	0	0.008758	0	0.008758	0.017724
ENST00000454588	ENSG00000227192	AL023581.2	0	0	0	0.013416	0	0	0	0	0
ENST00000627304	ENSG00000281021	AL078581.3	0	0	0	0.009621	0	0	0	0	0
ENST00000601203	ENSG00000268257	AIRN	0	0	0	0.001637	0	0	0	0	0
ENST00000421862	ENSG00000214870	AC004540.1	0	0	0	0.007708	0	0	0	0	0
ENST00000518046	ENSG00000253552	HOXA-AS2	0	0	0	0.099171	0	0	0	0	0
ENST00000432405	ENSG00000227658	AC005160.1	0	0	0	0.029741	0	0.010825	0.00369	0.010825	0
ENST00000439413	ENSG00000234707	AC074351.1	0	0	0	0.06433	0.0241	0	0.008714	0	0.004031
ENST00000490314	ENSG00000240790	AC073934.1	0	0	0	0.125744	0	0	0	0	0
ENST00000642963	ENSG00000285106	AC016831.7	0	0	0	0.043247	0.007182	0	0.008845	0	0
ENST00000497366	ENSG00000239377	AC073111.1	0	0	0	0.035459	0	0	0	0	0.028172
ENST00000431083	ENSG00000217825	AC099552.1	0	0.021779	0.015764	0.058466	0.007703	0	0.017587	0	0
ENST00000474963	ENSG00000216895	AC009403.1	0	0	0	0.014136	0	0	0	0	0
ENST00000518539	ENSG00000253696	KBTBD11-OT1	0	0	0	0.012097	0	0.009101	0	0.009101	0
ENST00000523884	ENSG00000245025	AC107959.1	0	0	0	0.080422	0	0	0	0	0
ENST00000518190	ENSG00000254349	MIR2052HG	0	0	0	0.021552	0	0	0	0	0
ENST00000520870	ENSG00000253526	AC090802.1	0	0	0	0.071322	0	0	0	0	0
ENST00000500705	ENSG00000245330	AP005717.1	0	0.004766	0	0.025959	0	0.007812	0.008028	0.007812	0.000152
ENST00000530350	ENSG00000255325	AC108136.1	0	0	0	0.055164	0	0	0	0	0.002969
ENST00000520031	ENSG00000253868	FER1L6-AS2	0	0	0	0.004508	0	0	0	0	0
ENST00000531948	ENSG00000255313	AC100858.2	0	0	0	0.014699	0	0	0	0	0
ENST00000652367	ENSG00000286010	AC108925.1	0	0	0	0.006223	0	0	0	0	0
ENST00000512617	ENSG00000249859	PVT1	0	0	0	0.046347	0	0	0	0	0
ENST00000652492	ENSG00000249859	PVT1	0	0	0	0.015405	0	0	0	0	0
ENST00000521207	ENSG00000253716	MINCR	0.000904	0.001887	0.017575	0.101416	0.012171	0	0	0	0.01328
ENST00000422420	ENSG00000240498	CDKN2B-AS1	0	0	0	0.023453	0	0	0.012383	0	0.014497
ENST00000441769	ENSG00000224854	CDKN2A-DT	0.000598	0.000706	0.003062	0.006958	0.000487	0.000565	0	0.000565	0.001477
ENST00000448858	ENSG00000237734	AL163192.1	0	0	0	0.004011	0	0	0	0	0
ENST00000433357	ENSG00000226562	CYP4F26P	0.018473	0	0	0.089007	0.011719	0	0	0	0
ENST00000627688	ENSG00000281128	PTENP1-AS	0	0	0	0.020472	0	0.008043	0	0.008043	0
ENST00000414515	ENSG00000204706	MAMDC2-AS1	0.003757	0.00445	0.004407	0.010241	0	0	0	0	0
ENST00000524818	ENSG00000254473	AL354920.1	0	0	0	0.059957	0	0.023558	0.027825	0.023558	0
ENST00000456944	ENSG00000224945	AL353150.1	0	0	0	0.003315	0	0	0	0	0
ENST00000439901	ENSG00000230782	AL807761.4	0	0	0	0.001006	0	0	0	0	0
ENST00000646338	ENSG00000228714	AL691420.1	0	0	0	0.009201	0	0	0	0	0
ENST00000647455	ENSG00000284977	AL160272.1	0	0	0	0.008481	0	0	0	0	0
ENST00000599172	ENSG00000268050	AL158151.3	0	0	0	0.077214	0	0	0	0	0
ENST00000432442	ENSG00000228543	AC003684.1	0	0	0	0.01248	0	0	0	0	0
ENST00000433499	ENSG00000237341	SYP-AS1	0	0	0	0.018894	0	0	0	0	0
ENST00000403371	ENSG00000220925	IGBP1-AS2	0	0	0	0.004134	0	0.001542	0	0.001542	0
ENST00000602812	ENSG00000230590	FTX	0	0	0	0.044172	0	0	0.019724	0	0.022336
ENST00000455395	ENSG00000230590	FTX	0.000463	0	0.002763	0.0047	0	0	0.001198	0	0
ENST00000413528	ENSG00000234050	Z95624.1	0	0.029717	0	0.032591	0	0	0	0	0
ENST00000431616	ENSG00000223546	LINC00630	0	0	0	0.00033	4e-06	4.9e-05	0	4.9e-05	0
ENST00000592070	ENSG00000227060	LINC00629	0	0	0	0.024857	0	0	0.014674	0	0
ENST00000641097	ENSG00000284743	AL139254.3	0	0	0	0.009559	0	0	0	0	0
ENST00000455038	ENSG00000203605	AC096543.1	0	0	0	0.009278	0	0	0	0	0
ENST00000415629	ENSG00000235011	AL353651.1	0	0	0	0.030566	0	0.013905	0	0.013905	0
ENST00000425010	ENSG00000236866	AL157902.1	0	0	0	0.00645	0	0	0	0	0
ENST00000423842	ENSG00000228067	LINC01740	0	0	0	0.040547	0	0	0	0	0.032408
ENST00000534135	ENSG00000255323	LINC01495	0	0	0	0.104	0	0	0	0	0
ENST00000505409	ENSG00000248990	AC100773.1	0	0	0	0.009461	0	0	0	0	0
ENST00000536495	ENSG00000256733	AP003721.2	0	0	0	0.009969	0	0	0	0	0
ENST00000552320	ENSG00000257906	LINC02156	0	0	0	0.008522	0	0	0	0	0
ENST00000585222	ENSG00000266505	AL354674.1	0	0	0	0.004021	0	0	0	0	0
ENST00000318245	ENSG00000178734	LMO7DN	0	0	0	0.005296	0	0	0	0	0
ENST00000438290	ENSG00000227640	SOX21-AS1	0	0	0	0.002178	0	0	0	0	0
ENST00000564841	ENSG00000260738	LINC00554	0	0	0	0.002377	0	0	0	0	0
ENST00000615095	ENSG00000260469	INSYN1-AS1	0	0	0	0.005829	0	0	0	0	0
ENST00000566218	ENSG00000260338	LINC01570	0	0	0	0.006943	0	0	0	0	0
ENST00000565549	ENSG00000261541	AC138915.3	8.9e-05	0	0	0.001709	0	0	0.000874	0	0
ENST00000577087	ENSG00000262681	AC005722.2	0	0	0	0.00633	0	0	0	0	0
ENST00000587907	ENSG00000266925	AC015818.8	0	0	0	0.004712	0	0	0	0	0.002364
ENST00000593234	ENSG00000267586	LINC00907	0	0	0	0.00106	0	0	0	0	0
ENST00000618730	ENSG00000278607	AC015819.2	0	0	0	0.090285	0	0	0	0	0
ENST00000577797	ENSG00000266614	AC103808.5	0	0	0	0.030988	0	0	0	0	0
ENST00000587174	ENSG00000266924	AC021594.1	0.012389	0	0	0.045995	0	0	0	0	0.022657
ENST00000627215	ENSG00000281162	LINC01127	0	0	0	0.001946	0	0	0	0	0
ENST00000431979	ENSG00000224559	LINC01087	0	0	0	0.002036	0	0	0	0	0
ENST00000358775	ENSG00000196758	AC079612.1	0	0	0	0.003869	0	0	0	0	0
ENST00000430635	ENSG00000230978	LINC00160	0	0	0	0.009985	0	0	0	0	0
ENST00000623199	ENSG00000279442	AP000542.2	0	0	0	0.001158	0	0	0	0	0
ENST00000618466	ENSG00000275319	RF00017	0	0	0	0.022502	0	0	0	0	0
ENST00000432473	ENSG00000229891	LINC01315	0	0	0	0.009085	0	0	0	0	0
ENST00000364445	ENSG00000201315	RN7SKP227	0	0	0	0.011714	0	0	0	0	0
ENST00000473938	ENSG00000242781	LINC02050	0	0	0	0.0187	0	0	0	0	0.015516
ENST00000472120	ENSG00000239205	LINC02023	0	0	0	0.007349	0	0	0	0	0
ENST00000356560	ENSG00000203436	RF00017	0	0	0	0.044665	0	0	0	0	0
ENST00000509964	ENSG00000250819	LINC02493	0	0	0	0.008402	0	0	0.0055	0	0
ENST00000508135	ENSG00000249831	AC093725.1	0	0	0	0.002679	0	0	0	0	0
ENST00000508486	ENSG00000250313	LINC02229	0	0	0	0.005415	0	0	0	0	0
ENST00000517335	ENSG00000245812	LINC02202	0	0	0	0.005279	0	0	0	0	0
ENST00000523301	ENSG00000245812	LINC02202	0	0	0	0.017271	0	0	0.013528	0	0
ENST00000566892	ENSG00000260484	AC131902.2	0	0	0	0.003296	0	0	0	0	0
ENST00000516031	ENSG00000251840	RN7SKP155	0	0	0	0.024855	0	0	0	0	0
ENST00000615199	ENSG00000275239	FAM242F	0	0	0	0.000398	0	0	0	0	0
ENST00000421507	ENSG00000226566	AL390962.1	0	0	0.0168	0.039838	0	0	0	0	0
ENST00000649774	ENSG00000285899	AL023574.1	0	0	0	0.015101	0	0	0.009595	0	0.005564
ENST00000458667	ENSG00000230663	FAM224B	0	0	0	0.001761	0	0	0	0	0
TCONS_00023873	ENSG00000236782	AL391650.1	0	0	0	1e-05	0	0	0	0	0
TCONS_00023994	ENSG00000117713	ARID1A	0	0	0	0.086394	0	0	0	0	0
TCONS_00005572	ENSG00000116885	OSCP1	0.029316	0.027691	0.049676	0.174779	0.007225	0.034	0.010106	0.034	0.022651
TCONS_00008175	ENSG00000184588	PDE4B	0	0	0	0.27208	0	0	0	0	0
TCONS_00008497	ENSG00000197568	HHLA3	0	0	0	0.114612	0	0	0	0	0
TCONS_00008498	ENSG00000197568	HHLA3	0	0	0	0.587932	0	0	0	0	0
TCONS_00008943	XLOC_003610	XLOC_003610	0	0	0.000626	0.024953	0	0.000359	0	0.000359	0.002614
TCONS_00008940	XLOC_003610	XLOC_003610	0	0	0	0.006021	0.00184	0	0	0	0
TCONS_00028194	ENSG00000142875	PRKACB	0	0	0	0.08343	0	0	0	0	0
TCONS_00009950	XLOC_004100	XLOC_004100	0.013172	0.00047	0	0.112461	0.002264	0.003007	0	0.003007	0.000904
TCONS_00010345	XLOC_004270	XLOC_004270	0.013225	0	0	0.095819	0	0	0	0	0
TCONS_00010826	XLOC_004440	XLOC_004440	0.024624	0	0	0.040373	0	0	0.012698	0	0
TCONS_00011087	ENSG00000143110	C1orf162	0	0	0	0.043473	0.00621	0.017774	0	0.017774	0
TCONS_00030592	XLOC_012403	XLOC_012403	0.004332	0	0.011539	0.061008	0	0.028095	0.00639	0.028095	0.013646
TCONS_00030674	XLOC_012452	XLOC_012452	0	0	0	0.10035	0	0	0	0	0
TCONS_00031925	ENSG00000197622	CDC42SE1	0	0.014508	0.043032	0.138015	0	0	0.043326	0	0.038774
TCONS_00014347	ENSG00000162734	PEA15	0	0.662461	0	8.07823	1.06433	0.331921	1.32559	0.331921	0.736049
TCONS_00033921	ENSG00000143248	RGS5	0	0	0	0.025716	0	0	0	0	0
TCONS_00015767	ENSG00000230124	ACBD6	0	0	0	0.269105	0	0	0	0	0
TCONS_00035901	XLOC_014462	XLOC_014462	0	0	0	0.094499	0	0.017451	0	0.017451	0
TCONS_00036392	XLOC_014681	XLOC_014681	0	0	0	0.090953	0	0	0	0	0
TCONS_00018303	XLOC_007427	XLOC_007427	0	0	0.014809	0.035846	0	0	0	0	0
TCONS_00037036	ENSG00000092969	TGFB2	0	0.004118	0	0.067691	0.010234	0	0	0	0
TCONS_00037183	ENSG00000116141	MARK1	0	0	0	0.150978	0	0	0	0	0
TCONS_00038818	ENSG00000121644	DESI2	0	0	0.096399	0.096488	0	0	0	0	0
TCONS_00020447	ENSG00000203667	COX20	0	0	0	0.05523	0	0	0	0	0
TCONS_00039331	ENSG00000107929	LARP4B	0	0.00549	0.158715	0.225801	0	0	0	0	0
TCONS_00039402	ENSG00000067057	PFKP	0	0	0.047511	0.055205	0	0	0	0	0
TCONS_00048399	XLOC_020288	XLOC_020288	0	0	0	0.202336	0	0	0	0	0
TCONS_00040789	ENSG00000150054	MPP7	0	0	0	0.140371	0	0	0	0	0.007059
TCONS_00048826	XLOC_020499	XLOC_020499	0.012292	0	0.034894	0.066855	0	0	0	0	0
TCONS_00040948	ENSG00000148516	ZEB1	0	0.037315	0	0.085218	0	0	0	0	0.044985
TCONS_00042200	XLOC_017488	XLOC_017488	0.002104	0	0.001104	0.01659	0	0	0	0	0.00307
TCONS_00043214	ENSG00000176986	SEC24C	0.032575	0.062861	0.035098	0.221378	0	0.014853	0	0.014853	0
TCONS_00043432	ENSG00000148655	LRMDA	0	0	0	0.000141	0	0	0	0	0
TCONS_00043613	XLOC_018119	XLOC_018119	0	0	0	0.175987	0	0.02376	0	0.02376	0
TCONS_00052406	ENSG00000171307	ZDHHC16	0	0	0	0.079709	0.038851	0	0	0	0
TCONS_00045565	XLOC_018960	XLOC_018960	0	0	0	0.088683	0.025624	0	0	0	0
TCONS_00053195	XLOC_022518	XLOC_022518	0	0	0	0.033495	0	0	0.000342	0	0
TCONS_00045783	XLOC_019083	XLOC_019083	0	0	0	0.060154	0	0	0	0	0
TCONS_00046441	ENSG00000203805	PLPP4	0	0	0	0.06573	0	0	0	0	0
TCONS_00054329	XLOC_023067	XLOC_023067	0	0	0	0.096213	0	0	0	0	0
TCONS_00046924	XLOC_019576	XLOC_019576	0	0.008168	0	0.165968	0	0.028811	0.002897	0.028811	0.051727
TCONS_00047019	ENSG00000148814	LRRC27	0.009597	0	0	0.092323	0	0	0	0	0.001663
TCONS_00067489	ENSG00000166368	OR2D2	0	0	0	0.015818	0	0.00599	0	0.00599	0
TCONS_00056760	ENSG00000070081	NUCB2	0	0	0	0.400133	0	0	0	0	0.004797
TCONS_00068667	ENSG00000166833	NAV2	0	0	0	0.023597	0	0	0	0	0
TCONS_00057184	ENSG00000187398	LUZP2	0.004914	0	0.050436	0.22259	0	0	0	0	0
TCONS_00069076	XLOC_028395	XLOC_028395	0.02387	0	0	0.130473	0.03265	0	0.014243	0	0
TCONS_00057383	ENSG00000169519	METTL15	0	0	0	0.002104	0	0	0	0	0
TCONS_00070763	XLOC_029110	XLOC_029110	0	0.034288	0	0.079941	0.020712	0	0	0	0.00943
TCONS_00060022	ENSG00000188070	C11orf95	0	0	0	0.07176	0	0	0.004308	0	0
TCONS_00073266	ENSG00000162105	SHANK2	0.002911	0	0	0.047805	0	0	0	0	0
TCONS_00062088	XLOC_025757	XLOC_025757	0	0	0.001057	0.081858	0	0	0	0	0
TCONS_00073655	ENSG00000054965	FAM168A	0	0	0.085547	0.147692	0	0	0	0	0
TCONS_00062529	ENSG00000179240	GVQW3	0.005435	0	0	0.030374	0.000302	0.001906	0	0.001906	0.000708
TCONS_00063212	XLOC_026166	XLOC_026166	0	0.226495	0	0.362764	0	0	0	0	0
TCONS_00063255	XLOC_026182	XLOC_026182	0	0	0	0.276371	0	0	0	0	0.069747
TCONS_00064241	XLOC_026686	XLOC_026686	0	0	0	0.061709	0.027036	0	0	0	0
TCONS_00076480	ENSG00000180425	C11orf71	0	0	0.027842	0.161715	0	0.096542	0	0.096542	0.009694
TCONS_00077030	XLOC_031450	XLOC_031450	0	0	0	0.001862	0	0	0	0	0
TCONS_00077032	XLOC_031450	XLOC_031450	0	0	0	0.04706	0	0	0	0	0
TCONS_00077023	XLOC_031450	XLOC_031450	0	0	0	0.071643	0.047446	0	0	0	0
TCONS_00077040	ENSG00000137699	TRIM29	0	0	0	0.00203	0	0	0	0	0
TCONS_00065646	ENSG00000165495	PKNOX2	0	0	0	0.047593	0	0	0	0	0
TCONS_00066006	ENSG00000134909	ARHGAP32	0	0	0	0.078431	0	0.003326	0	0.003326	0.050079
TCONS_00091143	XLOC_036556	XLOC_036556	0	0	0	0.070386	0.030228	0	0	0	0
TCONS_00091606	ENSG00000139131	YARS2	0.016008	0	0.003	0.165313	0.003086	0	0	0	0.010476
TCONS_00081314	ENSG00000179715	PCED1B	0.001219	0.002624	0.001306	0.038929	0.004161	0	0.00238	0	0.005068
TCONS_00093070	ENSG00000196876	SCN8A	0.017694	0.017798	0	0.12517	0	0.010931	0	0.010931	0.075932
TCONS_00093077	ENSG00000196876	SCN8A	0	0	0	0.024734	0	0	0	0	0
TCONS_00082369	ENSG00000167778	SPRYD3	0	0	0	0.168343	0	0.008488	0	0.008488	0
TCONS_00082567	ENSG00000012822	CALCOCO1	0	0	0	0.112751	0	0.006765	0	0.006765	0
TCONS_00096205	XLOC_038670	XLOC_038670	0	0	0	0.076696	0	0	0	0	0
TCONS_00096613	ENSG00000185046	ANKS1B	0	0	0	0.026822	0	0	0	0	0
TCONS_00099009	XLOC_039593	XLOC_039593	0	0	0.016123	0.110309	0	0	0	0	0
TCONS_00099551	XLOC_039840	XLOC_039840	0	0	0	0.073293	0	0	0.058536	0	0
TCONS_00100390	XLOC_040235	XLOC_040235	0	0	0	0.079831	0	0	0	0	0
TCONS_00104900	XLOC_042466	XLOC_042466	0	0	0	0.087578	0	0	0.037347	0	0
TCONS_00101878	ENSG00000136098	NEK3	0	0.056856	0.016925	0.187846	0.018423	0	0.032657	0	0.013609
TCONS_00106868	ENSG00000188243	COMMD6	0	0	0	0.113222	0	0	0	0	0
TCONS_00107715	XLOC_044022	XLOC_044022	0	0	0	0.060663	0	0	0	0	0
TCONS_00108006	ENSG00000068650	ATP11A	0	0	0	0.12659	0	0	0	0	0
TCONS_00108007	ENSG00000068650	ATP11A	0	0	0.005637	0.084329	0	0.005065	0	0.005065	0
TCONS_00109623	ENSG00000092148	HECTD1	0	0	0	0.143847	0	0	0	0	0
TCONS_00110630	ENSG00000125378	BMP4	0	0	0	0.110869	0.014563	0	0.007561	0	0.01611
TCONS_00118239	ENSG00000140015	KCNH5	0	0	0	0.100029	0	0	0	0	0
TCONS_00118271	ENSG00000154001	PPP2R5E	0	0.002218	0.003842	0.151648	0.002193	0.002438	0.002228	0.002438	0
TCONS_00112826	XLOC_046064	XLOC_046064	0	0	0.032098	0.10035	0	0	0.055474	0	0.02368
TCONS_00119955	XLOC_048921	XLOC_048921	0	0	0	0.096733	0	0	0	0	0.004487
TCONS_00112943	ENSG00000185070	FLRT2	0.001684	0.004898	0.008152	0.034151	0	0.001621	0.00511	0.001621	0
TCONS_00132271	XLOC_053474	XLOC_053474	0	0	0.0201	0.069837	0.006818	0.009357	0	0.009357	0.007029
TCONS_00128189	XLOC_051972	XLOC_051972	0	0	0	0.025125	0.018161	0	0	0	0
TCONS_00128244	ENSG00000182854	OR4F15	0	0	0.067113	0.115413	0	0	0	0	0.018968
TCONS_00137061	ENSG00000187555	USP7	0	0.026958	0.028837	0.060921	0	0	0	0	0
TCONS_00146345	ENSG00000133392	MYH11	0.002364	0	0	0.030358	0	0.000609	0	0.000609	0.019237
TCONS_00146828	ENSG00000196678	ERI2	0	0	0	0.08859	0	0.003332	0	0.003332	0
TCONS_00146897	ENSG00000169246	NPIPB3	0	0	0	0.183237	0	0	0	0	0
TCONS_00139575	XLOC_055724	XLOC_055724	0	0	0	0.060835	0	0	0	0	0
TCONS_00140241	ENSG00000177200	CHD9	0	0.025777	0	0.0402	0	0.023886	0	0.023886	0
TCONS_00142258	ENSG00000103043	VAC14	0	0.003706	0	0.082544	0	0.007958	0	0.007958	0
TCONS_00162896	ENSG00000181031	RPH3AL	0	0	0	0.034846	0.010836	0	0	0	0
TCONS_00152948	XLOC_059785	XLOC_059785	0	0	0	0.023196	0	0	0	0	0
TCONS_00163842	XLOC_063213	XLOC_063213	0	0	0	0.073797	0	0	0	0	0
TCONS_00164877	ENSG00000006695	COX10	0	0	0	0.05525	0	0	0	0	0
TCONS_00166406	ENSG00000108262	GIT1	0	0.015804	0	0.066889	0.011917	0	0.020901	0	0
TCONS_00167790	XLOC_064469	XLOC_064469	0	0	0	0.094188	0	0	0	0	0
TCONS_00172012	ENSG00000133193	FAM104A	0.002348	0	0	0.034096	0	0	0	0	0
TCONS_00171991	ENSG00000166685	COG1	0	0.107857	0.050946	0.186305	0.014374	0	0.002051	0	0
TCONS_00161727	XLOC_062648	XLOC_062648	0.002419	0	0	0.061313	0	0	0	0	0.042143
TCONS_00173876	XLOC_066296	XLOC_066296	0	0	0	0.064489	0	0	0	0	0
TCONS_00174554	XLOC_066568	XLOC_066568	0.002099	0.013498	0.011914	0.073184	0.002901	0.007425	0.013579	0.007425	0
TCONS_00178455	ENSG00000154864	PIEZO2	0	0	0.001761	0.186317	0.113514	0	0	0	0.000104
TCONS_00175071	XLOC_066775	XLOC_066775	0	0	0	0.067516	0	0	0	0	0
TCONS_00179298	XLOC_068731	XLOC_068731	0	0	0	0.046847	0	0	0	0	0
TCONS_00180193	ENSG00000134030	CTIF	0	0.019013	0	0.04571	0	0	0.010143	0	0
TCONS_00180237	XLOC_069154	XLOC_069154	0	0	0	0.061938	0	0	0	0	0
TCONS_00180475	XLOC_069232	XLOC_069232	0.018167	0	0	0.063002	0	0	0	0	0
TCONS_00185352	ENSG00000127527	EPS15L1	0.079172	0	0	0.082249	0	0	0	0	0
TCONS_00198885	ENSG00000197808	ZNF461	0.024582	0	0.001412	0.074772	0.007577	0.001913	0.002327	0.001913	0.006606
TCONS_00188640	ENSG00000160460	SPTBN4	0.033293	0	0	0.135506	0	0.035339	0	0.035339	0
TCONS_00201197	XLOC_075502	XLOC_075502	0	0	0.091424	0.149107	0	0	0	0	0.025952
TCONS_00191443	ENSG00000198482	ZNF808	0	0	0	0.079241	0	0.009078	0	0.009078	0
TCONS_00203203	ENSG00000179954	SSC5D	0	0.015047	0	0.040105	0	0	0.022621	0	0
TCONS_00192532	ENSG00000186230	ZNF749	0	0	0	0.132485	0	0	0	0	0
TCONS_00204087	XLOC_076305	XLOC_076305	0	0	0	0.095075	0	0	0	0	0
TCONS_00220409	XLOC_083212	XLOC_083212	0	0	0	0.071663	0	0	0	0	0.057962
TCONS_00205013	ENSG00000084676	NCOA1	0.002323	0	0	0.017036	0	0	0	0	0.010691
TCONS_00221580	ENSG00000205221	VIT	0	0	0	0.075616	0	0.03957	0	0.03957	0
TCONS_00221988	XLOC_083848	XLOC_083848	0	0	0	0.086046	0	0	0	0	0
TCONS_00207255	XLOC_077707	XLOC_077707	0	0	0	0.153366	0	0	0	0	0
TCONS_00223865	XLOC_084594	XLOC_084594	0	0	0	0.059714	0	0	0	0	0
TCONS_00209818	ENSG00000135976	ANKRD36	0.006866	0.312349	0.43743	0.804061	0.007125	0.018957	0	0.018957	0.014876
TCONS_00225688	ENSG00000168658	VWA3B	0	0	0	0.081344	0	0	0	0	0
TCONS_00210073	ENSG00000241962	AC079447.1	6.2e-05	0	0	0.007734	0	0	0	0	0
TCONS_00210271	ENSG00000115594	IL1R1	0	0.001686	0	0.06904	0.017415	0	0.005897	0	0
TCONS_00210502	XLOC_079115	XLOC_079115	0	0	0	0.046972	0	0	0	0	0
TCONS_00226946	XLOC_085905	XLOC_085905	0	0	0	0.149131	0	0	0	0	0
TCONS_00211615	ENSG00000074047	GLI2	0	0	0	0.108043	0	0.003466	0	0.003466	0
TCONS_00212299	XLOC_079897	XLOC_079897	0	0	0	0.081524	0	0.011619	0	0.011619	0
TCONS_00227867	ENSG00000176771	NCKAP5	0	0	0	0.077526	0	0	0.015902	0	0.013439
TCONS_00228410	XLOC_086680	XLOC_086680	0	0.08382	0	0.230215	0	0	0	0	0.075597
TCONS_00228417	XLOC_086718	XLOC_086718	0.011965	0.025511	0.028688	0.064104	0.000551	0.009144	0	0.009144	0
TCONS_00229343	XLOC_087141	XLOC_087141	0	0	0.059057	0.163613	0	0.037316	0.024392	0.037316	0.041179
TCONS_00213626	ENSG00000178662	CSRNP3	0.066246	0	0.01085	0.157011	0	0.003	0	0.003	0
TCONS_00231227	XLOC_087955	XLOC_087955	0	0	0	0.064104	0.013928	0.010414	0	0.010414	0
TCONS_00232446	ENSG00000115425	PECR	0.005144	0	0	0.124736	0.011116	0.008299	0	0.008299	0.0057
TCONS_00216843	ENSG00000079308	TNS1	0.041805	0	0	0.068267	0	0	0	0	0.018085
TCONS_00217374	XLOC_082000	XLOC_082000	0	0	0	0.116995	0	0	0	0	0.046515
TCONS_00233192	XLOC_088691	XLOC_088691	0.016354	0.007556	0.019477	0.089684	0	0	0	0	0.052509
TCONS_00217862	ENSG00000079263	SP140	0	0	0	0.095507	0	0	0	0	0.002238
TCONS_00218127	ENSG00000144535	DIS3L2	0	0	0.021266	0.218749	0	0	0	0	0
TCONS_00218346	ENSG00000077044	DGKD	0.01833	0.007396	0.041909	0.150576	0.008694	0.014245	0	0.014245	0.001937
TCONS_00236805	ENSG00000080839	RBL1	0.004524	0.044646	0	0.084712	0	0	0	0	0.012841
TCONS_00237033	ENSG00000101452	DHX35	0	0	0	0.042584	0	0	0	0	0
TCONS_00237790	ENSG00000124151	NCOA3	0.002973	0	0.032515	0.15121	0	0	0	0	0
TCONS_00242852	XLOC_092841	XLOC_092841	0.011014	0	0	0.089608	0	0.021783	0	0.021783	0.025652
TCONS_00238018	XLOC_090715	XLOC_090715	0	0	0	0.065535	0	0	0	0	0
TCONS_00243061	ENSG00000196396	PTPN1	0	0	0	0.095594	0	0	0	0	0.003409
TCONS_00239215	ENSG00000171703	TCEA2	0	0	0	0.017963	0	0.012881	0	0.012881	0.007399
TCONS_00239208	ENSG00000196421	C20orf204	0	0	0	0.024806	0	0	0	0	0
TCONS_00244230	XLOC_093488	XLOC_093488	0	0.029205	0	0.077181	0	0.019863	0	0.019863	0
TCONS_00245127	XLOC_093983	XLOC_093983	0	0	0.009028	0.079532	0.015	0.012253	0	0.012253	0
TCONS_00249039	ENSG00000160190	SLC37A1	0	0	0	0.037296	0	0	0	0	0
TCONS_00249134	XLOC_095710	XLOC_095710	0.005956	0	0	0.113785	0	0.025042	0.005034	0.025042	0.002558
TCONS_00256440	ENSG00000100281	HMGXB4	0.001403	0.020308	0.012266	0.083763	0	0.008682	0.000596	0.008682	0
TCONS_00252490	XLOC_097050	XLOC_097050	0	0	0	0.123926	0	0	0	0	0
TCONS_00253458	ENSG00000248405	PRR5-ARHGAP8	0.034392	0	0	0.062999	0	0.032654	0	0.032654	0
TCONS_00258161	XLOC_099087	XLOC_099087	0.053505	0.017344	0	0.173206	0.028375	0.009191	0	0.009191	0.017856
TCONS_00270912	ENSG00000144455	SUMF1	0	0	0	0.413354	0	0	0	0	0
TCONS_00259567	XLOC_099463	XLOC_099463	0	0	0	0.06871	0	0.023178	0	0.023178	0.033773
TCONS_00272059	XLOC_104439	XLOC_104439	0	0	0	0.06466	0	0.000353	0	0.000353	0
TCONS_00260041	ENSG00000151093	OXSM	0	0	0	0.115961	0	0	0	0	0.003336
TCONS_00260758	ENSG00000093217	XYLB	0	0.011993	0.127883	0.246729	0	0	0	0	0
TCONS_00261366	XLOC_100117	XLOC_100117	0	0	0	0.082037	0	0	0	0	0
TCONS_00274766	XLOC_105344	XLOC_105344	0	0.021356	0	0.05141	0	0	0.037916	0	0
TCONS_00263558	ENSG00000187098	MITF	0.017489	0.005747	0.016193	0.150214	0.038255	0.009036	0.049347	0.009036	0.008015
TCONS_00265777	ENSG00000160145	KALRN	0.001841	0	0	0.001913	0	0	0	0	3.9e-05
TCONS_00280298	ENSG00000260234	AC020636.2	0	0	0	0.003122	0	0	0	0	0
TCONS_00280356	XLOC_107860	XLOC_107860	0	0	0	0.104386	0	0.030996	0.008073	0.030996	0.005928
TCONS_00285184	ENSG00000109689	STIM2	0	0	0.003517	0.100219	0.002468	0.00725	0	0.00725	0
TCONS_00285685	ENSG00000064042	LIMCH1	0	0	0	0.057796	0	0	0	0	0.008446
TCONS_00294510	ENSG00000135605	TEC	0	0	0	0.125318	0.021916	0.007282	0	0.007282	0.011843
TCONS_00294769	XLOC_114473	XLOC_114473	0	0	0	0.048497	0	0	0	0	0.02918
TCONS_00295426	XLOC_114796	XLOC_114796	0	0	0	0.063986	0	0	0	0	0
TCONS_00288658	ENSG00000145362	ANK2	0	0.005566	0.002594	0.088348	0	0	0	0	0
TCONS_00289607	ENSG00000153130	SCOC	0.119377	0.02324	0.335251	0.692296	0	0.019567	0	0.019567	0
TCONS_00299076	ENSG00000164144	ARFIP1	0	0	0	0.073329	0	0	0	0	0
TCONS_00299191	XLOC_116349	XLOC_116349	0	0	0	0.048696	0.015967	0	0.020189	0	0
TCONS_00290808	XLOC_112427	XLOC_112427	0	0	0.04226	0.154539	0	0.094221	0	0.094221	0
TCONS_00290960	ENSG00000109572	CLCN3	0.003426	0	0.000893	0.061694	0.002964	0.000657	0	0.000657	0.006265
TCONS_00291276	XLOC_112682	XLOC_112682	0	0.003841	0	0.360669	0	0.004316	0.004078	0.004316	0.009368
TCONS_00312063	XLOC_122288	XLOC_122288	0	0	0	0.010813	0	0	0	0	0
TCONS_00301288	XLOC_117435	XLOC_117435	0	0	0	0.087372	0.009489	0	0	0	0
TCONS_00312270	XLOC_122416	XLOC_122416	0	0	0.031004	0.073385	0	0	0	0	0.022321
TCONS_00314502	ENSG00000113448	PDE4D	0.002913	0	0	0.156155	0.002697	0.003162	0.004693	0.003162	0.005926
TCONS_00303640	XLOC_118723	XLOC_118723	0	0	0	0.094157	0	0	0.114667	0	0
TCONS_00304144	XLOC_118890	XLOC_118890	0	0.046042	0	0.124755	0	0	0	0	0
TCONS_00306091	XLOC_119863	XLOC_119863	0	0	0	0.103224	0	0	0	0	0
TCONS_00307334	ENSG00000283782	AC116366.3	0.006018	0	0.003399	0.176717	0	0	0	0	0
TCONS_00308947	ENSG00000173210	ABLIM3	0.013151	0	0.001665	0.123544	0	0.009454	0.009023	0.009454	0.012868
TCONS_00309438	XLOC_121202	XLOC_121202	0.018963	0	0	0.079536	0	0	0	0	0
TCONS_00320957	ENSG00000134516	DOCK2	0	0	0	0.070179	0	0	0	0	0
TCONS_00321978	ENSG00000161021	MAML1	0	0	0	0.636011	0	0	0	0	0
TCONS_00333145	ENSG00000112685	EXOC2	0.00117	0.000252	0.023854	0.136787	0.000252	0.019399	0	0.019399	0
TCONS_00333185	ENSG00000112699	GMDS	0	0	0.048727	0.154508	0.031298	0	0	0	0.006282
TCONS_00323196	XLOC_127652	XLOC_127652	0	0	0	0.023238	0	0	0	0	0.015663
TCONS_00334226	ENSG00000124788	ATXN1	0	0.008114	0.007679	0.141058	0	0	0	0	0.002461
TCONS_00324033	XLOC_128154	XLOC_128154	0	0	0	0.057006	0	0	0	0	0
TCONS_00335472	ENSG00000137337	MDC1	0.013646	0	0	0.161169	0	0.080686	0	0.080686	0
TCONS_00335660	XLOC_133925	XLOC_133925	0	0	0.031423	0.053317	0	0.009402	0	0.009402	0
TCONS_00325899	ENSG00000112033	PPARD	0	0	0.071823	0.087599	0	0.007433	0.000791	0.007433	0.008208
TCONS_00325911	ENSG00000112033	PPARD	0	0	0	0.074036	0	0	0	0	0
TCONS_00338945	XLOC_135351	XLOC_135351	0.007218	0	0	0.082391	0	0	0.018664	0	0.019631
TCONS_00328545	XLOC_130185	XLOC_130185	0	0	0	0.080732	0	0	0	0	0
TCONS_00328797	XLOC_130349	XLOC_130349	0.030127	0	0	0.117099	0	0	0	0	0
TCONS_00329635	XLOC_130836	XLOC_130836	0.009732	0	0.014791	0.075337	0	0	0.013888	0	0.020859
TCONS_00329683	ENSG00000183137	CEP57L1	0	0.002205	0.002463	0.063398	0.001377	0.000329	0.002498	0.000329	0.003841
TCONS_00340665	ENSG00000196591	HDAC2	0.024287	0	0	0.039622	0	0	0	0	0
TCONS_00330296	ENSG00000164465	DCBLD1	0	0	0	0.10411	0	0	0	0	0
TCONS_00331484	XLOC_131827	XLOC_131827	0	0.004737	0	0.011135	0	0	0	0	0
TCONS_00342311	XLOC_136999	XLOC_136999	0.023059	0.006318	0.008275	0.177551	0	0.00352	0.018978	0.00352	0.010868
TCONS_00342317	XLOC_136999	XLOC_136999	0	0	0	0.09599	0	0.061701	0	0.061701	0
TCONS_00331585	ENSG00000146416	AIG1	0.055435	0.132123	0.003843	7.56888	0.00683	0.093432	0.06709	0.093432	0.090695
TCONS_00332290	ENSG00000146426	TIAM2	0.005732	0.002278	0	0.13335	0.00876	0.005145	0.00061	0.005145	0.003478
TCONS_00343584	ENSG00000184465	WDR27	0	0	0	0.127541	0	0	0	0	0
TCONS_00344141	ENSG00000146555	SDK1	0	0	0.128597	0.304775	0	0	0	0	0
TCONS_00354452	ENSG00000106346	USP42	0	0	0.023394	0.068864	0	0	0.012745	0	0
TCONS_00356224	XLOC_142826	XLOC_142826	0	0.02267	0	0.154542	0	0	0	0	0.019481
TCONS_00346188	ENSG00000175600	SUGCT	0	0	0	0.000897	0	0	0	0	0
TCONS_00346285	ENSG00000002746	HECW1	0	0.037056	0	0.041593	0	0	0	0	0
TCONS_00346681	XLOC_138845	XLOC_138845	0	0.023108	0	0.042213	0	0	0	0	0
TCONS_00346742	XLOC_138896	XLOC_138896	0	0	0.035542	0.09714	0	0	0.025713	0	0.012138
TCONS_00358317	ENSG00000127946	HIP1	0	0	0	0.064118	0	0	0	0	0.001935
TCONS_00359824	ENSG00000239521	CASTOR3	0	0	0	0.071552	0	0	0	0	0
TCONS_00360506	ENSG00000135250	SRPK2	0.000582	0	0.000932	0.088396	0	0	0	0	0.001857
TCONS_00361948	XLOC_145036	XLOC_145036	0	0	0	0.066589	0	0	0	0	0
TCONS_00362089	ENSG00000080802	CNOT4	0	0	0	0.146331	0	0.031924	0	0.031924	0
TCONS_00363416	XLOC_145661	XLOC_145661	0	0	0	0.058197	0	0	0	0	0
TCONS_00372616	ENSG00000198791	CNOT7	0	0	0	0.038331	0	0	0	0	0
TCONS_00365088	ENSG00000284956	AC107959.5	0	0.0088	0.005855	0.080235	0.007637	0.042219	0.009437	0.042219	0
TCONS_00365138	ENSG00000134013	LOXL2	0	0	0.084337	0.371635	0	0	0	0	0
TCONS_00374549	ENSG00000164808	SPIDR	0	0.013142	0.018684	0.027419	0	0	0	0	0
TCONS_00374592	ENSG00000169139	UBE2V2	0	0	0	0.105657	0	0.02128	0.033661	0.02128	0.035892
TCONS_00367132	ENSG00000169122	FAM110B	0	0	0	0.087603	0	0.003253	0	0.003253	0
TCONS_00377910	XLOC_152327	XLOC_152327	0.025477	0	0	0.171706	0	0	0.045203	0	0
TCONS_00370227	XLOC_148802	XLOC_148802	0	0	0	0.08706	0	0.005766	0	0.005766	0
TCONS_00379076	ENSG00000153310	FAM49B	0.005237	0.003093	0.004021	0.330495	0.001359	0	0	0	0.013515
TCONS_00379429	ENSG00000131773	KHDRBS3	0	0	0	0.094858	0	0	0	0	0
TCONS_00389061	ENSG00000107104	KANK1	0	0	0	0.071109	0	0	0	0	0
TCONS_00389581	XLOC_157540	XLOC_157540	0	0.02492	0	0.060187	0	0	0.021517	0	0.020642
TCONS_00381866	XLOC_154079	XLOC_154079	0	0	0.029824	0.069723	0	0	0	0	0
TCONS_00382040	ENSG00000120162	MOB3B	0	0	0	0.068932	0	0	0	0	0
TCONS_00390368	XLOC_157937	XLOC_157937	0	0.012403	0.000967	0.036898	0.014426	0	0.000817	0	0
TCONS_00382143	XLOC_154292	XLOC_154292	0	0	0	0.043952	0	0	0	0	0
TCONS_00382655	ENSG00000159899	NPR2	0	0	0.030015	0.095959	0	0	0	0	0
TCONS_00383821	ENSG00000187210	GCNT1	0	0	0	0.039223	0	0.00061	0	0.00061	0.026122
TCONS_00404488	XLOC_164819	XLOC_164819	0	0	0	0.060407	0	0.000782	0	0.000782	0
TCONS_00399194	XLOC_162228	XLOC_162228	0	0	0	0.038455	0	0	0	0	0
TCONS_00399227	ENSG00000147050	KDM6A	0.000546	0	0	0.193326	0	0.004063	0	0.004063	0
TCONS_00000731	XLOC_000544	XLOC_000544	0	0	0	0.060324	0.039801	0	0	0	0
TCONS_00002263	XLOC_001166	XLOC_001166	0	0	0	0.060663	0	0	0	0	0
TCONS_00022898	XLOC_009288	XLOC_009288	0	0	0	0.104348	0	0	0	0	0.021006
TCONS_00022928	XLOC_009302	XLOC_009302	0	0	0.009466	0.067109	0	0	0.070553	0	0
TCONS_00004799	XLOC_002158	XLOC_002158	0	0	0	0.176312	0	0	0	0	0
TCONS_00013099	ENSG00000143365	RORC	0	0	0	0.074739	0	0	0	0	0
TCONS_00018047	XLOC_007311	XLOC_007311	0	0	0	0.097222	0	0.013314	0	0.013314	0
TCONS_00038114	XLOC_015545	XLOC_015545	0	0	0	0.070641	0	0	0	0	0
TCONS_00047209	XLOC_019717	XLOC_019717	0	0	0	0.067876	0	0	0	0	0
TCONS_00044164	XLOC_018390	XLOC_018390	0	0	0	0.065273	0	0	0	0	0
TCONS_00069040	XLOC_028375	XLOC_028375	0.007199	0	0	0.068115	0	0	0	0	0
TCONS_00075895	XLOC_031062	XLOC_031062	0	0	0	0.066076	0	0	0	0	0.018548
TCONS_00081092	XLOC_032985	XLOC_032985	0	0	0	0.101296	0	0	0	0	0
TCONS_00082076	XLOC_033356	XLOC_033356	0	0	0	0.078952	0	0	0	0	0
TCONS_00095908	XLOC_038484	XLOC_038484	0	0	0	0.092748	0	0	0	0	0.02155
TCONS_00102644	XLOC_041349	XLOC_041349	0	0	0	0.064879	0	0	0	0	0
TCONS_00119566	XLOC_048648	XLOC_048648	0	0	0	0.017848	0	0	0	0	0
TCONS_00123063	XLOC_050209	XLOC_050209	0	0	0	0.059037	0	0	0	0	0
TCONS_00147262	XLOC_057966	XLOC_057966	0	0	0	0.079416	0	0	0	0	0.004283
TCONS_00168784	XLOC_064753	XLOC_064753	0.007668	0	0	0.088825	0	0.020717	0	0.020717	0
TCONS_00158863	XLOC_061702	XLOC_061702	0.017622	0	0	0.076423	0	0	0	0	0
TCONS_00174711	XLOC_066644	XLOC_066644	0	0	0	0.087652	0	0	0	0	0
TCONS_00179293	XLOC_068726	XLOC_068726	0	0.021816	0	0.067214	0	0	0	0	0
TCONS_00176105	XLOC_067235	XLOC_067235	0	0	0	0.09023	0	0.031164	0.03846	0.031164	0
TCONS_00203860	XLOC_076195	XLOC_076195	0	0	0	0.015837	0	0	0	0	0
TCONS_00220017	XLOC_082977	XLOC_082977	0	0	0	0.091266	0	0	0	0	0
TCONS_00220250	XLOC_083118	XLOC_083118	0	0	0.045077	0.068906	0	0	0	0	0
TCONS_00220836	XLOC_083404	XLOC_083404	0	0	0	0.066589	0	0	0.021796	0	0
TCONS_00221206	XLOC_083503	XLOC_083503	0	0	0	0.060718	0	0	0	0	0
TCONS_00223442	XLOC_084489	XLOC_084489	0	0	0	0.087772	0	0.04042	0	0.04042	0.005935
TCONS_00224285	XLOC_084701	XLOC_084701	0	0	0	0.094603	0	0	0	0	0
TCONS_00209634	XLOC_078775	XLOC_078775	0	0	0	0.059902	0	0	0	0	0
TCONS_00229337	XLOC_087135	XLOC_087135	0	0	0	0.071077	0	0	0	0	0
TCONS_00231155	XLOC_087897	XLOC_087897	0	0	0	0.016016	0	0	0	0	0
TCONS_00217470	ENSG00000135903	PAX3	0	0	0	0.090565	0	0	0	0	0
TCONS_00233198	XLOC_088694	XLOC_088694	0	0	0	0.063913	0	0	0	0	0
TCONS_00243489	XLOC_093221	XLOC_093221	0	0	0	0.088352	0	0	0	0	0
TCONS_00244563	ENSG00000185272	RBM11	0	0	0	0.017276	0	0	0	0	0
TCONS_00248879	XLOC_095600	XLOC_095600	0	0	0	0.146602	0	0	0	0	0
TCONS_00252114	ENSG00000205856	C22orf42	0	0	0	0.090611	0	0	0.070917	0	0
TCONS_00252332	XLOC_096968	XLOC_096968	0	0	0	0.071974	0	0	0	0	0
TCONS_00271565	XLOC_104256	XLOC_104256	0	0	0	0.059902	0	0	0	0	0
TCONS_00271687	XLOC_104305	XLOC_104305	0	0	0	0.064781	0	0	0	0	0
TCONS_00275124	XLOC_105420	XLOC_105420	0	0	0	0.092068	0	0	0	0	0
TCONS_00263577	XLOC_100800	XLOC_100800	0	0	0	0.08285	0	0	0	0	0
TCONS_00276104	XLOC_105794	XLOC_105794	0.014869	0	0	0.064014	0	0.027299	0	0.027299	0
TCONS_00276439	XLOC_106023	XLOC_106023	0	0	0	0.094188	0	0	0	0	0
TCONS_00264071	XLOC_101108	XLOC_101108	0	0	0	0.06386	0	0	0	0	0
TCONS_00267324	XLOC_102527	XLOC_102527	0	0	0	0.06439	0	0	0	0	0
TCONS_00267471	XLOC_102652	XLOC_102652	0.027286	0.02249	0	0.100821	0	0	0	0	0
TCONS_00268489	XLOC_103133	XLOC_103133	0	0	0	0.061608	0	0	0	0	0
TCONS_00268690	ENSG00000114248	LRRC31	0	0	0	0.062518	0	0	0	0	0
TCONS_00285282	XLOC_109847	XLOC_109847	0	0.039246	0	0.061444	0	0	0	0	0
TCONS_00286703	XLOC_110578	XLOC_110578	0	0	0.025444	0.083968	0	0	0	0	0
TCONS_00288744	XLOC_111395	XLOC_111395	0	0	0	0.043192	0	0	0	0	0.008702
TCONS_00297668	XLOC_115653	XLOC_115653	0	0	0	0.100821	0	0	0.026617	0	0.054629
TCONS_00297878	XLOC_115751	XLOC_115751	0	0	0	0.063408	0	0	0	0	0
TCONS_00291230	XLOC_112649	XLOC_112649	0	0	0	0.159783	0	0	0	0	0
TCONS_00291247	XLOC_112660	XLOC_112660	0	0	0	0.062038	0	0	0	0	0
TCONS_00300505	XLOC_117038	XLOC_117038	0	0	0	0.085899	0	0	0	0	0
TCONS_00300878	XLOC_117212	XLOC_117212	0	0.03439	0	0.079776	0	0	0	0	0
TCONS_00313507	XLOC_123107	XLOC_123107	0	0	0	0.099697	0	0	0	0	0.02007
TCONS_00304224	XLOC_118929	XLOC_118929	0	0	0	0.078776	0	0	0	0	0.015275
TCONS_00316755	XLOC_124726	XLOC_124726	0	0	0	0.062246	0	0	0	0	0
TCONS_00319304	XLOC_125987	XLOC_125987	0	0	0	0.151095	0	0	0	0	0
TCONS_00309981	XLOC_121475	XLOC_121475	0	0	0.003947	0.079871	0	0	0.026609	0	0
TCONS_00333811	XLOC_132962	XLOC_132962	0	0	0	0.094188	0	0	0	0	0
TCONS_00338018	XLOC_134783	XLOC_134783	0	0	0	0.117437	0	0	0	0	0
TCONS_00330403	XLOC_131248	XLOC_131248	0	0	0	0.075692	0	0	0	0	0
TCONS_00331388	XLOC_131768	XLOC_131768	0	0	0	0.090388	0	0	0	0	0
TCONS_00344754	XLOC_138039	XLOC_138039	0	0	0	0.063913	0	0	0	0	0
TCONS_00355178	XLOC_142323	XLOC_142323	0	0	0	0.069162	0	0	0	0	0
TCONS_00346611	XLOC_138809	XLOC_138809	0	0	0	0.091773	0	0	0	0	0
TCONS_00347154	XLOC_139140	XLOC_139140	0	0	0	0.066342	0	0	0	0	0.026037
TCONS_00363422	XLOC_145666	XLOC_145666	0	0	0	0.066023	0	0.020337	0	0.020337	0.008823
TCONS_00373762	XLOC_150246	XLOC_150246	0	0.037104	0	0.080977	0	0	0	0	0
TCONS_00370725	XLOC_149049	XLOC_149049	0	0	0	0.064858	0	0	0	0	0
TCONS_00384099	XLOC_155225	XLOC_155225	0	0	0	0.032686	0	0	0	0	0
TCONS_00392547	XLOC_159192	XLOC_159192	0	0	0	0.062804	0	0	0	0	0
TCONS_00393081	XLOC_159501	XLOC_159501	0	0	0	0.09096	0	0	0	0	0
TCONS_00394986	XLOC_160459	XLOC_160459	0	0	0	0.062518	0	0	0	0	0
TCONS_00404734	XLOC_164940	XLOC_164940	0	0	0	0.062246	0	0	0	0	0
TCONS_00402945	XLOC_164154	XLOC_164154	0	0	0	0.087785	0	0	0	0	0
TCONS_00403499	XLOC_164441	XLOC_164441	0	0	0	0.076885	0	0	0	0	0
TCONS_00410868	XLOC_168222	XLOC_168222	0	0	0	0.085801	0	0	0	0	0.022865
TCONS_00411224	XLOC_168271	XLOC_168271	0	0	0	0.097724	0	0	0.063973	0	0

## Sheet: lncRNA_UV_cluster 5
transcript_id	gene_id	gene_name	C_0	UV_3	UV_6	UV_9	UV_12	UV_24	UV_48	UV_24	UV_96
ENST00000431202	ENSG00000235143	AL445235.1	0	0	0	0	0.010561	0	0	0	0
ENST00000608332	ENSG00000235790	AC114488.2	0	0	0	0	0.020875	0	0	0	0
ENST00000366152	ENSG00000203325	AL445248.1	0	0	0	0	0.00263	0	0	0	0
ENST00000453688	ENSG00000230615	AL139220.2	0	0	0	0	0.005201	0	0	0	0
ENST00000422216	ENSG00000226252	AL135960.1	0	0	0	0	0.002194	0	0	0	0
ENST00000443284	ENSG00000233203	DHCR24-DT	1.7e-05	0.000111	0.000273	2.5e-05	0.013243	0.000219	0	0.000219	0
ENST00000647399	ENSG00000284808	AC099791.3	0	0	0	0	0.002353	0	0	0	0
ENST00000443104	ENSG00000234184	LINC01781	0	0	0	0	0.046826	0	0	0	0
ENST00000427243	ENSG00000224093	AL109613.1	0	0	0	0	0.006757	0	0	0	0
ENST00000425113	ENSG00000232825	AL445433.2	0	0	0	0	0.006841	0	0	0	0
ENST00000463843	ENSG00000239984	RN7SL420P	0	0	0	0	0.005366	0	0	0	0
ENST00000415338	ENSG00000234571	AC239798.2	0	0	0	0	0.004872	0	0.00117	0	0
ENST00000451784	ENSG00000230898	AL596087.2	0	0	0	0	0.012565	0	0	0	0
ENST00000415637	ENSG00000237707	AL031726.1	0	0	0	0	0.041327	0	0	0	0
ENST00000619568	ENSG00000275392	AL445493.3	0	0	0	0	0.008122	0	0	0	0
ENST00000295012	ENSG00000162913	OBSCN-AS1	0	0	0	0	0.040445	0	0	0	0
ENST00000366713	ENSG00000203684	IBA57-DT	0	0	0	0	0.002689	0	0	0	0
ENST00000449782	ENSG00000232934	AL157786.1	0	0	0	0	0.011567	0	0	0	0
ENST00000508004	ENSG00000251661	AC136475.1	0	0	0	0.005647	0.037925	0	0	0	0
ENST00000499765	ENSG00000246308	AC116535.1	0	0	0	0	0.003513	0	0	0	0
ENST00000528119	ENSG00000255117	LINC02546	0	0	0	0	0.022572	0	0	0	0
ENST00000454509	ENSG00000228061	AC131571.1	0	0	0	0	0.00581	0	0	0	0
ENST00000534431	ENSG00000255202	AL049629.1	0	0	0	0	0.034549	0	0	0	0
ENST00000499066	ENSG00000246250	AC087521.2	0	0	0	0	0.012622	0	0.000489	0	0
ENST00000619449	ENSG00000251562	MALAT1	0	0	0	0	0.00105	0	0	0	5.2e-05
ENST00000529036	ENSG00000255038	AP006287.2	0	0	0	0	0.052997	0	0	0	0
ENST00000544959	ENSG00000256403	AP003785.1	0	0	0	0	0.007692	0	0	0	0
ENST00000545216	ENSG00000245552	AP000787.1	0	0	0	0	0.022175	0	0	0	0
ENST00000649808	ENSG00000285734	AC005414.1	0	0	0	0	0.002891	0	0	0	0
ENST00000553174	ENSG00000257346	AC011603.1	0	0	0	0	0.010753	0	0	0	0
ENST00000439236	ENSG00000197301	HMGA2-AS1	0	0	0	0	0.005046	0	0	0	0
ENST00000552046	ENSG00000257183	AC090502.3	0	0	0	0	0.004581	0	0	0	0
ENST00000547679	ENSG00000257548	AC078929.1	0	0	0	0	0.017841	0	0	0	0
ENST00000553177	ENSG00000185847	LINC01405	0	0	0	0	0.009682	0	0	0	0
ENST00000630357	ENSG00000281196	LINC00934	0	0	0	0	0.004026	0	0	0	0
ENST00000544339	ENSG00000256008	AC125616.1	0	0	0	0	0.020086	0	0	0	0
ENST00000643016	ENSG00000284848	LINC02359	0	0	0	0	0.001635	0	0	0	0
ENST00000613430	ENSG00000277011	AC148477.4	0	0	0	0	0.005128	0	0	0	0
ENST00000575689	ENSG00000232977	LINC00327	0	0	0	0	0.009574	0	0	0	0
ENST00000432770	ENSG00000224511	LINC00365	0	0	0	0	0.019218	0	0	0	0
ENST00000444442	ENSG00000233821	ENOX1-AS1	0	0	0	0	0.009139	0	0	0	0
ENST00000629019	ENSG00000233725	LINC00284	0	0	0	0	0.003928	0	0	0	0
ENST00000606351	ENSG00000235903	CPB2-AS1	0	0	0	0	0.050708	0	0	0	0
ENST00000604129	ENSG00000270725	AL356580.1	0	0	0	0	0.019084	0	0	0	0
ENST00000618966	ENSG00000275216	AL161431.1	0.004429	0.004749	0.028843	0.064995	1.73196	0.00868	0.009556	0.00868	0.017305
ENST00000556667	ENSG00000258708	SLC25A21-AS1	0	0	0	0	0.004779	0	0	0	0
ENST00000412224	ENSG00000186615	KTN1-AS1	0.000229	0	0	9e-05	0.086742	0.000449	0.00098	0.000449	0.00025
ENST00000229465	ENSG00000232774	AL355916.1	0.000809	0.00334	0	0.00309	0.068883	0.002966	0.000434	0.002966	0.000377
ENST00000554679	ENSG00000258837	AL133370.1	0	0	0	0	0.02988	0	0	0	0.006709
ENST00000555539	ENSG00000258586	LINC02274	0	0	0	0	0.007857	0	0	0	0
ENST00000554071	ENSG00000259073	FOXN3-AS2	0	0	0	0	0.007236	0	0	0	0
ENST00000557226	ENSG00000258666	AL157871.4	0	0	0	0	0.010487	0	0	0	0
ENST00000553644	ENSG00000258853	AC021979.2	0	0	0	0	0.044726	0	0	0	0
ENST00000565259	ENSG00000260926	AC016134.1	0	0	0	0	0.00658	0	0	0	0
ENST00000619781	ENSG00000278737	AC013553.4	0	0	0	0	0.043849	0	0	0	0
ENST00000560560	ENSG00000259649	AC027808.2	0	0	0	0	0.051325	0	0	0	0
ENST00000619963	ENSG00000275438	AL031008.1	0	0	0	0	0.017051	0	0	0	0
ENST00000580401	ENSG00000266439	RN7SL493P	0	0	0	0	0.028898	0	0	0	0
ENST00000566054	ENSG00000260009	LINC02130	0	0	0	0	0.008446	0	0	0	0
ENST00000564381	ENSG00000261045	LINC02129	0	0	0	0	0.00671	0	0	0	0
ENST00000564739	ENSG00000261369	AC007533.1	0	0	0	0	0.003711	0	0	0	0.000331
ENST00000568134	ENSG00000245768	AC092378.1	0	0.01805	0	0.013011	0.318722	0.018262	0	0.018262	0.008621
ENST00000567261	ENSG00000261320	AC009061.1	0	0	0	0	0.01942	0	0	0	0
ENST00000563521	ENSG00000260162	AC134312.2	0	0	0	0	0.091847	0	0	0	0
ENST00000378340	ENSG00000205015	LINC02138	0	0	0	0	0.02087	0	0	0	0
ENST00000425277	ENSG00000228133	AC099684.1	0	0	0	0	0.010561	0	0	0	0
ENST00000442757	ENSG00000230113	AC138207.1	0	0	0	0	0.016926	0	0	0	0
ENST00000605548	ENSG00000270240	AC015849.1	0	0	0	0	0.005241	0	0	0	0
ENST00000593139	ENSG00000267042	AC100793.2	0.002714	0	0	0	0.045506	0	0	0	0.002171
ENST00000575039	ENSG00000263293	AC068234.2	0	0	0	0	0.003621	0	0	0	0
ENST00000581213	ENSG00000264243	AC018521.3	0	0	0	0	0.022609	0	0	0	0
ENST00000572491	ENSG00000261976	AC091062.1	0	0	0	0	0.037419	0	0	0	0
ENST00000506394	ENSG00000251665	AC005920.3	0	0	0	0	0.024767	0	0	0	0
ENST00000580589	ENSG00000264672	SEPT4-AS1	0	0	0	0	0.011301	0	0	0	0
ENST00000588397	ENSG00000266954	AP001010.1	0	0	0	0	0.008478	0	0	0	0
ENST00000581072	ENSG00000265142	MIR133A1HG	0	0	0	0	0.002183	0	0	0	0
ENST00000578367	ENSG00000263862	LINC01543	0	0	0	0	0.020499	0	0	0	0
ENST00000583138	ENSG00000263393	AC011825.2	0	0	0	0	0.006672	0	0	0	0
ENST00000593577	ENSG00000267313	AC021504.1	0	0	0	0	0.046951	0	0	0	0
ENST00000591331	ENSG00000267677	AC016229.2	0	0	0	0	0.01176	0	0	0	0
ENST00000577806	ENSG00000264247	LINC00909	0	0	0	0	0.133697	0	0	0	0
ENST00000587759	ENSG00000267262	AC011444.2	0	0	0	0	0.016324	0	0	0	0.004638
ENST00000599416	ENSG00000268650	AC005759.1	0	0.001009	0	0	0.075073	0	0	0	0.001296
ENST00000597110	ENSG00000269553	U62631.1	0	0	0	0	0.010918	0	0	0	0
ENST00000599645	ENSG00000268810	AC007193.1	0	0	0	0	0.011103	0	0	0	0
ENST00000600529	ENSG00000268530	AC008403.3	0	0	0	0	0.043995	0	0	0	0
ENST00000436808	ENSG00000233684	LINC01865	0	0	0	0	0.003893	0	0	0	0
ENST00000472619	ENSG00000239300	AC080162.1	0	0	0	0	0.046029	0	0	0	0
ENST00000430429	ENSG00000234378	AC098828.3	0	0	0	0	0.005893	0	0	0	0
ENST00000431557	ENSG00000235072	AC012074.1	0	0	0	0	0.019025	0	0	0	0
ENST00000626582	ENSG00000232973	CYP1B1-AS1	0	0	0	0	0.001797	0	0	0	0
ENST00000626206	ENSG00000238018	AC093110.1	0	0	0	0	0.007466	0	0	0	0
ENST00000598281	ENSG00000235522	AC010978.1	0	0	0	0	7.4e-05	0	0	0	0
ENST00000443205	ENSG00000224568	LINC01886	0	0	0	0	0.00877	0	0	0	0
ENST00000651479	ENSG00000224655	LINC01823	0	0	0	0	0.01417	0	0.003451	0	0
ENST00000453016	ENSG00000226266	AC009961.1	0	0	0	0	0.014986	0	0	0	0
ENST00000429172	ENSG00000239467	AC007405.3	0	0	0	0	0.005348	0	0	0	0
ENST00000412153	ENSG00000229434	AC017048.1	0	0	0	0	0.03031	0	0	0	0
ENST00000457053	ENSG00000236664	AC011998.3	0	0	0	0	0.004721	0	0	0	0
ENST00000595372	ENSG00000226312	CFLAR-AS1	0	0	0	0	1e-06	0	0	0	0
ENST00000415387	ENSG00000273118	AC093865.1	0	0	0	0	0.005993	0	0	0	0
ENST00000429882	ENSG00000227432	AC053503.1	0	0	0	0	0.014342	0	0	0	0
ENST00000416861	ENSG00000227308	AC009502.1	0	0	0	0	0.002356	0	0	0	0
ENST00000431407	ENSG00000226263	ISM1-AS1	0	0	0	0	0.009633	0	0	0	0
ENST00000454626	ENSG00000226648	PLCG1-AS1	0	0	0	0	0.006543	0	0	0	0
ENST00000421257	ENSG00000228340	MIR646HG	0	0	0	0	0.022363	0	0	0	0
ENST00000609947	ENSG00000227456	LINC00310	0	0	0	0	0.026969	0	0	0	0
ENST00000456880	ENSG00000230061	TRPM2-AS	0	0	0	0	0.004487	0	0	0	0
ENST00000417463	ENSG00000234503	AP000550.2	0	0	0	0	0.011918	0	0	0	0
ENST00000412773	ENSG00000234884	AL022329.1	0	0	0	0	0.054205	0	0	0	0
ENST00000650766	ENSG00000178803	ADORA2A-AS1	0	0	0	0	0.001215	0	0	0	0
ENST00000427360	ENSG00000238195	AL021153.1	0	0	0	0	0.014975	0	0	0	0
ENST00000652499	ENSG00000224271	AL117329.1	0	0	0	0	0.00538	0	0	0	0
ENST00000651071	ENSG00000224271	AL117329.1	0	0	0	0	0.001736	0	0	0	0
ENST00000449652	ENSG00000225929	AC000036.1	0	0	0	0	0.004213	0	0	0	0
ENST00000442809	ENSG00000224957	LINC01266	0	0	0	0	0.007689	0	0	0	0
ENST00000436032	ENSG00000228723	SRGAP3-AS2	0	0	0	0	0.031484	0	0	0	0
ENST00000439293	ENSG00000223797	ENTPD3-AS1	0	0	0	0	0.019823	0	0	0	0
ENST00000449063	ENSG00000235288	AC099329.1	0	0	0	0	0.024534	0	0	0	0
ENST00000431705	ENSG00000224424	PRKAR2A-AS1	0	0	0	2e-06	0.000531	1e-06	1e-06	1e-06	0
ENST00000485347	ENSG00000239991	AC092059.1	0	0	0	0	0.008458	0	0	0	0
ENST00000354642	ENSG00000197099	AC068631.1	0	0	0	0	0.007287	0	0	0	0
ENST00000356133	ENSG00000198491	AC007920.1	0	0	0	0	0.015875	0	0	0	0
ENST00000444729	ENSG00000232353	AC026320.1	0	0	0	0	0.01912	0	0	0	0
ENST00000469345	ENSG00000244314	RN7SL36P	0	0	0	0	0.031752	0	0	0	0
ENST00000631366	ENSG00000242086	MUC20-OT1	0	0	0	0	0.006406	0	0	0	0
ENST00000514802	ENSG00000250190	LINC02364	0	0	0	0	0.012224	0	0	0	0
ENST00000652083	ENSG00000286212	AC097654.1	0	0	0	0	0.007574	0	0	0	0
ENST00000651964	ENSG00000180769	WDFY3-AS2	0	0	0	0	0.057859	0	0	0	0
ENST00000515782	ENSG00000249710	AP001961.1	0	0	0	0	0.001695	0.000141	0	0.000141	0
ENST00000652710	ENSG00000250920	AC105460.1	0	0	0	0	0.00867	0	0	0	0
ENST00000424958	ENSG00000226757	AC079341.1	0	0	0	0	0.004095	0	0	0	0
ENST00000506645	ENSG00000248810	LINC02432	0	0	0	0	0.00605	0	0.001611	0	0
ENST00000513037	ENSG00000250600	ROPN1L-AS1	0	0	0	0	0.075979	0	0	0	0
ENST00000431789	ENSG00000234553	AC022431.1	0	0	0	0	0.010284	0	0	0	0
ENST00000645512	ENSG00000249236	AC008892.1	0	0	0	0	0.023493	0	0	0	0
ENST00000438553	ENSG00000235635	AC016644.1	0	0	0	0	0.003579	0	0	0	0
ENST00000510964	ENSG00000251391	AC113378.1	0	0	0	0	0.02073	0	0	0	0
ENST00000479830	ENSG00000250237	AC010273.2	0	0	0	0	0.021061	0	0	0	0
ENST00000513591	ENSG00000250802	ZBED3-AS1	0	0	0	0	0.004749	0	0	0	0
ENST00000644426	ENSG00000250802	ZBED3-AS1	0	0	0	0	6.5e-05	0	0	0	0
ENST00000509506	ENSG00000249100	AC008885.2	0	0	0	0	0.004959	0	0	0	0
ENST00000648439	ENSG00000248323	LUCAT1	0	0	0	0	0.003697	0	0	0	0
ENST00000504967	ENSG00000247121	AC009126.1	0	0	0	0	0.012706	0	0	0	0
ENST00000503242	ENSG00000250095	NREP-AS1	0	0	0	0	0.008155	0	0	0	0
ENST00000502205	ENSG00000246422	AC008781.2	0	0	0	0	0.007439	0	0	0	0
ENST00000519898	ENSG00000249669	CARMN	0	0	0	0	0.002877	0	0	0	0
ENST00000519976	ENSG00000253445	AC027309.1	0	0	0	0	0.017368	0	0	0	0
ENST00000508187	ENSG00000250909	AC138956.1	0	0	0	0	0.008268	0	0	0	0
ENST00000651914	ENSG00000234763	AL359378.1	0	0	0	0	0.013081	0	0	0	0
ENST00000607275	ENSG00000230314	ELOVL2-AS1	0	0	0	0	0.017431	0	0	0	0
ENST00000606627	ENSG00000215022	AL008729.1	0	1.7e-05	0	0	0.012625	0	0	0	0
ENST00000426185	ENSG00000228789	HCG22	0	0	0	0	0.01393	0	0	0	0.002376
ENST00000630806	ENSG00000281756	C2-AS1	0	0	0	0	0.045596	0	0.005166	0	0.002838
ENST00000619776	ENSG00000276746	RF00017	0	0	0	0	0.033689	0	0	0	0
ENST00000455005	ENSG00000231881	AL109615.2	0	0	0	0	0.0195	0	0	0	0
ENST00000508884	ENSG00000249379	AL033397.2	0	0	0	0	0.007365	0	0	0	0
ENST00000607480	ENSG00000271986	RN7SL827P	0	0	0	0	0.001708	0	0	0	0
ENST00000363328	ENSG00000200198	RN7SKP211	0	0	0	0	0.014642	0	0	0	0
ENST00000440001	ENSG00000231889	TRAF3IP2-AS1	0	0	0	0	0.110546	0	0	0	0
ENST00000446887	ENSG00000285492	AL356417.3	0	0	0	0	0.017465	0	0	0	0
ENST00000650230	ENSG00000285726	AL031121.3	0	0	0	0	0.003007	0	0	0	0
ENST00000431017	ENSG00000223942	AL590302.1	0	0	0	0	0.006081	0	0	0	0
ENST00000422230	ENSG00000229043	AC091729.3	0	0	0	0	0.061008	0	0	0	0
ENST00000458648	ENSG00000217455	AC073316.1	0	0	0	0	0.059365	0	0	0	0
ENST00000437354	ENSG00000236708	AC073316.3	0	0	0	0	0.015587	0	0	0	0
ENST00000452249	ENSG00000237773	AC073332.1	0	0	0	0	0.033474	0	0	0	0
ENST00000605136	ENSG00000243766	HOTTIP	0	0	0	0	0.004583	0	0	0	0
ENST00000602610	ENSG00000270182	AC004080.4	0	0	0	0	0.000291	0	0	0	0
ENST00000381493	ENSG00000205745	AC083864.1	0	0	0	0	0.006018	0	0	0	0
ENST00000450544	ENSG00000226581	AC092634.3	0	0	0	0	0.025022	0	0	0	0
ENST00000447430	ENSG00000233559	LINC00513	0	0	0	0.000778	0.008427	0	0	0	0
ENST00000470435	ENSG00000244479	OR2A1-AS1	0	0	0	0	0.003076	0	0	0	0
ENST00000522026	ENSG00000253695	AC011008.1	0	0	0	0	0.025447	0	0	0	0
ENST00000521055	ENSG00000253184	AC011586.1	0	0	0	0	0.01528	0	0	0	0
ENST00000526470	ENSG00000228862	AC068389.1	0	0	0	0	0.002588	0	0	0	0
ENST00000521441	ENSG00000254377	MIR124-2HG	0	0	0	0	0.003248	0	0	0	0
ENST00000523678	ENSG00000254202	AC015522.1	0	0	0	0	0.007975	0	0	0	0
ENST00000523121	ENSG00000253679	AP001330.2	0	0	0	0	0.018845	0	0	0	0
ENST00000499522	ENSG00000247081	BAALC-AS1	0	0	0	0	0.00506	0	0	0	0
ENST00000520037	ENSG00000253754	AC087620.1	0	0	0	0	0.005228	0	0	0	0
ENST00000647190	ENSG00000253438	PCAT1	0	0	0	0	0.004812	0	0	0	0.001171
ENST00000517915	ENSG00000253438	PCAT1	0	0	0	0.01163	0.051541	0	0	0	0
ENST00000521122	ENSG00000249859	PVT1	0.0001	9.5e-05	0	0	0.018185	0	0.000191	0	0
ENST00000518674	ENSG00000254372	AC040914.1	0	0	0	0	0.008742	0	0	0	0
ENST00000415172	ENSG00000232998	VPS13A-AS1	0	0	0	0	0.019529	0	0	0	0
ENST00000544644	ENSG00000228189	AL592486.1	0	0	0	0	0.007331	0	0	0	0
ENST00000647389	ENSG00000231806	PCAT7	0	0	0	0	0.004493	0	0	0	0
ENST00000623792	ENSG00000279141	AL590226.2	0	0	0	0	0.030775	0	0	0	0
ENST00000444482	ENSG00000228906	AL353804.1	0	0	0	0	0.189046	0	0	0	0
ENST00000648200	ENSG00000203930	LINC00632	0	3e-06	0	0	0.005193	0	0	0	0
ENST00000433624	ENSG00000224533	TMLHE-AS1	0	0	0	0	0.001124	0	0	0	0
ENST00000651286	ENSG00000176728	TTTY14	0	0	0	0	0.020309	0	0	0	0
ENST00000324446	ENSG00000176728	TTTY14	0	0	0	0	0.00617	0	0	0	0
TCONS_00003008	XLOC_001410	XLOC_001410	0	0	0	0	0.095424	0	0	0	0
TCONS_00023109	ENSG00000158828	PINK1	0	0	0	0	0.084321	0	0.013174	0	0
TCONS_00024397	XLOC_009865	XLOC_009865	0	0	0	0	0.067262	0	0	0	0
TCONS_00024955	ENSG00000146463	ZMYM4	0.002116	0	0	0	0.054378	0	0	0	0
TCONS_00025026	ENSG00000126070	AGO3	0	0	0	0	0.074185	0.00098	0.005318	0.00098	0
TCONS_00008087	ENSG00000185483	ROR1	0	0	0	0	0.11752	0.001757	0.002643	0.001757	0.002235
TCONS_00028078	XLOC_011264	XLOC_011264	0	0	0	0	0.037077	0	0	0	0
TCONS_00009217	XLOC_003742	XLOC_003742	0	0	0	0	0.059487	0	0	0	0
TCONS_00031817	XLOC_012854	XLOC_012854	0	0	0	0	0.081634	0	0	0	0
TCONS_00012920	ENSG00000143458	GABPB2	0.000329	0.010388	0	0.000299	0.481617	0.005697	0.003023	0.005697	0.026832
TCONS_00031921	ENSG00000197622	CDC42SE1	0	0	0	0	0.030189	0	0	0	0
TCONS_00014389	ENSG00000162738	VANGL2	0	0	0	0	0.101181	0.002027	0	0.002027	0
TCONS_00014853	XLOC_005885	XLOC_005885	0	0	0	0	0.080215	0	0	0	0
TCONS_00017096	XLOC_006923	XLOC_006923	0	0	0	0	0.069627	0	0	0	0
TCONS_00037184	ENSG00000116141	MARK1	0	0	0	0	0.101006	0	0.001934	0	0
TCONS_00039836	XLOC_016415	XLOC_016415	0	0	0	0	0.094798	0	0	0	0.004477
TCONS_00042199	XLOC_017488	XLOC_017488	0	0	0	0	0.020224	0	0	0	0
TCONS_00042657	ENSG00000138336	TET1	0.044324	0	0.131606	0.085144	6.66029	0.109384	0.035777	0.109384	0
TCONS_00044018	XLOC_018312	XLOC_018312	0	0	0	0	5e-05	0	0	0	0
TCONS_00052592	ENSG00000285932	AL133353.2	0	0	0	0	0.09986	0.008699	0.001937	0.008699	0
TCONS_00054558	XLOC_023129	XLOC_023129	0	0	0	0	0.149387	0	0	0	0
TCONS_00047180	XLOC_019701	XLOC_019701	0	0	0	0	0.118423	0	0	0	0
TCONS_00056617	ENSG00000133794	ARNTL	0	0	0	0.008453	0.218598	0.012225	0	0.012225	0
TCONS_00059113	XLOC_024881	XLOC_024881	0.005539	0	0	0	0.112246	0	7.4e-05	0	0
TCONS_00075569	XLOC_030905	XLOC_030905	0	0	0	0	0.08104	0	0	0	0
TCONS_00077022	XLOC_031450	XLOC_031450	0	0	0	0	0.111758	0	0	0	0
TCONS_00065957	XLOC_027209	XLOC_027209	0	0	0	0	0.133993	0.014347	0	0.014347	0
TCONS_00093078	ENSG00000196876	SCN8A	0	0	0	0	0.102125	0	0	0	0
TCONS_00082224	ENSG00000284791	SMIM41	0.000497	0.000406	0.000402	0	0.090264	0.000323	0.000755	0.000323	0
TCONS_00093543	ENSG00000123415	SMUG1	0	0	0	0	0.051424	0	0	0	0
TCONS_00088332	XLOC_035641	XLOC_035641	0	0	0	0	0.08688	0	0	0	0
TCONS_00099983	ENSG00000102678	FGF9	0	0	0	0	0.017989	0	0	0	0
TCONS_00101394	ENSG00000102445	RUBCNL	0	0	0	0	0.079182	0	0	0	0
TCONS_00111293	XLOC_045521	XLOC_045521	0	0	0	0	0.072763	0	0.000517	0	0
TCONS_00133871	ENSG00000169594	BNC1	0.001261	0.000679	0.000998	0.001546	0.036623	0	0	0	0
TCONS_00134259	XLOC_054175	XLOC_054175	0	0	0	0	0.009493	0	0	0	0
TCONS_00146941	ENSG00000140749	IGSF6	0.005145	0	0.008596	0	2.04885	0	0.002547	0	0
TCONS_00140244	ENSG00000177200	CHD9	0	0	0	0	0.284055	0	0	0	0.000514
TCONS_00158143	ENSG00000186868	MAPT	0	0	0	0	0.012121	0	0	0	0
TCONS_00170864	XLOC_065506	XLOC_065506	0	0	0	0	0.092432	0	0	0	0
TCONS_00162734	ENSG00000141568	FOXK2	0	0	0	0	0.687285	0	0	0	0.003822
TCONS_00162813	ENSG00000175711	B3GNTL1	0	0	0	0	0.088699	0	0	0	0
TCONS_00178000	XLOC_068100	XLOC_068100	0	0	0	0	0.106849	0	0	0	0
TCONS_00174786	XLOC_066684	XLOC_066684	0	0	0	0	0.044118	0	0.005923	0	0
TCONS_00175615	ENSG00000141384	TAF4B	0.002022	0	0	0	0.130832	0.001652	0	0.001652	0.002844
TCONS_00179900	ENSG00000132874	SLC14A2	0	0	0	0	0.078397	0	0	0	0
TCONS_00177497	XLOC_067900	XLOC_067900	0	0	0	0	0.121564	0	0	0	0
TCONS_00198092	ENSG00000121297	TSHZ3	0.009817	0	0	0.01009	0.198659	0	0	0	0
TCONS_00189321	ENSG00000226763	SRRM5	0.029834	0.016751	0.003005	0	0.622593	0.023661	0	0.023661	0.024973
TCONS_00201962	XLOC_075679	XLOC_075679	0	0.00237	0.002445	0	0.726259	0	0	0	0
TCONS_00220491	XLOC_083273	XLOC_083273	0	0	0	0	0.143014	0	0	0	0
TCONS_00220635	ENSG00000119771	KLHL29	0	0	0	0	0.049207	0	0	0	0
TCONS_00206405	XLOC_077293	XLOC_077293	0	0	0	0	0.111972	0	0	0	0
TCONS_00222999	ENSG00000115464	USP34	0	0.00311	0	0	0.114633	0.001589	0	0.001589	0.002402
TCONS_00210450	XLOC_079085	XLOC_079085	0	0	0	0	0.090021	0	0	0	0
TCONS_00212375	ENSG00000152127	MGAT5	0	0	0	0	0.188864	0	0	0	0.001357
TCONS_00228493	XLOC_086680	XLOC_086680	0	0	0	0.00789	0.166845	0	0	0	0.003971
TCONS_00228483	XLOC_086680	XLOC_086680	0	0	0	0	0.054242	0	0	0	0
TCONS_00213397	ENSG00000123636	BAZ2B	0	0	0	0	0.085637	0	0	0	0
TCONS_00231106	XLOC_087869	XLOC_087869	0.001251	0	0	0	0.125506	0	0	0	0
TCONS_00216358	XLOC_081678	XLOC_081678	0	0	0	0	0.069001	0	0	0	0
TCONS_00216480	ENSG00000021826	CPS1	0	0	0	0	0.025054	0	0	0	0
TCONS_00240122	XLOC_091608	XLOC_091608	0	0	0	0	0.115308	0	0	0	0
TCONS_00238721	ENSG00000196227	FAM217B	0	0	0	0	0.535526	0	0	0	0
TCONS_00244522	XLOC_093640	XLOC_093640	0	0	0	0	0.150481	0	0	0	0
TCONS_00246298	ENSG00000160194	NDUFV3	0	0	0	0	0.139537	0.002002	0	0.002002	0
TCONS_00246823	ENSG00000183570	PCBP3	0	0	0	0	0.011918	1.3e-05	0	1.3e-05	0
TCONS_00255641	XLOC_098205	XLOC_098205	0	0	0	0	0.078175	0	0	0	0
TCONS_00252846	XLOC_097166	XLOC_097166	0	0	0	0	0.022336	0	0	0	0
TCONS_00258449	ENSG00000175928	LRRN1	0.008869	0.005014	0.004599	0.005479	1.89998	0.001872	0.002679	0.001872	0.003487
TCONS_00278107	ENSG00000145087	STXBP5L	0.000508	0	0	0	0.157145	0	0	0	0
TCONS_00267038	XLOC_102396	XLOC_102396	0	0	0	0	0.120847	0	0	0	0
TCONS_00281690	ENSG00000284862	CCDC39	0	0	0	0	0.163121	0	0	0	0
TCONS_00283029	ENSG00000119227	PIGZ	0	0	0	0	0.090275	0	0	0	0
TCONS_00286242	XLOC_110301	XLOC_110301	0	0	0	0	0.083302	0	0	0	0
TCONS_00297279	ENSG00000138795	LEF1	0.002458	0.000232	0	0.001777	0.579076	0	0	0	0
TCONS_00314229	ENSG00000164509	IL31RA	0	0	0	0	0.158303	0	0	0	0
TCONS_00305409	XLOC_119452	XLOC_119452	0	0	0	0	0.090794	0	0	0	0.012623
TCONS_00306392	XLOC_119995	XLOC_119995	0	0	0	0	0.068358	0	0	0	0
TCONS_00317724	XLOC_125315	XLOC_125315	0	0	0	0	0.07981	0	0	0	0
TCONS_00307208	XLOC_120416	XLOC_120416	0	0	0	0	0.089438	0	0	0	0.009407
TCONS_00321272	XLOC_126940	XLOC_126940	0	0	0	0	0.079523	0	0	0	0
TCONS_00322529	ENSG00000137274	BPHL	0	0	0	0	0.000564	0	0	0	0
TCONS_00334228	ENSG00000124788	ATXN1	0	0	0	0	0.077753	0	0	0	0
TCONS_00325874	ENSG00000146197	SCUBE3	0	0	0	0	0.169016	0	0	0	0
TCONS_00326182	XLOC_128924	XLOC_128924	0	0	0	0	0.098016	0	0	0	0
TCONS_00338577	XLOC_135054	XLOC_135054	0	0	0	0	0.09309	0.007936	0	0.007936	0
TCONS_00340530	XLOC_136162	XLOC_136162	0	0	0	0	0.084244	0	0	0	0
TCONS_00342316	XLOC_136999	XLOC_136999	0	0	0	0	0.154609	0	0	0	0
TCONS_00355331	ENSG00000070882	OSBPL3	0	0	0	0	0.203149	0	0.006154	0	0
TCONS_00352336	ENSG00000059377	TBXAS1	0	0	0	0	0.204341	0	0	0	0
TCONS_00364594	ENSG00000129422	MTUS1	0.002744	0	0	0	0.182964	0	0	0	0
TCONS_00373475	ENSG00000197892	KIF13B	0	0	0	0	0.138871	0	0.01171	0	0
TCONS_00374801	XLOC_150797	XLOC_150797	0	0	0	0	0.123847	0.01165	0	0.01165	0
TCONS_00367131	ENSG00000169122	FAM110B	0	0	0.007375	0	0.217329	0.004315	0	0.004315	0
TCONS_00376033	XLOC_151444	XLOC_151444	0	0	0	0	0.22007	0	0.000304	0	0
TCONS_00378341	ENSG00000177570	SAMD12	0.002797	0.00022	0.001558	0.000351	0.044185	0.000787	0.003822	0.000787	0.002487
TCONS_00370203	ENSG00000156787	TBC1D31	0	0	0	0	0.654366	0	0	0	0
TCONS_00370305	ENSG00000104537	ANXA13	0.042899	0	0	0	0.192181	0	0	0	0
TCONS_00379143	XLOC_152969	XLOC_152969	0	0	0	0	0.105626	0	0	0	0
TCONS_00389988	ENSG00000198642	KLHL9	0	0	0	0	0.067108	0	0	0	0
TCONS_00381904	XLOC_154117	XLOC_154117	0	0	0	0	0.077194	0	0	0	0
TCONS_00384475	XLOC_155457	XLOC_155457	0.016286	0	0	0	0.103261	0	0	0	0
TCONS_00386061	XLOC_156308	XLOC_156308	0	0	0	0	0.007948	0	0	0	0
TCONS_00395482	XLOC_160666	XLOC_160666	0	0	0	0	0.113632	0	0	0	0
TCONS_00397861	ENSG00000073464	CLCN4	0.004893	0	0	0	0.22505	0	0	0	0
TCONS_00405981	XLOC_165617	XLOC_165617	0	0	0	0	0.08145	0	0	0	0
TCONS_00401370	XLOC_163316	XLOC_163316	0	0	0	0	0.095799	0	0	0	0
TCONS_00401611	XLOC_163494	XLOC_163494	0	0	0	0	0.045422	0	0	0	0
TCONS_00000126	XLOC_000059	XLOC_000059	0	0	0	0	0.104118	0	0	0	0
TCONS_00000305	XLOC_000207	XLOC_000207	0.055791	0.023078	0.043549	0.016329	1.50317	0.028169	0.023663	0.028169	0.025559
ENST00000605725	ENSG00000271200	AC099791.2	0.003508	0.008647	0.004467	0.009611	0.118459	0.005973	0.019851	0.005973	0.030101
ENST00000427819	ENSG00000223653	AL078459.1	0.004041	0	0	0.001835	0.009461	0	0.002403	0	0.005025
ENST00000453011	ENSG00000233184	AC093157.1	0.004836	0	0	0.028789	0.062374	0.003243	0	0.003243	0.005841
ENST00000420597	ENSG00000232527	AC245595.1	0.000173	0.000122	0.000109	0.000132	0.00113	6.1e-05	8.9e-05	6.1e-05	0.000124
ENST00000416221	ENSG00000233461	AL445524.1	0.030629	0.009082	0.509259	0.927545	1.38668	0.023182	0.331445	0.023182	0.473471
ENST00000646955	ENSG00000285177	AL357556.4	0.019803	0.000396	0.005901	0.0137	0.025698	0	0	0	0
ENST00000467429	ENSG00000242818	RN7SL846P	0.028783	0	0	0.024515	0.048545	0	0	0	0
ENST00000504230	ENSG00000251381	LINC00958	0	0.033961	0	0.051253	0.119956	0.035182	0	0.035182	0
ENST00000528466	ENSG00000254602	AP000662.1	0	0	0	0.016381	0.056639	0.009609	0.037191	0.009609	0
ENST00000500113	ENSG00000246174	KCTD21-AS1	0.013411	0.01692	0.00614	0.031933	0.07059	0.008898	0.011057	0.008898	0.005067
ENST00000542086	ENSG00000246695	RASSF8-AS1	0.004892	0.000189	0	0.000569	0.015241	1e-06	0.000348	1e-06	0.001342
ENST00000615731	ENSG00000278475	AC009464.1	0.018928	0	0	0.01104	0.053761	0.008487	0.008859	0.008487	0.026628
ENST00000547866	ENSG00000257913	DDN-AS1	0	0	0.026405	0.024715	0.043592	0	0	0	0.020415
ENST00000542265	ENSG00000255857	PXN-AS1	1e-06	1e-06	0	4e-06	1.8e-05	2e-06	4e-06	2e-06	1e-06
ENST00000648376	ENSG00000285621	AL138999.2	0.010772	0.009234	0.009617	0.019025	0.032289	0.005011	0	0.005011	0.000311
ENST00000422931	ENSG00000228444	AL137244.1	0.018795	0	0	0.008275	0.021329	0	0	0	0
ENST00000620512	ENSG00000274898	AC001226.1	0.001195	0.010249	0.002857	0.007503	0.022819	0.002627	0	0.002627	0.002228
ENST00000613169	ENSG00000278147	AL121809.2	0	0	0	0	0.054104	0	0	0	0
ENST00000556734	ENSG00000258378	AL139021.1	0	0.003976	0	0.003982	0.007257	0	0	0	0
ENST00000485097	ENSG00000239910	RN7SL530P	0.007492	0	0	0	0.041686	0	0	0	0.01499
ENST00000560049	ENSG00000179523	EIF3J-DT	1.35105	0.238758	0.00152	0.236854	2.28152	0.21773	0.074882	0.21773	0.200705
ENST00000558994	ENSG00000259377	AC026770.1	0.019453	0	0.012143	0.031189	0.069936	0	0.001398	0	0.013134
ENST00000527434	ENSG00000231439	WASIR2	0	0	0	0.006792	0.014844	0	0	0	0
ENST00000500612	ENSG00000247324	AC010547.1	0.00041	0.000155	6e-06	0.000379	0.001255	0	0.000228	0	0
ENST00000575727	ENSG00000215067	ALOX12-AS1	0.066719	0	0	0.020477	0.072318	4e-05	5e-06	4e-05	0.022662
ENST00000412403	ENSG00000228768	AC003101.1	0	0.035495	0	0.06008	0.086087	0.032696	0	0.032696	0
ENST00000582518	ENSG00000266013	LINC02079	0	0	0	0.012885	0.042187	0	0	0	0
ENST00000593169	ENSG00000267440	LINC02594	0	0	0	0	0.03001	0	0	0	0
ENST00000398275	ENSG00000214401	KANSL1-AS1	0.387335	0.336753	0.312537	0.689013	2.49339	0.21829	0.126111	0.21829	0.420047
ENST00000620020	ENSG00000275025	AC002401.3	0	0	0	0	0.003704	0	0	0	0
ENST00000637497	ENSG00000283209	AC106858.1	0.018673	0	0	0	0.032971	0	0	0	0.004087
ENST00000566971	ENSG00000260011	AC132938.1	0	0.001046	0	0.067205	0.103281	0	0.079388	0	0
ENST00000591116	ENSG00000226686	LINC01535	9.7e-05	0.003206	0.004664	0.007304	0.029372	0	0.022616	0	0
ENST00000532473	ENSG00000254760	AC008750.1	0.007794	0	0	0	0.026231	0	0	0	0.011528
ENST00000591665	ENSG00000267577	AC010327.3	0.053741	0.028441	0.357585	0.699424	0.871196	0.038417	0.086906	0.038417	0.094692
ENST00000432314	ENSG00000231532	LINC01249	0	0	0	0.009607	0.014712	0	0	0	0
ENST00000426892	ENSG00000226087	AC073283.2	0	0	0	0.000778	0.029833	0.004227	0.003234	0.004227	0.004823
ENST00000431020	ENSG00000230923	LINC00309	0	0	0.002794	0.002165	0.008368	0	0.002834	0	0.002179
ENST00000428541	ENSG00000222043	AC079305.1	0	0.016416	0	0.013967	0.065419	0	0	0	0
ENST00000605907	ENSG00000229056	HECW2-AS1	0.012051	0.017067	0.005953	0.025524	0.065336	0.012423	0.00529	0.012423	0.010415
ENST00000457694	ENSG00000235042	AC098820.2	0.01255	0	0	0.044566	0.108034	0.026897	0.015597	0.026897	0
ENST00000624627	ENSG00000274333	CU633967.1	0	0	0	0.273819	0.232602	0.008911	0	0.008911	0
ENST00000449746	ENSG00000236471	AF127577.5	0	0.021172	0	0.011843	0.042994	0	0	0	0
ENST00000608431	ENSG00000237945	LINC00649	0	0.080849	0	0.142688	0.158178	0	0	0	0
ENST00000535199	ENSG00000230212	AP000688.1	0.014955	0.011787	0	0.03363	0.110935	0.013964	0.008545	0.013964	0.002718
ENST00000451618	ENSG00000224413	AP001476.1	0.003585	0.003679	0	0.006513	0.02082	0.002458	0.004264	0.002458	0.003278
ENST00000610170	ENSG00000273082	Z73429.1	0.022839	0.037324	0	0.058649	0.083156	0	0.010006	0	0
ENST00000450216	ENSG00000235209	AL022318.1	0.050902	0	0.027259	0.02419	0.095641	0.01094	0.013823	0.01094	0.007327
ENST00000651403	ENSG00000224271	AL117329.1	0	0	0	0.001113	0.003935	0	0	0	0
ENST00000621000	ENSG00000206567	AC022007.1	0.013321	0	0.000175	0	0.038962	0	0.007319	0	0.003263
ENST00000447975	ENSG00000230266	XXYLT1-AS2	0	0.023804	0	0.0165	0.040732	0	0	0	0.020136
ENST00000470264	ENSG00000243339	RN7SL738P	0	0	0.020431	0.022415	0.062119	0	0	0	0.024259
ENST00000502636	ENSG00000250623	AL136360.2	0.008952	0	0	0	0.028843	0	0	0	0
ENST00000503893	ENSG00000251075	HTT-AS	0	0	0.007286	0.023473	0.037448	0	0.009494	0	0
ENST00000482763	ENSG00000240966	RN7SL681P	0.027524	0	0.015823	0.012257	0.0278	0	0	0	0
ENST00000356499	ENSG00000214559	AC019077.1	0.079664	0.090109	0.2709	0.410295	0.669908	0.166655	0.035399	0.166655	0.002722
ENST00000610012	ENSG00000272784	AC019193.2	0.012428	0	0	0.006699	0.0582	0.009047	0	0.009047	0
ENST00000520280	ENSG00000254233	LINC02365	0	0.015321	0.011066	0.021347	0.030394	0	0	0	0
ENST00000602982	ENSG00000269961	AC010359.1	0.037103	0.017073	0.009606	0.262446	0.246522	0.018986	0.033071	0.018986	0.014562
ENST00000517474	ENSG00000253852	AC011383.1	0	0	0	0.011602	0.014951	0	0	0	0
ENST00000456189	ENSG00000224846	AL133351.1	0	0	0	0	0.057218	0	0	0	0
ENST00000607565	ENSG00000272320	AL445309.1	0	0	0	0.003599	0.004638	0	0	0	0
ENST00000500636	ENSG00000247925	AL139807.1	0	0.006627	0	0.010168	0.013016	0	0	0	0
ENST00000411895	ENSG00000229276	REV3L-IT1	0	0	0.006531	0.010354	0.038355	0.005307	0.001799	0.005307	0.001629
ENST00000455011	ENSG00000234147	AL035446.1	0.060007	0.008701	0.011495	0.249825	0.604531	0.076632	0.027101	0.076632	0.00273
ENST00000627375	ENSG00000235652	AL356599.1	0	0	0	0	0.003392	0.000413	0	0.000413	0.000952
ENST00000642829	ENSG00000285492	AL356417.3	0	0	0	0.001127	0.004855	0	0	0	0
ENST00000437615	ENSG00000229214	LINC00242	0.006517	0.007744	0.007643	0.029486	0.064512	0.030531	0.015478	0.030531	0.011879
ENST00000484550	ENSG00000240859	AC093627.4	0.001573	0	0	0.002859	0.004587	0	0	0	0
ENST00000415246	ENSG00000237773	AC073332.1	0	0.010632	0	0.02691	0.077145	0.000102	0.006701	0.000102	0.01623
ENST00000569710	ENSG00000259826	AC072061.1	0.004281	0.010717	0.015959	0.016853	0.061948	0.005657	0.004035	0.005657	0.002897
ENST00000609979	ENSG00000241764	AC002467.1	0.005619	0.155655	0.024652	0.326793	0.687477	0.149833	0.222225	0.149833	0.017554
ENST00000528139	ENSG00000255366	AC120036.4	0	0	0	0.008621	0.007406	0	0	0	0
ENST00000517670	ENSG00000254027	AC009902.2	0.002604	0	0.009339	0.00988	0.021707	0.011004	0.000164	0.011004	0
ENST00000519854	ENSG00000251136	AF117829.1	0	0	0	0	0.024285	0	0.00792	0	0
ENST00000439872	ENSG00000224764	AL353768.1	0.014709	0	0	0.004263	0.056825	0	0.009622	0	0
ENST00000623196	ENSG00000180539	C9orf139	0	0	0.001852	0.00251	0.004889	0	0	0	0.001205
ENST00000649535	ENSG00000203930	LINC00632	0.008554	0	0	0	0.034671	0	0.001128	0	0.013136
TCONS_00001706	ENSG00000116151	MORN1	0.027225	0.012064	0.013577	0.01595	0.166301	0.036483	0.028108	0.036483	0.023473
TCONS_00024187	ENSG00000158161	EYA3	0.031514	0	0	0.151261	0.194646	0.015404	0.00547	0.015404	0.009332
TCONS_00007192	ENSG00000186564	FOXD2	0.018905	0	0.060028	0.049522	0.131615	0.014221	0	0.014221	0.028634
TCONS_00008177	ENSG00000184588	PDE4B	0	0	0	0.004903	0.024178	0	0	0	0.007386
TCONS_00037826	ENSG00000181873	IBA57	0	0	0	0.119728	0.439644	0.072494	0.144562	0.072494	0
TCONS_00019682	ENSG00000183780	SLC35F3	0.000201	0.003398	0.09604	0.153449	0.158944	0	0	0	0.001492
TCONS_00039987	ENSG00000183049	CAMK1D	0	0.003567	0.009449	0.041089	0.042862	0.001293	0	0.001293	0
TCONS_00048747	ENSG00000197321	SVIL	0.025859	0	0	0	0.072529	0	0	0	0.001781
TCONS_00043917	XLOC_018276	XLOC_018276	0	0.016092	0.029305	0.097335	0.127693	0.038432	0	0.038432	0.016345
TCONS_00044167	ENSG00000119922	IFIT2	0.02141	0	0.122391	0.126766	0.332635	0	0.167271	0	0.010194
TCONS_00053837	ENSG00000107518	ATRNL1	0	0.008894	0	0.025754	0.079936	0.011027	0.022414	0.011027	0
TCONS_00046903	ENSG00000132334	PTPRE	0.004238	0.013656	0.03385	0.058945	0.121277	0.013441	0.02655	0.013441	0.045918
TCONS_00066910	XLOC_027509	XLOC_027509	0.028373	0.028539	0.012504	0.087113	0.227184	0.061544	0.039275	0.061544	0.096515
TCONS_00068042	ENSG00000133816	MICAL2	0	0	0	0.100145	0.157196	0	0	0	0
TCONS_00058174	ENSG00000052850	ALX4	1.25782	0.671247	0	0.819375	2.25065	0	0	0	0
TCONS_00058411	ENSG00000175224	ATG13	0.000561	0	0.011286	0.028297	0.105874	0.008798	0	0.008798	0
TCONS_00073654	ENSG00000054965	FAM168A	0.067911	0.088775	0.031415	0.148593	0.331069	0.165341	0.088741	0.165341	0.034352
TCONS_00077631	ENSG00000174370	C11orf45	0.164197	0	0	0.074965	0.386908	0.092968	0.185576	0.092968	0.090988
TCONS_00079147	ENSG00000166532	RIMKLB	0.025695	8e-06	3e-06	0	0.073534	1e-06	6e-06	1e-06	0
TCONS_00099663	ENSG00000072609	CHFR	0.093487	0.019218	0.051633	0.154924	0.389224	0.019529	0.071822	0.019529	0.033614
TCONS_00104201	XLOC_042099	XLOC_042099	0	0	0	0.039152	0.091361	0.000668	0	0.000668	0
TCONS_00107940	XLOC_044149	XLOC_044149	0.010458	0.04379	0	0.074018	0.120807	0.013412	0	0.013412	0.035305
TCONS_00108916	ENSG00000179933	C14orf119	0	0	0	0.085478	0.108883	0.072329	0	0.072329	0
TCONS_00114279	ENSG00000140153	WDR20	0.119346	0.006427	0	0	0.425093	0	0.090423	0	0
TCONS_00133376	ENSG00000080644	CHRNA3	0.028685	0	0.006278	0.007321	0.127483	0.001166	0	0.001166	0
TCONS_00139519	ENSG00000167395	ZNF646	0.042535	0.021359	0.020874	0.08732	0.158814	0.01406	0.039841	0.01406	0.011866
TCONS_00155208	XLOC_060536	XLOC_060536	0.012897	0	0.023634	0.035944	0.093112	0	0.062321	0	0.03667
TCONS_00160422	XLOC_062220	XLOC_062220	0	0	0	0.05342	0.068841	0	0	0	0.037369
TCONS_00178574	XLOC_068371	XLOC_068371	0.019062	0.018526	0	0.024504	0.079531	0.007315	0	0.007315	0
TCONS_00198145	ENSG00000168813	ZNF507	0.004669	0.012269	0.011865	0.016139	0.239219	0.011217	0.027075	0.011217	0.029531
TCONS_00189186	ENSG00000242221	PSG2	0.003544	0	0	0	0.005342	0	0	0	0
TCONS_00191805	ENSG00000170889	RPS9	0.061064	0	0.001716	0.041127	0.083893	0.002645	0.029083	0.002645	0
TCONS_00219531	XLOC_082801	XLOC_082801	0	0	0	0.068012	0.085851	0	0.065672	0	0
TCONS_00220363	ENSG00000170745	KCNS3	0	0	0.031516	0.044426	0.115799	0.023344	0.020535	0.023344	0.034638
TCONS_00207553	ENSG00000115507	OTX1	0.04223	0.011758	0.009761	0.005915	0.393535	0	0.03358	0	0.008009
TCONS_00214031	ENSG00000172878	METAP1D	0.022373	0.027811	0	0.019997	0.201554	0.004426	0.033299	0.004426	0.032088
TCONS_00232445	ENSG00000115425	PECR	0.009621	0	0	0.351436	0.438489	0	0	0	0
TCONS_00233164	ENSG00000135905	DOCK10	0.002712	0.079525	0.056426	0.084743	0.261151	0.009341	0.094274	0.009341	0.014354
TCONS_00233445	ENSG00000163053	SLC16A14	0	0	0	0.004298	0.017588	0.002091	0	0.002091	0.008091
TCONS_00246467	ENSG00000160216	AGPAT3	0.076917	0.033645	0.02444	0.061263	0.197264	0.008501	0.056511	0.008501	0.077905
TCONS_00253123	XLOC_097266	XLOC_097266	0.030804	0	0.073146	0.141851	0.299302	0.085272	0.025818	0.085272	0
TCONS_00257409	XLOC_098798	XLOC_098798	0	0	0.014929	0.014531	0.038326	0	0.033806	0	0
TCONS_00272841	ENSG00000008226	DLEC1	0.094324	0	0	0.026221	0.084475	0	0	0	0
TCONS_00280177	ENSG00000206199	ANKUB1	0.004489	0.000895	0.004721	0.042102	0.081893	0.003359	0.036505	0.003359	0.017222
TCONS_00283576	ENSG00000068078	FGFR3	0.021138	0.082532	0.17536	0.179073	0.300997	0.015177	0.041205	0.015177	0.009639
TCONS_00284238	ENSG00000163995	ABLIM2	0	0.038934	0	0.025029	0.096762	0.021266	0	0.021266	0
TCONS_00296036	XLOC_115044	XLOC_115044	0	0	0.009485	0.062666	0.087446	0.019689	0	0.019689	0
TCONS_00313492	XLOC_123093	XLOC_123093	0.020317	0	0	0.006846	0.056619	0	0	0	0
TCONS_00315446	ENSG00000113163	COL4A3BP	0	0.007157	0.016083	0.024102	0.042821	0.00191	0.011951	0.00191	0
TCONS_00304624	XLOC_119088	XLOC_119088	0	0.028799	0	0.06628	0.066433	0	0.013409	0	0
TCONS_00318997	XLOC_125911	XLOC_125911	0.028445	0.033686	0	0.020329	0.066604	0	0	0	0.009527
TCONS_00308090	ENSG00000185129	PURA	0.1262	0	0	0.191672	0.460937	0.053917	0	0.053917	0
TCONS_00319698	ENSG00000186314	PRELID2	0	0.001826	0.005779	0.012184	0.096438	0.00566	0	0.00566	0.005787
TCONS_00310013	ENSG00000145934	TENM2	0.079417	0.006456	0.016962	0.031473	0.214711	0.02894	0.046288	0.02894	0.056633
TCONS_00322854	ENSG00000096696	DSP	0	0.001283	0	0.029477	0.036851	0.002007	0.00863	0.002007	0.00577
TCONS_00333590	ENSG00000164304	CAGE1	0	0	0	0.027462	0.064659	0	0	0	0
TCONS_00324034	XLOC_128154	XLOC_128154	0.017849	0.02505	0.111051	0.094438	0.37899	0.062779	0.056791	0.062779	0.066601
TCONS_00335432	XLOC_133859	XLOC_133859	0.136749	0.010768	0.058583	0.093941	0.190731	0	0.022404	0	0.03943
TCONS_00326181	XLOC_128924	XLOC_128924	0.013503	0	0	0.015871	0.039371	0.006425	0	0.006425	0.007327
TCONS_00329256	ENSG00000279170	TSTD3	0	0.00531	0.005137	0.020457	0.062997	0.019226	0.002197	0.019226	0.003329
TCONS_00331499	XLOC_131848	XLOC_131848	0	0	0	0.081653	0.105224	0	0	0	0
TCONS_00344340	ENSG00000122512	PMS2	0	0	0	0	0.093235	0	0	0	0
TCONS_00346277	ENSG00000002746	HECW1	0	0.006998	0	0.007944	0.081517	0.00484	0.006414	0.00484	0.013863
TCONS_00346769	ENSG00000158683	PKD1L1	5.5e-05	0	0.043905	0.031578	0.067091	0.018901	0	0.018901	0.011497
TCONS_00365141	ENSG00000134013	LOXL2	0	0	0	0.167616	0.498386	0	0	0	0
TCONS_00370987	XLOC_149168	XLOC_149168	0	0	0.009885	0.079891	0.075615	0.007905	0	0.007905	0
TCONS_00371205	ENSG00000181638	ZFP41	0.025372	0.024819	0.019104	0.026187	0.122535	0.014769	0.007465	0.014769	0.013774
TCONS_00390514	XLOC_158095	XLOC_158095	0	0	0.003461	0.012186	0.040625	0.013551	0	0.013551	0.016162
TCONS_00393417	XLOC_159640	XLOC_159640	0.052574	0	0.012272	0.039527	0.122424	0	0	0	0.025898
TCONS_00385750	XLOC_156099	XLOC_156099	0.009744	0	0	0	0.050065	0	0	0	0.004804
TCONS_00386123	XLOC_156348	XLOC_156348	0	0	0	0.028864	0.111589	0.014954	0	0.014954	0
TCONS_00386383	XLOC_156488	XLOC_156488	0.025876	0	0.015174	0.023508	0.158995	0.023465	0.010377	0.023465	0
TCONS_00408515	XLOC_166831	XLOC_166831	0.072521	0	0.025873	0.112537	0.190002	0	0	0	0.112909

## Sheet: lncRNA_UV_cluster 6
transcript_id	gene_id	gene_name	C_0	UV_3	UV_6	UV_9	UV_12	UV_24	UV_48	UV_24	UV_96
ENST00000647616	ENSG00000285604	AL357835.1	0	0	0	0	0	0.005643	0	0.005643	0
ENST00000453554	ENSG00000228549	BX284668.2	0	0	0	0	0	0.015169	0	0.015169	0
ENST00000457856	ENSG00000228549	BX284668.2	0	0	0	0	0	0.003967	0	0.003967	0
ENST00000633433	ENSG00000282740	AL021920.3	0	0	0	0	0.008647	0.023872	0	0.023872	0
ENST00000445073	ENSG00000235358	AC093151.3	0	0	0	0	0	0.009076	0	0.009076	0
ENST00000450004	ENSG00000226957	AL358075.1	0	0	0	0	0	0.010973	0	0.010973	0
ENST00000435739	ENSG00000229294	AL139294.1	0	0	0	0	0	0.014486	0	0.014486	0
ENST00000414132	ENSG00000237919	AL158840.1	0	0	0	0	0	0.02694	0	0.02694	0
ENST00000602672	ENSG00000225206	MIR137HG	0	0	0	0	0	0.011905	0	0.011905	0
ENST00000450155	ENSG00000231346	LINC01160	0	0	0	0	0	0.006574	0	0.006574	0
ENST00000598103	ENSG00000234222	LIX1L-AS1	0	0	0	0	0	0.003659	0	0.003659	0
ENST00000448561	ENSG00000234222	LIX1L-AS1	0	0	0	0	0	0.024909	0	0.024909	0
ENST00000453778	ENSG00000243613	AL513523.4	0.000112	0	0	0	0	0.001148	0	0.001148	0
ENST00000424435	ENSG00000228013	IL6R-AS1	0	0	0	0	0	0.004224	0	0.004224	0
ENST00000608147	ENSG00000273026	AL358472.3	0.020301	0.000793	0.033442	0.032294	0.01907	0.326834	0.000974	0.326834	0.005874
ENST00000426709	ENSG00000231605	LINC01363	0	0	0	0	0	0.009942	0	0.009942	0
ENST00000428399	ENSG00000236889	AC244035.2	0	0.00396	0	0	0	0.020086	0	0.020086	0
ENST00000444750	ENSG00000229983	AL606468.1	0	0.002074	0	0	0	0.007256	0	0.007256	0
ENST00000613697	ENSG00000276997	AL513314.2	0	0	0	0	0	0.035731	0	0.035731	0
ENST00000424451	ENSG00000228625	AL451047.1	0	0	0	0	0	0.027336	0	0.027336	0
ENST00000418348	ENSG00000237481	AL117350.1	0	0	0	1.3e-05	0	0.000859	0	0.000859	0.000124
ENST00000450783	ENSG00000233461	AL445524.1	0	0	0	0	0	0.004792	0	0.004792	0
ENST00000418557	ENSG00000238005	AL391832.2	0	0	0	0	0	0.04962	0	0.04962	0
ENST00000434470	ENSG00000232656	IDI2-AS1	0	0	0	0	0	0.008641	0	0.008641	0
ENST00000421657	ENSG00000228302	AL512770.1	0	0	0	0	0	0.003875	0	0.003875	0
ENST00000433455	ENSG00000232739	AL607028.1	0	0	0	0	0	0.018683	0	0.018683	0
ENST00000451929	ENSG00000233395	LINC00841	0	0	0	0	0	0.001221	0.000206	0.001221	0
ENST00000619719	ENSG00000232682	AL592430.1	0	0	0	0	0	0.015874	0	0.015874	0
ENST00000428346	ENSG00000235356	AL592466.1	0	0	0	0	0	0.001852	0	0.001852	0
ENST00000448214	ENSG00000232342	AC022540.1	0	0	0	0	0	0.023058	0	0.023058	0
ENST00000438554	ENSG00000235426	AL133481.1	0	0	0	0	0	0.008515	0	0.008515	0
ENST00000369391	ENSG00000233547	AL158212.2	0	0	0	0	0	0.050878	0	0.050878	0.003169
ENST00000426021	ENSG00000177640	CASC2	0	0	0.000184	0	0	0.00128	0	0.00128	0
ENST00000648536	ENSG00000227165	WDR11-AS1	0	0	0	0	0	0.003551	0	0.003551	0
ENST00000602756	ENSG00000251661	AC136475.1	0	0	0	0	0	0.005588	0	0.005588	0
ENST00000509204	ENSG00000249086	AC051649.1	0	0	0	0	0	0.035845	0	0.035845	0.011844
ENST00000529328	ENSG00000251381	LINC00958	0	0	0	0	0	0.00972	0	0.00972	7.4e-05
ENST00000533886	ENSG00000255478	AP000944.1	0	0	0	0	0	0.004103	0	0.004103	0
ENST00000473849	ENSG00000239553	RN7SL12P	0	0	0	0	0	0.012788	0	0.012788	0
ENST00000602951	ENSG00000255517	AP002748.3	0.004571	0.010835	0.020299	0.00724	0.026295	0.473545	0.022948	0.473545	0.006329
ENST00000511677	ENSG00000251637	AP003716.1	0	0	0	0	0	0.00438	0	0.00438	0.002042
ENST00000542410	ENSG00000255741	AP000808.2	0	0	0	0	0	0.015391	0	0.015391	0.006357
ENST00000536683	ENSG00000245552	AP000787.1	0	0	0	0	0	0.004803	0	0.004803	0
ENST00000602900	ENSG00000270179	AP002840.2	0	0	0	0	0	0.009889	0	0.009889	0
ENST00000527511	ENSG00000250303	AP002884.1	0	0	0	0	0	0.067146	0	0.067146	0
ENST00000500970	ENSG00000245248	USP2-AS1	0	0	0	0	0	0.001415	0	0.001415	0
ENST00000530002	ENSG00000245248	USP2-AS1	0	0	0	0	0	0.009708	0	0.009708	0
ENST00000578216	ENSG00000263873	AP003396.5	0	0	0	0	0	0.068203	6e-05	0.068203	0
ENST00000529229	ENSG00000255247	AP003390.2	0	0	0	0	0	0.013268	0	0.013268	0
ENST00000533812	ENSG00000254842	LINC02551	0	0.001012	0	0	0.001344	0.044207	0.00809	0.044207	0
ENST00000419440	ENSG00000238117	AP000844.2	0	0	0	0	0	0.040801	0	0.040801	0
ENST00000648642	ENSG00000285704	AC004765.1	0	0	0	0	0	0.006325	0	0.006325	0
ENST00000537149	ENSG00000256862	AC005842.1	0	0	0	0	0	0.01094	0	0.01094	0
ENST00000539784	ENSG00000256197	TSPAN9-IT1	0.002944	0	0	0	0	0.016813	0	0.016813	0
ENST00000456135	ENSG00000226711	FAM66C	0	0	0	0	0	0.003613	0	0.003613	0.001284
ENST00000535911	ENSG00000256155	LINC02598	0	0	0	0	0	0.013198	0	0.013198	0
ENST00000473753	ENSG00000247934	AC022364.1	1.3e-05	4.2e-05	0	1.4e-05	6.9e-05	0.119443	0.031273	0.119443	2.3e-05
ENST00000547824	ENSG00000257225	AC079601.1	0	0	0	0	0	0.009907	0.003358	0.009907	0
ENST00000380601	ENSG00000205537	AC121338.1	0	0	0	0	0	0.004398	0	0.004398	0
ENST00000512916	ENSG00000249641	HOXC13-AS	0	0	0	0	0	0.010536	0	0.010536	0
ENST00000548617	ENSG00000257477	LINC01154	0.002522	0	0	0	0	0.010339	0	0.010339	0
ENST00000552785	ENSG00000258086	AC079313.1	0.007629	0.002015	0.002874	0.007295	0.013239	0.245755	0.010504	0.245755	0.018043
ENST00000549616	ENSG00000258168	AC025569.1	0	0	0	0	0	0.027535	0	0.027535	0
ENST00000553194	ENSG00000258343	AC090001.1	0	0	0	0	0	0.029647	0	0.029647	0
ENST00000548329	ENSG00000258240	AC002351.1	0	0	0	0	0	0.020545	0	0.020545	0
ENST00000618674	ENSG00000278084	AC069503.3	0	0	0	0	0	0.065475	0	0.065475	0
ENST00000544645	ENSG00000256193	LINC00507	0	0	0	0	0	0.00082	0	0.00082	0
ENST00000542980	ENSG00000256151	ADGRD1-AS1	0	0	0	0.005606	0	0.022458	0	0.022458	0
ENST00000448887	ENSG00000225350	FREM2-AS1	0	0	0	0	0	0.008847	0	0.008847	0
ENST00000458282	ENSG00000231817	LINC01198	0	0	0	0	0	0.009983	0	0.009983	0
ENST00000596303	ENSG00000236778	INTS6-AS1	0	0	0	0	0	0.006646	0	0.006646	0
ENST00000453832	ENSG00000228824	MIR4500HG	0	0	0	0	0	0.018873	0	0.018873	0
ENST00000614099	ENSG00000275830	AL355974.2	0	0	0	0	0	0.005308	0	0.005308	0
ENST00000553419	ENSG00000258459	AL356019.1	0	0	0	0.007277	0	0.013293	0	0.013293	0
ENST00000645684	ENSG00000277128	AL589743.5	0	0.000507	0	0	0	0.001556	0	0.001556	0
ENST00000551932	ENSG00000257310	AL589743.2	0	0	0	0	0	0.00057	0	0.00057	0
ENST00000555109	ENSG00000258744	AL132800.1	0.016444	0	0	0	0	0.029427	0	0.029427	0
ENST00000549844	ENSG00000250365	AL139353.2	0	0	0	0	0	3e-06	0	3e-06	0
ENST00000623749	ENSG00000259002	AL445363.1	0	0	0	0	0	0.006311	0	0.006311	0
ENST00000364525	ENSG00000201395	RN7SKP257	0	0	0	0	0	0.024003	0	0.024003	0
ENST00000648024	ENSG00000285830	AL109628.2	0	0	0	0	0	0.001629	0	0.001629	0
ENST00000627309	ENSG00000279636	AL132989.2	0	0	0	0	6e-06	0.000177	0	0.000177	7e-06
ENST00000553628	ENSG00000258478	AC009396.1	0	0	0	0	0	0.006874	0	0.006874	0
ENST00000555272	ENSG00000259107	LINC00911	0	0	0	0	0	4e-05	0	4e-05	0
ENST00000556942	ENSG00000258752	AL357093.2	0	0	0	0	0	0.007447	0	0.007447	0
ENST00000555725	ENSG00000259082	LINC02314	0	0	0	0	0	0.018093	0	0.018093	0
ENST00000647892	ENSG00000285948	AC123768.5	0	0	0	0	0	0.001911	0	0.001911	0
ENST00000622487	ENSG00000273855	AC020658.5	0.002303	0	0	0	0	0.029031	0	0.029031	0
ENST00000309874	ENSG00000174171	AC020659.1	0	0	0	0	0	0.001052	0	0.001052	0
ENST00000560380	ENSG00000259298	AC012170.2	0	0	0	0	0	0.013373	0	0.013373	0
ENST00000559495	ENSG00000259265	AC027088.3	0	0	0	0	0	0.017012	0	0.017012	0
ENST00000570202	ENSG00000260608	AC024270.4	0	0	0	0.017003	0	0.035809	0	0.035809	0
ENST00000619015	ENSG00000251209	LINC00923	0	0	0	0	0	0.004454	0	0.004454	0
ENST00000619812	ENSG00000275443	AC012409.2	0	0	0	0	0	0.005232	0	0.005232	0
ENST00000559400	ENSG00000259219	AC084855.2	0	0	0	0	0	0.003099	0	0.003099	0
ENST00000569574	ENSG00000260439	LMF1-AS1	0.005596	0	0	0	0	0.010536	0	0.010536	0
ENST00000567888	ENSG00000260778	AC009065.4	0	2.7e-05	5e-06	9e-06	2e-06	0.000103	0	0.000103	0
ENST00000650502	ENSG00000262468	LINC01569	0	0	0	0	0	0.161931	0	0.161931	0
ENST00000565934	ENSG00000260276	AC022167.2	0	0	0.014122	0	0	0.105454	0	0.105454	0
ENST00000571158	ENSG00000262117	BCAR4	0	0	0	0	0	0.004188	0	0.004188	0
ENST00000566764	ENSG00000260635	AC092338.2	0	0	0	0	0	0.032339	0	0.032339	0
ENST00000569459	ENSG00000261346	AC116348.3	0	0	0	0	0	0.01587	0	0.01587	0
ENST00000561923	ENSG00000260867	AC009107.1	0	0	0	0	0	0.004645	0	0.004645	0
ENST00000567448	ENSG00000260186	LINC02137	0	0	0	0	0	0.0046	0	0.0046	0
ENST00000569843	ENSG00000260441	AC020978.2	0	0	0	0	0	0.04567	0	0.04567	0
ENST00000606707	ENSG00000272330	AC002044.1	0.00399	0	0	0	0	0.034895	0	0.034895	0
ENST00000641075	ENSG00000284675	AC116667.2	0	0	0	0	0	0.009012	0	0.009012	0
ENST00000567851	ENSG00000260706	AC022166.1	0	0	0	0	0	0.00184	0	0.00184	0
ENST00000561634	ENSG00000260737	LINC01227	0	0	0	0	0	0.016827	0	0.016827	0
ENST00000563841	ENSG00000261029	AC138304.1	0	0	0	0	0	0.014492	0	0.014492	0
ENST00000565714	ENSG00000260228	AC009119.1	0.011792	0	0	0	0	0.028	0	0.028	0
ENST00000563993	ENSG00000260498	AC126696.3	0	0	0	0	0	0.012899	0	0.012899	0
ENST00000570230	ENSG00000260528	FAM157C	0	0	0	0	0	0.003303	0	0.003303	0
ENST00000315707	ENSG00000178977	LINC00324	0	0.002478	0	0	0.007122	1.80363	0.006507	1.80363	0
ENST00000581366	ENSG00000263400	TMEM220-AS1	0	0	0.000204	6.5e-05	0	0.030165	0	0.030165	0
ENST00000437646	ENSG00000227078	LINC02094	0	0	0	0	0	0.014264	0	0.014264	0
ENST00000587058	ENSG00000267644	AC061975.7	0	0	0	0	0	0.005898	0	0.005898	0
ENST00000585189	ENSG00000265168	AC005726.4	0	0	0	0	0	0.003899	0	0.003899	0
ENST00000580782	ENSG00000265845	AC024267.4	0.009982	0	0	0	0	0.032579	0	0.032579	0.001407
ENST00000584499	ENSG00000266340	AC138207.7	0	0	0	0	0	0.011103	0	0.011103	0
ENST00000584125	ENSG00000264083	AC005899.1	0	0	0	0	0	0.010804	0	0.010804	0
ENST00000581360	ENSG00000266718	AC079336.5	0	0	0	0	0	0.004225	0	0.004225	0
ENST00000612426	ENSG00000273687	AC004223.4	0.001899	0	0	0	0	0.027777	0	0.027777	0
ENST00000592908	ENSG00000267074	AC015911.3	0	0	0	0	0	0.006837	0	0.006837	0
ENST00000577557	ENSG00000266088	AC004585.1	0	0	0	0	0	0.120454	0	0.120454	0
ENST00000581080	ENSG00000265666	RARA-AS1	0	0	0	0	0	0.001091	0	0.001091	0
ENST00000588504	ENSG00000267278	MAP3K14-AS1	0	0	0	0	0	0.002277	0	0.002277	0
ENST00000590100	ENSG00000267278	MAP3K14-AS1	0	0	0	0	0	0.013921	0	0.013921	0
ENST00000429755	ENSG00000233101	HOXB-AS3	0	0.009986	0	0	0	0.051063	0	0.051063	0
ENST00000588604	ENSG00000267207	AC005884.1	0	0	0	0	0	0.005833	0	0.005833	0
ENST00000607478	ENSG00000272386	AC015802.5	0.005069	0	0	0	0	0.025715	0	0.025715	0
ENST00000581905	ENSG00000264235	AP005329.1	0	0	0	0	0	0.021069	0	0.021069	0
ENST00000579509	ENSG00000266767	AP000897.2	0	0	0	0	0	0.006783	0	0.006783	0
ENST00000582435	ENSG00000263627	PPP4R1-AS1	0	0.010434	0	0.014222	0	0.063174	0	0.063174	0.003929
ENST00000587889	ENSG00000266961	AP005482.2	0	0	0	0	0	0.013703	0	0.013703	0
ENST00000589617	ENSG00000267399	AC006305.2	0	0	0	0	0	0.013437	0	0.013437	0
ENST00000586467	ENSG00000267402	TCF4-AS2	0	0	0	0	0	0.014823	0	0.014823	0
ENST00000591014	ENSG00000267560	AC027514.2	0	0	0	0	0	0.005929	0	0.005929	0
ENST00000581844	ENSG00000264699	LINC01912	0	0	0	0	0.009425	0.031652	0	0.031652	0.004601
ENST00000591008	ENSG00000176840	MIR7-3HG	0	0	0	0	0	0.025165	0	0.025165	0
ENST00000590065	ENSG00000267212	AC018761.3	0	0	0	0	0	0.026645	0	0.026645	0
ENST00000644590	ENSG00000214049	UCA1	0	0	0	0	0	0.008585	0	0.008585	0
ENST00000645177	ENSG00000214049	UCA1	0	0	0	0	0	0.071153	0	0.071153	0
ENST00000594678	ENSG00000269836	AC020913.3	0.003362	0	0	0	0	0.03293	0	0.03293	0
ENST00000592022	ENSG00000267383	AC011447.3	0	0	0	0	0	0.00351	0	0.00351	0
ENST00000588717	ENSG00000267353	AC020928.3	0.001793	0	0	0	0	0.010105	0	0.010105	0
ENST00000652687	ENSG00000267605	AC016590.1	0	0	0	0	0	0.013663	0	0.013663	0
ENST00000587477	ENSG00000226686	LINC01535	0	0	0	0	0	0.017612	0	0.017612	0
ENST00000597303	ENSG00000267992	AC010605.1	0	0	0	6e-05	0	0.001081	0	0.001081	0
ENST00000595673	ENSG00000268621	IGFL2-AS1	0	0	0	0	0	0.125603	0.008725	0.125603	0.006808
ENST00000500689	ENSG00000245598	DACT3-AS1	0	0	0	0	0	0.011376	0	0.011376	0.004906
ENST00000585559	ENSG00000267117	AC010525.1	0.01882	0	0	0	0	0.048102	0	0.048102	0.008169
ENST00000593218	ENSG00000267421	AC005498.2	7.8e-05	0.000288	0.000202	0.000366	0.000206	0.019111	0.000305	0.019111	0.000385
ENST00000599728	ENSG00000268895	A1BG-AS1	0.00166	0	0.006432	0.014556	0.020273	0.082207	0	0.082207	0
ENST00000442956	ENSG00000236790	LINC00299	0	0	0	0	0	0.004142	0	0.004142	0
ENST00000432142	ENSG00000236204	LINC01376	0	0	0	0	0	0.005109	0	0.005109	0
ENST00000457901	ENSG00000233005	AC018742.1	0	0	0	0	0	0.014716	0	0.014716	0
ENST00000626865	ENSG00000232973	CYP1B1-AS1	0	0	0	0	0	0.006654	0	0.006654	0
ENST00000413828	ENSG00000232973	CYP1B1-AS1	0	0	0	0	0	0.002971	0	0.002971	0
ENST00000620276	ENSG00000227028	SLC8A1-AS1	0	0	0	0	0	0.006844	0.002968	0.006844	0
ENST00000649883	ENSG00000230773	AC092650.1	0	0	0	0	0	0.002843	0	0.002843	0
ENST00000649346	ENSG00000285755	AC132153.1	0	0	0	0	0	0.001587	0	0.001587	0.000267
ENST00000412957	ENSG00000237737	DCTN1-AS1	0	0	0	0	0	0.00447	0	0.00447	0
ENST00000607984	ENSG00000230606	AC092683.1	0	0	0	0	0	0.008812	0	0.008812	0
ENST00000620051	ENSG00000230606	AC092683.1	4.6e-05	0	6.1e-05	2.5e-05	9e-06	0.007051	0	0.007051	0
ENST00000411710	ENSG00000228763	LIMS1-AS1	0	0	0	0	0	0.007619	0	0.007619	0
ENST00000336905	ENSG00000204588	LINC01123	0	0	0	0.008713	0	0.083307	0	0.083307	0
ENST00000627378	ENSG00000235066	AC009303.2	0	0	0	0	0	0.025035	0	0.025035	0
ENST00000615163	ENSG00000231890	DARS-AS1	0	0	0	0	0	0.003048	0	0.003048	0
ENST00000412593	ENSG00000230569	AC114763.2	0	0	0	0	0	0.0088	0	0.0088	0
ENST00000629997	ENSG00000226674	TEX41	0	0	0	0	0	0.045478	0	0.045478	0.012499
ENST00000609376	ENSG00000238057	ZEB2-AS1	0	0	0	0	0	0.012049	0.003562	0.012049	0
ENST00000342892	ENSG00000204380	PKP4-AS1	0.000418	3.1e-05	0.00036	6e-06	0.000569	0.009486	0	0.009486	0
ENST00000651673	ENSG00000236107	SCN1A-AS1	0	0	0	0	0	0.002139	0	0.002139	0
ENST00000419609	ENSG00000238133	MAP3K20-AS1	0	0	0	0	0	0.00339	0	0.00339	0
ENST00000442996	ENSG00000236449	AC010894.3	0.002986	0	0	0	0	0.00924	0	0.00924	0
ENST00000604692	ENSG00000270956	AC009948.3	0	0	0	0	0	0.001978	0	0.001978	0
ENST00000625221	ENSG00000233766	AC098617.1	0	0	0	0	0	0.036855	0	0.036855	0
ENST00000411433	ENSG00000237281	CATIP-AS2	0	0	0	0	0	0.006451	0	0.006451	0
ENST00000446709	ENSG00000234193	AC013476.1	0	0	0	0	0	0.000737	0	0.000737	0
ENST00000425192	ENSG00000228802	AC073641.1	0	0	0	0	0	0.015791	0	0.015791	0
ENST00000606119	ENSG00000236432	AC097662.1	0	0	0.000843	0	0	0.016021	0	0.016021	0
ENST00000437673	ENSG00000236432	AC097662.1	0	0	0.012384	0	0	0.023787	0	0.023787	0
ENST00000396588	ENSG00000236432	AC097662.1	0	0	0	0	0	0.001805	0	0.001805	0
ENST00000517197	ENSG00000253006	RN7SKP283	0	0	0	0	0	0.008058	0	0.008058	0
ENST00000454890	ENSG00000230385	AC012507.1	0.006241	0	0	0	0	0.014216	0	0.014216	0
ENST00000440498	ENSG00000235529	AGAP1-IT1	0	0	0	0	0	0.001676	0	0.001676	0
ENST00000609470	ENSG00000234684	SDCBP2-AS1	0	0	0	0	0	0.263766	0.011338	0.263766	0
ENST00000616569	ENSG00000277425	AL121890.4	0	0	0	0	0	0.018842	0.004977	0.018842	0
ENST00000448859	ENSG00000232900	AL050403.1	0	0	0	0	0	0.002588	0	0.002588	0
ENST00000428254	ENSG00000213742	ZNF337-AS1	0	0	0	0	0.002749	0.015836	0	0.015836	0
ENST00000432859	ENSG00000285230	RALY-AS1	0	0	0	0	0	0.014736	0	0.014736	0
ENST00000452336	ENSG00000234693	AL353653.1	0	0	0	0	0	0.008199	0	0.008199	0.003275
ENST00000613231	ENSG00000278709	NKILA	0	0	0	0	0	0.000557	0	0.000557	0
ENST00000613401	ENSG00000274501	AL121845.4	0	0	0	0	0	0.040398	0	0.040398	0
ENST00000426418	ENSG00000234052	LINC01673	0	0	0	0	0	0.025553	0	0.025553	0
ENST00000431661	ENSG00000215533	LINC00189	0	0	0	0	0	0.000482	0	0.000482	0
ENST00000416145	ENSG00000227456	LINC00310	0	0	0	0	0	0.002808	0	0.002808	0
ENST00000419881	ENSG00000227456	LINC00310	0	0	0	0	0	0.021568	0	0.021568	0
ENST00000440714	ENSG00000237609	AF064858.2	0	0	0	0	0	0.017285	0	0.017285	0
ENST00000418029	ENSG00000223901	AP001469.1	0	0	7.8e-05	0	0	0.017719	0	0.017719	0
ENST00000468873	ENSG00000241333	RN7SL385P	0	0	0	0	0	0.023469	0	0.023469	0
ENST00000446578	ENSG00000182057	OGFRP1	0	0	0	0	0	0.002632	0	0.002632	0
ENST00000651445	ENSG00000224271	AL117329.1	0	0	0.002438	0.000415	0	0.005428	0	0.005428	0
ENST00000652123	ENSG00000224271	AL117329.1	0	0	0	0	0	0.003645	0	0.003645	0
ENST00000428681	ENSG00000228242	AC093495.1	0	0	0	0	0	0.000276	0	0.000276	0
ENST00000424242	ENSG00000235629	AC090952.1	0.004947	0	0	0	0	0.042384	0	0.042384	0
ENST00000599742	ENSG00000249786	EAF1-AS1	0	0	0	0	0	0.026255	0	0.026255	0
ENST00000478366	ENSG00000239799	ITIH4-AS1	0	0	0	0	0	0.025865	0	0.025865	0
ENST00000487928	ENSG00000241587	RN7SL482P	0	0	0	0	0.020637	0.051687	0	0.051687	0.003788
ENST00000476021	ENSG00000239519	CADM2-AS1	0	0	0	0	0	0.002793	0	0.002793	0
ENST00000460707	ENSG00000240057	AC078785.1	0	0	0	0	0	0.049917	0	0.049917	0
ENST00000482019	ENSG00000240006	LINC02004	0	0	0	0	0	0.104845	0	0.104845	0.016272
ENST00000496247	ENSG00000241882	AC124893.1	0	0	0	0.000482	0	0.004298	0	0.004298	0
ENST00000439009	ENSG00000228221	LINC00578	0	0	0	0	0	0.013685	0	0.013685	0
ENST00000432385	ENSG00000237978	KCNMB2-AS1	0	0	0	0	0	0.002779	0	0.002779	0
ENST00000646508	ENSG00000242808	SOX2-OT	0	0	0	0	0	0.005043	0	0.005043	0
ENST00000641158	ENSG00000223812	AC073365.1	0	0	0	0.000493	0	0.24774	0.000977	0.24774	0
ENST00000423318	ENSG00000237222	LINC01968	0	0	0.001031	0	0	0.003458	0	0.003458	0
ENST00000426109	ENSG00000223711	AC069213.1	0	0	0	0	0	0.009561	0	0.009561	0
ENST00000620737	ENSG00000242086	MUC20-OT1	0	0	0	0.025844	0	0.083798	0	0.083798	0
ENST00000438608	ENSG00000242086	MUC20-OT1	0	0	0	0	0	0.01181	0	0.01181	0
ENST00000627555	ENSG00000242086	MUC20-OT1	0	0	0	0	0	0.012921	0	0.012921	0
ENST00000627016	ENSG00000242086	MUC20-OT1	0	0	0	0	0	0.017586	0	0.017586	0
ENST00000627863	ENSG00000242086	MUC20-OT1	0	0.002812	0	0	0	0.039085	0	0.039085	0
ENST00000626872	ENSG00000242086	MUC20-OT1	0	0	0	0	0	1e-06	0	1e-06	0
ENST00000627471	ENSG00000242086	MUC20-OT1	0	0	0	0	0.008365	0.018274	0	0.018274	0
ENST00000512438	ENSG00000247708	STX18-AS1	0	0	0	0	0	0.020808	0	0.020808	0
ENST00000501965	ENSG00000246541	AC096746.1	0	0	0	0	0	0.000583	0	0.000583	0
ENST00000503456	ENSG00000250103	PANCR	0	0	0	0	0	0.009672	0	0.009672	0
ENST00000505632	ENSG00000250046	AC106864.1	0	0	0	0	0.012466	0.030069	0	0.030069	0
ENST00000513851	ENSG00000251432	LINC02615	0	0	0	0	0	0.019554	0	0.019554	0
ENST00000513711	ENSG00000248346	AC092435.1	0	0	0	0	0	0.008348	0	0.008348	0
ENST00000504182	ENSG00000248525	AC026787.1	0	0	0	0	0	0.00206	0	0.00206	0
ENST00000509037	ENSG00000250448	AC092335.1	0	0	0	0	0	0.00359	0	0.00359	0
ENST00000607056	ENSG00000272335	AC093297.2	0.01818	0.028024	0.031424	0.042809	0.026768	0.424408	0.015305	0.424408	0.023629
ENST00000651719	ENSG00000285999	AC025442.2	0	0	0	0	0	0.045961	0	0.045961	0
ENST00000647364	ENSG00000250802	ZBED3-AS1	0	0	0	0	0	0.017388	0	0.017388	0
ENST00000643269	ENSG00000250802	ZBED3-AS1	0	0	0.002931	0	0	0.010202	0	0.010202	0.000127
ENST00000646307	ENSG00000250802	ZBED3-AS1	0	0	0	0	0	0.018341	0	0.018341	0
ENST00000645183	ENSG00000250802	ZBED3-AS1	0.00017	4.6e-05	0	0	1.2e-05	0.001461	0	0.001461	0
ENST00000503007	ENSG00000249825	AC012636.1	0	0	0	0	0	0.003937	0	0.003937	0
ENST00000396880	ENSG00000236447	ATG10-IT1	0	0	0	0	0	0.01523	0	0.01523	0
ENST00000510274	ENSG00000245864	MEF2C-AS2	0	0	0	0	0	0.00729	0	0.00729	0
ENST00000445770	ENSG00000233828	LINC01949	0	0	0	0	0	0.002726	0	0.002726	0
ENST00000650583	ENSG00000248323	LUCAT1	0	0	0	0	0	0.014485	0	0.014485	0
ENST00000648137	ENSG00000248323	LUCAT1	0	0	0	0	0	0.000644	0	0.000644	0
ENST00000501338	ENSG00000247121	AC009126.1	0	0	0	0	0	0.008193	0	0.008193	0
ENST00000502324	ENSG00000248202	LINC02234	0	0	0	0	0	0.023225	2.9e-05	0.023225	0
ENST00000501173	ENSG00000245937	LINC01184	0	0	0	0	0	0.002749	0	0.002749	0
ENST00000503616	ENSG00000251680	AC008591.1	0	0	0	0	0	0.009608	0	0.009608	0
ENST00000555438	ENSG00000224186	C5orf66	0	0	0	0	0	0.007121	0	0.007121	0
ENST00000513259	ENSG00000281398	SNHG4	0	0	0	0	0	0.127052	3.3e-05	0.127052	0
ENST00000517206	ENSG00000253015	RN7SKP64	0	0	0	0	0	0.01304	0	0.01304	0
ENST00000624712	ENSG00000279726	AC005609.5	0	0	0	0	0	0.007044	0	0.007044	0
ENST00000519400	ENSG00000253141	AC008632.1	0.00436	0	0	0	0	0.039868	0	0.039868	0
ENST00000627866	ENSG00000281809	LINC01394	0	0	0	0	0	0.016941	0	0.016941	0.007163
ENST00000499096	ENSG00000247049	AC008443.2	0	0	0	0	0	0.006874	0	0.006874	4.2e-05
ENST00000650720	ENSG00000272168	CASC15	0.002217	0	0	0	0	0.005589	0	0.005589	0
ENST00000427196	ENSG00000232940	HCG25	0	0	0	0	0	0.015121	0	0.015121	0
ENST00000441845	ENSG00000236996	MLIP-IT1	0	0	0	0	0	0.030581	0	0.030581	0.006642
ENST00000436803	ENSG00000233237	LINC00472	0.006551	0	0	0	0	0.072052	0	0.072052	0
ENST00000522844	ENSG00000228624	HDAC2-AS2	0	0	0	0	0	0.014437	0	0.014437	0
ENST00000420557	ENSG00000231690	LINC00574	0	0	0	0	0	0.001336	0	0.001336	0
ENST00000649318	ENSG00000285887	AL009176.1	0	0	0	0	0	0.001778	0	0.001778	0
ENST00000411042	ENSG00000222974	RN7SKP228	0	0	0	0	0	0.031868	0	0.031868	0
ENST00000412563	ENSG00000223838	AC007091.1	0	0	0	0	0	0.012719	0	0.012719	0
ENST00000453564	ENSG00000226097	AC099342.1	0	0	0	0	0	0.045741	0	0.045741	0
ENST00000518947	ENSG00000254369	HOXA-AS3	0	0	0	0	0	0.005574	0	0.005574	0.001805
ENST00000628121	ENSG00000281404	LINC01176	0	0	0	0	0	0.018879	0	0.018879	0
ENST00000418395	ENSG00000243144	AC079760.2	0	0	0	0	0	0.000212	0	0.000212	0
ENST00000330148	ENSG00000182366	FAM87A	0	0	0	0	0	0.00165	0	0.00165	0
ENST00000517454	ENSG00000253168	AC124069.1	0	0	0	0	0	0.007517	0	0.007517	0
ENST00000519803	ENSG00000253270	AC090541.1	0	0	0	0	0	0.006618	0	0.006618	0
ENST00000518590	ENSG00000253986	AC104561.3	0	0	0	0	0	0.005187	0	0.005187	0
ENST00000522547	ENSG00000253430	AC011726.2	0	0	0	0	0	0.009831	0	0.009831	0.004062
ENST00000518662	ENSG00000254254	AC012349.1	0	0	0	0	0	0.002806	0	0.002806	0
ENST00000518750	ENSG00000253523	AC104350.1	0	0	0	0	0	0.007495	0	0.007495	0
ENST00000647777	ENSG00000228862	AC068389.1	0	0	0	0	0	0.003001	0	0.003001	0
ENST00000649904	ENSG00000285971	AC023095.1	0	0	0	0	0.003463	0.011137	0	0.011137	0
ENST00000522339	ENSG00000253983	AC087627.1	0	0	0	0	0	0.003627	0	0.003627	0
ENST00000522127	ENSG00000254080	AC115837.2	0	0	0	0	0	0.025172	0	0.025172	0
ENST00000521936	ENSG00000253553	AC090578.1	0.005364	0	0.006291	0	0	0.020196	0	0.020196	0
ENST00000521010	ENSG00000254315	AC023632.5	0	0	0	0	0	0.007581	0	0.007581	0
ENST00000523572	ENSG00000253633	AP002852.1	0	0	0	0	0	0.025058	0	0.025058	0
ENST00000522715	ENSG00000253669	GASAL1	0	0	0	0	0	0.003952	0	0.003952	0
ENST00000520455	ENSG00000253320	AZIN1-AS1	0	0	0	0	0	0.006258	0	0.006258	0
ENST00000622091	ENSG00000179577	AP003471.1	0	0	0	0	0	0.011075	0	0.011075	0
ENST00000524236	ENSG00000253434	LINC02237	0	0	0	0	0	0.000484	0	0.000484	0
ENST00000430457	ENSG00000225885	AC023590.1	0	0	0	0	0	0.004755	0	0.004755	0
ENST00000577765	ENSG00000263443	AC100872.1	0	0	0	0	0	0.006851	0	0.006851	0.002502
ENST00000519140	ENSG00000253167	WASHC5-AS1	0	0	0	0	0	0.019257	0	0.019257	0
ENST00000519319	ENSG00000253438	PCAT1	0	0	0	0	0	0.001107	0	0.001107	0
ENST00000561978	ENSG00000253438	PCAT1	0	0	0	0	0	0.022341	0	0.022341	0
ENST00000417577	ENSG00000232978	AL161909.2	0	0	0	0	0	0.014159	0	0.014159	0
ENST00000583719	ENSG00000240498	CDKN2B-AS1	0.005678	0	0	0	0	0.016153	0	0.016153	0
ENST00000445604	ENSG00000234665	AL512625.3	0	0	0	0	0	0.071414	0	0.071414	0
ENST00000626773	ENSG00000204706	MAMDC2-AS1	0	0	0	0	0	0.01169	0	0.01169	0
ENST00000415801	ENSG00000226237	GAS1RR	0.001796	0	0	0	0	0.007798	0	0.007798	0
ENST00000412122	ENSG00000225194	LINC00092	0	0	0	0	0	0.004155	0	0.004155	0
ENST00000529965	ENSG00000255145	STX17-AS1	0	0	0	0	0	0.066573	0	0.066573	0
ENST00000636028	ENSG00000234323	LINC01505	0	0	0	0	0	0.003228	0	0.003228	0
ENST00000644986	ENSG00000284977	AL160272.1	0	0	0	0	0	0.001438	0	0.001438	0
ENST00000603624	ENSG00000225361	PPP1R26-AS1	0.004511	0.001577	5.3e-05	0	0	0.026102	0	0.026102	0
ENST00000563018	ENSG00000260193	AL138781.1	0	0	0	0	0	0.30236	0.005217	0.30236	0.015838
ENST00000371390	ENSG00000203987	AL772363.1	0	0	0	0	0	0.001151	0	0.001151	0
ENST00000443929	ENSG00000236017	ASMTL-AS1	0	0	0	0	0	0.065806	0	0.065806	0
ENST00000579283	ENSG00000266710	RN7SL48P	0	0	0	0	0	0.012657	0	0.012657	0.002295
ENST00000603360	ENSG00000271199	AL353804.2	0	0	0	0	0	0.016657	0	0.016657	0
ENST00000652609	ENSG00000230590	FTX	0	0	0	0	0	0.002837	0	0.002837	0
ENST00000609896	ENSG00000231728	TMSB15B-AS1	0	0	0	0.000271	0	0.004526	0	0.004526	0
ENST00000553843	ENSG00000258545	RHOXF1-AS1	0	0	0	0	0	0.003529	0	0.003529	0
ENST00000430820	ENSG00000225235	INTS6L-AS1	0	0	0	0	0	0.006874	0	0.006874	0
ENST00000446383	ENSG00000226031	FGF13-AS1	0	0	0	0	0	0.026417	0	0.026417	0
ENST00000438219	ENSG00000235802	HCFC1-AS1	0	0	0.00528	0	0	0.036467	0	0.036467	0
ENST00000431027	ENSG00000227066	Z98257.1	0	0	0	0	0	0.00595	0	0.00595	0
ENST00000420354	ENSG00000231949	AL161638.1	0	0	0	0	0	0.009737	0	0.009737	0
ENST00000641212	ENSG00000284623	AL139158.3	0	0	0	0	0	0.004748	0	0.004748	0
ENST00000606809	ENSG00000272491	AL109659.2	0	0	0	0	0	0.008832	0	0.008832	0
ENST00000650063	ENSG00000233290	AL157944.1	0	0	0	0	0	0.001746	0	0.001746	0
ENST00000431862	ENSG00000228560	AL513323.1	0	0	0	0	0	0.006977	0	0.006977	0
ENST00000412357	ENSG00000230687	AL008626.1	0	0	0	0	0	0.00957	0	0.00957	0
ENST00000430776	ENSG00000228215	AL954650.1	0	0	0	0	0	0.003616	0	0.003616	0
ENST00000440162	ENSG00000225172	AC096631.1	0	0	0	0	0	0.016177	0	0.016177	0
ENST00000435973	ENSG00000227043	LINC01682	0	0	0	0	0	0.009809	0	0.009809	0
ENST00000632004	ENSG00000282317	AL451007.2	0	0	0	0	0	0.002811	0	0.002811	0
ENST00000422675	ENSG00000233451	AL513128.1	0	0	0	0	0	0.012146	0	0.012146	0
ENST00000648557	ENSG00000280809	LINC00836	0	0	0	0	0	0.003519	0	0.003519	0
ENST00000431395	ENSG00000229630	LINC01264	0	0	0	0	0	0.044502	0	0.044502	0
ENST00000456722	ENSG00000234580	AL356157.1	0	0	0	0	0	0.010133	0	0.010133	0
ENST00000442525	ENSG00000234736	FAM170B-AS1	0	0	0	0	0	0.003709	0	0.003709	0
ENST00000490382	ENSG00000242912	RN7SL384P	0	0	0	0	0	0.011366	0	0.011366	0
ENST00000532065	ENSG00000254438	AC022240.1	0	0	0	0	0	0.010844	0	0.010844	0
ENST00000530837	ENSG00000254820	AC107882.1	0	0	0	0	0	0.019437	0	0.019437	0
ENST00000447519	ENSG00000236304	AP001189.1	0	0	0	0	0	0.015604	0	0.015604	0
ENST00000537269	ENSG00000257084	MIR200CHG	0	0	0	0	0	0.020448	0	0.020448	0
ENST00000649143	ENSG00000285724	AC092110.1	0	0	0	0	0	0.004418	0	0.004418	0
ENST00000651189	ENSG00000286233	AC087885.1	0	0	0	0	0	0.005576	0	0.005576	0
ENST00000414562	ENSG00000235097	LINC00330	0	0	0	0	0	0.003365	0	0.003365	0
ENST00000625090	ENSG00000279325	AL136359.1	0	0	0	0	0	0.02366	0	0.02366	0
ENST00000423442	ENSG00000234787	LINC00458	0	0	0	0	0	0.006997	0	0.006997	0
ENST00000646895	ENSG00000285448	AL136961.1	0	0	0	0	0	0.00458	0	0.00458	0
ENST00000623100	ENSG00000197595	ATP11AUN	0	0	0	0	0	0.00331	0	0.00331	0
ENST00000548416	ENSG00000258314	AL589182.1	0	0	0	0	0	0.00654	0	0.00654	0
ENST00000649745	ENSG00000285727	AL136419.2	0	0	0	0	0	0.018336	0	0.018336	0
ENST00000549330	ENSG00000257845	LINC02294	0	0	0	0	0	0.010989	0	0.010989	0
ENST00000647916	ENSG00000259039	AL161804.1	0	0	0	0	0	0.003067	0	0.003067	0
ENST00000560376	ENSG00000259584	AC021755.2	0	0	0	0	0	0.008585	0	0.008585	0
ENST00000611946	ENSG00000276121	AC122108.2	0	0	0	0	0	0.002679	0	0.002679	0
ENST00000596241	ENSG00000231876	AC009158.1	0	0	0	0	0	0.021867	0	0.021867	0
ENST00000576842	ENSG00000261241	LINC02128	0	0	0	0	0	0.003299	0	0.003299	0
ENST00000566649	ENSG00000261803	LINC02140	0	0	0	0	0	0.003628	0	0.003628	0
ENST00000581412	ENSG00000261222	AC064805.1	0	0	0	0	0	0.014395	0	0.014395	0
ENST00000332012	ENSG00000185168	LINC00482	0	0	0	0	0	0.018332	0	0.018332	0
ENST00000580125	ENSG00000264735	AC145207.7	0	0	0	0	0	0.007716	0	0.007716	0
ENST00000582300	ENSG00000265752	AC010754.1	0	0	0	0	0	0.005348	0	0.005348	0
ENST00000582983	ENSG00000264464	AC091170.1	0	0	0	0	0	0.006774	0	0.006774	0
ENST00000650572	ENSG00000285695	AC016383.2	0	0	0	0	0	0.010206	0.004303	0.010206	0
ENST00000588402	ENSG00000267006	AC008507.2	0	0	0	0	0	0.006307	0	0.006307	0
ENST00000465059	ENSG00000243968	RN7SL402P	0	0	0	0	0	0.020884	0	0.020884	0
ENST00000597619	ENSG00000269842	AC011453.1	0	0	0	0	0	0.01324	0	0.01324	0
ENST00000454224	ENSG00000236008	LINC01814	0	0	0	0	0	0.001673	0	0.001673	0
ENST00000420404	ENSG00000228876	AC010745.2	0	0	0	0	0	0.004337	0	0.004337	0
ENST00000652679	ENSG00000286081	AC016682.1	0	0	0	0	0	0.00622	0	0.00622	0
ENST00000415174	ENSG00000226125	LINC01907	0	0	0	0	0	0.002345	0	0.002345	0
ENST00000457009	ENSG00000230010	AL049646.1	0	0	0	0	0	0.002223	0	0.002223	0
ENST00000454676	ENSG00000230725	AL035252.2	0	0	0	0	0	0.003512	0	0.003512	0
ENST00000547793	ENSG00000269103	RF00017	0	0	0	0	0	0.005136	0	0.005136	0
ENST00000416641	ENSG00000226956	AP000432.1	0	0	0	0	0	0.004791	0	0.004791	0
ENST00000434081	ENSG00000234880	LINC00163	0	0	0	0	0	0.003442	0	0.003442	0
ENST00000443243	ENSG00000235295	LINC01634	0	0	0	0	0	0.007444	0	0.007444	0
ENST00000420508	ENSG00000197210	AP000550.1	0	0	0	0	0	0.001923	0	0.001923	0
ENST00000609330	ENSG00000272942	AL022324.3	0	0	0	0	0	0.02949	0.012505	0.02949	0
ENST00000624442	ENSG00000280356	AL021877.2	0	0	0	0.00067	0	0.001388	0	0.001388	0
ENST00000619915	ENSG00000183822	NCF4-AS1	0	0	0.006837	0	0	0.022363	0	0.022363	0
ENST00000431327	ENSG00000223843	EFCAB6-AS1	0	0	0	0	0	0.002793	0	0.002793	0
ENST00000460077	ENSG00000187012	LINC00207	0	0	0	0	0	0.008126	0	0.008126	0
ENST00000440266	ENSG00000230599	AC018495.1	0	0	0	0	0	0.016409	0	0.016409	0
ENST00000465795	ENSG00000244461	LINC02077	0	0	0	0	0	0.018135	0	0.018135	0
ENST00000460586	ENSG00000241328	LINC02070	0	0	0	0	0	0.002807	0	0.002807	0
ENST00000490357	ENSG00000241168	AC128685.1	0	0	0	0	0	0.012092	0	0.012092	0.003929
ENST00000414309	ENSG00000214146	LINC02026	0	0	0	0	0	0.019632	0	0.019632	0
ENST00000585239	ENSG00000265882	RN7SL73P	0	0.00432	0	0	0	0.010792	0	0.010792	0
ENST00000515292	ENSG00000251182	LINC02497	0	0	0	0	0	0.010752	0	0.010752	0
ENST00000505575	ENSG00000248939	AC111198.1	0	0	0	0	0	0.011668	0	0.011668	0
ENST00000581065	ENSG00000265894	RN7SL357P	0	0	0	0	0	0.016344	0	0.016344	0
ENST00000652645	ENSG00000250333	AC093725.2	0	0	0	0	0	0.004179	0	0.004179	0
ENST00000517407	ENSG00000253170	AC108515.1	0	0	0	0	0	0.014128	0	0.014128	0
ENST00000651656	ENSG00000249343	LINC01333	0	0	0	0	0	0.002808	0	0.002808	0
ENST00000504297	ENSG00000250343	STK32A-AS1	0	0	0	0	0	0.009925	0	0.009925	0
ENST00000523742	ENSG00000254130	LINC01947	0	0	0	0	0	0.013104	0	0.013104	0
ENST00000521128	ENSG00000253686	LINC01484	0	0	0	0	0	0.006283	0	0.006283	0
ENST00000436804	ENSG00000229274	AL662860.1	0	0	0	0	0	0.010029	0	0.010029	0
ENST00000450540	ENSG00000223813	AC007255.1	0.005726	0	0	0	0	0.017781	0	0.017781	0
ENST00000440074	ENSG00000233219	AC008080.3	0	0	0	0	0	0.012166	0	0.012166	0
ENST00000443406	ENSG00000232458	LINC01450	0	0	0	0	0	0.002273	0	0.002273	0
ENST00000487094	ENSG00000233539	AC011294.1	0	0	0	0	0	0.022476	0	0.022476	0
ENST00000438324	ENSG00000232756	AC004990.1	0	0	0	0	0	0.004191	0	0.004191	0
ENST00000467823	ENSG00000266794	RN7SL7P	0	0	0	0	0	0.024889	0	0.024889	0
ENST00000401499	ENSG00000218672	AC008060.1	0	0	0	0	0	0.004766	0	0.004766	0
ENST00000569431	ENSG00000260426	AC008060.4	0.004192	0	0	0	0	0.007971	0	0.007971	0
ENST00000523090	ENSG00000253189	AC079054.1	0	0	0	0	0	0.014032	0	0.014032	0
ENST00000520487	ENSG00000254143	AC022733.2	0	0	0	0	0	0.006115	0	0.006115	0
ENST00000605981	ENSG00000271938	AC103724.4	0	0	0	0	0	0.074679	0	0.074679	0
ENST00000518739	ENSG00000253894	AC011124.2	0	0	0	0	0	0.002213	0	0.002213	0
ENST00000520259	ENSG00000253967	AC022730.4	0	0	0	0	0	0.003096	0	0.003096	0
ENST00000523871	ENSG00000254162	AC009812.3	0	0	0	0	0	0.005908	0	0.005908	0
ENST00000523870	ENSG00000253824	AP003472.1	0	0	0	0	0	0.013943	0	0.013943	0
ENST00000583427	ENSG00000263612	AF186192.3	0	0	0	0	0	0.00389	0	0.00389	0
ENST00000649122	ENSG00000285784	AL353595.1	0	0	0	0	0	0.014105	0	0.014105	0
ENST00000642095	ENSG00000284612	AL591543.1	0	0	0	0	0	0.001788	0	0.001788	0
ENST00000422909	ENSG00000232590	AL451127.1	0	0	0	0	0	0.004804	0	0.004804	0
ENST00000457003	ENSG00000236115	AL136097.2	0	0	0	0	0	0.038118	0	0.038118	0
ENST00000417135	ENSG00000223729	LINC02247	0	0	0	0	0	0.019832	0	0.019832	0
ENST00000371629	ENSG00000198454	PRR31	0	0	0	0	0	0.007423	0	0.007423	0
ENST00000420865	ENSG00000237531	AL672277.1	0	0	0	0	0	0.026396	0	0.026396	0
ENST00000562814	ENSG00000261435	AL592164.1	0	0	0	0	0	0.013758	0	0.013758	0
ENST00000604411	ENSG00000270641	TSIX	0	0	0	0	0	0.000401	0	0.000401	0
ENST00000641352	ENSG00000284618	AL391294.1	0	0	0	0	0	0.000456	0	0.000456	0
ENST00000626665	ENSG00000281566	AL157778.1	0	0	0	0	0	0.016999	0	0.016999	0.005504
ENST00000423667	ENSG00000225970	AL500522.1	0	0	0	0	0	0.006583	0	0.006583	0
ENST00000611750	ENSG00000278847	AC006157.1	0	0.013535	0	0	0	0.060593	0	0.060593	0.009121
TCONS_00005068	ENSG00000162526	TSSK3	0.011635	0	0	0.004096	0.003101	0.203787	0.00525	0.203787	0.002595
TCONS_00005793	ENSG00000127603	MACF1	0	0.001943	0	0	0	0.07743	0	0.07743	0
TCONS_00006151	XLOC_002650	XLOC_002650	0.001473	0	0	0	0	0.03573	0	0.03573	0
TCONS_00007721	ENSG00000162402	USP24	0	0	0	0	0	0.077261	0	0.077261	0
TCONS_00010029	XLOC_004119	XLOC_004119	0.146103	0	0	0	0	0.284927	0	0.284927	0
TCONS_00010072	XLOC_004149	XLOC_004149	0	0	0	0	0	0.029407	0	0.029407	0
TCONS_00012439	ENSG00000178104	PDE4DIP	0	0.002795	0.034698	0	0.010737	0.178349	0	0.178349	0
TCONS_00013773	ENSG00000132676	DAP3	0	0	0	0	0	0.112272	0	0.112272	0
TCONS_00014310	ENSG00000213085	CFAP45	0	0	0	0	0	0.006841	0	0.006841	0
TCONS_00015113	ENSG00000143196	DPT	0	0	0	0	0.034936	0.063124	0	0.063124	0
TCONS_00015470	ENSG00000135870	RC3H1	0	0	0	0	0	1.19599	0	1.19599	0
TCONS_00034860	XLOC_013905	XLOC_013905	0	0	0	0	0	0.079469	0	0.079469	0
TCONS_00016304	ENSG00000150681	RGS18	0	0	0	0	0	0.012498	0	0.012498	0
TCONS_00017475	ENSG00000266028	SRGAP2	0.008384	0	0	0	0	2.78822	0	2.78822	0
TCONS_00017472	ENSG00000266028	SRGAP2	0.01474	0.019486	0.011027	0.012382	0.028564	0.397212	0.00699	0.397212	0.025924
TCONS_00036391	XLOC_014681	XLOC_014681	0	0	0.005154	0	0	0.324202	0	0.324202	0.032309
TCONS_00017712	ENSG00000076356	PLXNA2	0	0	0	0	0	0.103353	0	0.103353	0.009449
TCONS_00018472	ENSG00000118873	RAB3GAP2	0	0	0	0	0.000634	0.077909	0	0.077909	0
TCONS_00019913	ENSG00000162885	B3GALNT2	0	0.001086	0.052366	0.010311	0	0.169517	0	0.169517	0
TCONS_00048050	ENSG00000185267	CDNF	0.0255	0.000198	0.007331	0.00422	0.000628	0.138862	0.005141	0.138862	0.019583
TCONS_00048109	ENSG00000148468	FAM171A1	0.001724	0	0	0.00659	0	0.068299	0	0.068299	0
TCONS_00042037	ENSG00000198964	SGMS1	0.003136	0.010677	0.008275	0	0.002601	0.115131	0.002798	0.115131	0
TCONS_00050583	ENSG00000204130	RUFY2	0	0	0.039908	0	0	0.150207	0.001548	0.150207	0
TCONS_00051179	ENSG00000156110	ADK	0	0	0	0	0	0.07606	0	0.07606	0
TCONS_00044858	ENSG00000107521	HPS1	0	0	0	0	0	0.016721	0	0.016721	0
TCONS_00053170	ENSG00000197748	CFAP43	0	0.015786	0	0	0	0.055066	0	0.055066	0.008879
TCONS_00053394	XLOC_022577	XLOC_022577	0	0	0	0.007782	0	0.271607	0	0.271607	0.11416
TCONS_00046904	ENSG00000132334	PTPRE	0	0	0	0	0	0.142226	0	0.142226	0
TCONS_00054960	ENSG00000142089	IFITM3	0	0	0.004371	0.007613	0	0.094293	0.004127	0.094293	0
TCONS_00066905	ENSG00000110628	SLC22A18	0.008305	0	0	0	0	0.016144	0	0.016144	0
TCONS_00055582	ENSG00000110619	CARS	0	0.033761	0	0	0	0.10532	0	0.10532	0
TCONS_00067208	ENSG00000167355	OR51B5	0	0	0	0	0	0.074528	0	0.074528	0.008963
TCONS_00067717	ENSG00000166444	ST5	0.006793	0	0.012726	0	0.007025	0.245528	0.008079	0.245528	0.027633
TCONS_00067790	XLOC_027773	XLOC_027773	0	0	0.014738	0	0	0.070977	0	0.070977	0
TCONS_00069159	ENSG00000148950	IMMP1L	0	0	0	0	0	0.140172	0	0.140172	0
TCONS_00074276	ENSG00000149256	TENM4	0.011831	0	0.00222	0	0	0.171638	0	0.171638	0.006006
TCONS_00064559	ENSG00000166682	TMPRSS5	0	0	0	0	0	0.062591	0	0.062591	0
TCONS_00077014	ENSG00000110400	NECTIN1	0	0.070544	0.006969	0	0	0.153225	0	0.153225	0
TCONS_00065316	ENSG00000149403	GRIK4	0	0	0	0	0	0.052874	0	0.052874	0
TCONS_00065458	ENSG00000023171	GRAMD1B	0.046913	0	0	0	0	0.258766	0	0.258766	0
TCONS_00077352	ENSG00000154134	ROBO3	0	0	0	0	0	0.099893	0	0.099893	0
TCONS_00077702	ENSG00000170325	PRDM10	0.001513	0	0.000562	0	0	0.145323	0	0.145323	0
TCONS_00078321	XLOC_031919	XLOC_031919	0	0	0	0	0	0.073747	0	0.073747	0.001513
TCONS_00080746	ENSG00000139132	FGD4	0.004531	0	0	0	0	0.016907	0	0.016907	0
TCONS_00081359	XLOC_033121	XLOC_033121	0	0	0	0	0	0.070604	0	0.070604	0
TCONS_00094673	ENSG00000198673	FAM19A2	0	0	0	0	0	0.118766	0.004936	0.118766	0
TCONS_00094674	ENSG00000198673	FAM19A2	0	0	0.00214	0	0.003467	0.1636	0.005447	0.1636	0
TCONS_00086554	ENSG00000139437	TCHP	0	0	0	0	0	0.189406	0	0.189406	0
TCONS_00088103	ENSG00000274874	AC068790.8	0.003333	0.008303	0.00674	0	0.003835	0.103785	0	0.103785	0
TCONS_00088266	ENSG00000139364	TMEM132B	0	0	0	0	0	0.100722	0	0.100722	0
TCONS_00104565	ENSG00000132938	MTUS2	0.010203	0	0	0	0	0.063943	0	0.063943	0
TCONS_00105091	XLOC_042560	XLOC_042560	0	0	0	0	0	0.029047	0	0.029047	0
TCONS_00107459	XLOC_043860	XLOC_043860	0	0	0.017064	0	0.017542	0.061879	0	0.061879	0
TCONS_00116561	XLOC_047323	XLOC_047323	0	0.001021	0.020868	0.00266	0	0.17236	0.027506	0.17236	0
TCONS_00119278	XLOC_048528	XLOC_048528	0	0.013374	0	0	0	0.252666	0	0.252666	0
TCONS_00123412	ENSG00000214013	GANC	0	0	0	0.003387	0	0.007538	0	0.007538	0
TCONS_00124267	ENSG00000138594	TMOD3	0	0	0	0	0.003883	0.125765	0	0.125765	0.012676
TCONS_00133410	ENSG00000136378	ADAMTS7	0	0	0	0	0	0.095758	0	0.095758	0
TCONS_00137242	ENSG00000188897	AC099489.1	0	0	0	0	0	0.127465	0	0.127465	0
TCONS_00138244	ENSG00000103319	EEF2K	0.003828	0.009284	0	0.015063	0	0.211312	0.004124	0.211312	0
TCONS_00138701	ENSG00000169180	XPO6	0	0	0	0	0	0.134144	0	0.134144	0
TCONS_00140256	ENSG00000177200	CHD9	0	0	0	0	0	0.004779	0	0.004779	0
TCONS_00149411	XLOC_058713	XLOC_058713	0	0	0	0	0	0.064778	0	0.064778	0
TCONS_00149748	ENSG00000159593	NAE1	0.008946	0	0	0	0.019668	0.081377	0	0.081377	0.007322
TCONS_00141272	XLOC_056349	XLOC_056349	0	0	0	0	0.01618	0.148235	0	0.148235	0.020178
TCONS_00141608	ENSG00000102904	TSNAXIP1	0	0	0	0	0	0.514386	0	0.514386	0
TCONS_00150213	ENSG00000184939	ZFP90	0	0	0	0	0	0.018445	0	0.018445	0
TCONS_00143218	XLOC_056878	XLOC_056878	0	0.0036	0.001678	0	0.014189	0.183357	0	0.183357	0
TCONS_00165834	ENSG00000205212	CCDC144NL	0	0	0	0	0	0.002888	0	0.002888	0
TCONS_00158630	ENSG00000182742	HOXB4	0	0.016312	0	0.001397	0	0.215486	0	0.215486	0.001315
TCONS_00159560	ENSG00000180891	CUEDC1	0	0	0	0	0	0.070128	0	0.070128	0
TCONS_00161901	XLOC_062710	XLOC_062710	0	0	0.004296	0	0	0.059518	0	0.059518	0
TCONS_00174458	ENSG00000101680	LAMA1	0	0	0	0	0	0.039675	0	0.039675	0
TCONS_00178456	ENSG00000154864	PIEZO2	0.002796	0.0029	0.006102	0.004272	0.001447	0.117131	0.002814	0.117131	0.001418
TCONS_00179577	ENSG00000075643	MOCOS	0	0	0	0.008966	0	0.088148	0	0.088148	0
TCONS_00176931	ENSG00000081923	ATP8B1	0	0	0	0	0	0.000138	0	0.000138	0
TCONS_00181875	ENSG00000141759	TXNL4A	0	0	0	0	0	0.06083	0	0.06083	0
TCONS_00183339	ENSG00000125730	C3	0	0	0	0	0	0.174485	0	0.174485	0
TCONS_00198343	XLOC_074776	XLOC_074776	0.009664	0	0.012001	0	0	0.07706	0	0.07706	0
TCONS_00198453	ENSG00000161249	DMKN	0	0	0	0	0	0.0008	0	0.0008	0
TCONS_00189736	ENSG00000007255	TRAPPC6A	0	0	0.01297	0	0.008873	0.094701	0	0.094701	0
TCONS_00189898	ENSG00000125755	SYMPK	0	0	0	0	0	0.041534	0	0.041534	0
TCONS_00220208	XLOC_083081	XLOC_083081	0	0	0.00481	0	0	0.10623	0	0.10623	0
TCONS_00221530	XLOC_083666	XLOC_083666	0	0	0.018478	0	0	0.058307	0	0.058307	0
TCONS_00222520	ENSG00000115239	ASB3	0	0	0	0	0	0.037015	0	0.037015	0
TCONS_00224273	XLOC_084691	XLOC_084691	0	0	0	0	0	0.025775	0	0.025775	0
TCONS_00208744	XLOC_078335	XLOC_078335	0	0	0	0	0	0.003375	0	0.003375	0
TCONS_00225669	ENSG00000075568	TMEM131	0	0	0	0	0	0.102094	0	0.102094	0.045249
TCONS_00211158	XLOC_079376	XLOC_079376	0	0	0	0	0	0.073802	0	0.073802	0
TCONS_00212584	ENSG00000144227	NXPH2	0	0	0	0	0	0.114697	0.022158	0.114697	0.029711
TCONS_00212974	ENSG00000150556	LYPD6B	0	0	0	0	0	0.005742	0	0.005742	0.002741
TCONS_00228875	XLOC_086948	XLOC_086948	0	0	0	0	0	0.006035	0	0.006035	0
TCONS_00228986	ENSG00000115165	CYTIP	0	0	0	0	0	0.003757	0	0.003757	0
TCONS_00229099	ENSG00000115183	TANC1	0	0	0	0	0	0.019553	0	0.019553	0
TCONS_00230514	ENSG00000188452	CERKL	0	0	0	0	0	0.04569	0.006757	0.04569	0
TCONS_00214922	XLOC_081068	XLOC_081068	0	0	0	0	0	0.071318	0	0.071318	0
TCONS_00231518	ENSG00000155729	KCTD18	0.01735	0.002222	0.008939	0	0	0.17519	0.011129	0.17519	0.030437
TCONS_00231926	XLOC_088176	XLOC_088176	0	0	0	0	0	0.067918	0	0.067918	0
TCONS_00232561	ENSG00000079308	TNS1	0	0	0	0	0	0.004816	0	0.004816	0
TCONS_00217371	XLOC_082000	XLOC_082000	0.000476	0	0	0	0	0.072929	0.000777	0.072929	0.010286
TCONS_00217382	XLOC_082008	XLOC_082008	0.009728	0	0.006084	0	0	0.091569	0	0.091569	0
TCONS_00233055	XLOC_088624	XLOC_088624	0	0	0	0	0	0.019885	0	0.019885	0
TCONS_00217815	ENSG00000187957	DNER	0	0.035889	0	0	0	0.084726	0	0.084726	0
TCONS_00219019	ENSG00000162804	SNED1	0	0	0	0	0	0.100317	0	0.100317	0
TCONS_00235205	ENSG00000149346	SLX4IP	0	0	0	0	0	0.098836	0.013585	0.098836	0.016319
TCONS_00243708	ENSG00000179242	CDH4	0.009208	0	0	0	0	0.117776	0	0.117776	0.027251
TCONS_00243707	ENSG00000179242	CDH4	0	0	0	0.003851	0.000429	0.149613	0.010444	0.149613	0.001525
TCONS_00239206	ENSG00000196421	C20orf204	0	0.038443	0	0.009032	0	0.114778	0	0.114778	0
TCONS_00246177	XLOC_094421	XLOC_094421	0	0.002682	0	0.002249	0.009557	0.076688	0.001726	0.076688	0
TCONS_00256461	XLOC_098472	XLOC_098472	0	0	0	0	0	0.115295	0	0.115295	0
TCONS_00256735	ENSG00000133466	C1QTNF6	0	0	0	0	0	0.007032	0	0.007032	0
TCONS_00252479	ENSG00000166897	ELFN2	0	0	0	0	0	0.028568	0	0.028568	0
TCONS_00252486	XLOC_097050	XLOC_097050	0	0	0.022632	0	0.005618	0.122098	0.009141	0.122098	0.023429
TCONS_00256707	XLOC_098573	XLOC_098573	0	0	0	0	0	0.097593	0	0.097593	0
TCONS_00258441	ENSG00000175928	LRRN1	0.000105	6.5e-05	4.6e-05	0.000181	0	0.002033	9e-05	0.002033	0.0002
TCONS_00260297	ENSG00000170293	CMTM8	0.008519	0.000128	0	0	0	0.088603	0	0.088603	0
TCONS_00273268	XLOC_104985	XLOC_104985	0	0.012101	0	0.004136	0.015194	0.062821	0	0.062821	0
TCONS_00262638	ENSG00000010318	PHF7	0	0	0	0	0	0.145869	0	0.145869	0
TCONS_00264331	XLOC_101251	XLOC_101251	0.085146	0	0	0	0	0.148427	0	0.148427	0.000202
TCONS_00264402	ENSG00000064225	ST3GAL6	0	0	0	0	0	0.407813	0	0.407813	0
TCONS_00277892	XLOC_106849	XLOC_106849	0	0	0	0	0	0.017576	0	0.017576	0
TCONS_00279822	ENSG00000163710	PCOLCE2	0	0	0	0	0	0.076381	0.006351	0.076381	0
TCONS_00279966	XLOC_107684	XLOC_107684	0	0	0	0	0	0.130648	0	0.130648	0
TCONS_00280481	XLOC_107944	XLOC_107944	0	0	0	0	0	0.019957	0	0.019957	0
TCONS_00268922	ENSG00000169760	NLGN1	0	0	0	0	0	0.077227	0	0.077227	0
TCONS_00281959	ENSG00000145198	VWA5B2	0	0	0	0	0	0.089456	0	0.089456	0
TCONS_00282495	ENSG00000127249	ATP13A4	0	0	0	0	0.002204	0.052784	0	0.052784	0
TCONS_00292097	ENSG00000159674	SPON2	0	0.000822	0	0	0	0.017515	0.004719	0.017515	0
TCONS_00293981	ENSG00000174125	TLR1	0	0	0	0	0.002944	0.013887	0	0.013887	0
TCONS_00294241	XLOC_114197	XLOC_114197	0.019606	0	0	0	0	0.104466	0	0.104466	0
TCONS_00286328	ENSG00000109265	KIAA1211	0.002616	0	0	0	0	0.053387	0	0.053387	0.022796
TCONS_00295250	ENSG00000171234	UGT2B7	0	0	0.000838	0	0	0.018786	0.000732	0.018786	0
TCONS_00297354	ENSG00000188517	COL25A1	0	0	0	0	0.004833	0.082244	0.003066	0.082244	0
TCONS_00297691	ENSG00000164100	NDST3	0	0	0	0	0	0.068573	0	0.068573	0
TCONS_00289246	ENSG00000164074	ABHD18	0.000388	0	0	0	0.000292	0.025449	0.000297	0.025449	0
TCONS_00299195	XLOC_116352	XLOC_116352	0	0	0	0	0	0.005443	0	0.005443	0
TCONS_00291539	XLOC_112859	XLOC_112859	0	0	0	0	0	0.071318	0	0.071318	0
TCONS_00300888	XLOC_117222	XLOC_117222	0	0	0.013469	0	0	0.111956	0	0.111956	0
TCONS_00313134	ENSG00000113494	PRLR	0	0	0.002342	0	0	0.103005	0	0.103005	0
TCONS_00314731	XLOC_123776	XLOC_123776	0	0	0	0	0	0.08062	0	0.08062	0
TCONS_00303658	ENSG00000069020	MAST4	0	0	0	0	0	0.0047	0	0.0047	0
TCONS_00304554	ENSG00000284762	AC022414.1	0	0	0	0	0	0.002019	0	0.002019	0
TCONS_00316778	XLOC_124749	XLOC_124749	0	0.004373	0	0	0	0.050853	0.000691	0.050853	0.01741
TCONS_00307176	XLOC_120398	XLOC_120398	0	0	0	0	0	0.099336	0	0.099336	0
TCONS_00319560	XLOC_126088	XLOC_126088	0.023424	0	0	0	0	0.073365	0	0.073365	0
TCONS_00308674	XLOC_120908	XLOC_120908	0	0.003865	0	0.003307	0	0.08464	0	0.08464	0.000491
TCONS_00319602	XLOC_126098	XLOC_126098	0	0	0	0	0	0.041334	0	0.041334	0
TCONS_00319681	ENSG00000186314	PRELID2	0	0.003777	0	0	0	0.143167	0	0.143167	0
TCONS_00309059	ENSG00000113721	PDGFRB	0	0	0	0	0	0.067022	0	0.067022	0
TCONS_00333262	XLOC_132660	XLOC_132660	0	0.018598	0	0	0	0.083568	0	0.083568	0
TCONS_00325697	ENSG00000197283	SYNGAP1	0	0	0	0	0	0.136337	0	0.136337	0
TCONS_00336521	ENSG00000023892	DEF6	0	0	0	0	0	0.121095	0	0.121095	0
TCONS_00325913	ENSG00000112033	PPARD	0	0	0	0	0	0.153668	0	0.153668	0
TCONS_00328556	ENSG00000118420	UBE3D	0.016305	0	0	0.006139	0.013077	0.071725	0	0.071725	0
TCONS_00329951	ENSG00000281613	AL365214.3	0	0	0	0	0	0.004277	0	0.004277	0
TCONS_00342320	XLOC_136999	XLOC_136999	0.055828	0	0	0.018867	0	0.134966	0	0.134966	0
TCONS_00331729	XLOC_131961	XLOC_131961	0	0	0	0	0	0.027164	0	0.027164	0
TCONS_00342539	XLOC_137107	XLOC_137107	0	0	0	0	0	0.003776	0	0.003776	0
TCONS_00342614	XLOC_137153	XLOC_137153	0	0	0	0	0	0.062914	0	0.062914	0
TCONS_00356609	ENSG00000122515	ZMIZ2	0	0	0	0	0	0.175059	0.047478	0.175059	0
TCONS_00356782	XLOC_143009	XLOC_143009	0	0	0	0	0	0.058206	0	0.058206	0.026608
TCONS_00359901	ENSG00000185955	C7orf61	0	0.010945	0.011461	0.013362	0	0.258138	0	0.258138	0
TCONS_00360210	ENSG00000128563	PRKRIP1	0	0	0	0	0	0.394748	0	0.394748	0
TCONS_00351305	ENSG00000179603	GRM8	0	0	0	0	0	0.455206	0	0.455206	0
TCONS_00361445	ENSG00000179603	GRM8	0	0	0	0	0	0.059593	0	0.059593	0
TCONS_00362285	ENSG00000157741	UBN2	0	0	0	0	0	0.12297	0	0.12297	0
TCONS_00352337	ENSG00000059377	TBXAS1	0	0	0	0	0	0.006113	0	0.006113	0
TCONS_00363247	ENSG00000106617	PRKAG2	0.054639	0.036849	0	0	0	0.255993	0	0.255993	0.037159
TCONS_00363482	XLOC_145688	XLOC_145688	0	0	0	0	0	0.069574	0	0.069574	0
TCONS_00365556	ENSG00000197892	KIF13B	0	0	0	0	0	0.071342	0	0.071342	0
TCONS_00366720	XLOC_146980	XLOC_146980	0	0	0	0	0	0.06394	0	0.06394	0.019147
TCONS_00367659	XLOC_147462	XLOC_147462	0	0	0	0	0	0.030569	0.003037	0.030569	0
TCONS_00376035	XLOC_151444	XLOC_151444	0	0	0	0	0.023593	0.265974	0.042353	0.265974	0.004955
TCONS_00378331	ENSG00000177570	SAMD12	0.109889	0	0	0	0	0.247663	0	0.247663	0
TCONS_00370181	ENSG00000178764	ZHX2	0.019413	0	0	7.9e-05	0	0.211018	0	0.211018	0
TCONS_00370865	ENSG00000066827	ZFAT	0	0	0	0	0	0.052269	0	0.052269	0
TCONS_00379664	XLOC_153142	XLOC_153142	0	0	0	0	0	0.076917	0	0.076917	0
TCONS_00381077	XLOC_153602	XLOC_153602	0	0	0	0	0	0.062352	0	0.062352	0.020365
TCONS_00389987	ENSG00000198642	KLHL9	0	0	0	0	0	0.142308	0	0.142308	0
TCONS_00382140	XLOC_154292	XLOC_154292	0	0	0.007185	0.00507	0	0.036454	0	0.036454	0
TCONS_00391060	ENSG00000198853	RUSC2	0	0	0	0.004635	0	0.059989	0	0.059989	0
TCONS_00391433	XLOC_158524	XLOC_158524	0	0	0	0	0	0.065783	0	0.065783	0
TCONS_00391889	XLOC_158788	XLOC_158788	0.037696	0	0	0	0	0.110732	0	0.110732	0
TCONS_00405215	XLOC_165197	XLOC_165197	0	0	0	0	0	0.086435	0	0.086435	0.038298
TCONS_00405267	ENSG00000086712	TXLNG	0.000677	0.019947	0	0	0	0.056533	0.000805	0.056533	0
TCONS_00398367	ENSG00000184368	MAP7D2	0	0	0.026727	0	0	0.126248	0	0.126248	0
TCONS_00405606	XLOC_165380	XLOC_165380	0	0	0	0	0	0.079469	0	0.079469	0
TCONS_00406864	XLOC_166017	XLOC_166017	0	0	0.040614	0	0	0.206623	0	0.206623	0
TCONS_00409645	XLOC_167505	XLOC_167505	0	0	0	0	0	0.028527	0	0.028527	0
TCONS_00403173	ENSG00000156500	FAM122C	0	0.012072	0.014237	0	0.003986	0.069705	0	0.069705	0.005193
TCONS_00403446	ENSG00000182195	LDOC1	0	0	0	0	0	0.097926	0	0.097926	0
TCONS_00403487	XLOC_164430	XLOC_164430	0	0	0	0	0	0.027087	0	0.027087	0
TCONS_00403606	XLOC_164506	XLOC_164506	0	0	0	0	0	0.068677	0	0.068677	0
TCONS_00000146	XLOC_000100	XLOC_000100	0.038041	0	0	0	0.028864	0.143476	0	0.143476	0
TCONS_00000207	XLOC_000146	XLOC_000146	0	0	0	0.067183	0.021004	0.164188	0	0.164188	0
TCONS_00000166	XLOC_000112	XLOC_000112	0	0	0	0	0	0.103459	0	0.103459	0
TCONS_00000506	XLOC_000365	XLOC_000365	0	0	0	0	0	0.016947	0	0.016947	0.00466
TCONS_00000797	XLOC_000608	XLOC_000608	0.162718	0.043671	0.079077	0.047132	0.033578	6.282	0.048449	6.282	0.030795
TCONS_00000282	XLOC_000190	XLOC_000190	0	0	0	0	0	0.185011	0	0.185011	0
TCONS_00003691	XLOC_001680	XLOC_001680	0	0	0	0	0	0.063948	0	0.063948	0
TCONS_00004456	XLOC_002026	XLOC_002026	0	0	0	0	0	0.095499	0	0.095499	0
TCONS_00005860	XLOC_002547	XLOC_002547	0	0	0	0	0	0.103932	0	0.103932	0
TCONS_00010082	XLOC_004159	XLOC_004159	0	0	0	0	0	0.064217	0	0.064217	0
TCONS_00038214	XLOC_015585	XLOC_015585	0	0	0	0	0	0.089723	0	0.089723	0
TCONS_00047431	XLOC_019843	XLOC_019843	0	0	0	0	0	0.086581	0	0.086581	0
TCONS_00048759	XLOC_020463	XLOC_020463	0	0	0	0	0	0.075428	0	0.075428	0
TCONS_00041588	XLOC_017214	XLOC_017214	0	0	0	0.039588	0	0.083093	0	0.083093	0
TCONS_00050015	XLOC_021036	XLOC_021036	0	0	0	0	0	0.09579	0	0.09579	0
TCONS_00043750	XLOC_018170	XLOC_018170	0	0	0	0	0	0.009844	0	0.009844	0
TCONS_00052151	XLOC_022125	XLOC_022125	0	0	0	0	0	0.078277	0	0.078277	0.024356
TCONS_00045751	XLOC_019060	XLOC_019060	0	0	0	0	0	0.134856	0	0.134856	0
TCONS_00077585	XLOC_031654	XLOC_031654	0	0	0	0	0	0.169768	0	0.169768	0
TCONS_00081363	XLOC_033124	XLOC_033124	0	0	0	0	0	0.087884	0	0.087884	0
TCONS_00081502	XLOC_033173	XLOC_033173	0	0	0	0	0	0.065535	0	0.065535	0
TCONS_00088159	XLOC_035573	XLOC_035573	0	0	0	0	0	0.076352	0	0.076352	0
TCONS_00100308	XLOC_040200	XLOC_040200	0	0	0	0	0	0.151369	0.025737	0.151369	0
TCONS_00100887	XLOC_040494	XLOC_040494	0	0	0	0	0	0.020546	0	0.020546	0
TCONS_00100893	XLOC_040500	XLOC_040500	0	0	0	0	0	0.009913	0	0.009913	0
TCONS_00101436	XLOC_040753	XLOC_040753	0	0	0	0	0	0.093492	0	0.093492	0
TCONS_00106534	XLOC_043231	XLOC_043231	0	0	0	0	0	0.072955	0	0.072955	0
TCONS_00106625	XLOC_043307	XLOC_043307	0	0	0	0	0	0.086919	0	0.086919	0
TCONS_00117646	XLOC_047842	XLOC_047842	0	0	0	0	0	0.081988	0	0.081988	0
TCONS_00130539	XLOC_052908	XLOC_052908	0	0	0	0	0	0.108675	0	0.108675	0
TCONS_00136921	ENSG00000078328	RBFOX1	0	0	0	0	0	0.002648	0	0.002648	0
TCONS_00142915	XLOC_056780	XLOC_056780	0	0	0	0	0	0.068255	0	0.068255	0
TCONS_00176482	XLOC_067441	XLOC_067441	0	0	0	0	0	0.094686	0	0.094686	0
TCONS_00177529	XLOC_067934	XLOC_067934	0	0	0	0	0	0.062068	0	0.062068	0
TCONS_00193495	XLOC_073276	XLOC_073276	0	0	0	0	0	0.078566	0	0.078566	0
TCONS_00185143	ENSG00000105122	RASAL3	0	0.017003	0	0	0	0.074675	0	0.074675	0
TCONS_00206422	XLOC_077310	XLOC_077310	0	0	0	0	0	0.13743	0.043707	0.13743	0
TCONS_00208725	XLOC_078322	XLOC_078322	0	0	0	0	0	0.066474	0	0.066474	0
TCONS_00210250	ENSG00000115590	IL1R2	0	0	0	0	0	0.047448	0	0.047448	0
TCONS_00212643	XLOC_080071	XLOC_080071	0	0	0	0	0	0.10516	0	0.10516	0
TCONS_00213221	XLOC_080316	XLOC_080316	0	0	0	0	0	0.007938	0	0.007938	0
TCONS_00234565	XLOC_089304	XLOC_089304	0	0	0	0	0	0.062857	0	0.062857	0
TCONS_00241107	XLOC_092123	XLOC_092123	0	0	0	0	0	0.068677	0	0.068677	0
TCONS_00241318	ENSG00000125999	BPIFB1	0	0	0	0	0	0.07201	0	0.07201	0
TCONS_00244476	XLOC_093612	XLOC_093612	0	0	0	0	0	0.108675	0	0.108675	0
TCONS_00247545	XLOC_094941	XLOC_094941	0	0	0	0	0	0.084351	0	0.084351	0
TCONS_00249767	XLOC_095967	XLOC_095967	0.022619	0	0	0	0	0.093087	0	0.093087	0
TCONS_00255650	XLOC_098212	XLOC_098212	0	0	0	0	0	0.091786	0	0.091786	0
TCONS_00259922	XLOC_099599	XLOC_099599	0	0	0	0	0	0.073195	0	0.073195	0
TCONS_00272871	XLOC_104812	XLOC_104812	0.012774	0	0	0	0	0.100231	0	0.100231	0
TCONS_00276593	XLOC_106134	XLOC_106134	0	0	0	0	0	0.080938	0	0.080938	0
TCONS_00280933	XLOC_108096	XLOC_108096	0	0	0	0	0	0.075943	0	0.075943	0
TCONS_00281070	XLOC_108194	XLOC_108194	0	0	0	0	0	0.06682	0	0.06682	0
TCONS_00293770	XLOC_113973	XLOC_113973	0	0	0	0	0	0.071663	0	0.071663	0
TCONS_00286487	XLOC_110426	XLOC_110426	0	0	0	0	0	0.081302	0	0.081302	0
TCONS_00295505	XLOC_114849	XLOC_114849	0	0	0	0	0	0.020952	0	0.020952	0
TCONS_00297315	XLOC_115474	XLOC_115474	0	0	0	0	0	0.121591	0	0.121591	0
TCONS_00297925	XLOC_115762	XLOC_115762	0.011685	0	0.003639	0	0	0.069884	0	0.069884	0
TCONS_00291765	XLOC_112971	XLOC_112971	0	0	0.036813	0	0	0.120603	0	0.120603	0
TCONS_00313191	XLOC_122992	XLOC_122992	0.018823	0	0	0	0	0.190012	0.015795	0.190012	0.024129
TCONS_00313509	XLOC_123109	XLOC_123109	0	0	0	0	0	0.159187	0	0.159187	0
TCONS_00302692	XLOC_118212	XLOC_118212	0	0	0	0	0	0.066798	0	0.066798	0.021195
TCONS_00303223	XLOC_118534	XLOC_118534	0	0	0	0	0	0.066224	0	0.066224	0
TCONS_00315672	XLOC_124205	XLOC_124205	0	0	0	0	0	0.079008	0	0.079008	0
TCONS_00305928	XLOC_119758	XLOC_119758	0	0	0	0	0	0.070639	0	0.070639	0
TCONS_00316971	XLOC_124876	XLOC_124876	0	0	0	0	0	0.119805	0	0.119805	0
TCONS_00317222	XLOC_125021	XLOC_125021	0	0	0.023669	0	0	0.073065	0	0.073065	0
TCONS_00308702	XLOC_120938	XLOC_120938	0	0	0	0	0	0.089308	0	0.089308	0
TCONS_00309528	ENSG00000113249	HAVCR1	0	0	0	0	0	0.072831	0	0.072831	0
TCONS_00309918	XLOC_121441	XLOC_121441	0	0	0	0	0	0.117731	0	0.117731	0
TCONS_00327140	ENSG00000112116	IL17F	0	0	0	0	0	0.06682	0	0.06682	0
TCONS_00327444	XLOC_129463	XLOC_129463	0	0	0	0	0	0.089209	0	0.089209	0
TCONS_00339785	XLOC_135793	XLOC_135793	0	0	0	0	0	0.062068	0	0.062068	0
TCONS_00330581	XLOC_131393	XLOC_131393	0	0	0	0	0	0.067736	0	0.067736	0
TCONS_00342852	XLOC_137258	XLOC_137258	0	0	0	0	0	0.06938	0	0.06938	0
TCONS_00353876	XLOC_141786	XLOC_141786	0	0	0	0	0	0.089826	0	0.089826	0
TCONS_00354070	XLOC_141844	XLOC_141844	0	0	0.018273	0	0	0.076728	0	0.076728	0
TCONS_00356196	XLOC_142807	XLOC_142807	0	0	0	0	0	0.116194	0	0.116194	0
TCONS_00347959	XLOC_139542	XLOC_139542	0	0	0	0	0	0.064637	0	0.064637	0
TCONS_00363606	XLOC_145741	XLOC_145741	0	0	0	0	0	0.098023	0	0.098023	0
TCONS_00374664	XLOC_150717	XLOC_150717	0	0	0	0	0	0.073652	0	0.073652	0
TCONS_00368146	XLOC_147730	XLOC_147730	0	0	0	0	0	0.064969	0	0.064969	0
TCONS_00378073	XLOC_152428	XLOC_152428	0	0	0	0	0	0.117465	0	0.117465	0
TCONS_00389136	XLOC_157318	XLOC_157318	0	0	0.010727	0	0	0.11238	0	0.11238	0
TCONS_00385438	XLOC_155906	XLOC_155906	0	0	0.020627	0	0	0.095031	0	0.095031	0
TCONS_00394074	XLOC_159914	XLOC_159914	0	0	0	0	0	0.083723	0	0.083723	0
TCONS_00409380	XLOC_167339	XLOC_167339	0	0	0.028985	0	0	0.064778	0	0.064778	0
TCONS_00403014	XLOC_164207	XLOC_164207	0	0	0	0	0	0.099893	0	0.099893	0
TCONS_00410684	XLOC_168137	XLOC_168137	0	0	0	0	0	0.092123	0	0.092123	0
TCONS_00411747	XLOC_168557	XLOC_168557	0	0	0	0	0	0.029087	0	0.029087	0
TCONS_00000380	XLOC_000263	XLOC_000263	0	0	0	0	0	0.072344	0	0.072344	0

## Sheet: lncRNA_UV_cluster 7
transcript_id	gene_id	gene_name	C_0	UV_3	UV_6	UV_9	UV_12	UV_24	UV_48	UV_24	UV_96
ENST00000449660	ENSG00000238164	TNFRSF14-AS1	0	0	0	0	0	0	0.001546	0	0
ENST00000443892	ENSG00000238164	TNFRSF14-AS1	0	0	0	0	0	0	0.007466	0	0
ENST00000439488	ENSG00000236423	LINC01134	0.0094	0	0.004859	0	0.004755	0	0.051931	0	0
ENST00000411708	ENSG00000237728	Z97987.1	0	0	0	0	0	0	0.011985	0	0
ENST00000633763	ENSG00000282143	AL137798.2	0	0	0	0.001361	0	0	0.069585	0	0
ENST00000635288	ENSG00000223382	LINC01778	0	0.000343	0	0	0	0	0.012273	0	0
ENST00000634319	ENSG00000223382	LINC01778	0	0	0	0	0	0	0.030012	0	0
ENST00000630229	ENSG00000225313	AL513327.1	0	0	0	0	0	0	0.007254	0	0
ENST00000579043	ENSG00000264592	RN7SL131P	0	0	0	0	0	0	0.011105	0	0
ENST00000648746	ENSG00000285905	AL033527.6	0	0	0	0	0	0	0.003116	0	0
ENST00000623663	ENSG00000280425	AL357673.2	0	0	0	0	0	0	0.003772	0	0
ENST00000641177	ENSG00000260971	AC119674.1	0	0	0	0	0	0	0.003381	0	0
ENST00000634701	ENSG00000231252	AC099792.1	0	0	0	0	0	0	0.003644	0	0
ENST00000456587	ENSG00000236915	CLCA4-AS1	0	0	0	0	0	0	0.001915	0	0
ENST00000650379	ENSG00000236915	CLCA4-AS1	0	0	0	0	0	0	0.005437	0	0
ENST00000648946	ENSG00000285525	AC099670.3	0	0	0	0	0	0	0.026512	0	0.007528
ENST00000432294	ENSG00000241073	AC093019.2	0	0	0	0	0	0	0.009514	0	0
ENST00000414923	ENSG00000230759	AC095032.2	0	0	0	0	0	0	0.022421	0	0
ENST00000440689	ENSG00000232811	AL360270.1	0	0	0	0	0	0	0.004798	0	0
ENST00000434879	ENSG00000233154	LINC01762	0	0	0	0	0	0	0.008714	0	0
ENST00000614062	ENSG00000226067	LINC00623	0	0	0	0	0	0	0.010991	0	0.000858
ENST00000443018	ENSG00000232721	AC239800.2	0	0	0	0	0	0	0.003504	0	0
ENST00000441613	ENSG00000229780	UBE2Q1-AS1	0	0.003823	0.007205	0	0	0	0.025026	0	0
ENST00000442358	ENSG00000231666	LINC01704	0	0	0	0	0	0	0.099597	0	0
ENST00000528689	ENSG00000232995	AL592435.1	0	0	0	0	0	0	0.000371	0	0
ENST00000455124	ENSG00000231424	AL445673.1	0.000189	0	0	5.7e-05	0	0	0.091566	0	0
ENST00000419983	ENSG00000227373	AL121983.2	0	0	0	0	0	0	0.002944	0	0
ENST00000566904	ENSG00000261817	AL390718.1	0	0	0	0.00132	0	0	0.020174	0	0
ENST00000451829	ENSG00000227554	AL590422.1	0	0	0	0	0	0	0.010299	0	0
ENST00000614505	ENSG00000230426	ERVMER61-1	0.003527	0.01253	0.000545	0	0	0.00664	0.073193	0.00664	0.006655
ENST00000436905	ENSG00000237457	LINC01351	0	0	0	0	0.028406	0	0.040759	0	0
ENST00000434300	ENSG00000285280	AL390957.1	0.010759	0	0	0	0	0	0.034227	0	0
ENST00000452024	ENSG00000228792	AL356310.1	0	0	0	0	0	0	0.096124	0	0.012316
ENST00000443448	ENSG00000226251	LINC02608	0	0.003138	0	0.003115	0	0	0.134027	0	0.003136
ENST00000412221	ENSG00000226251	LINC02608	0	0	0	0	0	0	0.009516	0	0
ENST00000431347	ENSG00000238078	LINC01352	0	0	0	0	0	0	0.008671	0	0
ENST00000412445	ENSG00000238042	LINC02257	0.003213	0.015423	0	0	0	0.006566	0.040622	0.006566	0
ENST00000439440	ENSG00000228106	AL392172.1	0	0	0	0	0	0	0.005139	0	0
ENST00000431691	ENSG00000229400	AL596330.1	0	0	0	0	0	0	0.011197	0	0
ENST00000651771	ENSG00000234476	AC092811.1	0.007778	0	0	0	0	0.007322	0.046947	0.007322	0.00636
ENST00000496552	ENSG00000203684	IBA57-DT	0	0	0	0	0	0	0.024635	0	0
ENST00000412344	ENSG00000244137	AL512328.1	0	0	0	0	0	0	0.010579	0	0
ENST00000450451	ENSG00000237250	AL359924.1	0	0	0	0	0	0	0.002977	0	0
ENST00000435531	ENSG00000229869	AL359878.2	0	0	0	0	0	0	0.038186	0	0
ENST00000448685	ENSG00000232807	AL137186.2	0	0.001738	0	0	0	0	0.036753	0	0
ENST00000457632	ENSG00000234248	AL392086.1	0	0	0	0	0	0	0.016044	0	0.000201
ENST00000634899	ENSG00000225383	SFTA1P	0.006609	0.00494	0.003964	0.002842	0.003663	0.006796	0.08785	0.006796	0.010968
ENST00000451617	ENSG00000235410	AL157896.1	0	0	0	0	0	0	0.002911	0	0
ENST00000445235	ENSG00000229190	AC069542.1	0	0	0	0	0	0	0.007081	0	0
ENST00000420945	ENSG00000223834	AL161935.1	0.018322	0	0	0	0	0	0.044672	0	0
ENST00000596743	ENSG00000228065	LINC01515	0.002842	3e-06	9.3e-05	8.3e-05	8e-06	7e-06	0.041106	7e-06	0.000111
ENST00000649714	ENSG00000226051	ZNF503-AS1	0	0	0	0	0	0	0.013141	0	0
ENST00000426234	ENSG00000236467	KCNMA1-AS1	0	0	0	0	0	0	0.002449	0	0
ENST00000609363	ENSG00000273413	AL136982.7	0	0	0	0	0	0	0.025979	0	0
ENST00000451733	ENSG00000232936	AL157400.2	0	0	0	0	0	0	0.00013	0	0
ENST00000568017	ENSG00000260461	AL133355.1	0.003422	0.005204	0.000772	0	0.000483	0.002206	0.046273	0.002206	0.002649
ENST00000616367	ENSG00000277371	RF00017	0	0	0	0	0	0	0.023043	0	0
ENST00000450206	ENSG00000234311	AL451069.3	0	0	0	0	0.018213	0	0.046259	0	0
ENST00000481676	ENSG00000243562	RN7SL838P	0	0	0	0	0	0	0.009001	0	0
ENST00000530169	ENSG00000251364	AC107884.1	0	0	0	0	0	0	0.033757	0	0
ENST00000532930	ENSG00000255159	AC026894.1	0	0	0	0	0	0	0.022052	0	0
ENST00000534477	ENSG00000251381	LINC00958	0	0	0	0	0	0	0.053336	0	0.022388
ENST00000534036	ENSG00000254542	NAV2-AS3	0	0	0	0	0	0	0.028299	0	0
ENST00000525641	ENSG00000255109	AC090458.1	0	0	0	0	0	0	0.010959	0	0.0036
ENST00000528765	ENSG00000246250	AC087521.2	0	0	0	0	0	0	0.019272	0	0
ENST00000527426	ENSG00000255197	AC090559.1	0	0	0	0	0	0	0.014079	0	0
ENST00000545474	ENSG00000256746	AC018410.1	0	0	0	0	0	0	0.019049	0	0
ENST00000244906	ENSG00000124915	AP002380.1	0	0	0	0	0	0	0.004516	0	0
ENST00000543624	ENSG00000257002	AP000438.1	0	0	0	0	0	0	0.023378	0	0
ENST00000616527	ENSG00000251562	MALAT1	0	0	0	0	0	0	0.02522	0	0
ENST00000616691	ENSG00000251562	MALAT1	0.002219	0.002699	0.000161	0	0.002419	8.9e-05	0.01235	8.9e-05	0
ENST00000527440	ENSG00000254885	AP001547.1	0	0	0	0	0	0	0.043824	0	0
ENST00000532217	ENSG00000245832	MIR4300HG	0	0	0	0	0	0	0.005789	0	0.001386
ENST00000527364	ENSG00000255246	AP000793.1	0	0	0	0	0	0	0.003997	0	0
ENST00000531994	ENSG00000255082	GRM5-AS1	0	0	0	0.017912	0	0	0.028529	0	0
ENST00000438416	ENSG00000233536	AP000943.1	0	0	0	0	0	0	0.008562	0	0
ENST00000540692	ENSG00000245552	AP000787.1	0	0	0	0	0.008312	0	0.042341	0	0.000271
ENST00000526487	ENSG00000255129	AP000880.1	0.019693	0	0	0.017733	0	0	0.088498	0	0
ENST00000532168	ENSG00000250303	AP002884.1	0	0	0	0	0	0	0.081389	0	0
ENST00000534904	ENSG00000256195	AP002518.1	0	0	0	0	0	0	0.004885	0	0
ENST00000646572	ENSG00000255422	AP002954.1	0	0	0	0	0	0	0.051214	0	0.015749
ENST00000498872	ENSG00000245869	AP004609.1	0	0	0	0.00207	0	0	0.005694	0	0
ENST00000649115	ENSG00000273415	AP000904.1	0	0	0	0	0	0	0.011168	0	0
ENST00000537514	ENSG00000177406	AC021054.1	0.00025	0	0	3.1e-05	0	5.3e-05	0.009219	5.3e-05	4.6e-05
ENST00000539009	ENSG00000256288	LINC02617	0	0	0.014239	0	0	0.017143	0.060074	0.017143	0
ENST00000499948	ENSG00000247498	GPRC5D-AS1	0.000206	0.003168	0	0.001729	0	0.001921	0.027323	0.001921	0.000715
ENST00000539026	ENSG00000180861	LINC01559	0	0	0	0	0	0	0.05005	0	0
ENST00000444324	ENSG00000256339	AC007655.1	0.006768	0	0	0	0	0	0.040486	0	0
ENST00000536949	ENSG00000256686	AC019209.3	0	0	0	0	0	0	0.011447	0	0
ENST00000535324	ENSG00000255968	AC024145.1	0	0	0	0	0	0	0.011354	0	0
ENST00000414098	ENSG00000234428	AC023051.1	0	0	0	0	0	0	0.010699	0	0
ENST00000550906	ENSG00000257599	OVCH1-AS1	0	0	0	0	0	0	0.022069	0	0
ENST00000500076	ENSG00000246331	AC010198.1	0	0.003339	0	0	0	0.004779	0.017467	0.004779	0
ENST00000500527	ENSG00000245614	DDX11-AS1	0	0	0	0	0	0.269905	0.527521	0.269905	0
ENST00000551021	ENSG00000257261	AC008014.1	0.002947	0.001427	0.00182	0.000478	0.003202	0.002402	0.026244	0.002402	0.00036
ENST00000615076	ENSG00000276454	AC008083.3	0	0	0	0	0	0	0.004011	0	0
ENST00000614647	ENSG00000274156	AC008121.2	0.037112	0	0.002827	0	0	0.008509	0.091212	0.008509	0
ENST00000504278	ENSG00000250432	FAM242C	0	0	0	0	0	0	0.019975	0	0
ENST00000505661	ENSG00000250432	FAM242C	0	0.02929	0	0	0	0	0.062044	0	0
ENST00000548955	ENSG00000245651	AC083805.1	0	0	0	0	0	0	0.014507	0	0
ENST00000540875	ENSG00000256915	AC090023.2	0	0	0	0	0	0	0.0104	0	0
ENST00000500695	ENSG00000247363	AC090061.1	0	0	0	0	0	0	0.030059	0	0
ENST00000549527	ENSG00000257894	AC027288.3	0.000364	0	0	0	0	0	0.014595	0	0
ENST00000548469	ENSG00000258044	AC073569.1	0	0	0	0	0	0	0.00728	0	0
ENST00000547094	ENSG00000257725	LINC02399	0	0	0	0	0	0	0.017182	0	0
ENST00000552835	ENSG00000257252	AC124947.1	0	0	0	0	0	0	0.018174	0	0
ENST00000535921	ENSG00000256609	AC084880.3	0	0	0	0	0	0	0.013982	0	0
ENST00000537366	ENSG00000248636	AC002070.1	0	0.016941	0	0	0	0	0.040425	0	0
ENST00000539078	ENSG00000255992	AC131009.1	0	0	0	0	0	0	0.024195	0	0
ENST00000542763	ENSG00000256955	AC131009.2	0	0	0	0	0.01198	0	0.048199	0	0.008013
ENST00000615947	ENSG00000215483	LINC00598	0	0	0	0	0	0	0.002647	0	0
ENST00000490496	ENSG00000240767	RN7SL288P	0	0	0	0	0	0	0.022437	0	0
ENST00000649910	ENSG00000231817	LINC01198	0	0	0	0	0	0	0.015634	0	0.000559
ENST00000624622	ENSG00000235903	CPB2-AS1	0	0	0.006971	0	0.00232	0	0.014139	0	0
ENST00000631080	ENSG00000233672	RNASEH2B-AS1	0	0	0	0	0	0	0.005069	0	0
ENST00000647901	ENSG00000235660	LINC00345	0	0	0	0	0	0	0.004176	0	0
ENST00000454752	ENSG00000224356	AL356966.1	0	0	0	0	0	0.000699	0.007919	0.000699	0
ENST00000646480	ENSG00000284966	AL138689.2	0.001315	0	0	0	0	0	0.003127	0	0
ENST00000617298	ENSG00000275830	AL355974.2	0	0.009969	0	0	0	0	0.030039	0	0
ENST00000458403	ENSG00000224821	COL4A2-AS2	0	5.1e-05	0	0	0	0	0.003079	0	0.000584
ENST00000611741	ENSG00000273558	AL512310.10	0	0	0	0	0	0	0.015306	0	0.001856
ENST00000548322	ENSG00000257285	AL132780.1	0	0	0	0	0	0	0.033994	0	0
ENST00000550089	ENSG00000258342	AL133304.3	0	0	0	0	0	0	0.006942	0	0
ENST00000651539	ENSG00000286099	AL390800.1	0	0	0	0	0	0	0.005009	0	0
ENST00000556913	ENSG00000214900	LINC01588	0	0	0	0	0	0	0.00381	0	0
ENST00000553463	ENSG00000214900	LINC01588	0.00617	0	0	0	0	0	0.024701	0	0.002489
ENST00000649892	ENSG00000258791	LINC00520	0	0	0	0	0	0	0.036872	0	0.002136
ENST00000650527	ENSG00000258791	LINC00520	0	0	0	0	0	0	0.006118	0	0
ENST00000557246	ENSG00000258803	AL355103.1	0	0	0	0	0	0	0.00421	0	0
ENST00000553288	ENSG00000250548	LINC01303	0	0	0	0	0	0.085	0.312305	0.085	0
ENST00000648279	ENSG00000214770	AL161756.1	0	0	0	0	0	0	0.038823	0	0
ENST00000556919	ENSG00000258623	AL121820.1	0.000123	0.000485	0	0	0	0.000826	0.017518	0.000826	0.002624
ENST00000556182	ENSG00000258957	AL359317.2	0	0	0.012594	0	0	0	0.046841	0	0
ENST00000557577	ENSG00000284930	AC005280.2	0	0	0	0	0	0	0.012747	0	0
ENST00000553732	ENSG00000258876	TGFB3-AS1	0.010243	0	0.009698	0	0	0.007283	0.06387	0.007283	0
ENST00000556271	ENSG00000258569	AC007376.2	0.014837	0	0	0	0.000966	0	0.027857	0	0
ENST00000553812	ENSG00000259106	AC008056.2	0	0.000339	0	0	0	0	0.010149	0	0
ENST00000556168	ENSG00000258807	AL359237.1	0	0	0	0	0	0	0.038489	0	0
ENST00000554519	ENSG00000258807	AL359237.1	0	0	0	0	0	0	0.0159	0	0
ENST00000565058	ENSG00000260711	AL121839.2	0	0	0	0	0	0	0.002691	0	0
ENST00000554161	ENSG00000258572	AL133467.1	0	0	0	0	0.009541	0	0.039737	0	0
ENST00000439819	ENSG00000235706	DICER1-AS1	0	0.028811	0	0	0	0	0.10132	0	0
ENST00000522771	ENSG00000214548	MEG3	0	0	0	0	0	0	0.000235	0	0
ENST00000636391	ENSG00000225746	MEG8	0	0	0	0	0	0	0.001804	0	0
ENST00000559867	ENSG00000259468	AC079203.2	0	0	0	0	0	0	0.003461	0	0
ENST00000559544	ENSG00000259598	AC116158.2	0	0	0	0	0	0	0.002881	0	0
ENST00000499797	ENSG00000246863	AC012377.1	0	0	0	0	0	0	0.021626	0	0
ENST00000560159	ENSG00000259618	AC012170.3	0	0	0	0	0	0	0.015052	0	0
ENST00000557898	ENSG00000259709	AC023906.4	0	0	0	0	0	0	0.000196	0	0
ENST00000566990	ENSG00000261265	AC025271.2	0	0	0	0	0	0	0.011168	0	0
ENST00000558140	ENSG00000245534	RORA-AS1	0.008543	0	0	0	0	0	0.025166	0	0
ENST00000620208	ENSG00000273958	AC009560.1	0	0	0	0	0	0	0.003815	0	0
ENST00000650148	ENSG00000285863	AC009554.2	0	0	0	0	0	0	0.008296	0	0
ENST00000559298	ENSG00000259673	IQCH-AS1	0	0	0	0	0	0.003313	0.119166	0.003313	0.008298
ENST00000565312	ENSG00000261634	AC026992.2	0	0	0	0	0	0	0.027018	0	0
ENST00000558309	ENSG00000245750	DRAIC	0	0	0	0	0	0	0.01271	0	0
ENST00000650343	ENSG00000259309	AC021818.1	0	0	0	0	0	0	0.0009	0	0
ENST00000567286	ENSG00000247240	UBL7-AS1	0.000732	0.007016	0	0.000125	0	0	0.020347	0	0
ENST00000559267	ENSG00000259495	AC016705.2	0	0	0	0	0	0	0.010623	0	0
ENST00000559781	ENSG00000259343	TMC3-AS1	0.00359	0	0	0	0	0	0.008255	0	0
ENST00000558261	ENSG00000259649	AC027808.2	0.005366	0	0	0	0	0	0.036235	0	0
ENST00000558687	ENSG00000250988	SNHG21	0	0.006812	0.002389	0.000538	0.000473	0.0005	0.060502	0.0005	0.001447
ENST00000559065	ENSG00000259551	AC048382.4	0	0	0.013286	0	0	0	0.021011	0	0
ENST00000558389	ENSG00000259212	AC103739.1	0	0	0	0	0	0	0.004482	0	0
ENST00000614972	ENSG00000251209	LINC00923	0	0	0	0	0	0	0.005319	0	0
ENST00000558885	ENSG00000259763	LINC02157	0	0	0	0	0	0	0.002935	0	0
ENST00000558838	ENSG00000259172	AC023024.1	0	0	0	0	0	0	0.002789	0	0
ENST00000507796	ENSG00000248893	FAM138E	0	0	0	0	0	0	0.003875	0	0
ENST00000559252	ENSG00000248893	FAM138E	0	0	0	0	0	0	0.006471	0	0
ENST00000566287	ENSG00000261641	AL031600.3	0	0	0	0	0	0	0.144784	0	0
ENST00000573260	ENSG00000262482	AC004034.1	0.011028	0	0	0	0	0	0.031029	0	0.00551
ENST00000573414	ENSG00000263072	ZNF213-AS1	0	0	0	0	0	0	0.029878	0	0
ENST00000570949	ENSG00000261971	MMP25-AS1	0.000937	0	0	0	0	0.000642	0.038084	0.000642	0
ENST00000569215	ENSG00000260756	AC131649.1	0	0	0	0	0	0	0.008851	0	0
ENST00000641621	ENSG00000262454	MIR193BHG	0	0	0	0	0	0	0.126822	0	0
ENST00000571639	ENSG00000262454	MIR193BHG	0	0	0	0	0	0	0.014909	0	0
ENST00000641906	ENSG00000262454	MIR193BHG	0	0	0	0	0	0	1.7e-05	0	0
ENST00000574364	ENSG00000263307	AC007216.4	0.002972	0	0	0	0.001201	0	0.011005	0	0.000676
ENST00000568895	ENSG00000261669	AC008731.1	0	0	0	0	0	0	0.016025	0	0
ENST00000566535	ENSG00000245888	NSMCE1-DT	0	0	0	0	0	0	0.047881	0	0.011596
ENST00000642450	ENSG00000285367	AC087564.1	0	0	0	0	0	0	0.015799	0	0.003026
ENST00000564801	ENSG00000261630	AC007496.2	0	0	0	0	0	0	0.017134	0	0
ENST00000565441	ENSG00000246379	AC007495.1	0	0	0	0	0	0	0.023578	0	0
ENST00000649944	ENSG00000260558	AC018557.2	0	0	0	0	0	0	0.007426	0	0
ENST00000567077	ENSG00000260185	AC009097.1	0	0	0	0	0	0	0.000154	0	0
ENST00000563690	ENSG00000261707	AC092134.1	0	0	0	0	0	0	0.011715	0	0
ENST00000562180	ENSG00000261218	AC099524.1	0	0	0	0	0	0	0.008275	0	0
ENST00000563342	ENSG00000259914	AC009063.1	0	0	0	0	0	0	0.029371	0	0
ENST00000598996	ENSG00000268388	FENDRR	0	0	0	0	0	0.007017	0.034097	0.007017	0
ENST00000466740	ENSG00000241525	AC141424.1	0	0	0	0	0	0	0.013434	0	0
ENST00000572876	ENSG00000262050	AC005696.1	0.01162	0	0	0	0	0	0.033683	0	0
ENST00000575889	ENSG00000215067	ALOX12-AS1	0.005963	0	0	0	0	0	0.008761	0	0
ENST00000572547	ENSG00000267047	AC040977.2	0	0	0	0.000321	0	0.001815	0.006409	0.001815	0
ENST00000576615	ENSG00000263301	AC113189.3	0	0	0	0	0	0	0.015223	0	0
ENST00000581533	ENSG00000266744	AC005304.3	0	0	0	0	0	0	0.036589	0	0
ENST00000435028	ENSG00000230197	AC007952.3	0	0	0	0	0	0	0.048456	0	0.01087
ENST00000399087	ENSG00000197665	AC007952.1	0	0	0	0	0.005833	0	0.068643	0	0.00669
ENST00000628484	ENSG00000281856	AC106017.2	0	0	0	0	0.009482	0	0.145494	0	0.022656
ENST00000577841	ENSG00000233098	CCDC144NL-AS1	0	0	0	0	0	0	0.009432	0	0
ENST00000582125	ENSG00000266775	AC011840.4	0	0	0	0	0	0	0.006078	0	0
ENST00000578774	ENSG00000266208	AC080112.1	0	0	0	0	0	0	0.004476	0	0
ENST00000635600	ENSG00000267002	AC060780.1	0.000995	0	0	0	0	0	0.047276	0	0
ENST00000588279	ENSG00000260793	AC003102.1	0	0	0	0	0	0	0.001033	0	0
ENST00000578239	ENSG00000264701	AC018521.4	0	0	0	0	0	0	0.038553	0	0
ENST00000514506	ENSG00000249906	AC006487.1	0	0	0	0	0	0	0.012006	0	0
ENST00000573301	ENSG00000262006	AC005920.4	0	0	0	0	0	0	0.014759	0	0
ENST00000647929	ENSG00000285879	AC018628.2	0	0	0	0	0	0	0.000131	0	0
ENST00000577573	ENSG00000264026	LINC02003	0	0	0	0	0	0	0.022017	0	0
ENST00000647961	ENSG00000267123	SCAT1	0.000425	0	0	0	0	0.000275	0.001671	0.000275	0
ENST00000649791	ENSG00000267123	SCAT1	0.012335	0	0	0	0	0.001693	0.046657	0.001693	0
ENST00000573346	ENSG00000262580	AC087741.1	0	0	0	0	0	0	0.015084	0	0
ENST00000572590	ENSG00000263271	AC110285.4	0	0	0	0	0	0	0.037363	0	0
ENST00000572850	ENSG00000262898	AC139099.2	0	0	0	0	0	0	0.000927	0	0
ENST00000573737	ENSG00000262094	AC139099.1	0	0	0	0	0	0	0.018896	0	0
ENST00000579097	ENSG00000263745	AP005230.1	0	0	0	0	0	0.005069	0.013249	0.005069	0
ENST00000579595	ENSG00000264339	AP001020.1	0	0	0	0	0	0	0.018712	0	0
ENST00000582375	ENSG00000266053	NDUFV2-AS1	0.008398	0	0	0	0	0.008816	0.147743	0.008816	0.007904
ENST00000578243	ENSG00000263618	AP005121.1	0	0	0	0	0	0	0.017021	0	0
ENST00000584201	ENSG00000266010	GATA6-AS1	0	0	0	0	0	0	0.024006	0	0
ENST00000579356	ENSG00000266850	AC090912.2	0	0	0	0	0	0	0.004085	0	0
ENST00000579347	ENSG00000264365	AC023983.1	0	0	0	0	0	0	0.007027	0	0
ENST00000582307	ENSG00000263698	AC012417.1	0	0	0	0	0	0	0.00902	0	0
ENST00000596954	ENSG00000268873	AC022601.1	0.002458	0	0	0.004311	0	0.003817	0.049532	0.003817	0
ENST00000587138	ENSG00000267316	AC090409.2	0	0.016173	0.04905	0	0.012707	0	0.192441	0	1e-06
ENST00000606242	ENSG00000267530	LINC01836	0.026575	0.01691	0.021969	0.042629	0.212817	0.045864	1.06582	0.045864	0.014351
ENST00000585980	ENSG00000267688	KF456478.1	0	0	0	0	0	0	0.129238	0	0
ENST00000587701	ENSG00000267139	AC005262.2	0.004468	0	0.003234	0.00305	0.029244	0.013426	0.089616	0.013426	0.000864
ENST00000615487	ENSG00000275234	AC010503.4	0.001794	0	0	0	0	0	0.013622	0	0
ENST00000602083	ENSG00000269371	AC008878.4	0	0	0	0	0	0	0.047136	0	0
ENST00000644103	ENSG00000214049	UCA1	0	0	0	0	0	0	0.001589	0	0
ENST00000645156	ENSG00000214049	UCA1	0	0	0	0	0	0.004501	0.029142	0.004501	0.007081
ENST00000601040	ENSG00000269427	AC024075.3	0.002817	0	0	0	0	0	0.004787	0	0
ENST00000596643	ENSG00000269439	AC010618.4	0	0	0.00249	0.027576	0	0.002122	0.148978	0.002122	0.003765
ENST00000590697	ENSG00000267481	AC011477.2	0	0	0	0.032557	0	0.03996	0.152197	0.03996	0
ENST00000596203	ENSG00000268658	LINC00664	0	0	0	0	0	0	0.015445	0	0
ENST00000473738	ENSG00000240713	RN7SL860P	0	0	0	0	0	0	0.081247	0	0
ENST00000587859	ENSG00000267498	AC007786.1	0	0.000215	0.000265	0	0.000106	0.000341	0.004682	0.000341	0.000357
ENST00000392227	ENSG00000227392	HPN-AS1	0	0	0	0	0	0	0.01701	0	0
ENST00000604228	ENSG00000270760	AD001527.1	0	0	0	0	0	0	0.037504	0	0
ENST00000588495	ENSG00000267107	PCAT19	0	0	0	0	0.000177	0	0.00571	0	0
ENST00000594624	ENSG00000213904	LIPE-AS1	0	0	0	0	0	0	0.006325	0	4.6e-05
ENST00000600665	ENSG00000268636	AC011495.2	0	0	0	0	0	0	0.018895	0	0
ENST00000594512	ENSG00000267879	AC011483.1	0	0	0	0	0	0	0.016137	0	0
ENST00000596631	ENSG00000268496	AC245884.9	0	0	0	0	0	0	0.002717	0	0
ENST00000429878	ENSG00000224184	MIR3681HG	0	0	0	0	0	0	0.067184	0	0
ENST00000432822	ENSG00000235911	AC019055.1	0	0	0	0	0	0	0.021156	0	0
ENST00000637384	ENSG00000228999	AC096570.1	0	0	0	0	0	0	0.004076	0	0
ENST00000313031	ENSG00000235072	AC012074.1	0	0	0	0	0.000807	0	0.012077	0	0
ENST00000606100	ENSG00000232973	CYP1B1-AS1	0	0	0	0	0	0	0.007099	0	0
ENST00000446698	ENSG00000231312	MAP4K3-DT	0	0	0	0	0	0	0.081782	0	0
ENST00000439182	ENSG00000235760	AC138655.1	0.021361	0.009967	0	0	0.004927	0	0.083458	0	0
ENST00000446139	ENSG00000226702	MIR217HG	0	0	0	0	0	0	0.010413	0	0
ENST00000416111	ENSG00000226622	AC092155.1	0	0.01372	0	0	0	0	0.020112	0	0
ENST00000450294	ENSG00000235885	LINC01828	0	0	0	0	0	0	0.018683	0	0
ENST00000628692	ENSG00000235885	LINC01828	0	0.006543	0	9.3e-05	0	0	0.024266	0	0
ENST00000529783	ENSG00000225439	BOLA3-AS1	0	0	0.026238	0	0	0	0.048036	0	0
ENST00000474753	ENSG00000286011	AC062037.3	0	0	0	0	0	0	0.038414	0	0.00675
ENST00000645138	ENSG00000222041	CYTOR	0	0	0	0	0	0	0.117148	0	0
ENST00000448359	ENSG00000175772	LINC01106	0.019466	0	0	0	0	0	0.081942	0	0
ENST00000439362	ENSG00000172965	MIR4435-2HG	0.128837	0	0	0.126483	0	0	0.375387	0	0
ENST00000438409	ENSG00000234174	AC016683.1	0	0	0	0	1e-06	0	1.7e-05	0	0
ENST00000627670	ENSG00000235066	AC009303.2	0.006016	0	0	0	0	0	0.011983	0	0
ENST00000454260	ENSG00000229867	STEAP3-AS1	0	0	0	0	0	0.003483	0.006107	0.003483	0
ENST00000599279	ENSG00000231890	DARS-AS1	0	0	0	0	0	0.006872	0.018009	0.006872	0
ENST00000444649	ENSG00000231890	DARS-AS1	0	0	0	0	0	0.000451	0.007232	0.000451	0.000246
ENST00000548051	ENSG00000231758	AC092652.1	0	0	0	0	0	0	0.05513	0	0
ENST00000451774	ENSG00000226674	TEX41	0	0	0	0	0	0	0.002328	0	0
ENST00000596970	ENSG00000226674	TEX41	0	0	0	0	0	0	0.004346	0	0
ENST00000630724	ENSG00000226674	TEX41	0	0	0	0	0	0	0.065861	0	0
ENST00000628422	ENSG00000226674	TEX41	0	0	0	0	0	0	0.002904	0	0
ENST00000630139	ENSG00000226674	TEX41	0	0	0	0	0	0.003128	0.012474	0.003128	0
ENST00000648781	ENSG00000238057	ZEB2-AS1	0	0	0	0	0	0	0.007597	0	0
ENST00000608361	ENSG00000238057	ZEB2-AS1	0	0	0	0	0	0.014564	0.069503	0.014564	0.021717
ENST00000610947	ENSG00000238057	ZEB2-AS1	0	0	0	0	0	0	0.00781	0	0
ENST00000609886	ENSG00000231079	AC105402.3	0	0	0	0	0	0.011341	0.069619	0.011341	0
ENST00000420020	ENSG00000223642	AC008277.1	0	0	0	0	0	0	0.000169	0	0
ENST00000628960	ENSG00000236283	AC019197.1	0	0	0	0	0	0	0.089359	0	0
ENST00000441205	ENSG00000236501	AC074286.1	0	0	0	0	0	0	0.012259	0	0
ENST00000420672	ENSG00000223960	PRKRA-AS1	0	0	0	0	0	0	5.3e-05	0	0
ENST00000450044	ENSG00000223960	PRKRA-AS1	0	0	0	0	0	0	0.000207	0	0
ENST00000645995	ENSG00000234663	LINC01934	0	0	0	0	0	0	0.002044	0	0
ENST00000625550	ENSG00000225963	AC009950.1	0	0	0	0	0	0	0.033348	0	0
ENST00000451507	ENSG00000229539	AL353194.1	0.002548	0.008667	0	0.002038	0	0.001614	0.040939	0.001614	0.001342
ENST00000428285	ENSG00000233993	AL121900.1	0.000558	0	0	0	0	0	0.011059	0	0
ENST00000437012	ENSG00000230908	AL591074.1	0	0	0	0	0	0	0.013518	0	0
ENST00000584071	ENSG00000175170	FAM182B	0	0	0	0	0	0	3.2e-05	0	0
ENST00000448580	ENSG00000231081	AL078587.1	0	0	0	0	0	0	0.024566	0	0
ENST00000441208	ENSG00000232406	AL121895.1	0.001459	0	0	0	0	0	0.004367	0	0
ENST00000444436	ENSG00000229976	AL118523.1	0	0	0	0	0	0	8e-06	0	0
ENST00000526566	ENSG00000255438	AL354813.1	0	0	0	0	0	0	0.009602	0	0
ENST00000651976	ENSG00000224397	SMIM25	0	0	0	0	0	0	0.025049	0	0
ENST00000432910	ENSG00000228340	MIR646HG	0	0	0	0	0	0	0.009175	0	0
ENST00000620908	ENSG00000275812	AL121829.2	0	0	0	0	0	0	0.024954	0	0.010983
ENST00000652633	ENSG00000270071	AP001172.1	0	0	0	0	0	0	0.001204	0	0
ENST00000447125	ENSG00000215533	LINC00189	0	0	0	0	0	0	0.007501	0	0
ENST00000608072	ENSG00000228817	BACH1-IT2	0	0	0	0	0	0	0.020802	0	0
ENST00000477513	ENSG00000205930	C21orf62-AS1	0	0.023815	0	0	0	0	0.040322	0	0
ENST00000428667	ENSG00000233818	AP000695.2	0.006216	0	0	0	0	0	0.196988	0	0.066075
ENST00000651182	ENSG00000286082	AL133493.1	0	0	0	0	0	0	0.027882	0	0
ENST00000446475	ENSG00000224574	COL18A1-AS2	0.001665	0	0	0	0	0	0.013071	0	0
ENST00000421927	ENSG00000215424	MCM3AP-AS1	0	0	0	0	0	0.004939	0.008935	0.004939	0
ENST00000329743	ENSG00000185837	HDHD5-AS1	0	0	0	0	0	0	0.000334	0	0
ENST00000412149	ENSG00000234630	AC245060.2	0	0	0	0	0	0	0.051441	0	0
ENST00000454863	ENSG00000224277	AP000345.1	0	0	0	0	0	0	0.012658	0	0
ENST00000444388	ENSG00000244625	MIATNB	0	0	0	0	0	0	0.238311	0	0
ENST00000432624	ENSG00000235989	MORC2-AS1	0	0	0	0	0	0	0.038938	0	0
ENST00000430449	ENSG00000227519	AL008719.1	0	0.003814	0	0	0	0	0.014795	0	0
ENST00000442579	ENSG00000228719	AL022313.2	0	0	0	0	0	0	0.01175	0	0
ENST00000641859	ENSG00000284633	AL031590.1	0	0	0	0	0	0	0.010075	0	0
ENST00000420537	ENSG00000231993	EP300-AS1	0	0	0	0	0	0	0.03025	0	0
ENST00000445441	ENSG00000241990	PRR34-AS1	0	0	0	0.030099	0	0	0.166149	0	0
ENST00000651754	ENSG00000224271	AL117329.1	0.003648	0	0	0	0	0	0.015819	0	0
ENST00000651948	ENSG00000224271	AL117329.1	0	0	0	0	0	0	0.020119	0	0.0022
ENST00000391625	ENSG00000212939	Z97192.1	0	0	0	0	0	0	0.001203	0	0
ENST00000489771	ENSG00000235978	AC018816.1	0	0	0	0	0	0	0.00607	0	0
ENST00000469846	ENSG00000206573	THUMPD3-AS1	1e-06	3e-06	2e-06	1e-06	0	0	0.004173	0	1e-06
ENST00000521708	ENSG00000206573	THUMPD3-AS1	0	0	5.2e-05	0	0	5e-06	0.000138	5e-06	0
ENST00000524210	ENSG00000206573	THUMPD3-AS1	0	0	0	9.6e-05	0	0	0.000373	0	0
ENST00000624232	ENSG00000274840	AC132807.2	0	0	0	0	0	0	0.030528	0	0
ENST00000635847	ENSG00000235904	RBMS3-AS3	0	0	0	0	0	0	0.199766	0	0
ENST00000429315	ENSG00000227398	KIF9-AS1	0.001077	0.00595	0	0	0	0	0.02125	0	0
ENST00000584239	ENSG00000265078	RN7SL664P	0	0	0	0	0	0	0.030626	0	0
ENST00000485174	ENSG00000241684	ADAMTS9-AS2	0	0	0	0	0	0	0.001363	0	0
ENST00000463143	ENSG00000243701	DUBR	0	0	0	0	0	0	0.080361	0	0
ENST00000504993	ENSG00000251011	TMEM108-AS1	0	0	0	0	0	0.010521	0.038201	0.010521	0
ENST00000514729	ENSG00000248932	AC097103.2	0	0	0	0	0	0	0.035492	0	0
ENST00000512398	ENSG00000248790	AC097103.1	0	0	0	0	0	0	0.03433	0	0
ENST00000594095	ENSG00000241570	PAQR9-AS1	0	0	0	0	0	0	0.026214	0	0
ENST00000497379	ENSG00000241767	LINC01324	0	0	0	0	0	0	0.011184	0	0
ENST00000482559	ENSG00000239381	AC125613.1	0	0	0	0	0	0	0.008842	0	0
ENST00000425454	ENSG00000230115	TPRG1-AS2	0	0	0	0	0	0	0.008606	0	0
ENST00000625358	ENSG00000242086	MUC20-OT1	0	0	0	0	0	0	0.014409	0	0
ENST00000627152	ENSG00000242086	MUC20-OT1	0	0	0	0	0	0	0.001071	0	0
ENST00000628301	ENSG00000242086	MUC20-OT1	0	0	0	0.002809	0	0.003997	0.041684	0.003997	0
ENST00000618708	ENSG00000242086	MUC20-OT1	0	0	0	0	0	0	0.062363	0	0
ENST00000631189	ENSG00000242086	MUC20-OT1	0.004873	0.000149	0.000474	0.002295	0.005911	0.004559	0.069066	0.004559	0.006425
ENST00000650701	ENSG00000286168	AC024937.3	0	0	0.004842	0	0	0	0.013459	0	0
ENST00000528132	ENSG00000205959	AC105345.1	0.021719	0	0	0.010586	0	0	0.057473	0	0
ENST00000503493	ENSG00000250413	AC005674.1	0	0	0	0	0	0	0.020146	0	0
ENST00000500394	ENSG00000247624	CPEB2-DT	0	0	0	0	0	0	0.002702	0	0
ENST00000508563	ENSG00000248143	LINC02383	0	0	0	0	0	0	0.052897	0	0.012525
ENST00000564513	ENSG00000260120	AC104066.2	0	0	0	0	0	0	0.005383	0	0
ENST00000509711	ENSG00000248317	AC111194.1	0	0	0	0	0	0	0.00955	0	0
ENST00000503589	ENSG00000248719	AC021127.1	0	0	0	0	0	0	0.016585	0	0
ENST00000652481	ENSG00000180769	WDFY3-AS2	0	0	0	0	0	0	0.008534	0	0
ENST00000610572	ENSG00000274238	AC097478.2	0	0	0	0	0	0	0.012217	0	0
ENST00000615968	ENSG00000277695	AC097478.4	0	0	0	0	0	0	0.00778	0	0
ENST00000508578	ENSG00000248676	AC083902.1	0	0	0	0	0	0	0.012469	0	0
ENST00000515414	ENSG00000251586	TET2-AS1	0	0	0	0	0	0	0.00904	0	0
ENST00000509834	ENSG00000251432	LINC02615	0	0	0	0	0	0	0.000626	0	0
ENST00000505289	ENSG00000250241	AC105383.1	0	0	0	0	0	0	0.030796	0	0.003181
ENST00000607691	ENSG00000272049	AC091965.4	0	0	0	0	0	0	0.03156	0	0
ENST00000508097	ENSG00000250814	LINC02221	0	0	0	0	0	0	0.034017	0	0
ENST00000506304	ENSG00000250106	ANKRD33B-AS1	0	0	0	0	0	0	0.017954	0	0.002392
ENST00000510648	ENSG00000249937	LINC02223	0	0	0	0	0	0	0.020282	0	0
ENST00000606282	ENSG00000271892	AC026790.1	0	0	0.02149	0	0	0	0.042501	0	0
ENST00000503452	ENSG00000251141	MRPS30-DT	0	0	0	0	0	0	0.012704	0	0.004459
ENST00000514597	ENSG00000251141	MRPS30-DT	0	0	0	0	0	0	0.011914	0	0
ENST00000606697	ENSG00000248092	NNT-AS1	0	0	0	0	0	0	0.035192	0	0
ENST00000500258	ENSG00000248092	NNT-AS1	0	0	0	0	0	0	0.058871	0	0
ENST00000645459	ENSG00000250802	ZBED3-AS1	0	0	0	0	0	0	0.025909	0	0
ENST00000508401	ENSG00000250802	ZBED3-AS1	0.013382	0	0	0	0	0	0.021129	0	0
ENST00000648385	ENSG00000248323	LUCAT1	0	0	0	0	0	0	0.010642	0	0
ENST00000650008	ENSG00000248323	LUCAT1	0	0	0	0	0	0	0.02932	0	0
ENST00000648683	ENSG00000248323	LUCAT1	0	0	0	0	0	0	0.038638	0	0
ENST00000648923	ENSG00000248323	LUCAT1	0	0	0	0	0	0	0.005484	0	0
ENST00000510254	ENSG00000237187	NR2F1-AS1	0	0	0	0	0	0	0.064488	0	0
ENST00000509999	ENSG00000251409	AC008592.4	0	0	0	0	0	0	0.028627	0	0
ENST00000502262	ENSG00000247121	AC009126.1	0	0	0	0	0	0	0.016059	0	0
ENST00000513158	ENSG00000251314	AC104123.1	0	0	0	0	0	0	0.003586	0	0
ENST00000499025	ENSG00000247877	AC021086.1	0	0.003416	0	0	0	0.001751	0.025651	0.001751	0
ENST00000624802	ENSG00000272154	AC244517.2	0	0	0	0	0	0	0.003011	0	0
ENST00000432015	ENSG00000226272	ARHGAP26-AS1	0	0	0	0	0	0	0.010114	0	0
ENST00000503323	ENSG00000249881	AC008696.2	0	0	0	0	0	0	0.011095	0	0
ENST00000521472	ENSG00000249738	AC008691.1	0	0	0	0	0	0	0.031305	0	0
ENST00000523205	ENSG00000253968	AC016573.1	0	0	0	0	0	0	0.01302	0	0
ENST00000519821	ENSG00000253768	AC008663.1	0	0	0	0	0	0	0.049367	0	0.021464
ENST00000517299	ENSG00000253955	AC008663.2	0	0	0	0	0	0.004174	0.010548	0.004174	0
ENST00000511707	ENSG00000249306	LINC01411	0	0.008212	0	0	0.011694	0	0.057435	0	0
ENST00000509329	ENSG00000250801	AC138965.1	0	0	0	0	0	0	0.010949	0	0
ENST00000511796	ENSG00000250801	AC138965.1	0	0	0	0	0	0	0.002184	0	0
ENST00000504362	ENSG00000249186	AC140125.3	0	0	0	0	0	0	0.010949	0	0
ENST00000504214	ENSG00000249186	AC140125.3	0	0	0	0	0	0	0.002184	0	0
ENST00000648679	ENSG00000285694	AL162718.2	0	0	0	0	0	0	0.006283	0	0
ENST00000431369	ENSG00000225775	AL137220.1	0	0	0	0	0	0	0.014179	0	0
ENST00000437648	ENSG00000234261	AL138720.1	0	0	0	0	0	0	0.016546	0	0
ENST00000606851	ENSG00000272168	CASC15	0.001062	0	0.006276	0	0	0	0.032995	0	0
ENST00000651007	ENSG00000272168	CASC15	0	0	0	0	0	0	3.6e-05	0	0
ENST00000602550	ENSG00000231074	HCG18	0.023099	0	0	0	0	0	0.102258	0	0
ENST00000630418	ENSG00000274259	SYNGAP1-AS1	0	0	0	4.7e-05	0	9.8e-05	0.030988	9.8e-05	0.003961
ENST00000650432	ENSG00000285888	Z85996.2	0	0	0	0	0	0	0.017102	0	0
ENST00000453216	ENSG00000225791	TRAM2-AS1	0.000265	0.000119	0.001912	0.000374	9.7e-05	0.000382	0.031224	0.000382	0.002116
ENST00000590164	ENSG00000226803	ZNF451-AS1	0	0	0	0	0	0	0.011131	0	0
ENST00000424274	ENSG00000232120	AL357375.1	0.007388	0	0	0	0	0	0.02017	0	0
ENST00000652655	ENSG00000233237	LINC00472	0	0	0	0	0	0	0.132245	0	0
ENST00000607823	ENSG00000271860	AL589740.1	0	0	0	0	0	0	0.009078	0	0
ENST00000648833	ENSG00000203808	BVES-AS1	0	0	0	0	0	0	0.02357	0	0
ENST00000436876	ENSG00000228624	HDAC2-AS2	0	9e-06	0	0	0	0	2.3e-05	0	0
ENST00000415964	ENSG00000227678	AL355581.1	0	0	0	0	0	0	0.011292	0	0
ENST00000430428	ENSG00000236166	AL021408.1	0	0	0	0	0	0.008323	0.029415	0.008323	0
ENST00000458028	ENSG00000228495	LINC01013	0	0	0	0	0	0	0.013936	0	0
ENST00000626414	ENSG00000237596	AL138828.1	0	0	0	0	0	0	0.023806	0	0
ENST00000445585	ENSG00000225148	AL050338.1	0	0	0	0	0	0	0.009738	0	0
ENST00000650173	ENSG00000226571	AL592429.2	0	0	0	0	0	0.003074	0.009037	0.003074	0
ENST00000436295	ENSG00000227748	AL138916.1	0	0	0	0	0.01467	0	0.020598	0	0
ENST00000423268	ENSG00000224658	AL513164.1	0	0	0	0	0	0	0.012195	0	0
ENST00000419196	ENSG00000230234	AL162582.1	0	0	0	0	0	0	0.040004	0	0
ENST00000609307	ENSG00000272894	AC004982.2	0	0	0	0	0	0	0.044058	0	0
ENST00000419463	ENSG00000236318	AC019117.2	0	0	0	0	0	0	0.00433	0	0
ENST00000428100	ENSG00000243004	AC005062.1	0	0	0	0	0	0.015559	0.030102	0.015559	0
ENST00000614528	ENSG00000222004	C7orf71	0	0.004753	0	0.014586	0	0.003035	0.047744	0.003035	0.00367
ENST00000647851	ENSG00000240990	HOXA11-AS	0	0	0	0	0	0	0.038442	0	0
ENST00000628246	ENSG00000232006	AC005537.1	0	0	0	0	0	0	0.015438	0	0
ENST00000439360	ENSG00000226824	AC006001.2	0	0	0.019964	0	0	0	0.091521	0	0
ENST00000447785	ENSG00000234520	AC018464.1	0	0	0	0	0	0	0.020052	0	0
ENST00000471672	ENSG00000242072	AC092590.1	0	0	0	0	0	0	0.012717	0	0
ENST00000421965	ENSG00000243220	AC006159.2	0	0	0	0	0	0	0.06865	0	0.003852
ENST00000566357	ENSG00000261570	AC073878.1	0	0	0	0	0	0	0.006666	0	0
ENST00000446192	ENSG00000231840	AC073342.1	0	0	0	0	0	0	0.007554	0	0
ENST00000608912	ENSG00000273293	AC093458.1	0	0.004203	0	0	0	0	0.035321	0	0
ENST00000606572	ENSG00000272240	AC004908.1	0	0	0	0	0	0	0.013628	0	0
ENST00000607368	ENSG00000271743	AF287957.1	0	0	0	0	0	0	0.023425	0	0.008914
ENST00000520017	ENSG00000254340	AC022784.5	0	0	0	0	0	0	0.00643	0	0
ENST00000649829	ENSG00000248538	AC022784.1	0.000206	0	0	0	0	0	0.006963	0	0.000167
ENST00000624614	ENSG00000184608	FAM167A-AS1	0	0	0	0	0	0	0.001013	0	0
ENST00000522670	ENSG00000253335	AC009884.1	0	0	0	0	0	0	0.005102	0	0
ENST00000558292	ENSG00000259196	HMBOX1-IT1	0.003179	0	0	0	0	0	0.027355	0	0.002699
ENST00000521623	ENSG00000253361	AC069120.1	0.005274	0	0	0	0	0	0.026633	0	0
ENST00000423716	ENSG00000228801	AC064807.1	0	0.01643	0	0	0.015732	0	0.087563	0	0
ENST00000623646	ENSG00000274956	NKAIN3-IT1	0	0	0	0	0	0	0.003994	0	0
ENST00000521556	ENSG00000253121	AC120042.2	0	0	0	0	0	0	0.002295	0	0
ENST00000520902	ENSG00000254081	LINC01299	0	0	0	0	0	0	0.007104	0	0
ENST00000644465	ENSG00000253238	AC034114.2	0	0	0	0	0	0	0.013563	0	0
ENST00000517437	ENSG00000253773	C8orf37-AS1	0	0	0	0	0	0	0.051382	0	0
ENST00000523110	ENSG00000253672	AC105177.1	0	0	0	0	0	0	0.008443	0	0
ENST00000607393	ENSG00000272043	AC016405.2	0	0.015308	0.004871	0.00542	0.002112	0.018463	0.124376	0.018463	0.005696
ENST00000517525	ENSG00000249859	PVT1	0	0	0	0	0	0	0.043337	0	0
ENST00000518520	ENSG00000254019	AC011676.2	0	0	0	0	0	0	0.031741	0	0
ENST00000523657	ENSG00000253196	AC083841.1	0	0	0	0	0	0	0.027976	0	0
ENST00000518024	ENSG00000247317	LY6E-DT	0	0	0	0	0	0	0.095619	0	0
ENST00000529743	ENSG00000254973	AC105219.4	0	0	0	0	0	0	0.004013	0	0
ENST00000580467	ENSG00000240498	CDKN2B-AS1	0	0	0	0	0	0	0.032552	0	0
ENST00000581051	ENSG00000240498	CDKN2B-AS1	0.026286	0	0	0	0	0	0.086212	0	0
ENST00000582072	ENSG00000240498	CDKN2B-AS1	0.017635	0	0	0	0	0	0.110507	0	0
ENST00000584351	ENSG00000240498	CDKN2B-AS1	0.000353	0.000119	0.001086	0.001159	0.00274	0	0.019766	0	0
ENST00000424177	ENSG00000231193	AL157884.2	0	0	0	0	0	0	0.017009	0	0
ENST00000616097	ENSG00000276266	FP325318.1	0	0	0	0	0	0	0.031965	0	0.011067
ENST00000645704	ENSG00000225937	PCA3	0.000617	0	0	0	0	0	0.006774	0	0
ENST00000645745	ENSG00000228714	AL691420.1	0	0	0	0	0	0	0.010735	0	0
ENST00000602325	ENSG00000269970	AL162424.1	0	0	0	0.021486	0	0	0.032654	0	0
ENST00000414926	ENSG00000230684	AL158207.2	0	0	0	0	0	0	0.017617	0	0
ENST00000371417	ENSG00000203993	ARRDC1-AS1	0.09185	0.149369	0.369235	0.219673	0.027447	0.118404	5.24134	0.118404	0.22279
ENST00000425740	ENSG00000236017	ASMTL-AS1	0.03271	0.059891	0.014616	0	0	0	0.318675	0	0.035188
ENST00000620748	ENSG00000277605	RF00017	0	0	0	0	0	0	0.006229	0	0
ENST00000640437	ENSG00000225470	JPX	0	0	0	0	0	0.008164	0.085374	0.008164	0
ENST00000638681	ENSG00000230590	FTX	0	0	0	0	0	0	7e-06	0	0
ENST00000635331	ENSG00000282914	Z83818.2	0	0	0	0	0.010415	0	0.022559	0	0
ENST00000411328	ENSG00000223260	RN7SKP194	0	0	0	0.014072	0	0	0.044146	0	0.006842
ENST00000432696	ENSG00000235703	LINC00894	0	0	0	0	0	0	0.018573	0	0
ENST00000635455	ENSG00000225605	AC092813.1	0	0	0	0	0	0	0.005951	0	0
ENST00000414418	ENSG00000230864	AC099567.1	0	0	0	0	0	0	0.003612	0	0
ENST00000449439	ENSG00000239216	AL139420.2	0	0	0	0	0	0	0.020603	0	0
ENST00000415675	ENSG00000225670	CADM3-AS1	0	0	0	0	0	0	0.002595	0	0
ENST00000413005	ENSG00000235303	AL023495.1	0	0	0	0	0	0	0.004857	0	0
ENST00000454538	ENSG00000227240	AL356272.1	0	0	0	0	0	0	0.027373	0	0
ENST00000651527	ENSG00000286213	AC092803.3	0	0	0	0	0	0	0.014895	0	0
ENST00000421320	ENSG00000234944	LINC02623	0	0	0	0	0	0	0.021872	0	0.008407
ENST00000551288	ENSG00000229847	EMX2OS	0	0	0	0	0	0	0.001249	0	0
ENST00000443633	ENSG00000232903	LINC01166	0	0	0	0	0	0	0.003219	0	0
ENST00000420873	ENSG00000236301	MRGPRG-AS1	0	0	0	0	0	0	0.005155	0	0
ENST00000411066	ENSG00000222998	RN7SKP259	0	0	0	0	0	0	0.046532	0	0
ENST00000544004	ENSG00000255606	AP000439.1	0	0	0	0	0	0	0.045812	0	0
ENST00000531347	ENSG00000254417	LINC02584	0	0	0	0	0	0	0.009335	0	0
ENST00000418006	ENSG00000235049	LINC00940	0	0	0	0	0	0	0.00304	0	0
ENST00000544399	ENSG00000256256	AC019209.1	0	0	0	0	0	0	0.013763	0	0
ENST00000549734	ENSG00000257771	LINC02395	0	0	0	0	0	0	0.011322	0	0
ENST00000548172	ENSG00000258183	LINC02392	0	0	0	0	0	0	0.011425	0	0
ENST00000546710	ENSG00000257893	LINC02404	0	0	0	0	0	0	0.027611	0	0.01213
ENST00000551075	ENSG00000257863	AC090049.1	0	0.00923	0	0	0	0	0.01854	0	0
ENST00000548344	ENSG00000258312	AC016152.1	0	0	0	0	0	0	0.026224	0	0
ENST00000547819	ENSG00000258254	AC010177.1	0	0	0	0	0	0	0.014825	0	0
ENST00000603439	ENSG00000271579	AC078880.3	0	0	0	0	0	0	0.037901	0	0
ENST00000612609	ENSG00000275788	RF00017	0	0	0	0	0	0	0.014246	0	0
ENST00000432701	ENSG00000237361	TUSC8	0	0	0	0	0	0	0.009538	0	0
ENST00000622486	ENSG00000277047	AL390964.1	0	0	0	0	0	0	0.010506	0	0
ENST00000648060	ENSG00000285572	AL136441.1	0	0	0	0	0	0	0.010578	0	0
ENST00000450187	ENSG00000227676	LINC01068	0	0	0	0	0	0	0.051522	0	0
ENST00000569476	ENSG00000261446	LINC00559	0	0	0	0	0	0	0.000885	0	0
ENST00000619612	ENSG00000277246	AL157762.1	0.00405	0	0	0	0	0	0.022508	0	0
ENST00000555024	ENSG00000258860	AL133163.2	0	0	0	0	0	0	0.010213	0	0
ENST00000649337	ENSG00000285826	AL356807.1	0	0	0	0	0	0.004383	0.008653	0.004383	0
ENST00000555595	ENSG00000258383	AL132819.1	0	0	0	0	0	0	0.016385	0	0
ENST00000553575	ENSG00000258498	DIO3OS	0	0	0	0	0	0	0.009515	0	0
ENST00000554735	ENSG00000258498	DIO3OS	0	0	0	0	0	0	0.002915	0	0
ENST00000558875	ENSG00000259737	AC087516.2	0	0	0	0	0	0	0.002435	0	0
ENST00000616204	ENSG00000276473	AC107905.1	0	0	0	0	0	0	0.012173	0	0
ENST00000558436	ENSG00000259289	LINC02206	0	0	0	0	0	0	0.02607	0	0
ENST00000559299	ENSG00000259445	AC025219.1	0	0	0	0	0	0	0.004143	0	0
ENST00000624458	ENSG00000183643	C15orf32	0	0	0	0	0	0	0.005359	0	0
ENST00000556519	ENSG00000257060	AC091078.1	0	0	0	0	0	0	0.007095	0	0
ENST00000558621	ENSG00000259664	LINC02254	0	0	0	0	0	0	0.003222	0	0
ENST00000559569	ENSG00000259760	AC015660.2	0	0	0	0	0	0	0.029356	0	0.012251
ENST00000562516	ENSG00000261066	AC074052.2	0	0	0	0	0	0	0.06514	0	0
ENST00000571619	ENSG00000262801	U91319.1	0	0	0	0	0	0	0.00701	0	0
ENST00000562827	ENSG00000261682	AC145350.4	0	0	0	0	0	0	0.009199	0	0
ENST00000512279	ENSG00000250514	LINC02125	0	0	0	0	0	0	0.00361	0	0
ENST00000561510	ENSG00000260876	LINC01229	0	0	0	0	0	0	0.006043	0	0
ENST00000599486	ENSG00000268532	LINC02135	0	0	0	0	0	0	0.005282	0	0
ENST00000574133	ENSG00000262921	AC118754.3	0	0	0	0.01333	0	0	0.026179	0	0
ENST00000577684	ENSG00000220161	LINC02076	0	0	0	0	0	0	0.014419	0	0
ENST00000424109	ENSG00000236022	AC106017.1	0	0	0	0	0	0	0.056383	0	0.023881
ENST00000447506	ENSG00000236022	AC106017.1	0	0	0	0	0	0	0.006362	0	0
ENST00000582507	ENSG00000264262	AC131274.1	0	0	0	0	0	0	0.040016	0	0
ENST00000592081	ENSG00000267452	LINC02073	0	0	0	0	0	0	0.032303	0	0.007807
ENST00000412360	ENSG00000226364	LINC02089	0	0	0	0	0	0	0.011434	0	0
ENST00000621624	ENSG00000274198	AC025521.1	0	0	0	0	0	0	0.047844	0	0
ENST00000649128	ENSG00000285594	AP000902.2	0	0	0	0	0	0	0.018215	0	0
ENST00000584734	ENSG00000266604	LINC01887	0	0	0	0	0	0	0.003269	0	0
ENST00000577994	ENSG00000265485	LINC01915	0	0	0.003981	0	0	0	0.02019	0	0
ENST00000591558	ENSG00000267642	AC091198.1	0	0	0	0	0	0	0.007522	0	0
ENST00000465317	ENSG00000240663	RN7SL310P	0	0	0	0	0	0	0.011673	0	0
ENST00000585985	ENSG00000267172	AC022031.1	0	0	0	0	0	0	0.007229	0	0
ENST00000588449	ENSG00000267209	LINC01897	0	0	0	0	0	0	0.050357	0	0
ENST00000588794	ENSG00000267686	AC090771.2	0	0	0	0	0	0	0.008207	0	0
ENST00000588074	ENSG00000266952	LINC01538	0	0	0	0	0	0	0.003892	0	0
ENST00000592263	ENSG00000267723	AC011509.2	0	0	0	0	0	0	0.014549	0	0
ENST00000581538	ENSG00000263490	RN7SL155P	0	0	0	0	0	0	0.029102	0	0
ENST00000454455	ENSG00000237401	LINC01304	0	0	0	0	0	0	0.003819	0	0
ENST00000412528	ENSG00000205837	LINC00487	0	0	0	0	0	0	0.015931	0	0
ENST00000606959	ENSG00000272002	AC010904.2	0	0	0	0	0	0	0.014783	0	0
ENST00000414654	ENSG00000230515	AC092580.2	0	0	0	0	0	0	0.099849	0	0.015362
ENST00000441870	ENSG00000227047	AC012065.1	0	0	0	0	0	0	0.008451	0	0
ENST00000398796	ENSG00000214691	LINC01913	0	0	0	0	0	0	0.007767	0	0
ENST00000433065	ENSG00000224173	AC007422.1	0	0	0	0	0	0	0.013463	0	0
ENST00000652642	ENSG00000286211	AC098817.1	0	0	0	0	0	0	0.008926	0	0
ENST00000366278	ENSG00000229498	AC105053.1	0	0	0	0	0	0	0.005478	0	0
ENST00000632044	ENSG00000282033	AC074387.1	0	0	0	0	0	0	0.01674	0	0
ENST00000414159	ENSG00000235881	AC114776.1	0	0	0	0	0	0	0.004265	0	0
ENST00000457110	ENSG00000238207	AC009312.1	0	0	0	0	0	0	0.002999	0	0
ENST00000419362	ENSG00000235615	AJ239322.1	0	0	0	0	0	0.000916	0.01236	0.000916	0
ENST00000562796	ENSG00000260059	AC092620.2	0	0	0	0	0	0.002683	0.010172	0.002683	0
ENST00000450667	ENSG00000231040	LINC01911	0	0	0	0	0	0	0.005873	0	0
ENST00000486202	ENSG00000244372	RN7SL423P	0	0	0	0	0	0	0.00966	0	0
ENST00000604994	ENSG00000270460	AC106900.1	0	0	0	0	0	0	0.014783	0	0
ENST00000652637	ENSG00000286152	AC096555.1	0	0	0	0	0	0	0.007825	0	0
ENST00000413096	ENSG00000236116	AC064853.1	0	0	0	0	0	0	0.026701	0	0
ENST00000415226	ENSG00000233611	AC019068.1	0	0	0	0	0	0	0.016978	0	0
ENST00000435497	ENSG00000233354	LINC00028	0	0	0	0	0	0	0.015966	0	0
ENST00000428529	ENSG00000233277	LINC01728	0	0	0	0	0	0	0.017279	0	0
ENST00000651247	ENSG00000286179	AL139351.2	0	0	0	0	0	0	0.008822	0	0
ENST00000431460	ENSG00000231265	TRERNA1	0	0	0	0	0	0	0.025493	0	0
ENST00000434589	ENSG00000229925	AP001043.2	0	0	0	0	0	0	0.079192	0	0
ENST00000437426	ENSG00000225731	AP001627.1	0	0	0	0	0	0	0.004298	0	0
ENST00000617971	ENSG00000233056	ERVH48-1	0	0	0	0	0	0	0.004476	0	0
ENST00000626825	ENSG00000280623	PCAT14	0	0	0	0	0	0	0.005308	0	0
ENST00000434868	ENSG00000223704	LINC01422	0.001304	0	0	0	0	0	0.005428	0	0
ENST00000414969	ENSG00000232287	SLC6A1-AS1	0	0	0	0	0	0	0.015008	0	0
ENST00000462015	ENSG00000240203	RN7SL567P	0	0	0	0	0	0	0.015466	0	0
ENST00000471614	ENSG00000242009	AC129807.1	0	0	0	0	0	0	0.015858	0	0
ENST00000498457	ENSG00000241220	AC078788.1	0	0	0	0	0	0	0.044348	0	0
ENST00000608336	ENSG00000242512	LINC01206	0	0	0	0	0	0	0.004856	0	0
ENST00000430375	ENSG00000233308	OSTN-AS1	0	0	0	0	0	0	0.025417	0	0
ENST00000487718	ENSG00000242201	RN7SL215P	0	0	0	0	0	0	0.023273	0	0
ENST00000415869	ENSG00000225742	LINC02036	0	0	0	0	0	0	0.010299	0	0
ENST00000509453	ENSG00000249145	LINC02517	0	0	0	0	0	0	0.007788	0	0
ENST00000627163	ENSG00000281202	LINC01097	0	0	0	0	0	0	0.026485	0	0.003395
ENST00000510795	ENSG00000249599	BMPR1B-DT	0	0	0	0	0	0	0.071265	0	0
ENST00000508111	ENSG00000249464	LINC01091	0	0	0	0	0	0.007599	0.01647	0.007599	0
ENST00000515769	ENSG00000249464	LINC01091	0	0	0	0	0	0	0.014047	0	0.003678
ENST00000487657	ENSG00000248802	AC078850.2	0	0	0	0	0	0	0.037009	0	0
ENST00000513875	ENSG00000249618	LINC02465	0	0	0	0	0	0	0.005257	0	0.000378
ENST00000509628	ENSG00000251488	AC115622.1	0	0	0	0	0	0	0.008681	0	0
ENST00000652184	ENSG00000248869	LINC02511	0	0	0	0	0	0	0.015356	0	0
ENST00000505454	ENSG00000250126	AC116563.1	0	0	0	0	0	0	0.023667	0	0
ENST00000652265	ENSG00000286066	AC097375.4	0	0	0	0	0	0	0.005559	0	0
ENST00000512652	ENSG00000249425	LINC02477	0	0	0	0	0	0	0.006548	0	0
ENST00000502661	ENSG00000248551	AC095050.1	0	0	0	0	0	0	0.020346	0	0
ENST00000512036	ENSG00000250993	AC020551.1	0	0	0	0	0	0	0.017388	0	0
ENST00000504827	ENSG00000249174	AC106744.1	0	0	0	0	0	0	0.0426	0	0
ENST00000651229	ENSG00000286204	AC025475.2	0	0	0	0	0	0	0.009344	0	0
ENST00000506032	ENSG00000251033	AC113347.4	0	0	0	0	0	0	0.014941	0	0.004277
ENST00000511592	ENSG00000250806	AC027315.1	0	0	0	0	0	0	0.019983	0	0
ENST00000410774	ENSG00000222706	RN7SKP89	0	0	0	0	0	0	0.035113	0	0
ENST00000607389	ENSG00000272203	AC004775.1	0	0	0	0	0	0	0.024893	0	0.004401
ENST00000606992	ENSG00000216863	LY86-AS1	0	0	0	0	0	0	0.017197	0	0
ENST00000414875	ENSG00000227920	AL353597.1	0	0	0	0	0	0	0.003881	0	0
ENST00000437859	ENSG00000235122	AL121974.1	0	0	0	0	0	0	0.020548	0	0
ENST00000418403	ENSG00000237643	AL365226.2	0	0	0	0	0	0	0.023607	0	0
ENST00000651663	ENSG00000286042	LCAL1	0	0	0	0	0	0	0.002412	0	0
ENST00000519050	ENSG00000253405	EVX1-AS	0	0	0	0	0	0	0.016271	0	0
ENST00000447171	ENSG00000223813	AC007255.1	0	0	0	0	0	0	0.003039	0	0
ENST00000415356	ENSG00000235728	AC007349.3	0	0	0	0	0	0	0.010748	0	0
ENST00000648455	ENSG00000285741	AC005999.2	0	0	0	0	0	0	0.004237	0	0
ENST00000458615	ENSG00000231427	LINC01445	0	0	0	0	0	0	0.011042	0	0
ENST00000440744	ENSG00000230649	AC024084.1	0	0	0	0	0	0	0.001819	0	0
ENST00000435996	ENSG00000232053	AC078845.1	0	0.012687	0	0	0	0	0.066854	0	0
ENST00000649319	ENSG00000285524	AC073236.1	0	0	0	0	0	0	0.007676	0	0
ENST00000518926	ENSG00000254007	AC084768.1	0	0	0	0	0	0	0.020308	0	0
ENST00000521218	ENSG00000254153	AC103957.2	0	0	0	0	0	0	0.027917	0	0
ENST00000522743	ENSG00000253585	AP003351.1	0	0	0	0	0	0	0.01403	0	0
ENST00000648647	ENSG00000253220	AC084116.1	0	0	0	0	0	0	0.037166	0	0
ENST00000522667	ENSG00000229140	CCDC26	0	0	0	0	0	0	0.017291	0	0
ENST00000452746	ENSG00000236511	LINC01231	0	0	0	0	0	0	0.007286	0	0
ENST00000649120	ENSG00000285637	AL161449.2	0	0	0	0	0	0	0.007592	0	0
ENST00000428006	ENSG00000226197	AL583785.1	0	0	0	0	0	0	0.027457	0	0
ENST00000435092	ENSG00000236921	AL157937.1	0	0.007302	0	0	0	0.008687	0.080609	0.008687	0
ENST00000523363	ENSG00000254261	AL451137.1	0	0	0	0	0	0	0.037799	0	0
ENST00000563268	ENSG00000260454	AL355607.2	0	0	0	0	0	0	0.016594	0	0.005079
ENST00000366188	ENSG00000203364	AL390760.1	0	0	0	0	0	0	0.054445	0	0.023778
ENST00000635678	ENSG00000283001	AL450426.1	0	0	0	0	0	0	0.007882	0	0
ENST00000483093	ENSG00000244104	RN7SL659P	0	0	0	0	0	0	0.031345	0	0
ENST00000422914	ENSG00000236120	AC110995.1	0	0	0.010745	0	0	0	0.03767	0	0.00835
TCONS_00001705	ENSG00000116151	MORN1	0	0	0	0	0	0	0.057851	0	0
TCONS_00023395	ENSG00000227868	TEX46	0	0.00691	0	0	0.003387	0	0.064315	0	0
TCONS_00023856	ENSG00000158008	EXTL1	0	0	0	0	0.021739	0.012126	0.090534	0.012126	0.015208
TCONS_00024567	XLOC_009913	XLOC_009913	0	0	0	0	0	0	0.133085	0	0
TCONS_00025091	XLOC_010097	XLOC_010097	0	0	0	0.000767	0	0	0.016736	0	0
TCONS_00006089	XLOC_002633	XLOC_002633	0	0	0	0	0.04062	0	0.062204	0	0
TCONS_00025588	ENSG00000117016	RIMS3	0.022826	0.02151	0.005354	0	0.011921	0.017235	0.262709	0.017235	0.029361
TCONS_00027725	ENSG00000033122	LRRC7	0	0	0	0	0	0	0.244397	0	0
TCONS_00028239	XLOC_011347	XLOC_011347	0	0	0	0	0	0	0.148111	0	0.006061
TCONS_00029322	XLOC_011838	XLOC_011838	0	0	0	0	0	0	0.095356	0	0
TCONS_00011314	XLOC_004637	XLOC_004637	0	0.011517	0.006169	0	0.005458	0	0.082647	0	0.0058
TCONS_00011440	ENSG00000177551	NHLH2	0	0	0.016488	0	0	0.042003	0.106552	0.042003	0
TCONS_00012047	XLOC_004989	XLOC_004989	0	0.006795	0.006489	0.001736	0.000925	0.000899	0.05201	0.000899	0.000874
TCONS_00013972	ENSG00000163467	TSACC	0	0	0	0	0.034605	0	0.093503	0	0
TCONS_00014208	ENSG00000163554	SPTA1	0	0	0	0	0	0	0.194191	0	0
TCONS_00014838	XLOC_005870	XLOC_005870	0	0	0	0	0	0	0.078566	0	0
TCONS_00015227	XLOC_006067	XLOC_006067	0	0	0	0	0	0	0.159125	0	0
TCONS_00034905	ENSG00000143322	ABL2	0.004918	0	0.003408	0	0	0.000947	0.159991	0.000947	0
TCONS_00035479	ENSG00000162687	KCNT2	0	0	0	0	0	0.002565	0.08168	0.002565	0
TCONS_00017077	XLOC_006915	XLOC_006915	0.023938	0	0	0	0.015693	0	0.129017	0	0.026583
TCONS_00048462	ENSG00000120549	KIAA1217	0	0	0	0	0	0	0.121691	0	0
TCONS_00041460	ENSG00000198915	RASGEF1A	0	0	0.005936	0	0	0	0.080525	0	0
TCONS_00041837	XLOC_017308	XLOC_017308	0	0	0.043872	0	0	0	0.144168	0	0.026132
TCONS_00050141	ENSG00000072401	UBE2D1	0	0	0	0	0	0	2.24123	0	0
TCONS_00042638	ENSG00000138346	DNA2	0	0	0	0	0	0	0.111811	0	0
TCONS_00043423	ENSG00000148655	LRMDA	0.001239	0	0	0	0	0.003786	0.01401	0.003786	0.001205
TCONS_00044485	ENSG00000138193	PLCE1	0.034194	0	0.010461	0	0	0	0.088342	0	0
TCONS_00045510	ENSG00000120051	CFAP58	0.007158	0.007772	0.002165	0	0	0.00308	0.127639	0.00308	0.005278
TCONS_00046135	ENSG00000107518	ATRNL1	0	0	0	0	0	0	0.081818	0	0
TCONS_00056006	ENSG00000166341	DCHS1	0	0	0	0	0	0	0.108169	0	0
TCONS_00067502	ENSG00000149050	ZNF214	0	0	0	0	0	0	0.058791	0	0
TCONS_00056015	ENSG00000279486	OR2AG1	0	0	0	0	0.019268	0	0.080447	0	0
TCONS_00057698	ENSG00000110427	KIAA1549L	0	0.006241	0.06006	0	0	0.010461	0.1494	0.010461	0
TCONS_00057804	XLOC_024324	XLOC_024324	0	0	0	0.00246	0	0	0.181466	0	0
TCONS_00069539	ENSG00000110436	SLC1A2	0	0	0	0	0	0	0.079562	0	0
TCONS_00060957	ENSG00000174669	SLC29A2	0.01005	0.008681	0	0	0	0	0.08368	0	0
TCONS_00061147	XLOC_025464	XLOC_025464	0	0	0	0	0	0	0.141431	0	0.054146
TCONS_00061619	ENSG00000172927	MYEOV	0	0	0	0	0	0.019368	0.087828	0.019368	0
TCONS_00062807	XLOC_026036	XLOC_026036	0	0	0	0	0	0	0.090698	0	0
TCONS_00074943	XLOC_030532	XLOC_030532	0	0	0.044519	0	0	0	0.074484	0	0
TCONS_00063193	XLOC_026166	XLOC_026166	0	0	0	0	0	0	0.089829	0	0
TCONS_00063195	XLOC_026166	XLOC_026166	0	0	0	0	0	0	0.107539	0	0.027218
TCONS_00065208	ENSG00000248712	CCDC153	0	0	0	0	0	0	0.080794	0	0
TCONS_00077713	ENSG00000170325	PRDM10	0.000275	0.036381	0	0.00154	0	0.000685	0.209745	0.000685	0.018716
TCONS_00079898	ENSG00000008394	MGST1	0.001143	1.2e-05	1e-06	0.000847	3e-06	0	0.055415	0	0.010872
TCONS_00080600	ENSG00000110900	TSPAN11	0	0	0	0	0	0	0.101441	0	0
TCONS_00091879	ENSG00000139174	PRICKLE1	0	0.015311	0	0.023872	0	0	0.097598	0	0
TCONS_00081272	XLOC_033063	XLOC_033063	0.002501	0.007685	0	0	0	0.005156	0.118317	0.005156	0.040695
TCONS_00093714	ENSG00000135426	TESPA1	0.015184	0.011892	0	0	0.012875	0.053857	0.174188	0.053857	0
TCONS_00094756	ENSG00000196935	SRGAP1	0	0	0	0	0	0	0.093306	0	0
TCONS_00095340	XLOC_038184	XLOC_038184	0.005462	0	0	0	0	0	0.088392	0	0
TCONS_00096536	XLOC_038808	XLOC_038808	0	0	0	0	0	0.043523	0.2348	0.043523	0.034368
TCONS_00096904	ENSG00000204954	C12orf73	0	0	0	0	0	0	0.017079	0	0
TCONS_00097374	XLOC_039116	XLOC_039116	0.035567	0	0	0	0	0	0.17722	0	0
TCONS_00097937	XLOC_039272	XLOC_039272	0	0.033332	0	0	0	0	0.177898	0	0.010163
TCONS_00097941	XLOC_039272	XLOC_039272	0	0	0	0	0	0.028994	0.081366	0.028994	0
TCONS_00087371	ENSG00000122966	CIT	0	0	0	0	0	0	0.16969	0	0
TCONS_00088265	ENSG00000139364	TMEM132B	0.026265	0.014748	0	0	0.026407	0.002453	0.160494	0.002453	0
TCONS_00100001	XLOC_040045	XLOC_040045	0	0	0	0	0	0.001436	0.138369	0.001436	0
TCONS_00105534	ENSG00000139656	SMIM2	0	0.030293	0	0.013537	0	0	0.11387	0	0
TCONS_00105618	ENSG00000180332	KCTD4	0	0	0	0	0	0	0.612022	0	0
TCONS_00106166	ENSG00000102786	INTS6	0	0	0	0	0	0	0.114054	0	0
TCONS_00102161	XLOC_041096	XLOC_041096	0.022599	0	0	0	0	0.022338	0.107385	0.022338	0.012108
TCONS_00106834	XLOC_043475	XLOC_043475	0	0	0	0	0	0	0.099969	0	0.014283
TCONS_00103404	XLOC_041768	XLOC_041768	0	0	0	0	0	0	0.13417	0	0.018184
TCONS_00115927	XLOC_047127	XLOC_047127	0	0	0	0.008218	0.009601	0.014347	0.177063	0.014347	0
TCONS_00116922	XLOC_047469	XLOC_047469	0	0	0	0	0	0	0.129658	0	0.037022
TCONS_00118535	ENSG00000198133	TMEM229B	0	0	0	0	0	0.012487	0.099296	0.012487	0
TCONS_00111945	ENSG00000197555	SIPA1L1	0.007625	0	0	0	0.012966	0.009408	0.162951	0.009408	0.010775
TCONS_00118901	XLOC_048412	XLOC_048412	0	0	0	8.5e-05	0	7.1e-05	0.338297	7.1e-05	0.008525
TCONS_00112361	XLOC_045890	XLOC_045890	0	0	0	0	0	0.006547	0.081514	0.006547	0.005337
TCONS_00112857	XLOC_046089	XLOC_046089	0.008035	0	0	0	0	0	1.09322	0	0.007554
TCONS_00120563	ENSG00000197249	SERPINA1	0	0	0	0	0	0	0.061906	0	0
TCONS_00114405	ENSG00000131323	TRAF3	0.275308	0.013118	0.013471	0.010435	0.095306	0.110204	0.905884	0.110204	0.031999
TCONS_00129024	ENSG00000248905	FMN1	0	0	0	0	0	0.011868	0.053086	0.011868	0
TCONS_00123420	ENSG00000103978	TMEM87A	0	0	0	0	0	0	0.095525	0	0
TCONS_00123421	ENSG00000214013	GANC	0	0	0	0	0	0.001248	0.011695	0.001248	0.001714
TCONS_00131120	ENSG00000285253	AC090517.4	0	0	0	0	0	0	0.001969	0	0
TCONS_00131192	ENSG00000128918	ALDH1A2	0	0	0	0	0	0	0.013104	0	0
TCONS_00132059	XLOC_053392	XLOC_053392	0	0	0	0	0	0	0.127223	0	0
TCONS_00132072	XLOC_053396	XLOC_053396	0.011196	0	0.006778	0.00464	0.033383	0.007941	0.128545	0.007941	0
TCONS_00132140	XLOC_053434	XLOC_053434	0	0	0	0	0.020285	0	0.08759	0	0
TCONS_00132145	ENSG00000033800	PIAS1	0	0	0	0	0	0	0.11542	0	0
TCONS_00126858	ENSG00000197978	GOLGA6L9	0	0	0	0	0	0	0.204666	0	0
TCONS_00137187	ENSG00000038532	CLEC16A	0.024183	0.006658	0.010739	0	0	0	0.082486	0	0
TCONS_00146428	XLOC_057700	XLOC_057700	0	0	0	0	0	0	0.169017	0	0
TCONS_00151654	ENSG00000103196	CRISPLD2	0	0	0.031353	0	0	0	0.08368	0	0
TCONS_00143405	ENSG00000179588	ZFPM1	0.006672	0	0	0	0	0.018841	0.126647	0.018841	0.017497
TCONS_00152136	ENSG00000176715	ACSF3	0	0	0	0	0.001525	0	0.003546	0	0
TCONS_00154921	ENSG00000180638	SLC47A2	0	0	0	0	0	0	0.08368	0	0
TCONS_00165914	ENSG00000260458	KCNJ18	0	0	0	0	0	0.02886	0.172126	0.02886	0
TCONS_00156699	ENSG00000125686	MED1	0	0	0	0	0	0	0.079397	0	0.032178
TCONS_00167912	XLOC_064526	XLOC_064526	0	0	0	0	0	0.040049	0.087864	0.040049	0
TCONS_00157092	ENSG00000173805	HAP1	0	0	0	0.02355	0	0	0.116665	0	0.02581
TCONS_00168564	XLOC_064697	XLOC_064697	0	0	0	0	0	0	0.078757	0	0
TCONS_00169021	XLOC_064819	XLOC_064819	0	0	0	0	0	0	0.074824	0	0
TCONS_00169384	ENSG00000178852	EFCAB13	0.01876	0.013276	0	0	0	0	0.055786	0	0
TCONS_00171422	XLOC_065651	XLOC_065651	0	0.011596	0	0	0.005234	0	0.089258	0	0
TCONS_00174705	XLOC_066639	XLOC_066639	0	0	0	0	0	0	0.118571	0	0.014172
TCONS_00174706	XLOC_066639	XLOC_066639	0	0	0	0	0	0	0.176175	0	0
TCONS_00175041	ENSG00000168675	LDLRAD4	0	0	0	0	0	0	0.010994	0	0
TCONS_00175301	ENSG00000158201	ABHD3	0	0	0	0	0	0	0.174923	0	0
TCONS_00179299	XLOC_068731	XLOC_068731	0	0	0.024767	0	0	0	0.128142	0	0
TCONS_00179407	ENSG00000141441	GAREM1	0	0.006729	0	0.002415	0.008447	0.004424	0.068577	0.004424	0.00457
TCONS_00179739	XLOC_068909	XLOC_068909	0.003905	0	0	0	0	0.000582	0.123015	0.000582	0.013566
TCONS_00176423	ENSG00000184828	ZBTB7C	0	0	0	0	0	0	0.143164	0	0.020346
TCONS_00176467	ENSG00000101665	SMAD7	0	0	0	0	0	0	0.589977	0	0
TCONS_00177424	XLOC_067864	XLOC_067864	0	0	0	0	0.031591	0	0.093935	0	0
TCONS_00177559	XLOC_067956	XLOC_067956	0	0	0	0	0.024065	0	0.085983	0	0
TCONS_00182779	ENSG00000284638	AC005551.1	0	0	0	0	0	0	0.117523	0	0
TCONS_00184943	ENSG00000072071	ADGRL1	0	0	0	0	0	0	0.171646	0	0.000669
TCONS_00198934	ENSG00000245680	ZNF585B	0	0	0	0	0	0	0.008578	0	0
TCONS_00190287	XLOC_072467	XLOC_072467	0	0.254812	0	0	0	0.276918	0.94153	0.276918	0
TCONS_00204138	ENSG00000151692	RNF144A	0	0	0	0	0	0	0.168845	0	7.4e-05
TCONS_00204537	XLOC_076526	XLOC_076526	0	0.014844	0	0	0	0	0.110843	0	0
TCONS_00204556	ENSG00000162981	FAM84A	0	0	0	0	0	0	0.004964	0	0
TCONS_00222227	XLOC_083978	XLOC_083978	0	0	0	0	0	0	0.085201	0	0.028001
TCONS_00206998	XLOC_077603	XLOC_077603	0	0	0	0	0	0	0.157003	0	0.044133
TCONS_00207090	ENSG00000177994	C2orf73	0	0	0	0	0	0	0.01743	0	0.005673
TCONS_00222536	ENSG00000115239	ASB3	0	0	0.049407	0	0	0	0.176545	0	0.045411
TCONS_00208509	XLOC_078182	XLOC_078182	0	0	0	0	0	0	0.113495	0	0
TCONS_00210909	ENSG00000144152	FBLN7	0.005044	0.003287	0	0	0	0	0.015141	0	0
TCONS_00227053	XLOC_085963	XLOC_085963	0	0.040462	0	0	0	0.016409	0.123303	0.016409	0
TCONS_00227496	ENSG00000136731	UGGT1	0	0	0	0.085994	0	0.063381	0.381685	0.063381	0
TCONS_00213317	ENSG00000007001	UPP2	0	0	0	0	0.06071	0	0.151367	0	0.001513
TCONS_00230880	XLOC_087757	XLOC_087757	0.019854	0	0.025533	0.012715	0	0	0.108648	0	0
TCONS_00216349	ENSG00000178385	PLEKHM3	0	0	0	0	0	0	0.064413	0	0
TCONS_00217546	ENSG00000152056	AP1S3	0	0	0	0	0	0	0.135828	0	0
TCONS_00217583	ENSG00000135905	DOCK10	0	0	0	0	0	0	0.138627	0	0
TCONS_00235292	XLOC_089641	XLOC_089641	0.01045	0	0	0	0	0	0.079763	0	0
TCONS_00240308	ENSG00000125864	BFSP1	0	0.004735	0	0	0	0	0.021838	0	0.003593
TCONS_00240347	XLOC_091728	XLOC_091728	0	0.047451	0	0	0	0	0.141976	0	0
TCONS_00240350	XLOC_091728	XLOC_091728	0	0	0	0	0	0	0.075079	0	0
TCONS_00235752	XLOC_089842	XLOC_089842	0	0	0	0	0	0	0.105305	0	0
TCONS_00241100	XLOC_092119	XLOC_092119	0	0	0	0	0	0	0.434913	0	0
TCONS_00236023	XLOC_090002	XLOC_090002	0	0	0.000323	0.017642	0.021957	0.054043	0.223519	0.054043	0.02982
TCONS_00236040	ENSG00000215547	DEFB115	0	0.000812	0.010962	0.024286	0.020375	0	0.176658	0	0
TCONS_00236550	ENSG00000125966	MMP24	0	0	0	0	0	0	0.313722	0	0
TCONS_00237814	XLOC_090595	XLOC_090595	0	0	0	0	0	0	0.112946	0	0.000569
TCONS_00243557	XLOC_093251	XLOC_093251	0.021349	0	0	0	0	0	0.08759	0	0
TCONS_00244019	XLOC_093415	XLOC_093415	0	0	0	0	0	0	0.12779	0	0
TCONS_00244427	XLOC_093579	XLOC_093579	0	0	0	0	0	0.010213	0.154619	0.010213	0.000121
TCONS_00245453	XLOC_094151	XLOC_094151	0	0.02113	0	0	0	0	0.07909	0	0.016214
TCONS_00245918	XLOC_094297	XLOC_094297	0	0	0	0	0	0	0.168638	0	0
TCONS_00246086	ENSG00000183486	MX2	0	0	0	0	0	0	0.770294	0	0.273466
TCONS_00246176	XLOC_094421	XLOC_094421	0	0	0	0	0	0	0.148394	0	0
TCONS_00249010	XLOC_095659	XLOC_095659	0	0	0	0	0	0	0.083683	0	0
TCONS_00251375	XLOC_096596	XLOC_096596	0	0	0	0	0.032531	0	0.066103	0	0
TCONS_00252481	XLOC_097045	XLOC_097045	0	0	0	0	0	0	0.135121	0	0
TCONS_00258452	ENSG00000175928	LRRN1	0	0	0	0	0	0	0.653677	0	0
TCONS_00258453	ENSG00000175928	LRRN1	0	0	0	0	0	0	0.912229	0	0
TCONS_00258454	ENSG00000175928	LRRN1	0	0	0	0	0	0	1.48236	0	0
TCONS_00258672	ENSG00000182533	CAV3	0	0	0	0	0	0	0.20509	0	0
TCONS_00271405	ENSG00000157017	GHRL	0	0	0	0	0	0	0.018476	0	0
TCONS_00271658	XLOC_104292	XLOC_104292	0	0.013699	0	0	0	0	0.089684	0	0.025084
TCONS_00259409	XLOC_099396	XLOC_099396	0	0	0	0	0	0	0.031904	0	0
TCONS_00260399	ENSG00000153558	FBXL2	0.003358	0.003068	0.002363	0.135346	0.002359	0.002733	0.245869	0.002733	0.00402
TCONS_00273269	XLOC_104985	XLOC_104985	0	0	0	0	0	0	0.0957	0	0
TCONS_00261308	ENSG00000160746	ANO10	0	0	0	0	0	0	0.131298	0	0
TCONS_00263097	XLOC_100615	XLOC_100615	0	0	0	0	0	0	0.081852	0	0
TCONS_00275758	XLOC_105638	XLOC_105638	0	0	0	0	0.032913	0	0.091883	0	0
TCONS_00264675	ENSG00000170044	ZPLD1	0	0	0	0	0	0	0.093079	0	0
TCONS_00277011	XLOC_106369	XLOC_106369	0.000248	0	0	0	0	0	0.001003	0	0
TCONS_00264732	XLOC_101456	XLOC_101456	0	0	0	0	0	0	0.016551	0	0
TCONS_00277228	XLOC_106545	XLOC_106545	0	0	0	0	0	0	0.018744	0	0
TCONS_00278639	ENSG00000159685	CHCHD6	0	0	0	0	0	0	0.090464	0	0.012714
TCONS_00279134	ENSG00000170819	BFSP2	0	0	0	0	0	0.026521	0.124757	0.026521	0
TCONS_00267075	ENSG00000177311	ZBTB38	0	0	0	0	0	0	1e-06	0	0
TCONS_00279887	XLOC_107631	XLOC_107631	0	0	0	0	0	0	0.093721	0	0
TCONS_00280354	XLOC_107860	XLOC_107860	0	0	0	0	0.003913	0.072114	0.413142	0.072114	0.077166
TCONS_00269954	ENSG00000073849	ST6GAL1	0	0	0	0	0	0	0.080447	0	0
TCONS_00282658	ENSG00000185112	FAM43A	0	0	0	0	0	0	0.083094	0	0
TCONS_00283398	XLOC_109072	XLOC_109072	0	0	0.014007	0.023861	0	0	0.078923	0	0.009658
TCONS_00284559	XLOC_109510	XLOC_109510	0	0	0	0	0	0.00279	0.168517	0.00279	0
TCONS_00292947	XLOC_113499	XLOC_113499	0	0	0	0	0	0	0.105838	0	0
TCONS_00285000	XLOC_109684	XLOC_109684	0	0	0	0	0.044243	0	0.0899	0	0.007476
TCONS_00293606	ENSG00000168228	ZCCHC4	0	0	0	0	0	0	0.025869	0	0
TCONS_00285722	XLOC_110039	XLOC_110039	0	0.044575	0	0	0.014689	0	0.201471	0	0.04606
TCONS_00294331	XLOC_114241	XLOC_114241	0	0	0	0	0	0	0.028463	0	0
TCONS_00286030	XLOC_110213	XLOC_110213	0	0	0	0	0	0.003235	0.166154	0.003235	0.046764
TCONS_00295111	ENSG00000145242	EPHA5	0	0	0	0	0	0	0.14529	0	0
TCONS_00295252	ENSG00000171234	UGT2B7	0	0	0	0	0	0	0.067333	0	0
TCONS_00295481	ENSG00000174808	BTC	0.034774	0	0.026164	0	0.030922	0	0.155391	0	0.000903
TCONS_00297455	XLOC_115517	XLOC_115517	0	0	0	0	0	0	0.026871	0	0
TCONS_00289609	ENSG00000153130	SCOC	0	0	0	0	0	0	4.86587	0	0
TCONS_00299078	ENSG00000137460	FHDC1	0	0.040818	0	0	0	0	0.144153	0	0
TCONS_00299194	XLOC_116352	XLOC_116352	0	0	0	0	0	0.009689	0.074055	0.009689	0.004144
TCONS_00299640	XLOC_116605	XLOC_116605	0.002918	0	0	0	0	0	0.082023	0	0.008211
TCONS_00291384	XLOC_112781	XLOC_112781	0	0	0	0	0	0	0.109821	0	0.025691
TCONS_00300066	ENSG00000218336	TENM3	0	0	0	0	0	0	0.08759	0	0
TCONS_00312266	XLOC_122416	XLOC_122416	0	0.009385	0	0	0.000372	0.000551	0.214277	0.000551	0
TCONS_00302701	ENSG00000170571	EMB	0	0	0	0	0	0	0.124917	0	0
TCONS_00302744	XLOC_118237	XLOC_118237	0	0	0	0	0	0	0.111242	0	0
TCONS_00303102	XLOC_118448	XLOC_118448	0.007915	0	0	0	0	0	0.08559	0	0
TCONS_00314392	XLOC_123592	XLOC_123592	0.007832	0	0	0	0	0.013712	0.185598	0.013712	0.045043
TCONS_00304146	XLOC_118892	XLOC_118892	0.018707	0	0	0	0	0	0.119835	0	0
TCONS_00315524	XLOC_124157	XLOC_124157	0	0	0	0	0	0	0.083871	0	0
TCONS_00316019	XLOC_124404	XLOC_124404	0	0	0	0	0	0	0.087854	0	0
TCONS_00319717	ENSG00000204928	GRXCR2	0	0	0	0	0	0	0.123273	0	0
TCONS_00320590	XLOC_126567	XLOC_126567	0	0	0	0	0	0	0.042484	0	0
TCONS_00309503	ENSG00000170624	SGCD	0	0	0.165519	0	0	0	0.95516	0	0.109781
TCONS_00309904	XLOC_121427	XLOC_121427	0	0	0	0	0	0	0.127402	0	0
TCONS_00321164	XLOC_126872	XLOC_126872	0	0	0	0	0	0	0.059569	0	0
TCONS_00322197	ENSG00000196670	ZFP62	0	0	0	0	0	0	0.063056	0	0
TCONS_00322201	ENSG00000196670	ZFP62	0	0	0	0	0	0	0.084067	0	0
TCONS_00322194	ENSG00000196670	ZFP62	0.000726	0.004791	0	0.006968	0.004309	0.012082	0.104984	0.012082	0.021892
TCONS_00334229	ENSG00000124788	ATXN1	0	0	0.006042	0	0	0	0.076752	0	0
TCONS_00334591	ENSG00000079691	CARMIL1	0	0	0	0	0	0	0.099794	0	0
TCONS_00334843	XLOC_133542	XLOC_133542	0	0	0.01625	0	0	0	0.248267	0	0
TCONS_00336332	ENSG00000161896	IP6K3	0.008684	0	0	0	0.003827	0.020111	0.094657	0.020111	0
TCONS_00326926	XLOC_129205	XLOC_129205	0	0.013922	0	0	0	0	0.051828	0	0.009863
TCONS_00326919	ENSG00000124813	RUNX2	0	0	0	0	0	0	0.022957	0	0
TCONS_00337461	ENSG00000146233	CYP39A1	0.001228	0	0.004195	0.013293	0.002375	0	0.31899	0	0.007618
TCONS_00327480	XLOC_129492	XLOC_129492	0	0	0	0	0	0	0.109394	0	0
TCONS_00338864	XLOC_135301	XLOC_135301	0	0	0	0	0	0	0.268749	0	0
TCONS_00340286	XLOC_136064	XLOC_136064	0.004108	0	0	0	0	0	0.088835	0	0
TCONS_00340296	XLOC_136063	XLOC_136063	0	0	0	0	0	0	0.076684	0	0
TCONS_00340364	XLOC_136115	XLOC_136115	0	0	0	0	0	0.013391	0.116122	0.013391	0
TCONS_00340659	ENSG00000196591	HDAC2	0.068197	0.034814	0.028075	0	0.044409	0.03651	3.93423	0.03651	0.047857
TCONS_00332202	ENSG00000091844	RGS17	0	0	0	0	0	0.030145	0.112241	0.030145	0.00797
TCONS_00343344	ENSG00000112541	PDE10A	0	0	0.03735	0	0	0	0.11195	0	0
TCONS_00343395	ENSG00000060762	MPC1	0	0	0	0	0	0.023118	1.06697	0.023118	0.011336
TCONS_00346233	XLOC_138650	XLOC_138650	0	0	0	0	0	0	0.168414	0	0
TCONS_00357145	ENSG00000146648	EGFR	0.124686	0	0	0	0	0	0.191663	0	0
TCONS_00359161	XLOC_144007	XLOC_144007	0	0	0	0	0	0	0.128628	0	0
TCONS_00350317	ENSG00000205238	SPDYE2	0	0	0.002719	0	0	0	0.15947	0	0.00106
TCONS_00352091	ENSG00000189320	FAM180A	0	0	0.008024	0	0	0	0.111967	0	0
TCONS_00353044	ENSG00000204946	ZNF783	0.00439	0	0	0.017167	0	0	0.089152	0	0
TCONS_00363054	XLOC_145556	XLOC_145556	0	0	0	0	0	0	0.122913	0	0
TCONS_00353195	ENSG00000106560	GIMAP2	0	0	0	0	0	0	0.098713	0	0
TCONS_00373713	XLOC_150175	XLOC_150175	0	0	0.003513	0	0.008613	0.005494	0.074966	0.005494	0
TCONS_00375301	XLOC_151043	XLOC_151043	0	0.019741	0.003524	0	0	0.016925	0.133625	0.016925	0
TCONS_00375571	ENSG00000165084	C8orf34	0	0	0	0	0	0.01461	0.144504	0.01461	0.032401
TCONS_00376026	ENSG00000104432	IL7	0	0	0	0	0	0	0.100299	0	0
TCONS_00368362	XLOC_147894	XLOC_147894	0	0	0	0	0	0.02345	0.135371	0.02345	0
TCONS_00369148	XLOC_148251	XLOC_148251	0	0	0	0	0	0	0.113057	0	0.024234
TCONS_00369151	ENSG00000104361	NIPAL2	0	0	0	0	0	0	0.093982	0	0
TCONS_00377566	XLOC_152132	XLOC_152132	0.008122	0	0	0	0	0	0.09899	0	0.023013
TCONS_00370102	XLOC_148746	XLOC_148746	0	0	0	0	0.021109	0	0.300179	0	0.098869
TCONS_00370146	XLOC_148771	XLOC_148771	0	0.000739	0	0	0	0	0.080206	0	0
TCONS_00370201	ENSG00000156787	TBC1D31	0	0	0	0	0	0	0.386756	0	0
TCONS_00379185	ENSG00000184156	KCNQ3	0	0	0	0	0	0.016304	0.114625	0.016304	0.014977
TCONS_00379730	ENSG00000171045	TSNARE1	0	0	0	0.054056	0	0.026465	0.167068	0.026465	0
TCONS_00389110	XLOC_157305	XLOC_157305	0	0	0	0	0	0	0.086294	0	0
TCONS_00389401	ENSG00000099219	ERMP1	0.020376	0	0	0	0	0	0.052689	0	0
TCONS_00389963	ENSG00000171855	IFNB1	0	0	0	0	0.024425	0	0.08993	0	0
TCONS_00381651	XLOC_153885	XLOC_153885	0.015047	0.014835	0	0	0.021658	0.027383	0.186822	0.027383	0.015719
TCONS_00394032	XLOC_159880	XLOC_159880	0	0	0	0	0	0.029757	0.133904	0.029757	0
TCONS_00385979	ENSG00000198121	LPAR1	0	0.041812	0	0	0	0	0.156337	0	0.040581
TCONS_00394922	XLOC_160415	XLOC_160415	0	0	0	0	0	0	0.093222	0	0
TCONS_00386370	XLOC_156475	XLOC_156475	0	0.020445	0	0	0.019218	0.013627	0.15438	0.013627	0.01501
TCONS_00386411	ENSG00000136861	CDK5RAP2	0	0	0	0	0	0.02769	0.083308	0.02769	0
TCONS_00386930	ENSG00000136895	GARNL3	0	0	0	0	0	0.001106	0.165035	0.001106	0
TCONS_00388238	XLOC_157070	XLOC_157070	0	0	0	0	0	0.012195	0.084433	0.012195	0.008004
TCONS_00404804	XLOC_164998	XLOC_164998	0	0	0	0	0	0	0.124632	0	0.037262
TCONS_00404951	ENSG00000101916	TLR8	0	0.01183	0	0	0	0	0.107549	0	0.022757
TCONS_00398094	XLOC_161675	XLOC_161675	0	0	0	0	0	0.033503	0.161588	0.033503	0
TCONS_00405197	ENSG00000285602	AC097625.2	0	0	0	0	0	0	0.056916	0	0
TCONS_00405216	XLOC_165197	XLOC_165197	0	9.8e-05	0	0.033979	0.023544	0	0.245679	0	0.018637
TCONS_00405233	XLOC_165208	XLOC_165208	0	0.018969	0	0	0	0	0.062684	0	0
TCONS_00406133	XLOC_165720	XLOC_165720	0	0	0	0	0	0	0.156202	0	0.060041
TCONS_00400051	ENSG00000155622	XAGE2	0	0	0	0	0	0	0.0629	0	0
TCONS_00410107	ENSG00000156500	FAM122C	0	0.012214	0	0	0	0	0.084449	0	0
TCONS_00403842	ENSG00000268916	CSAG3	0.004782	0.03608	0	0.051368	0	0	0.34689	0	0.042379
TCONS_00403850	ENSG00000268916	CSAG3	0	0	0	0	0	0	0.084727	0	0.014395
TCONS_00412060	XLOC_168774	XLOC_168774	0	0	0	0	0	0	0.046984	0	0
TCONS_00000748	XLOC_000559	XLOC_000559	0	0	0	0	0.00588	0	0.085884	0	0
TCONS_00000459	XLOC_000337	XLOC_000337	0	0	0	0	0	0	0.156654	0	0.046921
TCONS_00000931	XLOC_000676	XLOC_000676	0	0	0	0	0	0.012429	0.351437	0.012429	0
TCONS_00000932	XLOC_000676	XLOC_000676	0	0	0	0	0	0	0.157696	0	0.006522
TCONS_00000001	XLOC_000001	XLOC_000001	0	0	0.01891	0	0	0	0.342452	0	0
TCONS_00000706	XLOC_000517	XLOC_000517	0	0	0	0	0.043258	0	0.234714	0	0.048496
TCONS_00000807	XLOC_000608	XLOC_000608	0	0	0	0	0	0	373.53	0	0
TCONS_00000823	XLOC_000608	XLOC_000608	0	0	0	1.47284	0	0	35.51	0	0
TCONS_00000246	XLOC_000164	XLOC_000164	0	0	0	0	0	0	0.073583	0	0
TCONS_00000387	XLOC_000270	XLOC_000270	0.014431	0	0	0	0	0	0.102532	0	0.013196
TCONS_00000598	XLOC_000446	XLOC_000446	0	0	0	0	0	0	0.089846	0	0
TCONS_00028062	XLOC_011248	XLOC_011248	0	0	0	0	0	0.026522	0.080104	0.026522	0
TCONS_00011518	XLOC_004753	XLOC_004753	0	0	0.018451	0	0	0	0.137643	0	0
TCONS_00032217	ENSG00000184148	SPRR4	0	0	0	0	0	0	0.082211	0	0
TCONS_00015534	XLOC_006179	XLOC_006179	0	0	0	0	0	0	0.080104	0	0
TCONS_00036761	XLOC_014872	XLOC_014872	0	0	0	0	0	0	0.120788	0	0
TCONS_00048199	XLOC_020167	XLOC_020167	0	0	0	0	0	0	0.083184	0	0
TCONS_00040398	ENSG00000204740	MALRD1	0	0	0	0	0	0	0.044001	0	0
TCONS_00040401	ENSG00000204740	MALRD1	0	0	0	0	0	0.003428	0.087639	0.003428	0.008856
TCONS_00064080	XLOC_026612	XLOC_026612	0	0	0	0	0	0	0.094477	0	0
TCONS_00081508	ENSG00000177627	C12orf54	0	0	0	0	0	0	0.033394	0	0.00645
TCONS_00095286	XLOC_038139	XLOC_038139	0	0	0	0	0	0.039722	0.119853	0.039722	0
TCONS_00088292	XLOC_035622	XLOC_035622	0	0	0.028789	0	0	0	0.245022	0	0.033278
TCONS_00104256	XLOC_042131	XLOC_042131	0	0	0.025274	0	0	0	0.080104	0	0.016037
TCONS_00100245	XLOC_040168	XLOC_040168	0	0	0	0	0	0	0.086779	0	0
TCONS_00101246	XLOC_040663	XLOC_040663	0	0	0	0	0	0	0.081225	0	0
TCONS_00106460	XLOC_043173	XLOC_043173	0	0.023504	0	0	0	0.018683	0.282344	0.018683	0.072534
TCONS_00116501	XLOC_047290	XLOC_047290	0.013143	0	0	0	0	0.011664	0.078704	0.011664	0
TCONS_00112796	XLOC_046039	XLOC_046039	0	0	0	0	0	0	0.081144	0	0
TCONS_00129347	XLOC_052507	XLOC_052507	0	0	0	0	0	0	0.114294	0	0
TCONS_00124867	XLOC_050838	XLOC_050838	0	0.051553	0	0	0	0.008977	0.125417	0.008977	0
TCONS_00134183	XLOC_054141	XLOC_054141	0	0	0	0	0	0	0.167044	0	0
TCONS_00136994	XLOC_055012	XLOC_055012	0	0	0	0	0	0	0.130622	0	0
TCONS_00145866	XLOC_057512	XLOC_057512	0	0	0	0	0	0	0.083871	0	0
TCONS_00148434	XLOC_058313	XLOC_058313	0	0.026985	0	0	0	0	0.120967	0	0
TCONS_00148706	XLOC_058458	XLOC_058458	0	0	0	0	0	0	0.088277	0	0
TCONS_00149639	XLOC_058851	XLOC_058851	0	0	0	0	0	0	0.191632	0	0
TCONS_00143547	XLOC_057007	XLOC_057007	0	0	0	0	0	0	0.102141	0	0
TCONS_00164903	XLOC_063542	XLOC_063542	0	0	0	0	0	0	0.080794	0	0
TCONS_00155210	XLOC_060537	XLOC_060537	0	0	0	0	0	0	0.081852	0	0
TCONS_00155360	XLOC_060576	XLOC_060576	0	0	0	0	0	0	0.089258	0	0
TCONS_00155679	XLOC_060685	XLOC_060685	0	0	0	0	0	0	0.122779	0	0
TCONS_00170296	XLOC_065314	XLOC_065314	0	0	0	0	0	0	0.091883	0	0
TCONS_00160968	ENSG00000170412	GPRC5C	0	0	0	0	0	0	0.003009	0	0
TCONS_00172825	XLOC_066035	XLOC_066035	0	0	0	0	0	0	0.089685	0	0
TCONS_00172832	XLOC_066042	XLOC_066042	0	0	0	0	0	0	0.088991	0	0
TCONS_00178273	XLOC_068216	XLOC_068216	0	0	0	0.016868	0	0	0.104599	0	0
TCONS_00174542	XLOC_066562	XLOC_066562	0	0	0	0	0	0	0.067143	0	0
TCONS_00178786	XLOC_068461	XLOC_068461	0	0	0	0	0	0	0.034364	0	0
TCONS_00175704	XLOC_067096	XLOC_067096	0	0	0	0	0	0	0.057528	0	0
TCONS_00176426	XLOC_067412	XLOC_067412	0	0	0	0	0	0	0.133887	0	0
TCONS_00180638	XLOC_069355	XLOC_069355	0	0	0	0	0	0	0.145983	0	0.056113
TCONS_00177535	XLOC_067940	XLOC_067940	0	0	0.012232	0	0	0	0.133506	0	0
TCONS_00219306	XLOC_082757	XLOC_082757	0	0	0	0.01705	0	0.005076	0.101088	0.005076	0
TCONS_00220235	XLOC_083103	XLOC_083103	0	0	0	0	0	0	0.081497	0	0
TCONS_00204881	XLOC_076741	XLOC_076741	0	0.028021	0	0	0	0	0.09738	0	0
TCONS_00221346	XLOC_083570	XLOC_083570	0	0	0	0	0	0	0.082574	0	0
TCONS_00206445	XLOC_077331	XLOC_077331	0	0	0	0	0	0	0.120671	0	0
TCONS_00223375	XLOC_084452	XLOC_084452	0	0	0	0	0	0	0.023079	0	0
TCONS_00211580	XLOC_079559	XLOC_079559	0	0	0	0	0	0	0.088976	0	0
TCONS_00228014	XLOC_086444	XLOC_086444	0	0	0	0	0	0	0.106906	0	0
TCONS_00212950	XLOC_080169	XLOC_080169	0	0	0	0	0	0	0.09025	0	0
TCONS_00215322	XLOC_081230	XLOC_081230	0	0	0	0	0	0	0.082939	0	0.036435
TCONS_00231774	XLOC_088102	XLOC_088102	0	0	0	0	0	0	0.02239	0	0
TCONS_00235242	XLOC_089606	XLOC_089606	0	0	0	0	0	0	0.128974	0	0
TCONS_00235401	XLOC_089693	XLOC_089693	0	0	0	0	0	0	0.114761	0	0.045877
TCONS_00241056	XLOC_092081	XLOC_092081	0	0	0	0	0	0.01014	0.093268	0.01014	0
TCONS_00236320	ENSG00000125999	BPIFB1	0	0	0	0	0	0	0.076821	0	0
TCONS_00242014	XLOC_092441	XLOC_092441	0	0	0	0	0	0	0.138504	0	0
TCONS_00242350	XLOC_092628	XLOC_092628	0	0.029664	0	0	0	0	0.151775	0	0.02998
TCONS_00242906	XLOC_092867	XLOC_092867	0	0	0	0	0	0	0.110935	0	0
TCONS_00238461	XLOC_090965	XLOC_090965	0	0	0	0	0	0.021827	0.088695	0.021827	0
TCONS_00243649	XLOC_093286	XLOC_093286	0	0	0	0	0	0	0.086779	0	0
TCONS_00247543	XLOC_094941	XLOC_094941	0	0	0	0	0	0	0.105136	0	0
TCONS_00256408	XLOC_098444	XLOC_098444	0	0.066178	0	0	0	0	0.109497	0	0
TCONS_00272012	ENSG00000183960	KCNH8	0	0	0	0	0	0	0.091642	0	0
TCONS_00261605	XLOC_100194	XLOC_100194	0	0	0	0	0	0	0.11026	0	0
TCONS_00265834	XLOC_101910	XLOC_101910	0.036563	0	0	0	0	0	0.065235	0	0
TCONS_00266680	XLOC_102265	XLOC_102265	0.030588	0.017182	0	0	0	0.009727	0.088751	0.009727	0
TCONS_00279423	XLOC_107416	XLOC_107416	0	0	0	0	0	0.016655	0.140412	0.016655	0.045302
TCONS_00280338	XLOC_107849	XLOC_107849	0	0	0	0	0	0.01107	0.083836	0.01107	0
TCONS_00293386	XLOC_113736	XLOC_113736	0	0	0	0	0	0	0.117642	0	0
TCONS_00294371	XLOC_114282	XLOC_114282	0	0	0	0	0	0	0.018126	0	0
TCONS_00294375	XLOC_114286	XLOC_114286	0	0	0	0	0	0	0.080197	0	0
TCONS_00286459	XLOC_110400	XLOC_110400	0	0	0	0	0	0	0.089904	0	0
TCONS_00286613	XLOC_110520	XLOC_110520	0	0	0	0	0	0	0.091584	0	0
TCONS_00298241	XLOC_115932	XLOC_115932	0	0	0	0	0	0	0.112917	0	0
TCONS_00289466	XLOC_111770	XLOC_111770	0	0	0	0	0	0	0.090698	0	0
TCONS_00290068	ENSG00000234828	IQCM	0	0	0	0	0	0	0.121383	0	0
TCONS_00299543	XLOC_116562	XLOC_116562	0	0	0	0	0	0	0.087708	0	0
TCONS_00299946	XLOC_116766	XLOC_116766	0	0	0	0	0	0	0.08251	0	0
TCONS_00291264	XLOC_112677	XLOC_112677	0	0	0	0	0	0	0.09435	0	0
TCONS_00300543	XLOC_117068	XLOC_117068	0.011045	0	0	0	0	0	0.019921	0	0
TCONS_00312192	XLOC_122354	XLOC_122354	0	0	0	0	0	0	0.12072	0	0.01505
TCONS_00301586	XLOC_117604	XLOC_117604	0	0	0	0	0	0.029988	0.101047	0.029988	0.01942
TCONS_00313844	XLOC_123260	XLOC_123260	0	0	0	0	0	0	0.078495	0	0
TCONS_00314177	XLOC_123453	XLOC_123453	0	0	0	0	0	0	0.090858	0	0
TCONS_00305089	XLOC_119312	XLOC_119312	0	0	0	0	0	0	0.148371	0	0
TCONS_00305869	XLOC_119707	XLOC_119707	0	0.064575	0	0	0	0	0.104573	0	0
TCONS_00305870	XLOC_119707	XLOC_119707	0	0	0	0	0	0	0.010869	0	0
TCONS_00317074	XLOC_124929	XLOC_124929	0	0	0	0	0	0	0.13132	0	0
TCONS_00310299	XLOC_121579	XLOC_121579	0	0	0	0	0	0	0.084152	0	0
TCONS_00338141	XLOC_134858	XLOC_134858	0	0	0	0	0	0	0.086379	0	0.033901
TCONS_00327879	XLOC_129768	XLOC_129768	0.024323	0	0	0	0	0	0.141858	0	0
TCONS_00327918	XLOC_129789	XLOC_129789	0	0	0	0	0	0	0.098561	0	0
TCONS_00328230	XLOC_129942	XLOC_129942	0	0	0	0	0	0.024863	0.091385	0.024863	0.023024
TCONS_00329289	XLOC_130623	XLOC_130623	0	0	0	0	0	0	0.113275	0	0
TCONS_00340418	XLOC_136135	XLOC_136135	0	0.028552	0.014575	0	0	0.011699	0.085739	0.011699	0
TCONS_00340556	XLOC_136187	XLOC_136187	0	0	0	0	0	0	0.023933	0	0
TCONS_00332320	XLOC_132240	XLOC_132240	0	0	0	0	0	0	0.116692	0	0
TCONS_00354043	XLOC_141832	XLOC_141832	0	0	0	0	0	0	0.082023	0	0
TCONS_00345058	XLOC_138177	XLOC_138177	0	0	0	0	0	0.020081	0.183767	0.020081	0
TCONS_00345295	XLOC_138291	XLOC_138291	0	0	0	0	0	0	0.090116	0	0
TCONS_00346016	ENSG00000136250	AOAH	0	0	0	0	0	0	0.084815	0	0
TCONS_00346030	XLOC_138561	XLOC_138561	0	0	0	0	0	0	0.085515	0	0.020216
TCONS_00361000	XLOC_144582	XLOC_144582	0	0	0	0.017338	0	0	0.118662	0	0
TCONS_00361024	XLOC_144603	XLOC_144603	0	0	0.014126	0	0	0.015747	0.152222	0.015747	0.04501
TCONS_00352799	ENSG00000213215	OR2F1	0	0	0	0	0	0	0.023848	0	0
TCONS_00365567	XLOC_146491	XLOC_146491	0	0	0	0	0	0	0.083308	0	0
TCONS_00366229	XLOC_146747	XLOC_146747	0	0	0	0	0	0	0.088433	0	0
TCONS_00366235	XLOC_146753	XLOC_146753	0	0	0	0	0	0	0.125703	0	0.019421
TCONS_00375578	XLOC_151195	XLOC_151195	0	0	0	0	0	0	0.118793	0	0
TCONS_00368148	XLOC_147732	XLOC_147732	0	0	0	0	0	0	0.186695	0	0
TCONS_00371028	XLOC_149187	XLOC_149187	0	0	0	0.062427	0	0	0.133316	0	0
TCONS_00380163	XLOC_153277	XLOC_153277	0	0	0	0	0	0	0.10299	0	0
TCONS_00380922	XLOC_153522	XLOC_153522	0	0	0	0	0	0	0.078101	0	0
TCONS_00385458	XLOC_155922	XLOC_155922	0	0	0	0	0	0	0.101056	0	0.006321
TCONS_00385688	XLOC_156070	XLOC_156070	0.01004	0	0	0	0	0	0.105701	0	0
TCONS_00386342	XLOC_156460	XLOC_156460	0	0	0	0	0	0	0.12386	0	0.023805
TCONS_00395330	XLOC_160611	XLOC_160611	0	0.032176	0	0.040975	0	0	0.161588	0	0
TCONS_00396683	ENSG00000107147	KCNT1	0	0	0	0	0	0	0.224398	0	0
TCONS_00397987	XLOC_161616	XLOC_161616	0	0	0	0	0	0	0.085512	0	0
TCONS_00404979	XLOC_165087	XLOC_165087	0	0	0	0	0	0	0.025271	0	0
TCONS_00405766	XLOC_165481	XLOC_165481	0	0	0	0	0	0	0.084917	0	0
TCONS_00406050	XLOC_165653	XLOC_165653	0	0	0	0	0	0	0.133887	0	0
TCONS_00399578	XLOC_162400	XLOC_162400	0	0	0.018	0	0	0	0.084433	0	0
TCONS_00408194	XLOC_166635	XLOC_166635	0	0	0	0	0	0.022347	0.188266	0.022347	0
TCONS_00409358	XLOC_167321	XLOC_167321	0	0	0	0	0	0	0.106099	0	0
TCONS_00402845	XLOC_164112	XLOC_164112	0	0	0	0	0	0	0.084815	0	0
TCONS_00402855	XLOC_164122	XLOC_164122	0	0	0	0	0	0	0.078101	0	0
TCONS_00000256	XLOC_000174	XLOC_000174	0	0	0	0	0	0	0.079425	0	0
TCONS_00000397	XLOC_000280	XLOC_000280	0	0	0.00726	0.02207	0	0	0.080794	0	0
TCONS_00000424	XLOC_000307	XLOC_000307	0	0	0	0	0	0	0.090464	0	0
TCONS_00001019	XLOC_000755	XLOC_000755	0	0	0	0	0	0	0.134809	0	0

## Sheet: lncRNA_UV_cluster 8
transcript_id	gene_id	gene_name	C_0	UV_3	UV_6	UV_9	UV_12	UV_24	UV_48	UV_24	UV_96
ENST00000588951	ENSG00000237491	AL669831.5	0	0	0	0	0	0	0	0	0
ENST00000432521	ENSG00000238164	TNFRSF14-AS1	0	0	0	0	0	0	0	0	0
ENST00000443034	ENSG00000227589	AL136528.1	0	0	0	0	0	0	0	0	0
ENST00000455744	ENSG00000226944	AL031847.1	0	0.004443	0	0	0	0	0	0	0
ENST00000445884	ENSG00000228150	AL357140.2	0	0	0.04781	0	0	0	0	0	0
ENST00000457706	ENSG00000233431	LINC02596	0	0	0	0	0	0	0	0	0
ENST00000454613	ENSG00000186056	MATN1-AS1	0	0	0	0	0	0	0	0	0
ENST00000443076	ENSG00000186056	MATN1-AS1	0	0	0	0	0	0.004931	0	0.004931	0.007952
ENST00000634587	ENSG00000223382	LINC01778	0.001995	0	0	0.005634	0	0.012556	0	0.012556	0
ENST00000609033	ENSG00000235790	AC114488.2	0	0	0	0	0	0	0	0	0
ENST00000641632	ENSG00000284719	AL033527.5	0	0.008498	0	0	0	0	0	0	0
ENST00000609027	ENSG00000230615	AL139220.2	0	0	0	0	0	0	0	0	0
ENST00000420071	ENSG00000230114	AL590432.1	0	0	0	0	0	0	0	0	0
ENST00000641838	ENSG00000260971	AC119674.1	0	0	0	0	0	0	0	0	0
ENST00000635072	ENSG00000237352	LINC01358	0	0	0	0	0	0	0	0	0.087749
ENST00000435311	ENSG00000231987	LINC01787	0	0	0	0	0	0.001251	0.011012	0.001251	0
ENST00000449473	ENSG00000233184	AC093157.1	0	0	0	0	0	0	0	0	0
ENST00000421157	ENSG00000238198	AL357055.3	0.000654	0	0	0	0	0	0	0	0
ENST00000430107	ENSG00000233154	LINC01762	0	0	0	0	0	0	0	0	0.014013
ENST00000601726	ENSG00000234222	LIX1L-AS1	0	0.002418	0	0	0	0	0	0	0
ENST00000630257	ENSG00000234222	LIX1L-AS1	0	0	0	0	0	0	0	0	0
ENST00000601684	ENSG00000269621	AL589765.7	0	0	0	0	0	0	0	0	0
ENST00000610146	ENSG00000273002	AL355388.2	0	0	0	0	0	0	0	0	0
ENST00000435580	ENSG00000225279	AL121987.1	0	0	0	0	0	0	0	0	0
ENST00000648032	ENSG00000285636	AL450163.1	0	0	0	0	0	0	0	0	0
ENST00000430592	ENSG00000227373	AL121983.2	0	0	0	0	0	0	0	0	0
ENST00000414890	ENSG00000223525	RABGAP1L-IT1	0.011006	0	0	0	0	0	0	0	0
ENST00000447832	ENSG00000226235	LEMD1-AS1	0	0	0	0	0	0	0	0	0
ENST00000619429	ENSG00000275213	RF00017	0	0	0	0	0	0	0	0	0
ENST00000442684	ENSG00000243636	AL445493.2	0	0	0	0	0	0	0	0	0
ENST00000639326	ENSG00000284376	AC092017.4	0	0	0	0	0	0	0	0	0
ENST00000626109	ENSG00000281664	LINC00538	0	0	0	0	0	0	0	0	0
ENST00000443422	ENSG00000228382	ITPKB-IT1	0	0	0	0	0	0	0	0	0
ENST00000456078	ENSG00000231272	AL122008.1	0	0	0	0	0	0	0	0	0
ENST00000449012	ENSG00000228044	AL160408.1	0	0	0	0	0	0	0	0	0.002282
ENST00000439849	ENSG00000236031	AL591721.1	0	0	0	0	0	0	0	0	0
ENST00000430998	ENSG00000231298	MANCR	0	0	0	0	0	0	0	0	0
ENST00000542093	ENSG00000205488	CALML3-AS1	0	0	0	0	0	0	0	0	0
ENST00000649029	ENSG00000238266	LINC00707	0	0	0	0	0.000857	0.000381	0	0.000381	0.003769
ENST00000608026	ENSG00000273153	AC067747.1	0	0	0	0	0	0	0.003718	0	0
ENST00000428915	ENSG00000203496	AL133216.1	0	0	0	0	0	0	0	0	0
ENST00000649397	ENSG00000236769	LINC02659	0	0	0	0	0	0	0	0	0
ENST00000649379	ENSG00000285786	AC074325.1	0	0	0	0	0	0	0	0	0
ENST00000600081	ENSG00000229227	AL356056.1	0.001699	0	0	0	0	0.00064	0	0.00064	0
ENST00000620859	ENSG00000228065	LINC01515	0	0	0	0	0	0	0	0	0
ENST00000595269	ENSG00000228065	LINC01515	0	0	0	0	0	0	0	0	0
ENST00000595383	ENSG00000268659	AL589863.1	0	0	0	0	0	0	0	0	0
ENST00000617241	ENSG00000236467	KCNMA1-AS1	0	0	0	0	0	0	0	0	0
ENST00000456353	ENSG00000224596	ZMIZ1-AS1	0.001425	0	0	0	0	0	0.001691	0	0
ENST00000434792	ENSG00000228261	ITPRIP-AS1	0	0	0	0	0	0	0	0	0
ENST00000622852	ENSG00000229981	LINC01435	0	0	0	0	0	0	0.011861	0	0
ENST00000531076	ENSG00000255328	AC136475.5	0	0	0	0	0	0	0	0	0
ENST00000381361	ENSG00000099869	IGF2-AS	0	0	0	0	0	0	0	0	0
ENST00000621902	ENSG00000276015	RF01950	0	0	0	0	0	0	0	0	0
ENST00000526922	ENSG00000254592	AC123788.1	0.016051	0	0	0	0	0	0	0	0
ENST00000504206	ENSG00000251364	AC107884.1	0	0	0	0	0	0	0	0	0.000759
ENST00000533659	ENSG00000255476	AC011092.2	0.003048	0.008792	0	0	0	0.00135	0	0.00135	0
ENST00000526388	ENSG00000251381	LINC00958	0	5.8e-05	0	0	0	0	0	0	0
ENST00000534068	ENSG00000255193	AC100768.2	0	0	0	0	0	0	0	0	0
ENST00000533793	ENSG00000255314	AC024475.4	0	0	0	0	0	0	0	0	0
ENST00000648317	ENSG00000285658	AC127035.1	0	0	0	0	0	0	0	0	0
ENST00000544108	ENSG00000250659	AP001363.1	0	0	0	0	0	0	0	0	0
ENST00000534505	ENSG00000255557	AP001266.2	0	0	0	0	0	0	0	0	0
ENST00000565199	ENSG00000260808	AP003096.1	0	0.001805	0	0	0	0	0	0	0.004004
ENST00000542064	ENSG00000255774	AP000439.2	0	0	0	0	0.009826	0	0	0	0
ENST00000526154	ENSG00000254511	AP002802.1	0	0	0	0	0	0	0	0	0
ENST00000506309	ENSG00000250519	AP002784.1	0	0	0	0	0	0	0	0	0
ENST00000544019	ENSG00000255666	AP000943.2	0	0	0	0	0	0.000653	0	0.000653	0
ENST00000534891	ENSG00000245552	AP000787.1	0	0	0	0	0	0.009273	0	0.009273	0
ENST00000505153	ENSG00000250493	AP004147.1	0	0	0	0	0	0	0	0	0
ENST00000548204	ENSG00000257271	KIRREL3-AS1	0.006723	0	0	0	0	0	0	0	0.006066
ENST00000543290	ENSG00000250132	AC004803.1	0	0	0	0	0	0	7.2e-05	0	0
ENST00000539795	ENSG00000256101	AC092745.1	0	0	0	0	0	0	0	0	0
ENST00000540299	ENSG00000249790	AC092490.1	0	0	0	0	0	0	0	0	0
ENST00000620519	ENSG00000275764	AC092747.4	0.037602	0.057305	0.033552	0.041696	0.048301	0.036408	0.035308	0.036408	0.034866
ENST00000535870	ENSG00000245614	DDX11-AS1	0	0.002122	0	0	0	0	0	0	0
ENST00000618746	ENSG00000273765	AC024257.4	0	0	0	0	0	0	0	0	0
ENST00000547395	ENSG00000257913	DDN-AS1	0	0	0	0	0	0	0	0	0
ENST00000547538	ENSG00000257989	AC078864.1	0	0	0	0	0	0	0	0	0
ENST00000549388	ENSG00000257337	AC068888.1	0	0	0	0	0	0	0	0	0
ENST00000551732	ENSG00000257534	AC023794.5	0.002641	0	0	0	0	0.001148	0	0.001148	0
ENST00000553249	ENSG00000258045	RF00017	0.001078	0	0	0	0	0	0	0	0
ENST00000547590	ENSG00000257443	AC068305.2	0	0	0	0	0	0	0	0	0
ENST00000546214	ENSG00000255850	RXYLT1-AS1	0	0	0	0	0	0	0	0	0
ENST00000615716	ENSG00000277851	LINC02391	0	0	0	0	0	0.0086	0	0.0086	0
ENST00000550175	ENSG00000257766	AC025265.3	0	0	0	0	0	0	0	0	0
ENST00000551505	ENSG00000257545	AC079385.1	0	0	0	0	0	0	0	0	0
ENST00000550306	ENSG00000257221	AC007569.1	0	0	0	0	0	0.004859	0	0.004859	0
ENST00000617627	ENSG00000276308	AC078880.4	0	0	0	0	0	0	0	0	0
ENST00000546414	ENSG00000257683	LINC02463	0	0	0	0	0	0	0	0	0
ENST00000623511	ENSG00000279516	FAM230C	0	0	0	0	0	0	0	0	0
ENST00000651377	ENSG00000279516	FAM230C	0	0	0	0	0	0	0	0	0
ENST00000433788	ENSG00000238185	AL353680.1	0	0	0	0	0	0	0	0	0
ENST00000620454	ENSG00000233725	LINC00284	0	0	0	0	0	0	0	0	0
ENST00000613982	ENSG00000273523	AL139082.1	0	0	0	0	0	0	0	0	0
ENST00000426859	ENSG00000229373	LINC00452	0	0	0	0	0	0.003922	0.006821	0.003922	0
ENST00000558423	ENSG00000215256	DHRS4-AS1	0	0	0	0	0	0	0	0	0
ENST00000553827	ENSG00000258969	LINC02307	0	0	0	0	0	0	0	0	0
ENST00000553603	ENSG00000259007	AL358333.3	0	0	0	0	0	0	0	0	0
ENST00000436530	ENSG00000225680	AL163953.1	0	0	0	0	0	0	0	0	0
ENST00000557142	ENSG00000214900	LINC01588	0	0	0	0	0	0	0	0	0
ENST00000556417	ENSG00000258791	LINC00520	0	0	0	0	0	0	0	0	0
ENST00000534909	ENSG00000248550	OTX2-AS1	0	0	0	0	0	0	0	0	0
ENST00000473332	ENSG00000240837	RN7SL77P	0	0	0	0	0	0	0	0	0
ENST00000647653	ENSG00000285612	AC004974.1	0	0	0	0	0	0	0	0	0
ENST00000556368	ENSG00000259081	AF111169.3	0.018158	0	0	0	0	0	0	0	0
ENST00000555291	ENSG00000258419	AC022469.1	0	0	0	0	0	0	0	0	0
ENST00000646052	ENSG00000284959	AC007262.2	0	0	0	0.001839	0	0	0	0	0.003074
ENST00000557547	ENSG00000258902	AL049775.2	0	0	0	0	0	0	0.002733	0	0.006791
ENST00000557646	ENSG00000258987	AL132642.1	0	0	0	0	0	0	0	0	0
ENST00000556080	ENSG00000258620	AL135838.1	0	0	0	0	0	0	0	0	0
ENST00000563044	ENSG00000260978	AC126407.1	0	0	0	0	0	0	0	0	0
ENST00000546615	ENSG00000257647	AC124312.2	0	0	0	0	0	0	0	0	0
ENST00000619139	ENSG00000277467	RN7SL628P	0	0	0	0.007551	0	0	0	0	0
ENST00000460684	ENSG00000241818	AC123768.1	0	0	0	0.012744	0	0	0	0	0
ENST00000558209	ENSG00000259345	AC013652.1	0	0	0	0	0	0	0	0	0
ENST00000559730	ENSG00000259211	AC013356.2	0.0055	6.4e-05	0	0	0	5.1e-05	0	5.1e-05	0
ENST00000559356	ENSG00000179523	EIF3J-DT	0	0	0	0	0	0	0	0	0
ENST00000561404	ENSG00000259520	AC051619.5	0	0	0	0	0	0	0	0	0
ENST00000560034	ENSG00000259519	AC051619.4	0.004407	0	0	0	0	0	0	0	0
ENST00000559960	ENSG00000259354	AC025580.2	0	0	0	0	0	0	0	0	0
ENST00000501579	ENSG00000245534	RORA-AS1	0	0	0	0	0	0	0	0	0
ENST00000650404	ENSG00000285919	AC087639.2	0	0	0	0	0	0	0	0	0
ENST00000568984	ENSG00000260173	AC020779.2	0	0	0	0	0	0	0	0	0
ENST00000648513	ENSG00000260586	AC064799.2	0	0	0	0	0	0	0	0	0
ENST00000558633	ENSG00000245750	DRAIC	0	0	0	0	0	0	0	0	0
ENST00000559477	ENSG00000245750	DRAIC	0	0	0	0	0	0	0	0	0
ENST00000568087	ENSG00000261801	LOXL1-AS1	0.003974	0	0	0	0	0.005284	0	0.005284	0.001305
ENST00000611006	ENSG00000277749	AC023300.2	0	0	0	0	0	0	0	0	0
ENST00000648196	ENSG00000285560	AC103739.3	0.003934	0	0	0	0	0	0	0	0
ENST00000562232	ENSG00000261140	AC093525.4	0	0	0	0	0	0	0	0	0
ENST00000569678	ENSG00000261442	AC023830.1	0	0	0	0	0	0	0	0	0
ENST00000565498	ENSG00000260510	AC004381.1	0	0	0	0	0	0	0	0	0
ENST00000565214	ENSG00000260034	LCMT1-AS2	0.000695	0.000338	0	0.001263	0.001568	0	0	0	0
ENST00000568121	ENSG00000260854	LINC02184	0	0	0	0	0	0	0	0	0
ENST00000607580	ENSG00000272545	AC023813.4	0	0	0	0	0	0	0	0	0
ENST00000562536	ENSG00000261173	AC018845.3	0	0.014808	0.000325	0	6e-05	0	0.000466	0	0.0001
ENST00000602304	ENSG00000270120	AC007728.3	0	0	0	0	0	0	0	0	0
ENST00000567929	ENSG00000246379	AC007495.1	0	0	0	0	0	0	0	0	0
ENST00000563251	ENSG00000261633	AC018552.3	0	0	0	0	0	0	0	0	0
ENST00000569736	ENSG00000261742	LINC00922	0.006352	0	0	0	0	0	0	0	0
ENST00000501143	ENSG00000246777	AC044802.1	0	0	0	0	0	0	9.8e-05	0	0
ENST00000388909	ENSG00000237718	AC009095.1	0.002129	0	0	0	0	0	0	0	0
ENST00000561611	ENSG00000261008	LINC01572	0	0	0	0	0	0	0	0	0
ENST00000563328	ENSG00000259768	AC004943.2	0.003365	0	0	0	0	0	0.011655	0	0.010379
ENST00000568137	ENSG00000261404	AC138627.1	0	0	0	0	0	0	0	0	0
ENST00000594203	ENSG00000168367	LINC00917	0	0	0	0	0	0	0	0	0
ENST00000594398	ENSG00000268388	FENDRR	0	0	0	0	0	0.004024	0	0.004024	0
ENST00000602706	ENSG00000270184	AC018695.4	0.005718	0	0	0	0	0.001021	0	0.001021	0
ENST00000610816	ENSG00000276088	RN7SL620P	0	0	0	0	0	0	0	0	0
ENST00000578977	ENSG00000263609	LINC02002	0	0	0	0	0	0	0	0	0
ENST00000577814	ENSG00000264044	AC005726.2	1.3e-05	0	0	0	0.003891	0.000395	0	0.000395	0
ENST00000584258	ENSG00000263477	AC104982.1	0	0	0	0	0	0	0	0	0
ENST00000582841	ENSG00000265443	AC127024.3	0	0	0	0	0	0	0	0	0
ENST00000583224	ENSG00000263571	AC004147.2	0	0	0	0	0	0	0	0	0
ENST00000585899	ENSG00000267638	AC023855.1	0	0	0	0	0	0	0	0	0
ENST00000492522	ENSG00000244649	LINC02086	0	0	0	0	0	0	0	0	0
ENST00000478824	ENSG00000244649	LINC02086	0	0	0	0	0	0	0	0	0
ENST00000572855	ENSG00000261959	AC015909.3	0	0	0	0	0	0	0	0	0
ENST00000451776	ENSG00000236472	AC002401.1	0	0	0	0	0	0	0.00459	0	0.001437
ENST00000583841	ENSG00000265148	TSPOAP1-AS1	0	0	0	0	0	0	0	0	0
ENST00000614751	ENSG00000273982	AC005746.3	0	0.023743	0	0	0	0	0	0	0
ENST00000636248	ENSG00000283538	AC005972.3	0	0	0	8e-06	0	7e-06	1.2e-05	7e-06	0
ENST00000583018	ENSG00000264272	AC100786.2	0	0	0	0	0	0	0	0	0
ENST00000589963	ENSG00000267546	AC015802.4	0	0	0	0	0	0	0	0	0
ENST00000592622	ENSG00000267546	AC015802.4	0	0	0	0	0	0	0	0	0
ENST00000588104	ENSG00000267078	AC015802.1	0	0	0	0	0	0	0.002134	0	0
ENST00000430912	ENSG00000229848	AC139149.1	4e-06	0	0	0	0	2e-06	0	2e-06	6e-06
ENST00000592203	ENSG00000267643	AP005264.4	0	0	0	0	0	0	0	0	0
ENST00000563722	ENSG00000260302	AP005482.1	0	0	0	0	0	0	0	0	0
ENST00000649259	ENSG00000285550	AC110014.1	0	0	0	0	0	0	0	0	0
ENST00000592286	ENSG00000267097	SLC14A2-AS1	0	0	0	0	0	0	0	0	0
ENST00000578152	ENSG00000227115	LINC01630	0	0	0	0	0	0	0	0	0
ENST00000578035	ENSG00000266743	AC103808.6	0	0	0	0	0	0	0	0	0
ENST00000591742	ENSG00000267628	AC104423.1	0	0	0	0	0	0	0	0	0
ENST00000585596	ENSG00000248015	AC005329.1	0	0	0	0	0	0	0	0	0
ENST00000586694	ENSG00000267141	AC012615.4	0	0	0	0	0	0	0	0	0
ENST00000314315	ENSG00000180846	CSNK1G2-AS1	0	0	0	0.003565	0	0	0	0	0
ENST00000597256	ENSG00000267986	AC130469.1	0	0	0	0	0	0	0	0	0
ENST00000598703	ENSG00000268618	AC092316.1	0	0	0	0	0	0	0	0	0
ENST00000414548	ENSG00000230310	AC010422.1	0	0	0	0	0	0	0	0	0
ENST00000645764	ENSG00000214049	UCA1	0	0	0	0	0	0	0	0	0
ENST00000597045	ENSG00000269066	AC020908.3	0	0	0	0	0	0	0	0	0
ENST00000594934	ENSG00000268362	AC092279.1	0	0	0	0	0	0	0	0	0
ENST00000605640	ENSG00000271032	AC020907.4	0	0	0	0	0	0	0	0	0
ENST00000593830	ENSG00000269050	AC011455.1	0	0	0	0	0	0	0	0	0
ENST00000651789	ENSG00000267107	PCAT19	0	0	0	0	0	0	0	0	0
ENST00000650804	ENSG00000267107	PCAT19	0	0	0	0	0	0	0	0	0
ENST00000607109	ENSG00000272396	AC005392.3	0	0	0	0	0	0	0	0	0
ENST00000591432	ENSG00000267044	AC005757.1	0	0	0	0	0	0	0	0	0
ENST00000599127	ENSG00000269729	AC006262.2	0	0.004218	0	0	0	0	0	0	0.002914
ENST00000650512	ENSG00000231482	AC105450.1	0	0	0	0	0	0	0	0	0
ENST00000449124	ENSG00000236204	LINC01376	0	0	0	0	0	0	0	0	0
ENST00000420016	ENSG00000233862	AC016907.2	0	0	0	0	0	0	0	0	0
ENST00000647879	ENSG00000285925	AC007391.2	0	0	0	0	0	0	0	0	0
ENST00000443038	ENSG00000231312	MAP4K3-DT	0	0	0	0	0	0	0	0	0
ENST00000597385	ENSG00000227028	SLC8A1-AS1	0	0	0	0	0	0	0	0	0
ENST00000490950	ENSG00000239332	LINC01119	0	0	0	0	0	0	0	0	0.001269
ENST00000613806	ENSG00000240401	AC012358.3	0	0.004928	0	0	0	0	0	0	0
ENST00000457668	ENSG00000228590	AC007381.1	0	0	0	0	0	0	0	0	0
ENST00000583069	ENSG00000263669	RN7SL470P	0	0	0	0	0	0	0.00386	0	0
ENST00000439192	ENSG00000237883	DGUOK-AS1	0.001308	0	0	0	3.6e-05	3.5e-05	0	3.5e-05	0.010604
ENST00000418204	ENSG00000204792	LINC01291	0	0	0	0	0	0	0.006702	0	0
ENST00000644976	ENSG00000222041	CYTOR	0.053175	0	0	0	0	0	0	0	0
ENST00000620023	ENSG00000230606	AC092683.1	0.014406	0	0	0	0	0	0	0	0
ENST00000594050	ENSG00000230606	AC092683.1	0	0	0	0	0	0	0	0	0
ENST00000600957	ENSG00000230606	AC092683.1	0.000998	0	0	0	0	0	0	0	0
ENST00000439150	ENSG00000230140	AC016738.2	0	0	0	0	0	0	0	0	0
ENST00000433012	ENSG00000230140	AC016738.2	0	0	0	0	0	0.001094	0	0.001094	0
ENST00000596418	ENSG00000235522	AC010978.1	0	0	0	0	0	0	0	0	0
ENST00000456683	ENSG00000227574	AC112229.2	0	0	0.003106	0	0	0	0	0	0
ENST00000556770	ENSG00000259094	AC013457.1	0	0	0	0	0	0	0	0	0
ENST00000614637	ENSG00000273950	RF00017	0	0	0	0	0	0	0	0	0
ENST00000599187	ENSG00000226674	TEX41	0	0	0	0	0	0	0	0	0
ENST00000594837	ENSG00000226674	TEX41	0	0	0	0	0	0	0.003075	0	0
ENST00000498656	ENSG00000242113	RN7SL124P	0	0	0	0	0	0	0	0	0
ENST00000629904	ENSG00000204380	PKP4-AS1	0	0	0	0	0	0	0	0	0
ENST00000442316	ENSG00000228222	AC073050.1	0	0.012665	0	0	0	0	0	0	0
ENST00000418106	ENSG00000235934	AC007405.2	0	0	0	0	0	0	0	0	0
ENST00000422703	ENSG00000238133	MAP3K20-AS1	0	0	0	0	0	0	0	0	0.008274
ENST00000414750	ENSG00000234663	LINC01934	0	0	0	0	0	0	0	0	0
ENST00000428980	ENSG00000233766	AC098617.1	0	0	0	0	0	0.004231	0	0.004231	0
ENST00000637390	ENSG00000225421	AC019330.1	0	0	0	0	0	0	0	0	0
ENST00000629993	ENSG00000226312	CFLAR-AS1	0	0	0	0	0	0	0	0	0
ENST00000598710	ENSG00000225216	AC007362.1	0	0	0	0	0	0	0	0	0
ENST00000627811	ENSG00000227769	AC072062.1	0	0	0	0	0	0	0	0	0
ENST00000422353	ENSG00000237525	AC012668.3	0	0	0	0	0	0	0	0	0
ENST00000431827	ENSG00000234638	AC053503.4	0	0	0	0	0	0	0	0	0
ENST00000432993	ENSG00000239498	AC019211.1	0	0	0	0	0	0	0	0	0
ENST00000438633	ENSG00000235337	AC093083.1	0	0	0	0	0	0	0	0	0
ENST00000580514	ENSG00000263941	RN7SL32P	0	0	0	0	0	0	0	0	0
ENST00000451070	ENSG00000237940	LINC01238	0	0	0	0	0	0	0	0	0
ENST00000458004	ENSG00000232448	AL354824.2	0	0	0	0	0.007515	0	0	0	0
ENST00000375670	ENSG00000204393	NOL4L-DT	0	0	0	0	0	0	0	0	0
ENST00000615037	ENSG00000273986	RF00017	0	0	0	0	0	0	0	0	0
ENST00000410528	ENSG00000222460	RN7SKP271	0	0	0	0	0	0	0	0	0
ENST00000466981	ENSG00000276031	RN7SL197P	0	0	0	0	0.01522	0	0	0	0
ENST00000487421	ENSG00000228812	LAMA5-AS1	0	0	0	0	0	0	0	0	0
ENST00000431361	ENSG00000229873	OGFR-AS1	0	0	0	0	0.000129	0	0	0	0
ENST00000455524	ENSG00000237371	AL355803.1	0	0	0	0	0	0	0	0	0
ENST00000623637	ENSG00000277991	FP236241.1	0	0	0	0	0	0	0	0	0
ENST00000436429	ENSG00000231201	AF127577.2	0	0	0	0	0	0	0	0	0
ENST00000454737	ENSG00000244676	AL109761.1	0	0	0	0	0	0	0	0	0
ENST00000452028	ENSG00000232855	AF165147.1	0	0	0	0	0	0	0	0	0.000542
ENST00000445464	ENSG00000236119	AP000688.3	0	0	0	0	0	0	0	0	0
ENST00000417335	ENSG00000235888	AF064858.1	0	0	0	0	0	0	0	0	0
ENST00000448247	ENSG00000215458	AATBC	0	0	0	0	0	0	0	0	0
ENST00000430181	ENSG00000235890	TSPEAR-AS1	0	0	0	0	0	0	0	0	0
ENST00000438574	ENSG00000225255	AP000527.1	0	0	0	0	0	0	0	0	0
ENST00000423736	ENSG00000236499	LINC00896	0.005137	0.005961	0.00518	0.005674	0.006669	0.005243	0.005277	0.005243	0.006216
ENST00000633827	ENSG00000282012	AP000357.2	0	0	0	0.01199	0	0	0	0	0
ENST00000539579	ENSG00000225465	RFPL1S	0	0	0	0	0	0	0	0	0
ENST00000382086	ENSG00000205853	RFPL3S	0	0.007895	0	0	0	0	0	0	0
ENST00000430883	ENSG00000243902	FP325335.1	0	0.001498	0	0	0	0	0	0	0
ENST00000435439	ENSG00000197182	MIRLET7BHG	0	0.007574	0	0	0	0	0	0	0
ENST00000650895	ENSG00000224271	AL117329.1	0	0	0	0	0	0.000171	0	0.000171	0
ENST00000652750	ENSG00000224271	AL117329.1	0	0	0	0	0	0	0	0	0
ENST00000449914	ENSG00000235978	AC018816.1	0	0	0	0	0	0	0	0	0.005687
ENST00000518331	ENSG00000254485	AC026191.1	0	0.003802	0	0	0	0	0	0	0
ENST00000607849	ENSG00000271716	AC022001.2	0	0	0	0	0	0	0	0	0
ENST00000593876	ENSG00000249786	EAF1-AS1	0	0	0	0	0.005798	0	0	0	0
ENST00000428872	ENSG00000232490	OSBPL10-AS1	0	0	0	0	0	0	0	0	0
ENST00000411010	ENSG00000222942	RN7SKP58	0	0	0	0	0	0	0	0	0
ENST00000600839	ENSG00000230970	HHATL-AS1	0	0	0	0	0	0	0	0	0
ENST00000432377	ENSG00000225611	LINC02158	0	0	0.012444	0	0.020568	0	0	0	0
ENST00000457331	ENSG00000236869	ZKSCAN7-AS1	0	0	0	0	0	0	0	0	0
ENST00000421735	ENSG00000232352	SEMA3B-AS1	0	0	0	0	0	0	0	0	0
ENST00000496829	ENSG00000243572	LINC02017	0	0	0	0	0	0	0	0	0
ENST00000470712	ENSG00000241163	LINC00877	0	0	0	0	0	0	0	0	0
ENST00000465742	ENSG00000244203	FOXP1-AS1	0	0	0	0	0	0	0	0	0
ENST00000472323	ENSG00000242767	ZBTB20-AS4	0	0	0	0	0	0	0	0	0
ENST00000609469	ENSG00000272758	AC083798.2	0	0	0	0.011564	0	0	0	0	0
ENST00000510827	ENSG00000250174	MYLK-AS2	0	0	0	0	0	0	0	0	0
ENST00000495917	ENSG00000244286	ITGB5-AS1	0	0	0	0	0	0.004837	0	0.004837	0
ENST00000356020	ENSG00000198685	LINC01565	0	0	0	0	0	0	0	0	0
ENST00000507770	ENSG00000250170	RASA2-IT1	0	0	0	0	0	0	0.012789	0	0
ENST00000478823	ENSG00000241570	PAQR9-AS1	0	0	0	0	0	0	0	0	0
ENST00000595248	ENSG00000241570	PAQR9-AS1	0	5e-06	0	0	0	0	0	0	0
ENST00000625677	ENSG00000241570	PAQR9-AS1	0	0	0	0	0	0	0	0	0
ENST00000476886	ENSG00000239265	CLRN1-AS1	0	0	0	0	0	0	0	0	0
ENST00000483289	ENSG00000239219	AC008040.1	0	0	0	0	0	0	0	0	0
ENST00000517211	ENSG00000253020	RN7SKP40	0	0	0	0	0	0	0	0	0
ENST00000625710	ENSG00000197099	AC068631.1	0	0	0	0	0	0	0	0	0
ENST00000449623	ENSG00000228804	AC072022.1	0	0	0	0	0	0	0	0	0
ENST00000597982	ENSG00000242086	MUC20-OT1	0	0	0	0	0	0	0	0	0
ENST00000628053	ENSG00000242086	MUC20-OT1	0	0	0	0	0	0	0	0	0
ENST00000599566	ENSG00000242086	MUC20-OT1	0	0	0	0	0	0.004352	0	0.004352	0
ENST00000594446	ENSG00000242086	MUC20-OT1	0	0	0	0	0	0	0	0	0
ENST00000631037	ENSG00000242086	MUC20-OT1	0	0	0	0	0	0	0	0	0
ENST00000625531	ENSG00000242086	MUC20-OT1	0	0	0	0	0	0	0	0	0
ENST00000597871	ENSG00000242086	MUC20-OT1	0	0	0	0	0	0	0	0	0
ENST00000455807	ENSG00000242086	MUC20-OT1	0	0	0	0	0	0.007167	0	0.007167	0
ENST00000631198	ENSG00000281016	AC092574.2	0	0	0	0	0	0	0	0	0
ENST00000602543	ENSG00000270090	AL590235.1	0	0	0	0	0	0	0	0	0
ENST00000627566	ENSG00000280650	KCNIP4-IT1	0	0	0	0	0	0	0	0	0
ENST00000501239	ENSG00000245928	AC112719.2	0	0	0	0.004248	0	0	0	0	0
ENST00000503539	ENSG00000251442	LINC01094	0	0	0	0	0	0	0	0	0
ENST00000651054	ENSG00000231782	LINC00575	0	0	0	0	0.008744	0	0	0	0
ENST00000652474	ENSG00000180769	WDFY3-AS2	0	0	0	0	0	0	0	0	0
ENST00000652652	ENSG00000180769	WDFY3-AS2	0	0	0	0	0	0	0	0	0
ENST00000499178	ENSG00000246090	AP002026.1	0	0	0	0	0	0	0	0	0
ENST00000507782	ENSG00000250344	AC105254.1	0	0	0	0	0	0	0	0	0
ENST00000503073	ENSG00000250938	AC108866.1	0	0	0	0	0	0	0	0	0
ENST00000509497	ENSG00000249806	AC139720.1	0	0	0	0	0	0	0	0	0
ENST00000652341	ENSG00000286133	AC093817.2	0	0	0	0	0	0	0	0	0
ENST00000513752	ENSG00000177822	TENM3-AS1	0	0	0	0	0	0	0	0	0
ENST00000511385	ENSG00000250658	AC097652.1	0	0	0	0	0	0	0	0	0
ENST00000399869	ENSG00000215246	AC116351.1	0	0	0	0	0	0	0	0	0
ENST00000605200	ENSG00000271119	AC026412.3	0	0	0	0	0	0	0	0	0
ENST00000508881	ENSG00000251365	LINC02236	0	0	0	0	0	0	0	0	0
ENST00000501071	ENSG00000245729	LINC02226	0	0	0	0	6e-06	0	0	0	0
ENST00000512976	ENSG00000249781	LINC02112	0.007832	0	0	0	0	0	0	0	0
ENST00000506519	ENSG00000250619	AC021088.1	0	0	0	0	0	0	0	0	0
ENST00000648234	ENSG00000249937	LINC02223	0	0.011753	0	0	0	0	0	0	0
ENST00000522350	ENSG00000253766	AC091946.1	0	0	0	0.008402	0	0	0	0	0
ENST00000510987	ENSG00000250122	AC122694.1	0	0	0	0	0	0	0.02496	0	0
ENST00000415589	ENSG00000237705	AC008937.2	0	0	0	0	0	0.004763	0	0.004763	0.014671
ENST00000506106	ENSG00000250961	AC025470.2	0.002255	0	0	0	0	0	0	0	0
ENST00000504876	ENSG00000152931	PART1	0	0	0	0	0	0	0.000484	0	0
ENST00000507514	ENSG00000225407	AC025188.1	0	0	0	0	0	0	0	0	0
ENST00000515419	ENSG00000250802	ZBED3-AS1	0	0	0	0	0	0	0	0	0
ENST00000507749	ENSG00000250802	ZBED3-AS1	0	0	0	0	0	0	0	0	0
ENST00000650004	ENSG00000248323	LUCAT1	0.004205	0	0	0	0	0.002172	0	0.002172	0
ENST00000649392	ENSG00000248323	LUCAT1	0	0	0	0	0	0	0	0	0
ENST00000650321	ENSG00000248323	LUCAT1	0	0	0	0	0.000907	0	0.004766	0	0
ENST00000357880	ENSG00000236882	LINC01554	0	0	0	0	0	0	0	0	0
ENST00000620167	ENSG00000236882	LINC01554	0	0	0	0	0	0	0	0	0
ENST00000505209	ENSG00000249610	AC010255.2	0	0	0	0	0	0	0	0	0
ENST00000457489	ENSG00000223442	TH2LCRR	0	0	0	0	0	0.020169	0	0.020169	0
ENST00000505663	ENSG00000249647	C5orf66-AS2	0.003866	0	0	0	0	0	0	0	0
ENST00000510110	ENSG00000249593	AC011405.1	0	0	0.003089	0	0	0	0	0	0
ENST00000524034	ENSG00000254226	LINC01933	0	0	0	0.003409	0	0	0	0	0
ENST00000518182	ENSG00000253921	AC091982.1	0	0	0	0	0	0	0	0	0
ENST00000519727	ENSG00000245275	SAP30L-AS1	0	0	0	0	0	0	0	0	0
ENST00000501818	ENSG00000247699	AC008609.1	0	0	0	0	0	0	0	0	0
ENST00000502514	ENSG00000249684	AC106795.2	0	0.006444	0	0	0	0	0	0	0
ENST00000410516	ENSG00000222448	RN7SKP150	0	0	0.018328	0	0	0	0	0	0
ENST00000607644	ENSG00000271727	AL357054.2	0	0	0	0	0	0	0	0	0
ENST00000379928	ENSG00000238221	AL139095.4	0	0	0	0	0	0	0	0	0
ENST00000487130	ENSG00000183674	LINC00518	0	0	0	0	0	0.012584	0	0.012584	0
ENST00000649568	ENSG00000285763	AL358777.1	0	0	0	0	0	0	0	0	0
ENST00000455973	ENSG00000230631	AL353152.1	0	0	0	0	0	0	0	0	0
ENST00000635227	ENSG00000226673	LINC01108	0	0	0	0	0	0	0	0	0
ENST00000456440	ENSG00000237346	AL080313.2	0	0	0	0	0	0	0	0	0
ENST00000651277	ENSG00000272168	CASC15	0	0	0	0	0	0	0	0	0
ENST00000444265	ENSG00000272168	CASC15	0	0	0	0	0	0.002751	0.000881	0.002751	0.000857
ENST00000566912	ENSG00000260455	NBAT1	0	0	0	0	0	0	0	0	0
ENST00000607607	ENSG00000224843	LINC00240	0	0	0	0	0	0	0	0	0
ENST00000638546	ENSG00000206344	HCG27	0	0	0	0	0	0	0	0	0.022168
ENST00000424675	ENSG00000206344	HCG27	0	0	0.000782	0	0	0	0.005547	0	0
ENST00000442150	ENSG00000224328	MDC1-AS1	0	0	0	0	0	0	0	0	0
ENST00000415626	ENSG00000229776	C4B-AS1	0	0	0	0	0	0	0	0	0
ENST00000458633	ENSG00000233627	C4A-AS1	0	0	0	0	0	0	0	0	0
ENST00000437249	ENSG00000231769	AL035701.1	0	0	0	0	0	0	0	0	0
ENST00000415787	ENSG00000236466	AL359633.2	5.3e-05	0	0	0	0	0	0	0	0
ENST00000421318	ENSG00000224583	AL356277.2	0	0	0	0	0	0	0.006871	0	0
ENST00000441184	ENSG00000225174	OSTM1-AS1	0	0	0	0	0	0.002225	0	0.002225	0
ENST00000427157	ENSG00000230943	LINC02541	0	0	0	0	0	0	0	0	0
ENST00000452675	ENSG00000230943	LINC02541	0	0.002485	0	0	0	0	0	0	0
ENST00000519104	ENSG00000228624	HDAC2-AS2	0	0	0	0	0	0	0	0	0
ENST00000521888	ENSG00000228624	HDAC2-AS2	0	0	0	0	0	0	0.000446	0	0
ENST00000442449	ENSG00000233351	AL356124.2	0	0	0	0	0	0	0	0	0
ENST00000576956	ENSG00000237596	AL138828.1	0	0	0	0	0	0	0	0	0
ENST00000587426	ENSG00000235652	AL356599.1	0	0	0.00236	0	0	0	0	0	0
ENST00000606686	ENSG00000272397	AL138916.2	0	0	0	0	0	0	0	0	0
ENST00000444188	ENSG00000226445	BX322234.1	0	0	0	0	0	0.060908	0	0.060908	0
ENST00000416100	ENSG00000231927	AC093734.1	0	0	0	0	0	0	0	0	0
ENST00000412014	ENSG00000226323	AC006150.1	0	0	0.001874	0	0	0	0	0	0.011871
ENST00000424101	ENSG00000237773	AC073332.1	0.000859	0	0	0	0	0	0	0	0
ENST00000454003	ENSG00000236039	AC019117.1	0	0	0	0	0	0	0	0	0
ENST00000430537	ENSG00000227017	AC007036.1	0	0	0	0	0	0	0	0	0
ENST00000439751	ENSG00000227172	AC011290.1	0	0	0	0.004001	0	0	0	0	0
ENST00000616609	ENSG00000277675	AC211486.5	0	0	0	0	0	0	0	0	0
ENST00000447058	ENSG00000228113	AC003991.1	0	0	0	0	0	0	0	0	0
ENST00000591803	ENSG00000267052	AC005050.1	0	0	0	0	0.019836	0	0	0	0.010523
ENST00000460471	ENSG00000225535	LINC01393	0	0	0	0	0	0	0	0	0
ENST00000609370	ENSG00000273219	AC091736.1	0	0.002753	0	0.000939	0	0.019455	0	0.019455	0
ENST00000617093	ENSG00000275427	AF067845.2	0	0	0	0	0	0	0	0	0
ENST00000605539	ENSG00000270988	AC019257.2	0	0	0	0	0	0	0	0	0
ENST00000527490	ENSG00000249898	MCPH1-AS1	0	0	0.016159	0	0	0	0	0	0
ENST00000522129	ENSG00000254237	AC021242.2	0	0	0	0	0	0	0	0	0
ENST00000531395	ENSG00000255046	AC069185.1	0	0	0	0	0	0	0	0	0
ENST00000533405	ENSG00000255046	AC069185.1	0	0	0	0	0	0	0	0	0
ENST00000522589	ENSG00000254370	AC025871.2	0.001182	0	0	0	0.000602	0	0	0	0
ENST00000518994	ENSG00000253408	AC083973.1	0	0	0	0	0	0	0	0	0
ENST00000522575	ENSG00000253608	AC022915.2	0.003322	0	0	0	0	0	0	0	0
ENST00000518620	ENSG00000253892	AC022915.3	0	0	0	0	0	0	0	0	0
ENST00000523786	ENSG00000246430	LINC00968	0	0	0	0	0	0	0	0	0
ENST00000522498	ENSG00000253115	AC087672.1	0	0	0	0	0	0	0	0	0
ENST00000521762	ENSG00000254349	MIR2052HG	0	0	0	6.2e-05	0	0	0	0	0
ENST00000518732	ENSG00000254300	LINC01111	0	0	0.020451	0	0	0.025407	0	0.025407	0.01911
ENST00000607172	ENSG00000272138	LINC01607	0	0	0	0	0	0	0	0	0
ENST00000607754	ENSG00000272138	LINC01607	0	0	0	0	0	0	0	0	0
ENST00000522776	ENSG00000253503	AC060765.1	0	0	0	0	0	0.008492	0	0.008492	0
ENST00000517655	ENSG00000253773	C8orf37-AS1	0	0.003601	0	0	0	0	0	0	0
ENST00000523784	ENSG00000254364	AP000424.2	0	0	0	0	0	0	0	0	0
ENST00000517512	ENSG00000253320	AZIN1-AS1	0	0	0	0	0	0	0	0	0
ENST00000517739	ENSG00000253619	AC068413.1	0	0	0	0	0	0	0	0	0
ENST00000521482	ENSG00000253372	AC016405.1	0.003727	0	0	0	0	0.02031	0	0.02031	0
ENST00000591577	ENSG00000227155	AL161725.1	0	0	0	0	0	0	0	0	0
ENST00000517151	ENSG00000252960	RN7SKP258	0	0	0	0	0	0	0	0	0
ENST00000629369	ENSG00000280683	LINC01242	0	0	0	0	0	0	0	0	0
ENST00000421848	ENSG00000223379	AL391987.3	0	0	0	0	0	0	0	0	0
ENST00000428709	ENSG00000233651	AL590399.5	0.000592	0.000419	0	0	0	0	0	0	0
ENST00000629161	ENSG00000233178	AL161457.2	0	0	0	0	0	0	0	0	0.003297
ENST00000377178	ENSG00000204706	MAMDC2-AS1	0.005204	0	0	0	0	0	0	0	0
ENST00000594708	ENSG00000268364	SMC5-AS1	0	0	0	0	0	0	0	0	0
ENST00000649093	ENSG00000285807	AL353768.2	0	0	0	0	0	0	0	0	0
ENST00000600140	ENSG00000268926	AL354861.3	0	0	0	0	0	0	0	0	0
ENST00000561961	ENSG00000261094	AC007066.2	0	0	0	0	0	0	0	0	0
ENST00000444125	ENSG00000233901	LINC01503	0	0	0	0	0	0	0	0	0
ENST00000423122	ENSG00000233901	LINC01503	0	0	0	0	0	0	0	0	0
ENST00000592466	ENSG00000236986	AL157938.2	0	0	0	0	0	0	0.000541	0	0
ENST00000589540	ENSG00000236986	AL157938.2	0	0.0002	0	0	3.3e-05	1.3e-05	0	1.3e-05	2.6e-05
ENST00000431486	ENSG00000231216	AC004674.1	0	0	0	0	0	0	0	0	0
ENST00000464966	ENSG00000265260	RN7SL74P	0	0	0	0	0	0	0	0	0
ENST00000622372	ENSG00000277215	SPANXA2-OT1	0	0	0	0	0	0	0	0	0
ENST00000437309	ENSG00000231447	AC244102.1	0	0	0	0	0	0	0	0	0
ENST00000444722	ENSG00000224216	AC234781.1	0	0	0	0	0	0	0	0	0
ENST00000412436	ENSG00000224216	AC234781.1	0	0	0	0	0	0	0	0	0
ENST00000427319	ENSG00000236335	AL161638.2	0	0	0	0	0	0	0	0	0
ENST00000456878	ENSG00000238242	AC097066.1	0	0	0	0	0	0	0	0	0.024549
ENST00000647626	ENSG00000285782	AC116099.1	0	0	0	0	0	0	0	0	0
ENST00000413356	ENSG00000231175	LINC01720	0	0	0	0	0	0	0	0	0
ENST00000412772	ENSG00000231507	LINC01353	0	0	0	0	0	0	0	0	0
ENST00000433008	ENSG00000231507	LINC01353	0	0	0	0	0	0	0	0	0
ENST00000444037	ENSG00000240219	AL512306.2	0	0	0	0	0	0	0.004224	0	0
ENST00000632868	ENSG00000282265	AL450990.1	0	0	0	0	0	0	0	0	0
ENST00000323223	ENSG00000177800	TMEM78	0	0	0	0	0	0	0	0	0
ENST00000427341	ENSG00000228951	AL365356.3	0	0	0	0	0	0	0	0	0
ENST00000435635	ENSG00000231964	AL731567.1	0	0	0	0	0	0	0	0	0
ENST00000437677	ENSG00000236208	C10orf71-AS1	0	0	0	0	0	0	0	0	0
ENST00000552096	ENSG00000257582	LINC01475	0	0	0	0	0	0	0	0	0
ENST00000649412	ENSG00000237761	AL161646.1	0	0.007993	0	0	0	0	0	0	0
ENST00000448347	ENSG00000230131	LINC02641	0	0	0	0	0	0	0	0	0
ENST00000448671	ENSG00000230131	LINC02641	0	0	0	0	0	0	0	0	0
ENST00000553459	ENSG00000166917	MIR202HG	0	0	0	0	0	0	0	0	0
ENST00000527819	ENSG00000254532	AC124657.1	0	0	0	0	0	0	0	0	0
ENST00000642898	ENSG00000285094	LINC01488	0	0	0	0	0	0	0	0	0
ENST00000635432	ENSG00000282916	AP003171.3	0	0	0	0	0	0	0	0	0
ENST00000511947	ENSG00000250390	AP001790.1	0	0	0	0	0	0	0	0	0
ENST00000541749	ENSG00000256232	LINC02387	0.007964	0	0	0	0	0	0	0	0
ENST00000563933	ENSG00000260943	LINC02555	0	0	0	0	0	0	0.004804	0	0
ENST00000536112	ENSG00000251301	LINC02384	0	0	0	0	0	0	0	0	0
ENST00000549357	ENSG00000258053	AC025575.2	0	0	0	0	0	0	0	0	0
ENST00000617041	ENSG00000277738	AC126175.1	0	0	0	0	0	0	0	0	0
ENST00000542797	ENSG00000256258	AC117500.3	0	0	0	0	0	0	0	0	0
ENST00000622182	ENSG00000274373	AC148476.1	0	0	0	0	0	0	0	0	0
ENST00000499662	ENSG00000247381	PLUT	0	0	0	0	0	0	0	0	0
ENST00000566370	ENSG00000261097	LINC00563	0	0	0	0	0	0	0	0	0
ENST00000569288	ENSG00000261057	LINC00555	0	0	0	0	0	0	0	0	0
ENST00000610501	ENSG00000274002	AL135999.3	0	0	0	0	0	0	0	0	0
ENST00000554046	ENSG00000258753	AL359792.1	0	0	0	0	0	0	0	0	0
ENST00000560296	ENSG00000259483	AL355073.1	0	0	0	0	0	0	0	0	0
ENST00000554773	ENSG00000258556	LINC02322	0	0.009662	0	0	0	0	0	0	0
ENST00000553301	ENSG00000259031	AL845552.2	0	0	0	0	0	0	0	0	0
ENST00000557610	ENSG00000258748	AL359399.1	0	0	0	0	0	0	0	0	0
ENST00000620538	ENSG00000274307	AC023449.2	0	0	0	0	0	0	0	0	0
ENST00000558963	ENSG00000259737	AC087516.2	0	0	0	0	0	0	0	0	0
ENST00000568246	ENSG00000260392	AC090518.1	0	0	0	0	0	0	0	0	0
ENST00000561362	ENSG00000259590	LINC02244	0	0	0	0	0	0	0	0	0.013384
ENST00000561511	ENSG00000260532	AL031598.1	0	0	0	0	0	0	0	0	0
ENST00000650622	ENSG00000285567	AC074051.5	0	0	0	0	0	0	0	0	0
ENST00000567862	ENSG00000261310	AC009081.1	0	0	0	0	0	0	0	0	0
ENST00000602425	ENSG00000268754	LINC01081	0	0	0	0	0	0	0	0	0
ENST00000648331	ENSG00000285541	AC005548.1	0	0	0	0	0	0	0	0	0
ENST00000578585	ENSG00000264215	AC126365.1	0	0	0	0	0	0	0	0	0
ENST00000613683	ENSG00000273650	AC100793.4	0	0	0	0	0	0	0	0	0
ENST00000583854	ENSG00000263574	AC125421.1	0	0	0	0	0	0	0	0	0
ENST00000321800	ENSG00000177338	LINC00469	0	0	0	0	0	0	0	0	0
ENST00000592198	ENSG00000267051	AP005229.1	0	0	0	0	0	0	0	0	0
ENST00000636467	ENSG00000283503	LINC01902	0	0	0	0	0	0	0	0	0
ENST00000649672	ENSG00000285748	AC090337.2	0	0	0	0	0	0	0	0	0
ENST00000583702	ENSG00000264340	AC009704.1	0	0	0	0	0	0	0	0	0
ENST00000591533	ENSG00000267124	AC016588.1	0	0	0	0	0	0	0	0	0
ENST00000536898	ENSG00000205786	LINC01531	0	0	0	0	0	0	0	0	0
ENST00000594721	ENSG00000268734	AC245128.3	0	0	0	0	0	0	0	0	0
ENST00000382045	ENSG00000205837	LINC00487	0	0	0	0	0	0	0.00361	0	0
ENST00000340444	ENSG00000188525	AC010969.1	0	0	0	0	0	0	0	0	0.002987
ENST00000647894	ENSG00000285876	AC093912.1	0	0	0	0	0	0	0	0	0
ENST00000443897	ENSG00000234597	AC010096.1	0	0	0	0	0	0	0	0	0
ENST00000415245	ENSG00000233714	AC012506.3	0	0	0	0	0	0	0	0	0
ENST00000615411	ENSG00000278060	AC012366.1	0	0	0.016691	0	0	0	0	0	0
ENST00000567067	ENSG00000261600	AC233266.2	0	0	0	0	0	0	0	0	0
ENST00000497618	ENSG00000275655	RN7SL313P	0	0	0	0	0	0	0	0	0
ENST00000432583	ENSG00000226516	FAM138B	0	0	0	0	0	0.003357	0	0.003357	0
ENST00000444963	ENSG00000229774	AC018866.1	0	0	0	0	0	0	0	0	0
ENST00000474689	ENSG00000242696	RN7SL40P	0	0	0	0	0	0	0	0	0
ENST00000488553	ENSG00000242348	RN7SL561P	0	0	0	0	0	0	0	0	0
ENST00000651029	ENSG00000286087	AL133331.1	0	0	0	0	0	0	0	0	0
ENST00000428999	ENSG00000237423	LINC01522	0	0	0	0	0	0	0	0	0
ENST00000651871	ENSG00000286063	AL121888.1	0	0	0	0	0	0	0	0	0
ENST00000625080	ENSG00000176659	C20orf197	0	0	0	0	0	0	0	0	0
ENST00000430184	ENSG00000223669	AL357033.2	0	0	0	0	0	0	0	0	0
ENST00000623753	ENSG00000279669	AC079801.1	0	0	0	0	0	0	0	0	0
ENST00000651753	ENSG00000230978	LINC00160	0	0	0	0	0	0	0	0	0
ENST00000436845	ENSG00000231231	LINC01423	0	0	0	0	0	0	0	0	0
ENST00000440363	ENSG00000233756	DSCAM-IT1	0	0	0	0	0	0	0	0	0
ENST00000447535	ENSG00000233056	ERVH48-1	0.001236	0	0.001369	0	0	0	0	0	0
ENST00000588548	ENSG00000283633	AP000547.3	0	0	0	0	0	0	0	0	0
ENST00000485262	ENSG00000239547	RN7SL843P	0	0	0	0	0	0	0	0	0
ENST00000407120	ENSG00000220891	AC246793.1	0	0	0	0	0	0	0	0	0
ENST00000426467	ENSG00000226741	LINC02554	0	0	0	0	0	0	0	0	0
ENST00000631502	ENSG00000282041	Z82244.1	0	0	0	0	0	0	0	0	0.002831
ENST00000648313	ENSG00000285707	AL008720.1	0	0	0	0	0	0	0	0	0
ENST00000647668	ENSG00000285614	AC026100.1	0	0.010368	0	0	0	0	0	0	0
ENST00000450500	ENSG00000225790	AC007953.1	0	0	0	0	0	0	0	0	0
ENST00000482787	ENSG00000242512	LINC01206	0.000406	0	0	0	0	0	0	0	0
ENST00000608042	ENSG00000242512	LINC01206	0	0	0	0	0	0	0	0	0
ENST00000609168	ENSG00000242512	LINC01206	0	0	0	0	0	0	0	0	0
ENST00000440726	ENSG00000228952	LINC02041	0	0	0	0	0	0	0	0	0
ENST00000509666	ENSG00000251410	AC007106.1	0	0	0	0	0	0	0	0	0
ENST00000512170	ENSG00000251635	LINC02278	0	0	0	0	0	0	0	0	0
ENST00000513519	ENSG00000248491	AC093772.1	0	0	0	0	0	0	0	0	0
ENST00000512831	ENSG00000248431	AC005150.1	0.006597	0	0	0	0	0	0	0	0
ENST00000512263	ENSG00000250708	LINC02269	0	0	0	0	0	0	0	0	0
ENST00000501825	ENSG00000245685	FRG1-DT	0	0	0	0	0	0	0	0	0
ENST00000504989	ENSG00000250584	LINC01511	0	0	0	0	0	0	0	0	0
ENST00000626215	ENSG00000281560	LSINCT5	0	0	0	0	0	0	0	0	0
ENST00000508853	ENSG00000248461	LINC02119	0	0	0	0	0	0	0	0	0
ENST00000511953	ENSG00000250447	LINC02105	0	0	0	0	0	0	0	0	0.004119
ENST00000427584	ENSG00000249743	AC116345.1	0	0	0	0	0	0	0	0	0.003473
ENST00000520032	ENSG00000253321	AC099554.1	0	0	0	0	0	0	0	0	0
ENST00000432677	ENSG00000236714	LINC01844	0	0	0	0	0	0	0	0	0
ENST00000649453	ENSG00000285578	AL035696.4	0	0	0	0	0	0	0	0	0
ENST00000624527	ENSG00000164385	LINC01600	0.003226	0	0	0	0	0	0	0	0
ENST00000430821	ENSG00000226707	AL359458.1	0	0	0	0	0	0	0	0	0
ENST00000421737	ENSG00000232316	LINC02518	0	0	0	0	0	0	0	0	0
ENST00000454262	ENSG00000229923	AL583803.1	0	0	0	0	0	0	0	0	0
ENST00000416593	ENSG00000233942	AC004012.1	0	0	0	0	0	0	0	0	0
ENST00000478997	ENSG00000239825	RN7SL549P	0	0	0	0	0	0	0	0	0
ENST00000595842	ENSG00000268170	AC073342.2	0	0.002592	0	0	0	0	0	0	0
ENST00000519048	ENSG00000253926	AC011257.1	0	0	0	0	0	0	0	0	0
ENST00000520149	ENSG00000253593	AC110741.1	0	0	0	0	0	0	0	0	0
ENST00000625222	ENSG00000281769	LINC01230	0	0	0	0	0	0	0	0	0
ENST00000608422	ENSG00000272866	AL135786.2	0	0	0	0.011601	0	0	0	0	0
ENST00000610061	ENSG00000272871	AL159169.2	0	0	0	0	0	0	0	0	0
ENST00000460537	ENSG00000244230	RN7SL151P	0	0	0	0	0	0	0	0	0.025459
ENST00000562922	ENSG00000260390	AL360014.1	0	0	0	0	0	0	0	0	0
ENST00000566293	ENSG00000260412	AL353746.1	0	0.001275	0	0	0	0	0	0	0
ENST00000422764	ENSG00000233776	LINC01251	0	0	0	0	0	0	0	0	0
ENST00000444956	ENSG00000233776	LINC01251	0	0	0	0	0	0	0	0	0
ENST00000425493	ENSG00000229311	BX088651.2	0	0	0	0	0	0	0	0	0
ENST00000417801	ENSG00000230945	LINC01507	0	0	0	0	0	0	0	0	0
ENST00000423380	ENSG00000230537	AL158071.3	0	0	0	0	0	0	0	0	0.00555
ENST00000455981	ENSG00000224307	AL161785.1	0	0	0	0	0	0	0	0	0
ENST00000440413	ENSG00000236024	PRRX2-AS1	0	0	0	0	0	0	0	0	0
ENST00000650654	ENSG00000235572	AL353615.1	0	0	0	0	0	0	0	0	0
ENST00000608735	ENSG00000228933	AC107419.1	0	0	0	0	0	0	0	0	0
ENST00000649506	ENSG00000241743	XACT	0	0	0	0	0	0	0	0	0
ENST00000614439	ENSG00000275070	RF00017	0.000627	0	0	0	0	0.014345	0	0.014345	0.005
TCONS_00001618	ENSG00000142609	CFAP74	0	0	0	0	0.022628	0	0	0	0.002946
TCONS_00002808	ENSG00000142621	FHAD1	0.002003	0	0.005838	0.007053	0	0	0.006126	0	0
TCONS_00023625	ENSG00000001460	STPG1	0	0	0	0	0	0	0	0	0
TCONS_00023834	XLOC_009620	XLOC_009620	0	0	0	0	0	0	0	0	0
TCONS_00004364	ENSG00000175707	KDF1	0	0	0	0	0	0	0	0	0
TCONS_00024238	ENSG00000204138	PHACTR4	0	0	0	0	0	0	0	0	0
TCONS_00025345	ENSG00000158315	RHBDL2	0	0	0	0	0	0	0	0	0
TCONS_00006150	XLOC_002650	XLOC_002650	0.002537	5.9e-05	0	0	0	0.018873	0	0.018873	0
TCONS_00008199	XLOC_003295	XLOC_003295	0	0	0	0	0	0	0	0	0.036144
TCONS_00008178	ENSG00000184588	PDE4B	0	0	0	0	0	0	0	0	0
TCONS_00027727	ENSG00000033122	LRRC7	0	0	0	0	0	0	0.042548	0	0
TCONS_00010030	XLOC_004119	XLOC_004119	0	0	0	0	0	0	0	0	0
TCONS_00011363	ENSG00000134198	TSPAN2	0	0	0	0	0	0	0	0	0
TCONS_00011966	XLOC_004934	XLOC_004934	0	0	0	0	0	0	0	0	0
TCONS_00031003	ENSG00000162825	NBPF20	0.002157	0	0	0	0.000742	0.001819	0	0.001819	0
TCONS_00016564	ENSG00000143355	LHX9	0	0	0	0	0	0	0	0	0
TCONS_00038132	XLOC_015547	XLOC_015547	0	0.027369	0.02592	0.126017	0	0	0.019886	0	0.135109
TCONS_00039329	ENSG00000107929	LARP4B	0	0	0	0	0	0	0	0	0
TCONS_00039498	XLOC_016279	XLOC_016279	0	0	0	0	0	0	0	0	0
TCONS_00047406	XLOC_019825	XLOC_019825	0	0	0	0	0.063509	0	0	0	0.015949
TCONS_00039989	ENSG00000183049	CAMK1D	0	0	0	0	0	0	0	0	0
TCONS_00041812	XLOC_017288	XLOC_017288	0.011543	0	0	0.035827	0	0	0.026774	0	0.015798
TCONS_00041876	ENSG00000277758	FO681492.1	0	0	0	0	0	0	0	0	0
TCONS_00050585	ENSG00000204130	RUFY2	0	0.016287	0	0	0	0.038524	0	0.038524	0
TCONS_00067613	ENSG00000166407	LMO1	0	0	0	0	0	0	0	0	0
TCONS_00067875	ENSG00000133805	AMPD3	0	0	0	0	0	0	0	0	0
TCONS_00056832	ENSG00000129158	SERGEF	0	0	0	0	0	0	0.008991	0	0.017881
TCONS_00069161	ENSG00000148950	IMMP1L	0	0	0	0	0.606615	0	0	0	0
TCONS_00069455	XLOC_028523	XLOC_028523	0.007606	0	0	0	0	0	0	0	0.020052
TCONS_00057807	XLOC_024324	XLOC_024324	0	0	0	0	0	0.016059	0	0.016059	0.001598
TCONS_00071677	XLOC_029350	XLOC_029350	0.006461	0	0	0.000177	0	0	0	0	0
TCONS_00073828	ENSG00000166435	XRRA1	0	0	0	0	0	0	0	0	0
TCONS_00074082	ENSG00000074201	CLNS1A	0	0	0	0	0	0	0	0	0
TCONS_00062664	ENSG00000087884	AAMDC	0	0	0	0	0	0	0	0	0
TCONS_00063211	XLOC_026166	XLOC_026166	0	0	0	0.037877	0	0	0	0	0
TCONS_00063738	XLOC_026428	XLOC_026428	0	0	0	0	0	0.025686	0	0.025686	0.021657
TCONS_00066110	XLOC_027278	XLOC_027278	0	0	0	0	0	0.019713	0	0.019713	0
TCONS_00078464	XLOC_031963	XLOC_031963	0	0	0	0	0	0	0	0	0
TCONS_00079524	XLOC_032301	XLOC_032301	0	0	0	0	0	0	0	0	0
TCONS_00079962	XLOC_032514	XLOC_032514	0	0	0	0	0	0	0	0	0
TCONS_00090864	ENSG00000172572	PDE3A	0	0	0	0	0	0	0	0	0
TCONS_00091035	ENSG00000134532	SOX5	0	0	0	0	0	0	0	0	0
TCONS_00096854	ENSG00000179088	C12orf42	0	0	0.001011	0	0	0	0	0	0
TCONS_00087347	ENSG00000183273	CCDC60	0	0	0	0	0	0	0	0	0.008609
TCONS_00099518	ENSG00000182870	GALNT9	0	0	0	0	0	0.007245	0	0.007245	0
TCONS_00105616	ENSG00000188342	GTF2F2	0	0	0	0	0	0	0	0	0.003822
TCONS_00101532	ENSG00000136169	SETDB2	0.021859	0	0.003394	0	0.008846	0	0	0	0.003387
TCONS_00107489	ENSG00000125246	CLYBL	0	0	0	0	0	0	0.020719	0	0
TCONS_00110047	XLOC_045001	XLOC_045001	0	0	0	0	0	0	0	0	0
TCONS_00110241	XLOC_045093	XLOC_045093	0	0	0	0	0.008346	0.008053	0	0.008053	0.004889
TCONS_00111698	ENSG00000182185	RAD51B	0	0	0	0	0	0	0	0	0.006788
TCONS_00118843	XLOC_048385	XLOC_048385	0	0	0	0	0	0	0	0	0
TCONS_00114278	ENSG00000140153	WDR20	0	0	0	0	0	0	0	0	0
TCONS_00123232	XLOC_050265	XLOC_050265	0	0	0	0	0	0	0.01496	0	0
TCONS_00125231	ENSG00000103769	RAB11A	0	0	0	0	0	0	0	0	0
TCONS_00125266	ENSG00000075131	TIPIN	0	0	0	0.000739	0.012755	0	0	0	0
TCONS_00132220	XLOC_053455	XLOC_053455	0.017186	0.009004	0	0	0	0	0	0	0.013346
TCONS_00137534	ENSG00000179889	PDXDC1	0	0.01688	0	0	0	0.032331	0	0.032331	0
TCONS_00148746	ENSG00000155393	HEATR3	0	0.026826	0.015762	0	0	0	0	0	0
TCONS_00149906	ENSG00000159714	ZDHHC1	0	0.025052	0	0	0	0	0	0	0
TCONS_00151018	ENSG00000103091	WDR59	0	0	0.000579	0	0.007595	0	3.8e-05	0	0.002689
TCONS_00151727	XLOC_059423	XLOC_059423	0	0	0.031395	0	0	0	0	0	0
TCONS_00165238	XLOC_063633	XLOC_063633	0	0	0	0	0	0	0	0	0
TCONS_00166971	ENSG00000271447	MMP28	0	0	0	0	0	0	0	0	0
TCONS_00168016	ENSG00000131473	ACLY	0.011538	0	0.006058	0	0	0	0	0	0.027166
TCONS_00158302	ENSG00000262633	AC005670.2	0	0	0	0	0	0	0	0	0
TCONS_00170162	XLOC_065189	XLOC_065189	0	0	0	0	0	0	0	0	0
TCONS_00159825	ENSG00000267318	AC005702.1	0	0	0.011438	0	0.028284	0	0	0	0
TCONS_00160907	ENSG00000069188	SDK2	0	0	0	0	0	0	0.023569	0	0
TCONS_00176104	XLOC_067234	XLOC_067234	0	0	0	0	0	0.007848	0	0.007848	0
TCONS_00176422	ENSG00000184828	ZBTB7C	0	0	0	0	0	0	0	0	0
TCONS_00180472	XLOC_069229	XLOC_069229	0	0	0	0	0	0	0	0	0.022093
TCONS_00181629	ENSG00000180011	ZADH2	0	0	0	0	0	0	0	0	0
TCONS_00182046	ENSG00000129951	PLPPR3	0	0	0	0	0.042013	0	0	0	0
TCONS_00182702	ENSG00000104953	TLE6	0.003354	0	0	0.00172	0.002839	0	0	0	0.003245
TCONS_00192523	ENSG00000186230	ZNF749	0.004792	0	0	0.002597	0	0	0	0	0
TCONS_00204640	ENSG00000178295	GEN1	0.007885	0	0	0.000216	0	0	0	0	0
TCONS_00221947	ENSG00000143924	EML4	0	0	0	0	0	0	0	0	0
TCONS_00222842	XLOC_084194	XLOC_084194	0	0	0	0	0	0	0	0	0
TCONS_00208586	XLOC_078243	XLOC_078243	0	0.001163	0	0	0	0	0.002214	0	0
TCONS_00208630	ENSG00000115364	MRPL19	0	0	0	0	0	0.060551	0	0.060551	0
TCONS_00224348	ENSG00000005436	GCFC2	0	0	0	0	0.008994	0	0.014449	0	0.003906
TCONS_00226327	XLOC_085591	XLOC_085591	0.006844	0	0.003944	0	0.00383	0.002393	0	0.002393	0.005105
TCONS_00226718	XLOC_085785	XLOC_085785	0	0	0	0	0.035304	0	0	0	0
TCONS_00211501	ENSG00000088179	PTPN4	0.028997	0	0.005326	0.222833	0.008775	0.18316	0	0.18316	0.056315
TCONS_00227492	XLOC_086178	XLOC_086178	0	0	0	0	0	0	0	0	0
TCONS_00212621	XLOC_080052	XLOC_080052	0	0	0	0	0	0	0	0	0
TCONS_00212637	XLOC_080065	XLOC_080065	0	0	0	0	0	0	0	0	0.02496
TCONS_00212869	XLOC_080143	XLOC_080143	0	0	0	0	0	0	0	0	0
TCONS_00228480	XLOC_086680	XLOC_086680	0.001565	0.001356	0	0	0	0	0.001862	0	0
TCONS_00213036	XLOC_080206	XLOC_080206	0	0	0	0	0	0	0	0	0
TCONS_00229662	ENSG00000071909	MYO3B	0	0	0	0	0	0	0	0	0
TCONS_00216348	ENSG00000178385	PLEKHM3	0	0	0	0	0	0	0	0	0
TCONS_00233174	XLOC_088673	XLOC_088673	0	0	0	0	0	0	0	0	0
TCONS_00219148	ENSG00000176720	BOK	0	0	0	0	0	0	0.000199	0	0
TCONS_00219109	ENSG00000006607	FARP2	0.012032	0	0.011843	0.014762	0.010051	0.00946	0.006159	0.00946	0.045249
TCONS_00240550	ENSG00000089101	CFAP61	0	0	0	0	0	0	0	0	0
TCONS_00236101	ENSG00000171552	BCL2L1	0.007199	0.004435	0.027483	0.002758	0.008798	0.017712	0.003289	0.017712	0.002641
TCONS_00246378	XLOC_094473	XLOC_094473	0	0	0	0	0	0	0	0	0
TCONS_00249853	XLOC_096039	XLOC_096039	0	0	0	0	0.006552	0.023579	0.025649	0.023579	0
TCONS_00256884	ENSG00000100146	SOX10	0	0	0	0	0	0	0	0	0.016
TCONS_00270921	ENSG00000144455	SUMF1	0	0	0	0	0	0	0	0	0
TCONS_00261608	ENSG00000183625	CCR3	0	0	0	0	0	0	0	0	0
TCONS_00262637	ENSG00000010318	PHF7	0	0	0	0	0	0	0	0	0
TCONS_00263962	XLOC_101012	XLOC_101012	0.0393	0	0	0	0	0	0	0	0
TCONS_00263981	XLOC_101030	XLOC_101030	0	0.013299	0	0	0	0.015114	0	0.015114	0
TCONS_00265774	ENSG00000160145	KALRN	0	0	0	0	0	0.017313	0.000253	0.017313	0
TCONS_00278526	ENSG00000189366	ALG1L	0	0	0	0	0	0	0	0	0.015745
TCONS_00266502	ENSG00000129048	ACKR4	0	0	0	0	0	0	0	0	0
TCONS_00266682	XLOC_102266	XLOC_102266	0	0	0	0	0	0.020319	0	0.020319	0
TCONS_00279459	XLOC_107443	XLOC_107443	0	0	0	0	0	0.004062	0	0.004062	0
TCONS_00279942	XLOC_107670	XLOC_107670	0	0	0	0	0	0.015539	0	0.015539	0
TCONS_00280363	XLOC_107868	XLOC_107868	0	0	0	0	0.00809	0	0	0	0
TCONS_00280266	ENSG00000120742	SERP1	0	0	0.000102	0.000513	0	0.00131	0.000407	0.00131	0.000608
TCONS_00268083	XLOC_102964	XLOC_102964	0	0	0	0	0	0.027651	0	0.027651	0
TCONS_00268424	XLOC_103083	XLOC_103083	0	0	0.011153	0	0	0	0	0	0
TCONS_00269969	ENSG00000127241	MASP1	0	0	0	0	0	0	0	0	0
TCONS_00293253	ENSG00000169762	TAPT1	0	0	0	0	0	0	0	0	0
TCONS_00285641	ENSG00000179299	NSUN7	0	0	0	0	0	0	0	0	0
TCONS_00285659	ENSG00000163697	APBB2	0	0	0	0	0	0.016276	0	0.016276	0
TCONS_00294332	XLOC_114241	XLOC_114241	0.007017	0.00599	0	0	0	0	0.001107	0	0.000791
TCONS_00287634	ENSG00000138639	ARHGAP24	0	0	0	0	0	0.000639	0.001834	0.000639	0.017799
TCONS_00296394	ENSG00000109339	MAPK10	0	0	0.007385	0	0	0	0	0	0
TCONS_00296574	ENSG00000138642	HERC6	0	0	0	0	0	0.00224	0	0.00224	0
TCONS_00296575	ENSG00000138642	HERC6	0	0	0	0	0	0	0	0	0
TCONS_00296629	ENSG00000138640	FAM13A	0.001231	0	0	0	0.001201	0.00169	0	0.00169	0
TCONS_00289047	ENSG00000138688	KIAA1109	0	0	0	0.061582	0	0	0	0	0
TCONS_00290289	XLOC_112195	XLOC_112195	0	0	0	0	0	0.001505	0	0.001505	0
TCONS_00311556	ENSG00000066230	SLC9A3	0.000222	0.013471	0.003462	0	0.001736	0.008167	0.015247	0.008167	0.012292
TCONS_00301219	XLOC_117379	XLOC_117379	0	0	0	0	0	0	0	0	0
TCONS_00302384	XLOC_118028	XLOC_118028	0	0	0	0	0	0	0	0	0
TCONS_00302420	ENSG00000112964	GHR	0	0	0	0	0	0	0	0	0
TCONS_00313861	XLOC_123271	XLOC_123271	0	0	0	0	0	0	0	0	0
TCONS_00313864	XLOC_123271	XLOC_123271	0.009673	0	0	0	0	0.001623	0	0.001623	0.019858
TCONS_00303544	XLOC_118671	XLOC_118671	0	0.029538	0	0	0	0.000924	0	0.000924	0
TCONS_00315162	XLOC_123965	XLOC_123965	0	0	0	0	0	0	0	0	0
TCONS_00304550	ENSG00000284762	AC022414.1	0	0	0	0	0	0	0	0	0
TCONS_00317211	ENSG00000186952	TMEM232	0	0	0.005713	0	0	0	0	0	0
TCONS_00306199	ENSG00000164209	SLC25A46	0	0	0	0	0	0	0	0	0.056439
TCONS_00306542	XLOC_120066	XLOC_120066	0	0	0	0	0	0.007543	0	0.007543	0
TCONS_00306587	XLOC_120105	XLOC_120105	0	0	0	0	0	0	0	0	0
TCONS_00318840	ENSG00000152377	SPOCK1	0	0	0.002032	0	0	0	0	0	0
TCONS_00309272	ENSG00000145888	GLRA1	0	0	0	0	0	0	0	0	0
TCONS_00321180	XLOC_126883	XLOC_126883	0	0	0	0	0	0	0.009953	0	0.016946
TCONS_00321551	ENSG00000131183	SLC34A1	0	0	0	0	0	0	0	0	0
TCONS_00310976	ENSG00000170074	FAM153A	0	0	0	0	0	0	0	0	0
TCONS_00322199	ENSG00000196670	ZFP62	0	0.071891	0	0	0	0	0	0	0
TCONS_00322478	XLOC_127353	XLOC_127353	0	0	0	0	0.030874	0	0	0	0
TCONS_00322831	XLOC_127548	XLOC_127548	0	0	0	0	0	0	0	0	0.012912
TCONS_00323073	ENSG00000137203	TFAP2A	0.080797	0	0	0	0	0	0	0	0
TCONS_00327598	ENSG00000188107	EYS	0.014339	0.010499	0.00727	0	0	0	0	0	0
TCONS_00338653	XLOC_135132	XLOC_135132	0	0	0	0	0	0	0	0	0
TCONS_00329296	XLOC_130630	XLOC_130630	0	0	0	0	0	0	0	0	0.023196
TCONS_00340544	XLOC_136175	XLOC_136175	0	0	0	0	0	0	0.009803	0	0
TCONS_00340666	ENSG00000196591	HDAC2	0	0	0	0	0	0	0	0	0.008343
TCONS_00331223	ENSG00000197442	MAP3K5	0	0	0	0	0	0	0	0	0
TCONS_00331864	XLOC_132033	XLOC_132033	0	0	0	0	0	0	0	0	0.01434
TCONS_00343351	ENSG00000112541	PDE10A	0	0	0	0.014929	8.5e-05	0	0	0	0.014165
TCONS_00343458	ENSG00000166984	TCP10L2	0	0	0	0	0	0	0	0	0
TCONS_00344481	ENSG00000146574	CCZ1B	0.041978	0	0.036068	0.025288	0	0	0	0	0
TCONS_00345268	XLOC_138265	XLOC_138265	0	0	0	0	0	0	0	0	0
TCONS_00346693	XLOC_138845	XLOC_138845	0	0	0	0	0	0	0	0	0
TCONS_00356748	XLOC_142984	XLOC_142984	0	0	0	0	0	0	0	0	0
TCONS_00348399	ENSG00000188372	ZP3	0	0	0	0	0	0	0	0	0
TCONS_00348461	XLOC_139692	XLOC_139692	0	0	0	0	0	0	0	0	0
TCONS_00348804	XLOC_139853	XLOC_139853	0	0	0.01814	0	0.019568	0	0	0	0
TCONS_00349437	ENSG00000196636	SDHAF3	0	0	0	0	0	0	0.002486	0	0
TCONS_00349444	ENSG00000196636	SDHAF3	0	0	0	0.001873	0.001274	0	0.005032	0	0
TCONS_00360181	XLOC_144293	XLOC_144293	0	0	0	0	0.033311	0	0	0	0
TCONS_00360904	ENSG00000184903	IMMP2L	0	0.036328	0	0	0	0	0	0	0
TCONS_00361056	ENSG00000105967	TFEC	0	0	0	0	0	0	0	0	0
TCONS_00373188	XLOC_149983	XLOC_149983	0	0	0	0	0	0	0	0	0.029247
TCONS_00375746	ENSG00000147601	TERF1	0	0	0	0.007732	0	0	0	0	0
TCONS_00369144	XLOC_148251	XLOC_148251	0	0	0	0	0	0	0	0	0
TCONS_00369145	XLOC_148251	XLOC_148251	0.000643	0	0.001021	0	0	0	0	0	0
TCONS_00370152	XLOC_148777	XLOC_148777	0.003033	0	0	0	0	0	0	0	0
TCONS_00379237	ENSG00000042832	TG	0	0	0	0	0	0	0	0	0
TCONS_00380668	ENSG00000107104	KANK1	0	0	0	0	0	0	0	0	0
TCONS_00381475	ENSG00000155886	SLC24A2	0	0	0	0	0	0	0	0	0
TCONS_00391778	XLOC_158719	XLOC_158719	0	0	0	0	0	0	0	0	0.04129
TCONS_00383822	ENSG00000187210	GCNT1	0	0.028923	0	0	0	0.008525	0	0.008525	0
TCONS_00392587	XLOC_159217	XLOC_159217	0	0	0	0	0	0	0	0	0
TCONS_00392652	XLOC_159275	XLOC_159275	0	0	0	0	0	0	0	0	0
TCONS_00393140	XLOC_159542	XLOC_159542	0	0	0	0	0	0	0.028215	0	0
TCONS_00393370	XLOC_159616	XLOC_159616	0	0	0.007949	0	0	0	0	0	0
TCONS_00394242	XLOC_160043	XLOC_160043	0	0	0	0	0	0	0	0	0.042569
TCONS_00385930	ENSG00000188959	C9orf152	0	0	0	0	0.010011	0	0	0	0
TCONS_00386192	XLOC_156373	XLOC_156373	0	0	0	0	0	0	0	0	0
TCONS_00397516	XLOC_161392	XLOC_161392	0	0	0	0	0	0.003795	0	0.003795	0
TCONS_00397621	XLOC_161423	XLOC_161423	0	0	0	0	0	0	0	0	0
TCONS_00404857	ENSG00000073464	CLCN4	0.08132	0	0	0	0	0	0	0	0
TCONS_00397961	ENSG00000169933	FRMPD4	0.002604	0	0.00256	0.027359	0.000713	0	0.001167	0	0.003724
TCONS_00401737	ENSG00000102385	DRP2	0	0	0	0	0	0	0	0	0
TCONS_00403843	ENSG00000268916	CSAG3	0	0.010843	0.033179	0	0.062148	0	0	0	0.000682
TCONS_00000958	XLOC_000701	XLOC_000701	0	0	0	0	0	0	0.020092	0	0
TCONS_00000938	XLOC_000681	XLOC_000681	0.031151	0	0	0.011293	0	0	0	0	0
TCONS_00000704	XLOC_000517	XLOC_000517	0	0	0	0	0	0	0	0	0
TCONS_00000803	XLOC_000608	XLOC_000608	1.40263	0	0	0	0	0.009799	0	0.009799	0
TCONS_00000810	XLOC_000608	XLOC_000608	0	0	0	0	0	0.609011	0.989991	0.609011	0
TCONS_00000816	XLOC_000608	XLOC_000608	0	0	0	0	0	0	0	0	15.6333
TCONS_00001103	XLOC_000816	XLOC_000816	0	0	0	0	0	0	0	0	0
TCONS_00000311	XLOC_000209	XLOC_000209	0	0	0	0	0	0	0	0	0
TCONS_00021869	XLOC_008837	XLOC_008837	0	0	0	0	0	0	0	0	0
TCONS_00023375	XLOC_009451	XLOC_009451	0	0	0	0	0	0	0	0	0
TCONS_00023691	XLOC_009571	XLOC_009571	0	0	0	0	0	0	0	0	0
TCONS_00004436	XLOC_002012	XLOC_002012	0	0	0	0	0	0	0	0	0.03647
TCONS_00025310	XLOC_010173	XLOC_010173	0	0	0	0	0	0	0	0	0
TCONS_00027286	XLOC_010868	XLOC_010868	0	0.027164	0	0	0	0.010808	0.013702	0.010808	0
TCONS_00010495	XLOC_004350	XLOC_004350	0	0	0	0	0	0	0	0	0
TCONS_00034755	ENSG00000116147	TNR	0	0	0	0	0	0	0.037488	0	0
TCONS_00034795	ENSG00000152092	ASTN1	0	0	0	0	0	0	0	0	0
TCONS_00015928	ENSG00000135824	RGS8	0	0	0	0.021405	0	0	0	0	0.021544
TCONS_00016653	XLOC_006767	XLOC_006767	0	0	0	0	0	0	0	0	0
TCONS_00037222	XLOC_015109	XLOC_015109	0	0	0	0	0	0	0	0	0
TCONS_00047408	XLOC_019826	XLOC_019826	0	0	0	0	0	0	0	0	0
TCONS_00047450	XLOC_019856	XLOC_019856	0	0	0	0	0	0	0	0	0
TCONS_00040241	XLOC_016557	XLOC_016557	0	0	0	0	0	0	0	0	0
TCONS_00043528	XLOC_018084	XLOC_018084	0	0	0	0	0	0	0.025868	0	0
TCONS_00054770	ENSG00000171798	KNDC1	0	0	0	0	0	0	0	0	0
TCONS_00054772	XLOC_023245	XLOC_023245	0	0	0	0	0	0	0	0	0.023424
TCONS_00054970	XLOC_023323	XLOC_023323	0	0	0	0	0	0	0	0	0
TCONS_00054971	XLOC_023324	XLOC_023324	0	0	0	0	0	0	0	0	0
TCONS_00055600	XLOC_023489	XLOC_023489	0.012103	0	0	0	0	0	0	0	0
TCONS_00073108	XLOC_029743	XLOC_029743	0	0	0	0	0	0.042813	0.013254	0.042813	0.002498
TCONS_00079917	XLOC_032478	XLOC_032478	0	0	0	0	0	0	0	0	0
TCONS_00080557	XLOC_032754	XLOC_032754	0	0	0	0	0	0	0	0	0
TCONS_00081058	XLOC_032972	XLOC_032972	0	0	0	0	0	0	6.1e-05	0	0
TCONS_00094647	XLOC_037854	XLOC_037854	0.017933	0	0	0	0	0	0	0	0
TCONS_00097194	XLOC_039064	XLOC_039064	0.004202	0	0	0	0	0	0	0	0
TCONS_00087325	XLOC_035320	XLOC_035320	0	0	0	0	0	0	0	0	0
TCONS_00099326	XLOC_039724	XLOC_039724	0	0	0	0	0	0	0	0	0
TCONS_00088430	XLOC_035705	XLOC_035705	0	0	0	0	0	0	0	0	0
TCONS_00088482	XLOC_035721	XLOC_035721	0	0	0	0	0	0	0	0	0
TCONS_00099529	XLOC_039830	XLOC_039830	0	0	0	0	0	0	0	0	0
TCONS_00102728	XLOC_041429	XLOC_041429	0	0	0	0	0	0	0	0	0
TCONS_00102928	XLOC_041569	XLOC_041569	0.026524	0	0	0	0	0	0	0	0
TCONS_00107978	XLOC_044171	XLOC_044171	0	0	0	0	0	0	0.035748	0	0.008332
TCONS_00114945	XLOC_046877	XLOC_046877	0	0	0	0	0	0	0	0	0.015731
TCONS_00110122	XLOC_045031	XLOC_045031	0	0	0	0	0	0	0	0	0
TCONS_00111541	XLOC_045614	XLOC_045614	0	0	0	0	0	0	0	0	0
TCONS_00113482	XLOC_046355	XLOC_046355	0	0	0	0	0	0	0	0	0.031326
TCONS_00113735	XLOC_046449	XLOC_046449	0	0	0	0	0	0	0	0	0
TCONS_00113941	XLOC_046534	XLOC_046534	0	0	0.007764	0	0	0	0	0	0
TCONS_00114498	XLOC_046739	XLOC_046739	0	0	0	0	0	0	0	0	0
TCONS_00122771	XLOC_050073	XLOC_050073	0	0.017573	0	0	0	0.013968	0	0.013968	0
TCONS_00147254	XLOC_057959	XLOC_057959	0	0	0	0	0	0	0	0	0
TCONS_00148709	XLOC_058460	XLOC_058460	0	0	0	0	0	0.020014	0	0.020014	0.009982
TCONS_00157572	XLOC_061312	XLOC_061312	0	0	0	0	0	0	0.031358	0	0
TCONS_00159345	XLOC_061831	XLOC_061831	0.058048	0	0	0	0	0	0	0	0
TCONS_00159356	XLOC_061842	XLOC_061842	0	0	0	0	0	0	0.022693	0	0
TCONS_00170297	XLOC_065314	XLOC_065314	0	0	0	0	0	0	0	0	0
TCONS_00170452	XLOC_065371	XLOC_065371	0	0	0	0	0	0	0	0	0
TCONS_00161963	XLOC_062740	XLOC_062740	0	0	0	0	0	0	0	0	0
TCONS_00179542	XLOC_068828	XLOC_068828	0	0	0	0	0	0	0	0	0
TCONS_00193807	XLOC_073374	XLOC_073374	0	0	0	0	0	0	0.028822	0	0
TCONS_00185787	XLOC_071092	XLOC_071092	0	0	0	0	0	0	0	0	0
TCONS_00186551	XLOC_071334	XLOC_071334	0	0	0	0	0	0.007658	0.01797	0.007658	0
TCONS_00198071	XLOC_074657	XLOC_074657	0	0	0	0	0	0	0	0	0
TCONS_00223376	XLOC_084453	XLOC_084453	0	0	0	0	0	0	0	0	0
TCONS_00227251	XLOC_086085	XLOC_086085	0	0	0	0	0	0	0	0	0
TCONS_00228633	XLOC_086867	XLOC_086867	0	0	0	0	0	0	0	0	0
TCONS_00213202	XLOC_080303	XLOC_080303	0	0	0	0	0	0	0	0	0
TCONS_00230900	XLOC_087792	XLOC_087792	0	0	0	0	0	0	0	0	0
TCONS_00241010	XLOC_092045	XLOC_092045	0	0	0	0	0	0	0	0	0
TCONS_00242351	XLOC_092628	XLOC_092628	0	0	0	0	0	0	0	0	0.013525
TCONS_00237919	XLOC_090654	XLOC_090654	0	0	0	0	0	0	0	0	0
TCONS_00238307	XLOC_090883	XLOC_090883	0	0	0	0	0	0	0	0	0.012337
TCONS_00238356	XLOC_090917	XLOC_090917	0	0	0	0	0	0	0	0	0
TCONS_00243518	XLOC_093241	XLOC_093241	0	0	0	0	0	0	0	0	0
TCONS_00243643	XLOC_093280	XLOC_093280	0	0	0	0	0	0	0	0	0
TCONS_00247279	XLOC_094795	XLOC_094795	0	0	0	0	0	0	0	0	0
TCONS_00247286	XLOC_094802	XLOC_094802	0	0	0	0	0	0	0	0	0
TCONS_00247544	XLOC_094942	XLOC_094942	0	0	0	0	0	0	0.005552	0	0
TCONS_00244787	XLOC_093787	XLOC_093787	0	0	0	0	0	0	0	0	0
TCONS_00251304	ENSG00000100122	CRYBB1	0.039556	0	0	0	0	0	0	0	0
TCONS_00257774	XLOC_098932	XLOC_098932	0	0.015682	0	0	0	0	0	0	0.006085
TCONS_00257938	XLOC_099018	XLOC_099018	0	0	0	0	0	0.017306	0.022859	0.017306	0.015983
TCONS_00270835	XLOC_103992	XLOC_103992	0	0	0	0	0	0	0.014274	0	0
TCONS_00258595	XLOC_099186	XLOC_099186	0	0	0	0	0	0	0	0	0
TCONS_00277308	XLOC_106593	XLOC_106593	0	0	0.019578	0	0	0	0	0	0
TCONS_00266002	XLOC_102009	XLOC_102009	0	0	0	0	0	0	0	0	0
TCONS_00279872	XLOC_107616	XLOC_107616	0	0	0	0.028864	0	0	0	0	0
TCONS_00281067	XLOC_108191	XLOC_108191	0.019451	0	0	0	0	0	0	0	0
TCONS_00281325	XLOC_108277	XLOC_108277	0	0	0	0	0	0	0	0	0
TCONS_00284538	XLOC_109494	XLOC_109494	0	0	0	0	0	0	0	0	0
TCONS_00285293	XLOC_109858	XLOC_109858	0	0.021138	0	0	0	0	0	0	0
TCONS_00297924	XLOC_115762	XLOC_115762	0	0	0	0	0	0	0	0	0
TCONS_00289457	XLOC_111763	XLOC_111763	0	0	0	0.01449	0	0	0	0	0
TCONS_00300811	XLOC_117175	XLOC_117175	0	0	0	0	0	0	0	0	0
TCONS_00301227	XLOC_117387	XLOC_117387	0	0	0	0	0	0	0	0	0
TCONS_00301628	XLOC_117637	XLOC_117637	0	0	0	0	0	0.030767	0.00105	0.030767	0
TCONS_00312977	XLOC_122883	XLOC_122883	0	0	0	0	0	0	0.020955	0	0
TCONS_00302444	XLOC_118050	XLOC_118050	0	0	0	0	0	0	0	0	0
TCONS_00305281	XLOC_119415	XLOC_119415	0	0	0	0	0	0	0	0	0
TCONS_00316949	ENSG00000205359	SLCO6A1	0	0	0	0	0	0	0	0	0
TCONS_00316950	ENSG00000205359	SLCO6A1	0	0	0	0	0	0	0	0	0
TCONS_00318809	XLOC_125856	XLOC_125856	0	0	0	0	0	0	0	0	0
TCONS_00310080	XLOC_121510	XLOC_121510	0	0	0	0	0	0	0	0	0
TCONS_00310474	XLOC_121672	XLOC_121672	0	0	0	0	0	0.029423	0	0.029423	0
TCONS_00334239	XLOC_133199	XLOC_133199	0	0	0	0	0	0	0	0	0
TCONS_00329346	XLOC_130658	XLOC_130658	0	0	0	0	0	0	0	0	0
TCONS_00330165	XLOC_131117	XLOC_131117	0	0	0	0	0	0	0	0	0
TCONS_00332712	XLOC_132383	XLOC_132383	0	0	0	0	0	0	0	0	0
TCONS_00344494	XLOC_137931	XLOC_137931	0	0	0	0	0	0	0	0	0
TCONS_00346067	ENSG00000078053	AMPH	0	0	0	0	0	0	0	0	0
TCONS_00357809	ENSG00000183166	CALN1	0	0	0	0	0	0	0	0	0.005471
TCONS_00359359	XLOC_144044	XLOC_144044	0	0	0	0	0	0	0	0	0.032779
TCONS_00360770	XLOC_144439	XLOC_144439	0	0	0	0	0	0	0	0	0
TCONS_00361236	XLOC_144726	XLOC_144726	0	0	0	0	0	0	0	0	0
TCONS_00361530	XLOC_144858	XLOC_144858	0	0	0	0	0	0	0	0	0
TCONS_00366556	XLOC_146905	XLOC_146905	0.028717	0	0	0	0	0	0	0	0
TCONS_00374809	XLOC_150805	XLOC_150805	0	0	0	0	0	0	0	0	0
TCONS_00369689	XLOC_148506	XLOC_148506	0	0	0	0	0	0	0	0	0.009792
TCONS_00377983	XLOC_152361	XLOC_152361	0	0	0	0	0	0	0	0	0
TCONS_00369839	XLOC_148602	XLOC_148602	0	0	0	0	0	0	0	0	0.024017
TCONS_00379324	XLOC_153003	XLOC_153003	0	0	0	0	0	0	0	0	0
TCONS_00379503	XLOC_153100	XLOC_153100	0	0	0	0	0	0	0	0	0
TCONS_00371097	XLOC_149215	XLOC_149215	0	0	0	0	0	0	0	0	0
TCONS_00390520	XLOC_158128	XLOC_158128	0	0	0	0	0	0	0	0	0
TCONS_00383230	XLOC_154811	XLOC_154811	0	0	0	0	0	0	0	0	0
TCONS_00394025	XLOC_159874	XLOC_159874	0	0	0	0	0	0	0	0	0
TCONS_00396096	XLOC_160884	XLOC_160884	0	0	0	0	0	0	0.025631	0	0
TCONS_00404754	XLOC_164960	XLOC_164960	0	0	0	0	0	0	0	0	0
TCONS_00398213	XLOC_161718	XLOC_161718	0	0	0	0	0	0	0	0	0
TCONS_00401375	XLOC_163321	XLOC_163321	0	0	0	0	0	0	0	0	0
TCONS_00401593	XLOC_163482	XLOC_163482	0	0	0	0	0	0	0	0	0
TCONS_00000375	XLOC_000258	XLOC_000258	0	0	0	0	0	0	0	0	0
TCONS_00000580	XLOC_000432	XLOC_000432	0	0	0	0	0	0	0	0	0.022687
TCONS_00000697	XLOC_000513	XLOC_000513	0	0	0	0	0	0.000901	0	0.000901	0.005336
TCONS_00000777	XLOC_000589	XLOC_000589	0	0	0	0	0	0	0	0	0

## Sheet: lncRNA_UV_cluster 9
transcript_id	gene_id	gene_name	C_0	UV_3	UV_6	UV_9	UV_12	UV_24	UV_48	UV_24	UV_96
ENST00000635159	ENSG00000236601	AL732372.1	0	0	0	0	0	0	0	0	0.003624
ENST00000443772	ENSG00000237491	AL669831.5	0	0	0	0	0	0	0	0	0.030064
ENST00000440516	ENSG00000226286	AL008733.1	0	0	0	0	0	0	0	0	0.012028
ENST00000635451	ENSG00000227634	LINC01714	0	0	0	0	0	0	0.003763	0	0.022185
ENST00000642131	ENSG00000284708	AL031731.1	0	0	0	0	0	0	0	0	0.003418
ENST00000442055	ENSG00000228172	AL020996.1	0	0	0	0	0	0	0	0	0.007391
ENST00000588288	ENSG00000235790	AC114488.2	0	0	0	0	0	0	0	0	0.008178
ENST00000613387	ENSG00000276493	RF00017	0	0	0	0	0	0	0	0	0.002806
ENST00000289890	ENSG00000226438	AL442071.1	0	0	0	0	0	0	0	0	0.000925
ENST00000431759	ENSG00000227533	SLC2A1-AS1	2e-06	0	0	0	0	0	0	0	0.000111
ENST00000640236	ENSG00000283973	AC099795.1	0	0	0	1.3e-05	0	0	0	0	0.008748
ENST00000628123	ENSG00000230615	AL139220.2	0	0	0	0	0	0	0	0	0.030873
ENST00000424246	ENSG00000238140	AC104170.2	0	0	0	0	0	0	0	0	0.008642
ENST00000453229	ENSG00000235545	AC103923.1	0	0	0	0	0	0	0	0	0.016133
ENST00000424995	ENSG00000223949	ROR1-AS1	0	0	0	0	0.000927	0	0	0	0.007
ENST00000607528	ENSG00000272506	AL357078.3	0	0	0	0	0	0.00024	0	0.00024	0.007733
ENST00000643361	ENSG00000285407	AL033530.1	0	0	0	0	0	0	0	0	5.9e-05
ENST00000494227	ENSG00000240692	RN7SL538P	0	0	0	0	0	0	0	0	0.001106
ENST00000430748	ENSG00000236676	AC117944.1	0	0	0	0	0	0	0	0	0.022443
ENST00000644540	ENSG00000237505	PKN2-AS1	0	0	0	0	0	0	0	0	0.006651
ENST00000446684	ENSG00000224093	AL109613.1	0	0	0	0	0	0	0	0	0.002758
ENST00000422259	ENSG00000235777	DPYD-AS2	0	0	0	0	0	0	0	0	0.00837
ENST00000369989	ENSG00000203897	SPATA42	0	0	0	0	0	0	0	0	0.020287
ENST00000416193	ENSG00000226419	SLC16A1-AS1	1e-06	1.9e-05	0	0	1.1e-05	0	2e-06	0	8.1e-05
ENST00000615424	ENSG00000226067	LINC00623	0	0	0	0	0	0	0	0	0.000828
ENST00000593011	ENSG00000237975	FLG-AS1	0	0	0	0	0	0	0	0	0.007599
ENST00000445097	ENSG00000237975	FLG-AS1	0	0	0	0	0	0	0	0	0.000227
ENST00000415726	ENSG00000224276	AL355388.1	0	0	0	0	0	0	0	0	0.011937
ENST00000458683	ENSG00000230426	ERVMER61-1	0	0	0	0	0	0	0	0	0.005453
ENST00000643151	ENSG00000285280	AL390957.1	0	0	0	0	0	0	0	0	0.004038
ENST00000646999	ENSG00000285280	AL390957.1	0	0	0	0	0	0	0	0	0.001218
ENST00000446333	ENSG00000229191	AL358473.1	0	0	5.2e-05	0	0	0.000635	0.001495	0.000635	0.011042
ENST00000415202	ENSG00000231057	AC096637.2	0	0	0	0	0	0	0	0	0.033103
ENST00000442146	ENSG00000234915	AL360091.3	0	0	0	0	0	0	0	0	0.009134
ENST00000428642	ENSG00000234476	AC092811.1	0	0	0	0	0	0	0	0	0.014116
ENST00000441360	ENSG00000241475	AL160408.4	0	0	0	0	0	0	0	0	0.027003
ENST00000414565	ENSG00000231612	AC104462.1	0	0	0	0	0	0	0	0	0.011699
ENST00000470784	ENSG00000239822	RN7SL754P	0	0	0	0	0	0	0	0	0.026996
ENST00000608273	ENSG00000272764	AL596094.1	0	0	0	0	0	0	0	0	0.000871
ENST00000417359	ENSG00000197308	GATA3-AS1	0	0	0	0	0	0	0	0	0.019454
ENST00000458727	ENSG00000197308	GATA3-AS1	0	0	0	0	0	0	0	0	0.001679
ENST00000433460	ENSG00000230109	LINC02643	0	0	0	0	0	0	0	0	0.025088
ENST00000412244	ENSG00000230500	MKX-AS1	0	0	0	0	0	0	0	0	0.009639
ENST00000453284	ENSG00000226245	ZNF32-AS1	0	0	0.003052	0	0	0	0	0	0.007692
ENST00000605984	ENSG00000272430	LINC02637	0	0	0	0	0	0	0	0	0.187347
ENST00000626907	ENSG00000228065	LINC01515	0	0	0	0	0	0	0	0	0.00186
ENST00000434147	ENSG00000224195	AC022400.1	0	0	0	0.004887	0	0.004518	0	0.004518	0.03636
ENST00000476909	ENSG00000230417	LINC00856	0	0	0	0	0	0	0	0	0.013646
ENST00000454174	ENSG00000232936	AL157400.2	0	0	0	0	0	0	0	0	0.003992
ENST00000432782	ENSG00000232913	PLCE1-AS2	0	0	0	0	0	0	0	0	0.00447
ENST00000447227	ENSG00000228553	AL389885.1	0	0	0	0	0	0	0	0	0.009069
ENST00000451737	ENSG00000234026	AL157834.2	0	0	0	0	0	0.006038	0	0.006038	0.020426
ENST00000454638	ENSG00000226688	ENTPD1-AS1	0	0	0	0	0	0	0	0	0.003568
ENST00000601466	ENSG00000229981	LINC01435	0	0	0	0	0	0	0	0	0.015779
ENST00000600953	ENSG00000229981	LINC01435	0	0	0	0	0	0	0	0	0.023874
ENST00000451656	ENSG00000228417	AL360182.2	0	0	0	0	0	0	0	0	0.024266
ENST00000415417	ENSG00000232139	LINC00867	0	0	0	0	0	0.015199	0	0.015199	0.044293
ENST00000527483	ENSG00000224023	EDRF1-DT	0	0	0	0	0	0	0	0	0.032622
ENST00000622626	ENSG00000254468	AC069287.1	0	0	0	0	0	0	0	0	0.005599
ENST00000527113	ENSG00000254815	AP006284.1	0	0	0	0	0	0	0	0	0.007755
ENST00000529323	ENSG00000255276	RRM1-AS1	0	0	0	0	0	0	0	0	0.000347
ENST00000526633	ENSG00000255410	AC091564.5	0	0	0	0	0	0	0	0	0.001142
ENST00000622955	ENSG00000251364	AC107884.1	0	0	0	0	0	0	0.000468	0	0.002598
ENST00000528553	ENSG00000254530	AC090124.1	0	0	0	0	0	0	0	0	0.007953
ENST00000527727	ENSG00000255227	AC090124.2	0	0	0.018457	0	0	0	0	0	0.080262
ENST00000533531	ENSG00000235661	MIR670HG	0	0	0	0	0	0	0	0	0.024097
ENST00000525563	ENSG00000255091	AC087442.1	0	0	0	0	0	0	0	0	0.005208
ENST00000649677	ENSG00000255314	AC024475.4	0	0	0	0	0	0	0	0	0.002968
ENST00000527054	ENSG00000255299	AP003557.1	0	0	0	0	0	0	0.000334	0	0.013536
ENST00000529069	ENSG00000251637	AP003716.1	0	0	0	0	0	0	0	0	0.058652
ENST00000561588	ENSG00000260877	AP005233.2	0	0	0	0	0	0.00141	0.0004	0.00141	0.137042
[truncated: 1,004 more rows]

## Sheet: lncRNA_UV_cluster 2_GOenrich
Category	ID	Description	GeneRatio	BgRatio	pvalue	padj	geneID	Count
[truncated: 2,632 more rows]

[truncated: 1 more sheets: lncRNA_UV_cluster 5_GOenrich]
